# Supplementary material for: Characterization of sequence determinants of enhancer function using natural genetic variation
Source: eLife journal article supplement (doi:10.7554/elife.76500), 2022-08-31
Supplement: supp [file elife-76500-supp-v1.zip]

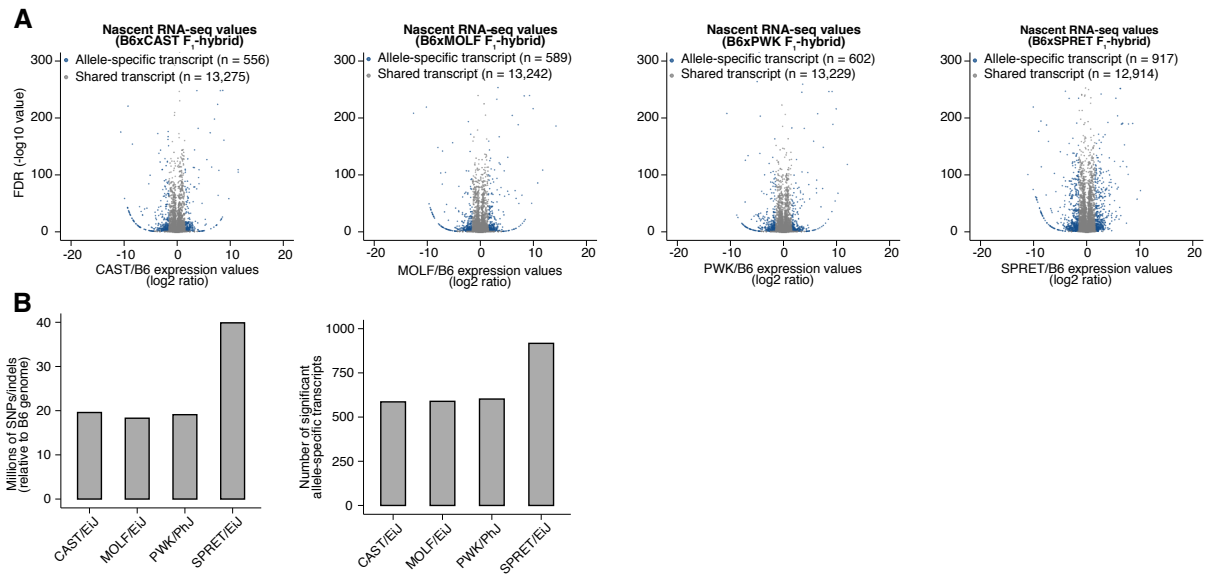

**Figure 1 -- figure supplement 1. Identification of allele-specific transcripts using chromatin-associated RNA-seq.**

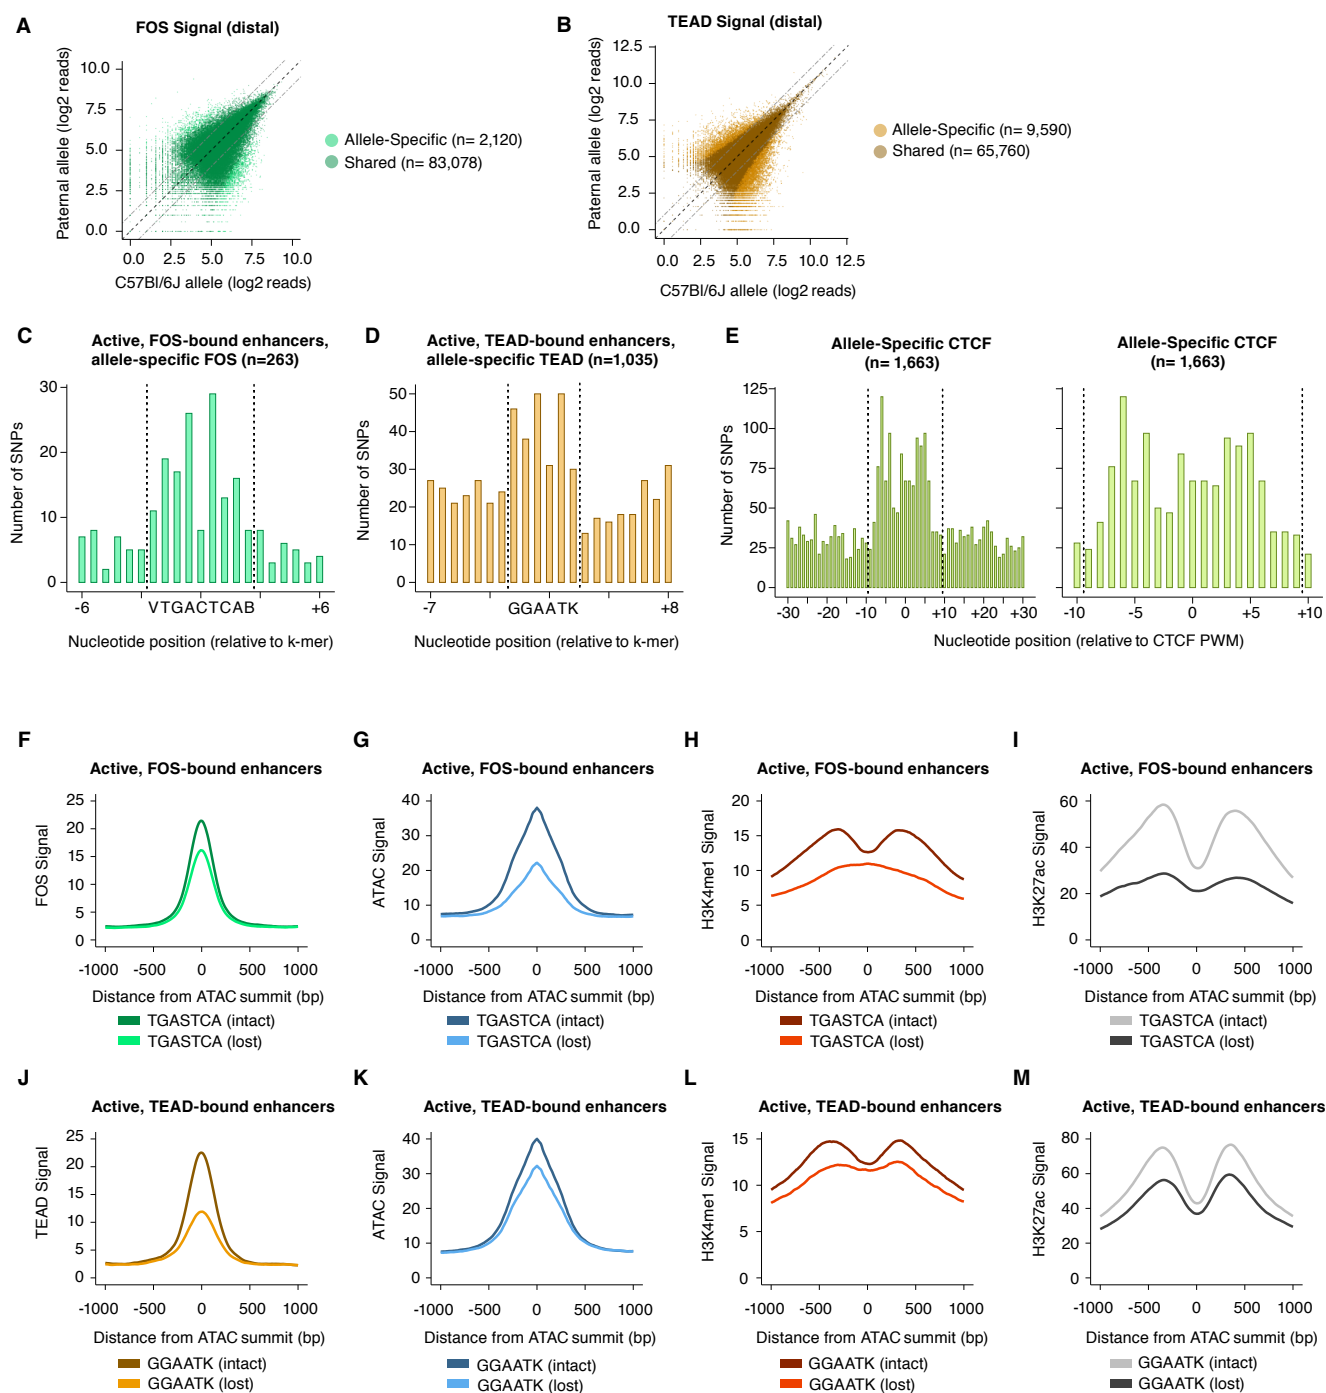

**Figure 3. Sequence motifs and changes in chromatin state at allele-specific TF-bound sites.**
