# Supplementary material for: Characterization of sequence determinants of enhancer function using natural genetic variation
Source: eLife journal article supplement (doi:10.7554/elife.76500), 2022-08-31
Supplement: supp [file elife-76500-supp-v1.zip]

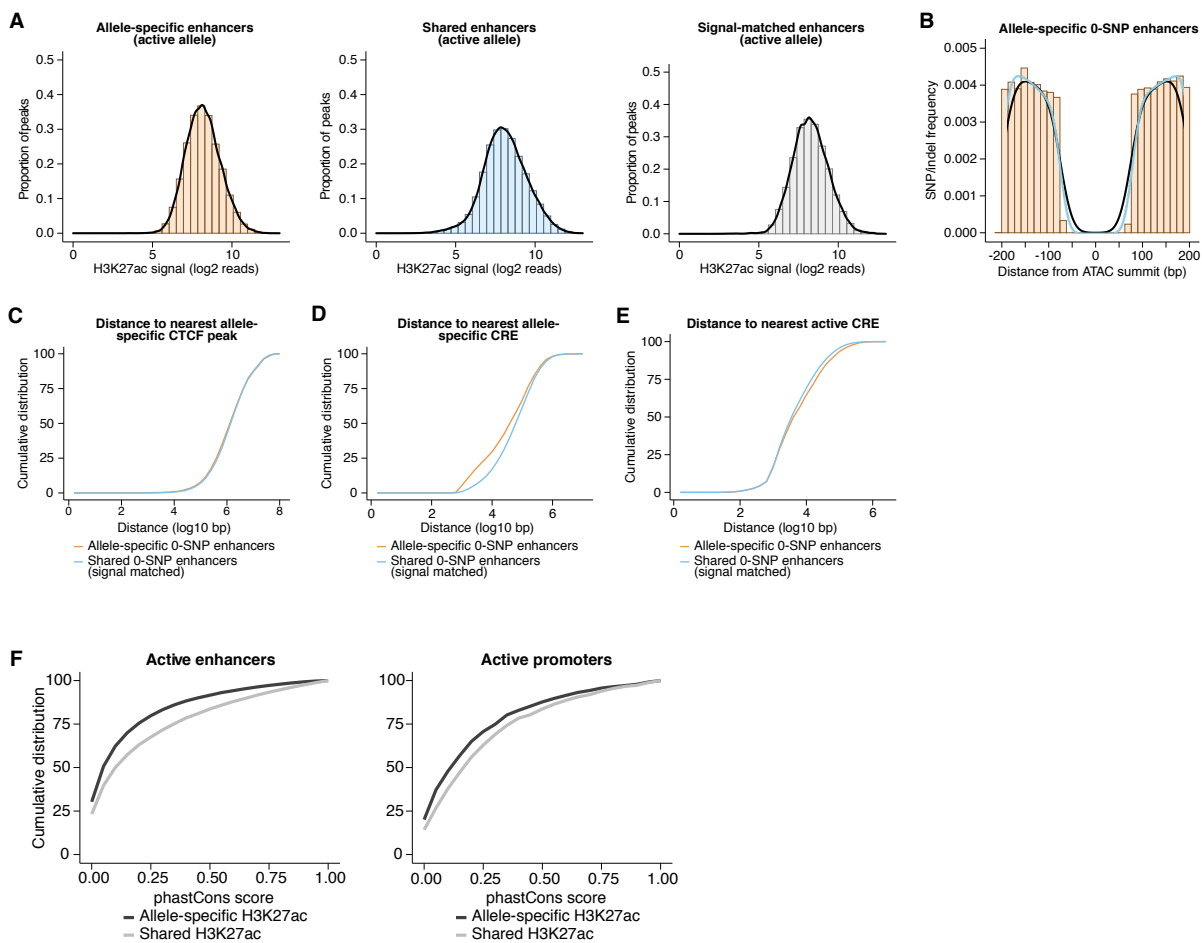

**Figure 2 -- figure supplement 1. Contribution of locus-scale, *cis*-acting mechanisms to enhancer activity.**
