# Supplementary material for: Characterization of sequence determinants of enhancer function using natural genetic variation
Source: eLife journal article supplement (doi:10.7554/elife.76500), 2022-08-31
Supplement: supp [file elife-76500-supp-v1.zip]

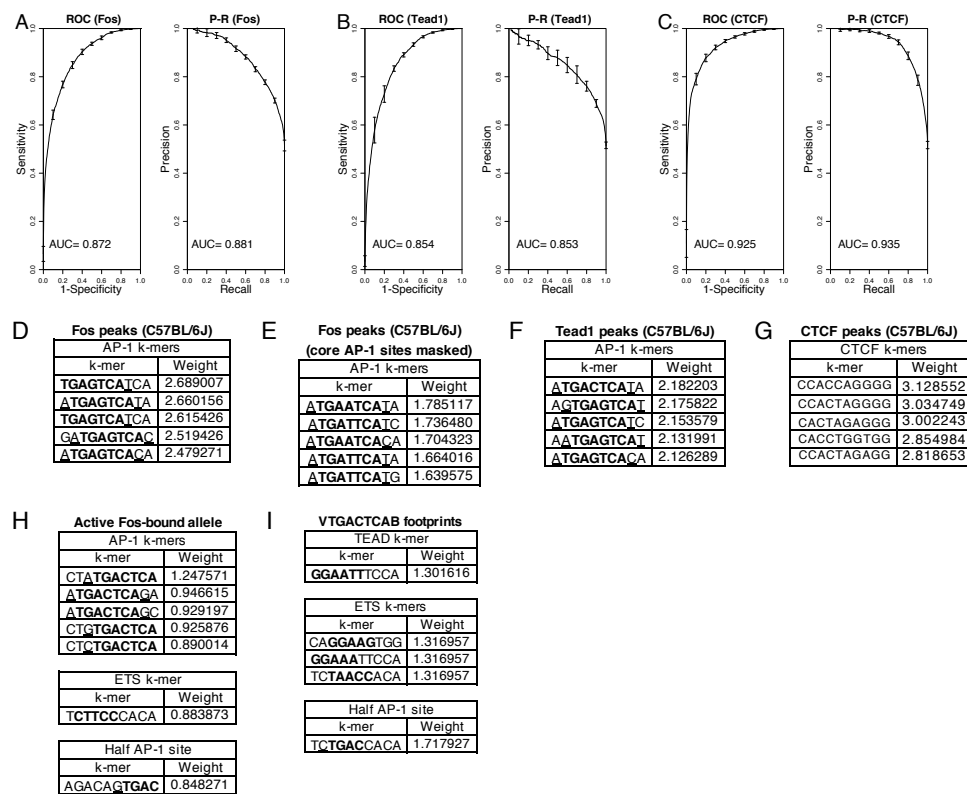

**Figure 6 -- figure supplement 1. Application of the gkm-svm algorithm identifies k-mers required for AP-1, TEAD, and CTCF binding**
