# Supplementary material for: Characterization of sequence determinants of enhancer function using natural genetic variation
Source: eLife journal article supplement (doi:10.7554/elife.76500), 2022-08-31
Supplement: supp [file elife-76500-supp-v1.zip]

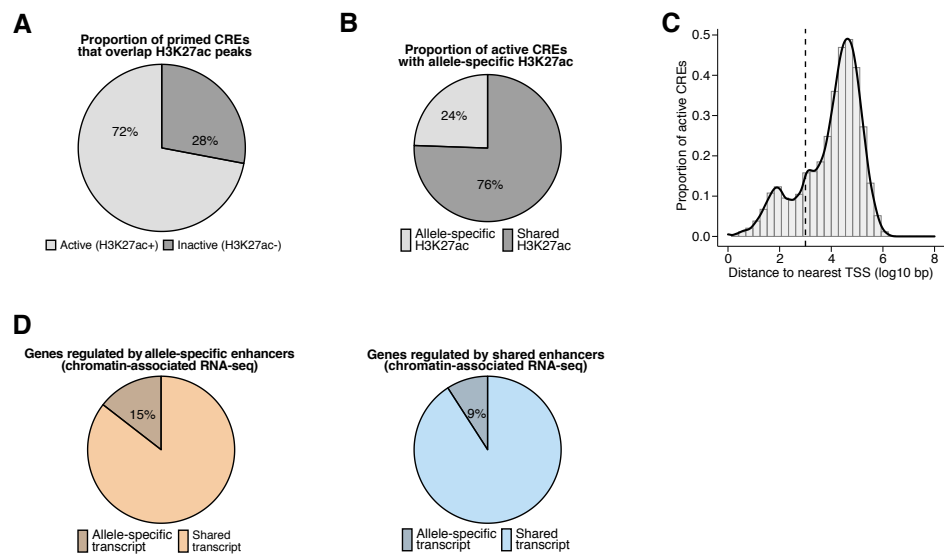

**Figure 1 -- figure supplement 2. Properties of allele-specific enhancers and association with gene expression.**
