# Supplementary material for: Characterization of sequence determinants of enhancer function using natural genetic variation
Source: eLife. 2022 Aug 31;11:e76500. doi: 10.7554/eLife.76500 (PMC9662815; doi:10.7554/eLife.76500)
Supplement: Supplementary file 1. — ATAC-seq peaks were considered highly mappable if they contained a SNP/indel within a 120 bp window centered on their respective ATAC-seq summits. [file elife-76500-supp1.xlsx]

## Sheet: Sheet1
Strain	Total SNPs	Total Indels	Total ATAC peaks	Mappable ATAC peaks
CAST/EiJ	17494259	2671582	112520	55306
MOLF/EiJ	16397626	2432656	102505	47944
PWK/PhJ	17046000	2432656	113733	55693
SPRET/EiJ	36574220	4860425	107178	79351
129S1/SvImJ	5173412	957543	78955	11274
A/J	4936640	929939	131197	18259
BALB/cJ	4576884	869701	84221	10460
DBA/2J	5184367	960055	128314	18800
NOD/ShiLtJ	5105596	935611	136995	20229
