# Supplementary material for: Characterization of sequence determinants of enhancer function using natural genetic variation
Source: eLife. 2022 Aug 31;11:e76500. doi: 10.7554/eLife.76500 (PMC9662815; doi:10.7554/eLife.76500)
Supplement: Supplementary file 2. [file elife-76500-supp2.xlsx]

## Sheet: Sheet1
File Name	Experiment	Condition	Replicate Number	F/R Read	Total Reads	Percent Deduplicated
B6_H3K27ac_HiChIP_0m_B1_R1.fastq.gz	H3K27ac Hi-ChIP	Serum-starved (26 hr)	1	F	159560252	70.88
B6_H3K27ac_HiChIP_0m_B1_R2.fastq.gz	H3K27ac Hi-ChIP	Serum-starved (26 hr)	1	R	159560252	71.84
B6_H3K27ac_HiChIP_0m_B2_R1.fastq.gz	H3K27ac Hi-ChIP	Serum-starved (26 hr)	2	F	154941816	71.72
B6_H3K27ac_HiChIP_0m_B2_R2.fastq.gz	H3K27ac Hi-ChIP	Serum-starved (26 hr)	2	R	154941816	72.35
B6_H3K27ac_HiChIP_0m_B3_R1.fastq.gz	H3K27ac Hi-ChIP	Serum-starved (26 hr)	3	F	117859512	74.82
B6_H3K27ac_HiChIP_0m_B3_R2.fastq.gz	H3K27ac Hi-ChIP	Serum-starved (26 hr)	3	R	117859512	76.77
B6_H3K27ac_HiChIP_90m_B1_R1.fastq.gz	H3K27ac Hi-ChIP	Stimulated (90 min)	1	F	84647603	71.54
B6_H3K27ac_HiChIP_90m_B1_R2.fastq.gz	H3K27ac Hi-ChIP	Stimulated (90 min)	1	R	84647603	72.15
B6_H3K27ac_HiChIP_90m_B2_R1.fastq.gz	H3K27ac Hi-ChIP	Stimulated (90 min)	2	F	93023220	63.43
B6_H3K27ac_HiChIP_90m_B2_R2.fastq.gz	H3K27ac Hi-ChIP	Stimulated (90 min)	2	R	93023220	66.5
B6_H3K27ac_HiChIP_90m_B3_R1.fastq.gz	H3K27ac Hi-ChIP	Stimulated (90 min)	3	F	167432747	32.73
B6_H3K27ac_HiChIP_90m_B3_R2.fastq.gz	H3K27ac Hi-ChIP	Stimulated (90 min)	3	R	167432747	36.03
B6_IgG_0m_B1_R1.fastq.gz	IgG CUT&RUN	Serum-starved (26 hr)	1	F	14322583	81.12
B6_IgG_0m_B1_R2.fastq.gz	IgG CUT&RUN	Serum-starved (26 hr)	1	R	14322583	82.36
B6_IgG_90m_B1_R1.fastq.gz	IgG CUT&RUN	Stimulated (90 min)	1	F	19896244	82.99
B6_IgG_90m_B1_R2.fastq.gz	IgG CUT&RUN	Stimulated (90 min)	1	R	19896244	84.14
B6x129_ATAC_0m_B1_R1.fastq.gz	ATAC-seq	Serum-starved (26 hr)	1	F	14654514	84.87
B6x129_ATAC_0m_B1_R2.fastq.gz	ATAC-seq	Serum-starved (26 hr)	1	R	14654514	85.73
B6x129_ATAC_0m_B2_R1.fastq.gz	ATAC-seq	Serum-starved (26 hr)	2	F	31505223	79.01
B6x129_ATAC_0m_B2_R2.fastq.gz	ATAC-seq	Serum-starved (26 hr)	2	R	31505223	81.94
B6x129_ATAC_90m_B1_R1.fastq.gz	ATAC-seq	Stimulated (90 min)	1	F	24766758	81.53
B6x129_ATAC_90m_B1_R2.fastq.gz	ATAC-seq	Stimulated (90 min)	1	R	24766758	82.99
B6x129_ATAC_90m_B2_R1.fastq.gz	ATAC-seq	Stimulated (90 min)	2	F	26622533	84.53
B6x129_ATAC_90m_B2_R2.fastq.gz	ATAC-seq	Stimulated (90 min)	2	R	26622533	86.91
B6x129_ATAC_90m_B3_R1.fastq.gz	ATAC-seq	Stimulated (90 min)	3	F	13539966	84.76
B6x129_ATAC_90m_B3_R2.fastq.gz	ATAC-seq	Stimulated (90 min)	3	R	13539966	87.99
B6x129_Fos_0m_B1_R1.fastq.gz	Fos CUT&RUN	Serum-starved (26 hr)	1	F	66729654	88.69
B6x129_Fos_0m_B1_R2.fastq.gz	Fos CUT&RUN	Serum-starved (26 hr)	1	R	66729654	90.31
B6x129_Fos_0m_B2_R1.fastq.gz	Fos CUT&RUN	Serum-starved (26 hr)	2	F	40669383	75.9
B6x129_Fos_0m_B2_R2.fastq.gz	Fos CUT&RUN	Serum-starved (26 hr)	2	R	40669383	78.4
B6x129_Fos_90m_B1_R1.fastq.gz	Fos CUT&RUN	Stimulated (90 min)	1	F	90861872	87.16
B6x129_Fos_90m_B1_R2.fastq.gz	Fos CUT&RUN	Stimulated (90 min)	1	R	90861872	88.72
B6x129_Fos_90m_B2_R1.fastq.gz	Fos CUT&RUN	Stimulated (90 min)	2	F	104288450	68.89
B6x129_Fos_90m_B2_R2.fastq.gz	Fos CUT&RUN	Stimulated (90 min)	2	R	104288450	72.92
B6x129_Fos_90m_B3_R1.fastq.gz	Fos CUT&RUN	Stimulated (90 min)	3	F	146731021	81.36
B6x129_Fos_90m_B3_R2.fastq.gz	Fos CUT&RUN	Stimulated (90 min)	3	R	146731021	83.09
B6x129_H3K27ac_0m_B1_R1.fastq.gz	H3K27ac CUT&RUN	Serum-starved (26 hr)	1	F	127328612	86.53
B6x129_H3K27ac_0m_B1_R2.fastq.gz	H3K27ac CUT&RUN	Serum-starved (26 hr)	1	R	127328612	88.29
B6x129_H3K27ac_0m_B2_R1.fastq.gz	H3K27ac CUT&RUN	Serum-starved (26 hr)	2	F	90570261	85.86
B6x129_H3K27ac_0m_B2_R2.fastq.gz	H3K27ac CUT&RUN	Serum-starved (26 hr)	2	R	90570261	87.87
B6x129_H3K27ac_0m_B3_R1.fastq.gz	H3K27ac CUT&RUN	Serum-starved (26 hr)	3	F	47083635	87.2
B6x129_H3K27ac_0m_B3_R2.fastq.gz	H3K27ac CUT&RUN	Serum-starved (26 hr)	3	R	47083635	88.42
B6x129_H3K27ac_90m_B1_R1.fastq.gz	H3K27ac CUT&RUN	Stimulated (90 min)	1	F	52181568	91.05
B6x129_H3K27ac_90m_B1_R2.fastq.gz	H3K27ac CUT&RUN	Stimulated (90 min)	1	R	52181568	92.37
B6x129_H3K27ac_90m_B2_R1.fastq.gz	H3K27ac CUT&RUN	Stimulated (90 min)	2	F	226136719	77.48
B6x129_H3K27ac_90m_B2_R2.fastq.gz	H3K27ac CUT&RUN	Stimulated (90 min)	2	R	226136719	79.31
B6x129_H3K27ac_90m_B3_R1.fastq.gz	H3K27ac CUT&RUN	Stimulated (90 min)	3	F	62551829	83.33
B6x129_H3K27ac_90m_B3_R2.fastq.gz	H3K27ac CUT&RUN	Stimulated (90 min)	3	R	62551829	85.47
B6xAJ_ATAC_0m_B1_R1.fastq.gz	ATAC-seq	Serum-starved (26 hr)	1	F	14684997	80.01
B6xAJ_ATAC_0m_B1_R2.fastq.gz	ATAC-seq	Serum-starved (26 hr)	1	R	14684997	82.01
B6xAJ_ATAC_0m_B2_R1.fastq.gz	ATAC-seq	Serum-starved (26 hr)	2	F	12899487	83.76
B6xAJ_ATAC_0m_B2_R2.fastq.gz	ATAC-seq	Serum-starved (26 hr)	2	R	12899487	85.04
B6xAJ_ATAC_0m_B3_R1.fastq.gz	ATAC-seq	Serum-starved (26 hr)	3	F	12501978	80.68
B6xAJ_ATAC_0m_B3_R2.fastq.gz	ATAC-seq	Serum-starved (26 hr)	3	R	12501978	83.12
B6xAJ_ATAC_90m_B1_R1.fastq.gz	ATAC-seq	Stimulated (90 min)	1	F	27334286	77.63
B6xAJ_ATAC_90m_B1_R2.fastq.gz	ATAC-seq	Stimulated (90 min)	1	R	27334286	80.5
B6xAJ_ATAC_90m_B2_R1.fastq.gz	ATAC-seq	Stimulated (90 min)	2	F	16973386	82.6
B6xAJ_ATAC_90m_B2_R2.fastq.gz	ATAC-seq	Stimulated (90 min)	2	R	16973386	85.66
B6xAJ_ATAC_90m_B3_R1.fastq.gz	ATAC-seq	Stimulated (90 min)	3	F	26960442	81.84
B6xAJ_ATAC_90m_B3_R2.fastq.gz	ATAC-seq	Stimulated (90 min)	3	R	26960442	84.05
B6xAJ_Fos_0m_B1_R1.fastq.gz	Fos CUT&RUN	Serum-starved (26 hr)	1	F	71622424	82.12
B6xAJ_Fos_0m_B1_R2.fastq.gz	Fos CUT&RUN	Serum-starved (26 hr)	1	R	71622424	83.67
B6xAJ_Fos_0m_B2_R1.fastq.gz	Fos CUT&RUN	Serum-starved (26 hr)	2	F	13441660	91.64
B6xAJ_Fos_0m_B2_R2.fastq.gz	Fos CUT&RUN	Serum-starved (26 hr)	2	R	13441660	92.66
B6xAJ_Fos_0m_B3_R1.fastq.gz	Fos CUT&RUN	Serum-starved (26 hr)	3	F	32177926	87.23
B6xAJ_Fos_0m_B3_R2.fastq.gz	Fos CUT&RUN	Serum-starved (26 hr)	3	R	32177926	89.25
B6xAJ_Fos_90m_B2_R1.fastq.gz	Fos CUT&RUN	Stimulated (90 min)	1	F	81803171	85.18
B6xAJ_Fos_90m_B2_R2.fastq.gz	Fos CUT&RUN	Stimulated (90 min)	1	R	81803171	86.9
B6xAJ_Fos_90m_B3_R1.fastq.gz	Fos CUT&RUN	Stimulated (90 min)	2	F	138569047	83.42
B6xAJ_Fos_90m_B3_R2.fastq.gz	Fos CUT&RUN	Stimulated (90 min)	2	R	138569047	85.31
B6xAJ_H3K27ac_0m_B1_R1.fastq.gz	H3K27ac CUT&RUN	Serum-starved (26 hr)	1	F	75820137	84.75
B6xAJ_H3K27ac_0m_B1_R2.fastq.gz	H3K27ac CUT&RUN	Serum-starved (26 hr)	1	R	75820137	86.2
B6xAJ_H3K27ac_0m_B2_R1.fastq.gz	H3K27ac CUT&RUN	Serum-starved (26 hr)	2	F	53146621	84.58
B6xAJ_H3K27ac_0m_B2_R2.fastq.gz	H3K27ac CUT&RUN	Serum-starved (26 hr)	2	R	53146621	87.77
B6xAJ_H3K27ac_0m_B3_R1.fastq.gz	H3K27ac CUT&RUN	Serum-starved (26 hr)	3	F	134802541	85.6
B6xAJ_H3K27ac_0m_B3_R2.fastq.gz	H3K27ac CUT&RUN	Serum-starved (26 hr)	3	R	134802541	88.34
B6xAJ_H3K27ac_90m_B1_R1.fastq.gz	H3K27ac CUT&RUN	Stimulated (90 min)	1	F	63365161	88.02
B6xAJ_H3K27ac_90m_B1_R2.fastq.gz	H3K27ac CUT&RUN	Stimulated (90 min)	1	R	63365161	89.1
B6xAJ_H3K27ac_90m_B2_R1.fastq.gz	H3K27ac CUT&RUN	Stimulated (90 min)	2	F	46392960	87.74
B6xAJ_H3K27ac_90m_B2_R2.fastq.gz	H3K27ac CUT&RUN	Stimulated (90 min)	2	R	46392960	89.36
B6xAJ_H3K27ac_90m_B3_R1.fastq.gz	H3K27ac CUT&RUN	Stimulated (90 min)	3	F	148337745	84.9
B6xAJ_H3K27ac_90m_B3_R2.fastq.gz	H3K27ac CUT&RUN	Stimulated (90 min)	3	R	148337745	86.47
B6xBALB_ATAC_0m_B1_R1.fastq.gz	ATAC-seq	Serum-starved (26 hr)	1	F	16776585	82.82
B6xBALB_ATAC_0m_B1_R2.fastq.gz	ATAC-seq	Serum-starved (26 hr)	1	R	16776585	85.45
B6xBALB_ATAC_0m_B2_R1.fastq.gz	ATAC-seq	Serum-starved (26 hr)	2	F	29478175	77.38
B6xBALB_ATAC_0m_B2_R2.fastq.gz	ATAC-seq	Serum-starved (26 hr)	2	R	29478175	80.6
B6xBALB_ATAC_0m_B3_R1.fastq.gz	ATAC-seq	Serum-starved (26 hr)	3	F	13239648	84.52
B6xBALB_ATAC_0m_B3_R2.fastq.gz	ATAC-seq	Serum-starved (26 hr)	3	R	13239648	86.81
B6xBALB_ATAC_90m_B1_R1.fastq.gz	ATAC-seq	Stimulated (90 min)	1	F	27469524	81.1
B6xBALB_ATAC_90m_B1_R2.fastq.gz	ATAC-seq	Stimulated (90 min)	1	R	27469524	83.43
B6xBALB_ATAC_90m_B2_R1.fastq.gz	ATAC-seq	Stimulated (90 min)	2	F	13132474	84.36
B6xBALB_ATAC_90m_B2_R2.fastq.gz	ATAC-seq	Stimulated (90 min)	2	R	13132474	87.09
B6xBALB_ATAC_90m_B3_R1.fastq.gz	ATAC-seq	Stimulated (90 min)	3	F	36584743	78.63
B6xBALB_ATAC_90m_B3_R2.fastq.gz	ATAC-seq	Stimulated (90 min)	3	R	36584743	83.54
B6xBALB_Fos_0m_B1_R1.fastq.gz	Fos CUT&RUN	Serum-starved (26 hr)	1	F	54319236	76.48
B6xBALB_Fos_0m_B1_R2.fastq.gz	Fos CUT&RUN	Serum-starved (26 hr)	1	R	54319236	80.49
B6xBALB_Fos_0m_B2_R1.fastq.gz	Fos CUT&RUN	Serum-starved (26 hr)	2	F	54596719	74.57
B6xBALB_Fos_0m_B2_R2.fastq.gz	Fos CUT&RUN	Serum-starved (26 hr)	2	R	54596719	78.09
B6xBALB_Fos_0m_B3_R1.fastq.gz	Fos CUT&RUN	Serum-starved (26 hr)	3	F	26882921	86.54
B6xBALB_Fos_0m_B3_R2.fastq.gz	Fos CUT&RUN	Serum-starved (26 hr)	3	R	26882921	88.79
B6xBALB_Fos_90m_B1_R1.fastq.gz	Fos CUT&RUN	Stimulated (90 min)	1	F	142838927	82.02
B6xBALB_Fos_90m_B1_R2.fastq.gz	Fos CUT&RUN	Stimulated (90 min)	1	R	142838927	84.56
B6xBALB_Fos_90m_B2_R1.fastq.gz	Fos CUT&RUN	Stimulated (90 min)	2	F	129783752	75.31
B6xBALB_Fos_90m_B2_R2.fastq.gz	Fos CUT&RUN	Stimulated (90 min)	2	R	129783752	78.43
B6xBALB_Fos_90m_B3_R1.fastq.gz	Fos CUT&RUN	Stimulated (90 min)	3	F	46618726	84.39
B6xBALB_Fos_90m_B3_R2.fastq.gz	Fos CUT&RUN	Stimulated (90 min)	3	R	46618726	85.22
B6xBALB_H3K27ac_0m_B1_R1.fastq.gz	H3K27ac CUT&RUN	Serum-starved (26 hr)	1	F	201454094	80.79
B6xBALB_H3K27ac_0m_B1_R2.fastq.gz	H3K27ac CUT&RUN	Serum-starved (26 hr)	1	R	201454094	83.49
B6xBALB_H3K27ac_0m_B2_R1.fastq.gz	H3K27ac CUT&RUN	Serum-starved (26 hr)	2	F	81995484	36.01
B6xBALB_H3K27ac_0m_B2_R2.fastq.gz	H3K27ac CUT&RUN	Serum-starved (26 hr)	2	R	81995484	37.51
B6xBALB_H3K27ac_0m_B3_R1.fastq.gz	H3K27ac CUT&RUN	Serum-starved (26 hr)	3	F	52780820	89.36
B6xBALB_H3K27ac_0m_B3_R2.fastq.gz	H3K27ac CUT&RUN	Serum-starved (26 hr)	3	R	52780820	90.61
B6xBALB_H3K27ac_90m_B1_R1.fastq.gz	H3K27ac CUT&RUN	Stimulated (90 min)	1	F	152637222	84.42
B6xBALB_H3K27ac_90m_B1_R2.fastq.gz	H3K27ac CUT&RUN	Stimulated (90 min)	1	R	152637222	86.21
B6xBALB_H3K27ac_90m_B2_R1.fastq.gz	H3K27ac CUT&RUN	Stimulated (90 min)	2	F	74343803	40.9
B6xBALB_H3K27ac_90m_B2_R2.fastq.gz	H3K27ac CUT&RUN	Stimulated (90 min)	2	R	74343803	42.29
B6xBALB_H3K27ac_90m_B3_R1.fastq.gz	H3K27ac CUT&RUN	Stimulated (90 min)	3	F	91172947	86.53
B6xBALB_H3K27ac_90m_B3_R2.fastq.gz	H3K27ac CUT&RUN	Stimulated (90 min)	3	R	91172947	87.66
B6xCAST_CTCF_cycling_B1_R1.fastq.gz	CTCF ChIP-seq	Cycling	1	F	74463691	69.01
B6xCAST_CTCF_cycling_B1_R2.fastq.gz	CTCF ChIP-seq	Cycling	1	R	74463691	70.56
B6xCAST_Fos_90m_B1_R1.fastq.gz	Fos ChIP-seq	Stimulated (90 min)	1	F	110899722	77.38
B6xCAST_Fos_90m_B1_R2.fastq.gz	Fos ChIP-seq	Stimulated (90 min)	1	R	110899722	78.86
B6xCAST_Fos_90m_B2_R1.fastq.gz	Fos ChIP-seq	Stimulated (90 min)	2	F	139493860	76.94
B6xCAST_Fos_90m_B2_R2.fastq.gz	Fos ChIP-seq	Stimulated (90 min)	2	R	139493860	78.36
B6xCAST_H3K27ac_0m_B1_R1.fastq.gz	H3K27ac ChIP-seq	Serum-starved (26 hr)	1	F	68793153	89.07
B6xCAST_H3K27ac_0m_B1_R2.fastq.gz	H3K27ac ChIP-seq	Serum-starved (26 hr)	1	R	68793153	89.11
B6xCAST_H3K27ac_0m_B2_R1.fastq.gz	H3K27ac ChIP-seq	Serum-starved (26 hr)	2	F	57402929	89.61
B6xCAST_H3K27ac_0m_B2_R2.fastq.gz	H3K27ac ChIP-seq	Serum-starved (26 hr)	2	R	57402929	90.15
B6xCAST_H3K27ac_10m_B1_R1.fastq.gz	H3K27ac ChIP-seq	Stimulated (10 min)	1	F	64731050	88.7
B6xCAST_H3K27ac_10m_B1_R2.fastq.gz	H3K27ac ChIP-seq	Stimulated (10 min)	1	R	64731050	89.3
B6xCAST_H3K27ac_10m_B2_R1.fastq.gz	H3K27ac ChIP-seq	Stimulated (10 min)	2	F	47350855	89.63
B6xCAST_H3K27ac_10m_B2_R2.fastq.gz	H3K27ac ChIP-seq	Stimulated (10 min)	2	R	47350855	89.42
B6xCAST_H3K27ac_90m_B1_R1.fastq.gz	H3K27ac ChIP-seq	Stimulated (90 min)	1	F	47051414	87.96
B6xCAST_H3K27ac_90m_B1_R2.fastq.gz	H3K27ac ChIP-seq	Stimulated (90 min)	1	R	47051414	89.04
B6xCAST_H3K27ac_90m_B2_R1.fastq.gz	H3K27ac ChIP-seq	Stimulated (90 min)	2	F	41925281	89.05
B6xCAST_H3K27ac_90m_B2_R2.fastq.gz	H3K27ac ChIP-seq	Stimulated (90 min)	2	R	41925281	89.28
B6xCAST_H3K4me1_0m_B1_R1.fastq.gz	H3K4me1 ChIP-seq	Serum-starved (26 hr)	1	F	77961197	91.58
B6xCAST_H3K4me1_0m_B1_R2.fastq.gz	H3K4me1 ChIP-seq	Serum-starved (26 hr)	1	R	77961197	92.09
B6xCAST_H3K4me1_0m_B2_R1.fastq.gz	H3K4me1 ChIP-seq	Serum-starved (26 hr)	2	F	70993723	94.16
B6xCAST_H3K4me1_0m_B2_R2.fastq.gz	H3K4me1 ChIP-seq	Serum-starved (26 hr)	2	R	70993723	94.4
B6xCAST_H3K4me1_90m_B1_R1.fastq.gz	H3K4me1 ChIP-seq	Stimulated (90 min)	1	F	72484053	91.59
B6xCAST_H3K4me1_90m_B1_R2.fastq.gz	H3K4me1 ChIP-seq	Stimulated (90 min)	1	R	72484053	92.23
B6xCAST_H3K4me1_90m_B2_R1.fastq.gz	H3K4me1 ChIP-seq	Stimulated (90 min)	2	F	74067844	94.22
B6xCAST_H3K4me1_90m_B2_R2.fastq.gz	H3K4me1 ChIP-seq	Stimulated (90 min)	2	R	74067844	94.46
B6xCAST_H3K4me2_cycling_B1_R1.fastq.gz	H3K4me2 ChIP-seq	Cycling	1	F	55560052	90.28
B6xCAST_H3K4me2_cycling_B1_R2.fastq.gz	H3K4me2 ChIP-seq	Cycling	1	R	55560052	90.43
B6xCAST_H3K4me2_cycling_B2_R1.fastq.gz	H3K4me2 ChIP-seq	Cycling	2	F	70393311	89.61
B6xCAST_H3K4me2_cycling_B2_R2.fastq.gz	H3K4me2 ChIP-seq	Cycling	2	R	70393311	89.96
B6xCAST_H3K4me3_0m_B1_R1.fastq.gz	H3K4me3 ChIP-seq	Serum-starved (26 hr)	1	F	62721180	75.44
B6xCAST_H3K4me3_0m_B1_R2.fastq.gz	H3K4me3 ChIP-seq	Serum-starved (26 hr)	1	R	62721180	76.81
B6xCAST_H3K4me3_0m_B2_R1.fastq.gz	H3K4me3 ChIP-seq	Serum-starved (26 hr)	2	F	68089749	74.48
B6xCAST_H3K4me3_0m_B2_R2.fastq.gz	H3K4me3 ChIP-seq	Serum-starved (26 hr)	2	R	68089749	76.19
B6xCAST_H3K4me3_90m_B1_R1.fastq.gz	H3K4me3 ChIP-seq	Stimulated (90 min)	1	F	63700774	74.07
B6xCAST_H3K4me3_90m_B1_R2.fastq.gz	H3K4me3 ChIP-seq	Stimulated (90 min)	1	R	63700774	75.57
B6xCAST_H3K4me3_90m_B2_R1.fastq.gz	H3K4me3 ChIP-seq	Stimulated (90 min)	2	F	58707972	74.46
B6xCAST_H3K4me3_90m_B2_R2.fastq.gz	H3K4me3 ChIP-seq	Stimulated (90 min)	2	R	58707972	76.66
B6xCAST_input_B1_R1.fastq.gz	Input DNA (from ChIP-seq)	Stimulated (90 min)	1	F	87312511	62.36
B6xCAST_input_B1_R2.fastq.gz	Input DNA (from ChIP-seq)	Stimulated (90 min)	1	R	87312511	63.61
B6xCAST_input_B2_R1.fastq.gz	Input DNA (from ChIP-seq)	Stimulated (90 min)	2	F	46422133	63.07
B6xCAST_input_B2_R2.fastq.gz	Input DNA (from ChIP-seq)	Stimulated (90 min)	2	R	46422133	63.87
B6xCAST_RNA_0m_B1_R1.fastq.gz	Total RNA-seq	Serum-starved (26 hr)	1	F	16929654	63.84
B6xCAST_RNA_0m_B1_R2.fastq.gz	Total RNA-seq	Serum-starved (26 hr)	1	R	16929654	64.85
B6xCAST_RNA_0m_B2_R1.fastq.gz	Total RNA-seq	Serum-starved (26 hr)	2	F	18741110	56.77
B6xCAST_RNA_0m_B2_R2.fastq.gz	Total RNA-seq	Serum-starved (26 hr)	2	R	18741110	58.01
B6xCAST_RNA_20m_B1_R1.fastq.gz	Total RNA-seq	Stimulated (20 min)	1	F	18668268	65.66
B6xCAST_RNA_20m_B1_R2.fastq.gz	Total RNA-seq	Stimulated (20 min)	1	R	18668268	66.45
B6xCAST_RNA_20m_B2_R1.fastq.gz	Total RNA-seq	Stimulated (20 min)	2	F	16448590	59.3
B6xCAST_RNA_20m_B2_R2.fastq.gz	Total RNA-seq	Stimulated (20 min)	2	R	16448590	60.16
B6xCAST_RNA_90m_B1_R1.fastq.gz	Total RNA-seq	Stimulated (90 min)	1	F	19671234	65.95
B6xCAST_RNA_90m_B1_R2.fastq.gz	Total RNA-seq	Stimulated (90 min)	1	R	19671234	67.08
B6xCAST_RNA_90m_B2_R1.fastq.gz	Total RNA-seq	Stimulated (90 min)	2	F	16472009	56.26
B6xCAST_RNA_90m_B2_R2.fastq.gz	Total RNA-seq	Stimulated (90 min)	2	R	16472009	56.83
B6xCAST_Tead1_0m_B1_R1.fastq.gz	Tead1 ChIP-seq	Serum-starved (26 hr)	1	F	35962164	80.62
B6xCAST_Tead1_0m_B1_R2.fastq.gz	Tead1 ChIP-seq	Serum-starved (26 hr)	1	R	35962164	81.5
B6xCAST_Tead1_0m_B2_R1.fastq.gz	Tead1 ChIP-seq	Serum-starved (26 hr)	2	F	31747019	83.92
B6xCAST_Tead1_0m_B2_R2.fastq.gz	Tead1 ChIP-seq	Serum-starved (26 hr)	2	R	31747019	84.57
B6xCAST_Tead1_90m_B1_R1.fastq.gz	Tead1 ChIP-seq	Stimulated (90 min)	1	F	25928408	81.37
B6xCAST_Tead1_90m_B1_R2.fastq.gz	Tead1 ChIP-seq	Stimulated (90 min)	1	R	25928408	81.74
B6xCAST_Tead1_90m_B2_R1.fastq.gz	Tead1 ChIP-seq	Stimulated (90 min)	2	F	38370776	85.89
B6xCAST_Tead1_90m_B2_R2.fastq.gz	Tead1 ChIP-seq	Stimulated (90 min)	2	R	38370776	86.52
B6xDBA_ATAC_0m_B1_R1.fastq.gz	ATAC-seq	Serum-starved (26 hr)	1	F	12766719	80.8
B6xDBA_ATAC_0m_B1_R2.fastq.gz	ATAC-seq	Serum-starved (26 hr)	1	R	12766719	82.8
B6xDBA_ATAC_0m_B2_R1.fastq.gz	ATAC-seq	Serum-starved (26 hr)	2	F	14658804	79.77
B6xDBA_ATAC_0m_B2_R2.fastq.gz	ATAC-seq	Serum-starved (26 hr)	2	R	14658804	81.75
B6xDBA_ATAC_0m_B3_R1.fastq.gz	ATAC-seq	Serum-starved (26 hr)	3	F	31756963	76.45
B6xDBA_ATAC_0m_B3_R2.fastq.gz	ATAC-seq	Serum-starved (26 hr)	3	R	31756963	80.27
B6xDBA_ATAC_90m_B1_R1.fastq.gz	ATAC-seq	Stimulated (90 min)	1	F	13973224	80.36
B6xDBA_ATAC_90m_B1_R2.fastq.gz	ATAC-seq	Stimulated (90 min)	1	R	13973224	83.21
B6xDBA_ATAC_90m_B2_R1.fastq.gz	ATAC-seq	Stimulated (90 min)	2	F	17174861	80.44
B6xDBA_ATAC_90m_B2_R2.fastq.gz	ATAC-seq	Stimulated (90 min)	2	R	17174861	83.36
B6xDBA_ATAC_90m_B3_R1.fastq.gz	ATAC-seq	Stimulated (90 min)	3	F	23892754	81.79
B6xDBA_ATAC_90m_B3_R2.fastq.gz	ATAC-seq	Stimulated (90 min)	3	R	23892754	83.16
B6xDBA_Fos_0m_B2_R1.fastq.gz	Fos CUT&RUN	Serum-starved (26 hr)	1	F	36678182	85.37
B6xDBA_Fos_0m_B2_R2.fastq.gz	Fos CUT&RUN	Serum-starved (26 hr)	1	R	36678182	88.46
B6xDBA_Fos_0m_B3_R1.fastq.gz	Fos CUT&RUN	Serum-starved (26 hr)	2	F	36022314	87.81
B6xDBA_Fos_0m_B3_R2.fastq.gz	Fos CUT&RUN	Serum-starved (26 hr)	2	R	36022314	90.88
B6xDBA_Fos_90m_B1_R1.fastq.gz	Fos CUT&RUN	Stimulated (90 min)	1	F	149950298	83.29
B6xDBA_Fos_90m_B1_R2.fastq.gz	Fos CUT&RUN	Stimulated (90 min)	1	R	149950298	86.1
B6xDBA_Fos_90m_B2_R1.fastq.gz	Fos CUT&RUN	Stimulated (90 min)	2	F	40586161	85.34
B6xDBA_Fos_90m_B2_R2.fastq.gz	Fos CUT&RUN	Stimulated (90 min)	2	R	40586161	87.93
B6xDBA_Fos_90m_B3_R1.fastq.gz	Fos CUT&RUN	Stimulated (90 min)	3	F	42152948	88.13
B6xDBA_Fos_90m_B3_R2.fastq.gz	Fos CUT&RUN	Stimulated (90 min)	3	R	42152948	89.74
B6xDBA_Fos_90m_B4_R1.fastq.gz	Fos CUT&RUN	Stimulated (90 min)	4	F	61885143	81.94
B6xDBA_Fos_90m_B4_R2.fastq.gz	Fos CUT&RUN	Stimulated (90 min)	4	R	61885143	84.33
B6xDBA_H3K27ac_0m_B1_R1.fastq.gz	H3K27ac CUT&RUN	Serum-starved (26 hr)	1	F	51927269	92.66
B6xDBA_H3K27ac_0m_B1_R2.fastq.gz	H3K27ac CUT&RUN	Serum-starved (26 hr)	1	R	51927269	93.61
B6xDBA_H3K27ac_0m_B2_R1.fastq.gz	H3K27ac CUT&RUN	Serum-starved (26 hr)	2	F	61768907	88.17
B6xDBA_H3K27ac_0m_B2_R2.fastq.gz	H3K27ac CUT&RUN	Serum-starved (26 hr)	2	R	61768907	89.73
B6xDBA_H3K27ac_0m_B3_R1.fastq.gz	H3K27ac CUT&RUN	Serum-starved (26 hr)	3	F	54428857	89.51
B6xDBA_H3K27ac_0m_B3_R2.fastq.gz	H3K27ac CUT&RUN	Serum-starved (26 hr)	3	R	54428857	91.51
B6xDBA_H3K27ac_0m_B4_R1.fastq.gz	H3K27ac CUT&RUN	Serum-starved (26 hr)	4	F	61204059	85.73
B6xDBA_H3K27ac_0m_B4_R2.fastq.gz	H3K27ac CUT&RUN	Serum-starved (26 hr)	4	R	61204059	87.5
B6xDBA_H3K27ac_90m_B1_R1.fastq.gz	H3K27ac CUT&RUN	Stimulated (90 min)	1	F	122030175	88.1
B6xDBA_H3K27ac_90m_B1_R2.fastq.gz	H3K27ac CUT&RUN	Stimulated (90 min)	1	R	122030175	89.52
B6xDBA_H3K27ac_90m_B2_R1.fastq.gz	H3K27ac CUT&RUN	Stimulated (90 min)	2	F	63251399	89.75
B6xDBA_H3K27ac_90m_B2_R2.fastq.gz	H3K27ac CUT&RUN	Stimulated (90 min)	2	R	63251399	91.11
B6xDBA_H3K27ac_90m_B3_R1.fastq.gz	H3K27ac CUT&RUN	Stimulated (90 min)	3	F	77209592	86.8
B6xDBA_H3K27ac_90m_B3_R2.fastq.gz	H3K27ac CUT&RUN	Stimulated (90 min)	3	R	77209592	89.35
B6xDBA_H3K27ac_90m_B4_R1.fastq.gz	H3K27ac CUT&RUN	Stimulated (90 min)	4	F	56344326	82.91
B6xDBA_H3K27ac_90m_B4_R2.fastq.gz	H3K27ac CUT&RUN	Stimulated (90 min)	4	R	56344326	86.01
B6xMOLF_ATAC_0m_B1_R1.fastq.gz	ATAC-seq	Serum-starved (26 hr)	1	F	31645521	76.05
B6xMOLF_ATAC_0m_B2_R1.fastq.gz	ATAC-seq	Serum-starved (26 hr)	2	F	35560251	52.89
B6xMOLF_ATAC_10m_B1_R1.fastq.gz	ATAC-seq	Stimulated (10 min)	1	F	21447698	64.81
B6xMOLF_ATAC_10m_B2_R1.fastq.gz	ATAC-seq	Stimulated (10 min)	2	F	41845746	56.61
B6xMOLF_ATAC_90m_B1_R1.fastq.gz	ATAC-seq	Stimulated (90 min)	1	F	14881018	74.33
B6xMOLF_ATAC_90m_B2_R1.fastq.gz	ATAC-seq	Stimulated (90 min)	2	F	23711167	60.43
B6xMOLF_CTCF_cycling_B1_R1.fastq.gz	CTCF ChIP-seq	Cycling	1	F	64267429	47.41
B6xMOLF_CTCF_cycling_B1_R2.fastq.gz	CTCF ChIP-seq	Cycling	1	R	64267429	50.24
B6xMOLF_CTCF_cycling_B2_R1.fastq.gz	CTCF ChIP-seq	Cycling	2	F	46239113	57.19
B6xMOLF_CTCF_cycling_B2_R2.fastq.gz	CTCF ChIP-seq	Cycling	2	R	46239113	59.52
B6xMOLF_Fos_90m_B1_R1.fastq.gz	Fos ChIP-seq	Stimulated (90 min)	1	F	117123153	77.65
B6xMOLF_Fos_90m_B1_R2.fastq.gz	Fos ChIP-seq	Stimulated (90 min)	1	R	117123153	79.28
B6xMOLF_Fos_90m_B2_R1.fastq.gz	Fos ChIP-seq	Stimulated (90 min)	2	F	98286364	70.56
B6xMOLF_Fos_90m_B2_R2.fastq.gz	Fos ChIP-seq	Stimulated (90 min)	2	R	98286364	73.88
B6xMOLF_H3K27ac_0m_B1_R1.fastq.gz	H3K27ac ChIP-seq	Serum-starved (26 hr)	1	F	52296119	89.03
B6xMOLF_H3K27ac_0m_B1_R2.fastq.gz	H3K27ac ChIP-seq	Serum-starved (26 hr)	1	R	52296119	88.98
B6xMOLF_H3K27ac_0m_B2_R1.fastq.gz	H3K27ac ChIP-seq	Serum-starved (26 hr)	2	F	46421498	89.28
B6xMOLF_H3K27ac_0m_B2_R2.fastq.gz	H3K27ac ChIP-seq	Serum-starved (26 hr)	2	R	46421498	89.07
B6xMOLF_H3K27ac_10m_B1_R1.fastq.gz	H3K27ac ChIP-seq	Stimulated (10 min)	1	F	50170264	88.71
B6xMOLF_H3K27ac_10m_B1_R2.fastq.gz	H3K27ac ChIP-seq	Stimulated (10 min)	1	R	50170264	89.14
B6xMOLF_H3K27ac_10m_B2_R1.fastq.gz	H3K27ac ChIP-seq	Stimulated (10 min)	2	F	65823510	86.36
B6xMOLF_H3K27ac_10m_B2_R2.fastq.gz	H3K27ac ChIP-seq	Stimulated (10 min)	2	R	65823510	86.4
B6xMOLF_H3K27ac_90m_B1_R1.fastq.gz	H3K27ac ChIP-seq	Stimulated (90 min)	1	F	48482919	88.83
B6xMOLF_H3K27ac_90m_B1_R2.fastq.gz	H3K27ac ChIP-seq	Stimulated (90 min)	1	R	48482919	89.21
B6xMOLF_H3K27ac_90m_B2_R1.fastq.gz	H3K27ac ChIP-seq	Stimulated (90 min)	2	F	48440300	87
B6xMOLF_H3K27ac_90m_B2_R2.fastq.gz	H3K27ac ChIP-seq	Stimulated (90 min)	2	R	48440300	87.17
B6xMOLF_H3K4me1_0m_B1_R1.fastq.gz	H3K4me1 ChIP-seq	Serum-starved (26 hr)	1	F	76751169	91.81
B6xMOLF_H3K4me1_0m_B1_R2.fastq.gz	H3K4me1 ChIP-seq	Serum-starved (26 hr)	1	R	76751169	92.59
B6xMOLF_H3K4me1_0m_B2_R1.fastq.gz	H3K4me1 ChIP-seq	Serum-starved (26 hr)	2	F	70567819	94.43
B6xMOLF_H3K4me1_0m_B2_R2.fastq.gz	H3K4me1 ChIP-seq	Serum-starved (26 hr)	2	R	70567819	94.7
B6xMOLF_H3K4me1_90m_B1_R1.fastq.gz	H3K4me1 ChIP-seq	Stimulated (90 min)	1	F	61259158	91.11
B6xMOLF_H3K4me1_90m_B1_R2.fastq.gz	H3K4me1 ChIP-seq	Stimulated (90 min)	1	R	61259158	92.06
B6xMOLF_H3K4me1_90m_B2_R1.fastq.gz	H3K4me1 ChIP-seq	Stimulated (90 min)	2	F	63063232	94.03
B6xMOLF_H3K4me1_90m_B2_R2.fastq.gz	H3K4me1 ChIP-seq	Stimulated (90 min)	2	R	63063232	94.45
B6xMOLF_H3K4me2_cycling_B1_R1.fastq.gz	H3K4me2 ChIP-seq	Cycling	1	F	67464390	86.95
B6xMOLF_H3K4me2_cycling_B1_R2.fastq.gz	H3K4me2 ChIP-seq	Cycling	1	R	67464390	86.62
B6xMOLF_H3K4me2_cycling_B2_R1.fastq.gz	H3K4me2 ChIP-seq	Cycling	2	F	78295959	87.31
B6xMOLF_H3K4me2_cycling_B2_R2.fastq.gz	H3K4me2 ChIP-seq	Cycling	2	R	78295959	86.92
B6xMOLF_H3K4me3_0m_B1_R1.fastq.gz	H3K4me3 ChIP-seq	Serum-starved (26 hr)	1	F	66841945	76.45
B6xMOLF_H3K4me3_0m_B1_R2.fastq.gz	H3K4me3 ChIP-seq	Serum-starved (26 hr)	1	R	66841945	78
B6xMOLF_H3K4me3_0m_B2_R1.fastq.gz	H3K4me3 ChIP-seq	Serum-starved (26 hr)	2	F	86885827	73.75
B6xMOLF_H3K4me3_0m_B2_R2.fastq.gz	H3K4me3 ChIP-seq	Serum-starved (26 hr)	2	R	86885827	75.74
B6xMOLF_H3K4me3_90m_B1_R1.fastq.gz	H3K4me3 ChIP-seq	Stimulated (90 min)	1	F	56120552	76.01
B6xMOLF_H3K4me3_90m_B1_R2.fastq.gz	H3K4me3 ChIP-seq	Stimulated (90 min)	1	R	56120552	77.9
B6xMOLF_H3K4me3_90m_B2_R1.fastq.gz	H3K4me3 ChIP-seq	Stimulated (90 min)	2	F	45785843	78.7
B6xMOLF_H3K4me3_90m_B2_R2.fastq.gz	H3K4me3 ChIP-seq	Stimulated (90 min)	2	R	45785843	80.35
B6xMOLF_input_B1_R1.fastq.gz	Input DNA (from ChIP-seq)	Stimulated (90 min)	1	F	90419256	58.43
B6xMOLF_input_B1_R2.fastq.gz	Input DNA (from ChIP-seq)	Stimulated (90 min)	1	R	90419256	60.43
B6xMOLF_input_B2_R1.fastq.gz	Input DNA (from ChIP-seq)	Stimulated (90 min)	2	F	97004980	51.74
B6xMOLF_input_B2_R2.fastq.gz	Input DNA (from ChIP-seq)	Stimulated (90 min)	2	R	97004980	53.87
B6xMOLF_RNA_0m_B1_R1.fastq.gz	Total RNA-seq	Serum-starved (26 hr)	1	F	18386558	62.27
B6xMOLF_RNA_0m_B1_R2.fastq.gz	Total RNA-seq	Serum-starved (26 hr)	1	R	18386558	63.81
B6xMOLF_RNA_0m_B2_R1.fastq.gz	Total RNA-seq	Serum-starved (26 hr)	2	F	16635989	54.69
B6xMOLF_RNA_0m_B2_R2.fastq.gz	Total RNA-seq	Serum-starved (26 hr)	2	R	16635989	56.29
B6xMOLF_RNA_20m_B1_R1.fastq.gz	Total RNA-seq	Stimulated (20 min)	1	F	20219288	64.32
B6xMOLF_RNA_20m_B1_R2.fastq.gz	Total RNA-seq	Stimulated (20 min)	1	R	20219288	65.9
B6xMOLF_RNA_20m_B2_R1.fastq.gz	Total RNA-seq	Stimulated (20 min)	2	F	15670746	52.11
B6xMOLF_RNA_20m_B2_R2.fastq.gz	Total RNA-seq	Stimulated (20 min)	2	R	15670746	52.78
B6xMOLF_RNA_90m_B1_R1.fastq.gz	Total RNA-seq	Stimulated (90 min)	1	F	17643445	66.04
B6xMOLF_RNA_90m_B1_R2.fastq.gz	Total RNA-seq	Stimulated (90 min)	1	R	17643445	67.6
B6xMOLF_RNA_90m_B2_R1.fastq.gz	Total RNA-seq	Stimulated (90 min)	2	F	16630484	51.68
B6xMOLF_RNA_90m_B2_R2.fastq.gz	Total RNA-seq	Stimulated (90 min)	2	R	16630484	53.01
B6xMOLF_Tead1_0m_B1_R1.fastq.gz	Tead1 ChIP-seq	Serum-starved (26 hr)	1	F	35535302	81.01
B6xMOLF_Tead1_0m_B1_R2.fastq.gz	Tead1 ChIP-seq	Serum-starved (26 hr)	1	R	35535302	81.64
B6xMOLF_Tead1_0m_B2_R1.fastq.gz	Tead1 ChIP-seq	Serum-starved (26 hr)	2	F	33929962	82.95
B6xMOLF_Tead1_0m_B2_R2.fastq.gz	Tead1 ChIP-seq	Serum-starved (26 hr)	2	R	33929962	83.78
B6xMOLF_Tead1_90m_B1_R1.fastq.gz	Tead1 ChIP-seq	Stimulated (90 min)	1	F	26839401	81.22
B6xMOLF_Tead1_90m_B1_R2.fastq.gz	Tead1 ChIP-seq	Stimulated (90 min)	1	R	26839401	81.87
B6xMOLF_Tead1_90m_B2_R1.fastq.gz	Tead1 ChIP-seq	Stimulated (90 min)	2	F	26455038	85.39
B6xMOLF_Tead1_90m_B2_R2.fastq.gz	Tead1 ChIP-seq	Stimulated (90 min)	2	R	26455038	86.13
B6xNOD_ATAC_0m_B1_R1.fastq.gz	ATAC-seq	Serum-starved (26 hr)	1	F	26292140	81.45
B6xNOD_ATAC_0m_B1_R2.fastq.gz	ATAC-seq	Serum-starved (26 hr)	1	R	26292140	83.3
B6xNOD_ATAC_90m_B1_R1.fastq.gz	ATAC-seq	Stimulated (90 min)	1	F	7519132	86.75
B6xNOD_ATAC_90m_B1_R2.fastq.gz	ATAC-seq	Stimulated (90 min)	1	R	7519132	85.55
B6xNOD_ATAC_90m_B2_R1.fastq.gz	ATAC-seq	Stimulated (90 min)	2	F	14203118	82.52
B6xNOD_ATAC_90m_B2_R2.fastq.gz	ATAC-seq	Stimulated (90 min)	2	R	14203118	84.86
B6xNOD_ATAC_90m_B3_R1.fastq.gz	ATAC-seq	Stimulated (90 min)	3	F	35220308	78.65
B6xNOD_ATAC_90m_B3_R2.fastq.gz	ATAC-seq	Stimulated (90 min)	3	R	35220308	83.48
B6xNOD_Fos_0m_B1_R1.fastq.gz	Fos CUT&RUN	Serum-starved (26 hr)	1	F	52088810	84.67
B6xNOD_Fos_0m_B1_R2.fastq.gz	Fos CUT&RUN	Serum-starved (26 hr)	1	R	52088810	86.63
B6xNOD_Fos_0m_B2_R1.fastq.gz	Fos CUT&RUN	Serum-starved (26 hr)	2	F	64821987	79.52
B6xNOD_Fos_0m_B2_R2.fastq.gz	Fos CUT&RUN	Serum-starved (26 hr)	2	R	64821987	81.98
B6xNOD_Fos_0m_B3_R1.fastq.gz	Fos CUT&RUN	Serum-starved (26 hr)	3	F	18735063	89.96
B6xNOD_Fos_0m_B3_R2.fastq.gz	Fos CUT&RUN	Serum-starved (26 hr)	3	R	18735063	91.44
B6xNOD_Fos_90m_B1_R1.fastq.gz	Fos CUT&RUN	Stimulated (90 min)	1	F	59108451	87.81
B6xNOD_Fos_90m_B1_R2.fastq.gz	Fos CUT&RUN	Stimulated (90 min)	1	R	59108451	90.14
B6xNOD_Fos_90m_B3_R1.fastq.gz	Fos CUT&RUN	Stimulated (90 min)	2	F	125499026	89.7
B6xNOD_Fos_90m_B3_R2.fastq.gz	Fos CUT&RUN	Stimulated (90 min)	2	R	125499026	90.88
B6xNOD_Fos_90m_B4_R1.fastq.gz	Fos CUT&RUN	Stimulated (90 min)	3	F	142878839	81.19
B6xNOD_Fos_90m_B4_R2.fastq.gz	Fos CUT&RUN	Stimulated (90 min)	3	R	142878839	83.98
B6xNOD_H3K27ac_0m_B1_R1.fastq.gz	H3K27ac CUT&RUN	Serum-starved (26 hr)	1	F	54227865	91.77
B6xNOD_H3K27ac_0m_B1_R2.fastq.gz	H3K27ac CUT&RUN	Serum-starved (26 hr)	1	R	54227865	93.12
B6xNOD_H3K27ac_0m_B2_R1.fastq.gz	H3K27ac CUT&RUN	Serum-starved (26 hr)	2	F	78662456	71.53
B6xNOD_H3K27ac_0m_B2_R2.fastq.gz	H3K27ac CUT&RUN	Serum-starved (26 hr)	2	R	78662456	74.51
B6xNOD_H3K27ac_0m_B3_R1.fastq.gz	H3K27ac CUT&RUN	Serum-starved (26 hr)	3	F	79427905	85.94
B6xNOD_H3K27ac_0m_B3_R2.fastq.gz	H3K27ac CUT&RUN	Serum-starved (26 hr)	3	R	79427905	87.63
B6xNOD_H3K27ac_0m_B4_R1.fastq.gz	H3K27ac CUT&RUN	Serum-starved (26 hr)	4	F	120329780	81.42
B6xNOD_H3K27ac_0m_B4_R2.fastq.gz	H3K27ac CUT&RUN	Serum-starved (26 hr)	4	R	120329780	84.26
B6xNOD_H3K27ac_90m_B1_R1.fastq.gz	H3K27ac CUT&RUN	Stimulated (90 min)	1	F	55841399	91.76
B6xNOD_H3K27ac_90m_B1_R2.fastq.gz	H3K27ac CUT&RUN	Stimulated (90 min)	1	R	55841399	92.87
B6xNOD_H3K27ac_90m_B2_R1.fastq.gz	H3K27ac CUT&RUN	Stimulated (90 min)	2	F	94236194	79.05
B6xNOD_H3K27ac_90m_B2_R2.fastq.gz	H3K27ac CUT&RUN	Stimulated (90 min)	2	R	94236194	81.37
B6xNOD_H3K27ac_90m_B3_R1.fastq.gz	H3K27ac CUT&RUN	Stimulated (90 min)	3	F	96928117	87.95
B6xNOD_H3K27ac_90m_B3_R2.fastq.gz	H3K27ac CUT&RUN	Stimulated (90 min)	3	R	96928117	89.46
B6xNOD_H3K27ac_90m_B4_R1.fastq.gz	H3K27ac CUT&RUN	Stimulated (90 min)	4	F	125521983	83.44
B6xNOD_H3K27ac_90m_B4_R2.fastq.gz	H3K27ac CUT&RUN	Stimulated (90 min)	4	R	125521983	85.99
B6xPWK_CTCF_cycling_B1_R1.fastq.gz	CTCF ChIP-seq	Cycling	1	F	52667360	49.56
B6xPWK_CTCF_cycling_B1_R2.fastq.gz	CTCF ChIP-seq	Cycling	1	R	52667360	52.67
B6xPWK_CTCF_cycling_B2_R1.fastq.gz	CTCF ChIP-seq	Cycling	2	F	64742082	43.67
B6xPWK_CTCF_cycling_B2_R2.fastq.gz	CTCF ChIP-seq	Cycling	2	R	64742082	47.24
B6xPWK_Fos_90m_B1_R1.fastq.gz	Fos ChIP-seq	Stimulated (90 min)	1	F	57554980	77.02
B6xPWK_Fos_90m_B1_R2.fastq.gz	Fos ChIP-seq	Stimulated (90 min)	1	R	57554980	78.96
B6xPWK_Fos_90m_B2_R1.fastq.gz	Fos ChIP-seq	Stimulated (90 min)	2	F	95834340	78.22
B6xPWK_Fos_90m_B2_R2.fastq.gz	Fos ChIP-seq	Stimulated (90 min)	2	R	95834340	80.15
B6xPWK_H3K27ac_0m_B1_R1.fastq.gz	H3K27ac ChIP-seq	Serum-starved (26 hr)	1	F	56802764	89.14
B6xPWK_H3K27ac_0m_B1_R2.fastq.gz	H3K27ac ChIP-seq	Serum-starved (26 hr)	1	R	56802764	89.3
B6xPWK_H3K27ac_0m_B2_R1.fastq.gz	H3K27ac ChIP-seq	Serum-starved (26 hr)	2	F	91476905	72.3
B6xPWK_H3K27ac_0m_B2_R2.fastq.gz	H3K27ac ChIP-seq	Serum-starved (26 hr)	2	R	91476905	71.96
B6xPWK_H3K27ac_0m_B3_R1.fastq.gz	H3K27ac ChIP-seq	Serum-starved (26 hr)	3	F	58923597	89.63
B6xPWK_H3K27ac_0m_B3_R2.fastq.gz	H3K27ac ChIP-seq	Serum-starved (26 hr)	3	R	58923597	89.86
B6xPWK_H3K27ac_10m_B1_R1.fastq.gz	H3K27ac ChIP-seq	Stimulated (10 min)	1	F	85803140	82.37
B6xPWK_H3K27ac_10m_B1_R2.fastq.gz	H3K27ac ChIP-seq	Stimulated (10 min)	1	R	85803140	83.12
B6xPWK_H3K27ac_10m_B2_R1.fastq.gz	H3K27ac ChIP-seq	Stimulated (10 min)	2	F	73807202	87.81
B6xPWK_H3K27ac_10m_B2_R2.fastq.gz	H3K27ac ChIP-seq	Stimulated (10 min)	2	R	73807202	88.06
B6xPWK_H3K27ac_90m_B1_R1.fastq.gz	H3K27ac ChIP-seq	Stimulated (90 min)	1	F	47752484	89.43
B6xPWK_H3K27ac_90m_B1_R2.fastq.gz	H3K27ac ChIP-seq	Stimulated (90 min)	1	R	47752484	89.75
B6xPWK_H3K27ac_90m_B2_R1.fastq.gz	H3K27ac ChIP-seq	Stimulated (90 min)	2	F	63892652	88.72
B6xPWK_H3K27ac_90m_B2_R2.fastq.gz	H3K27ac ChIP-seq	Stimulated (90 min)	2	R	63892652	88.97
B6xPWK_H3K27ac_90m_B3_R1.fastq.gz	H3K27ac ChIP-seq	Stimulated (90 min)	3	F	71374254	88.72
B6xPWK_H3K27ac_90m_B3_R2.fastq.gz	H3K27ac ChIP-seq	Stimulated (90 min)	3	R	71374254	89.03
B6xPWK_H3K4me1_0m_B1_R1.fastq.gz	H3K4me1 ChIP-seq	Serum-starved (26 hr)	1	F	91628137	91.79
B6xPWK_H3K4me1_0m_B1_R2.fastq.gz	H3K4me1 ChIP-seq	Serum-starved (26 hr)	1	R	91628137	92.28
B6xPWK_H3K4me1_0m_B2_R1.fastq.gz	H3K4me1 ChIP-seq	Serum-starved (26 hr)	2	F	73240572	94.11
B6xPWK_H3K4me1_0m_B2_R2.fastq.gz	H3K4me1 ChIP-seq	Serum-starved (26 hr)	2	R	73240572	94.3
B6xPWK_H3K4me1_90m_B1_R1.fastq.gz	H3K4me1 ChIP-seq	Stimulated (90 min)	1	F	76171228	87.17
B6xPWK_H3K4me1_90m_B1_R2.fastq.gz	H3K4me1 ChIP-seq	Stimulated (90 min)	1	R	76171228	89.34
B6xPWK_H3K4me1_90m_B2_R1.fastq.gz	H3K4me1 ChIP-seq	Stimulated (90 min)	2	F	66168966	93.78
B6xPWK_H3K4me1_90m_B2_R2.fastq.gz	H3K4me1 ChIP-seq	Stimulated (90 min)	2	R	66168966	94.1
B6xPWK_H3K4me2_cycling_B1_R1.fastq.gz	H3K4me2 ChIP-seq	Cycling	1	F	131520019	86.39
B6xPWK_H3K4me2_cycling_B1_R2.fastq.gz	H3K4me2 ChIP-seq	Cycling	1	R	131520019	86
B6xPWK_H3K4me2_cycling_B2_R1.fastq.gz	H3K4me2 ChIP-seq	Cycling	2	F	143466116	86.16
B6xPWK_H3K4me2_cycling_B2_R2.fastq.gz	H3K4me2 ChIP-seq	Cycling	2	R	143466116	86.12
B6xPWK_H3K4me3_0m_B1_R1.fastq.gz	H3K4me3 ChIP-seq	Serum-starved (26 hr)	1	F	59062922	77.2
B6xPWK_H3K4me3_0m_B1_R2.fastq.gz	H3K4me3 ChIP-seq	Serum-starved (26 hr)	1	R	59062922	78.47
B6xPWK_H3K4me3_0m_B2_R1.fastq.gz	H3K4me3 ChIP-seq	Serum-starved (26 hr)	2	F	57284881	74.37
B6xPWK_H3K4me3_0m_B2_R2.fastq.gz	H3K4me3 ChIP-seq	Serum-starved (26 hr)	2	R	57284881	75.93
B6xPWK_H3K4me3_90m_B1_R1.fastq.gz	H3K4me3 ChIP-seq	Stimulated (90 min)	1	F	66390386	77.31
B6xPWK_H3K4me3_90m_B1_R2.fastq.gz	H3K4me3 ChIP-seq	Stimulated (90 min)	1	R	66390386	78.46
B6xPWK_H3K4me3_90m_B2_R1.fastq.gz	H3K4me3 ChIP-seq	Stimulated (90 min)	2	F	55805572	76.2
B6xPWK_H3K4me3_90m_B2_R2.fastq.gz	H3K4me3 ChIP-seq	Stimulated (90 min)	2	R	55805572	77.56
B6xPWK_input_B1_R1.fastq.gz	Input DNA (from ChIP-seq)	Stimulated (90 min)	1	F	43228978	54.89
B6xPWK_input_B1_R2.fastq.gz	Input DNA (from ChIP-seq)	Stimulated (90 min)	1	R	43228978	56.09
B6xPWK_input_B2_R1.fastq.gz	Input DNA (from ChIP-seq)	Stimulated (90 min)	2	F	42257527	58.76
B6xPWK_input_B2_R2.fastq.gz	Input DNA (from ChIP-seq)	Stimulated (90 min)	2	R	42257527	59.81
B6xPWK_input_B3_R1.fastq.gz	Input DNA (from ChIP-seq)	Stimulated (90 min)	3	F	151767734	84.78
B6xPWK_input_B3_R2.fastq.gz	Input DNA (from ChIP-seq)	Stimulated (90 min)	3	R	151767734	84.57
B6xPWK_input_B4_R1.fastq.gz	Input DNA (from ChIP-seq)	Stimulated (90 min)	4	F	106537186	85.36
B6xPWK_input_B4_R2.fastq.gz	Input DNA (from ChIP-seq)	Stimulated (90 min)	4	R	106537186	85.37
B6xPWK_RNA_0m_B1_R1.fastq.gz	Total RNA-seq	Serum-starved (26 hr)	1	F	14731066	65.22
B6xPWK_RNA_0m_B1_R2.fastq.gz	Total RNA-seq	Serum-starved (26 hr)	1	R	14731066	66.36
B6xPWK_RNA_0m_B2_R1.fastq.gz	Total RNA-seq	Serum-starved (26 hr)	2	F	16696249	58.28
B6xPWK_RNA_0m_B2_R2.fastq.gz	Total RNA-seq	Serum-starved (26 hr)	2	R	16696249	60.23
B6xPWK_RNA_20m_B1_R1.fastq.gz	Total RNA-seq	Stimulated (20 min)	1	F	20132384	62.16
B6xPWK_RNA_20m_B1_R2.fastq.gz	Total RNA-seq	Stimulated (20 min)	1	R	20132384	63.42
B6xPWK_RNA_20m_B2_R1.fastq.gz	Total RNA-seq	Stimulated (20 min)	2	F	18094537	57.44
B6xPWK_RNA_20m_B2_R2.fastq.gz	Total RNA-seq	Stimulated (20 min)	2	R	18094537	58.67
B6xPWK_RNA_90m_B1_R1.fastq.gz	Total RNA-seq	Stimulated (90 min)	1	F	13917447	66.81
B6xPWK_RNA_90m_B1_R2.fastq.gz	Total RNA-seq	Stimulated (90 min)	1	R	13917447	68.93
B6xPWK_RNA_90m_B2_R1.fastq.gz	Total RNA-seq	Stimulated (90 min)	2	F	16056221	54.89
B6xPWK_RNA_90m_B2_R2.fastq.gz	Total RNA-seq	Stimulated (90 min)	2	R	16056221	55.67
B6xPWK_Tead1_0m_B1_R1.fastq.gz	Tead1 ChIP-seq	Serum-starved (26 hr)	1	F	40866548	82.97
B6xPWK_Tead1_0m_B1_R2.fastq.gz	Tead1 ChIP-seq	Serum-starved (26 hr)	1	R	40866548	83.8
B6xPWK_Tead1_0m_B2_R1.fastq.gz	Tead1 ChIP-seq	Serum-starved (26 hr)	2	F	33349336	86.68
B6xPWK_Tead1_0m_B2_R2.fastq.gz	Tead1 ChIP-seq	Serum-starved (26 hr)	2	R	33349336	87.21
B6xPWK_Tead1_90m_B1_R1.fastq.gz	Tead1 ChIP-seq	Stimulated (90 min)	1	F	32919315	86.06
B6xPWK_Tead1_90m_B1_R2.fastq.gz	Tead1 ChIP-seq	Stimulated (90 min)	1	R	32919315	86.31
B6xPWK_Tead1_90m_B2_R1.fastq.gz	Tead1 ChIP-seq	Stimulated (90 min)	2	F	29740339	85.54
B6xPWK_Tead1_90m_B2_R2.fastq.gz	Tead1 ChIP-seq	Stimulated (90 min)	2	R	29740339	86.31
B6xSPRET_CTCF_cycling_B1_R1.fastq.gz	CTCF ChIP-seq	Cycling	1	F	57235486	61.01
B6xSPRET_CTCF_cycling_B1_R2.fastq.gz	CTCF ChIP-seq	Cycling	1	R	57235486	63.56
B6xSPRET_CTCF_cycling_B2_R1.fastq.gz	CTCF ChIP-seq	Cycling	2	F	48081074	72.1
B6xSPRET_CTCF_cycling_B2_R2.fastq.gz	CTCF ChIP-seq	Cycling	2	R	48081074	73.59
B6xSPRET_Fos_0m_B1_R1.fastq.gz	Fos ChIP-seq	Serum-starved (26 hr)	1	F	39037372	75.77
B6xSPRET_Fos_0m_B1_R2.fastq.gz	Fos ChIP-seq	Serum-starved (26 hr)	1	R	39037372	76.59
B6xSPRET_Fos_90m_B1_R1.fastq.gz	Fos ChIP-seq	Stimulated (90 min)	1	F	67989327	81.16
B6xSPRET_Fos_90m_B1_R2.fastq.gz	Fos ChIP-seq	Stimulated (90 min)	1	R	67989327	81.02
B6xSPRET_Fos_90m_B2_R1.fastq.gz	Fos ChIP-seq	Stimulated (90 min)	2	F	102314315	78.46
B6xSPRET_Fos_90m_B2_R2.fastq.gz	Fos ChIP-seq	Stimulated (90 min)	2	R	102314315	80.32
B6xSPRET_H3K27ac_0m_B1_R1.fastq.gz	H3K27ac ChIP-seq	Serum-starved (26 hr)	1	F	68246022	88.09
B6xSPRET_H3K27ac_0m_B1_R2.fastq.gz	H3K27ac ChIP-seq	Serum-starved (26 hr)	1	R	68246022	87.73
B6xSPRET_H3K27ac_0m_B2_R1.fastq.gz	H3K27ac ChIP-seq	Serum-starved (26 hr)	2	F	32160279	91.09
B6xSPRET_H3K27ac_0m_B2_R2.fastq.gz	H3K27ac ChIP-seq	Serum-starved (26 hr)	2	R	32160279	91.28
B6xSPRET_H3K27ac_0m_B3_R1.fastq.gz	H3K27ac ChIP-seq	Serum-starved (26 hr)	3	F	30063987	89.69
B6xSPRET_H3K27ac_0m_B3_R2.fastq.gz	H3K27ac ChIP-seq	Serum-starved (26 hr)	3	R	30063987	89.98
B6xSPRET_H3K27ac_0m_B4_R1.fastq.gz	H3K27ac ChIP-seq	Serum-starved (26 hr)	4	F	55130088	88.63
B6xSPRET_H3K27ac_0m_B4_R2.fastq.gz	H3K27ac ChIP-seq	Serum-starved (26 hr)	4	R	55130088	88.5
B6xSPRET_H3K27ac_10m_B1_R1.fastq.gz	H3K27ac ChIP-seq	Stimulated (10 min)	1	F	59629982	87.7
B6xSPRET_H3K27ac_10m_B1_R2.fastq.gz	H3K27ac ChIP-seq	Stimulated (10 min)	1	R	59629982	87.87
B6xSPRET_H3K27ac_10m_B2_R1.fastq.gz	H3K27ac ChIP-seq	Stimulated (10 min)	2	F	45170968	89.77
B6xSPRET_H3K27ac_10m_B2_R2.fastq.gz	H3K27ac ChIP-seq	Stimulated (10 min)	2	R	45170968	90.37
B6xSPRET_H3K27ac_10m_B3_R1.fastq.gz	H3K27ac ChIP-seq	Stimulated (10 min)	3	F	53874722	88.01
B6xSPRET_H3K27ac_10m_B3_R2.fastq.gz	H3K27ac ChIP-seq	Stimulated (10 min)	3	R	53874722	88.31
B6xSPRET_H3K27ac_90m_B1_R1.fastq.gz	H3K27ac ChIP-seq	Stimulated (90 min)	1	F	50813165	90.01
B6xSPRET_H3K27ac_90m_B1_R2.fastq.gz	H3K27ac ChIP-seq	Stimulated (90 min)	1	R	50813165	90.15
B6xSPRET_H3K27ac_90m_B2_R1.fastq.gz	H3K27ac ChIP-seq	Stimulated (90 min)	2	F	31115460	88.02
B6xSPRET_H3K27ac_90m_B2_R2.fastq.gz	H3K27ac ChIP-seq	Stimulated (90 min)	2	R	31115460	88.73
B6xSPRET_H3K27ac_90m_B3_R1.fastq.gz	H3K27ac ChIP-seq	Stimulated (90 min)	3	F	32304474	90.24
B6xSPRET_H3K27ac_90m_B3_R2.fastq.gz	H3K27ac ChIP-seq	Stimulated (90 min)	3	R	32304474	90.64
B6xSPRET_H3K27ac_90m_B4_R1.fastq.gz	H3K27ac ChIP-seq	Stimulated (90 min)	4	F	39541061	88.88
B6xSPRET_H3K27ac_90m_B4_R2.fastq.gz	H3K27ac ChIP-seq	Stimulated (90 min)	4	R	39541061	89.02
B6xSPRET_H3K4me1_0m_B1_R1.fastq.gz	H3K4me1 ChIP-seq	Serum-starved (26 hr)	1	F	68230395	92.1
B6xSPRET_H3K4me1_0m_B1_R2.fastq.gz	H3K4me1 ChIP-seq	Serum-starved (26 hr)	1	R	68230395	92.51
B6xSPRET_H3K4me1_0m_B2_R1.fastq.gz	H3K4me1 ChIP-seq	Serum-starved (26 hr)	2	F	81803441	94.4
B6xSPRET_H3K4me1_0m_B2_R2.fastq.gz	H3K4me1 ChIP-seq	Serum-starved (26 hr)	2	R	81803441	94.43
B6xSPRET_H3K4me1_90m_B1_R1.fastq.gz	H3K4me1 ChIP-seq	Stimulated (90 min)	1	F	83813287	92.08
B6xSPRET_H3K4me1_90m_B1_R2.fastq.gz	H3K4me1 ChIP-seq	Stimulated (90 min)	1	R	83813287	92.74
B6xSPRET_H3K4me1_90m_B2_R1.fastq.gz	H3K4me1 ChIP-seq	Stimulated (90 min)	2	F	76020113	93.57
B6xSPRET_H3K4me1_90m_B2_R2.fastq.gz	H3K4me1 ChIP-seq	Stimulated (90 min)	2	R	76020113	94.02
B6xSPRET_H3K4me2_cycling_B1_R1.fastq.gz	H3K4me2 ChIP-seq	Cycling	1	F	57297399	91.89
B6xSPRET_H3K4me2_cycling_B1_R2.fastq.gz	H3K4me2 ChIP-seq	Cycling	1	R	57297399	91.82
B6xSPRET_H3K4me2_cycling_B2_R1.fastq.gz	H3K4me2 ChIP-seq	Cycling	2	F	73840986	91.03
B6xSPRET_H3K4me2_cycling_B2_R2.fastq.gz	H3K4me2 ChIP-seq	Cycling	2	R	73840986	90.86
B6xSPRET_H3K4me2_cycling_B3_R1.fastq.gz	H3K4me2 ChIP-seq	Cycling	3	F	60726592	92.08
B6xSPRET_H3K4me2_cycling_B3_R2.fastq.gz	H3K4me2 ChIP-seq	Cycling	3	R	60726592	91.66
B6xSPRET_H3K4me3_0m_B1_R1.fastq.gz	H3K4me3 ChIP-seq	Serum-starved (26 hr)	1	F	71865284	76.77
B6xSPRET_H3K4me3_0m_B1_R2.fastq.gz	H3K4me3 ChIP-seq	Serum-starved (26 hr)	1	R	71865284	78.13
B6xSPRET_H3K4me3_0m_B2_R1.fastq.gz	H3K4me3 ChIP-seq	Serum-starved (26 hr)	2	F	69698843	75.16
B6xSPRET_H3K4me3_0m_B2_R2.fastq.gz	H3K4me3 ChIP-seq	Serum-starved (26 hr)	2	R	69698843	77.02
B6xSPRET_H3K4me3_90m_B1_R1.fastq.gz	H3K4me3 ChIP-seq	Stimulated (90 min)	1	F	63594958	79.1
B6xSPRET_H3K4me3_90m_B1_R2.fastq.gz	H3K4me3 ChIP-seq	Stimulated (90 min)	1	R	63594958	80.39
B6xSPRET_H3K4me3_90m_B2_R1.fastq.gz	H3K4me3 ChIP-seq	Stimulated (90 min)	2	F	55728615	78.18
B6xSPRET_H3K4me3_90m_B2_R2.fastq.gz	H3K4me3 ChIP-seq	Stimulated (90 min)	2	R	55728615	79.96
B6xSPRET_input_B1_R1.fastq.gz	Input DNA (from ChIP-seq)	Stimulated (90 min)	1	F	81206791	61.09
B6xSPRET_input_B1_R2.fastq.gz	Input DNA (from ChIP-seq)	Stimulated (90 min)	1	R	81206791	62.75
B6xSPRET_input_B2_R1.fastq.gz	Input DNA (from ChIP-seq)	Stimulated (90 min)	2	F	69156367	67.93
B6xSPRET_input_B2_R2.fastq.gz	Input DNA (from ChIP-seq)	Stimulated (90 min)	2	R	69156367	69.59
B6xSPRET_input_B3_R1.fastq.gz	Input DNA (from ChIP-seq)	Stimulated (90 min)	3	F	90702540	59.47
B6xSPRET_input_B3_R2.fastq.gz	Input DNA (from ChIP-seq)	Stimulated (90 min)	3	R	90702540	61.57
B6xSPRET_JunD_0m_B1_R1.fastq.gz	JunD ChIP-seq	Serum-starved (26 hr)	1	F	143019893	75.96
B6xSPRET_JunD_0m_B1_R2.fastq.gz	JunD ChIP-seq	Serum-starved (26 hr)	1	R	143019893	78.26
B6xSPRET_JunD_0m_B2_R1.fastq.gz	JunD ChIP-seq	Serum-starved (26 hr)	2	F	158893493	76.85
B6xSPRET_JunD_0m_B2_R2.fastq.gz	JunD ChIP-seq	Serum-starved (26 hr)	2	R	158893493	79.1
B6xSPRET_JunD_90m_B1_R1.fastq.gz	JunD ChIP-seq	Stimulated (90 min)	1	F	116945366	75.98
B6xSPRET_JunD_90m_B1_R2.fastq.gz	JunD ChIP-seq	Stimulated (90 min)	1	R	116945366	78.61
B6xSPRET_JunD_90m_B2_R1.fastq.gz	JunD ChIP-seq	Stimulated (90 min)	2	F	149743020	79.32
B6xSPRET_JunD_90m_B2_R2.fastq.gz	JunD ChIP-seq	Stimulated (90 min)	2	R	149743020	81.5
B6xSPRET_RNA_0m_B1_R1.fastq.gz	Total RNA-seq	Serum-starved (26 hr)	1	F	17765915	58.83
B6xSPRET_RNA_0m_B1_R2.fastq.gz	Total RNA-seq	Serum-starved (26 hr)	1	R	17765915	60.12
B6xSPRET_RNA_0m_B2_R1.fastq.gz	Total RNA-seq	Serum-starved (26 hr)	2	F	14471524	51.76
B6xSPRET_RNA_0m_B2_R2.fastq.gz	Total RNA-seq	Serum-starved (26 hr)	2	R	14471524	52.89
B6xSPRET_RNA_20m_B1_R1.fastq.gz	Total RNA-seq	Stimulated (20 min)	1	F	18283951	61.46
B6xSPRET_RNA_20m_B1_R2.fastq.gz	Total RNA-seq	Stimulated (20 min)	1	R	18283951	62.57
B6xSPRET_RNA_20m_B2_R1.fastq.gz	Total RNA-seq	Stimulated (20 min)	2	F	14173519	51
B6xSPRET_RNA_20m_B2_R2.fastq.gz	Total RNA-seq	Stimulated (20 min)	2	R	14173519	52.49
B6xSPRET_RNA_90m_B1_R1.fastq.gz	Total RNA-seq	Stimulated (90 min)	1	F	17832006	63.01
B6xSPRET_RNA_90m_B1_R2.fastq.gz	Total RNA-seq	Stimulated (90 min)	1	R	17832006	64.96
B6xSPRET_RNA_90m_B2_R1.fastq.gz	Total RNA-seq	Stimulated (90 min)	2	F	16786721	49.77
B6xSPRET_RNA_90m_B2_R2.fastq.gz	Total RNA-seq	Stimulated (90 min)	2	R	16786721	50.85
B6xSPRET_Tead1_0m_B1_R1.fastq.gz	Tead1 ChIP-seq	Serum-starved (26 hr)	1	F	35116014	82.54
B6xSPRET_Tead1_0m_B1_R2.fastq.gz	Tead1 ChIP-seq	Serum-starved (26 hr)	1	R	35116014	83.16
B6xSPRET_Tead1_0m_B2_R1.fastq.gz	Tead1 ChIP-seq	Serum-starved (26 hr)	2	F	33432120	88.1
B6xSPRET_Tead1_0m_B2_R2.fastq.gz	Tead1 ChIP-seq	Serum-starved (26 hr)	2	R	33432120	88.65
B6xSPRET_Tead1_90m_B1_R1.fastq.gz	Tead1 ChIP-seq	Stimulated (90 min)	1	F	39719592	82.87
B6xSPRET_Tead1_90m_B1_R2.fastq.gz	Tead1 ChIP-seq	Stimulated (90 min)	1	R	39719592	83.72
B6xSPRET_Tead1_90m_B2_R1.fastq.gz	Tead1 ChIP-seq	Stimulated (90 min)	2	F	35863675	87.78
B6xSPRET_Tead1_90m_B2_R2.fastq.gz	Tead1 ChIP-seq	Stimulated (90 min)	2	R	35863675	88.22
CAST_ATAC_0m_B1_R1.fastq.gz	ATAC-seq	Serum-starved (26 hr)	1	F	33362238	62.98
CAST_ATAC_0m_B2_R1.fastq.gz	ATAC-seq	Serum-starved (26 hr)	2	F	9854992	72.65
CAST_ATAC_10m_B1_R1.fastq.gz	ATAC-seq	Stimulated (10 min)	1	F	34639266	40.97
CAST_ATAC_10m_B2_R1.fastq.gz	ATAC-seq	Stimulated (10 min)	2	F	44763138	57
CAST_ATAC_90m_B1_R1.fastq.gz	ATAC-seq	Stimulated (90 min)	1	F	40845835	49.83
CAST_ATAC_90m_B2_R1.fastq.gz	ATAC-seq	Stimulated (90 min)	2	F	31631773	59.25
PWK_ATAC_0m_B1_R1.fastq.gz	ATAC-seq	Serum-starved (26 hr)	1	F	54127351	48.81
PWK_ATAC_0m_B2_R1.fastq.gz	ATAC-seq	Serum-starved (26 hr)	2	F	34463498	53.94
PWK_ATAC_10m_B1_R1.fastq.gz	ATAC-seq	Stimulated (10 min)	1	F	59554094	45.52
PWK_ATAC_10m_B2_R1.fastq.gz	ATAC-seq	Stimulated (10 min)	2	F	38037725	52.64
PWK_ATAC_90m_B1_R1.fastq.gz	ATAC-seq	Stimulated (90 min)	1	F	71403197	56.62
PWK_ATAC_90m_B2_R1.fastq.gz	ATAC-seq	Stimulated (90 min)	2	F	37462136	58.91
SPRET_ATAC_0m_B1_R1.fastq.gz	ATAC-seq	Serum-starved (26 hr)	1	F	24094727	65.06
SPRET_ATAC_0m_B2_R1.fastq.gz	ATAC-seq	Serum-starved (26 hr)	2	F	272643170	36.06
SPRET_ATAC_0m_B2_R2.fastq.gz	ATAC-seq	Serum-starved (26 hr)	2	R	196001228	42.2
SPRET_ATAC_10m_B1_R1.fastq.gz	ATAC-seq	Stimulated (10 min)	1	F	36082725	57.8
SPRET_ATAC_10m_B2_R1.fastq.gz	ATAC-seq	Stimulated (10 min)	2	F	270049997	39.5
SPRET_ATAC_10m_B2_R2.fastq.gz	ATAC-seq	Stimulated (10 min)	2	R	184705793	45.78
SPRET_ATAC_90m_B1_R1.fastq.gz	ATAC-seq	Stimulated (90 min)	1	F	24152901	63.04
SPRET_ATAC_90m_B2_R1.fastq.gz	ATAC-seq	Stimulated (90 min)	2	F	326032364	39.13
SPRET_ATAC_90m_B2_R2.fastq.gz	ATAC-seq	Stimulated (90 min)	2	R	232511660	43.72
