# Supplementary material for: Characterization of sequence determinants of enhancer function using natural genetic variation
Source: eLife. 2022 Aug 31;11:e76500. doi: 10.7554/eLife.76500 (PMC9662815; doi:10.7554/eLife.76500)
Supplement: Supplementary file 3. — Only intra-chromosomal loops with at least 10 paired-end reads connecting them per bioreplicate were retained for analysis. [file elife-76500-supp3.xlsx]

## Sheet: Sheet1
ATAC summit (left anchor)	ATAC summit (right anchor)
chr1:6214660-6214661	chr1:4857627-4857628
chr1:6280273-6280274	chr1:6214660-6214661
chr1:6288784-6288785	chr1:6214660-6214661
chr1:6307394-6307395	chr1:6280273-6280274
chr1:6288784-6288785	chr1:6214660-6214661
chr1:6307394-6307395	chr1:6280273-6280274
chr1:6307394-6307395	chr1:6288784-6288785
chr1:10721278-10721279	chr1:10233535-10233536
chr1:16104675-16104676	chr1:15805352-15805353
chr1:16657038-16657039	chr1:16104675-16104676
chr1:16688464-16688465	chr1:16619416-16619417
chr1:16657038-16657039	chr1:16657038-16657039
chr1:16665118-16665119	chr1:16104675-16104676
chr1:16688464-16688465	chr1:16657038-16657039
chr1:17602506-17602507	chr1:17489675-17489676
chr1:21041358-21041359	chr1:21014942-21014943
chr1:21075888-21075889	chr1:21041358-21041359
chr1:30949930-30949931	chr1:30874060-30874061
chr1:31095981-31095982	chr1:30949930-30949931
chr1:34439324-34439325	chr1:34434222-34434223
chr1:34850832-34850833	chr1:34439324-34439325
chr1:34850832-34850833	chr1:34842844-34842845
chr1:36007762-36007763	chr1:34850832-34850833
chr1:36457332-36457333	chr1:36445361-36445362
chr1:36556757-36556758	chr1:36547667-36547668
chr1:37871998-37871999	chr1:37430645-37430646
chr1:37871998-37871999	chr1:37864445-37864446
chr1:37998136-37998137	chr1:37871998-37871999
chr1:39367990-39367991	chr1:38988144-38988145
chr1:39869332-39869333	chr1:39760854-39760855
chr1:39889619-39889620	chr1:39760854-39760855
chr1:40234579-40234580	chr1:40173234-40173235
chr1:40359088-40359089	chr1:40234579-40234580
chr1:40444973-40444974	chr1:40436163-40436164
chr1:43099404-43099405	chr1:43092759-43092760
chr1:43164152-43164153	chr1:43147880-43147881
chr1:43224549-43224550	chr1:43164152-43164153
chr1:43224549-43224550	chr1:43168778-43168779
chr1:44567729-44567730	chr1:44552193-44552194
chr1:45542028-45542029	chr1:45502991-45502992
chr1:45580816-45580817	chr1:45502991-45502992
chr1:45597502-45597503	chr1:45502991-45502992
chr1:45626332-45626333	chr1:45502991-45502992
chr1:45761243-45761244	chr1:45502991-45502992
chr1:45765783-45765784	chr1:45756597-45756598
chr1:46865200-46865201	chr1:46853477-46853478
chr1:47399025-47399026	chr1:46853477-46853478
chr1:51478678-51478679	chr1:51119858-51119859
chr1:51595401-51595402	chr1:51478678-51478679
chr1:52119836-52119837	chr1:52113660-52113661
chr1:52254666-52254667	chr1:52233456-52233457
chr1:55051702-55051703	chr1:55027487-55027488
chr1:55088024-55088025	chr1:55051702-55051703
chr1:58445610-58445611	chr1:58423730-58423731
chr1:58726410-58726411	chr1:58663753-58663754
chr1:58742542-58742543	chr1:58726410-58726411
chr1:58761323-58761324	chr1:58726410-58726411
chr1:59119753-59119754	chr1:58761323-58761324
chr1:59162577-59162578	chr1:59119753-59119754
chr1:59684874-59684875	chr1:59457497-59457498
chr1:59684874-59684875	chr1:59481802-59481803
chr1:59481802-59481803	chr1:59481802-59481803
chr1:59580172-59580173	chr1:59119753-59119754
chr1:59610188-59610189	chr1:59237147-59237148
chr1:60180527-60180528	chr1:59763627-59763628
chr1:60825239-60825240	chr1:60343448-60343449
chr1:60825239-60825240	chr1:60566531-60566532
chr1:62704985-62704986	chr1:62446545-62446546
chr1:62551258-62551259	chr1:62091837-62091838
chr1:62704985-62704986	chr1:62446545-62446546
chr1:62704985-62704986	chr1:62551258-62551259
chr1:62721004-62721005	chr1:62704985-62704986
chr1:64120384-64120385	chr1:63554583-63554584
chr1:64532671-64532672	chr1:63730464-63730465
chr1:64120384-64120385	chr1:63777052-63777053
chr1:64532671-64532672	chr1:64005352-64005353
chr1:64120384-64120385	chr1:64120384-64120385
chr1:64532671-64532672	chr1:64120384-64120385
chr1:64120384-64120385	chr1:64120384-64120385
chr1:64226259-64226260	chr1:63554583-63554584
chr1:64301247-64301248	chr1:63730464-63730465
chr1:64306006-64306007	chr1:63777052-63777053
chr1:64532671-64532672	chr1:64120384-64120385
chr1:64616440-64616441	chr1:64120384-64120385
chr1:64622914-64622915	chr1:64532671-64532672
chr1:65178367-65178368	chr1:64120384-64120385
chr1:64616440-64616441	chr1:64532671-64532672
chr1:64622914-64622915	chr1:64616440-64616441
chr1:64957188-64957189	chr1:64622914-64622915
chr1:65178367-65178368	chr1:64532671-64532672
chr1:64622914-64622915	chr1:64120384-64120385
chr1:64667375-64667376	chr1:64532671-64532672
chr1:65186577-65186578	chr1:65178367-65178368
chr1:71557313-71557314	chr1:71004577-71004578
chr1:71971300-71971301	chr1:71653389-71653390
chr1:72080146-72080147	chr1:71653389-71653390
chr1:71752607-71752608	chr1:71653389-71653390
chr1:71755615-71755616	chr1:71752607-71752608
chr1:71765557-71765558	chr1:71755615-71755616
chr1:71865642-71865643	chr1:71653389-71653390
chr1:71893828-71893829	chr1:71752607-71752608
chr1:71971300-71971301	chr1:71755615-71755616
chr1:72003063-72003064	chr1:71765557-71765558
chr1:72013836-72013837	chr1:71653389-71653390
chr1:72071043-72071044	chr1:71557313-71557314
chr1:72080146-72080147	chr1:71653389-71653390
chr1:72109077-72109078	chr1:71755615-71755616
chr1:71765557-71765558	chr1:71765557-71765558
chr1:71865642-71865643	chr1:71865642-71865643
chr1:72071043-72071044	chr1:71971300-71971301
chr1:71765557-71765558	chr1:71653389-71653390
chr1:71865642-71865643	chr1:71653389-71653390
chr1:71971300-71971301	chr1:71653389-71653390
chr1:72071043-72071044	chr1:71752607-71752608
chr1:72080146-72080147	chr1:71755615-71755616
chr1:71865642-71865643	chr1:71765557-71765558
chr1:71971300-71971301	chr1:71557313-71557314
chr1:72071043-72071044	chr1:71653389-71653390
chr1:71971300-71971301	chr1:71755615-71755616
chr1:71977641-71977642	chr1:71653389-71653390
chr1:72582964-72582965	chr1:72307642-72307643
chr1:74008819-74008820	chr1:73996950-73996951
chr1:74016139-74016140	chr1:73996950-73996951
chr1:74028400-74028401	chr1:74008819-74008820
chr1:74092558-74092559	chr1:73996950-73996951
chr1:74016139-74016140	chr1:74008819-74008820
chr1:74028400-74028401	chr1:74016139-74016140
chr1:74028400-74028401	chr1:74028400-74028401
chr1:74066060-74066061	chr1:74028400-74028401
chr1:74070550-74070551	chr1:73996950-73996951
chr1:74296398-74296399	chr1:74236295-74236296
chr1:74249711-74249712	chr1:74236295-74236296
chr1:74284945-74284946	chr1:74028400-74028401
chr1:74296398-74296399	chr1:74236295-74236296
chr1:74304362-74304363	chr1:74284945-74284946
chr1:74391850-74391851	chr1:74236295-74236296
chr1:74296398-74296399	chr1:74284945-74284946
chr1:74304362-74304363	chr1:74296398-74296399
chr1:74391850-74391851	chr1:74236295-74236296
chr1:74304362-74304363	chr1:74284945-74284946
chr1:74391850-74391851	chr1:74296398-74296399
chr1:74391850-74391851	chr1:74304362-74304363
chr1:74397378-74397379	chr1:74391850-74391851
chr1:74601207-74601208	chr1:74588216-74588217
chr1:74661439-74661440	chr1:74601207-74601208
chr1:75142488-75142489	chr1:75124780-75124781
chr1:75168069-75168070	chr1:75142488-75142489
chr1:75192159-75192160	chr1:75142488-75142489
chr1:75192159-75192160	chr1:75168069-75168070
chr1:75210657-75210658	chr1:75192159-75192160
chr1:75317604-75317605	chr1:75293227-75293228
chr1:75394038-75394039	chr1:75347261-75347262
chr1:75399054-75399055	chr1:75394038-75394039
chr1:79753911-79753912	chr1:79746445-79746446
chr1:79760807-79760808	chr1:79746445-79746446
chr1:79760807-79760808	chr1:79753911-79753912
chr1:80341113-80341114	chr1:79760807-79760808
chr1:82292084-82292085	chr1:81739331-81739332
chr1:82292084-82292085	chr1:81913486-81913487
chr1:82292084-82292085	chr1:81953847-81953848
chr1:84285214-84285215	chr1:83851355-83851356
chr1:84839576-84839577	chr1:84406106-84406107
chr1:86438669-86438670	chr1:86359451-86359452
chr1:86448152-86448153	chr1:86438669-86438670
chr1:86471659-86471660	chr1:86438669-86438670
chr1:86503331-86503332	chr1:86438669-86438670
chr1:86526620-86526621	chr1:86438669-86438670
chr1:86582616-86582617	chr1:86503331-86503332
chr1:87180956-87180957	chr1:86438669-86438670
chr1:87213777-87213778	chr1:86438669-86438670
chr1:86526620-86526621	chr1:86582616-86582617
chr1:87180956-87180957	chr1:86622581-86622582
chr1:87180956-87180957	chr1:87180956-87180957
chr1:87187069-87187070	chr1:86438669-86438670
chr1:88526237-88526238	chr1:88474799-88474800
chr1:88534267-88534268	chr1:88474799-88474800
chr1:89070016-89070017	chr1:88994961-88994962
chr1:89081173-89081174	chr1:89070016-89070017
chr1:89123266-89123267	chr1:89070016-89070017
chr1:89455849-89455850	chr1:89070016-89070017
chr1:90051251-90051252	chr1:89656259-89656260
chr1:90603503-90603504	chr1:90051251-90051252
chr1:90603503-90603504	chr1:90226024-90226025
chr1:90669131-90669132	chr1:90663223-90663224
chr1:90835367-90835368	chr1:90744348-90744349
chr1:90750565-90750566	chr1:90669131-90669132
chr1:91025139-91025140	chr1:90974459-90974460
chr1:91051883-91051884	chr1:90974459-90974460
chr1:91218200-91218201	chr1:91025139-91025140
chr1:91051883-91051884	chr1:91051883-91051884
chr1:91218200-91218201	chr1:90974459-90974460
chr1:91087473-91087474	chr1:91025139-91025140
chr1:91218200-91218201	chr1:91051883-91051884
chr1:91250115-91250116	chr1:91218200-91218201
chr1:91695068-91695069	chr1:91669751-91669752
chr1:91801455-91801456	chr1:91669751-91669752
chr1:91801455-91801456	chr1:91695068-91695069
chr1:91816723-91816724	chr1:91801455-91801456
chr1:91822106-91822107	chr1:91801455-91801456
chr1:91822106-91822107	chr1:91816723-91816724
chr1:93478804-93478805	chr1:93175304-93175305
chr1:93511903-93511904	chr1:93444783-93444784
chr1:93478804-93478805	chr1:93175304-93175305
chr1:93511903-93511904	chr1:93478804-93478805
chr1:105991993-105991994	chr1:105663103-105663104
chr1:105991993-105991994	chr1:105984096-105984097
chr1:106408024-106408025	chr1:106171443-106171444
chr1:106210964-106210965	chr1:106171443-106171444
chr1:106400716-106400717	chr1:105991993-105991994
chr1:106408024-106408025	chr1:106171443-106171444
chr1:106408024-106408025	chr1:106400716-106400717
chr1:106759833-106759834	chr1:106408024-106408025
chr1:106796868-106796869	chr1:106408024-106408025
chr1:106796868-106796869	chr1:106759833-106759834
chr1:118388596-118388597	chr1:118369502-118369503
chr1:120136415-120136416	chr1:120120771-120120772
chr1:120758426-120758427	chr1:120120771-120120772
chr1:121396318-121396319	chr1:120602411-120602412
chr1:121431053-121431054	chr1:120602411-120602412
chr1:120758426-120758427	chr1:120758426-120758427
chr1:121013685-121013686	chr1:120758426-120758427
chr1:121327360-121327361	chr1:120602411-120602412
chr1:121360804-121360805	chr1:120758426-120758427
chr1:121379952-121379953	chr1:120602411-120602412
chr1:121396318-121396319	chr1:120758426-120758427
chr1:121431053-121431054	chr1:120602411-120602412
chr1:121013685-121013686	chr1:120758426-120758427
chr1:121112039-121112040	chr1:120120771-120120772
chr1:121327360-121327361	chr1:120602411-120602412
chr1:121360804-121360805	chr1:120758426-120758427
chr1:121379952-121379953	chr1:121013685-121013686
chr1:121396318-121396319	chr1:121327360-121327361
chr1:121431053-121431054	chr1:121379952-121379953
chr1:121396318-121396319	chr1:120120771-120120772
chr1:121396318-121396319	chr1:120602411-120602412
chr1:121396318-121396319	chr1:120758426-120758427
chr1:125450860-125450861	chr1:125435746-125435747
chr1:125458703-125458704	chr1:125435746-125435747
chr1:125508404-125508405	chr1:125435746-125435747
chr1:125560950-125560951	chr1:125435746-125435747
chr1:127773863-127773864	chr1:127204805-127204806
chr1:128824649-128824650	chr1:128358856-128358857
chr1:128824649-128824650	chr1:128398881-128398882
chr1:128824649-128824650	chr1:128416664-128416665
chr1:128824649-128824650	chr1:128472348-128472349
chr1:131097248-131097249	chr1:131084448-131084449
chr1:131108113-131108114	chr1:131097248-131097249
chr1:131112716-131112717	chr1:131097248-131097249
chr1:131125210-131125211	chr1:131097248-131097249
chr1:131138357-131138358	chr1:131097248-131097249
chr1:131527865-131527866	chr1:131125210-131125211
chr1:131138357-131138358	chr1:131097248-131097249
chr1:132294549-132294550	chr1:132006994-132006995
chr1:132335700-132335701	chr1:132287643-132287644
chr1:132346533-132346534	chr1:132006994-132006995
chr1:132354792-132354793	chr1:132294549-132294550
chr1:132294549-132294550	chr1:132006994-132006995
chr1:132335700-132335701	chr1:132294549-132294550
chr1:132346533-132346534	chr1:132335700-132335701
chr1:132346533-132346534	chr1:132006994-132006995
chr1:132354792-132354793	chr1:132335700-132335701
chr1:132354792-132354793	chr1:132346533-132346534
chr1:134101643-134101644	chr1:134079280-134079281
chr1:134101643-134101644	chr1:133661200-133661201
chr1:134101643-134101644	chr1:133695854-133695855
chr1:134101643-134101644	chr1:133744852-133744853
chr1:134101643-134101644	chr1:133952009-133952010
chr1:134101643-134101644	chr1:133960814-133960815
chr1:134086820-134086821	chr1:134060997-134060998
chr1:134101643-134101644	chr1:134079280-134079281
chr1:134101643-134101644	chr1:134082947-134082948
chr1:134101643-134101644	chr1:134086820-134086821
chr1:134405937-134405938	chr1:134101643-134101644
chr1:134415570-134415571	chr1:134361917-134361918
chr1:134494703-134494704	chr1:134101643-134101644
chr1:134405937-134405938	chr1:134361917-134361918
chr1:134415570-134415571	chr1:134405937-134405938
chr1:134415570-134415571	chr1:134101643-134101644
chr1:134494703-134494704	chr1:134415570-134415571
chr1:134909634-134909635	chr1:134902362-134902363
chr1:135147664-135147665	chr1:135021101-135021102
chr1:135368185-135368186	chr1:135313746-135313747
chr1:135325202-135325203	chr1:135313746-135313747
chr1:135341617-135341618	chr1:135313746-135313747
chr1:135348259-135348260	chr1:135313746-135313747
chr1:135359278-135359279	chr1:135147664-135147665
chr1:135368185-135368186	chr1:135313746-135313747
chr1:135765982-135765983	chr1:135341617-135341618
chr1:135368185-135368186	chr1:135359278-135359279
chr1:135368185-135368186	chr1:135368185-135368186
chr1:135375152-135375153	chr1:135368185-135368186
chr1:135727603-135727604	chr1:135727603-135727604
chr1:135765982-135765983	chr1:135727603-135727604
chr1:135765982-135765983	chr1:135727603-135727604
chr1:135733179-135733180	chr1:135727603-135727604
chr1:135744031-135744032	chr1:135313746-135313747
chr1:135755392-135755393	chr1:135368185-135368186
chr1:135759519-135759520	chr1:135411289-135411290
chr1:135765982-135765983	chr1:135727603-135727604
chr1:135771220-135771221	chr1:135733179-135733180
chr1:135765982-135765983	chr1:135744031-135744032
chr1:135765982-135765983	chr1:135755392-135755393
chr1:135765982-135765983	chr1:135759519-135759520
chr1:135771220-135771221	chr1:135727603-135727604
chr1:135765982-135765983	chr1:135755392-135755393
chr1:135771220-135771221	chr1:135759519-135759520
chr1:135771220-135771221	chr1:135765982-135765983
chr1:136129460-136129461	chr1:135765982-135765983
chr1:136136539-136136540	chr1:136129460-136129461
chr1:136140247-136140248	chr1:136129460-136129461
chr1:136696544-136696545	chr1:136684004-136684005
chr1:138617887-138617888	chr1:138329565-138329566
chr1:138617887-138617888	chr1:138343419-138343420
chr1:138623344-138623345	chr1:138617887-138617888
chr1:150251353-150251354	chr1:149834989-149834990
chr1:150260222-150260223	chr1:149834989-149834990
chr1:149846750-149846751	chr1:149834989-149834990
chr1:149857046-149857047	chr1:149857046-149857047
chr1:149862859-149862860	chr1:149834989-149834990
chr1:149898464-149898465	chr1:149857046-149857047
chr1:149902255-149902256	chr1:149834989-149834990
chr1:150043329-150043330	chr1:149857046-149857047
chr1:150100122-150100123	chr1:149834989-149834990
chr1:150130484-150130485	chr1:149902255-149902256
chr1:150218656-150218657	chr1:149834989-149834990
chr1:150251353-150251354	chr1:149857046-149857047
chr1:150260222-150260223	chr1:149867475-149867476
chr1:150393193-150393194	chr1:149891372-149891373
chr1:150251353-150251354	chr1:149898464-149898465
chr1:150260222-150260223	chr1:149902255-149902256
chr1:149862859-149862860	chr1:150043329-150043330
chr1:149898464-149898465	chr1:149834989-149834990
chr1:149902255-149902256	chr1:149834989-149834990
chr1:150100122-150100123	chr1:149862859-149862860
chr1:150251353-150251354	chr1:149814154-149814155
chr1:150260222-150260223	chr1:149834989-149834990
chr1:150218656-150218657	chr1:149846750-149846751
chr1:150251353-150251354	chr1:149857046-149857047
chr1:150260222-150260223	chr1:149862859-149862860
chr1:150100122-150100123	chr1:149867475-149867476
chr1:150251353-150251354	chr1:149891372-149891373
chr1:150260222-150260223	chr1:149898464-149898465
chr1:150100122-150100123	chr1:149902255-149902256
chr1:150251353-150251354	chr1:149814154-149814155
chr1:150260222-150260223	chr1:149834989-149834990
chr1:150100122-150100123	chr1:149846750-149846751
chr1:150251353-150251354	chr1:149857046-149857047
chr1:150260222-150260223	chr1:149862859-149862860
chr1:150043329-150043330	chr1:149867475-149867476
chr1:150100122-150100123	chr1:149891372-149891373
chr1:150251353-150251354	chr1:149898464-149898465
chr1:150260222-150260223	chr1:149902255-149902256
chr1:150100122-150100123	chr1:149834989-149834990
chr1:151677996-151677997	chr1:151663235-151663236
chr1:151684316-151684317	chr1:151677996-151677997
chr1:153130357-153130358	chr1:153120711-153120712
chr1:153130357-153130358	chr1:152767397-152767398
chr1:153332893-153332894	chr1:152903899-152903900
chr1:153332893-153332894	chr1:153049283-153049284
chr1:153130357-153130358	chr1:153120711-153120712
chr1:153332893-153332894	chr1:152903899-152903900
chr1:153126772-153126773	chr1:152921808-152921809
chr1:153130357-153130358	chr1:153049283-153049284
chr1:153332893-153332894	chr1:153120711-153120712
chr1:153332893-153332894	chr1:153126772-153126773
chr1:153332893-153332894	chr1:153130357-153130358
chr1:153332893-153332894	chr1:153265985-153265986
chr1:153332893-153332894	chr1:153292933-153292934
chr1:153736418-153736419	chr1:153565888-153565889
chr1:155051619-155051620	chr1:155040486-155040487
chr1:155092646-155092647	chr1:155051619-155051620
chr1:155099562-155099563	chr1:155051619-155051620
chr1:155213840-155213841	chr1:155051619-155051620
chr1:155076046-155076047	chr1:155040486-155040487
chr1:155083612-155083613	chr1:155051619-155051620
chr1:155087266-155087267	chr1:155083612-155083613
chr1:155092646-155092647	chr1:155087266-155087267
chr1:155099562-155099563	chr1:155040486-155040487
chr1:155109321-155109322	chr1:155051619-155051620
chr1:155139114-155139115	chr1:155056201-155056202
chr1:155158691-155158692	chr1:155083612-155083613
chr1:155213840-155213841	chr1:155087266-155087267
chr1:155224370-155224371	chr1:155092646-155092647
chr1:155099562-155099563	chr1:155051619-155051620
chr1:155213840-155213841	chr1:155099562-155099563
chr1:155092646-155092647	chr1:155051619-155051620
chr1:155099562-155099563	chr1:155099562-155099563
chr1:155213840-155213841	chr1:155051619-155051620
chr1:155092646-155092647	chr1:155099562-155099563
chr1:155099562-155099563	chr1:155040486-155040487
chr1:155213840-155213841	chr1:155051619-155051620
chr1:155099562-155099563	chr1:155056201-155056202
chr1:155213840-155213841	chr1:155083612-155083613
chr1:155109321-155109322	chr1:155087266-155087267
chr1:155139114-155139115	chr1:155092646-155092647
chr1:155158691-155158692	chr1:155099562-155099563
chr1:155213840-155213841	chr1:155109321-155109322
chr1:155213840-155213841	chr1:155139114-155139115
chr1:155213840-155213841	chr1:155158691-155158692
chr1:155213840-155213841	chr1:155051619-155051620
chr1:160176983-160176984	chr1:160100940-160100941
chr1:160212806-160212807	chr1:160195438-160195439
chr1:161735304-161735305	chr1:161251169-161251170
chr1:162018594-162018595	chr1:161969340-161969341
chr1:162217331-162217332	chr1:161980126-161980127
chr1:162313702-162313703	chr1:162004078-162004079
chr1:162570696-162570697	chr1:162018594-162018595
chr1:162018594-162018595	chr1:162004078-162004079
chr1:162018594-162018595	chr1:162018594-162018595
chr1:162076002-162076003	chr1:162037922-162037923
chr1:162094701-162094702	chr1:162004078-162004079
chr1:162133725-162133726	chr1:162018594-162018595
chr1:162183985-162183986	chr1:162076002-162076003
chr1:162217331-162217332	chr1:162004078-162004079
chr1:162225283-162225284	chr1:162018594-162018595
chr1:162313702-162313703	chr1:162076002-162076003
chr1:162037922-162037923	chr1:162094701-162094702
chr1:162076002-162076003	chr1:162004078-162004079
chr1:162094701-162094702	chr1:162018594-162018595
chr1:162133725-162133726	chr1:162076002-162076003
chr1:162183985-162183986	chr1:162094701-162094702
chr1:162188042-162188043	chr1:162133725-162133726
chr1:162217331-162217332	chr1:162018594-162018595
chr1:162225283-162225284	chr1:162076002-162076003
chr1:162243652-162243653	chr1:161969340-161969341
chr1:162300030-162300031	chr1:162004078-162004079
chr1:162313702-162313703	chr1:162018594-162018595
chr1:162076002-162076003	chr1:162037922-162037923
chr1:162217331-162217332	chr1:162076002-162076003
chr1:162094701-162094702	chr1:162094701-162094702
chr1:162133725-162133726	chr1:162133725-162133726
chr1:162183985-162183986	chr1:162183985-162183986
chr1:162188042-162188043	chr1:162188042-162188043
chr1:162217331-162217332	chr1:162004078-162004079
chr1:162225283-162225284	chr1:162018594-162018595
chr1:162243652-162243653	chr1:162076002-162076003
chr1:162313702-162313703	chr1:162094701-162094702
chr1:162133725-162133726	chr1:162133725-162133726
chr1:162183985-162183986	chr1:162183985-162183986
chr1:162217331-162217332	chr1:162217331-162217332
chr1:162225283-162225284	chr1:162018594-162018595
chr1:162183985-162183986	chr1:162076002-162076003
chr1:162217331-162217332	chr1:162217331-162217332
chr1:162225283-162225284	chr1:162225283-162225284
chr1:162217331-162217332	chr1:162018594-162018595
chr1:162225283-162225284	chr1:161969340-161969341
chr1:162217331-162217332	chr1:162004078-162004079
chr1:162225283-162225284	chr1:162018594-162018595
chr1:162243652-162243653	chr1:162076002-162076003
chr1:162313702-162313703	chr1:162217331-162217332
chr1:162243652-162243653	chr1:162225283-162225284
chr1:162313702-162313703	chr1:161969340-161969341
chr1:163383118-163383119	chr1:163362386-163362387
chr1:164993383-164993384	chr1:164307494-164307495
chr1:165642199-165642200	chr1:165461493-165461494
chr1:165642199-165642200	chr1:165634562-165634563
chr1:166046645-166046646	chr1:165642199-165642200
chr1:166378990-166378991	chr1:165642199-165642200
chr1:166378990-166378991	chr1:166046645-166046646
chr1:167270142-167270143	chr1:167246973-167246974
chr1:167270142-167270143	chr1:167251853-167251854
chr1:167270142-167270143	chr1:167259778-167259779
chr1:167279352-167279353	chr1:167270142-167270143
chr1:167284818-167284819	chr1:167270142-167270143
chr1:167308224-167308225	chr1:167279352-167279353
chr1:167284818-167284819	chr1:167270142-167270143
chr1:169166548-169166549	chr1:168432445-168432446
chr1:170110889-170110890	chr1:169968982-169968983
chr1:170110889-170110890	chr1:170058026-170058027
chr1:170058026-170058027	chr1:169531620-169531621
chr1:170110889-170110890	chr1:169699490-169699491
chr1:170175314-170175315	chr1:169968982-169968983
chr1:170063942-170063943	chr1:170058026-170058027
chr1:170110889-170110890	chr1:170063942-170063943
chr1:170175314-170175315	chr1:170110889-170110890
chr1:170110889-170110890	chr1:169968982-169968983
chr1:170136147-170136148	chr1:170058026-170058027
chr1:170175314-170175315	chr1:170110889-170110890
chr1:170188762-170188763	chr1:170175314-170175315
chr1:170853795-170853796	chr1:170175314-170175315
chr1:170867964-170867965	chr1:170175314-170175315
chr1:170867964-170867965	chr1:170853795-170853796
chr1:170885463-170885464	chr1:170867964-170867965
chr1:171113382-171113383	chr1:171102806-171102807
chr1:171222593-171222594	chr1:171113382-171113383
chr1:171249135-171249136	chr1:171113382-171113383
chr1:171262948-171262949	chr1:171113382-171113383
chr1:171345521-171345522	chr1:171249135-171249136
chr1:171262948-171262949	chr1:171249135-171249136
chr1:171270193-171270194	chr1:171262948-171262949
chr1:171287965-171287966	chr1:171249135-171249136
chr1:171270193-171270194	chr1:171262948-171262949
chr1:171287965-171287966	chr1:171113382-171113383
chr1:171410785-171410786	chr1:171360911-171360912
chr1:172133368-172133369	chr1:172126306-172126307
chr1:172148081-172148082	chr1:172126306-172126307
chr1:172311615-172311616	chr1:172133368-172133369
chr1:172148081-172148082	chr1:172126306-172126307
chr1:172311615-172311616	chr1:172148081-172148082
chr1:172311615-172311616	chr1:172205437-172205438
chr1:172501797-172501798	chr1:172423434-172423435
chr1:172507466-172507467	chr1:172501797-172501798
chr1:174649257-174649258	chr1:174642603-174642604
chr1:174654946-174654947	chr1:174642603-174642604
chr1:174882792-174882793	chr1:174642603-174642604
chr1:174920663-174920664	chr1:174642603-174642604
chr1:174972020-174972021	chr1:174649257-174649258
chr1:175028990-175028991	chr1:174654946-174654947
chr1:175033074-175033075	chr1:174642603-174642604
chr1:174920663-174920664	chr1:174642603-174642604
chr1:174920663-174920664	chr1:174642603-174642604
chr1:176827687-176827688	chr1:176816623-176816624
chr1:176832829-176832830	chr1:176816623-176816624
chr1:176832829-176832830	chr1:176827687-176827688
chr1:177796490-177796491	chr1:177710417-177710418
chr1:178336534-178336535	chr1:178319366-178319367
chr1:178368807-178368808	chr1:178336534-178336535
chr1:178401048-178401049	chr1:178336534-178336535
chr1:178405767-178405768	chr1:178336534-178336535
chr1:178405767-178405768	chr1:178368807-178368808
chr1:179061254-179061255	chr1:179042089-179042090
chr1:179047316-179047317	chr1:178530631-178530632
chr1:179061254-179061255	chr1:179042089-179042090
chr1:179061254-179061255	chr1:179047316-179047317
chr1:179477528-179477529	chr1:179061254-179061255
chr1:179076430-179076431	chr1:179047316-179047317
chr1:179477528-179477529	chr1:179061254-179061255
chr1:179572258-179572259	chr1:179546397-179546398
chr1:179847999-179848000	chr1:179803745-179803746
chr1:180849644-180849645	chr1:180777957-180777958
chr1:180914261-180914262	chr1:180904339-180904340
chr1:180942491-180942492	chr1:180904339-180904340
chr1:181016338-181016339	chr1:180904339-180904340
chr1:182341000-182341001	chr1:182021796-182021797
chr1:182027495-182027496	chr1:182027495-182027496
chr1:182091316-182091317	chr1:182021796-182021797
chr1:182059204-182059205	chr1:181842524-181842525
chr1:182514583-182514584	chr1:182341000-182341001
chr1:182520260-182520261	chr1:182341000-182341001
chr1:182514583-182514584	chr1:182489680-182489681
chr1:182514583-182514584	chr1:182027495-182027496
chr1:182520260-182520261	chr1:182059204-182059205
chr1:182514583-182514584	chr1:182091316-182091317
chr1:182520260-182520261	chr1:182125013-182125014
chr1:182363335-182363336	chr1:182341000-182341001
chr1:182368482-182368483	chr1:182368482-182368483
chr1:182514583-182514584	chr1:182489680-182489681
chr1:182520260-182520261	chr1:182505711-182505712
chr1:182514583-182514584	chr1:182027495-182027496
chr1:182505711-182505712	chr1:182091316-182091317
chr1:182514583-182514584	chr1:182125013-182125014
chr1:182520260-182520261	chr1:182341000-182341001
chr1:182514583-182514584	chr1:182489680-182489681
chr1:182520260-182520261	chr1:182505711-182505712
chr1:182520260-182520261	chr1:182514583-182514584
chr1:182527832-182527833	chr1:182514583-182514584
chr1:183146405-183146406	chr1:182520260-182520261
chr1:183298139-183298140	chr1:182514583-182514584
chr1:182527832-182527833	chr1:182520260-182520261
chr1:183146405-183146406	chr1:182514583-182514584
chr1:183298139-183298140	chr1:182520260-182520261
chr1:184034177-184034178	chr1:183905545-183905546
chr1:184034177-184034178	chr1:183917315-183917316
chr1:184083962-184083963	chr1:183940880-183940881
chr1:184034177-184034178	chr1:183945100-183945101
chr1:184083962-184083963	chr1:183917315-183917316
chr1:184034177-184034178	chr1:183940880-183940881
chr1:184083962-184083963	chr1:184034177-184034178
chr1:184733114-184733115	chr1:184076937-184076938
chr1:184782626-184782627	chr1:184083962-184083963
chr1:184733114-184733115	chr1:184083962-184083963
chr1:184083962-184083963	chr1:184034177-184034178
chr1:184733114-184733115	chr1:184052243-184052244
chr1:184140945-184140946	chr1:184076937-184076938
chr1:184707879-184707880	chr1:184083962-184083963
chr1:184733114-184733115	chr1:184271627-184271628
chr1:184733114-184733115	chr1:184456116-184456117
chr1:184733114-184733115	chr1:184531882-184531883
chr1:184733114-184733115	chr1:184662832-184662833
chr1:184733114-184733115	chr1:184695542-184695543
chr1:184733114-184733115	chr1:184707879-184707880
chr1:184733114-184733115	chr1:184034177-184034178
chr1:185204424-185204425	chr1:184845970-184845971
chr1:185218050-185218051	chr1:184845970-184845971
chr1:185218050-185218051	chr1:185204424-185204425
chr1:186455115-186455116	chr1:186449512-186449513
chr1:189887162-189887163	chr1:189728201-189728202
chr1:189922262-189922263	chr1:189887162-189887163
chr1:190928609-190928610	chr1:190911557-190911558
chr1:192789407-192789408	chr1:192137202-192137203
chr1:192730555-192730556	chr1:192137202-192137203
chr1:192736055-192736056	chr1:192137202-192137203
chr1:192780228-192780229	chr1:192090985-192090986
chr1:192789407-192789408	chr1:192137202-192137203
chr1:192799234-192799235	chr1:192736055-192736056
chr1:192823011-192823012	chr1:192780228-192780229
chr1:192850813-192850814	chr1:192137202-192137203
chr1:192854943-192854944	chr1:192789407-192789408
chr1:192858654-192858655	chr1:192789407-192789408
chr1:193130350-193130351	chr1:192137202-192137203
chr1:192789407-192789408	chr1:192789407-192789408
chr1:193130350-193130351	chr1:192799234-192799235
chr1:192789407-192789408	chr1:192137202-192137203
chr1:192799234-192799235	chr1:192789407-192789408
chr1:192806443-192806444	chr1:192799234-192799235
chr1:192823011-192823012	chr1:192823011-192823012
chr1:192850813-192850814	chr1:192137202-192137203
chr1:192854943-192854944	chr1:192789407-192789408
chr1:193130350-193130351	chr1:192137202-192137203
chr1:193189032-193189033	chr1:192137202-192137203
chr1:193400011-193400012	chr1:192736055-192736056
chr1:192823011-192823012	chr1:192789407-192789408
chr1:192850813-192850814	chr1:192789407-192789408
chr1:192850813-192850814	chr1:192789407-192789408
chr1:193414247-193414248	chr1:193400011-193400012
chr1:194619858-194619859	chr1:193400011-193400012
chr10:4387070-4387071	chr10:4028347-4028348
chr10:5208397-5208398	chr10:5194778-5194779
chr10:8117037-8117038	chr10:7956496-7956497
chr10:8176219-8176220	chr10:7956496-7956497
chr10:8518465-8518466	chr10:7956496-7956497
chr10:8762387-8762388	chr10:8748151-8748152
chr10:8768786-8768787	chr10:8762387-8762388
chr10:8772817-8772818	chr10:8762387-8762388
chr10:11149381-11149382	chr10:10556957-10556958
chr10:12869258-12869259	chr10:12694680-12694681
chr10:12869258-12869259	chr10:12786977-12786978
chr10:12879389-12879390	chr10:12869258-12869259
chr10:12922573-12922574	chr10:12869258-12869259
chr10:13965428-13965429	chr10:13665576-13665577
chr10:14018275-14018276	chr10:13665576-13665577
chr10:14055726-14055727	chr10:13553154-13553155
chr10:13965428-13965429	chr10:13572625-13572626
chr10:13832636-13832637	chr10:13665576-13665577
chr10:13869709-13869710	chr10:13689010-13689011
chr10:13965428-13965429	chr10:13775278-13775279
chr10:14018275-14018276	chr10:13782644-13782645
chr10:13965428-13965429	chr10:13788351-13788352
chr10:13965428-13965429	chr10:13832636-13832637
chr10:13965428-13965429	chr10:13869709-13869710
chr10:13965428-13965429	chr10:13553154-13553155
chr10:13965428-13965429	chr10:13665576-13665577
chr10:13965428-13965429	chr10:13965428-13965429
chr10:14018275-14018276	chr10:13965428-13965429
chr10:14048710-14048711	chr10:13553154-13553155
chr10:14055726-14055727	chr10:13965428-13965429
chr10:14313592-14313593	chr10:14048710-14048711
chr10:14385781-14385782	chr10:13965428-13965429
chr10:14055726-14055727	chr10:13965428-13965429
chr10:17723402-17723403	chr10:16545976-16545977
chr10:16553618-16553619	chr10:16545976-16545977
chr10:17013892-17013893	chr10:16553618-16553619
chr10:17723402-17723403	chr10:16578435-16578436
chr10:17013892-17013893	chr10:16623487-16623488
chr10:17723402-17723403	chr10:16499296-16499297
chr10:17013892-17013893	chr10:16545976-16545977
chr10:17723402-17723403	chr10:16553618-16553619
chr10:17013892-17013893	chr10:16578435-16578436
chr10:17723402-17723403	chr10:16623487-16623488
chr10:17723402-17723403	chr10:16874735-16874736
chr10:17723402-17723403	chr10:17005620-17005621
chr10:17723402-17723403	chr10:17013892-17013893
chr10:17723402-17723403	chr10:17042998-17042999
chr10:17723402-17723403	chr10:17175728-17175729
chr10:17723402-17723403	chr10:17347955-17347956
chr10:17723402-17723403	chr10:17364458-17364459
chr10:17723402-17723403	chr10:17655404-17655405
chr10:18433488-18433489	chr10:18023261-18023262
chr10:19046150-19046151	chr10:19015445-19015446
chr10:19126658-19126659	chr10:19015445-19015446
chr10:20952935-20952936	chr10:20312523-20312524
chr10:20971174-20971175	chr10:20312523-20312524
chr10:21784498-21784499	chr10:21399495-21399496
chr10:21790540-21790541	chr10:21399495-21399496
chr10:21796173-21796174	chr10:21411884-21411885
chr10:21829083-21829084	chr10:21784498-21784499
chr10:21834024-21834025	chr10:21399495-21399496
chr10:21994133-21994134	chr10:21399495-21399496
chr10:21790540-21790541	chr10:21411884-21411885
chr10:21829083-21829084	chr10:21399495-21399496
chr10:21790540-21790541	chr10:21399495-21399496
chr10:21994133-21994134	chr10:21784498-21784499
chr10:21994133-21994134	chr10:21790540-21790541
chr10:21994133-21994134	chr10:21796173-21796174
chr10:21994133-21994134	chr10:21834024-21834025
chr10:23787735-23787736	chr10:23177039-23177040
chr10:23185533-23185534	chr10:22731587-22731588
chr10:23787735-23787736	chr10:23177039-23177040
chr10:23787735-23787736	chr10:23185533-23185534
chr10:23787735-23787736	chr10:23204734-23204735
chr10:24149655-24149656	chr10:23787735-23787736
chr10:24164424-24164425	chr10:23787735-23787736
chr10:24596129-24596130	chr10:24380477-24380478
chr10:24596129-24596130	chr10:24392167-24392168
chr10:24392167-24392168	chr10:24380477-24380478
chr10:24447447-24447448	chr10:24392167-24392168
chr10:24477630-24477631	chr10:24397572-24397573
chr10:24589254-24589255	chr10:24380477-24380478
chr10:24596129-24596130	chr10:24392167-24392168
chr10:24596129-24596130	chr10:24397572-24397573
chr10:24397572-24397573	chr10:24447447-24447448
chr10:24447447-24447448	chr10:24477630-24477631
chr10:24477630-24477631	chr10:24392167-24392168
chr10:24581273-24581274	chr10:24447447-24447448
chr10:24589254-24589255	chr10:24477630-24477631
chr10:24596129-24596130	chr10:24380477-24380478
chr10:24447447-24447448	chr10:24392167-24392168
chr10:24477630-24477631	chr10:24397572-24397573
chr10:24589254-24589255	chr10:24447447-24447448
chr10:24596129-24596130	chr10:24477630-24477631
chr10:24477630-24477631	chr10:24581273-24581274
chr10:24581273-24581274	chr10:24210687-24210688
chr10:24589254-24589255	chr10:24374550-24374551
chr10:24596129-24596130	chr10:24380477-24380478
chr10:24554296-24554297	chr10:24388619-24388620
chr10:24581273-24581274	chr10:24392167-24392168
chr10:24589254-24589255	chr10:24397572-24397573
chr10:24596129-24596130	chr10:24447447-24447448
chr10:24596129-24596130	chr10:24477630-24477631
chr10:24589254-24589255	chr10:24554296-24554297
chr10:24596129-24596130	chr10:24581273-24581274
chr10:24596129-24596130	chr10:24589254-24589255
chr10:25714257-25714258	chr10:25275902-25275903
chr10:25790003-25790004	chr10:25272031-25272032
chr10:26079004-26079005	chr10:25272031-25272032
chr10:25297010-25297011	chr10:25714257-25714258
chr10:26079004-26079005	chr10:25272031-25272032
chr10:26079004-26079005	chr10:25275902-25275903
chr10:26079004-26079005	chr10:25520738-25520739
chr10:25790003-25790004	chr10:25695459-25695460
chr10:26079004-26079005	chr10:25714257-25714258
chr10:26079004-26079005	chr10:25790003-25790004
chr10:26374899-26374900	chr10:26359297-26359298
chr10:26492156-26492157	chr10:26374899-26374900
chr10:26564554-26564555	chr10:26374899-26374900
chr10:26805071-26805072	chr10:26374899-26374900
chr10:26894455-26894456	chr10:26374899-26374900
chr10:26900518-26900519	chr10:26374899-26374900
chr10:26995871-26995872	chr10:26374899-26374900
chr10:29362127-29362128	chr10:29313548-29313549
chr10:32064723-32064724	chr10:31608663-31608664
chr10:34206279-34206280	chr10:34019082-34019083
chr10:34281786-34281787	chr10:34194569-34194570
chr10:34296936-34296937	chr10:34019082-34019083
chr10:34206279-34206280	chr10:34019082-34019083
chr10:34296936-34296937	chr10:34281786-34281787
chr10:39522392-39522393	chr10:39171042-39171043
chr10:39614533-39614534	chr10:39171042-39171043
chr10:39614533-39614534	chr10:39261993-39261994
chr10:40301943-40301944	chr10:40257629-40257630
chr10:40521871-40521872	chr10:40301943-40301944
chr10:40882742-40882743	chr10:40257629-40257630
chr10:40349100-40349101	chr10:40257629-40257630
chr10:41477084-41477085	chr10:41450230-41450231
chr10:42276146-42276147	chr10:41519135-41519136
chr10:41809964-41809965	chr10:41477084-41477085
chr10:42276146-42276147	chr10:41519135-41519136
chr10:42276146-42276147	chr10:41809964-41809965
chr10:42502070-42502071	chr10:41866105-41866106
chr10:42276146-42276147	chr10:41887369-41887370
chr10:42276146-42276147	chr10:42260902-42260903
chr10:42276146-42276147	chr10:41809964-41809965
chr10:42762328-42762329	chr10:42478107-42478108
chr10:42502070-42502071	chr10:42276146-42276147
chr10:42762328-42762329	chr10:42502070-42502071
chr10:43902418-43902419	chr10:43479518-43479519
chr10:45066968-45066969	chr10:44518896-44518897
chr10:44875095-44875096	chr10:44268435-44268436
chr10:52418481-52418482	chr10:52234052-52234053
chr10:52418481-52418482	chr10:52382920-52382921
chr10:52418481-52418482	chr10:52400335-52400336
chr10:56783452-56783453	chr10:56377499-56377500
chr10:58446385-58446386	chr10:58322330-58322331
chr10:59221908-59221909	chr10:58811744-58811745
chr10:59323853-59323854	chr10:59311061-59311062
chr10:59334564-59334565	chr10:59323853-59323854
chr10:59879373-59879374	chr10:59510721-59510722
chr10:59900040-59900041	chr10:59510721-59510722
chr10:59578665-59578666	chr10:59510721-59510722
chr10:59616619-59616620	chr10:59323853-59323854
chr10:59638627-59638628	chr10:59510721-59510722
chr10:59879373-59879374	chr10:59323853-59323854
chr10:59900040-59900041	chr10:59510721-59510722
chr10:59900040-59900041	chr10:59879373-59879374
chr10:59909767-59909768	chr10:59900040-59900041
chr10:59919005-59919006	chr10:59900040-59900041
chr10:59951890-59951891	chr10:59909767-59909768
chr10:59919005-59919006	chr10:59900040-59900041
chr10:59951890-59951891	chr10:59909767-59909768
chr10:59951890-59951891	chr10:59919005-59919006
chr10:60816996-60816997	chr10:60353573-60353574
chr10:60379919-60379920	chr10:60353573-60353574
chr10:60752928-60752929	chr10:60277603-60277604
chr10:60816996-60816997	chr10:60353573-60353574
chr10:60827002-60827003	chr10:60771258-60771259
chr10:60831664-60831665	chr10:60795255-60795256
chr10:60816996-60816997	chr10:60808797-60808798
chr10:60816996-60816997	chr10:60816996-60816997
chr10:60816996-60816997	chr10:60353573-60353574
chr10:60823019-60823020	chr10:60816996-60816997
chr10:60827002-60827003	chr10:60353573-60353574
chr10:60831664-60831665	chr10:60816996-60816997
chr10:61123725-61123726	chr10:60823019-60823020
chr10:60831664-60831665	chr10:60816996-60816997
chr10:61148086-61148087	chr10:61123725-61123726
chr10:61695255-61695256	chr10:61680204-61680205
chr10:63382841-63382842	chr10:63023825-63023826
chr10:66927941-66927942	chr10:66921992-66921993
chr10:67003630-67003631	chr10:66921992-66921993
chr10:67186444-67186445	chr10:66927941-66927942
chr10:67003630-67003631	chr10:66921992-66921993
chr10:67186444-67186445	chr10:67126254-67126255
chr10:67537573-67537574	chr10:67528650-67528651
chr10:67548926-67548927	chr10:67537573-67537574
chr10:67747919-67747920	chr10:67537573-67537574
chr10:67755740-67755741	chr10:67537573-67537574
chr10:68007935-68007936	chr10:67537573-67537574
chr10:68090922-68090923	chr10:68002255-68002256
chr10:68136573-68136574	chr10:67537573-67537574
chr10:68007935-68007936	chr10:68002255-68002256
chr10:68090922-68090923	chr10:68007935-68007936
chr10:68136573-68136574	chr10:68007935-68007936
chr10:68090922-68090923	chr10:68090922-68090923
chr10:68104893-68104894	chr10:67537573-67537574
chr10:68136573-68136574	chr10:68002255-68002256
chr10:68104893-68104894	chr10:68007935-68007936
chr10:68136573-68136574	chr10:68104893-68104894
chr10:69777768-69777769	chr10:69756695-69756696
chr10:72654332-72654333	chr10:71346253-71346254
chr10:75221819-75221820	chr10:75211992-75211993
chr10:75252482-75252483	chr10:75211992-75211993
chr10:75921759-75921760	chr10:75898932-75898933
chr10:75931458-75931459	chr10:75921759-75921760
chr10:75938254-75938255	chr10:75921759-75921760
chr10:75938254-75938255	chr10:75931458-75931459
chr10:76728283-76728284	chr10:76635129-76635130
chr10:76645313-76645314	chr10:76635129-76635130
chr10:76649784-76649785	chr10:76649784-76649785
chr10:76728283-76728284	chr10:76623718-76623719
chr10:76728283-76728284	chr10:76635129-76635130
chr10:76669050-76669051	chr10:76645313-76645314
chr10:76728283-76728284	chr10:76649784-76649785
chr10:76733553-76733554	chr10:76669050-76669051
chr10:76728283-76728284	chr10:76649784-76649785
chr10:76733553-76733554	chr10:76728283-76728284
chr10:77252002-77252003	chr10:77211103-77211104
chr10:77582744-77582745	chr10:77515817-77515818
chr10:77623308-77623309	chr10:77570007-77570008
chr10:77582744-77582745	chr10:77515817-77515818
chr10:77623308-77623309	chr10:77582744-77582745
chr10:77978221-77978222	chr10:77623308-77623309
chr10:78009805-78009806	chr10:77623308-77623309
chr10:78426099-78426100	chr10:78412951-78412952
chr10:78592059-78592060	chr10:78574512-78574513
chr10:79097972-79097973	chr10:78574512-78574513
chr10:79106370-79106371	chr10:78592059-78592060
chr10:79116736-79116737	chr10:78716705-78716706
chr10:79097972-79097973	chr10:78722118-78722119
chr10:79102171-79102172	chr10:78592059-78592060
chr10:79106370-79106371	chr10:78574512-78574513
chr10:79116736-79116737	chr10:78592059-78592060
chr10:79097972-79097973	chr10:79097972-79097973
chr10:79097972-79097973	chr10:78574512-78574513
chr10:79106370-79106371	chr10:78592059-78592060
chr10:79116736-79116737	chr10:79097972-79097973
chr10:79853441-79853442	chr10:79794075-79794076
chr10:79853441-79853442	chr10:79824644-79824645
chr10:79853441-79853442	chr10:79841046-79841047
chr10:79926703-79926704	chr10:79853441-79853442
chr10:79986520-79986521	chr10:79853441-79853442
chr10:79908578-79908579	chr10:79841046-79841047
chr10:79917831-79917832	chr10:79853441-79853442
chr10:79926703-79926704	chr10:79908578-79908579
chr10:79960061-79960062	chr10:79917831-79917832
chr10:79986520-79986521	chr10:79853441-79853442
chr10:80073628-80073629	chr10:79926703-79926704
chr10:80102591-80102592	chr10:79841046-79841047
chr10:80115700-80115701	chr10:79853441-79853442
chr10:80142438-80142439	chr10:79908578-79908579
chr10:80150824-80150825	chr10:79926703-79926704
chr10:80160057-80160058	chr10:79960061-79960062
chr10:80165810-80165811	chr10:79986520-79986521
chr10:80226411-80226412	chr10:79986520-79986521
chr10:80249352-80249353	chr10:79986520-79986521
chr10:80261341-80261342	chr10:80039784-80039785
chr10:79926703-79926704	chr10:79853441-79853442
chr10:79986520-79986521	chr10:79986520-79986521
chr10:79926703-79926704	chr10:80039784-80039785
chr10:79960061-79960062	chr10:80053440-80053441
chr10:79986520-79986521	chr10:79986520-79986521
chr10:80115700-80115701	chr10:80073628-80073629
chr10:80142438-80142439	chr10:79853441-79853442
chr10:80150824-80150825	chr10:79986520-79986521
chr10:80165810-80165811	chr10:80039784-80039785
chr10:79986520-79986521	chr10:80053440-80053441
chr10:79996148-79996149	chr10:80073628-80073629
chr10:80039784-80039785	chr10:80084993-80084994
chr10:80053440-80053441	chr10:79986520-79986521
chr10:80073628-80073629	chr10:80073628-80073629
chr10:80084993-80084994	chr10:80102591-80102592
chr10:80102591-80102592	chr10:79853441-79853442
chr10:80107690-80107691	chr10:79926703-79926704
chr10:80115700-80115701	chr10:79986520-79986521
chr10:80142438-80142439	chr10:80039784-80039785
chr10:80150824-80150825	chr10:80053440-80053441
chr10:80160057-80160058	chr10:80073628-80073629
chr10:80165810-80165811	chr10:80102591-80102592
chr10:80172848-80172849	chr10:80107690-80107691
chr10:80261341-80261342	chr10:79853441-79853442
chr10:80264824-80264825	chr10:79926703-79926704
chr10:80399693-80399694	chr10:79986520-79986521
chr10:80150824-80150825	chr10:80073628-80073629
chr10:80053440-80053441	chr10:80102591-80102592
chr10:80073628-80073629	chr10:80115700-80115701
chr10:80102591-80102592	chr10:79853441-79853442
chr10:80115700-80115701	chr10:79926703-79926704
chr10:80150824-80150825	chr10:79986520-79986521
chr10:80073628-80073629	chr10:79996148-79996149
chr10:80102591-80102592	chr10:80039784-80039785
chr10:80115700-80115701	chr10:80053440-80053441
chr10:80150824-80150825	chr10:80073628-80073629
chr10:80084993-80084994	chr10:80102591-80102592
chr10:80102591-80102592	chr10:80115700-80115701
chr10:80107690-80107691	chr10:80142438-80142439
chr10:80115700-80115701	chr10:79853441-79853442
chr10:80142438-80142439	chr10:79986520-79986521
chr10:80150824-80150825	chr10:80073628-80073629
chr10:80160057-80160058	chr10:80142438-80142439
chr10:80165810-80165811	chr10:80150824-80150825
chr10:80102591-80102592	chr10:79853441-79853442
chr10:80107690-80107691	chr10:79926703-79926704
chr10:80115700-80115701	chr10:79986520-79986521
chr10:80142438-80142439	chr10:80073628-80073629
chr10:80150824-80150825	chr10:80102591-80102592
chr10:80165810-80165811	chr10:80115700-80115701
chr10:80115700-80115701	chr10:80142438-80142439
chr10:80142438-80142439	chr10:80150824-80150825
chr10:80150824-80150825	chr10:80160057-80160058
chr10:80165810-80165811	chr10:79986520-79986521
chr10:80150824-80150825	chr10:80150824-80150825
chr10:80160057-80160058	chr10:80160057-80160058
chr10:80165810-80165811	chr10:80165810-80165811
chr10:80160057-80160058	chr10:79853441-79853442
chr10:80165810-80165811	chr10:80165810-80165811
chr10:80172848-80172849	chr10:79853441-79853442
chr10:80249352-80249353	chr10:80150824-80150825
chr10:80261341-80261342	chr10:80165810-80165811
chr10:80264824-80264825	chr10:79853441-79853442
chr10:80165810-80165811	chr10:79986520-79986521
chr10:80172848-80172849	chr10:80150824-80150825
chr10:80172848-80172849	chr10:80165810-80165811
chr10:80226411-80226412	chr10:80249352-80249353
chr10:80249352-80249353	chr10:79986520-79986521
chr10:80261341-80261342	chr10:80150824-80150825
chr10:80264824-80264825	chr10:80165810-80165811
chr10:80261341-80261342	chr10:80249352-80249353
chr10:80264824-80264825	chr10:80320550-80320551
chr10:80348816-80348817	chr10:80348816-80348817
chr10:80399693-80399694	chr10:79986520-79986521
chr10:80385922-80385923	chr10:80320550-80320551
chr10:80399693-80399694	chr10:80348816-80348817
chr10:80399693-80399694	chr10:80385922-80385923
chr10:80406862-80406863	chr10:80385922-80385923
chr10:80406862-80406863	chr10:80399693-80399694
chr10:80434127-80434128	chr10:80399693-80399694
chr10:80577615-80577616	chr10:80406862-80406863
chr10:80702012-80702013	chr10:80399693-80399694
chr10:80751698-80751699	chr10:80577615-80577616
chr10:80798155-80798156	chr10:80577615-80577616
chr10:80434127-80434128	chr10:80590501-80590502
chr10:80590501-80590502	chr10:80577615-80577616
chr10:80603126-80603127	chr10:80603126-80603127
chr10:80621933-80621934	chr10:80399693-80399694
chr10:80702012-80702013	chr10:80577615-80577616
chr10:80603126-80603127	chr10:80621933-80621934
chr10:80621933-80621934	chr10:80676549-80676550
chr10:80702012-80702013	chr10:80702012-80702013
chr10:80702012-80702013	chr10:80399693-80399694
chr10:80742476-80742477	chr10:80702012-80702013
chr10:80751698-80751699	chr10:80751698-80751699
chr10:80798155-80798156	chr10:80751698-80751699
chr10:81137591-81137592	chr10:80757077-80757078
chr10:80798155-80798156	chr10:80751698-80751699
chr10:80757077-80757078	chr10:80757077-80757078
chr10:80763824-80763825	chr10:80399693-80399694
chr10:80775642-80775643	chr10:80702012-80702013
chr10:80798155-80798156	chr10:80742476-80742477
chr10:80826430-80826431	chr10:80751698-80751699
chr10:80929945-80929946	chr10:80757077-80757078
chr10:80763824-80763825	chr10:80763824-80763825
chr10:80775642-80775643	chr10:80775642-80775643
chr10:80798155-80798156	chr10:80751698-80751699
chr10:80826430-80826431	chr10:80757077-80757078
chr10:80798155-80798156	chr10:80798155-80798156
chr10:80798155-80798156	chr10:80798155-80798156
chr10:80826430-80826431	chr10:80751698-80751699
chr10:80901203-80901204	chr10:80798155-80798156
chr10:80929945-80929946	chr10:80826430-80826431
chr10:80938729-80938730	chr10:80901203-80901204
chr10:81137591-81137592	chr10:80798155-80798156
chr10:81168148-81168149	chr10:80929945-80929946
chr10:80929945-80929946	chr10:80929945-80929946
chr10:80929945-80929946	chr10:80938729-80938730
chr10:80938729-80938730	chr10:80929945-80929946
chr10:80955606-80955607	chr10:80938729-80938730
chr10:80961185-80961186	chr10:80955606-80955607
chr10:80988284-80988285	chr10:80929945-80929946
chr10:80955606-80955607	chr10:80702012-80702013
chr10:80961185-80961186	chr10:80798155-80798156
chr10:80961185-80961186	chr10:81106054-81106055
chr10:81137591-81137592	chr10:81137591-81137592
chr10:81168148-81168149	chr10:80798155-80798156
chr10:81146524-81146525	chr10:81106054-81106055
chr10:81168148-81168149	chr10:81137591-81137592
chr10:81173313-81173314	chr10:81137591-81137592
chr10:81173313-81173314	chr10:81168148-81168149
chr10:81293160-81293161	chr10:81267367-81267368
chr10:81320543-81320544	chr10:81267367-81267368
chr10:81349405-81349406	chr10:81293160-81293161
chr10:81320543-81320544	chr10:81320543-81320544
chr10:81349405-81349406	chr10:81267367-81267368
chr10:81329557-81329558	chr10:81293160-81293161
chr10:81349405-81349406	chr10:81320543-81320544
chr10:81349405-81349406	chr10:81329557-81329558
chr10:81378729-81378730	chr10:81349405-81349406
chr10:81384379-81384380	chr10:81349405-81349406
chr10:81384379-81384380	chr10:81378729-81378730
chr10:81407525-81407526	chr10:81401808-81401809
chr10:81597478-81597479	chr10:81571088-81571089
chr10:82699186-82699187	chr10:82690221-82690222
chr10:82859096-82859097	chr10:82814247-82814248
chr10:82985316-82985317	chr10:82958752-82958753
chr10:83648614-83648615	chr10:83638175-83638176
chr10:84438410-84438411	chr10:83995052-83995053
chr10:84438410-84438411	chr10:83883012-83883013
chr10:84388718-84388719	chr10:83995052-83995053
chr10:84438410-84438411	chr10:84003883-84003884
chr10:84438410-84438411	chr10:83995052-83995053
chr10:84438410-84438411	chr10:83648614-83648615
chr10:84003883-84003884	chr10:83871831-83871832
chr10:84388718-84388719	chr10:83883012-83883013
chr10:84392505-84392506	chr10:83895807-83895808
chr10:84438410-84438411	chr10:83908913-83908914
chr10:84388718-84388719	chr10:83995052-83995053
chr10:84438410-84438411	chr10:84003883-84003884
chr10:84438410-84438411	chr10:84080483-84080484
chr10:84438410-84438411	chr10:84144101-84144102
chr10:84438410-84438411	chr10:84388718-84388719
chr10:84438410-84438411	chr10:84392505-84392506
chr10:84438410-84438411	chr10:84409315-84409316
chr10:84438410-84438411	chr10:84433314-84433315
chr10:84622578-84622579	chr10:84533284-84533285
chr10:86172603-86172604	chr10:86100734-86100735
chr10:86301792-86301793	chr10:86100734-86100735
chr10:86301792-86301793	chr10:86172603-86172604
chr10:88731142-88731143	chr10:88378716-88378717
chr10:90142856-90142857	chr10:89744833-89744834
chr10:91082662-91082663	chr10:91073713-91073714
chr10:91094359-91094360	chr10:91082662-91082663
chr10:91123826-91123827	chr10:91082662-91082663
chr10:91181729-91181730	chr10:91158621-91158622
chr10:91167555-91167556	chr10:91123826-91123827
chr10:91181729-91181730	chr10:91158621-91158622
chr10:91181729-91181730	chr10:91167555-91167556
chr10:91181729-91181730	chr10:91171809-91171810
chr10:91199389-91199390	chr10:91181729-91181730
chr10:93160541-93160542	chr10:91181729-91181730
chr10:93160541-93160542	chr10:93138807-93138808
chr10:93272090-93272091	chr10:93160541-93160542
chr10:93288137-93288138	chr10:93160541-93160542
chr10:93343030-93343031	chr10:93160541-93160542
chr10:93424210-93424211	chr10:93160541-93160542
chr10:93433151-93433152	chr10:93343030-93343031
chr10:93453209-93453210	chr10:93160541-93160542
chr10:93589505-93589506	chr10:93160541-93160542
chr10:93801866-93801867	chr10:93424210-93424211
chr10:93424210-93424211	chr10:93433151-93433152
chr10:93453209-93453210	chr10:93160541-93160542
chr10:93453209-93453210	chr10:93160541-93160542
chr10:93801866-93801867	chr10:93453209-93453210
chr10:93801866-93801867	chr10:93589505-93589506
chr10:93801866-93801867	chr10:93617451-93617452
chr10:93801866-93801867	chr10:93621090-93621091
chr10:93944437-93944438	chr10:93889560-93889561
chr10:94048609-94048610	chr10:94036038-94036039
chr10:94117226-94117227	chr10:94036038-94036039
chr10:94523846-94523847	chr10:94514215-94514216
chr10:94545660-94545661	chr10:94514215-94514216
chr10:95514887-95514888	chr10:95003943-95003944
chr10:95884553-95884554	chr10:95710126-95710127
chr10:95940838-95940839	chr10:95514887-95514888
chr10:95769037-95769038	chr10:95514887-95514888
chr10:96616771-96616772	chr10:96239276-96239277
chr10:96628518-96628519	chr10:96616771-96616772
chr10:96633069-96633070	chr10:96616771-96616772
chr10:96948513-96948514	chr10:96616771-96616772
chr10:97337771-97337772	chr10:96616771-96616772
chr10:98914822-98914823	chr10:98325098-98325099
chr10:98914822-98914823	chr10:98333242-98333243
chr10:98914822-98914823	chr10:98509093-98509094
chr10:98914822-98914823	chr10:98519109-98519110
chr10:99262357-99262358	chr10:99171405-99171406
chr10:99580973-99580974	chr10:99201889-99201890
chr10:99245168-99245169	chr10:99245168-99245169
chr10:99262357-99262358	chr10:99108007-99108008
chr10:99580973-99580974	chr10:99171405-99171406
chr10:99245168-99245169	chr10:99201889-99201890
chr10:99262357-99262358	chr10:99237230-99237231
chr10:99262357-99262358	chr10:99245168-99245169
chr10:99251029-99251030	chr10:99251029-99251030
chr10:99262357-99262358	chr10:99245168-99245169
chr10:99297888-99297889	chr10:99262357-99262358
chr10:99580973-99580974	chr10:99262357-99262358
chr10:99262357-99262358	chr10:99262357-99262358
chr10:99297888-99297889	chr10:99108007-99108008
chr10:99396405-99396406	chr10:99171405-99171406
chr10:99422883-99422884	chr10:99245168-99245169
chr10:99580973-99580974	chr10:99262357-99262358
chr10:108161949-108161950	chr10:107799926-107799927
chr10:108161949-108161950	chr10:107932522-107932523
chr10:108174912-108174913	chr10:108161949-108161950
chr10:108185398-108185399	chr10:108161949-108161950
chr10:108537542-108537543	chr10:108161949-108161950
chr10:110928186-110928187	chr10:110920801-110920802
chr10:111518065-111518066	chr10:111506667-111506668
chr10:111571117-111571118	chr10:111510713-111510714
chr10:111576127-111576128	chr10:111506667-111506668
chr10:111620092-111620093	chr10:111510713-111510714
chr10:111937156-111937157	chr10:111506667-111506668
chr10:111972809-111972810	chr10:111518065-111518066
chr10:111518065-111518066	chr10:111571117-111571118
chr10:111571117-111571118	chr10:111506667-111506668
chr10:111576127-111576128	chr10:111576127-111576128
chr10:111937156-111937157	chr10:111506667-111506668
chr10:111576127-111576128	chr10:111518065-111518066
chr10:111620092-111620093	chr10:111506667-111506668
chr10:115383234-115383235	chr10:115315791-115315792
chr10:115383234-115383235	chr10:115328605-115328606
chr10:115383234-115383235	chr10:115332314-115332315
chr10:115383234-115383235	chr10:115362404-115362405
chr10:115758828-115758829	chr10:115383234-115383235
chr10:117149816-117149817	chr10:117063327-117063328
chr10:117174470-117174471	chr10:117149816-117149817
chr10:117393616-117393617	chr10:117377178-117377179
chr10:117720025-117720026	chr10:117377178-117377179
chr10:117720025-117720026	chr10:117710540-117710541
chr10:120226574-120226575	chr10:120208635-120208636
chr10:120623693-120623694	chr10:120476428-120476429
chr10:120627875-120627876	chr10:120226574-120226575
chr10:120638687-120638688	chr10:120476428-120476429
chr10:120859545-120859546	chr10:120616917-120616918
chr10:120898684-120898685	chr10:120226574-120226575
chr10:120616917-120616918	chr10:120476428-120476429
chr10:120623693-120623694	chr10:120616917-120616918
chr10:120627875-120627876	chr10:120476428-120476429
chr10:120632093-120632094	chr10:120623693-120623694
chr10:120638687-120638688	chr10:120226574-120226575
chr10:120701836-120701837	chr10:120476428-120476429
chr10:120859545-120859546	chr10:120623693-120623694
chr10:120898684-120898685	chr10:120627875-120627876
chr10:120623693-120623694	chr10:120632093-120632094
chr10:120627875-120627876	chr10:120476428-120476429
chr10:120632093-120632094	chr10:120623693-120623694
chr10:120638687-120638688	chr10:120226574-120226575
chr10:120717517-120717518	chr10:120476428-120476429
chr10:120638687-120638688	chr10:120226574-120226575
chr10:120638687-120638688	chr10:120476428-120476429
chr10:121626296-121626297	chr10:121586859-121586860
chr10:122046808-122046809	chr10:121626296-121626297
chr10:122046808-122046809	chr10:121903926-121903927
chr10:122984814-122984815	chr10:122886968-122886969
chr10:122984814-122984815	chr10:122886968-122886969
chr10:122984814-122984815	chr10:122893146-122893147
chr10:122893146-122893147	chr10:122829035-122829036
chr10:122912286-122912287	chr10:122855348-122855349
chr10:122984814-122984815	chr10:122882410-122882411
chr10:122912286-122912287	chr10:122886968-122886969
chr10:122984814-122984815	chr10:122893146-122893147
chr10:122984814-122984815	chr10:122912286-122912287
chr10:123011356-123011357	chr10:122984814-122984815
chr10:125966131-125966132	chr10:125785689-125785690
chr10:126331285-126331286	chr10:125966131-125966132
chr10:126521500-126521501	chr10:125966131-125966132
chr10:126929855-126929856	chr10:126924179-126924180
chr10:126979589-126979590	chr10:126929855-126929856
chr10:127042089-127042090	chr10:126929855-126929856
chr10:126935417-126935418	chr10:126929855-126929856
chr10:126957507-126957508	chr10:126924179-126924180
chr10:126962162-126962163	chr10:126929855-126929856
chr10:126979589-126979590	chr10:126935417-126935418
chr10:126987280-126987281	chr10:126957507-126957508
chr10:127042089-127042090	chr10:126962162-126962163
chr10:127063243-127063244	chr10:126929855-126929856
chr10:126979589-126979590	chr10:126979589-126979590
chr10:126979589-126979590	chr10:126924179-126924180
chr10:126979589-126979590	chr10:126929855-126929856
chr10:126987280-126987281	chr10:126979589-126979590
chr10:127042089-127042090	chr10:126929855-126929856
chr10:127063243-127063244	chr10:126979589-126979590
chr10:127063243-127063244	chr10:127042089-127042090
chr10:127070421-127070422	chr10:127063243-127063244
chr10:127190297-127190298	chr10:127165150-127165151
chr10:127196521-127196522	chr10:127190297-127190298
chr10:127211217-127211218	chr10:127190297-127190298
chr10:127211217-127211218	chr10:127196521-127196522
chr10:127290225-127290226	chr10:127266346-127266347
chr10:127311747-127311748	chr10:127290225-127290226
chr10:127339166-127339167	chr10:127311747-127311748
chr10:127598436-127598437	chr10:127591799-127591800
chr10:127609330-127609331	chr10:127591799-127591800
chr10:127616136-127616137	chr10:127598436-127598437
chr10:127642747-127642748	chr10:127591799-127591800
chr10:127609330-127609331	chr10:127598436-127598437
chr10:127616136-127616137	chr10:127609330-127609331
chr10:127621942-127621943	chr10:127598436-127598437
chr10:127642747-127642748	chr10:127609330-127609331
chr10:128059641-128059642	chr10:127616136-127616137
chr10:127616136-127616137	chr10:127591799-127591800
chr10:127621942-127621943	chr10:127598436-127598437
chr10:127642747-127642748	chr10:127609330-127609331
chr10:127621942-127621943	chr10:127616136-127616137
chr10:127642747-127642748	chr10:127621942-127621943
chr10:128037205-128037206	chr10:127642747-127642748
chr10:127642747-127642748	chr10:127642747-127642748
chr10:128037205-128037206	chr10:127662329-127662330
chr10:127662329-127662330	chr10:127642747-127642748
chr10:127668216-127668217	chr10:127616136-127616137
chr10:127676800-127676801	chr10:127621942-127621943
chr10:128037205-128037206	chr10:127642747-127642748
chr10:128059641-128059642	chr10:127662329-127662330
chr10:128091230-128091231	chr10:127668216-127668217
chr10:128095663-128095664	chr10:127676800-127676801
chr10:128491702-128491703	chr10:127598436-127598437
chr10:127668216-127668217	chr10:127642747-127642748
chr10:128037205-128037206	chr10:127662329-127662330
chr10:128059641-128059642	chr10:127668216-127668217
chr10:128095663-128095664	chr10:128037205-128037206
chr10:128037205-128037206	chr10:128059641-128059642
chr10:128059641-128059642	chr10:127642747-127642748
chr10:128091230-128091231	chr10:127668216-127668217
chr10:128095663-128095664	chr10:128037205-128037206
chr10:128037205-128037206	chr10:128059641-128059642
chr10:128059641-128059642	chr10:128082987-128082988
chr10:128091230-128091231	chr10:127642747-127642748
chr10:128095663-128095664	chr10:127662329-127662330
chr10:128082987-128082988	chr10:127668216-127668217
chr10:128091230-128091231	chr10:128037205-128037206
chr10:128095663-128095664	chr10:128059641-128059642
chr10:128091230-128091231	chr10:128082987-128082988
chr10:128095663-128095664	chr10:128095663-128095664
chr10:128176646-128176647	chr10:128149848-128149849
chr10:128176646-128176647	chr10:128270047-128270048
chr10:128303115-128303116	chr10:128337828-128337829
chr10:128344985-128344986	chr10:128337828-128337829
chr10:128411092-128411093	chr10:128369410-128369411
chr10:128411092-128411093	chr10:128411092-128411093
chr10:128458906-128458907	chr10:127642747-127642748
chr10:128491702-128491703	chr10:128411092-128411093
chr10:128499161-128499162	chr10:128491702-128491703
chr10:128525713-128525714	chr10:128491702-128491703
chr10:128536374-128536375	chr10:128491702-128491703
chr10:128548535-128548536	chr10:128525713-128525714
chr10:128566300-128566301	chr10:128491702-128491703
chr10:128536374-128536375	chr10:128525713-128525714
chr10:128548535-128548536	chr10:128536374-128536375
chr10:128548535-128548536	chr10:128491702-128491703
chr10:128566300-128566301	chr10:128548535-128548536
chr10:128626847-128626848	chr10:128566300-128566301
chr10:128697426-128697427	chr10:128626847-128626848
chr10:128705302-128705303	chr10:128697426-128697427
chr10:128804637-128804638	chr10:128747911-128747912
chr10:128804637-128804638	chr10:128779460-128779461
chr10:128821621-128821622	chr10:128804637-128804638
chr10:128922781-128922782	chr10:128910039-128910040
chr11:3331547-3331548	chr11:3266501-3266502
chr11:3337669-3337670	chr11:3331547-3331548
chr11:3374982-3374983	chr11:3331547-3331548
chr11:3648494-3648495	chr11:3537697-3537698
chr11:3914169-3914170	chr11:3648494-3648495
chr11:3914169-3914170	chr11:3895443-3895444
chr11:4218927-4218928	chr11:4185479-4185480
chr11:4190841-4190842	chr11:4160583-4160584
chr11:4218927-4218928	chr11:4185479-4185480
chr11:4594873-4594874	chr11:4276709-4276710
chr11:4300463-4300464	chr11:4300463-4300464
chr11:4308606-4308607	chr11:4218927-4218928
chr11:4594873-4594874	chr11:4578864-4578865
chr11:4607386-4607387	chr11:4594873-4594874
chr11:4637778-4637779	chr11:4594873-4594874
chr11:5100505-5100506	chr11:5065216-5065217
chr11:5261240-5261241	chr11:5100505-5100506
chr11:5521029-5521030	chr11:5100505-5100506
chr11:5788531-5788532	chr11:5100505-5100506
chr11:5788531-5788532	chr11:5521029-5521030
chr11:5788531-5788532	chr11:5762152-5762153
chr11:5795752-5795753	chr11:5788531-5788532
chr11:5862900-5862901	chr11:5788531-5788532
chr11:5862900-5862901	chr11:5836423-5836424
chr11:5862900-5862901	chr11:5856252-5856253
chr11:6444742-6444743	chr11:6415768-6415769
chr11:7130073-7130074	chr11:6697197-6697198
chr11:8444770-8444771	chr11:6697197-6697198
chr11:8468733-8468734	chr11:7236413-7236414
chr11:8444770-8444771	chr11:7425158-7425159
chr11:8444770-8444771	chr11:8439219-8439220
chr11:8444770-8444771	chr11:8444770-8444771
chr11:8468733-8468734	chr11:8444770-8444771
chr11:8451885-8451886	chr11:6697197-6697198
chr11:8463359-8463360	chr11:8439219-8439220
chr11:8468733-8468734	chr11:8444770-8444771
chr11:8821846-8821847	chr11:8463359-8463360
chr11:8468733-8468734	chr11:8468733-8468734
chr11:8530486-8530487	chr11:8693376-8693377
chr11:8704880-8704881	chr11:8444770-8444771
chr11:12304890-12304891	chr11:11953807-11953808
chr11:12340758-12340759	chr11:11821375-11821376
chr11:11962029-11962030	chr11:11821375-11821376
chr11:16752029-16752030	chr11:16546634-16546635
chr11:16752029-16752030	chr11:16717107-16717108
chr11:17211793-17211794	chr11:17159437-17159438
chr11:19018535-19018536	chr11:17469233-17469234
chr11:19018535-19018536	chr11:17686358-17686359
chr11:19018535-19018536	chr11:18069501-18069502
chr11:19018535-19018536	chr11:18938954-18938955
chr11:19666886-19666887	chr11:19018535-19018536
chr11:19671894-19671895	chr11:19018535-19018536
chr11:19920594-19920595	chr11:19836107-19836108
chr11:19924124-19924125	chr11:19836107-19836108
chr11:19979344-19979345	chr11:19831442-19831443
chr11:20202137-20202138	chr11:19836107-19836108
chr11:19843455-19843456	chr11:19843455-19843456
chr11:19848384-19848385	chr11:19848384-19848385
chr11:19920594-19920595	chr11:19831442-19831443
chr11:19924124-19924125	chr11:19836107-19836108
chr11:19979344-19979345	chr11:19848384-19848385
chr11:20202137-20202138	chr11:19831442-19831443
chr11:19920594-19920595	chr11:19836107-19836108
chr11:19920594-19920595	chr11:19920594-19920595
chr11:19924124-19924125	chr11:19924124-19924125
chr11:19979344-19979345	chr11:19831442-19831443
chr11:19979344-19979345	chr11:19836107-19836108
chr11:20533267-20533268	chr11:20477594-20477595
chr11:20542740-20542741	chr11:20477594-20477595
chr11:20542740-20542741	chr11:20533267-20533268
chr11:20631225-20631226	chr11:20542740-20542741
chr11:22318120-22318121	chr11:22287105-22287106
chr11:22982776-22982777	chr11:22631897-22631898
chr11:23306495-23306496	chr11:22982776-22982777
chr11:22990422-22990423	chr11:22990422-22990423
chr11:23306495-23306496	chr11:22990422-22990423
chr11:23007724-23007725	chr11:23007724-23007725
chr11:23066693-23066694	chr11:23066693-23066694
chr11:23306495-23306496	chr11:22631897-22631898
chr11:23066693-23066694	chr11:22982776-22982777
chr11:23306495-23306496	chr11:22990422-22990423
chr11:23074821-23074822	chr11:23007724-23007725
chr11:23306495-23306496	chr11:23066693-23066694
chr11:29692171-29692172	chr11:29547986-29547987
chr11:29884545-29884546	chr11:29547986-29547987
chr11:29884545-29884546	chr11:29840184-29840185
chr11:32267789-32267790	chr11:32221521-32221522
chr11:32455196-32455197	chr11:32356826-32356827
chr11:32662684-32662685	chr11:32642576-32642577
chr11:32693692-32693693	chr11:32642576-32642577
chr11:32706792-32706793	chr11:32642576-32642577
chr11:33147411-33147412	chr11:32642576-32642577
chr11:35419077-35419078	chr11:34866195-34866196
chr11:35588614-35588615	chr11:35419077-35419078
chr11:35769523-35769524	chr11:34866195-34866196
chr11:35424086-35424087	chr11:34866195-34866196
chr11:35877744-35877745	chr11:35838120-35838121
chr11:40755125-40755126	chr11:40733347-40733348
chr11:44216416-44216417	chr11:43836848-43836849
chr11:44324949-44324950	chr11:43836848-43836849
chr11:44324949-44324950	chr11:43919696-43919697
chr11:44725298-44725299	chr11:44617068-44617069
chr11:44812916-44812917	chr11:44617068-44617069
chr11:44944537-44944538	chr11:44725298-44725299
chr11:44948654-44948655	chr11:44617068-44617069
chr11:44812916-44812917	chr11:44725298-44725299
chr11:44944537-44944538	chr11:44812916-44812917
chr11:44944537-44944538	chr11:44617068-44617069
chr11:44948654-44948655	chr11:44812916-44812917
chr11:46056037-46056038	chr11:46039322-46039323
chr11:46073194-46073195	chr11:46056037-46056038
chr11:46082703-46082704	chr11:46056037-46056038
chr11:46116364-46116365	chr11:46073194-46073195
chr11:46215261-46215262	chr11:46082703-46082704
chr11:46082703-46082704	chr11:46056037-46056038
chr11:46092107-46092108	chr11:46082703-46082704
chr11:46116364-46116365	chr11:46056037-46056038
chr11:46215261-46215262	chr11:46082703-46082704
chr11:48871385-48871386	chr11:48800288-48800289
chr11:49204443-49204444	chr11:48871385-48871386
chr11:49243890-49243891	chr11:48800288-48800289
chr11:49251066-49251067	chr11:48834069-48834070
chr11:49204443-49204444	chr11:48871385-48871386
chr11:49092695-49092696	chr11:48871385-48871386
chr11:49204443-49204444	chr11:49204443-49204444
chr11:49217595-49217596	chr11:48800288-48800289
chr11:49243890-49243891	chr11:48871385-48871386
chr11:49251066-49251067	chr11:49204443-49204444
chr11:49217595-49217596	chr11:48800288-48800289
chr11:49243890-49243891	chr11:48871385-48871386
chr11:49251066-49251067	chr11:49204443-49204444
chr11:49251066-49251067	chr11:49243890-49243891
chr11:50211970-50211971	chr11:50174756-50174757
chr11:50225340-50225341	chr11:50211970-50211971
chr11:50252420-50252421	chr11:50211970-50211971
chr11:50292461-50292462	chr11:50225340-50225341
chr11:50324935-50324936	chr11:50211970-50211971
chr11:50252420-50252421	chr11:50225340-50225341
chr11:50292461-50292462	chr11:50252420-50252421
chr11:50292461-50292462	chr11:50275463-50275464
chr11:50292461-50292462	chr11:50211970-50211971
chr11:50324935-50324936	chr11:50292461-50292462
chr11:50441097-50441098	chr11:50431481-50431482
chr11:51263664-51263665	chr11:50431481-50431482
chr11:51263664-51263665	chr11:50441097-50441098
chr11:51263664-51263665	chr11:50827957-50827958
chr11:51263664-51263665	chr11:50931766-50931767
chr11:51263664-51263665	chr11:51059827-51059828
chr11:51584580-51584581	chr11:51263664-51263665
chr11:51606919-51606920	chr11:51584580-51584581
chr11:51615774-51615775	chr11:51606919-51606920
chr11:51620192-51620193	chr11:51606919-51606920
chr11:51635885-51635886	chr11:51606919-51606920
chr11:51689019-51689020	chr11:51620192-51620193
chr11:51635885-51635886	chr11:51606919-51606920
chr11:51689019-51689020	chr11:51620192-51620193
chr11:51689019-51689020	chr11:51635885-51635886
chr11:52360630-52360631	chr11:52000825-52000826
chr11:52360630-52360631	chr11:52231158-52231159
chr11:53300264-53300265	chr11:52448511-52448512
chr11:53310614-53310615	chr11:52648264-52648265
chr11:53350759-53350760	chr11:52360630-52360631
chr11:53300264-53300265	chr11:52396574-52396575
chr11:53310614-53310615	chr11:52448511-52448512
chr11:53245137-53245138	chr11:52656128-52656129
chr11:53300264-53300265	chr11:52360630-52360631
chr11:53245137-53245138	chr11:52396574-52396575
chr11:53300264-53300265	chr11:53300264-53300265
chr11:53310614-53310615	chr11:52360630-52360631
chr11:53350759-53350760	chr11:53300264-53300265
chr11:53430979-53430980	chr11:53310614-53310615
chr11:53350759-53350760	chr11:53300264-53300265
chr11:53762768-53762769	chr11:53755246-53755247
chr11:53796474-53796475	chr11:53762768-53762769
chr11:54866617-54866618	chr11:54787563-54787564
chr11:54866617-54866618	chr11:54860681-54860682
chr11:55032850-55032851	chr11:55023285-55023286
chr11:55414444-55414445	chr11:55406090-55406091
chr11:55420043-55420044	chr11:55406090-55406091
chr11:55426710-55426711	chr11:55414444-55414445
chr11:55420043-55420044	chr11:55406090-55406091
chr11:55426710-55426711	chr11:55414444-55414445
chr11:55446720-55446721	chr11:55420043-55420044
chr11:55426710-55426711	chr11:55414444-55414445
chr11:55446720-55446721	chr11:55420043-55420044
chr11:55469513-55469514	chr11:55426710-55426711
chr11:55446720-55446721	chr11:55420043-55420044
chr11:55469513-55469514	chr11:55426710-55426711
chr11:55469513-55469514	chr11:55446720-55446721
chr11:55469513-55469514	chr11:55461537-55461538
chr11:57674347-57674348	chr11:57645094-57645095
chr11:58330315-58330316	chr11:58302435-58302436
chr11:58954455-58954456	chr11:58939147-58939148
chr11:59227631-59227632	chr11:59202563-59202564
chr11:59208174-59208175	chr11:58939147-58939148
chr11:59227631-59227632	chr11:59208174-59208175
chr11:59307613-59307614	chr11:59227631-59227632
chr11:59505718-59505719	chr11:59412432-59412433
chr11:59472560-59472561	chr11:59307613-59307614
chr11:59420182-59420183	chr11:59227631-59227632
chr11:59839439-59839440	chr11:59810280-59810281
chr11:60309459-60309460	chr11:60106423-60106424
chr11:60115632-60115633	chr11:59810280-59810281
chr11:60309459-60309460	chr11:60220706-60220707
chr11:60728439-60728440	chr11:60707883-60707884
chr11:60777486-60777487	chr11:60728439-60728440
chr11:60878306-60878307	chr11:60777486-60777487
chr11:60830593-60830594	chr11:60728439-60728440
chr11:60878306-60878307	chr11:60777486-60777487
chr11:60932000-60932001	chr11:60830593-60830594
chr11:60878306-60878307	chr11:60878306-60878307
chr11:60913759-60913760	chr11:60777486-60777487
chr11:60932000-60932001	chr11:60878306-60878307
chr11:61407683-61407684	chr11:60913759-60913760
chr11:61494493-61494494	chr11:60878306-60878307
chr11:60932000-60932001	chr11:60878306-60878307
chr11:61494493-61494494	chr11:60932000-60932001
chr11:61494493-61494494	chr11:61407683-61407684
chr11:61505219-61505220	chr11:61494493-61494494
chr11:62281293-62281294	chr11:62146440-62146441
chr11:62281293-62281294	chr11:61930342-61930343
chr11:62281293-62281294	chr11:62077144-62077145
chr11:62250197-62250198	chr11:62120117-62120118
chr11:62281293-62281294	chr11:62146440-62146441
chr11:62281293-62281294	chr11:62250197-62250198
chr11:62550483-62550484	chr11:62457132-62457133
chr11:62820256-62820257	chr11:62789717-62789718
chr11:62832396-62832397	chr11:62820256-62820257
chr11:62879236-62879237	chr11:62820256-62820257
chr11:64088065-64088066	chr11:64080402-64080403
chr11:64435226-64435227	chr11:64080402-64080403
chr11:65786826-65786827	chr11:65779400-65779401
chr11:65806316-65806317	chr11:65786826-65786827
chr11:67052782-67052783	chr11:65806316-65806317
chr11:68901591-68901592	chr11:68853021-68853022
chr11:69037939-69037940	chr11:69014293-69014294
chr11:69041370-69041371	chr11:69014293-69014294
chr11:69059869-69059870	chr11:69037939-69037940
chr11:69098029-69098030	chr11:69014293-69014294
chr11:69411381-69411382	chr11:69037939-69037940
chr11:69045421-69045422	chr11:69041370-69041371
chr11:69059869-69059870	chr11:69045421-69045422
chr11:69098029-69098030	chr11:69041370-69041371
chr11:69123978-69123979	chr11:69045421-69045422
chr11:69411381-69411382	chr11:69059869-69059870
chr11:69059869-69059870	chr11:69041370-69041371
chr11:69062978-69062979	chr11:69045421-69045422
chr11:69072420-69072421	chr11:69059869-69059870
chr11:69098029-69098030	chr11:69062978-69062979
chr11:69123978-69123979	chr11:69014293-69014294
chr11:69059869-69059870	chr11:69037939-69037940
chr11:69062978-69062979	chr11:69041370-69041371
chr11:69072420-69072421	chr11:69045421-69045422
chr11:69098029-69098030	chr11:69059869-69059870
chr11:69411381-69411382	chr11:69062978-69062979
chr11:69067825-69067826	chr11:69067825-69067826
chr11:69072420-69072421	chr11:69072420-69072421
chr11:69098029-69098030	chr11:69037939-69037940
chr11:69123978-69123979	chr11:69041370-69041371
chr11:69411381-69411382	chr11:69059869-69059870
chr11:69072420-69072421	chr11:69062978-69062979
chr11:69098029-69098030	chr11:69067825-69067826
chr11:69123978-69123979	chr11:69072420-69072421
chr11:69411381-69411382	chr11:69098029-69098030
chr11:69098029-69098030	chr11:69325009-69325010
chr11:69123978-69123979	chr11:69366296-69366297
chr11:69411381-69411382	chr11:69098029-69098030
chr11:69098029-69098030	chr11:69123978-69123979
chr11:69123978-69123979	chr11:69260302-69260303
chr11:69411381-69411382	chr11:69325009-69325010
chr11:69418967-69418968	chr11:69366296-69366297
chr11:69123978-69123979	chr11:69382865-69382866
chr11:69396243-69396244	chr11:69014293-69014294
chr11:69411381-69411382	chr11:69037939-69037940
chr11:69418967-69418968	chr11:69045421-69045422
chr11:69882576-69882577	chr11:69059869-69059870
chr11:69396243-69396244	chr11:69062978-69062979
chr11:69411381-69411382	chr11:69067825-69067826
chr11:69396243-69396244	chr11:69072420-69072421
chr11:69411381-69411382	chr11:69098029-69098030
chr11:69366296-69366297	chr11:69123978-69123979
chr11:69396243-69396244	chr11:69260302-69260303
chr11:69411381-69411382	chr11:69325009-69325010
chr11:69382865-69382866	chr11:69366296-69366297
chr11:69396243-69396244	chr11:69382865-69382866
chr11:69411381-69411382	chr11:69396243-69396244
chr11:69396243-69396244	chr11:69072420-69072421
chr11:69411381-69411382	chr11:69098029-69098030
chr11:69411381-69411382	chr11:69396243-69396244
chr11:69418967-69418968	chr11:69411381-69411382
chr11:69920599-69920600	chr11:69411381-69411382
chr11:69418967-69418968	chr11:69411381-69411382
chr11:69580081-69580082	chr11:69672394-69672395
chr11:69672394-69672395	chr11:69411381-69411382
chr11:69838555-69838556	chr11:69411381-69411382
chr11:69846518-69846519	chr11:69672394-69672395
chr11:69876969-69876970	chr11:69838555-69838556
chr11:69882576-69882577	chr11:69411381-69411382
chr11:69920599-69920600	chr11:69846518-69846519
chr11:70653940-70653941	chr11:69098029-69098030
chr11:69920599-69920600	chr11:69411381-69411382
chr11:69682181-69682182	chr11:69672394-69672395
chr11:69846518-69846519	chr11:69838555-69838556
chr11:69882576-69882577	chr11:69846518-69846519
chr11:69920599-69920600	chr11:69876969-69876970
chr11:69846518-69846519	chr11:69882576-69882577
chr11:69882576-69882577	chr11:69882576-69882577
chr11:69920599-69920600	chr11:69396243-69396244
chr11:69876969-69876970	chr11:69411381-69411382
chr11:69882576-69882577	chr11:69580081-69580082
chr11:69920599-69920600	chr11:69672394-69672395
chr11:69882576-69882577	chr11:69838555-69838556
chr11:69920599-69920600	chr11:69846518-69846519
chr11:69901068-69901069	chr11:69876969-69876970
chr11:69913676-69913677	chr11:69882576-69882577
chr11:69920599-69920600	chr11:69901068-69901069
chr11:70190571-70190572	chr11:69913676-69913677
chr11:70653940-70653941	chr11:69920599-69920600
chr11:69920599-69920600	chr11:69920599-69920600
chr11:69920599-69920600	chr11:69981004-69981005
chr11:69981004-69981005	chr11:69920599-69920600
chr11:69990587-69990588	chr11:69981004-69981005
chr11:69996411-69996412	chr11:69990587-69990588
chr11:69990587-69990588	chr11:69981004-69981005
chr11:69996411-69996412	chr11:69990587-69990588
chr11:70000498-70000499	chr11:70000498-70000499
chr11:69996411-69996412	chr11:70000498-70000499
chr11:70000498-70000499	chr11:70015327-70015328
chr11:70015327-70015328	chr11:70021800-70021801
chr11:70021800-70021801	chr11:69882576-69882577
chr11:70021800-70021801	chr11:70190571-70190572
chr11:70028247-70028248	chr11:70221035-70221036
chr11:70198632-70198633	chr11:69411381-69411382
chr11:70653940-70653941	chr11:69882576-69882577
chr11:70239444-70239445	chr11:70190571-70190572
chr11:70653940-70653941	chr11:70239444-70239445
chr11:70653940-70653941	chr11:70452205-70452206
chr11:70653940-70653941	chr11:70540124-70540125
chr11:70653940-70653941	chr11:70646892-70646893
chr11:70668757-70668758	chr11:70646892-70646893
chr11:70668757-70668758	chr11:70653940-70653941
chr11:70700112-70700113	chr11:70653940-70653941
chr11:70700112-70700113	chr11:70668757-70668758
chr11:72214950-72214951	chr11:72207593-72207594
chr11:72690025-72690026	chr11:72607627-72607628
chr11:72847878-72847879	chr11:72792392-72792393
chr11:72847878-72847879	chr11:72796387-72796388
chr11:74831364-74831365	chr11:74826213-74826214
chr11:74837711-74837712	chr11:74826213-74826214
chr11:74837711-74837712	chr11:74831364-74831365
chr11:74925916-74925917	chr11:74831364-74831365
chr11:75169735-75169736	chr11:74992028-74992029
chr11:75185131-75185132	chr11:74992028-74992029
chr11:75462604-75462605	chr11:75013064-75013065
chr11:75169735-75169736	chr11:75016590-75016591
chr11:75169735-75169736	chr11:75047351-75047352
chr11:75013064-75013065	chr11:74992028-74992029
chr11:75053681-75053682	chr11:75013064-75013065
chr11:75156209-75156210	chr11:75053681-75053682
chr11:75169735-75169736	chr11:74831364-74831365
chr11:75053681-75053682	chr11:74837711-74837712
chr11:75156209-75156210	chr11:74925916-74925917
chr11:75169735-75169736	chr11:74992028-74992029
chr11:75462604-75462605	chr11:75013064-75013065
chr11:75053681-75053682	chr11:75016590-75016591
chr11:75169735-75169736	chr11:75053681-75053682
chr11:75053681-75053682	chr11:75156209-75156210
chr11:75156209-75156210	chr11:74831364-74831365
chr11:75169735-75169736	chr11:75185131-75185132
chr11:75462604-75462605	chr11:75403384-75403385
chr11:75169735-75169736	chr11:74831364-74831365
chr11:75462604-75462605	chr11:75013064-75013065
chr11:75190508-75190509	chr11:75053681-75053682
chr11:75462604-75462605	chr11:75169735-75169736
chr11:75462604-75462605	chr11:75185131-75185132
chr11:75462604-75462605	chr11:75190508-75190509
chr11:75462604-75462605	chr11:75348279-75348280
chr11:75454676-75454677	chr11:75399611-75399612
chr11:75462604-75462605	chr11:75403384-75403385
chr11:75462604-75462605	chr11:75421568-75421569
chr11:75462604-75462605	chr11:75454676-75454677
chr11:75468023-75468024	chr11:75462604-75462605
chr11:75486610-75486611	chr11:75462604-75462605
chr11:75510583-75510584	chr11:75462604-75462605
chr11:75531573-75531574	chr11:75462604-75462605
chr11:75588249-75588250	chr11:75462604-75462605
chr11:75653063-75653064	chr11:75462604-75462605
chr11:75653063-75653064	chr11:75630822-75630823
chr11:75679563-75679564	chr11:75630822-75630823
chr11:75679563-75679564	chr11:75653063-75653064
chr11:75732368-75732369	chr11:75653063-75653064
chr11:76158558-76158559	chr11:76120498-76120499
chr11:76125530-76125531	chr11:76125530-76125531
chr11:76135895-76135896	chr11:75732368-75732369
chr11:76158558-76158559	chr11:76125530-76125531
chr11:76158558-76158559	chr11:76135895-76135896
chr11:76292590-76292591	chr11:76286128-76286129
chr11:76312800-76312801	chr11:76286128-76286129
chr11:76374993-76374994	chr11:76292590-76292591
chr11:76312800-76312801	chr11:76286128-76286129
chr11:76374993-76374994	chr11:76292590-76292591
chr11:76374993-76374994	chr11:76312800-76312801
chr11:77491899-77491900	chr11:77078610-77078611
chr11:77503434-77503435	chr11:77491899-77491900
chr11:77607806-77607807	chr11:77491899-77491900
chr11:77624626-77624627	chr11:77607806-77607807
chr11:78177235-78177236	chr11:78080500-78080501
chr11:78188599-78188600	chr11:78094818-78094819
chr11:78177235-78177236	chr11:77982774-77982775
chr11:78094818-78094819	chr11:78032034-78032035
chr11:78177235-78177236	chr11:78080500-78080501
chr11:78166281-78166282	chr11:78094818-78094819
chr11:78177235-78177236	chr11:78166281-78166282
chr11:78177235-78177236	chr11:78177235-78177236
chr11:78188599-78188600	chr11:77982774-77982775
chr11:78183684-78183685	chr11:78166281-78166282
chr11:78188599-78188600	chr11:78177235-78177236
chr11:78246038-78246039	chr11:78177235-78177236
chr11:78246038-78246039	chr11:78188599-78188600
chr11:78261651-78261652	chr11:78246038-78246039
chr11:78370520-78370521	chr11:78363824-78363825
chr11:78382900-78382901	chr11:78363824-78363825
chr11:78382900-78382901	chr11:78370520-78370521
chr11:78536091-78536092	chr11:78512383-78512384
chr11:78551034-78551035	chr11:78536091-78536092
chr11:79339480-79339481	chr11:79307274-79307275
chr11:79711576-79711577	chr11:79704336-79704337
chr11:79739344-79739345	chr11:79704336-79704337
chr11:79962296-79962297	chr11:79711576-79711577
chr11:79739344-79739345	chr11:79704336-79704337
chr11:79962296-79962297	chr11:79711576-79711577
chr11:80383125-80383126	chr11:80377846-80377847
chr11:82034278-82034279	chr11:82007611-82007612
chr11:82034278-82034279	chr11:82011917-82011918
chr11:82045826-82045827	chr11:82034278-82034279
chr11:82780768-82780769	chr11:82764492-82764493
chr11:83473066-83473067	chr11:83456901-83456902
chr11:84880328-84880329	chr11:84870135-84870136
chr11:85312089-85312090	chr11:85235083-85235084
chr11:86570919-86570920	chr11:86544515-86544516
chr11:86650579-86650580	chr11:86570919-86570920
chr11:86577148-86577149	chr11:86570919-86570920
chr11:86582471-86582472	chr11:86577148-86577149
chr11:86586726-86586727	chr11:86570919-86570920
chr11:86593342-86593343	chr11:86577148-86577149
chr11:86605815-86605816	chr11:86570919-86570920
chr11:86624575-86624576	chr11:86577148-86577149
chr11:86650579-86650580	chr11:86582471-86582472
chr11:86759032-86759033	chr11:86586726-86586727
chr11:86582471-86582472	chr11:86570919-86570920
chr11:86586726-86586727	chr11:86577148-86577149
chr11:86593342-86593343	chr11:86582471-86582472
chr11:86605815-86605816	chr11:86586726-86586727
chr11:86624575-86624576	chr11:86593342-86593343
chr11:86650579-86650580	chr11:86570919-86570920
chr11:86684543-86684544	chr11:86577148-86577149
chr11:86759032-86759033	chr11:86582471-86582472
chr11:86593342-86593343	chr11:86586726-86586727
chr11:86605815-86605816	chr11:86593342-86593343
chr11:86624575-86624576	chr11:86605815-86605816
chr11:86650579-86650580	chr11:86544515-86544516
chr11:86759032-86759033	chr11:86570919-86570920
chr11:86593342-86593343	chr11:86577148-86577149
chr11:86605815-86605816	chr11:86582471-86582472
chr11:86624575-86624576	chr11:86586726-86586727
chr11:86650579-86650580	chr11:86593342-86593343
chr11:86684543-86684544	chr11:86605815-86605816
chr11:86605815-86605816	chr11:86624575-86624576
chr11:86624575-86624576	chr11:86577148-86577149
chr11:86650579-86650580	chr11:86586726-86586727
chr11:86684543-86684544	chr11:86593342-86593343
chr11:86624575-86624576	chr11:86605815-86605816
chr11:86650579-86650580	chr11:86650579-86650580
chr11:86684543-86684544	chr11:86650579-86650580
chr11:86650579-86650580	chr11:86684543-86684544
chr11:86684543-86684544	chr11:86570919-86570920
chr11:86691482-86691483	chr11:86577148-86577149
chr11:86759032-86759033	chr11:86582471-86582472
chr11:87086710-87086711	chr11:86650579-86650580
chr11:86691482-86691483	chr11:86684543-86684544
chr11:86759032-86759033	chr11:86691482-86691483
chr11:86759032-86759033	chr11:86759032-86759033
chr11:86807573-86807574	chr11:86759032-86759033
chr11:86840975-86840976	chr11:86650579-86650580
chr11:87591568-87591569	chr11:87585533-87585534
chr11:88172950-88172951	chr11:88163450-88163451
chr11:88181315-88181316	chr11:88172950-88172951
chr11:90638697-90638698	chr11:90249560-90249561
chr11:93994843-93994844	chr11:93967793-93967794
chr11:93994843-93994844	chr11:93988644-93988645
chr11:94327916-94327917	chr11:94322051-94322052
chr11:94653696-94653697	chr11:94629598-94629599
chr11:94882180-94882181	chr11:94873367-94873368
chr11:94915144-94915145	chr11:94873367-94873368
chr11:94934738-94934739	chr11:94882180-94882181
chr11:94948756-94948757	chr11:94873367-94873368
chr11:94990364-94990365	chr11:94882180-94882181
chr11:94915144-94915145	chr11:94915144-94915145
chr11:94934738-94934739	chr11:94928866-94928867
chr11:94948756-94948757	chr11:94934738-94934739
chr11:94958381-94958382	chr11:94873367-94873368
chr11:94990364-94990365	chr11:94882180-94882181
chr11:94934738-94934739	chr11:94915144-94915145
chr11:94948756-94948757	chr11:94934738-94934739
chr11:94990364-94990365	chr11:94942228-94942229
chr11:94934738-94934739	chr11:94882180-94882181
chr11:94942228-94942229	chr11:94934738-94934739
chr11:94948756-94948757	chr11:94942228-94942229
chr11:94958381-94958382	chr11:94948756-94948757
chr11:94990364-94990365	chr11:94873367-94873368
chr11:94948756-94948757	chr11:94882180-94882181
chr11:94958381-94958382	chr11:94915144-94915145
chr11:94958381-94958382	chr11:94934738-94934739
chr11:94990364-94990365	chr11:94948756-94948757
chr11:94990364-94990365	chr11:94958381-94958382
chr11:95009964-95009965	chr11:94990364-94990365
chr11:95309714-95309715	chr11:95258978-95258979
chr11:95384366-95384367	chr11:95309714-95309715
chr11:95666373-95666374	chr11:95309714-95309715
chr11:96777727-96777728	chr11:96412825-96412826
chr11:96862101-96862102	chr11:96823496-96823497
chr11:96862101-96862102	chr11:96412825-96412826
chr11:96830259-96830260	chr11:96777727-96777728
chr11:96862101-96862102	chr11:96823496-96823497
chr11:96977913-96977914	chr11:96916696-96916697
chr11:96977913-96977914	chr11:96970043-96970044
chr11:97026200-97026201	chr11:96977913-96977914
chr11:97041407-97041408	chr11:96977913-96977914
chr11:97041407-97041408	chr11:97026200-97026201
chr11:97050813-97050814	chr11:97041407-97041408
chr11:97188197-97188198	chr11:97041407-97041408
chr11:97206652-97206653	chr11:97188197-97188198
chr11:97279790-97279791	chr11:97188197-97188198
chr11:97309734-97309735	chr11:97279790-97279791
chr11:97315704-97315705	chr11:97188197-97188198
chr11:97302299-97302300	chr11:97279790-97279791
chr11:97309734-97309735	chr11:97302299-97302300
chr11:97309734-97309735	chr11:97188197-97188198
chr11:97315704-97315705	chr11:97309734-97309735
chr11:97428381-97428382	chr11:97415645-97415646
chr11:97437869-97437870	chr11:97415645-97415646
chr11:97437869-97437870	chr11:97419768-97419769
chr11:97437869-97437870	chr11:97428381-97428382
chr11:97745327-97745328	chr11:97703252-97703253
chr11:97745327-97745328	chr11:97740307-97740308
chr11:97766988-97766989	chr11:97745327-97745328
chr11:97782386-97782387	chr11:97745327-97745328
chr11:97782386-97782387	chr11:97766988-97766989
chr11:97797892-97797893	chr11:97782386-97782387
chr11:97884576-97884577	chr11:97782386-97782387
chr11:97988875-97988876	chr11:97884576-97884577
chr11:97988875-97988876	chr11:97936259-97936260
chr11:98026768-98026769	chr11:97988875-97988876
chr11:98057348-98057349	chr11:98026768-98026769
chr11:98193130-98193131	chr11:98150867-98150868
chr11:98202295-98202296	chr11:98193130-98193131
chr11:98439190-98439191	chr11:98414039-98414040
chr11:98773327-98773328	chr11:98682398-98682399
chr11:98773327-98773328	chr11:98709718-98709719
chr11:98773327-98773328	chr11:98729430-98729431
chr11:98773327-98773328	chr11:98747540-98747541
chr11:98773327-98773328	chr11:98763324-98763325
chr11:98783435-98783436	chr11:98773327-98773328
chr11:98788189-98788190	chr11:98773327-98773328
chr11:98937831-98937832	chr11:98773327-98773328
chr11:98937831-98937832	chr11:98863498-98863499
chr11:98937831-98937832	chr11:98925220-98925221
chr11:98948362-98948363	chr11:98937831-98937832
chr11:98959704-98959705	chr11:98937831-98937832
chr11:98965520-98965521	chr11:98948362-98948363
chr11:99024072-99024073	chr11:98937831-98937832
chr11:99040616-99040617	chr11:98948362-98948363
chr11:99046750-99046751	chr11:98959704-98959705
chr11:99105618-99105619	chr11:98937831-98937832
chr11:99230261-99230262	chr11:98937831-98937832
chr11:100320010-100320011	chr11:98937831-98937832
chr11:100413868-100413869	chr11:98937831-98937832
chr11:98959704-98959705	chr11:98937831-98937832
chr11:98965520-98965521	chr11:99471827-99471828
chr11:98965520-98965521	chr11:98937831-98937832
chr11:100320010-100320011	chr11:99230261-99230262
chr11:100146992-100146993	chr11:100398009-100398010
chr11:100413868-100413869	chr11:98937831-98937832
chr11:100969430-100969431	chr11:100738422-100738423
chr11:100969430-100969431	chr11:100939779-100939780
chr11:100969430-100969431	chr11:100962360-100962361
chr11:101009012-101009013	chr11:100969430-100969431
chr11:101030550-101030551	chr11:100969430-100969431
chr11:101060733-101060734	chr11:100969430-100969431
chr11:101064211-101064212	chr11:100969430-100969431
chr11:101082437-101082438	chr11:100969430-100969431
chr11:101082437-101082438	chr11:101064211-101064212
chr11:101302212-101302213	chr11:101253645-101253646
chr11:101315656-101315657	chr11:101302212-101302213
chr11:101448369-101448370	chr11:101442374-101442375
chr11:101831268-101831269	chr11:101823510-101823511
chr11:101842503-101842504	chr11:101831268-101831269
chr11:102245354-102245355	chr11:102230132-102230133
chr11:102296728-102296729	chr11:102285152-102285153
chr11:102318726-102318727	chr11:102296728-102296729
chr11:102408399-102408400	chr11:102285152-102285153
chr11:102309032-102309033	chr11:102296728-102296729
chr11:102318726-102318727	chr11:102309032-102309033
chr11:102408399-102408400	chr11:102285152-102285153
chr11:102430090-102430091	chr11:102296728-102296729
chr11:102435404-102435405	chr11:102309032-102309033
chr11:102318726-102318727	chr11:102318726-102318727
chr11:102408399-102408400	chr11:102296728-102296729
chr11:102408399-102408400	chr11:102318726-102318727
chr11:102430090-102430091	chr11:102408399-102408400
chr11:102435404-102435405	chr11:102296728-102296729
chr11:102604257-102604258	chr11:102318726-102318727
chr11:102430090-102430091	chr11:102408399-102408400
chr11:102435404-102435405	chr11:102430090-102430091
chr11:102435404-102435405	chr11:102556564-102556565
chr11:102577139-102577140	chr11:102318726-102318727
chr11:102604257-102604258	chr11:102556564-102556565
chr11:102604257-102604258	chr11:102577139-102577140
chr11:102643669-102643670	chr11:102604257-102604258
chr11:102624397-102624398	chr11:102577139-102577140
chr11:102643669-102643670	chr11:102604257-102604258
chr11:103051616-103051617	chr11:103028617-103028618
chr11:103051616-103051617	chr11:103032874-103032875
chr11:103133601-103133602	chr11:103103066-103103067
chr11:103268669-103268670	chr11:103133601-103133602
chr11:103312187-103312188	chr11:103262451-103262452
chr11:103268669-103268670	chr11:103133601-103133602
chr11:103312187-103312188	chr11:103268669-103268670
chr11:104442964-104442965	chr11:104320116-104320117
chr11:104560887-104560888	chr11:104550691-104550692
chr11:104624041-104624042	chr11:104550691-104550692
chr11:105126498-105126499	chr11:104624041-104624042
chr11:105181356-105181357	chr11:104624041-104624042
chr11:104639890-104639891	chr11:104624041-104624042
chr11:104647225-104647226	chr11:104550691-104550692
chr11:104673846-104673847	chr11:104624041-104624042
chr11:105126498-105126499	chr11:104550691-104550692
chr11:105181356-105181357	chr11:104624041-104624042
chr11:105292703-105292704	chr11:104624041-104624042
chr11:105312433-105312434	chr11:105262391-105262392
chr11:105292703-105292704	chr11:105282597-105282598
chr11:105292703-105292704	chr11:104624041-104624042
chr11:105312433-105312434	chr11:105282597-105282598
chr11:105312433-105312434	chr11:105292703-105292704
chr11:106215975-106215976	chr11:106194442-106194443
chr11:106255652-106255653	chr11:106215975-106215976
chr11:106273135-106273136	chr11:106215975-106215976
chr11:106273135-106273136	chr11:106255652-106255653
chr11:107012665-107012666	chr11:106999809-106999810
chr11:109425702-109425703	chr11:109363033-109363034
chr11:109439618-109439619	chr11:109363033-109363034
chr11:109651041-109651042	chr11:109363033-109363034
chr11:109721596-109721597	chr11:109651041-109651042
chr11:109860738-109860739	chr11:109363033-109363034
chr11:109671542-109671543	chr11:109651041-109651042
chr11:109721596-109721597	chr11:109671542-109671543
chr11:109860738-109860739	chr11:109721596-109721597
chr11:109721596-109721597	chr11:109671542-109671543
chr11:109817117-109817118	chr11:109721596-109721597
chr11:109860738-109860739	chr11:109363033-109363034
chr11:109737382-109737383	chr11:109651041-109651042
chr11:109817117-109817118	chr11:109671542-109671543
chr11:109860738-109860739	chr11:109721596-109721597
chr11:113062304-113062305	chr11:112781768-112781769
chr11:113649545-113649546	chr11:113062304-113062305
chr11:113649545-113649546	chr11:113202057-113202058
chr11:113649545-113649546	chr11:113267164-113267165
chr11:113684122-113684123	chr11:113292417-113292418
chr11:113751558-113751559	chr11:113267164-113267165
chr11:113649545-113649546	chr11:113649545-113649546
chr11:113684122-113684123	chr11:113267164-113267165
chr11:114667807-114667808	chr11:113684122-113684123
chr11:113751558-113751559	chr11:113733843-113733844
chr11:114667807-114667808	chr11:113649545-113649546
chr11:113751558-113751559	chr11:113684122-113684123
chr11:114667807-114667808	chr11:113733843-113733844
chr11:114667807-114667808	chr11:113751558-113751559
chr11:114675305-114675306	chr11:113751558-113751559
chr11:114675305-114675306	chr11:114667807-114667808
chr11:115403590-115403591	chr11:115383987-115383988
chr11:115413290-115413291	chr11:115383987-115383988
chr11:115420191-115420192	chr11:115403590-115403591
chr11:115475000-115475001	chr11:115383987-115383988
chr11:115413290-115413291	chr11:115403590-115403591
chr11:115420191-115420192	chr11:115413290-115413291
chr11:115420191-115420192	chr11:115383987-115383988
chr11:115491863-115491864	chr11:115475000-115475001
chr11:115514416-115514417	chr11:115491863-115491864
chr11:115813561-115813562	chr11:115765584-115765585
chr11:116532800-116532801	chr11:116024499-116024500
chr11:116030209-116030210	chr11:116030209-116030210
chr11:116532800-116532801	chr11:116086648-116086649
chr11:116086648-116086649	chr11:116030209-116030210
chr11:116131214-116131215	chr11:116086648-116086649
chr11:116532800-116532801	chr11:116168423-116168424
chr11:116108652-116108653	chr11:116256403-116256404
chr11:116131214-116131215	chr11:115956752-115956753
chr11:116532800-116532801	chr11:116024499-116024500
chr11:116532800-116532801	chr11:116030209-116030210
chr11:116532800-116532801	chr11:116086648-116086649
chr11:116199250-116199251	chr11:116108652-116108653
chr11:116532800-116532801	chr11:116131214-116131215
chr11:116532800-116532801	chr11:116168423-116168424
chr11:116274238-116274239	chr11:116199250-116199251
chr11:116532800-116532801	chr11:116274238-116274239
chr11:116532800-116532801	chr11:116434068-116434069
chr11:116532800-116532801	chr11:116490689-116490690
chr11:116532800-116532801	chr11:116524068-116524069
chr11:116623766-116623767	chr11:116532800-116532801
chr11:116671574-116671575	chr11:116532800-116532801
chr11:116814205-116814206	chr11:116532800-116532801
chr11:116853355-116853356	chr11:116671574-116671575
chr11:117115393-117115394	chr11:116808142-116808143
chr11:116814205-116814206	chr11:116814205-116814206
chr11:116814205-116814206	chr11:116814205-116814206
chr11:116821150-116821151	chr11:116821150-116821151
chr11:116827455-116827456	chr11:116814205-116814206
chr11:116843602-116843603	chr11:116532800-116532801
chr11:116853355-116853356	chr11:116814205-116814206
chr11:116827455-116827456	chr11:117077235-117077236
chr11:117263085-117263086	chr11:116532800-116532801
chr11:117082235-117082236	chr11:117077235-117077236
chr11:117115393-117115394	chr11:117082235-117082236
chr11:117115393-117115394	chr11:117115393-117115394
chr11:117175006-117175007	chr11:116853355-116853356
[truncated: 8,310 more rows]
