# Supplementary material for: Characterization of sequence determinants of enhancer function using natural genetic variation
Source: eLife. 2022 Aug 31;11:e76500. doi: 10.7554/eLife.76500 (PMC9662815; doi:10.7554/eLife.76500)
Supplement: Supplementary file 4. — For Fos and H3K27ac experiments, the data from ChIP-seq (wild-derived inbred strains; CAST/EiJ, MOLF/EiJ, PWK/PhJ, SPRET/EiJ) and CUT&RUN (less divergent inbred strains; 129S1/SvImJ, A/J, BALB/cJ, DBA/2 J, NOD/ShiLtJ) were merged in all rows designated "all strains". Only CUT&RUN peaks with a SNP/indel present within 60 bp of the ATAC-seq summit were included for allele-specific analyses for non-wild-derived (i.e. less genetically divergent) strains. [file elife-76500-supp4.xlsx]

## Sheet: Sheet1
Feature	Strains	Distance	Allele pairs	Allele-specific	Shared	Allele-specific & >2-fold	Allele-specific & >4-fold
H3K4me1	Wild-derived F1-hybrids	Distal	127077	16307	110770	8710	1752
H3K4me2	Wild-derived F1-hybrids	Distal	97084	29516	67568	13989	3615
H3K4me3	Wild-derived F1-hybrids	Proximal	46853	1668	45185	472	66
H3K27ac	All F1-hybrids	Distal	138622	31627	106995	17766	4847
H3K27ac	All F1-hybrids	Proximal	61288	5840	55448	1591	330
CTCF	Wild-derived F1-hybrids	Distal	47485	1234	46251	1234	1139
Fos	All F1-hybrids	Distal	85198	2120	83078	1950	1710
Tead1	Wild-derived F1-hybrids	Distal	75350	9590	65760	9401	4746
