# Supplementary material for: Characterization of sequence determinants of enhancer function using natural genetic variation
Source: eLife. 2022 Aug 31;11:e76500. doi: 10.7554/eLife.76500 (PMC9662815; doi:10.7554/eLife.76500)
Supplement: Supplementary file 5. — Positive and negative fold-changes indicate genes expressed at higher levels on the paternal, wild-derived allele and maternal, C57BL/6 J allele, respectively. [file elife-76500-supp5.xlsx]

## Sheet: B6xCAST
Gene	log2 (CAST/B6 counts)	log2 (CPM)	p-value (B6xCAST)	FDR (B6xCAST)		Gene	log2 (MOLF/B6 counts)	log2 (CPM)	p-value (B6xMOLF)	FDR (B6xMOLF)		Gene	log2 (PWK/B6 counts)	log2 (CPM)	p-value (B6xPWK)	FDR (B6xPWK)		Gene	log2 (SPRET/B6 counts)	log2 (CPM)	p-value (B6xSPRET)	FDR (B6xSPRET)
Meg3	-11.7794	10.0649	7.97806e-275	2.20689e-271		Igf2	14.0963	6.66601	2.85154e-189	2.19109e-186		Peg3os	11.9381	4.76143	9.30612e-122	3.06459e-119		Meg3	-11.0733	10.0649	1.99801e-307	6.90861e-304
Peg10	11.4161	3.87955	7.32029e-108	1.10051e-105		H19	-12.4548	7.44091	7.54401e-212	8.02625e-209		H19	-10.6592	7.44091	1.45498e-211	2.01238e-208		6430411K18Rik	-11.0245	3.62785	3.63523e-103	2.41726e-101
Igf2	11.4006	6.66601	2.82574e-112	4.82503e-110		Peg3os	11.6168	4.76143	1.10422e-111	2.58856e-109		Ifi202b	10.1853	3.46644	1.10229e-70	9.18418e-69		Rian	-10.9072	11.105	0	0
H19	-10.4801	7.44091	8.79748e-179	6.75989e-176		Meg3	-11.4854	10.0649	2.53983e-275	1.17095e-271		Peg3	9.8472	8.18704	1.29112e-219	1.98417e-216		Gpr149	-10.0252	2.70697	7.07086e-77	2.42672e-75
Cdkn1c	-9.78202	1.81178	3.27922e-61	1.63736e-59		Sgce	10.6988	5.58721	8.91997e-89	1.08221e-86		Mas1	9.65036	2.13799	6.04926e-57	3.40111e-55		Mirg	-10.0176	8.15202	1.80025e-222	1.24496e-219
Usp29	9.66416	3.55757	5.86959e-61	2.92022e-59		Mirg	-10.0487	8.15202	1.06159e-222	1.33481e-219		Igf2	9.23719	6.66601	1.75889e-192	1.73766e-189		Igf2os	9.98712	2.44522	7.20672e-75	2.33434e-73
Mir667	-9.21747	2.17814	2.83048e-45	1.04118e-43		Peg3	9.84876	8.18704	1.05497e-219	1.21595e-216		Kcnq1ot1	9.06952	9.12102	3.16181e-250	8.7462e-247		Olfr1033	-9.58258	1.30602	8.28407e-64	2.06445e-62
Mir758	-9.21747	2.31088	2.83048e-45	1.04118e-43		Rian	-9.63626	11.105	0	0		A330076H08Rik	9.04592	3.59909	3.45491e-38	1.2444e-36		Slc22a1	-9.5093	2.02853	9.02366e-63	2.18958e-61
Mir666	-9.17801	2.01776	4.2459e-44	1.51744e-42		Mas1	9.55835	2.13799	6.14158e-53	2.749e-51		Slc22a1	-8.8047	2.02853	5.12578e-32	1.51161e-30		Antxrl	-9.40543	2.78617	4.71958e-59	1.06487e-57
Mirg	-9.13196	8.15202	2.71208e-224	3.1259e-221		Mir667	-9.55126	2.17814	6.55896e-52	2.86173e-50		4930539N22Rik	-8.57818	1.84946	1.34756e-27	3.43244e-26		Nlrp5-ps	-9.37825	4.46112	3.88745e-62	9.3023e-61
Mir654	-9.03072	1.96394	5.56811e-40	1.82063e-38		Mir1197	-9.34184	1.93481	3.97771e-45	1.52821e-43		Kcnq1	8.48661	9.13426	4.75195e-250	1.0954e-246		Snhg14	9.3542	1.79251	9.13182e-60	2.09456e-58
Mir493	-8.96268	1.34673	3.24474e-38	1.01076e-36		Slc22a27	-9.24036	2.215	3.54993e-42	1.29208e-40		Snhg14	8.36703	1.79251	1.86944e-24	4.20518e-23		Mir758	-9.31515	2.31088	2.3318e-58	5.19342e-57
Mir376c	-8.90343	1.8747	9.61132e-37	2.90249e-35		Mir758	-9.19768	2.31088	5.37977e-41	1.91279e-39		Grb10	-8.03802	10.4177	2.32E-319	1.60E-315		Mir3070a	-9.17213	2.02589	2.26573e-54	4.7266e-53
Mir540	-8.86667	1.59075	7.34384e-36	2.16573e-34		Kcnq1ot1	9.16565	9.12102	5.13835e-243	1.12526e-239		Ahctf1	7.85151	7.29936	1.45902e-17	2.30768e-16		Rtl1	-9.00092	6.1642	1.08265e-179	3.94056e-177
Mir323	-8.7638	1.84987	1.66601e-33	4.56289e-32		Mir3070a	-9.03751	2.02589	7.3158e-37	2.34224e-35		Mir543	-7.84916	0.656394	2.96246e-17	4.60898e-16		Mir134	-8.8646	0.481671	2.94588e-44	5.03018e-43
Sgce	8.76235	5.58721	2.21837e-164	1.22729e-161		Mir654	-9.0131	1.96394	2.85093e-36	8.98205e-35		Mir300	-7.70685	0.811906	9.00784e-16	1.30458e-14		Mir668	-8.83492	0.457293	2.17081e-43	3.65707e-42
Mir3070a	-8.70948	2.02589	2.51177e-32	6.6172e-31		Mir376c	-8.91113	1.8747	6.58455e-34	1.96113e-32		Gm20756	-7.64575	2.35063	3.53515e-15	4.95889e-14		Cdkn1c	-8.66539	1.81178	9.21421e-39	1.36887e-37
Mir329	-8.66736	0.346915	1.9227e-31	4.92459e-30		Mir540	-8.88446	1.59075	2.56793e-33	7.57293e-32		Cdkn1c	-7.51519	1.81178	5.45982e-14	7.0773e-13		Mir1197	-8.58446	1.93481	9.77544e-37	1.37542e-35
Rian	-8.58289	11.105	0	0		Mir666	-8.8573	2.01776	1.00165e-32	2.89223e-31		Sgce	7.43197	5.58721	5.16832e-152	3.24923e-149		Zim1	-8.58223	6.05749	8.11005e-198	4.48681e-195
Kcnq1ot1	8.54486	9.12102	4.33131e-252	9.9844e-249		Mir323	-8.72831	1.84987	4.58982e-30	1.22316e-28		Ndn	7.42915	1.00378	1.79391e-13	2.23975e-12		Mir323	-8.56048	1.84987	3.70705e-36	5.13235e-35
1700025K24Rik	8.49274	0.663438	1.66789e-28	3.89671e-27		Mir382	-8.68262	1.11202	3.54176e-29	9.08834e-28		4930563M21Rik	-7.33339	0.590614	1.68187e-12	1.95151e-11		Igf2	8.52317	6.66601	1.96649e-193	8.77372e-191
Mir673	-8.40218	1.35567	1.98033e-26	4.34072e-25		Slc22a1	-8.68262	2.02853	3.54176e-29	9.08834e-28		Usp29	7.29782	3.55757	4.80355e-79	4.99533e-77		Mir493	-8.51128	1.34673	5.33328e-35	7.14773e-34
1700048O20Rik	-8.38496	1.74645	3.90704e-26	8.43031e-25		Fgl2	-8.53615	2.96153	1.63255e-26	3.8532e-25		Mir376a	-7.25374	0.506004	6.64084e-12	7.30704e-11		Clcn4	-8.50987	3.93151	5.08349e-117	4.88262e-115
Dnah8	8.31493	1.63131	2.21464e-25	4.66221e-24		Snhg14	8.36442	1.79251	4.67952e-24	1.00814e-22		Nlrp5-ps	-7.22477	4.46112	3.5691e-55	1.93585e-53		Mir654	-8.49872	1.96394	1.03878e-34	1.38281e-33
Rtl1	-8.30682	6.1642	1.80981e-157	8.93983e-155		Kcnq1	8.18169	9.13426	2.07079e-242	3.58013e-239		Mir493	-7.21219	1.34673	1.32032e-11	1.42112e-10		Mir666	-8.47325	2.01776	3.94127e-34	5.19158e-33
Snhg14	8.25701	1.79251	1.91829e-24	3.8903e-23		Lrrc72	8.1494	0.188033	6.14455e-21	1.16578e-19		Ralyl	-7.18944	5.18249	5.26928e-129	2.02443e-126		Mir667	-8.46035	2.17814	7.67744e-34	9.98933e-33
Mir1193	-8.1805	0.0855869	6.92236e-23	1.33533e-21		Rtl1	-7.91277	6.1642	1.74754e-151	8.95194e-149		Uqcrc2	7.13731	5.41325	2.91842e-11	3.05793e-10		Mir434	-8.36665	0.855995	8.18047e-32	1.01112e-30
Grb10	-8.16742	10.4177	1.06459e-299	4.9081e-296		Ndn	7.84028	1.00378	3.45024e-17	5.4914e-16		A630001G21Rik	-7.12534	0.874566	5.22548e-11	5.34964e-10		Mir376c	-8.29579	1.8747	2.29941e-30	2.74639e-29
Mir665	-8.16039	0.217369	1.36705e-22	2.61156e-21		Mir376a	-7.79033	0.506004	2.01174e-16	3.09503e-15		Igf2os	6.99873	2.44522	1.91766e-46	8.2115e-45		Mir682	-8.26644	0.0854275	8.73574e-30	1.02829e-28
Mir300	-8.14	0.811906	2.69997e-22	5.07381e-21		Clca1	7.7564	1.22249	4.40548e-67	2.76965e-65		Trim12c	-6.98439	2.56378	4.12851e-10	3.90571e-09		Mir673	-8.07658	1.35567	2.63888e-26	2.81189e-25
Atp6v0c-ps2	-8.14	0.40747	2.69997e-22	5.07381e-21		4930539N22Rik	-7.60679	1.84946	1.23533e-14	1.69839e-13		Nos1	-6.93417	0.117163	8.2313e-10	7.5797e-09		1700048O20Rik	-8.04235	1.74645	1.0042e-25	1.04665e-24
Mas1	8.1337	2.13799	1.44287e-22	2.7488e-21		Gm20756	-7.5738	2.35063	2.45562e-14	3.30065e-13		Hist1h2ad	-6.93417	0.28358	8.2313e-10	7.5797e-09		Mir494	-7.79761	0.415915	5.99335e-22	5.49695e-21
Kcnq1	8.06834	9.13426	1.06876e-251	2.11171e-248		Dedd	7.51992	4.66256	4.69195e-14	6.19221e-13		Trim12a	-6.77208	2.06624	6.54761e-09	5.54223e-08		Plagl1	7.75264	7.81738	1.26298e-192	5.29341e-190
Slc22a1	-8.03348	2.02853	8.1262e-21	1.44837e-19		Grb10	-7.38706	10.4177	1.53037e-106	3.0238e-104		Olfr1033	-6.77208	1.30602	6.54761e-09	5.54223e-08		Adgrl4	7.68113	2.41508	1.34445e-103	9.07074e-102
Mir1197	-7.96557	1.93481	6.27458e-20	1.07008e-18		Mir299a	-7.31893	0.346919	3.03545e-12	3.51325e-11		Skint6	6.77106	1.88027	4.86358e-09	4.18595e-08		4930539N22Rik	-7.61854	1.84946	5.2077e-67	1.41508e-65
Peg3os	7.81062	4.76143	4.26454e-111	7.02177e-109		Olfr1314	-7.27855	1.08575	6.04858e-12	6.84039e-11		Zim1	-6.67642	6.05749	2.93596e-137	1.35358e-134		H19	-7.548	7.44091	9.06118e-191	3.48126e-188
Rnf17	-7.68505	1.35549	1.14036e-16	1.63275e-15		Mir434	-7.27855	0.855995	6.04858e-12	6.84039e-11		Mir665	-6.45345	0.217369	2.10761e-07	1.51195e-06		Mir300	-7.47731	0.811906	7.11604e-18	5.50151e-17
A330076H08Rik	7.67998	3.59909	6.95037e-67	4.07333e-65		Inpp5d	7.19996	1.81144	1.539e-11	1.69474e-10		Sugt1	6.4375	6.25523	1.92276e-07	1.38581e-06		Gm10560	-7.45146	1.53741	1.39223e-17	1.06093e-16
Mir543	-7.65662	0.656394	2.25828e-16	3.18393e-15		Igf2os	7.17486	2.44522	2.0589e-52	9.12714e-51		Plagl1	6.38176	7.81738	4.30662e-211	5.41498e-208		Peg10	7.39808	3.87955	3.84784e-117	3.72165e-115
Plagl1	7.5854	7.81738	2.1597e-227	2.71553e-224		Mir543	-7.15013	0.656394	4.79698e-11	5.09186e-10		L3mbtl1	-6.38032	0.31101	4.23269e-07	2.92712e-06		Peg12	7.37551	0.15802	3.49772e-17	2.62348e-16
Igf2os	7.42842	2.44522	2.06395e-14	2.55564e-13		6430411K18Rik	-7.08406	3.62785	7.91088e-87	9.11794e-85		Nrros	-6.30328	0.167984	8.51081e-07	5.59206e-06		Grb10	-7.37183	10.4177	0	0
Mir376a	-7.40644	0.506004	5.38191e-14	6.44478e-13		Mest	7.06588	6.78451	1.26336e-191	1.02786e-188		A330049N07Rik	-6.22189	0.407617	1.7136e-06	1.08421e-05		Ralyl	-7.18788	5.18249	5.34588e-162	1.4219e-159
Peg12	7.3567	0.15802	8.80147e-14	1.04114e-12		Zim1	-7.04524	6.05749	3.02454e-145	1.4425e-142		Dlk1	6.18732	4.26194	7.29364e-94	1.12087e-91		Krt20	-7.16378	0.465772	1.15514e-14	7.59354e-14
Ndn	7.31945	1.00378	1.81836e-13	2.10107e-12		4930563M21Rik	-7.00917	0.590614	3.81985e-10	3.72583e-09		Il18r1	6.16783	1.9528	2.94747e-71	2.51644e-69		Sgce	7.00213	5.58721	9.5159e-156	2.23075e-153
4930412C18Rik	-7.26295	0.649149	8.35884e-13	9.32348e-12		Cdkn1c	-7.00916	1.81178	3.81985e-10	3.72583e-09		Lgals4	-6.13563	0.590593	3.45542e-06	2.10074e-05		Mir540	-6.92171	1.59075	1.29338e-12	7.56397e-12
Mir382	-7.22472	1.11202	1.66067e-12	1.81141e-11		Mir882	-6.95894	0.490014	7.63586e-10	7.22378e-09		Rhag	-6.13563	0.147848	3.45542e-06	2.10074e-05		Fabp12	-6.88356	0.620253	2.54076e-12	1.46023e-11
H2-K1	-7.10359	1.6774	1.30499e-11	1.33206e-10		Fam135b	-6.79683	0.117183	6.12187e-09	5.33533e-08		Peg10	6.11881	3.87955	4.05077e-79	4.24441e-77		Mir882	-6.84437	0.490014	4.99285e-12	2.82322e-11
Peg3	6.99293	8.18704	1.3859e-201	1.27789e-198		Apobr	-6.67774	1.68459	1.45376e-37	4.73104e-36		Mir3070a	-6.04944	2.02589	2.39355e-24	5.34817e-23		Hist1h3e	-6.80408	0.513918	9.81494e-12	5.4606e-11
Mir494	-6.97133	0.415915	1.02921e-10	9.73665e-10		A330076H08Rik	6.66477	3.59909	1.84569e-61	1.02934e-59		Depdc1a	6.00286	2.85562	7.84518e-06	4.48189e-05		Mir543	-6.80408	0.656394	9.81494e-12	5.4606e-11
Mir434	-6.97133	0.855995	1.02921e-10	9.73665e-10		Gm4349	6.66384	0.473854	2.24503e-08	1.83625e-07		Zfp960	-5.8408	0.0748331	2.86451e-05	0.00014945		Mir3070b	-6.77613	1.31077	4.21098e-43	7.03406e-42
Trim30d	-6.96663	2.13979	9.42458e-47	3.56151e-45		Mir296	6.5974	0.246143	4.67087e-08	3.68948e-07		Dlat	5.78421	4.83356	3.50608e-05	0.000180404		Ifi202b	6.71446	3.46644	9.60607e-127	1.2302e-124
Mir299a	-6.92441	0.346919	2.05054e-10	1.89199e-09		Mir493	-6.54776	1.34673	9.92654e-08	7.4983e-07		Mir3070b	-5.72742	1.31077	5.82385e-05	0.000287472		A230057D06Rik	6.66371	5.51914	5.03794e-194	2.32266e-191
Trim75	6.8821	0.44119	2.63113e-10	2.39416e-09		Ralyl	-6.49937	5.18249	1.84084e-107	3.74422e-105		Lrrc72	5.66106	0.188033	7.44275e-05	0.000361069		Chodl	-6.64654	2.79592	2.21427e-39	3.35438e-38
Gm20756	-6.87591	2.35063	4.08745e-10	3.65913e-09		A230057D06Rik	6.48528	5.51914	2.7632e-75	2.33036e-73		Mest	5.61704	6.78451	1.1878e-162	8.2142e-160		Mir1193	-6.58384	0.0855869	2.89901e-10	1.46336e-09
Apol8	-6.77373	1.44918	1.62685e-09	1.39325e-08		Mir300	-6.40499	0.811906	4.02019e-07	2.83835e-06		Jund	-5.60436	2.39643	0.000118746	0.000554295		Cntn2	6.55652	5.22323	1.07608e-192	4.651e-190
Apobr	-6.68059	1.68459	2.61231e-38	8.17441e-37		Ccdc7b	-6.32794	0.575474	8.10474e-07	5.49224e-06		Mir376c	-5.56166	1.8747	5.00584e-30	1.39028e-28		Mir382	-6.53545	1.11202	5.71391e-10	2.82146e-09
A230057D06Rik	6.46639	5.51914	6.65777e-117	1.26142e-114		Skint6	6.29605	1.88027	8.85023e-07	5.95657e-06		Peg12	5.5264	0.15802	0.000158535	0.000715401		8430436N08Rik	-6.51561	1.68805	6.00182e-36	8.26804e-35
Mir3070b	-6.43113	1.31077	3.34862e-32	8.78839e-31		Mill2	-6.2935	3.03324	1.1255e-50	4.81946e-49		1700110K17Rik	-5.46982	0.0642358	0.000242938	0.00105332		Mest	6.41455	6.78451	2.91885e-192	1.18737e-189
1700010K23Rik	-6.4181	0.905158	6.5397e-32	1.7002e-30		Mir665	-6.24653	0.217369	1.63613e-06	1.06091e-05		Klk9	-5.46982	0.390354	0.000242938	0.00105332		Mir299a	-6.3797	0.346919	4.39003e-09	2.0226e-08
Gm4349	6.32846	0.473854	1.93604e-07	1.31005e-06		Epc2	6.20973	6.90727	1.8528e-06	1.19191e-05		4933405E24Rik	5.37787	0.217245	0.000339066	0.00142024		Ndn	6.31312	1.00378	1.33398e-30	1.60298e-29
Mest	6.19997	6.78451	1.91343e-177	1.39288e-174		Nrros	-6.06849	0.167984	6.69897e-06	3.97654e-05		Slc25a2	-5.32143	0.255563	0.000499023	0.00201454		Kcnq1ot1	6.27771	9.12102	2.63375e-255	5.20392e-252
Smc2os	-6.11404	0.137806	1.70343e-06	1.00497e-05		Mir494	-5.97049	0.415915	1.35923e-05	7.67327e-05		Mir666	-5.1995	2.01776	1.21546e-32	3.68663e-31		Kcnq1	6.20977	9.13426	1.83376e-255	4.22711e-252
St6galnac5	-6.03975	1.72599	1.0578e-42	3.67597e-41		Asb4	-5.97049	0.590572	1.35923e-05	7.67327e-05		Zmynd15	-5.15601	0.0748905	0.00103007	0.00386304		A330076H08Rik	6.20893	3.59909	3.17481e-117	3.0923e-115
Klk9	-5.83839	0.390354	1.40547e-05	7.23719e-05		Plagl1	5.95613	7.81738	6.08715e-208	5.61276e-205		Mir673	-5.06153	1.35567	6.93048e-21	1.31489e-19		Mir376a	-6.20508	0.506004	3.39336e-08	1.44366e-07
Ciart	-5.83839	0.537271	1.40547e-05	7.23719e-05		Lrrc3b	-5.95357	2.74857	1.07186e-22	2.20937e-21		Meg3	-4.96286	10.0649	7.71541e-268	3.55706e-264		Hist1h2ak	-6.20508	0.127467	3.39336e-08	1.44366e-07
Slc22a27	-5.59833	2.215	4.57695e-44	1.63154e-42		Peg12	5.91467	0.15802	1.71893e-05	9.54031e-05		A230057D06Rik	4.8637	5.51914	1.94727e-60	1.19171e-58		Sycp1	6.11026	0.590408	3.76498e-45	6.58325e-44
Dlk1	5.58018	4.26194	4.69075e-130	1.27211e-127		Mir329	-5.86534	0.346915	2.76387e-05	0.000148628		C130046K22Rik	-4.84421	2.0065	3.17177e-32	9.45448e-31		Fam19a1	-6.08151	3.98509	2.9191e-105	2.0599e-103
Mir296	5.44313	0.246143	5.57178e-16	7.60744e-15		Klhl6	-5.75193	0.590405	5.63401e-05	0.000287682		Mir1197	-4.82117	1.93481	1.1554e-31	3.37137e-30		Tnfaip8l3	-6.0757	1.83129	1.33208e-07	5.35427e-07
A2m	5.28399	2.41027	2.61819e-24	5.29418e-23		Atp6v0c-ps2	-5.75193	0.40747	5.63401e-05	0.000287682		Il17d	4.81015	2.14774	0.00343476	0.0111884		Gm16070	-6.00638	2.10446	2.64313e-07	1.02943e-06
Mir882	-5.2555	0.490014	3.15064e-14	3.83933e-13		Gpr137b-ps	-5.62883	2.50484	0.000115178	0.000553325		C4a	4.81015	0.255474	0.00343476	0.0111884		Slc17a6	5.98493	0.5138	2.37161e-24	2.38039e-23
Ralyl	-5.25434	5.18249	3.93026e-87	3.93909e-85		Olfr1033	-5.49424	1.30602	0.000236258	0.00106128		Guca1b	-4.79193	1.15295	3.42046e-10	3.25367e-09		Skint6	5.83499	1.88027	7.17377e-81	2.74089e-79
Clec1a	5.23557	0.732959	7.67788e-14	9.12309e-13		Mir3070b	-5.49424	1.31077	0.000236258	0.00106128		Cnst	-4.7544	5.53995	0.00447677	0.0140819		Wdr72	-5.80983	3.6353	5.70441e-73	1.76901e-71
Fam213b	-5.2149	0.432764	0.000497405	0.00192329		Slc10a6	5.39474	0.56049	0.000348041	0.00150618		Selenbp2	-4.7544	2.50694	0.00447677	0.0140819		Kcnq3	5.70359	5.90591	5.16065e-207	3.10335e-204
Slc25a31	-5.2149	0.106737	0.000497405	0.00192329		Dlk1	5.31168	4.26194	1.75926e-68	1.17547e-66		Mir329	-4.7544	0.346915	0.00447677	0.0140819		Dlk1	5.63407	4.26194	8.68791e-78	3.04209e-76
Foxd1	5.105	2.50295	0.000730964	0.00271335		Wls	5.2291	7.74077	0.000746009	0.00296922		Mir758	-4.74975	2.31088	5.55611e-30	1.53081e-28		4930412C18Rik	-5.56408	0.649149	1.55096e-18	1.23071e-17
Olfr1033	-5.04982	1.30602	0.00102708	0.00367637		Dxo	5.2291	0.849697	0.000746009	0.00296922		Mir667	-4.71267	2.17814	3.84103e-29	1.0376e-27		Gm14139	5.55521	0.11696	2.78629e-30	3.31931e-29
Zim1	-5.00637	6.05749	2.3214e-102	3.24316e-100		Rrm2	-5.18029	2.88369	0.00100704	0.00387933		Mir882	-4.70761	0.490014	1.28148e-09	1.16683e-08		Nxph1	-5.50139	0.612989	1.6585e-05	5.17455e-05
Pcbp1	4.91834	0.544815	0.00158017	0.00541642		Myo7a	-5.1677	6.35655	6.742e-160	3.58649e-157		Zdbf2	4.70606	4.58732	4.83398e-86	6.13384e-84		Sbsn	-5.50139	0.441177	1.6585e-05	5.17455e-05
Sycp1	4.91834	0.590408	0.00158017	0.00541642		Thsd7b	5.1122	4.37553	2.32831e-134	9.47141e-132		Nedd9	4.67572	7.61879	2.80421e-09	2.47827e-08		A430093F15Rik	5.42235	0.691606	1.66284e-27	1.8399e-26
1700007B14Rik	-4.86338	0.892749	0.00213366	0.00706673		Usp29	5.09769	3.55757	3.58934e-74	2.9727e-72		Slc22a27	-4.66853	2.215	2.11352e-34	6.79815e-33		Ptpn20	5.40842	0.457409	4.13479e-38	6.00717e-37
Mir682	-4.86338	0.0854275	0.00213366	0.00706673		Krt8	4.82682	0.187956	0.0034968	0.0117161		Rian	-4.6201	11.105	0	0		Peg3	5.40274	8.18704	5.79243e-238	5.00175e-235
Cntn5	-4.86338	0.283527	0.00213366	0.00706673		Stom	-4.77845	3.12837	0.00439991	0.0142886		Caskin1	4.55737	1.36861	0.00756353	0.0222105		Ly6a	-5.39693	1.38202	3.32683e-05	9.98771e-05
Hist1h2bm	-4.77299	0.117131	3.38067e-10	3.04811e-09		4930412C18Rik	-4.77845	0.649149	0.00439991	0.0142886		C3ar1	4.55737	0.567827	0.00756353	0.0222105		Rnf125	-5.37558	1.04257	2.92212e-16	2.1039e-15
Ptpn20	4.70387	0.457409	0.00344269	0.0108316		9030624G23Rik	-4.77845	0.13751	0.00439991	0.0142886		Mir654	-4.55402	1.96394	8.57207e-26	2.01977e-24		Vmn2r29	-5.3717	0.489708	3.17637e-38	4.64402e-37
Aldh8a1	4.70387	0.106669	0.00344269	0.0108316		Gja3	-4.71825	0.432671	1.17617e-09	1.10065e-08		Thsd7b	4.52498	4.37553	2.81937e-107	7.08994e-105		Pou6f2	5.3142	2.37914	4.33832e-87	1.8869e-85
Il7r	4.70387	0.0748272	0.00344269	0.0108316		Afap1l1	-4.62869	0.85608	4.42323e-09	3.90413e-08		Mir434	-4.52258	0.855995	1.79068e-08	1.45859e-07		Gbp9	-5.2843	0.705598	6.68989e-05	0.000192131
Cntnap5b	4.68676	1.52176	9.90493e-53	4.30802e-51		Zfp783	-4.59966	2.73271	2.812e-44	1.06555e-42		Ctla2a	4.52149	2.12203	8.30865e-14	1.06208e-12		1700025K24Rik	5.18778	0.663438	3.36638e-23	3.23786e-22
Plpp7	-4.64923	0.497985	0.00446681	0.0135811		Gm15217	4.57392	0.157968	0.00767897	0.0231117		Slfn2	-4.50201	0.612675	0.00946478	0.0269523		Mir329	-5.16213	0.346915	0.000134913	0.000370014
Gm2516	-4.64923	0.246058	0.00446681	0.0135811		Chmp2a	-4.52589	2.8757	0.00932703	0.0275058		Gpank1	-4.50201	0.473834	0.00946478	0.0269523		Peg3os	5.15346	4.76143	1.1892e-126	1.50897e-124
Zfp931	-4.64923	1.27385	0.00446681	0.0135811		Ssbp4	-4.52589	2.79524	0.00932703	0.0275058		Lilrb4a	-4.50201	2.52438	0.00946478	0.0269523		Etnppl	5.13373	1.13743	4.12248e-57	8.99339e-56
A630001G21Rik	-4.59922	0.874566	4.74479e-09	3.86188e-08		Lhx6	-4.52589	0.612633	0.00932703	0.0275058		Rtl1	-4.46179	6.1642	3.76127e-141	1.85793e-138		Nptx2	-4.99899	2.05871	2.39761e-45	4.21364e-44
1810019D21Rik	4.45187	0.338025	0.00757832	0.0217145		Psma8	4.52551	1.55313	2.87712e-65	1.75302e-63		Gm3363	-4.41192	1.37744	5.66052e-13	6.82569e-12		Myo7a	-4.96706	6.35655	1.23837e-143	2.34628e-141
Cpm	-4.39765	3.47163	0.00944695	0.0262424		Zdbf2	4.44955	4.58732	3.11802e-110	6.73833e-108		Mirg	-4.38404	8.15202	1.06412e-206	1.13214e-203		Mir665	-4.88155	0.217369	0.000554616	0.00137842
Fcer1g	-4.39765	0.127397	0.00944695	0.0262424		A630001G21Rik	-4.43093	0.874566	6.22424e-08	4.85e-07		Srrm4os	-4.36635	0.785967	1.28812e-07	9.45643e-07		9030624G23Rik	-4.83706	0.13751	1.14424e-25	1.19082e-24
Nrros	-4.39765	0.167984	0.00944695	0.0262424		Ccdc178	4.40283	1.09639	3.06995e-32	8.70092e-31		Mir540	-4.34376	1.59075	6.5384e-22	1.29374e-20		Mt2	-4.8252	2.22242	2.71874e-18	2.14017e-17
Ube2l6	-4.39765	0.0534534	0.00944695	0.0262424		Mir673	-4.33049	1.35567	3.47771e-12	4.00203e-11		Zfp605	-4.32082	3.22536	1.58924e-35	5.27116e-34		Stat4	4.69444	0.590454	1.07133e-34	1.42476e-33
Rasgef1a	-4.29164	0.373233	2.4633e-07	1.64748e-06		Slc2a2	-4.28612	1.35143	6.69894e-21	1.26922e-19		Slc25a31	4.29561	0.106737	3.69159e-07	2.56833e-06		Fam84a	4.62867	0.684583	3.93845e-27	4.29257e-26
Adtrp	-4.23334	0.168021	4.74887e-07	3.02681e-06		Dnah8	4.26927	1.63131	1.08688e-37	3.56225e-36		Srrm4	-4.25193	0.90495	4.78706e-07	3.29566e-06		Lncbate1	4.61936	0.0856939	0.00144395	0.00334062
Zfp207	4.14633	7.29876	0.0169224	0.0430757		Lyn	4.26706	5.30613	0.0171058	0.0459488		Dand5	4.25068	1.48169	0.0168954	0.0441572		Gm4349	4.61434	0.473854	4.70869e-21	4.1614e-20
Lrrc72	4.14633	0.188033	0.0169224	0.0430757		Strada	4.26706	4.34342	0.0171058	0.0459488		Rbm26	4.25068	7.45155	0.0168954	0.0441572		LOC105246056	4.60739	2.23356	7.33118e-81	2.78565e-79
Gpr171	4.14633	0.168106	0.0169224	0.0430757		Cpsf3	4.26706	4.17882	0.0171058	0.0459488		Adgrl4	4.25068	2.41508	0.0168954	0.0441572		Pld5	-4.59371	3.88366	2.34829e-83	9.44161e-82
Scarna17	4.14633	0.473958	0.0169224	0.0430757		Gm6583	4.26706	0.83734	0.0171058	0.0459488		Lrriq3	4.25068	2.11968	0.0168954	0.0441572		Mas1	4.55392	2.13799	4.21425e-31	5.13544e-30
Synpr	4.10745	3.62894	4.42632e-112	7.46591e-110		1700025K24Rik	4.26706	0.663438	0.0171058	0.0459488		A230077H06Rik	4.25068	0.0855577	0.0168954	0.0441572		C130046K22Rik	-4.55245	2.0065	4.00056e-32	4.98484e-31
Snph	4.10703	3.31522	2.92862e-87	2.95662e-85		Tmem30c	-4.2017	0.0534331	8.68581e-07	5.85446e-06		Htr1b	4.25068	1.41994	0.0168954	0.0441572		4930447K03Rik	-4.53289	0.137798	0.00232555	0.00520548
C130046K22Rik	-4.08626	2.0065	4.54427e-37	1.38746e-35		Rhag	-4.2017	0.147848	8.68581e-07	5.85446e-06		Wdr83	4.25068	3.12694	0.0168954	0.0441572		1700010K23Rik	-4.53289	0.905158	0.00232555	0.00520548
Zdbf2	4.03577	4.58732	2.60004e-98	3.36086e-96		Pnp2	4.15136	0.381861	1.65679e-10	1.67508e-09		Mir323	-4.23329	1.84987	1.9336e-24	4.3415e-23		Tnfsf4	4.48168	2.34828	2.10679e-89	9.71303e-88
Cpz	-4.00124	2.53572	5.25582e-31	1.3241e-29		Klk9	-4.07179	0.390354	3.23191e-06	2.01082e-05		4921539E11Rik	4.23211	0.560486	7.39491e-07	4.91005e-06		Atp6v0c-ps2	-4.47339	0.40747	3.98136e-14	2.55527e-13
8430436N08Rik	-3.96069	1.68805	1.46029e-26	3.2264e-25		Scn7a	-4.04971	2.88215	1.65515e-39	5.69464e-38		6430411K18Rik	-4.10944	3.62785	4.82233e-74	4.35933e-72		Selenbp2	4.45076	2.50694	2.09691e-94	1.10275e-92
AY512931	-3.95988	0.641961	2.3217e-09	1.95207e-08		Sfi1	4.01964	4.42605	6.22654e-06	3.71364e-05		Hist1h2bg	-4.08434	0.568064	3.47404e-10	3.29783e-09		Rhag	-4.39142	0.147848	2.68238e-13	1.64305e-12
Impact	3.95722	7.33658	2.59548e-185	2.24363e-182		Gpr149	-3.99944	2.70697	6.95442e-38	2.29562e-36		Olfr78	-4.04709	0.73289	6.57511e-10	6.10747e-09		Trank1	4.35802	1.92259	5.01771e-68	1.40771e-66
Vsir	-3.952	1.32455	3.64053e-16	5.05544e-15		Trp53cor1	-3.98611	3.83833	8.03253e-83	8.41651e-81		Mir299a	-4.00885	0.346919	1.24336e-09	1.13436e-08		Dner	-4.34623	4.62905	2.52341e-98	1.46644e-96
Ptpn6	3.92505	0.521659	1.18841e-05	6.18858e-05		Gm3363	-3.91355	1.37744	2.83693e-12	3.29175e-11		9330159M07Rik	-3.99165	0.811699	6.5582e-06	3.78101e-05		Ccdc60	-4.30639	0.432826	8.94932e-08	3.65666e-07
Clec9a	3.92505	0.117126	1.18841e-05	6.18858e-05		Mreg	-3.85197	0.381837	2.30524e-05	0.000125626		Paqr5	-3.95064	2.55646	2.81837e-26	6.77927e-25		4930447C04Rik	-4.30377	0.958107	3.92667e-17	2.94202e-16
Stk31	3.87893	0.364508	4.72833e-18	7.33979e-17		Snph	3.84556	3.31522	1.09882e-80	1.07121e-78		Piwil2	-3.92919	0.99248	4.43383e-09	3.83517e-08		Pde6a	4.29853	0.236522	1.48105e-16	1.07869e-15
Antxrl	-3.83208	2.78617	7.09327e-24	1.41569e-22		Stmn2	-3.76455	0.246115	5.1499e-08	4.05628e-07		Cntn4	3.87707	2.74013	5.25873e-55	2.8301e-53		Abca16	4.2574	1.07468	3.04947e-50	5.87426e-49
Trim12a	-3.74192	2.06624	4.60186e-05	0.000217675		Dhdh	3.73502	0.399121	5.31962e-16	8.00606e-15		Impact	3.85512	7.33658	3.56829e-185	2.90312e-182		Mir296	4.23611	0.246143	2.838e-07	1.09951e-06
Airn	3.71166	10.0431	1.50721e-251	2.60578e-248		Kcnc2	3.70725	4.43711	7.47101e-122	2.24634e-119		Hjurp	-3.827	4.94587	8.65066e-30	2.36457e-28		Pm20d2	4.22614	0.922995	1.15846e-15	8.07594e-15
Flt4	3.69101	4.66018	2.87702e-78	2.23551e-76		Trpc4	3.6673	2.62332	2.04687e-25	4.62586e-24		Tmem150cos	3.81778	0.95225	3.27967e-08	2.60248e-07		Gm10635	-4.22027	2.70206	2.87388e-46	5.10908e-45
Hsd3b5	-3.65576	0.975364	8.81048e-05	0.000393216		1700016C15Rik	3.59807	2.59847	4.64849e-68	3.04708e-66		Cmah	-3.79085	1.71226	4.11356e-17	6.35695e-16		Zdbf2	4.21351	4.58732	1.38755e-102	9.09534e-101
Orm3	-3.60014	0.274281	3.63356e-07	2.3495e-06		Ager	-3.59252	0.521639	0.00016286	0.000758936		Zfp947	-3.7385	2.11949	7.87777e-25	1.80393e-23		Cbr2	-4.21203	1.46596	1.20063e-11	6.62912e-11
Mpp7	-3.58598	7.08735	4.50712e-176	3.1169e-173		Rnaset2b	3.58493	0.855884	0.000192479	0.00088064		Frmpd1	3.73128	0.473992	1.83531e-10	1.79014e-09		Tcerg1l	4.19197	1.9315	1.90918e-65	4.97286e-64
T2	-3.57828	0.928774	1.60073e-09	1.37343e-08		Fam110c	-3.51967	0.71922	5.05362e-09	4.4407e-08		A730017L22Rik	-3.72045	3.94413	5.70108e-70	4.61121e-68		4931423N10Rik	-4.17984	0.178027	2.25767e-11	1.21596e-10
Il33	-3.57454	2.40145	6.57409e-41	2.21771e-39		Impact	3.51092	7.33658	1.87115e-170	1.23238e-167		Gm16432	3.66825	2.56098	5.96302e-69	4.73991e-67		Slc44a5	4.17702	1.85303	4.6689e-39	6.99627e-38
Neil2	-3.51371	1.51786	1.15072e-13	1.34536e-12		Slc38a4	3.50084	5.945	1.8805e-124	6.19265e-122		Mir382	-3.6309	1.11202	1.45992e-17	2.30768e-16		Nespas	4.17271	5.2903	7.22194e-133	1.06262e-130
Ccdc68	-3.44919	3.75147	2.87892e-17	4.30003e-16		Hist1h2bm	-3.49452	0.117131	0.000311661	0.00136411		Siah3	3.61296	0.127472	4.70725e-07	3.24395e-06		Usp29	4.16986	3.55757	1.50895e-89	7.02702e-88
4921539E11Rik	3.43612	0.560486	7.99464e-21	1.42676e-19		Gm10548	-3.48143	1.59038	9.35548e-09	7.98246e-08		1700120E14Rik	3.61296	0.457645	4.70725e-07	3.24395e-06		Slc22a18	-4.16733	2.02061	1.04614e-23	1.0291e-22
Zfp783	-3.41862	2.73271	6.0198e-46	2.23817e-44		1700042O10Rik	3.47972	0.83102	0.000380677	0.00162756		Gabrb1	-3.58076	5.5495	2.61285e-103	5.73624e-101		Moxd1	-4.16721	4.54972	1.29279e-56	2.79821e-55
Gm10635	-3.40822	2.70206	4.05564e-31	1.02924e-29		Ppp1r1a	3.47972	0.117087	0.000380677	0.00162756		Kcnip4	3.57007	9.26284	2.93933e-263	1.01635e-259		C330022C24Rik	4.14942	0.779301	3.51513e-38	5.12306e-37
4930539N22Rik	-3.37987	1.84946	4.39428e-06	2.45366e-05		Mannr	-3.43487	1.86868	3.24093e-21	6.22574e-20		4933402J07Rik	3.56491	2.41246	1.77831e-60	1.09315e-58		Paqr5	-4.11809	2.55646	2.08252e-50	4.02843e-49
Katnal2	-3.37726	1.85618	3.14876e-16	4.40794e-15		4933402J07Rik	3.42333	2.41246	6.16398e-41	2.186e-39		Slc22a18	-3.55437	2.02061	2.51317e-28	6.60829e-27		Myo3a	-4.10456	0.398809	1.85893e-26	1.99001e-25
Bdkrb1	3.36761	0.449443	6.52298e-08	4.69648e-07		Cdh26	-3.39233	2.44139	1.94628e-20	3.65251e-19		2500002B13Rik	-3.5482	0.59056	3.00183e-09	2.64616e-08		Selenbp1	4.10329	1.8146	1.36307e-69	3.95233e-68
Myo7a	-3.36523	6.35655	2.10785e-141	7.87936e-139		Ecel1	3.39094	1.74977	5.12317e-16	7.72721e-15		A430093F15Rik	3.54473	0.691606	4.84206e-09	4.17262e-08		Trpc4	4.10281	2.62332	1.52639e-83	6.17295e-82
Crygn	-3.3613	0.106628	0.000613157	0.0023171		Efcab7	-3.34152	3.36416	4.64361e-33	1.34928e-31		4930447C04Rik	-3.51095	0.958107	5.55055e-09	4.73441e-08		Alpk2	4.09821	2.07172	1.79073e-75	5.93948e-74
Pirb	-3.3613	0.264946	0.000613157	0.0023171		Crmp1	-3.32642	3.51263	2.10379e-36	6.64327e-35		Gm4349	3.4985	0.473854	1.76559e-06	1.11506e-05		Nos1	-4.07218	0.117163	0.0100637	0.019825
Pgbd1	-3.34539	0.772976	6.32389e-08	4.56979e-07		Trim12a	-3.31822	2.06624	1.91158e-13	2.41673e-12		Asb4	-3.48578	0.590572	4.62924e-11	4.76392e-10		Dll1	-4.07218	0.0750373	0.0100637	0.019825
Cd38	3.32423	3.6737	9.79886e-82	8.47051e-80		A730017L22Rik	-3.30431	3.94413	6.46802e-64	3.87269e-62		4930544M13Rik	-3.48411	0.399066	0.000323156	0.00135777		Galnt18	-4.02638	9.39666	1.49521e-250	2.29781e-247
Rasl11a	-3.30264	0.274336	1.16054e-07	8.0945e-07		Airn	3.29331	10.0431	4.80824e-257	1.33005e-253		Sox30	3.48305	0.137677	0.000367597	0.00152909		Dnah7b	-4.02103	4.28593	4.65644e-92	2.30836e-90
Unc13c	3.28237	6.25188	2.4517e-147	1.09385e-144		Adamts19	3.25575	1.43284	9.78644e-11	1.0139e-09		Myrip	3.48305	0.301908	0.000367597	0.00152909		Crym	4.01503	0.597904	1.06806e-30	1.28679e-29
9330159M07Rik	-3.24808	0.811699	0.00116671	0.00412493		Abca16	3.24305	1.07468	0.00148041	0.00548794		Zfp783	-3.48167	2.73271	3.8059e-22	7.66222e-21		Gm8579	4.01312	0.567807	4.1661e-34	5.47731e-33
Slc38a4	3.24514	5.945	7.03638e-116	1.28053e-113		Il18r1	3.22465	1.9528	3.68831e-12	4.22993e-11		Fam155a	3.44417	4.42975	2.26965e-108	5.81324e-106		Tnni3k	-4.00716	3.20518	1.59854e-66	4.29309e-65
Hnmt	3.22674	0.147982	1.65045e-10	1.5372e-09		Rpl39l	-3.20765	0.106761	2.66802e-05	0.00014409		Airn	3.41045	10.0431	7.8638e-249	1.55377e-245		Cr2	4.00676	3.19142	2.58114e-110	2.09998e-108
Slc7a10	3.22666	0.236607	2.43766e-05	0.000120973		Guca1b	-3.20297	1.15295	9.45408e-09	8.05665e-08		Trim75	3.40476	0.44119	3.68108e-12	4.14601e-11		Mill2	-3.99996	3.03324	1.96637e-31	2.41321e-30
Upk1a	-3.19015	0.880753	1.02832e-08	8.1226e-08		Loxhd1	3.18855	0.053528	1.7236e-08	1.42835e-07		Ptgdr2	-3.39507	1.20271	2.85198e-10	2.72981e-09		Skap1	-3.97334	3.24908	4.54372e-82	1.77526e-80
Gria4	3.16194	3.32587	1.83609e-81	1.55798e-79		Eps8l3	-3.16665	1.13765	1.71643e-08	1.42325e-07		Hist1h2bm	-3.39305	0.117131	3.47821e-08	2.74271e-07		Adh7	3.96434	2.08063	4.76164e-06	1.59554e-05
Ovgp1	-3.15385	0.940663	1.86273e-08	1.43209e-07		Cntnap4	-3.16665	2.04545	1.71643e-08	1.42325e-07		She	3.37683	0.274364	6.61285e-10	6.1343e-09		Olfr267	-3.94858	0.117136	4.28497e-06	1.44339e-05
Thy1	-3.13345	5.40698	1.08033e-125	2.53255e-123		Slc15a2	-3.1547	0.583235	3.76148e-18	6.25301e-17		Hmha1	3.36731	2.42681	1.93377e-48	8.62771e-47		Ptprq	3.91835	5.90973	2.10576e-195	1.0787e-192
Dusp2	3.09212	0.473776	0.0028419	0.00911979		Bcl2l15	-3.13804	0.197817	4.92908e-05	0.000254381		Npy2r	3.29204	0.506065	4.62732e-11	4.76392e-10		Adgrf2	-3.89261	0.355706	3.43736e-09	1.5943e-08
Apbb1ip	-3.06382	5.93892	7.56206e-147	3.26847e-144		Tfap2e	-3.13804	0.137702	4.92908e-05	0.000254381		Mir494	-3.26492	0.415915	1.52145e-05	8.31088e-05		Bhlhe22	3.89191	0.329106	6.01097e-09	2.73479e-08
Bend6	3.0539	4.59344	3.74619e-116	6.90848e-114		L3mbtl1	-3.13804	0.31101	4.92908e-05	0.000254381		Grm1	-3.26492	0.0642299	1.52145e-05	8.31088e-05		Ttpa	-3.85233	0.998209	6.41765e-09	2.91025e-08
Sec31b	-3.04365	1.9437	5.20813e-15	6.73841e-14		Cd38	3.13281	3.6737	1.4718e-76	1.28028e-74		Kynu	-3.26492	0.449275	1.52145e-05	8.31088e-05		Gm38403	-3.85233	0.940733	6.41765e-09	2.91025e-08
6030407O03Rik	-3.03983	3.05968	1.27442e-33	3.51825e-32		1700027I24Rik	-3.13238	0.739559	1.21413e-06	8.0156e-06		Cdh26	-3.26433	2.44139	1.13202e-14	1.53801e-13		Abca6	-3.78819	1.84361	2.20506e-23	2.13424e-22
1110046J04Rik	-3.02645	2.83371	2.73833e-47	1.04914e-45		2700054A10Rik	-3.1294	1.39465	3.11044e-08	2.50264e-07		Mir296	3.2381	0.246143	2.4215e-05	0.00012788		Foxf1	-3.78308	0.246048	1.85642e-11	1.00849e-10
Cntn4	3.0255	2.74013	1.38637e-55	6.45621e-54		Ovgp1	-3.10311	0.940663	1.05156e-12	1.26142e-11		Ccdc68	-3.19453	3.75147	2.78648e-37	9.70775e-36		Erich6	-3.78308	0.805527	1.85642e-11	1.00849e-10
Spock2	-3.02387	1.15307	6.80749e-12	7.10064e-11		Sfrp4	3.09641	0.934993	2.33325e-15	3.37919e-14		Pde1c	-3.17915	3.64905	1.88436e-33	5.92332e-32		Samd3	3.74455	0.805389	3.32586e-27	3.63349e-26
Trp53cor1	-3.00598	3.83833	2.23885e-57	1.06778e-55		Aph1c	3.09624	2.60956	3.09007e-55	1.48399e-53		Trp53cor1	-3.1719	3.83833	1.95325e-68	1.53497e-66		Enpp3	3.72677	1.99818	1.78915e-29	2.08649e-28
Mab21l3	-2.99878	2.03725	1.96673e-07	1.33016e-06		Flt4	3.09607	4.66018	5.87181e-97	9.33482e-95		Ulbp1	3.1708	3.37663	1.6119e-71	1.40215e-69		Taco1	3.69742	2.55589	2.86724e-79	1.03273e-77
Gm16223	2.98049	0.178134	3.58005e-07	2.31815e-06		Skap1	-3.0946	3.24908	1.05831e-18	1.83088e-17		Fam89a	-3.16192	1.82159	2.62814e-18	4.35327e-17		Gsto1	-3.68635	7.02214	2.24782e-138	3.8862e-136
Hist1h2ak	-2.96159	0.127467	7.67691e-06	4.12507e-05		Gm15987	-3.08216	0.074979	2.21023e-06	1.4068e-05		Gm5893	3.13264	0.529491	1.5715e-06	9.99787e-06		9330102E08Rik	-3.67891	0.568049	7.71566e-08	3.17416e-07
Sntg1	-2.96159	1.33342	7.67691e-06	4.12507e-05		Kcnip4	3.07495	9.26284	1.41189e-236	2.16977e-233		Kcnc2	3.13223	4.43711	1.41841e-74	1.30787e-72		Srrm4os	-3.66986	0.785967	1.64565e-18	1.30436e-17
Pou6f2	2.96109	2.37914	1.37817e-13	1.6018e-12		Gfap	3.07257	0.23666	3.15377e-06	1.96663e-05		Hal	3.11178	1.24612	0.00283207	0.00947287		1700007F19Rik	-3.65841	0.952424	2.15205e-10	1.09551e-09
Hdhd3	2.94386	0.320095	0.005582	0.0166533		Rrp9	-3.06489	3.04883	9.08136e-05	0.000444932		Pla2g7	3.10363	2.50827	1.7835e-59	1.04524e-57		Gm20756	3.65521	2.35063	5.92785e-77	2.03951e-75
As3mt	2.91393	1.10144	3.65185e-19	5.98445e-18		Ipcef1	3.0328	0.373266	2.74097e-10	2.71564e-09		Dhrs9	-3.08693	3.18	3.70466e-38	1.33089e-36		Slc15a2	-3.64875	0.583235	5.56305e-05	0.000162052
Stpg2	-2.90619	2.67014	5.7828e-12	6.06843e-11		Gm5893	3.01647	0.529491	5.89572e-06	3.52393e-05		Slc14a1	3.0846	2.0966	2.39737e-44	9.83918e-43		Pappa2	3.62576	3.38475	1.42016e-108	1.10618e-106
Ifitm1	2.90615	0.168155	1.85774e-10	1.72419e-09		Asb2	3.00108	1.2411	0.000175186	0.000809825		Vat1l	-3.08056	2.87892	5.42018e-23	1.14278e-21		Spock3	-3.60862	5.06805	1.74986e-81	6.7984e-80
Cd53	2.89536	0.0855314	1.94181e-05	9.76981e-05		Cyp4f37	3.00108	1.17785	0.000175186	0.000809825		Cpne5	3.07864	0.1275	2.95406e-06	1.80626e-05		Mogat2	-3.5837	0.407607	2.65596e-07	1.03361e-06
2010107G12Rik	-2.88846	0.355711	0.000316718	0.00127119		Gm12709	2.98042	1.35141	3.83574e-07	2.71923e-06		Gpr149	-3.0614	2.70697	4.48927e-43	1.81553e-41		Gm16432	-3.5559	2.56098	2.02395e-14	1.31671e-13
Unc5a	-2.88461	0.843611	5.23931e-08	3.84633e-07		4932702P03Rik	-2.97613	0.568044	7.26933e-06	4.29851e-05		Trim5	-3.05578	1.23634	9.51717e-05	0.000451258		Tigd3	3.52419	0.922842	5.95483e-27	6.44454e-26
Cdk3-ps	2.8805	0.0534791	5.12972e-09	4.16369e-08		Nptx2	-2.9635	2.05871	7.13508e-10	6.79651e-09		Pon3	-3.04557	2.48171	3.01211e-22	6.11754e-21		1700061I17Rik	-3.51172	0.928889	6.69528e-14	4.24782e-13
Il18r1	2.87329	1.9528	6.84338e-15	8.78022e-14		Siah3	2.9581	0.127472	1.09882e-05	6.28651e-05		Dnah8	3.03615	1.63131	6.75491e-09	5.70722e-08		Cybrd1	3.49078	1.66692	6.42557e-37	9.08712e-36
Adgre1	-2.84278	0.910697	0.00792735	0.0225986		Lrfn5	2.9577	0.482018	2.53275e-08	2.0594e-07		Apol8	-3.02458	1.44918	5.26569e-09	4.504e-08		Tmem132b	-3.4878	0.598046	2.3086e-11	1.24194e-10
Lin28b	-2.84278	0.739421	0.00792735	0.0225986		Grin2a	2.92794	1.28831	3.61059e-18	6.00939e-17		Scn7a	-3.02274	2.88215	1.35425e-24	3.07563e-23		Stmn2	-3.48176	0.246115	9.09099e-07	3.322e-06
Pitpnm3	2.84064	2.4884	1.0246e-16	1.47617e-15		Cntn4	2.92337	2.74013	4.69323e-23	9.77591e-22		D17Ertd648e	3.02254	0.329123	5.53726e-06	3.24241e-05		S100a7a	-3.47168	0.18803	0.000199133	0.000531702
Lyz2	2.82082	0.656287	1.11558e-09	9.69199e-09		Pkp1	-2.92092	1.78629	7.41304e-30	1.95667e-28		E130006D01Rik	-3.02145	0.226876	4.28402e-06	2.5706e-05		Aqp1	3.46902	2.30002	5.71111e-13	3.42394e-12
Cyp11a1	2.8173	1.25111	0.000601639	0.0022798		Trim30d	-2.92005	2.13979	1.3129e-05	7.43295e-05		Lyz2	-3.00801	0.656287	0.00421054	0.0133446		Serpina3g	-3.46537	2.29745	3.44715e-22	3.19127e-21
Shcbp1l	-2.81104	2.09324	6.36393e-19	1.02827e-17		Slc22a18	-2.91008	2.02061	5.0159e-22	1.00253e-20		Stag3	-3.00187	1.64554	8.31509e-16	1.20678e-14		Lrrc72	3.46079	0.188033	1.2264e-08	5.42275e-08
Scn7a	-2.80269	2.88215	6.69335e-39	2.1136e-37		Elfn1	-2.90874	4.31393	3.54334e-70	2.53927e-68		Krt18	2.99086	1.95777	2.98763e-11	3.12808e-10		Serpinb1a	3.45542	2.52346	1.26595e-64	3.24848e-63
Hist1h4i	-2.8023	0.255515	0.00057647	0.00219828		A330008L17Rik	-2.90642	0.274275	0.000305417	0.00134187		1700011E24Rik	2.96325	1.57921	0.00556461	0.0170275		Bdh2	3.4495	3.69425	4.3302e-77	1.49354e-75
Mrc1	-2.8023	1.11162	0.00057647	0.00219828		Xkr5	-2.90488	1.13256	2.25276e-09	2.04583e-08		Slc15a2	-2.96151	0.583235	3.56304e-07	2.48389e-06		Kynu	3.43176	0.449275	1.01872e-18	8.1681e-18
C430002N11Rik	-2.78055	2.48998	3.27474e-28	7.57406e-27		Pld5	-2.88754	3.88366	1.50073e-32	4.29744e-31		Hydin	2.94139	0.0534256	6.55936e-07	4.3976e-06		Sema5b	3.43116	2.91654	5.09589e-75	1.66229e-73
Jakmip3	-2.77286	0.712483	2.8968e-07	1.90971e-06		Frmpd1	2.88219	0.473992	8.50331e-08	6.47629e-07		Adarb2	-2.92831	2.11987	1.4094e-27	3.58334e-26		Rab3b	-3.43045	0.940711	7.63857e-11	4.02166e-10
Frem1	-2.76324	4.63042	2.74829e-112	4.75145e-110		Tbc1d21	-2.8617	0.513793	2.36407e-05	0.000128477		Ppp1r1a	2.92013	0.117087	0.000317527	0.0013369		Mt1	-3.42207	2.31553	1.10355e-27	1.22794e-26
Dpp4	-2.7336	1.40718	5.09683e-07	3.2322e-06		Trim6	-2.82015	0.691517	0.000557155	0.00228665		Lrrc48	-2.90308	1.57563	1.21306e-10	1.2053e-09		Rbpjl	3.41455	0.963928	1.93471e-18	1.52996e-17
Tm4sf1	-2.72003	5.97046	1.6505e-112	2.88963e-110		Tex2	2.79415	5.17567	0.0111339	0.0320077		Snai3	-2.89735	0.301883	0.00031842	0.00133944		Impact	3.37628	7.33658	6.38913e-174	2.2092e-171
Btbd16	2.71354	1.10666	8.957e-14	1.05794e-12		Spx	-2.75031	1.16303	2.19458e-11	2.39002e-10		4933402D24Rik	-2.89735	0.0749493	0.00031842	0.00133944		Mannr	-3.37043	1.86868	2.36697e-12	1.36406e-11
Rhag	-2.71066	0.147848	0.00104505	0.00373781		Aldh1a7	-2.73739	0.649048	7.58929e-05	0.000376768		Rgs20	2.87558	3.18079	4.31201e-81	4.80963e-79		Rtn4r	-3.37009	2.2415	2.18844e-16	1.58806e-15
Serpina3i	2.70484	1.41603	1.10645e-11	1.13442e-10		Oprm1	2.71633	0.642066	8.66244e-10	8.15591e-09		1700040L02Rik	-2.87466	0.568049	1.13629e-06	7.34393e-06		A530072M11Rik	-3.35653	2.66689	6.80879e-42	1.10278e-40
Tnnt2	-2.69159	1.54104	8.06767e-14	9.57802e-13		Hmha1	2.71427	2.42681	1.05938e-24	2.35946e-23		Entpd1	-2.84087	2.22221	1.34508e-13	1.6928e-12		Tmcc3	-3.33097	6.31761	3.10828e-158	7.41218e-156
Pon3	-2.68763	2.48171	1.32412e-29	3.19058e-28		Rsph3b	-2.70432	0.946288	0.0146592	0.0403727		Kcnk1	-2.8372	3.22775	2.16963e-19	3.82758e-18		Sod3	-3.3309	2.62818	4.98129e-08	2.09348e-07
Hal	2.68189	1.24612	3.41229e-17	5.05303e-16		Tyro3	-2.70432	2.86786	0.0146592	0.0403727		Hnmt	2.81835	0.147982	1.67814e-08	1.37096e-07		Ntf3	-3.31757	3.74355	5.69559e-92	2.81342e-90
Gabra4	-2.67969	2.32386	1.06286e-08	8.38108e-08		Psrc1	-2.70336	4.13544	1.80337e-72	1.40126e-70		Cftr	2.81188	1.98153	4.92824e-25	1.13604e-23		C1qtnf2	-3.31392	2.04565	5.68627e-06	1.88873e-05
Ifit2	-2.65151	2.85684	3.00607e-33	8.15235e-32		Ppp1r36	2.69767	0.127409	0.000127992	0.000608128		Cd5	2.80468	2.30424	6.06369e-26	1.43854e-24		Kcnd2	-3.31187	8.92891	1.19348e-237	9.17059e-235
Fbxo32	-2.63467	4.99301	5.49684e-77	4.06561e-75		9430041J12Rik	2.69767	0.178102	0.000127992	0.000608128		Adgrf5	-2.80405	3.19266	1.38241e-08	1.13675e-07		Plac8	-3.30788	2.69307	4.37364e-55	9.2213e-54
Rasgrp1	2.63336	0.158052	3.78444e-08	2.82933e-07		Cpsf4l	-2.68493	3.14798	1.81957e-28	4.57573e-27		Nckap1l	2.79765	0.837085	0.010897	0.0304294		Thsd7b	3.30661	4.37553	2.03034e-47	3.66602e-46
Actl7a	2.62285	0.197783	0.000224718	0.000932236		Mir6346	2.68312	0.0534972	1.44979e-05	8.138e-05		E230016K23Rik	2.79531	0.568092	1.98941e-09	1.78325e-08		Trim30a	-3.30472	1.7362	3.79522e-21	3.37567e-20
Gm16938	-2.61861	0.992593	3.19779e-08	2.41028e-07		Cftr	2.68071	1.98153	8.98279e-26	2.07414e-24		Pou1f1	2.78377	0.537375	3.04507e-08	2.42606e-07		Ecel1	3.29451	1.74977	5.76606e-22	5.29551e-21
P2rx6	-2.61861	1.42448	3.19779e-08	2.41028e-07		2500002B13Rik	-2.67098	0.59056	0.000135233	0.000640333		Styk1	-2.76003	3.00704	7.94213e-16	1.15629e-14		Stmn4	3.29323	2.06627	2.01334e-69	5.82564e-68
4930513N10Rik	-2.59631	1.87443	3.86782e-07	2.49398e-06		Lbp	2.66763	1.34721	3.02741e-28	7.55815e-27		1700010K23Rik	-2.73675	0.905158	5.15189e-07	3.52926e-06		0610031O16Rik	3.29116	2.29085	1.00304e-05	3.23455e-05
Dnah7c	-2.58232	1.52168	2.08406e-12	2.25193e-11		B3gnt5	-2.65547	4.15017	2.94238e-34	8.84697e-33		Stk31	2.7303	0.364508	0.0011237	0.00417681		Ifi44	-3.28946	1.08037	9.05533e-08	3.69343e-07
Gm21944	-2.57346	0.373107	3.4129e-05	0.00016586		Moxd1	2.64899	4.54972	6.61097e-112	1.57649e-109		Spx	-2.72877	1.16303	7.99637e-05	0.000385896		Hist1h2ad	-3.28946	0.28358	9.05533e-08	3.69343e-07
Terb1	-2.56915	3.1179	9.81165e-16	1.31752e-14		Adtrp	-2.63984	0.168021	1.84494e-05	0.000102029		Lingo2	-2.72463	6.65617	1.93416e-123	6.68783e-121		Ifi204	3.27383	1.99195	3.83657e-64	9.68314e-63
Ptprn2	2.56039	2.0963	3.52582e-35	1.00548e-33		Tuba8	-2.6203	0.399019	2.55553e-06	1.61248e-05		Pcolce2	-2.72095	2.61997	1.56671e-26	3.82848e-25		Cilp	-3.26981	0.346937	0.000708727	0.00172851
Ecel1	2.55731	1.74977	2.57136e-19	4.25413e-18		Vwf	2.6197	0.355585	0.00216839	0.00774561		Lrrc3b	-2.71965	2.74857	4.41308e-11	4.55502e-10		Tnfsf13b	3.26736	2.22189	3.57781e-57	7.8175e-56
Kcnt1	-2.55483	1.13247	9.52836e-08	6.69648e-07		Scn8a	2.61698	0.905153	3.304e-15	4.74535e-14		Pitpnm3	2.7144	2.4884	1.51339e-33	4.76804e-32		Lrrc9	-3.25333	0.168127	1.04373e-05	3.35639e-05
A730017L22Rik	-2.52176	3.94413	4.24348e-65	2.39558e-63		Sema7a	-2.61331	5.85265	2.00288e-110	4.39712e-108		9530062K07Rik	-2.71128	0.892985	6.19549e-09	5.26674e-08		Gapdhs	-3.25222	4.24628	1.91159e-66	5.12388e-65
Lin7a	2.5203	3.73492	1.55817e-86	1.55043e-84		Cyp2d22	2.6009	2.67596	5.8103e-15	8.1669e-14		Spats2	2.70378	5.58618	0.000121836	0.000565666		Serpina3n	3.24813	0.187912	3.23678e-14	2.08514e-13
1700112J05Rik	-2.51742	0.0961488	5.95477e-05	0.000274718		St8sia4	2.59034	0.560437	6.25982e-07	4.31818e-06		Unc5a	-2.69637	0.843611	9.03712e-07	5.9182e-06		6030407O03Rik	-3.23289	3.05968	3.8524e-67	1.05094e-65
Snai3	-2.51411	0.301883	0.000440798	0.00172125		Dsc2	2.59034	0.320113	6.25982e-07	4.31818e-06		C330022C24Rik	-2.6942	0.779301	0.0149653	0.03992		4933405E24Rik	3.23003	0.217245	1.11692e-15	7.80604e-15
Gm10560	-2.48011	1.53741	2.34745e-14	2.89889e-13		Hist1h2ad	-2.58967	0.28358	7.19357e-09	6.2145e-08		E2f2	-2.6942	1.4939	0.0149653	0.03992		5430437J10Rik	-3.2096	1.6386	4.82935e-09	2.21395e-08
1700015F17Rik	2.47778	1.05349	3.90352e-10	3.50127e-09		Mcoln2	2.57943	2.0481	3.2865e-17	5.24286e-16		Vash2	-2.6942	4.62831	0.0149653	0.03992		Gstt1	3.20954	1.64896	1.22693e-41	1.97321e-40
Pcdh15	-2.47442	2.17046	1.28854e-23	2.54961e-22		C130046K22Rik	-2.56963	2.0065	6.20836e-07	4.28696e-06		Zfp931	-2.6942	1.27385	0.0149653	0.03992		AY512931	-3.19331	0.641961	2.42548e-12	1.39604e-11
Ampd1	-2.47254	1.31549	1.42134e-05	7.31074e-05		Stag3	-2.56916	1.64554	4.46898e-13	5.50895e-12		Stxbp5l	2.67475	0.0534582	1.79052e-07	1.29455e-06		Tmc2	-3.19009	0.0534711	1.91171e-05	5.90988e-05
Trat1	-2.47254	0.246108	1.42134e-05	7.31074e-05		Gm3604	-2.55129	1.6419	7.63808e-13	9.26687e-12		1700015F17Rik	2.65918	1.05349	4.92627e-13	5.96631e-12		Cntnap3	-3.18988	2.75965	6.70276e-41	1.05829e-39
4930563M21Rik	-2.45355	0.590614	4.80421e-07	3.05825e-06		Ddc	2.54995	2.9964	1.11332e-06	7.39238e-06		Rnaset2b	2.62511	0.855884	0.00209843	0.00726676		Slc24a2	-3.17509	2.1981	8.68066e-09	3.89307e-08
Adcy10	2.45178	1.31108	8.37731e-16	1.13483e-14		Pou1f1	2.54024	0.537375	2.7259e-08	2.20479e-07		Shcbp1l	-2.61811	2.09324	3.41828e-20	6.287e-19		Fam110c	-3.16958	0.71922	4.32792e-12	2.45527e-11
Tagap	2.44766	1.52943	1.41632e-10	1.32628e-09		Aox2	-2.52821	0.0643161	0.000424029	0.00179405		Lockd	2.6058	2.26947	3.92855e-14	5.13571e-13		Fpr1	3.16782	0.952193	7.00462e-26	7.32836e-25
Gm973	2.42906	1.7227	1.18602e-09	1.02781e-08		Pik3cb	-2.52524	5.26533	0.00329549	0.0111171		Luzp2	2.59896	4.09126	3.23695e-79	3.41757e-77		Stk33	-3.15756	0.465726	2.57235e-10	1.30227e-09
Ctla2a	2.41863	2.12203	1.06787e-11	1.09812e-10		Tlr3	-2.52524	0.117091	0.00329549	0.0111171		Sphkap	2.59722	0.44116	5.74894e-07	3.89641e-06		Hfe	-3.15718	0.147977	0.00133355	0.00310615
Tmem141	2.41605	1.251	2.23104e-12	2.40511e-11		4930471L23Rik	-2.52524	0.381803	0.00329549	0.0111171		Adcyap1r1	2.59104	5.16151	3.33883e-55	1.81809e-53		Ovgp1	-3.14547	0.940663	7.71262e-12	4.31177e-11
Tub	2.41178	1.39488	9.78707e-14	1.15009e-12		Srcin1	2.52057	0.63491	1.44168e-10	1.47157e-09		Cd1d1	-2.58902	1.12235	5.59972e-08	4.30277e-07		E030011O05Rik	-3.14336	4.09712	1.09686e-91	5.36065e-90
Slc22a4	2.40203	2.52525	4.26793e-10	3.81576e-09		Misp	2.50898	1.35143	3.04532e-11	3.29062e-10		Loxhd1	2.58833	0.053528	5.02199e-06	2.97088e-05		Pla2r1	-3.13827	3.74713	6.36836e-70	1.85824e-68
Fgd5	-2.40111	0.843621	2.44561e-10	2.23269e-09		Hcn4	2.50782	0.407577	8.48638e-05	0.000419197		P2rx7	2.58833	0.560446	5.02199e-06	2.97088e-05		Col9a1	3.12726	1.45759	6.82146e-22	6.24819e-21
4930544M13Rik	-2.39837	0.399066	0.000179023	0.000757672		Rbm44	2.50621	0.147864	0.00401539	0.0132231		Adgrb3	2.58376	2.33624	9.41346e-38	3.35561e-36		A530065N20Rik	3.12201	1.17322	3.79835e-08	1.61249e-07
Abcc2	-2.39461	0.117135	0.00604745	0.0178362		Rasgef1c	2.50621	0.283553	0.00401539	0.0132231		Gfap	2.55683	0.23666	1.02521e-06	6.66339e-06		Adamts18	-3.11135	3.57405	4.22925e-78	1.49603e-76
Lrrn1	-2.39127	1.86553	6.00097e-11	5.80416e-10		Pitpnm3	2.49817	2.4884	4.98202e-29	1.27131e-27		Ccdc173	-2.5447	1.90805	6.21367e-12	6.8753e-11		Pard6a	-3.11066	0.137726	9.70893e-07	3.53008e-06
Ccdc82	2.3874	5.11133	2.64201e-24	5.33454e-23		4930481A15Rik	-2.47271	1.29273	4.4411e-11	4.72863e-10		Rbpjl	2.52623	0.963928	3.12229e-12	3.5397e-11		Vstm2b	3.08903	2.09593	1.37298e-51	2.70508e-50
Cdpf1	2.37871	1.74639	1.27824e-14	1.60285e-13		Sox5os3	-2.47142	1.10127	9.86327e-05	0.000480517		Ecscr	-2.52324	1.13246	1.16723e-06	7.52282e-06		Foxd1	3.0873	2.50295	1.87692e-80	7.03514e-79
Lrrc2	2.37853	0.449255	1.00961e-05	5.32773e-05		Nespas	2.46683	5.2903	1.60141e-90	2.03203e-88		Gm2516	2.51432	0.246058	8.03213e-05	0.000387351		Alk	3.08564	4.35039	5.66447e-90	2.6739e-88
Cyp2ab1	2.37848	0.0534713	5.06623e-05	0.000237408		Ntf3	-2.45924	3.74355	2.92787e-29	7.58341e-28		Cpne4	2.51165	0.29274	0.00389623	0.0124878		9430041J12Rik	3.07761	0.178102	2.23781e-06	7.80217e-06
Mt1	-2.37281	2.31553	1.21288e-26	2.69266e-25		Vwa3a	-2.45115	0.292717	0.000745586	0.00296922		Krt8	2.51165	0.187956	0.00389623	0.0124878		She	3.07212	0.274364	7.25548e-05	0.000206951
Cd101	2.36364	1.13781	2.19424e-14	2.71453e-13		Hlf	2.44749	1.46603	8.70571e-13	1.05069e-11		Pisd-ps1	2.5051	3.83658	3.30184e-36	1.12482e-34		Nfkbid	-3.06887	1.09096	1.45798e-09	6.99458e-09
Sdsl	2.35673	0.759706	2.64104e-10	2.40159e-09		Entpd2	2.4443	0.473988	0.000151565	0.000709889		Mttp	-2.48316	2.2222	3.56016e-15	4.98891e-14		Kcnd3	3.0625	4.26557	1.97317e-107	1.47518e-105
Cd74	-2.35584	0.399019	0.0013496	0.00469594		Gm6093	2.44312	0.691784	1.608e-10	1.62765e-09		Hlf	2.48211	1.46603	2.70465e-16	4.03103e-15		Spink10	-3.05873	3.95631	4.01702e-61	9.40092e-60
Gabrb1	-2.35096	5.5495	1.1672e-92	1.42863e-90		Clec1a	2.43586	0.732959	3.05902e-08	2.46702e-07		1700016C15Rik	2.47904	2.59847	1.9953e-12	2.29783e-11		Ptger3	3.05465	0.911025	1.45918e-10	7.54184e-10
Acad12	2.34605	3.34757	1.5893e-53	7.11381e-52		B230217O12Rik	-2.42569	1.6915	1.59826e-13	2.0355e-12		Ovgp1	-2.47555	0.940663	1.43383e-05	7.87895e-05		Lrrc2	3.05424	0.449255	1.23994e-17	9.47489e-17
Fst	-2.32599	4.73855	1.08032e-65	6.17435e-64		1700061I17Rik	-2.42403	0.928889	2.56679e-08	2.08341e-07		Plac8l1	2.47249	0.552824	3.22666e-06	1.96339e-05		Lipo3	-3.03501	0.946681	0.00250403	0.00557253
Zmat4	-2.32186	0.627532	7.1562e-05	0.00032486		Sod3	2.41832	2.62818	4.67459e-54	2.16961e-52		Psrc1	-2.47212	4.13544	1.39551e-60	8.61666e-59		Klhl30	3.03232	1.6703	5.83583e-42	9.48477e-41
Car2	2.32023	2.79275	6.26223e-27	1.40605e-25		4933431E20Rik	-2.41822	2.10926	1.09913e-12	1.31733e-11		A330008L17Rik	-2.46306	0.274275	0.000104209	0.000491415		Mx1	3.02168	0.47395	4.24286e-06	1.4299e-05
4921509O07Rik	2.31483	1.14284	2.52631e-07	1.68718e-06		Gsta3	2.41544	1.66003	6.45887e-16	9.66803e-15		Clca3a1	-2.45841	4.75711	1.55717e-77	1.54944e-75		Tnfaip2	-3.01586	3.5646	4.50545e-50	8.64284e-49
Spx	-2.31264	1.16303	1.93275e-09	1.642e-08		Dapk2	-2.41061	1.1376	0.000171029	0.000793792		Asic2	2.44503	1.42462	8.79137e-21	1.65433e-19		Igfbp2	3.01015	6.13744	9.02957e-170	2.90437e-167
Miat	2.30688	0.0643004	1.24196e-06	7.45228e-06		Nova2	-2.41018	0.998191	5.4466e-06	3.27388e-05		Arhgap22	-2.44306	5.58986	1.83741e-90	2.54132e-88		Tuba8	-3.00656	0.399019	4.59671e-09	2.11079e-08
Gm6093	2.3062	0.691784	3.76634e-09	3.09889e-08		Vat1l	-2.40952	2.87892	1.24928e-17	2.03759e-16		Olfr1314	2.4414	1.08575	1.60678e-18	2.68398e-17		Clec9a	2.99386	0.117126	2.53179e-07	9.86956e-07
Spp1	-2.29785	4.06505	7.54488e-70	4.80891e-68		Gpr61	2.38303	0.117102	0.00738717	0.0223571		Fgfbp3	-2.42702	0.568042	2.46656e-05	0.000130053		Lyz2	-2.99296	0.656287	3.80253e-13	2.30771e-12
Edar	2.29667	0.779597	6.15088e-06	3.3546e-05		Car15	-2.37963	1.7158	8.81002e-11	9.16865e-10		Samd12	-2.40994	6.21553	3.32052e-107	8.20108e-105		Lrrc3b	-2.99155	2.74857	2.49652e-73	7.86546e-72
Lsmem1	-2.28851	3.49872	7.73545e-25	1.59685e-23		Eci3	2.37787	0.0534861	0.000269315	0.00119618		Plvap	-2.40288	0.449317	0.0060699	0.0183825		Hist1h2bg	-2.989	0.568064	1.58525e-07	6.32043e-07
Nxph1	-2.27174	0.612989	0.0107287	0.0292854		St6galnac3	2.37787	5.80618	0.000269315	0.00119618		Ppdpf	-2.40288	0.946509	0.0060699	0.0183825		Gm12709	2.98198	1.35141	3.13592e-11	1.67787e-10
9030625G05Rik	-2.26859	0.187992	0.000528181	0.00203263		Cmah	-2.3777	1.71226	3.07576e-07	2.20762e-06		Unc13c	2.40265	6.25188	2.43204e-130	9.89341e-128		3632451O06Rik	-2.98045	2.64051	1.79721e-18	1.42285e-17
C920006O11Rik	-2.26668	0.874683	3.81161e-07	2.46003e-06		Slc35f2	2.37427	0.824778	3.98487e-09	3.53753e-08		Tmem236	-2.40226	0.799052	0.000180234	0.000804654		Ret	-2.97563	4.72193	3.68688e-52	7.36897e-51
Fam89a	-2.26598	1.82159	1.89569e-11	1.90536e-10		Kcnk12	-2.35757	1.92575	1.76523e-08	1.46022e-07		Znrd1as	2.38351	0.481964	5.02672e-05	0.000251124		Cxcl17	2.97423	1.17804	5.81216e-19	4.69556e-18
Col15a1	2.26231	3.80957	3.36969e-72	2.21934e-70		Slc6a17	-2.35626	5.19722	5.47897e-69	3.75147e-67		Igflr1	-2.38019	1.6275	4.19011e-10	3.96127e-09		Pip5kl1	2.9721	0.0961307	1.95535e-12	1.13252e-11
Fmod	-2.2619	4.17152	2.1679e-83	1.98571e-81		Lin28b	-2.34712	0.739421	0.000295174	0.00130018		Unc93b1	-2.37554	2.55466	1.22791e-15	1.77094e-14		Trp53cor1	-2.96933	3.83833	6.62386e-61	1.53974e-59
Sfi1	2.25715	4.42605	4.90129e-78	3.78714e-76		Ttc23l	2.34705	4.09635	1.54234e-68	1.03554e-66		4933413L06Rik	-2.37554	2.0344	1.22791e-15	1.77094e-14		Grhl3	2.96729	3.11453	4.68241e-62	1.11659e-60
Dsp	2.24363	1.17283	0.0132002	0.0348886		Rgl3	-2.3447	0.837306	5.20216e-07	3.63022e-06		Pask	2.37097	3.66467	6.45695e-64	4.29356e-62		Rgs7bp	2.95769	4.49528	9.49925e-62	2.24588e-60
Lyve1	2.24363	0.283467	0.0132002	0.0348886		Mogat2	2.34319	0.407607	1.59757e-07	1.18541e-06		S100a7a	-2.33878	0.18803	0.000310262	0.0013111		Best3	2.95612	2.79028	9.29221e-73	2.86876e-71
Qsox2	2.24363	3.67481	0.0132002	0.0348886		Gm38403	2.32905	0.940733	1.87555e-05	0.000103515		Tnr	2.33595	0.311092	1.75044e-05	9.47194e-05		Onecut2	2.95416	1.32436	8.54514e-34	1.10766e-32
Necab1	2.24331	1.68815	1.67047e-19	2.787e-18		Cpxm2	-2.32807	4.95507	3.23423e-71	2.47142e-69		Ccdc62	-2.3351	2.84047	2.96292e-20	5.46402e-19		Kbtbd11	-2.94144	1.73981	1.43879e-08	6.33481e-08
A330033J07Rik	2.23841	2.21505	1.08369e-34	3.05265e-33		Ccdc30	-2.32687	2.59611	1.84567e-15	2.6871e-14		Vstm5	-2.31762	1.40332	8.08123e-09	6.77814e-08		Syndig1	-2.9327	6.33539	1.67078e-86	7.15433e-85
Brinp1	-2.23115	7.71682	1.00286e-131	3.08234e-129		Trim75	2.32066	0.44119	9.36933e-05	0.000457905		Nat8l	2.3104	0.898944	1.22789e-06	7.89534e-06		Arhgef16	2.9319	2.38628	2.07327e-24	2.08397e-23
Mmp9	2.23051	1.29252	2.60735e-07	1.7346e-06		Cntn2	2.31211	5.22323	1.31229e-13	1.68213e-12		Gm10635	-2.30788	2.70206	7.75947e-23	1.62855e-21		Cyp4f37	2.91591	1.17785	4.13353e-30	4.89896e-29
Cyb561	-2.22677	0.481894	1.12305e-05	5.87478e-05		Serpina3i	2.30875	1.41603	6.20234e-13	7.58484e-12		Add2	2.30054	0.705558	6.08981e-06	3.53751e-05		C130060C02Rik	-2.9091	3.0403	2.47699e-22	2.30857e-21
Ak7	-2.22197	1.60546	3.57233e-09	2.94802e-08		Gstm4	2.30822	0.998103	0.000475907	0.0019874		C130083M11Rik	-2.28913	2.6274	9.69452e-17	1.47023e-15		Dhrs9	-2.90881	3.18	5.41925e-16	3.8497e-15
Slc29a4	-2.22054	1.13245	4.77828e-05	0.000225634		Rasl12	-2.30674	0.69864	2.08517e-07	1.53078e-06		Pcdh15	-2.28665	2.17046	1.95058e-10	1.89989e-09		Hist1h2bl	-2.90512	0.158063	0.000209798	0.000557497
Hmha1	2.21876	2.42681	4.81485e-10	4.27708e-09		Rnu3a	2.29764	5.01239	8.74131e-96	1.35844e-93		Nespas	2.28613	5.2903	1.14425e-88	1.52174e-86		Rbpms2	-2.9013	4.27292	1.51802e-91	7.34119e-90
9130019O22Rik	-2.21519	1.96676	7.56194e-15	9.66628e-14		Vstm5	-2.29624	1.40332	6.91978e-10	6.60051e-09		Aqp7	-2.27495	0.16801	0.00235279	0.00806678		Kcnh5	2.90036	1.19799	3.21635e-09	1.49833e-08
Fgfbp3	-2.21416	0.568042	6.09496e-08	4.41589e-07		Ccdc64b	-2.29265	3.44244	6.66699e-20	1.22134e-18		Gm15850	-2.27079	1.04796	0.000122516	0.00056825		Olfr78	2.90036	0.73289	3.21635e-09	1.49833e-08
Pde11a	-2.2046	2.04263	2.05971e-12	2.2291e-11		Sytl1	-2.28872	1.07484	0.0104861	0.0304054		AI504432	2.26905	0.24604	0.000154709	0.000701566		Myrip	2.8997	0.301908	1.22191e-11	6.73587e-11
Col6a4	-2.2029	0.137719	1.05651e-06	6.43163e-06		A2m	2.28802	2.41027	1.26844e-35	3.96021e-34		Ifitm1	2.26905	0.168155	0.000154709	0.000701566		Angptl6	-2.87923	2.48816	8.7937e-17	6.45914e-16
Gm3604	-2.20121	1.6419	8.39419e-12	8.70315e-11		Alpk3	2.28784	0.597973	0.00247927	0.0086834		Gbp7	-2.26751	1.30199	9.2954e-08	6.93819e-07		Slc25a34	2.8792	0.449294	8.71908e-14	5.49652e-13
Adgrb3	2.19957	2.33624	3.60173e-20	6.24254e-19		Pax8	2.28515	1.35134	8.0304e-14	1.04683e-12		Pmaip1	-2.25977	5.3025	2.7712e-71	2.38065e-69		Sfrp2	-2.8791	2.28628	2.29818e-09	1.08485e-08
A330093E20Rik	2.19372	1.50594	8.31389e-17	1.20031e-15		Tmem132cos	-2.28347	0.338087	0.00226778	0.00804659		Blnk	2.25384	0.0749164	0.013158	0.0357261		A630020A06	2.87721	0.88692	1.39452e-12	8.13482e-12
Kcnmb2	2.18868	0.355684	0.00427478	0.0130951		A430093F15Rik	2.2805	0.691606	3.25873e-05	0.000173419		Katnal2	-2.2501	1.85618	1.9295e-12	2.22576e-11		Scel	2.87625	3.2681	4.168e-97	2.35296e-95
Hist1h2ab	-2.18525	0.236555	1.8752e-05	9.46221e-05		Zfp429	-2.27899	1.5524	0.000115644	0.000555179		E030011O05Rik	-2.23903	4.09712	1.8022e-61	1.1228e-59		Scd3	-2.86925	0.236441	5.78898e-13	3.46871e-12
Abca6	-2.18147	1.84361	4.98897e-17	7.27873e-16		Abcb1a	2.27489	1.14295	2.88746e-14	3.86232e-13		Kng2	-2.22802	1.56794	2.16077e-10	2.09576e-09		Hist1h4c	-2.86461	1.62406	8.83382e-07	3.23315e-06
Npy2r	2.1767	0.506065	5.39629e-08	3.95318e-07		Sepp1	2.26527	3.33549	1.48458e-47	6.07493e-46		F2	2.21366	0.424452	1.81343e-05	9.77992e-05		Kcns3	-2.85978	3.93786	2.53621e-65	6.5813e-64
Slc22a18	-2.17435	2.02061	2.29852e-10	2.10118e-09		Ildr2	-2.26441	4.2928	2.70139e-22	5.46242e-21		Skap1	2.21358	3.24908	5.76792e-43	2.32584e-41		Inhbb	-2.85795	0.283497	2.09062e-10	1.0662e-09
Cfap77	-2.17204	0.301974	8.00479e-05	0.000360515		Styk1	-2.2599	3.00704	2.30991e-14	3.11085e-13		Tnfrsf18	-2.21035	2.35139	1.27979e-13	1.61357e-12		Serpina3i	2.85501	1.41603	4.58657e-18	3.5739e-17
Arhgap22	-2.1674	5.58986	6.19191e-82	5.38618e-80		Ppp1r14c	2.25074	0.590628	1.13482e-05	6.48046e-05		Egfl8	2.20822	0.874648	0.000269246	0.00115615		Pzp	2.85322	0.364518	1.64728e-06	5.83746e-06
Fam26e	2.15872	0.36457	0.00140687	0.00487314		Ankrd13c	-2.23661	5.85644	1.0511e-05	6.0423e-05		Gda	-2.20715	1.76643	7.80218e-16	1.13711e-14		Avpr1a	2.85286	1.56033	1.36964e-22	1.29307e-21
A630066F11Rik	-2.15358	0.264967	0.000346131	0.00137884		Capzb	2.23504	8.23273	0.000835959	0.0032875		Selenbp1	-2.20277	1.8146	0.000905199	0.00344519		Ntm	2.85129	2.73276	1.72151e-47	3.11244e-46
4933431E20Rik	-2.14945	2.10926	8.8073e-14	1.04114e-12		Kcnd2	-2.2294	8.92891	4.77799e-197	4.13027e-194		Gm10584	2.19598	0.246032	0.00425647	0.0134779		Henmt1	-2.85063	0.246117	1.79113e-05	5.56326e-05
9530062K07Rik	-2.14928	0.892985	6.90976e-07	4.29909e-06		Mak	-2.22291	0.575523	0.000196033	0.000895123		Tmem132cos	-2.18701	0.338087	1.89298e-05	0.000101638		Ankrd6	-2.84502	3.67307	2.63783e-63	6.49178e-62
4933416M07Rik	-2.13743	0.732714	0.0188932	0.0473392		Tmem132b	-2.22291	0.598046	0.000196033	0.000895123		A2m	2.18681	2.41027	5.55961e-22	1.108e-20		Fam26e	-2.82412	0.36457	0.000378997	0.000970184
Gm5907	-2.13743	0.178123	0.0188932	0.0473392		4933406C10Rik	-2.22288	2.01746	5.51403e-08	4.32829e-07		Adgrg7	-2.17685	2.31738	9.86755e-09	8.17723e-08		Sgca	-2.82412	0.274336	0.000378997	0.000970184
Baat	2.1269	0.197808	0.000157758	0.000674942		Hgd	-2.218	0.590662	2.31113e-07	1.68327e-06		Slc25a21	2.17645	2.94812	1.03175e-32	3.1432e-31		Tmem150cos	2.80749	0.95225	2.00109e-19	1.65138e-18
Gif	-2.12598	0.856047	0.00152454	0.00524395		Snai3	-2.21109	0.301883	0.000865614	0.00339159		2010001A14Rik	-2.17458	1.92299	2.34599e-10	2.27064e-09		Ly6e	-2.80704	2.31102	1.74501e-22	1.63851e-21
Prkar1b	-2.1242	4.03689	3.95829e-33	1.06928e-31		Lgals9	-2.21047	2.81348	1.46456e-17	2.38029e-16		Gm10560	-2.16948	1.53741	4.06919e-08	3.18151e-07		Sult4a1	2.8004	1.47773	3.36435e-32	4.20346e-31
Ptprr	2.11458	2.46004	7.15092e-44	2.54253e-42		Tmem116	2.2051	2.77814	1.81373e-34	5.47721e-33		Casq2	2.16818	1.06423	3.10832e-05	0.000161499		A630023A22Rik	-2.79297	4.70799	2.30773e-75	7.61772e-74
Shank2	2.11228	3.35399	4.89092e-62	2.47789e-60		Hist1h3d	-2.20462	0.575602	4.1225e-06	2.51959e-05		Pou6f2	2.16008	2.37914	2.58327e-07	1.83981e-06		Rab6b	-2.78497	2.70356	6.80914e-42	1.10278e-40
Avil	-2.1119	4.17672	5.22848e-47	1.99215e-45		1700012D14Rik	2.20146	1.72617	0.000283813	0.00125493		Cntnap5b	-2.15637	1.52176	0.000348479	0.00145658		Cdh20	2.78286	0.0961639	2.23035e-09	1.05391e-08
Agbl1	2.10582	0.917045	2.26743e-09	1.90876e-08		6530402F18Rik	-2.19171	0.0534447	0.00391841	0.0129407		Zfp273	-2.14528	1.56037	0.0189509	0.048656		Sntg1	-2.78187	1.33342	1.02068e-19	8.55577e-19
Tmem132b	-2.09844	0.598046	5.16334e-05	0.000241101		Cilp	-2.19171	0.346937	0.00391841	0.0129407		Gpr137b-ps	-2.14528	2.50484	0.0189509	0.048656		Wdr27	2.77766	2.56749	1.52307e-64	3.87235e-63
4931408D14Rik	-2.09844	1.06958	5.16334e-05	0.000241101		0610031O16Rik	2.19125	2.29085	1.85538e-12	2.18957e-11		Stmn2	-2.14424	0.246115	3.14686e-05	0.000163318		Tspan11	2.77469	5.30014	2.90609e-76	9.80346e-75
Chn1os3	-2.09842	1.63853	1.58704e-10	1.48113e-09		Tnnt3	2.18543	1.68835	1.37003e-15	2.01369e-14		Csrnp3	-2.14392	2.24613	3.66981e-13	4.46805e-12		Ankdd1b	2.77058	2.12962	5.87902e-51	1.14848e-49
Olfr920	-2.09283	0.255539	0.000579335	0.00220556		Pirb	2.17821	0.264946	9.6972e-05	0.000472926		Srsf12	-2.13732	0.963909	2.92353e-06	1.79155e-05		Cd80	-2.77016	3.76849	8.78935e-61	2.03287e-59
Pld4	-2.09283	0.147845	0.000579335	0.00220556		Adcyap1r1	2.17761	5.16151	4.09516e-39	1.39852e-37		C230037L18Rik	2.13669	0.719256	1.26063e-06	8.09838e-06		Zfp558	2.76995	3.89394	1.88139e-87	8.23467e-86
Rrs1	-2.08688	0.320018	1.86187e-06	1.09348e-05		Car2	2.17102	2.79275	4.77618e-20	8.80791e-19		Ccdc178	2.13669	1.09639	1.26063e-06	8.09838e-06		C1s1	-2.76008	1.95821	3.24408e-18	2.54214e-17
Pisd-ps1	2.08649	3.83658	8.95688e-37	2.71078e-35		Tm4sf1	-2.17099	5.97046	4.8788e-110	1.03813e-107		Mycbpap	2.13112	0.649239	0.000156575	0.000708636		Lhfpl3	-2.75951	1.90494	1.33133e-23	1.29674e-22
Ethe1	2.08643	3.24356	1.35793e-25	2.88946e-24		Synpr	-2.1699	3.62894	7.95573e-11	8.29832e-10		Slc7a15	-2.12964	0.39041	0.00153283	0.00550717		Drc1	2.75637	1.14776	1.31975e-23	1.28636e-22
4930563E22Rik	2.08363	0.663515	0.00754405	0.0216387		Gpc5	2.1589	3.2613	2.0416e-46	8.13758e-45		D130043K22Rik	-2.12964	0.677617	0.00153283	0.00550717		Gm6093	-2.75443	0.691784	0.00876244	0.0174857
A230108P19Rik	-2.08317	1.65985	9.75313e-14	1.14707e-12		Majin	2.15796	0.0534513	0.00145888	0.00541394		9130019O22Rik	-2.12742	1.96676	2.56658e-09	2.28432e-08		Slfn5	2.74662	0.355772	0.00994698	0.019623
Slc1a1	-2.08019	0.892999	0.00691075	0.0200551		Gm6904	2.15796	0.137684	0.00145888	0.00541394		Slc38a4	2.12064	5.945	4.88994e-49	2.2395e-47		Aldh1a7	2.74442	0.649048	2.79367e-20	2.39401e-19
Mgst2	2.07737	1.08011	0.00244346	0.00798569		Nostrin	-2.15597	1.67049	1.35798e-09	1.2631e-08		Abcg1	-2.1076	1.65299	3.98585e-11	4.13256e-10		Cntn6	-2.74353	1.49787	4.81459e-20	4.09536e-19
Htr5b	2.07737	0.147888	0.00244346	0.00798569		Ptgir	-2.15413	0.874808	0.0185072	0.0490369		Fam110c	-2.10016	0.71922	5.20884e-05	0.000258963		Unc13b	2.74234	5.5391	2.29889e-138	3.92542e-136
Otud7a	-2.06483	4.63495	2.68068e-94	3.34023e-92		Slc7a15	-2.15413	0.39041	0.0185072	0.0490369		Pnp2	2.09079	0.381861	0.00751431	0.0220753		Hist1h2bm	-2.7383	0.117131	0.000682186	0.00166908
Slc25a21	2.05916	2.94812	6.90147e-19	1.11252e-17		Olfr1317	-2.15228	0.6274	2.93168e-05	0.00015692		Sema7a	-2.09076	5.85265	5.53165e-90	7.57507e-88		Serpinb9b	-2.73617	2.11736	1.11621e-15	7.80503e-15
Elfn1	-2.0583	4.31393	5.13105e-63	2.72952e-61		Ankrd33b	2.13781	1.53342	3.9842e-06	2.44262e-05		Atg101	-2.08523	2.77118	0.00693897	0.0206423		Esrrg	-2.73176	4.65992	1.85368e-96	1.0338e-94
Fgf10	2.05749	3.27668	3.79739e-62	1.93094e-60		Slc14a1	2.13145	2.0966	3.77943e-15	5.39456e-14		Gbp3	2.08332	1.2078	4.53471e-10	4.26084e-09		Rgs5	-2.72618	2.55545	1.5832e-67	4.36199e-66
Adrbk2	2.04952	2.21984	3.19842e-18	4.98731e-17		D430019H16Rik	2.13036	3.12291	1.70154e-30	4.59649e-29		Eps8l3	-2.0754	1.13765	7.39827e-07	4.91005e-06		Grm7	-2.72461	4.20505	6.77398e-64	1.6973e-62
Spink10	-2.04828	3.95631	6.28074e-43	2.19366e-41		Adgrb1	2.12947	0.590717	1.38517e-06	9.04972e-06		Diras2	2.07267	0.106702	8.99882e-05	0.000428886		Ptchd4	-2.72452	5.95131	4.27785e-123	4.77152e-121
Neurl2	-2.04793	1.59426	4.44362e-08	3.29366e-07		Acaa1b	2.12655	0.490053	4.37146e-09	3.86185e-08		Miat	-2.07198	0.0643004	0.000223126	0.00097722		Rbm46	2.72402	1.65633	7.62302e-23	7.2613e-22
Sft2d2	-2.04784	4.1846	1.2072e-50	4.96927e-49		Hpse	2.12421	0.818354	0.000165984	0.00077245		Scarna2	-2.06495	3.45859	2.90887e-07	2.05164e-06		Hist1h3c	-2.72381	0.390413	3.3193e-09	1.54317e-08
Nudt8	-2.03542	1.59071	6.91833e-09	5.55676e-08		Unc13b	2.12298	5.5391	8.08461e-71	5.97959e-69		Trpm6	-2.06495	1.41609	2.90887e-07	2.05164e-06		Penk	2.70749	1.71596	1.03242e-11	5.7347e-11
Bhlhe22	2.0324	0.329106	2.07521e-06	1.21004e-05		Fam84a	2.11418	0.684583	5.66775e-05	0.000289051		Serpinb9b	2.06047	2.11736	2.94983e-20	5.44715e-19		Il18rap	-2.69596	2.18063	4.12857e-19	3.36489e-18
Grin2b	-2.0261	2.42856	4.2119e-19	6.86158e-18		Gm765	-2.11071	0.329187	4.41032e-06	2.68719e-05		A330074K22Rik	-2.05652	2.52572	1.68803e-10	1.657e-09		Lin28b	-2.69465	0.739421	4.44678e-18	3.46889e-17
Gm13483	-2.02154	5.87512	5.33795e-78	4.07896e-76		Gm16223	2.10655	0.178134	1.94691e-05	0.000107154		Evpl	-2.05469	0.620242	8.58303e-05	0.000411195		1110019D14Rik	-2.69363	3.07235	4.22334e-35	5.68774e-34
Fgf2	-2.02087	5.84158	2.3632e-119	4.95235e-117		Ankrd6	-2.10129	3.67307	2.72019e-25	6.12751e-24		Mst1r	-2.0526	0.670483	0.00257896	0.00874256		Sgpp2	2.68334	3.45401	6.22845e-78	2.192e-76
Cd55b	2.01849	2.21505	7.98024e-13	8.91556e-12		Apcdd1	2.10122	3.92922	1.53346e-55	7.46807e-54		Mpp7	-2.04993	7.08735	2.89948e-134	1.25321e-131		Akr1c14	2.68193	0.415901	3.04267e-15	2.06898e-14
Dkk2	2.01746	6.33262	2.46757e-131	7.26148e-129		Gjb2	-2.09555	2.70705	4.35474e-26	1.01569e-24		Slc45a2	2.04115	0.75983	2.94013e-08	2.34651e-07		Cd79a	-2.68008	0.47393	8.41974e-06	2.74654e-05
Esrrg	-2.00935	4.65992	1.79205e-67	1.09672e-65		Sarm1	-2.09371	0.663571	0.00672253	0.020584		Slc44a5	2.04115	1.85303	2.94013e-08	2.34651e-07		Csmd1	-2.672	6.47899	7.7721e-86	3.27731e-84
Sp100	-2.00912	1.06954	7.53718e-07	4.66429e-06		Plac8l1	2.0855	0.552824	9.87731e-08	7.46519e-07		Gstm2	-2.03908	1.85927	2.72002e-10	2.61254e-09		Clu	2.66995	3.15398	2.06853e-64	5.24952e-63
Lrp2	-2.00034	4.7024	1.1522e-23	2.28311e-22		Lipg	-2.08332	1.63089	6.68071e-07	4.59249e-06		Rcsd1	-2.03759	2.01766	4.7214e-07	3.25208e-06		Grin1	-2.66866	0.168107	9.94563e-05	0.000278198
Echdc3	-1.99184	1.82463	6.68312e-15	8.58257e-14		Slc2a3	-2.08332	2.73381	6.68071e-07	4.59249e-06		AA415398	-2.03036	1.66358	2.78692e-09	2.46457e-08		Ramp3	-2.66866	1.13262	9.94563e-05	0.000278198
1700024P16Rik	1.99171	2.4553	2.17362e-17	3.27844e-16		Lrfn2	2.07903	1.07514	4.27355e-09	3.78167e-08		Etnk2	2.02678	0.77302	5.13338e-05	0.000255579		BB218582	-2.66646	0.489977	9.89563e-09	4.42075e-08
Gsta3	1.98835	1.66003	6.94323e-10	6.11278e-09		Asb5	2.07732	3.06223	4.55944e-46	1.79663e-44		Lpar3	2.02678	0.560451	5.13338e-05	0.000255579		6030443J06Rik	-2.66551	2.65669	1.399e-16	1.01947e-15
4930481A15Rik	-1.98792	1.29273	8.0217e-06	4.29532e-05		Slc37a1	2.07151	0.255553	0.000839769	0.00329967		Mannr	-2.02383	1.86868	1.06878e-13	1.35493e-12		Cadps	2.66511	1.11188	5.44677e-15	3.64992e-14
Bdh2	1.98755	3.69425	1.11752e-57	5.34825e-56		Spink10	-2.0703	3.95631	5.16086e-52	2.25886e-50		Cpsf4l	-2.02237	3.14798	1.14774e-21	2.2581e-20		Azin2	-2.66356	6.35372	1.81658e-125	2.18479e-123
A630020A06	1.98669	0.88692	2.94241e-05	0.00014416		Bank1	2.0681	0.449415	0.000282513	0.00125038		Ankrd35	-2.01801	0.283578	0.000368166	0.001531		Gm5893	2.66346	0.529491	4.24113e-13	2.56938e-12
Cyp2c55	1.98602	1.79264	4.88664e-16	6.69193e-15		Fgf10	2.0681	3.27668	0.000282513	0.00125038		Fbxo44	-2.01761	1.77274	1.73484e-10	1.69934e-09		Luzp2	2.65165	4.09126	6.19302e-45	1.07608e-43
Cfap70	1.9761	1.2366	1.62504e-08	1.25775e-07		Gldc	2.06519	2.765	8.86462e-27	2.10303e-25		Prkar1b	-2.01712	4.03689	3.5084e-31	1.00465e-29		Fggy	2.64982	6.70595	4.13173e-160	1.05826e-157
E030030I06Rik	-1.97522	3.40861	0.0117365	0.031575		Eva1c	-2.06312	2.38657	2.94317e-29	7.60877e-28		Hpn	2.01583	2.03454	2.44964e-15	3.47141e-14		Nrcam	2.64276	4.61604	2.523e-112	2.15405e-110
E230016K23Rik	-1.97522	0.568092	0.0117365	0.031575		Cdk2ap2	2.06112	0.805581	3.9011e-06	2.39485e-05		Nek10	-2.0118	3.80386	2.94612e-22	5.99233e-21		Apbb1ip	-2.63983	5.93892	4.77914e-119	4.75542e-117
Rims2	1.97223	5.37039	1.67098e-80	1.38391e-78		E230016K23Rik	2.06112	0.568092	3.9011e-06	2.39485e-05		Slc2a3	-2.00355	2.73381	7.01776e-10	6.50118e-09		Dnajc6	2.63917	1.84987	1.18974e-23	1.16539e-22
Lysmd1	-1.96771	0.301928	0.00428822	0.0131334		Ston2	2.05978	4.32231	1.9279e-69	1.36045e-67		Irgm1	-2.00234	3.12816	1.11102e-17	1.76831e-16		Rnasel	-2.6369	0.489954	1.70315e-08	7.44509e-08
Cyyr1	1.9667	0.568102	0.000256908	0.00105345		Gbp3	2.05753	1.2078	2.01751e-08	1.658e-07		Pde1b	1.99677	0.916881	0.00419111	0.0133013		Rrs1	-2.6369	0.320018	1.70315e-08	7.44509e-08
Tmem117	1.96589	5.17763	5.82412e-92	6.94425e-90		Pigw	-2.04941	1.77951	1.56042e-08	1.29935e-07		Htr2a	-1.99534	5.83511	4.92895e-83	5.92803e-81		Adtrp	-2.6369	0.168021	1.70315e-08	7.44509e-08
Luzp2	1.96389	4.09126	5.23783e-65	2.9449e-63		Ccdc67	-2.03049	1.06954	4.5784e-06	2.77736e-05		Uchl1	-1.99109	2.75073	6.90892e-12	7.58391e-11		Gsta3	2.63381	1.66003	1.97378e-15	1.3548e-14
Atp6v1g2	-1.96305	0.320088	0.00159428	0.00545803		Piwil2	-2.03049	0.99248	4.5784e-06	2.77736e-05		Spink10	-1.99081	3.95631	7.8973e-43	3.15687e-41		Proz	-2.63001	1.41201	1.46845e-05	4.61174e-05
Tmem30c	-1.95988	0.0534331	0.000600026	0.00227431		Cfap77	-2.02609	0.301974	0.000348359	0.00150708		D5Ertd615e	-1.98879	1.62021	8.11139e-06	4.61682e-05		Kcnip4	-2.62888	9.26284	3.0813e-141	5.60757e-139
Ncam2	-1.95879	4.65466	9.12283e-51	3.77778e-49		Ttc6	2.023	0.255551	1.88752e-05	0.000104134		Abca6	-1.98143	1.84361	1.76235e-10	1.72262e-09		Col15a1	2.62678	3.80957	2.41779e-31	2.95934e-30
Pde6a	1.95174	0.236522	0.000768992	0.00284003		Zfp947	-2.02194	2.11949	5.75373e-11	6.07016e-10		Cd274	1.9813	0.786118	8.58877e-05	0.000411327		Airn	2.62662	10.0431	1.40389e-245	1.94171e-242
Pcdh10	1.94615	1.55669	9.26358e-12	9.59735e-11		Catsper3	2.02119	1.39058	1.04989e-10	1.08505e-09		Mgst2	-1.98012	1.08011	0.0117805	0.0325059		Grid2	-2.62131	7.13473	1.86068e-167	5.47554e-165
A630023A22Rik	-1.94093	4.70799	1.31206e-47	5.08322e-46		Noxred1	-2.01759	1.91385	6.88027e-07	4.71561e-06		2610318N02Rik	-1.98012	0.818214	0.0117805	0.0325059		Shisa2	2.613	0.465794	4.0041e-07	1.52396e-06
Aox3	1.93777	1.26977	4.99995e-17	7.28707e-16		Fam89a	-2.0132	1.82159	3.53029e-12	4.05881e-11		Vmn2r57	-1.98012	0.197838	0.0117805	0.0325059		Mctp2	2.60168	4.19462	7.56015e-105	5.28103e-103
Plac8	-1.9366	2.69307	4.30012e-17	6.307e-16		Unc5d	2.00977	5.57827	9.10492e-114	2.33204e-111		Lbp	1.97591	1.34721	1.94019e-06	1.21589e-05		Isg15	-2.59061	0.552858	0.0163152	0.0306458
4933406C10Rik	-1.92731	2.01746	7.3201e-08	5.22416e-07		Myrip	2.00973	0.301908	0.000477972	0.00199448		Map3k19	1.97591	1.04259	1.94019e-06	1.21589e-05		Gnat3	-2.59061	0.355778	0.0163152	0.0306458
Kcnj15	1.92437	3.19367	8.63804e-09	6.87811e-08		Myo3b	2.00973	0.178071	0.000477972	0.00199448		Slc45a1	-1.97582	1.47788	1.88991e-07	1.36356e-06		Cd200	2.58591	1.60879	1.77551e-38	2.61245e-37
Slc5a7	1.92372	3.39077	5.11636e-47	1.95482e-45		Tnfsf18	-2.0079	0.670493	5.042e-05	0.000259821		Cd40	1.97317	2.14499	4.58728e-08	3.57446e-07		Shcbp1l	-2.58514	2.09324	2.04742e-30	2.44753e-29
0610040J01Rik	1.91453	3.41053	3.92291e-19	6.39832e-18		Tacr1	-2.00448	1.81512	4.07115e-08	3.24168e-07		Zfp418	-1.97121	1.0961	0.00430869	0.0136183		Casp4	2.57782	4.36504	2.75776e-106	1.9763e-104
Stk33	-1.91177	0.465726	0.000140976	0.000607006		Fam155a	2.00425	4.42975	2.23534e-47	9.12004e-46		Tm4sf1	-1.96569	5.97046	2.4331e-109	6.47157e-107		4933405D12Rik	2.57341	3.32186	4.63953e-71	1.39196e-69
Trank1	-1.91177	1.92259	0.000140976	0.000607006		A330033J07Rik	2.00225	2.21505	1.98156e-13	2.49381e-12		Tuba8	-1.96193	0.399019	0.000604108	0.00239548		Bcl2l14	2.5727	0.178075	7.22237e-07	2.66309e-06
Gm4532	-1.90739	0.106691	0.000369999	0.0014638		Lacc1	-1.99631	2.29026	8.38438e-16	1.24962e-14		Cyp4f16	-1.96051	4.14407	3.44178e-28	8.96483e-27		Cuzd1	2.57183	0.752918	5.15291e-17	3.83584e-16
Klhl1	-1.90158	0.407501	0.000979041	0.00352175		Fbxl15	1.9902	0.811891	0.00434636	0.0141512		Unc5d	1.95706	5.57827	9.47727e-103	1.95642e-100		Kcnj15	2.57012	3.19367	9.32738e-71	2.76839e-69
Apitd1	1.90094	0.905057	3.93706e-11	3.87019e-10		4930593A02Rik	-1.98924	1.40757	1.48011e-10	1.50747e-09		44256	1.95704	2.99879	2.8251e-14	3.7178e-13		Fam213b	2.56382	0.432764	3.42106e-10	1.71873e-09
Dsc2	1.89947	0.320113	0.00719446	0.0207651		Mttp	-1.98472	2.2222	5.29646e-16	7.97988e-15		Cd200	1.95584	1.60879	0.000764011	0.00295004		Tmem196	-2.56002	2.78328	1.01308e-66	2.73136e-65
Slc44a5	1.89479	1.85303	4.01215e-08	2.99148e-07		Hist1h2ak	-1.97947	0.127467	0.00415197	0.0135887		D330050G23Rik	-1.95315	1.12753	5.08412e-06	3.0025e-05		Pth2r	2.55906	2.94745	4.39968e-65	1.13742e-63
AI115009	-1.89123	1.74613	2.67126e-11	2.67339e-10		1500009L16Rik	1.97118	2.76515	2.13179e-27	5.20015e-26		Nyap2	1.94941	1.31555	7.51847e-08	5.69173e-07		Chrna7	2.55835	4.76863	1.66833e-114	1.50815e-112
Cntn1	1.89097	1.55278	2.99082e-06	1.70652e-05		Pls1	1.9711	0.670607	0.0135193	0.0376608		Pyroxd2	1.94703	3.82909	1.75283e-53	8.88036e-52		T2	-2.55297	0.928774	6.17717e-14	3.92451e-13
Ppfia4	-1.88165	2.16028	3.33717e-05	0.000162408		Apol7d	-1.96512	0.505998	8.21242e-05	0.000406244		AI607873	1.94676	1.17295	5.20382e-09	4.4566e-08		Osr2	2.55257	2.51826	6.71192e-06	2.21083e-05
Sult2b1	-1.88155	0.373147	0.00711175	0.0205521		Adh7	1.96405	2.08063	1.3045e-09	1.21499e-08		Zmynd10	1.93434	0.0749675	0.000142928	0.000652792		Pde6c	-2.55216	0.856195	5.66737e-07	2.11681e-06
Srrm4	-1.88155	0.90495	0.00711175	0.0205521		Gm16432	1.96026	2.56098	4.07786e-19	7.20318e-18		Rimkla	1.9338	0.390522	9.30689e-06	5.26047e-05		Gstk1	2.55133	0.0749255	3.07051e-09	1.43135e-08
Srrm4os	-1.88155	0.785967	0.00711175	0.0205521		3830408C21Rik	-1.95869	2.27891	2.69895e-07	1.95032e-06		Adra1a	1.93349	0.986944	6.24688e-07	4.20645e-06		Trim12a	-2.54918	2.06624	5.66e-48	1.0355e-46
Mx1	1.87483	0.47395	1.68388e-06	9.94439e-06		1700007F19Rik	-1.9576	0.952424	4.09741e-08	3.26071e-07		Ccdc78	1.9328	2.09108	5.32124e-15	7.38937e-14		Dpysl4	-2.54126	3.1339	4.41165e-34	5.78914e-33
Crmp1	-1.87278	3.51263	2.57294e-14	3.16323e-13		Myocd	1.95428	2.36405	1.0509e-08	8.93364e-08		Slc6a17	-1.92772	5.19722	7.76395e-57	4.3475e-55		Fam65b	-2.54031	3.33482	4.24883e-39	6.37371e-38
Gm5441	1.87251	0.407612	6.49517e-08	4.67889e-07		Id4	1.95123	1.78942	1.91453e-11	2.09493e-10		1700049G17Rik	-1.91643	4.3916	1.0763e-37	3.80725e-36		Acvr1c	-2.5332	0.137746	0.000306206	0.000793542
Kcnmb3	1.87251	1.13257	6.49517e-08	4.67889e-07		1810021B22Rik	-1.92879	0.449422	7.46201e-06	4.40111e-05		1110019D14Rik	-1.9151	3.07235	1.83962e-20	3.41987e-19		Cgn	2.53139	2.18238	3.45445e-57	7.55989e-56
Cxcl5	1.86253	3.33218	1.45917e-54	6.63873e-53		A230077H06Rik	1.92869	0.0855577	0.00241798	0.00849888		Pisd-ps2	-1.91284	4.24378	6.79092e-38	2.42701e-36		Gm19689	2.52079	2.22199	2.05237e-37	2.9174e-36
Tacr1	-1.86245	1.81512	6.60004e-11	6.34365e-10		Cd101	1.92721	1.13781	0.00015242	0.000713649		Rims2	1.91153	5.37039	2.86011e-79	3.04294e-77		Kif26a	2.51865	1.56803	2.40351e-11	1.29099e-10
Ccin	-1.862	0.862258	0.0197552	0.0492581		Exoc3l	1.92653	0.590618	1.01471e-05	5.85257e-05		Unc13b	1.91127	5.5391	1.64864e-71	1.42514e-69		Plau	-2.50072	4.831	3.16262e-95	1.7358e-93
Cox6b2	-1.862	0.513953	0.0197552	0.0492581		Nyap2	1.92613	1.31555	6.963e-07	4.76759e-06		Trim14	1.91029	1.0962	6.96318e-08	5.29745e-07		Plaur	-2.49635	5.33439	6.97778e-107	5.05286e-105
Ccdc60	-1.85539	0.432826	0.000597341	0.002266		Acot12	1.92613	1.19297	6.963e-07	4.76759e-06		Wnt16	-1.90754	3.64423	3.34511e-28	8.72947e-27		Gm10684	2.49147	1.50582	1.57519e-22	1.48308e-21
Sema7a	-1.85502	5.85265	5.65165e-90	6.2038e-88		Ret	1.9251	4.72193	4.74683e-88	5.56385e-86		Egflam	1.90742	3.24319	2.54241e-38	9.22942e-37		Sh2d4b	-2.49145	2.76965	4.29223e-29	4.95128e-28
Cftr	1.8513	1.98153	2.07262e-08	1.58905e-07		Xdh	-1.92419	1.39055	5.0701e-05	0.000261074		B230217O12Rik	-1.90703	1.6915	4.64863e-08	3.61819e-07		Rassf6	-2.48945	3.24763	1.13788e-18	9.11295e-18
Rbm46	1.8513	1.65633	2.07262e-08	1.58905e-07		Slit1	-1.92419	1.30189	5.0701e-05	0.000261074		Tnfrsf22	-1.90359	0.952244	0.000985378	0.00371154		Peli3	2.48756	1.94069	7.1285e-18	5.50806e-17
Npy1r	1.8513	0.886881	2.07262e-08	1.58905e-07		Gda	-1.91854	1.76643	6.21818e-09	5.41584e-08		Krt19	-1.90359	0.792519	0.000985378	0.00371154		P2rx3	-2.48559	1.72958	2.07743e-11	1.12238e-10
Fbxo27	1.84987	1.16309	1.04825e-07	7.34835e-07		Zfp160	1.91571	6.5258	1.5167e-132	5.66959e-130		Cyp2c55	-1.89951	1.79264	7.70085e-07	5.09863e-06		Klhl1	-2.48117	0.407501	3.75635e-08	1.59564e-07
4930455H04Rik	1.8481	0.837438	5.33086e-07	3.36826e-06		Eppk1	-1.91267	1.59425	1.04338e-07	7.85146e-07		Scel	-1.89608	3.2681	0.00263313	0.00888698		Hykk	-2.47771	3.73762	2.04377e-40	3.17969e-39
Tex15	-1.84688	1.00359	7.08096e-08	5.06657e-07		Tmem45b	-1.91165	0.337936	0.000937143	0.00364379		4930412C18Rik	-1.89241	0.649149	5.06222e-06	2.99212e-05		Cyp4f41-ps	2.47282	1.0588	1.34391e-14	8.80931e-14
4933413L06Rik	-1.846	2.0344	1.9074e-06	1.11738e-05		Ccdc169	-1.91027	2.77762	1.96767e-21	3.83848e-20		Pirb	1.89233	0.264946	0.00127891	0.00469193		Tmem150c	2.46939	1.60544	5.05838e-19	4.10096e-18
Aldh1l1	-1.84442	0.856156	5.32152e-05	0.000247651		Sphkap	1.90934	0.44116	0.000449894	0.0018882		Trim30a	-1.8879	1.7362	1.30387e-05	7.22797e-05		Gfra4	2.46439	1.00383	1.71623e-08	7.49754e-08
Tnfsf11	-1.84333	3.10467	1.61547e-24	3.28581e-23		Dupd1	-1.90422	0.255571	0.00252391	0.00881522		B4galnt4	1.88579	0.432876	0.000236501	0.00102831		Hist1h2bk	-2.46038	0.127459	0.00053384	0.00132965
Tdrp	-1.84109	2.04237	1.80249e-07	1.22568e-06		Brinp1	-1.8995	7.71682	1.71805e-144	7.9208e-142		Map3k6	-1.88469	2.37285	6.77314e-15	9.31206e-14		Cox6b2	-2.46038	0.513953	0.00053384	0.00132965
Psrc1	-1.83101	4.13544	3.92081e-25	8.1811e-24		Sft2d2	-1.89891	4.1846	5.37783e-49	2.26081e-47		Serpinb2	-1.88302	3.72711	1.69739e-14	2.27267e-13		Zfp474	2.45064	1.71555	1.91548e-32	2.41284e-31
Slc2a2	-1.82715	1.35143	1.17445e-06	7.08406e-06		Gm14023	1.89839	0.301962	0.00740899	0.0224084		Gstt1	-1.88248	1.64896	3.37114e-05	0.000173914		Slco4a1	-2.44844	2.73492	1.38449e-15	9.58885e-15
Dhdh	1.82191	0.399121	0.00213745	0.00707588		Perm1	-1.8964	2.24345	2.52289e-08	2.05259e-07		Ccdc60	-1.87586	0.432826	8.75606e-05	0.000418469		Fbxw26	-2.44844	0.922811	1.38449e-15	9.58885e-15
1600027J07Rik	-1.81941	1.12733	0.000363107	0.00143901		Tmem141	1.89328	1.251	2.25488e-07	1.64663e-06		Wdr17	1.8717	1.81851	9.97822e-11	9.96453e-10		Hpgd	-2.44517	0.329137	0.00387659	0.00830629
Stbd1	-1.81941	2.01721	0.000363107	0.00143901		Kng2	-1.89323	1.56794	6.46187e-08	5.02102e-07		Kcns3	-1.87046	3.93786	3.69885e-36	1.25537e-34		Txk	2.4373	1.62721	5.76707e-32	7.15375e-31
Clca3a1	1.81872	4.75711	1.67781e-72	1.12105e-70		Col13a1	-1.8932	0.178121	0.00690106	0.0210193		Acot12	1.86288	1.19297	9.3439e-07	6.09601e-06		Flt4	2.43484	4.66018	1.33844e-108	1.05182e-106
Kcnip1	-1.81806	2.36892	2.4195e-12	2.60421e-11		Nup210	-1.8932	0.127407	0.00690106	0.0210193		Entpd2	1.86029	0.473988	0.000705148	0.00274884		Galnt12	2.43161	1.54498	1.08624e-19	9.08881e-19
Siah3	1.80155	0.127472	0.012176	0.0325422		1700086O06Rik	-1.89286	3.51214	1.88675e-29	4.91444e-28		Ttll11	-1.859	5.19798	3.06545e-71	2.60112e-69		Aldh1a3	2.42857	5.21675	1.69547e-125	2.05703e-123
Arntl2	-1.80114	3.66415	2.21461e-27	5.04617e-26		Rsph3a	1.88539	1.21217	0.00134143	0.00501441		Slc37a1	1.85841	0.255553	0.00389866	0.0124878		Irx3	2.42479	0.975371	3.59547e-13	2.18781e-12
Hoxb9	-1.79726	3.1385	9.91865e-10	8.64429e-09		Rem1	1.87995	1.9728	2.95128e-17	4.71897e-16		Dusp2	1.85841	0.473776	0.00389866	0.0124878		Car2	2.42472	2.79275	2.07443e-29	2.41714e-28
Kcnd2	-1.79696	8.92891	1.05531e-125	2.51655e-123		Pde1c	-1.87916	3.64905	1.19343e-42	4.38999e-41		Cadm3	1.85841	0.197825	0.00389866	0.0124878		Gm14325	-2.4216	1.4976	1.10906e-27	1.23208e-26
Sdcbp2	1.79455	2.2996	4.78424e-16	6.57761e-15		Slc25a54	1.87722	1.33362	2.56493e-08	2.08312e-07		Mir125a	-1.85696	0.513864	0.000601614	0.00238627		Serpinb2	2.41757	3.72711	1.69912e-92	8.63992e-91
Tbc1d21	-1.78991	0.513793	0.0116949	0.0315		9530062K07Rik	-1.87556	0.892985	0.000214693	0.000972303		AW011738	-1.85201	1.80887	2.83699e-08	2.26811e-07		Abcg2	-2.40913	6.74721	4.83649e-141	8.68746e-139
Nkain2	-1.78954	5.85719	4.04971e-51	1.69732e-49		Rab6b	-1.86801	2.70356	1.24346e-15	1.83351e-14		Alpk1	-1.84412	5.83752	4.48344e-88	5.90576e-86		Pclo	-2.40674	2.90316	2.06617e-47	3.72584e-46
Tnfrsf1b	-1.78923	4.94448	1.71999e-56	8.17499e-55		Gpat2	-1.8663	2.22682	2.62653e-07	1.89898e-06		Slc23a3	1.8414	0.83107	7.30396e-05	0.000354834		Srrm4	-2.40614	0.90495	1.01861e-12	6.02582e-12
2810404M03Rik	-1.78679	1.28364	8.77814e-14	1.03947e-12		Ccdc152	1.85529	3.41872	7.93724e-38	2.61381e-36		Fmod	-1.83764	4.17152	7.51738e-32	2.20282e-30		Gm16701	2.40423	0.552737	1.04283e-08	4.65121e-08
Ank3	-1.77997	7.55702	3.9262e-127	9.87331e-125		Prkcb	-1.85415	1.99509	1.74104e-06	1.12525e-05		Hvcn1	-1.83506	3.18804	4.01421e-19	6.94006e-18		Fam89a	-2.39974	1.82159	6.56439e-12	3.68175e-11
A530046M15Rik	-1.77934	3.22681	8.20569e-17	1.18592e-15		Efcab8	1.85315	3.0668	4.47091e-20	8.26699e-19		Ampd1	-1.83471	1.31549	4.66646e-07	3.22065e-06		Fstl4	-2.39583	2.23906	6.80344e-17	5.03469e-16
9630028B13Rik	-1.77428	2.06661	3.88654e-09	3.19209e-08		5830473C10Rik	1.8516	0.147887	0.00405544	0.0133296		4931408D14Rik	-1.83432	1.06958	0.000139814	0.000640109		Gjb2	-2.39551	2.70705	3.6405e-31	4.44411e-30
Grhl3	1.773	3.11453	9.02818e-14	1.06543e-12		4930447C04Rik	-1.85084	0.958107	0.0015228	0.00562098		Pebp4	-1.83432	0.892993	0.000139814	0.000640109		Vwa5b2	2.37908	0.0855687	3.58243e-09	1.6577e-08
Pnp2	1.77246	0.381861	0.0065303	0.019067		Ndufa4l2	-1.85084	0.168102	0.0015228	0.00562098		Agrp	1.83329	1.60928	1.45286e-10	1.43737e-09		Gng11	-2.37799	1.583	7.1986e-16	5.08238e-15
A930005H10Rik	1.76901	0.843702	2.20601e-06	1.28091e-05		Cyp2c55	-1.849	1.79264	1.61589e-07	1.19707e-06		Tc2n	1.83072	2.13754	7.27454e-10	6.73454e-09		Kcnk10	2.37182	5.42635	1.4563e-101	9.23947e-100
Gm10767	1.76593	0.457497	0.00035175	0.00139841		Gm10635	-1.84523	2.70206	2.90364e-17	4.64818e-16		Kcnh7	-1.82999	1.60528	1.27489e-05	7.07298e-05		Lrrd1	2.36043	1.21239	1.45812e-17	1.11053e-16
Gjb3	1.76194	1.33804	1.23188e-06	7.39824e-06		Gng4	-1.83971	2.7314	3.87925e-08	3.09601e-07		Bank1	1.82479	0.449415	4.06062e-05	0.000206784		Cd5	2.35771	2.30424	2.81603e-27	3.08871e-26
Ccdc171	-1.76163	5.43944	3.10452e-70	1.99715e-68		Cdk15	-1.83971	2.17817	3.87925e-08	3.09601e-07		Rsph4a	-1.82295	0.329049	0.00429258	0.0135767		9330159M07Rik	-2.35361	0.811699	8.03668e-17	5.91882e-16
Sds	1.76096	2.18291	3.93911e-17	5.80211e-16		Lrtm1	-1.83521	1.42461	1.06718e-06	7.1031e-06		Tbc1d21	-1.82295	0.513793	0.00429258	0.0135767		Slc38a4	2.35137	5.945	2.04892e-149	4.29373e-147
Gm4890	-1.75975	1.84377	4.23721e-07	2.7207e-06		Ccdc27	1.83416	0.399065	7.8559e-05	0.000389165		Cilp	-1.82295	0.346937	0.00429258	0.0135767		Cpm	2.34161	3.47163	1.25811e-67	3.49417e-66
Ankrd1	-1.74903	5.19006	3.69685e-09	3.04534e-08		Tnr	1.83416	0.311092	7.8559e-05	0.000389165		Enpp5	-1.82212	3.49718	1.65779e-27	4.1841e-26		Grin2d	2.34119	3.59989	1.30583e-64	3.33844e-63
BC022687	1.74893	3.37697	1.65303e-37	5.10335e-36		Nudt7	-1.83117	3.01916	2.86613e-16	4.38026e-15		AW046200	-1.82204	2.38619	1.00799e-11	1.09517e-10		Gm11351	-2.34082	1.46582	7.62092e-10	3.73115e-09
Pde1b	1.74463	0.916881	0.000106787	0.000471121		Cthrc1	-1.82906	5.4846	1.09431e-82	1.12951e-80		4933408B17Rik	-1.81804	2.09081	2.65778e-09	2.36245e-08		Nrxn3	-2.33893	2.22469	3.26088e-15	2.21301e-14
Vstm2b	-1.74347	2.09593	0.00690975	0.0200551		Glra1	-1.82861	1.18782	0.000344405	0.00149091		Nudt7	-1.80896	3.01916	3.73549e-17	5.79211e-16		Cyp4v3	-2.33289	2.55689	1.95148e-10	9.97816e-10
She	-1.74347	0.274364	0.00690975	0.0200551		Nxph1	-1.8286	0.612989	0.000344405	0.00149091		6030407O03Rik	-1.80768	3.05968	9.34367e-20	1.67399e-18		4933400C23Rik	-2.33255	0.227065	0.00684576	0.0139817
Acan	1.74083	4.08647	8.05407e-51	3.34522e-49		Hr	-1.8286	0.560422	0.000344405	0.00149091		Mmp12	1.80694	0.759494	0.0121272	0.0332867		Fam71e1	-2.32582	1.88999	5.15365e-13	3.09913e-12
Hs3st3a1	-1.73868	4.01368	2.46293e-23	4.82505e-22		Clvs1	1.82842	2.47795	0.000412628	0.00175063		Scn8a	1.80694	0.905153	0.0121272	0.0332867		Vstm5	-2.3189	1.40332	1.26496e-09	6.09816e-09
Gm19299	1.73651	0.799055	5.89994e-05	0.00027237		Tgm2	1.82176	4.88027	1.45626e-43	5.44365e-42		Pax6	1.80694	0.127425	0.0121272	0.0332867		A530046M15Rik	-2.31199	3.22681	7.31094e-42	1.18266e-40
Slc39a12	1.73105	0.773041	1.09242e-06	6.64434e-06		Gjc3	1.81895	0.338033	0.00222306	0.00790211		Depdc7	1.80552	1.41181	2.66169e-07	1.8908e-06		Tgfa	2.30816	3.77645	4.3483e-62	1.03871e-60
Actn2	1.72495	2.17763	1.18817e-08	9.31605e-08		Atp8b5	1.81115	1.66347	4.79977e-06	2.90655e-05		Plppr1	1.80401	3.77824	8.89116e-53	4.42351e-51		0610040J01Rik	-2.30757	3.41053	6.28387e-18	4.8663e-17
Grik3	1.72359	0.656518	1.80938e-05	9.15345e-05		Grin2d	1.81051	3.59989	9.60199e-32	2.66677e-30		Mreg	-1.80298	0.381837	0.000965162	0.0036493		Aldh8a1	2.30672	0.106669	2.84969e-07	1.10342e-06
Slfn10-ps	-1.72073	0.670527	7.00719e-06	3.78728e-05		Rgs7	1.80989	4.39882	1.5643e-28	3.94095e-27		Adgrf2	-1.80298	0.355706	0.000965162	0.0036493		Gstm4	2.30484	0.998103	4.60022e-14	2.94155e-13
Mx2	1.72011	3.83754	1.08933e-55	5.12468e-54		Apol8	-1.80336	1.44918	3.99358e-07	2.82388e-06		Tnnt3	1.80288	1.68835	3.28887e-09	2.88266e-08		S100a4	-2.30269	1.31579	0.00159865	0.00367841
4833420G17Rik	-1.71662	5.92362	4.37712e-88	4.51791e-86		Krt20	-1.80143	0.465772	0.0113736	0.032542		Dcc	-1.80017	6.26888	4.82963e-96	8.24674e-94		Cass4	-2.3022	2.04535	2.12297e-11	1.14654e-10
Apobec1	-1.71003	3.43274	2.04185e-22	3.86861e-21		Cers3	-1.80143	0.255488	0.0113736	0.032542		Lgals9	-1.79932	2.81348	2.3675e-13	2.91584e-12		Mrfap1	-2.29953	2.45098	1.4767e-35	2.01026e-34
Ucp2	1.70948	1.05878	3.33505e-08	2.5069e-07		Rasgrp1	-1.80143	0.158052	0.0113736	0.032542		Rtn1	1.79915	2.14025	8.11953e-16	1.18088e-14		Slc37a1	2.29351	0.255553	1.47231e-06	5.25103e-06
Ppp2r2b	1.70428	5.09717	6.58096e-78	4.97384e-76		Hist1h2bl	-1.80143	0.158063	0.0113736	0.032542		Siglecg	1.79611	2.91495	3.49279e-14	4.57903e-13		Kcnk12	2.29223	1.92575	1.0297e-24	1.04565e-23
Slfn9	-1.70374	1.43694	1.79217e-05	9.06968e-05		Mr1	1.80021	1.71257	2.46514e-13	3.08276e-12		Fam229b	-1.79355	2.59833	2.48826e-10	2.40161e-09		Gabrg3	-2.29185	1.19782	5.3461e-10	2.64645e-09
Baalc	-1.70107	0.441118	0.000547361	0.00209943		Tmco1	1.7983	3.64876	1.87056e-27	4.57906e-26		Ccdc158	-1.79321	0.521681	0.0117431	0.0324449		Akr1b10	-2.28772	2.71622	1.36681e-10	7.08293e-10
4930447C04Rik	-1.69965	0.958107	2.58481e-06	1.48651e-05		A630023A22Rik	-1.79715	4.70799	2.52239e-63	1.48456e-61		Acot6	-1.79155	0.753093	0.000222126	0.00097331		Adgrg7	2.28671	2.31738	1.34869e-43	2.28041e-42
Ngef	-1.69596	1.60557	7.61823e-05	0.000344451		Stac	-1.79511	4.16982	1.13418e-37	3.70848e-36		Proz	1.79128	1.41201	1.04313e-09	9.55465e-09		5830432E09Rik	-2.28647	0.0962225	0.000381993	0.000976769
Casq2	1.69501	1.06423	5.19406e-05	0.00024229		Hist1h2bb	1.79487	0.684641	0.00122134	0.00462423		Inpp5d	1.78351	1.81144	0.000635748	0.00250442		Tnfrsf11b	-2.28571	6.27444	8.37022e-126	1.0245e-123
Unc13b	1.69353	5.5391	3.89391e-76	2.81972e-74		Neurl1a	-1.79015	4.57742	4.71348e-31	1.28584e-29		Plscr4	1.78131	2.69172	2.08613e-23	4.50128e-22		Ptch2	2.28428	1.66695	2.53626e-20	2.17747e-19
Fmo5	1.69299	1.31563	3.27375e-10	2.9575e-09		Sntg1	-1.78735	1.33342	0.00245767	0.00861213		Ly96	-1.78015	4.13109	1.33784e-26	3.29247e-25		Thbs4	2.27893	3.74355	1.51996e-35	2.06712e-34
4930405A10Rik	-1.69206	0.217294	0.0190527	0.047693		Trat1	-1.78735	0.246108	0.00245767	0.00861213		Kcnh5	1.77983	1.19799	2.39729e-12	2.74705e-11		Fam78b	2.27654	5.2845	2.86018e-114	2.53585e-112
Ptgis	-1.69206	3.4501	0.0190527	0.047693		Ccdc78	1.78483	2.09108	2.21808e-13	2.7864e-12		Trat1	-1.7793	0.246108	0.00257104	0.00872212		2610035D17Rik	-2.27622	5.01563	1.71923e-87	7.54878e-86
6330418K02Rik	1.69134	1.2124	2.87143e-05	0.000141033		Lsmem1	-1.78411	3.49872	1.98545e-25	4.49439e-24		Hist1h2bl	-1.7793	0.158063	0.00257104	0.00872212		Terc	-2.27403	0.868521	3.46262e-09	1.60387e-08
Ddc	1.68753	2.9964	1.73808e-19	2.89283e-18		Noct	-1.78333	9.20471	5.73334e-175	3.96489e-172		2900057B20Rik	1.77698	0.12742	0.00649938	0.0195038		5031434C07Rik	2.27082	3.74326	8.83374e-73	2.73332e-71
Alpk2	1.68625	2.07172	0.01078	0.0293963		Serpinb2	-1.78283	3.72711	1.88879e-11	2.0684e-10		Apcdd1	1.77621	3.92922	5.05281e-48	2.23276e-46		Orm3	-2.26929	0.274281	2.27792e-05	6.98579e-05
Phldb3	1.68534	0.684663	8.81676e-06	4.6956e-05		Trpc6	1.78143	3.20717	3.94303e-45	1.51911e-43		Mt1	-1.77573	2.31553	1.40247e-13	1.76181e-12		Aqp11	-2.26818	2.10686	2.25227e-10	1.144e-09
Plvap	-1.68323	0.449317	6.57303e-06	3.56796e-05		Cyp4f17	1.77925	5.48455	4.58329e-101	8.02424e-99		Hcn4	1.77531	0.407577	3.64093e-05	0.000186718		Ptgs1	-2.26808	3.09723	3.74985e-39	5.63741e-38
Cmah	-1.68274	1.71226	9.5391e-07	5.84043e-06		8030423F21Rik	1.77637	0.552815	0.000672594	0.00270269		Ryr2	1.77247	3.53243	2.93293e-34	9.39013e-33		Cpne9	2.268	0.818314	1.46131e-10	7.55003e-10
Lrriq1	1.67923	1.35125	0.00575479	0.0170877		Sugct	-1.77618	5.6027	5.86756e-79	5.5207e-77		Dctn6	-1.77216	4.43291	7.02977e-07	4.68798e-06		Ptpn13	2.26775	6.57746	3.1823e-164	8.80287e-162
Chst11	-1.67727	9.33492	9.77432e-166	5.63286e-163		Twf2	1.77179	1.96378	4.31547e-06	2.63171e-05		Wdr86	-1.77211	0.598077	0.000582264	0.00231683		Ica1	-2.26059	5.08596	2.16005e-82	8.60968e-81
Mt2	-1.6769	2.22242	1.87874e-09	1.59809e-08		Trpv6	1.76172	0.407564	0.000371249	0.00159464		Lipg	-1.77211	1.63089	0.000582264	0.00231683		Apobr	-2.25881	1.68459	2.50488e-13	1.53704e-12
Nat8l	1.67413	0.898944	0.0030951	0.00986366		Camk4	1.75829	6.25977	4.30793e-128	1.45324e-125		Nme5	-1.77211	0.739624	0.000582264	0.00231683		Zfp932	-2.25844	3.14635	2.59893e-39	3.92421e-38
Stk32a	1.67184	3.04913	4.26894e-20	7.37773e-19		Antxrl	-1.75689	2.78617	2.07075e-18	3.50558e-17		Moxd1	1.77012	4.54972	2.01528e-43	8.19804e-42		Asb4	-2.2548	0.590572	8.89856e-08	3.637e-07
A730004F24Rik	1.67025	0.255565	0.00167447	0.00569311		D130043K22Rik	-1.7549	0.677617	0.00146305	0.00542795		Efhb	1.7657	1.79911	5.24233e-10	4.90241e-09		Ccdc68	-2.2495	3.75147	2.75411e-79	9.94571e-78
Lgi2	-1.66931	2.58512	2.02107e-25	4.26769e-24		Lrriq1	-1.75402	1.35125	0.00668884	0.0204993		Tmem126b	-1.76501	2.33811	2.44231e-09	2.17933e-08		Aldh1a1	2.24597	3.60065	7.32773e-81	2.78565e-79
Gm11665	-1.66872	0.18796	0.00143768	0.00497239		Cd5	1.75034	2.30424	2.01221e-10	2.01381e-09		3830408C21Rik	-1.76433	2.27891	5.35544e-14	6.94851e-13		Efcab8	2.24226	3.0668	1.16628e-48	2.17103e-47
Gm6904	1.66721	0.137684	0.000910234	0.00330345		Anxa8	-1.75023	3.80356	4.61584e-38	1.53466e-36		Rsph14	1.7603	2.08052	3.27628e-16	4.86204e-15		Scn2b	2.23765	1.173	9.2728e-15	6.13646e-14
Frmpd1	1.66475	0.473992	0.000496756	0.00192293		Lsm5	1.74931	0.346909	0.00365497	0.0121724		Rps6kl1	1.75706	1.34236	0.000191941	0.000851971		Kctd8	-2.2338	5.29589	1.89496e-96	1.05258e-94
Gm4951	-1.66442	0.158087	1.67412e-05	8.50965e-05		Zfp804b	1.74231	2.1069	1.58514e-13	2.02065e-12		Tmem160	1.75627	0.329069	0.00350306	0.0113815		Mgst2	2.23304	1.08011	3.62108e-19	2.95476e-18
C030006K11Rik	-1.66217	0.320095	0.0110843	0.0300956		Dusp27	-1.74144	1.59786	1.06257e-05	6.10571e-05		Cfap77	-1.7469	0.301974	0.00153859	0.00552591		Phyh	-2.22902	2.55869	2.60958e-12	1.49826e-11
Slc25a34	1.66103	0.449294	0.000149362	0.000640366		Lrrc17	-1.7394	6.64628	5.99008e-95	9.10427e-93		Cacna1s	-1.74591	0.598036	0.00694295	0.0206423		1700027I24Rik	-2.22802	0.739559	2.38658e-09	1.12543e-08
Mterf1a	1.65633	0.94075	1.3876e-05	7.15313e-05		Clic3	-1.73885	0.856129	4.55536e-05	0.000236506		Tigd3	-1.74591	0.922842	0.00694295	0.0206423		1500015A07Rik	-2.22772	1.7862	9.39325e-09	4.20447e-08
Znhit3	1.65475	1.56039	4.27075e-06	2.38855e-05		Pisd-ps2	-1.73881	4.24378	1.32118e-28	3.33453e-27		Plekhn1	-1.74576	3.47665	1.13955e-19	2.03632e-18		Eldr	-2.22737	1.8656	3.70792e-08	1.57652e-07
Ankrd53	-1.65415	0.805458	0.000855447	0.00311853		Slc44a5	1.73703	1.85303	8.65497e-09	7.43059e-08		1700007K13Rik	1.74079	1.38203	4.14309e-09	3.6017e-08		Mast1	-2.22695	0.33794	1.46873e-07	5.8745e-07
B130034C11Rik	-1.65415	0.612912	0.000855447	0.00311853		B3galnt1	1.73088	5.2312	1.18973e-78	1.10437e-76		Mctp2	1.7402	4.19462	1.97814e-28	5.22131e-27		Tspan32	2.22624	1.2173	6.72903e-13	4.01853e-12
Wisp3	1.65082	1.3066	3.99263e-08	2.98014e-07		0610040J01Rik	1.7286	3.41053	8.49414e-35	2.58772e-33		Gstm4	1.7381	0.998103	1.93135e-06	1.21145e-05		Apob	2.22575	0.0960929	4.28692e-10	2.13897e-09
Bdkrb2	1.65073	3.2724	2.88863e-35	8.28892e-34		Fam189a1	1.7255	3.59474	2.31466e-34	6.97474e-33		Synpr	1.73659	3.62894	5.38717e-18	8.78656e-17		1700024B18Rik	-2.22501	1.12754	9.39087e-06	3.04252e-05
Xdh	-1.65004	1.39055	6.51106e-10	5.74327e-09		Bcl2l14	1.72237	0.178075	0.00108899	0.00416648		Apol6	-1.73622	2.27685	7.34671e-16	1.07413e-14		L3mbtl4	-2.22248	0.0642557	0.000155868	0.000423206
Galnt18	-1.64748	9.39666	1.09979e-170	6.91418e-168		Sp100	1.72237	1.06954	0.00108899	0.00416648		Gnaz	1.73303	2.03179	1.26617e-15	1.82042e-14		Lrrc75b	2.2178	1.80241	1.45478e-10	7.52189e-10
8430429K09Rik	-1.64556	2.26244	2.90251e-14	3.54948e-13		Nfam1	1.72237	0.197868	0.00108899	0.00416648		BC051019	1.73194	0.837392	3.22962e-05	0.000167174		Serpinb10	2.21338	0.236537	9.64373e-08	3.92301e-07
Cntnap2	-1.64347	3.68167	5.64854e-36	1.6765e-34		Tdrp	-1.717	2.04237	1.32707e-07	9.92683e-07		Perm1	-1.72905	2.24345	9.85858e-08	7.32299e-07		Col13a1	-2.21038	0.178121	0.0120117	0.0232583
Elovl7	-1.64308	2.59654	2.9319e-08	2.21833e-07		Hal	1.70847	1.24612	6.09118e-06	3.63919e-05		Rnf223	1.72586	0.56808	1.78853e-05	9.65917e-05		Mapk4	-2.20363	3.44452	3.96454e-26	4.19537e-25
Mmp24	-1.64286	1.30165	3.69838e-06	2.08444e-05		Clu	1.70841	3.15398	7.34319e-15	1.0259e-13		Tub	1.72586	1.39488	1.78853e-05	9.65917e-05		Gipc2	-2.20052	0.63457	4.58494e-13	2.77039e-12
Plppr4	1.63756	2.17065	1.1056e-15	1.47745e-14		Pclo	-1.7083	2.90316	8.10127e-14	1.05408e-12		Slc16a12	1.71798	1.29745	2.0538e-09	1.83977e-08		Il20ra	-2.19856	2.41639	2.41744e-07	9.4451e-07
Noct	-1.63623	9.20471	1.02518e-179	8.34073e-177		A330015K06Rik	1.70515	7.96612	2.81741e-147	1.3917e-144		Gldc	1.71316	2.765	1.74751e-15	2.49688e-14		Fam109b	2.19144	1.80562	8.40189e-11	4.40844e-10
Mannr	-1.63523	1.86868	1.08631e-08	8.5514e-08		Clcn6	-1.70343	6.29969	0.0185699	0.0491655		Gria2	-1.7129	0.663377	0.00410883	0.0130702		Pi16	2.18713	0.605549	2.31467e-05	7.09063e-05
Gm5089	-1.63251	2.94504	0.000304616	0.00122654		Tssk4	-1.70343	0.085607	0.0185699	0.0491655		Pgbd1	-1.71058	0.772976	0.000127586	0.000589391		Slco1c1	-2.18472	0.473901	1.55675e-05	4.87246e-05
Ramp3	-1.63245	1.13262	1.64413e-14	2.04864e-13		Cntnap5b	-1.70343	1.52176	0.0185699	0.0491655		Abca8a	-1.70968	0.86241	4.31343e-06	2.58488e-05		Isg20	2.18138	2.59572	8.48035e-48	1.54535e-46
Samd9l	1.63159	3.79008	8.82062e-42	3.03478e-40		Orm3	-1.69654	0.274281	0.00232246	0.00821496		Lsmem1	-1.7081	3.49872	3.34199e-23	7.13319e-22		Frmd5	2.17758	3.97815	5.21671e-62	1.24186e-60
Slc6a20b	-1.62943	3.10272	1.08086e-13	1.26689e-12		Cd4	-1.69654	0.390527	0.00232246	0.00821496		Ano5	1.70788	3.77588	2.43161e-32	7.31123e-31		Fgd3	-2.17207	5.72134	2.35604e-120	2.4501e-118
1700042O10Rik	1.62909	0.83102	3.7066e-06	2.08738e-05		A330093E20Rik	-1.69654	1.50594	0.00232246	0.00821496		Cdh8	-1.70781	4.99742	8.6606e-66	6.04973e-64		Lat2	-2.16818	2.861	1.18286e-19	9.87933e-19
Sh3gl3	1.62909	1.55282	3.7066e-06	2.08738e-05		Cntnap2	-1.6942	3.68167	9.64643e-26	2.22366e-24		Acss1	-1.70495	1.6953	6.29595e-07	4.23537e-06		Slc4a5	-2.16796	1.59059	4.71335e-12	2.66845e-11
Dlk2	1.62673	0.346876	2.17426e-05	0.000108642		Gstm2	-1.69046	1.85927	8.58978e-07	5.79538e-06		Hook1	-1.70199	0.824705	0.000551654	0.0022071		Lmcd1	2.16715	7.24531	1.04494e-174	3.70578e-172
4933412O06Rik	-1.62636	0.805407	0.00380751	0.0118261		Hapln1	1.68686	2.41871	3.39842e-27	8.17453e-26		Ndst3	-1.69996	4.71812	1.31795e-46	5.69643e-45		Sft2d2	-2.16689	4.1846	1.20356e-48	2.23142e-47
Mreg	-1.62636	0.381837	0.00380751	0.0118261		Nol10	1.68384	6.73809	0.0111057	0.031934		Lrp2	-1.69796	4.7024	2.46738e-15	3.49298e-14		1110001J03Rik	-2.16659	0.805588	0.000260723	0.000682578
9430065F17Rik	1.61996	0.283604	0.000430306	0.00168218		Elavl2	1.68222	3.94348	4.99083e-48	2.06054e-46		0610037L13Rik	-1.69781	4.3156	9.28508e-37	3.19458e-35		Spx	-2.16628	1.16303	2.65333e-09	1.2457e-08
Krt8	1.61996	0.187956	0.000430306	0.00168218		Hist1h4k	-1.68021	0.355763	0.000184881	0.000848968		Fst	-1.69624	4.73855	3.30878e-42	1.30753e-40		Iglon5	-2.1644	1.48193	1.83724e-11	9.99249e-11
9530059O14Rik	-1.61478	1.00954	0.00224544	0.00740503		Irf6	-1.68021	0.537288	0.000184881	0.000848968		Gm4532	-1.69524	0.106691	0.019125	0.0490119		Vnn1	-2.16276	0.274254	1.58355e-06	5.62601e-06
Peli3	1.61258	1.94069	2.26441e-15	2.97427e-14		Gm11351	1.68002	1.46582	9.6049e-06	5.56537e-05		Fam24a	-1.69524	0.106648	0.019125	0.0490119		Col14a1	-2.16266	7.113	1.71067e-115	1.58794e-113
Nyap2	1.60775	1.31555	0.00497578	0.0149935		Pyroxd2	1.67811	3.82909	1.07106e-40	3.78869e-39		Troap	-1.69524	1.46573	0.019125	0.0490119		C4b	2.15867	0.946639	0.000376598	0.000964758
Serpina3n	1.60775	0.187912	0.00497578	0.0149935		Ccdc60	-1.6778	0.432826	0.00137274	0.0051204		Ntf3	-1.69358	3.74355	2.08792e-19	3.69284e-18		5430403N17Rik	-2.15101	0.311077	0.00109081	0.00257854
Gm10389	-1.60252	6.02206	3.41293e-70	2.18538e-68		1700125H20Rik	1.67613	0.178128	0.0059579	0.0185678		Misp	1.69217	1.35143	5.1369e-08	3.97141e-07		Cyyr1	-2.15101	0.568102	0.00109081	0.00257854
Eci3	1.60222	0.0534861	0.00931541	0.0259238		Adgrv1	1.67271	2.96262	2.19895e-26	5.17238e-25		Kazald1	1.69067	0.719255	0.0107326	0.0300308		Slc9b2	2.14805	0.575661	0.000122171	0.000337477
Lrrn2	-1.6022	2.91871	1.21588e-20	2.14774e-19		Hist1h3c	-1.67261	0.390413	0.0107536	0.0310766		Ret	1.68992	4.72193	2.03225e-56	1.12884e-54		Ctla2a	2.146	2.12203	2.52485e-30	3.01045e-29
Serinc2	-1.60075	2.97363	1.51331e-08	1.17521e-07		Hormad2	-1.67261	0.292701	0.0107536	0.0310766		Lgals3bp	1.68907	4.66466	1.27918e-66	9.263e-65		Malrd1	-2.14328	0.498026	2.57067e-05	7.83493e-05
Ttll11	-1.59584	5.19798	1.52234e-74	1.05277e-72		Spta1	1.67252	1.58327	6.02539e-10	5.7873e-09		Chmp4c	1.68681	1.77625	9.00016e-09	7.50791e-08		Grip1os1	-2.14278	1.36449	1.16343e-10	6.06307e-10
Ipcef1	1.59455	0.373266	0.0176109	0.0445703		Htr2a	-1.66766	5.83511	1.27481e-77	1.16e-75		Hexim2	1.6831	0.137735	0.0057253	0.0174574		Grem1	2.14237	3.41726	1.20878e-71	3.69065e-70
Acpt	-1.59385	1.8278	1.68052e-07	1.14781e-06		Myo1a	1.66627	0.217348	0.00175062	0.0063785		Ttyh1	1.68251	2.17813	1.58384e-09	1.43197e-08		Adra1a	2.14028	0.986944	3.99338e-05	0.000118754
BC049715	-1.59215	0.590616	0.000469165	0.00182378		Rab3b	-1.66429	0.940711	9.27315e-06	5.38216e-05		Zfp239	1.67792	2.09907	1.57075e-10	1.54516e-09		Car10	-2.13661	3.99486	7.90809e-77	2.70066e-75
Id4	1.59023	1.78942	1.64786e-13	1.90724e-12		Rbm20	1.66425	3.85681	3.15938e-33	9.25792e-32		Abcc2	1.6776	0.117135	0.003077	0.010174		3830408C21Rik	-2.13502	2.27891	2.6266e-16	1.89606e-15
Pex11a	-1.58702	0.874576	0.000279763	0.00113873		Irx1	-1.66269	2.96995	1.01687e-08	8.65501e-08		Esr2	1.67694	2.14538	8.8223e-11	8.84853e-10		Slc5a7	2.1331	3.39077	2.42329e-30	2.89185e-29
BC029722	-1.58701	0.849794	3.12805e-06	1.78042e-05		Srp54c	-1.65967	3.18462	6.97368e-08	5.4005e-07		Mrpl43	-1.67234	1.38616	0.000198524	0.000878934		Tbc1d2	-2.1312	4.54705	7.93462e-67	2.14343e-65
Slc16a13	1.58604	1.10659	0.000202761	0.000848784		Msx2	-1.65913	0.677597	6.6123e-05	0.000331974		Jph3	-1.66999	1.85918	5.28852e-08	4.08178e-07		Mslnl	-2.1304	0.177977	6.7135e-08	2.77841e-07
Dnajc6	1.58496	1.84987	2.23375e-08	1.70785e-07		Fgfbp3	-1.65132	0.568042	0.00625945	0.0193722		Ifi30	-1.66986	1.89851	0.00144752	0.00523825		A930001C03Rik	-2.12916	3.8797	8.21128e-41	1.29351e-39
Plxna4	-1.57994	6.38452	7.23793e-91	8.34231e-89		Grid2	1.6504	7.13473	8.00387e-94	1.16528e-91		Grin2d	1.66876	3.59989	4.3294e-23	9.19815e-22		4933427G17Rik	-2.12873	0.338009	0.000104941	0.000292689
Emb	-1.57951	4.48091	5.91043e-41	2.00361e-39		Hilpda	1.65039	2.27443	1.0205e-13	1.31666e-12		Pkp1	-1.6687	1.78629	3.58261e-07	2.49628e-06		Matn4	2.12709	2.21948	4.04311e-30	4.7959e-29
Inpp4b	1.57735	5.37974	1.91331e-107	2.84549e-105		Unc13d	1.64497	1.87168	4.55426e-08	3.60767e-07		Tslp	1.66749	0.940757	0.000492783	0.00199173		B4galnt4	-2.12562	0.432876	0.00467766	0.00986682
Cldn15	1.57589	1.04795	0.000676491	0.00253222		Trhde	-1.6449	3.02764	6.7816e-12	7.63192e-11		Aox2	1.66749	0.0643161	0.000492783	0.00199173		Fam20a	-2.12503	5.70818	1.91622e-94	1.01157e-92
1810011O10Rik	-1.57561	2.34037	5.9969e-05	0.000276293		Tomt	-1.64093	1.07489	0.000286927	0.00126667		Nmnat3	-1.66441	4.53785	2.89078e-60	1.75361e-58		4921509O07Rik	2.1116	1.14284	6.8646e-10	3.3716e-09
Prkcb	-1.57446	1.99509	3.32389e-12	3.54454e-11		Fhl5	1.64038	3.29752	8.9132e-14	1.15646e-12		Trim71	1.66224	3.83498	1.65187e-17	2.60513e-16		Csmd3	-2.10339	4.67054	5.07921e-84	2.07842e-82
Ube2ql1	-1.5742	1.90518	7.01863e-10	6.17523e-09		Gm10560	-1.63727	1.53741	6.43648e-08	5.0041e-07		Noct	-1.65942	9.20471	1.00356e-166	7.30536e-164		Adcyap1r1	2.10289	5.16151	2.32819e-127	3.00946e-125
Atp2a1	-1.57273	0.946481	3.59981e-05	0.000173723		Ccdc40	-1.63573	0.61292	0.00366021	0.0121822		Cadm2	-1.65614	6.7926	1.14712e-103	2.60095e-101		Arhgef39	-2.09971	2.53897	5.28947e-29	6.08641e-28
Hs3st5	-1.57235	8.16111	1.28713e-154	6.1387e-152		Sox15	-1.63573	0.217321	0.00366021	0.0121822		Dnajc6	1.65374	1.84987	2.24902e-07	1.60922e-06		Gm13157	-2.09945	2.18693	3.59233e-49	6.76914e-48
Nrg2	-1.57073	2.68672	1.58561e-10	1.48079e-09		Itih5	-1.6326	2.39934	2.09394e-09	1.9129e-08		2810025M15Rik	1.65329	1.8023	1.25494e-07	9.22886e-07		Rogdi	-2.09614	1.46999	4.23678e-06	1.42854e-05
Cntn6	1.57054	1.49787	7.33462e-07	4.54503e-06		Akr1b8	1.63131	3.85225	1.94019e-46	7.77821e-45		4930412B13Rik	1.65325	3.83355	7.22401e-31	2.04745e-29		Npy2r	2.09534	0.506065	0.0217356	0.0395352
Mfap1b	-1.56843	1.18275	0.0101943	0.0280202		Ccdc68	-1.62747	3.75147	3.98305e-21	7.63014e-20		2010310C07Rik	1.65095	1.83734	2.15095e-09	1.9243e-08		Fez1	-2.09452	3.28833	7.72519e-28	8.6167e-27
Dubr	-1.56566	2.69871	1.46808e-14	1.83424e-13		Fbxw18	-1.62382	1.41577	0.00214876	0.00768144		Mrfap1	-1.64927	2.45098	6.19731e-06	3.59392e-05		Lmx1a	2.0938	1.06978	0.00659738	0.0135243
Gbx1	-1.56293	1.17811	0.00594149	0.0175892		Rims2	1.62224	5.37039	9.67282e-42	3.48398e-40		Rnls	1.64924	4.31464	7.41906e-49	3.35337e-47		Il18r1	2.0938	1.9528	0.00659738	0.0135243
Iqcd	-1.56234	1.40759	2.85321e-06	1.63272e-05		Fbxo41	-1.62145	1.76619	3.09261e-06	1.93284e-05		Apoe	1.64697	2.52974	6.9746e-17	1.06357e-15		Irgm1	-2.0907	3.12816	8.97894e-44	1.52004e-42
Dupd1	1.56123	0.255571	0.00229063	0.00753967		Slc4a10	-1.61918	2.82368	6.08825e-05	0.000308902		Fmn2	-1.64513	3.3432	3.22938e-13	3.94921e-12		Fam72a	2.09065	1.71583	2.68421e-15	1.83154e-14
Mns1	-1.55875	0.301951	0.00348236	0.010939		Rbfox1	1.61543	7.0288	1.67162e-33	4.96141e-32		4930481A15Rik	-1.64302	1.29273	0.000514186	0.00206976		Gm30551	-2.08855	1.68824	4.90629e-10	2.43571e-09
Thnsl1	-1.55815	1.6775	6.29888e-07	3.94029e-06		Fam198a	1.61316	2.52215	3.45522e-09	3.08715e-08		Mx2	1.6352	3.83754	8.44183e-40	3.19014e-38		Apol6	-2.08763	2.27685	5.1888e-11	2.75177e-10
Stag3	-1.55546	1.64554	0.0020504	0.00682199		Efcab11	-1.61225	3.93742	6.3329e-29	1.61012e-27		A930005H10Rik	-1.63306	0.843702	0.000307316	0.00129944		Fgf10	2.08445	3.27668	1.67932e-29	1.96171e-28
Pla2g7	-1.55546	2.50827	0.0020504	0.00682199		Fbxl13	-1.61051	6.81195	4.57795e-96	7.19518e-94		Tmem141	1.631	1.251	3.65453e-06	2.21014e-05		Plscr4	2.0827	2.69172	5.3307e-23	5.10234e-22
Pzp	1.55462	0.364518	0.000173394	0.000735872		Alx1	1.6079	1.75269	0.00279292	0.00963075		Stac	-1.62994	4.16982	3.08284e-19	5.37012e-18		Tagap	2.07974	1.52943	6.05127e-17	4.49974e-16
Cntnap4	1.55402	2.04545	5.27356e-18	8.15868e-17		Lrrc9	1.6079	0.168127	0.00279292	0.00963075		C1s1	-1.6288	1.95821	1.12043e-13	1.41782e-12		9030625G05Rik	-2.07866	0.187992	0.00017306	0.000467042
Cthrc1	-1.553	5.4846	1.04747e-65	6.01142e-64		Kcng2	-1.60055	0.969671	0.000442902	0.00186477		Cadps	1.62788	1.11188	3.88912e-05	0.000198489		Fgl2	-2.07819	2.96153	0.00182747	0.00416336
Pdlim3	1.55048	3.32862	1.27496e-19	2.14787e-18		A330049N07Rik	1.59904	0.407617	0.00962223	0.0283039		Tsnaxip1	-1.62776	0.843515	0.00382973	0.0123077		Ptgir	-2.0769	0.874808	0.0209211	0.0381993
Medag	1.5499	5.9884	1.87837e-111	3.13009e-109		Akt1	1.59203	5.93379	0.0181018	0.0481687		Sfi1	1.62673	4.42605	1.50802e-19	2.68781e-18		Ces1a	-2.0769	0.691715	0.0209211	0.0381993
Gm5468	1.54743	1.55653	7.89348e-09	6.29612e-08		Npy2r	1.59203	0.506065	0.0181018	0.0481687		Map3k7cl	-1.62527	4.32787	1.30496e-17	2.0722e-16		Ak7	-2.07183	1.60546	8.84895e-12	4.93706e-11
Sgpp2	1.54527	3.45401	3.73074e-14	4.51048e-13		E030030I06Rik	-1.59039	3.40861	1.03847e-16	1.61201e-15		4930447K03Rik	1.62419	0.137798	0.000233558	0.00101711		E130006D01Rik	-2.06709	0.226876	7.22207e-08	2.9773e-07
Vwce	1.54452	3.09097	2.19141e-18	3.43255e-17		Zfyve28	1.59017	4.21571	5.67417e-35	1.74399e-33		Trhde	-1.62126	3.02764	1.57655e-14	2.12114e-13		A230077H06Rik	2.06567	0.0855577	5.09555e-08	2.13954e-07
Prkcz	1.54137	2.42658	2.51035e-08	1.91193e-07		Ctdspl2	-1.58633	5.03042	0.0171273	0.0459886		Vstm2b	-1.61752	2.09593	0.000110309	0.000519119		Kcnj14	2.06411	1.92287	3.10984e-20	2.66329e-19
Mfsd4b3	1.53986	0.7926	0.000576644	0.00219833		6230400D17Rik	-1.58059	1.09092	3.32256e-05	0.000176611		Malrd1	-1.61588	0.498026	0.00226006	0.00778166		Ciita	-2.06295	2.52966	1.85921e-15	1.27807e-14
Cnih3	1.53818	0.207586	0.00792772	0.0225986		Cerkl	1.57937	1.79274	2.26473e-10	2.25999e-09		Pradc1	-1.61588	0.656244	0.00226006	0.00778166		Angpt1	2.06201	7.5244	3.51062e-133	5.33576e-131
Lmx1a	1.53723	1.06978	5.36294e-07	3.38389e-06		Artn	-1.57817	1.02615	0.00986646	0.0289055		Rab11fip4	1.6156	1.70568	9.428e-08	7.02958e-07		Ush2a	-2.06169	1.47793	3.24823e-10	1.63546e-09
Scube1	-1.53385	4.41494	4.41858e-11	4.31897e-10		Cyp2s1	-1.57817	0.207616	0.00986646	0.0289055		Mir6346	1.61505	0.0534972	0.00266089	0.00896098		Hck	2.06112	4.75915	3.58366e-97	2.03138e-95
Prtg	-1.53183	3.24398	3.19442e-16	4.46734e-15		Trim7	-1.57511	2.8052	1.80053e-08	1.48853e-07		Gm14164	1.61505	0.117102	0.00266089	0.00896098		Etnk2	2.05603	0.77302	4.1375e-06	1.39677e-05
4930431P03Rik	1.53044	0.207677	0.00105657	0.00377216		Kcnab1	1.57147	8.84678	1.32836e-162	7.349e-160		Plek	-1.61163	2.62016	1.13218e-07	8.35158e-07		Mpp4	-2.05481	3.88889	3.99566e-38	5.81115e-37
Hpse	1.53044	0.818354	0.00105657	0.00377216		Cela2a	1.57104	1.49822	3.96107e-09	3.51866e-08		Ipcef1	1.61117	0.373266	0.00494836	0.0153696		Olr1	2.05295	4.16525	6.24277e-91	2.99805e-89
Nell2	-1.53001	5.00799	4.82039e-30	1.17378e-28		5033428I22Rik	1.57022	1.85631	2.58122e-07	1.8672e-06		Mrps17	-1.611	3.48236	4.5148e-24	9.9592e-23		Gm14023	2.04768	0.301962	3.81747e-05	0.00011389
Kcnk2	-1.52584	3.65772	7.21447e-23	1.38781e-21		Kazald1	-1.56773	0.719255	0.00333978	0.01125		Kcnj14	1.60743	1.92287	3.15633e-06	1.92229e-05		Ppp2r2b	-2.04555	5.09717	1.05223e-68	3.01312e-67
Syndig1	1.52564	6.33539	4.86761e-113	8.63127e-111		Angptl6	-1.56694	2.48816	9.31495e-07	6.24201e-06		Pex5l	1.60548	1.63131	4.45554e-09	3.85153e-08		Siah3	2.04176	0.127472	0.000117024	0.000324036
Thrb	-1.52281	6.18679	1.90433e-67	1.1603e-65		Hook1	-1.56135	0.824705	0.00115175	0.00438354		Adam8	-1.60539	3.11272	1.66845e-12	1.93756e-11		Rasl12	-2.03972	0.69864	2.77774e-05	8.43261e-05
Thsd7b	1.52083	4.37553	1.02423e-08	8.0949e-08		Ctf1	1.5596	2.05084	9.49813e-11	9.86992e-10		Sft2d2	-1.60259	4.1846	1.05431e-36	3.61842e-35		Gm973	2.03881	1.7227	6.0165e-14	3.82946e-13
Ddi1	1.52083	1.7894	1.02423e-08	8.0949e-08		Katnal2	-1.55956	1.85618	2.70475e-08	2.18896e-07		2310001H17Rik	1.60023	2.04269	1.84347e-13	2.29703e-12		Phf11d	2.03658	1.22694	2.06602e-10	1.05443e-09
Ncf1	1.51909	1.00932	0.00194355	0.00649618		Prkar1b	-1.55727	4.03689	5.99584e-28	1.48617e-26		St6galnac5	-1.59911	1.72599	4.65309e-07	3.21303e-06		4933406M09Rik	-2.03588	1.66717	1.13171e-06	4.07305e-06
Nmnat3	-1.51842	4.53785	2.04578e-27	4.66916e-26		Rasgef1a	1.55687	0.373233	0.00239549	0.00843483		Fam196b	1.59888	1.24099	0.0175394	0.0455306		Tmc7	2.03173	4.32477	7.20317e-76	2.40065e-74
Abcb1b	-1.51679	4.89151	1.50499e-32	3.9953e-31		Mrvi1	1.55653	6.00557	1.38088e-69	9.79436e-68		Fpr1	1.59888	0.952193	0.0175394	0.0455306		Dnah7c	-2.03117	1.52168	8.79808e-11	4.61457e-10
Rnf182	-1.51632	0.952421	1.77653e-05	8.99712e-05		Gabrb2	-1.55391	2.39071	2.94693e-10	2.90513e-09		4632428C04Rik	1.59888	0.178002	0.0175394	0.0455306		Mamdc2	-2.03072	4.52686	1.99412e-73	6.31138e-72
Styk1	-1.51567	3.00704	2.95616e-05	0.000144783		Plbd1	1.55163	2.01216	4.61745e-11	4.90883e-10		Mab21l2	-1.59702	0.465815	1.44369e-05	7.92996e-05		Mpp7	-2.02777	7.08735	8.41641e-136	1.32281e-133
Eqtn	-1.51494	1.19292	4.92544e-05	0.000231658		Rnf17	-1.54897	1.35549	1.07924e-05	6.19636e-05		Hcn1	-1.59602	5.67717	2.2367e-82	2.66688e-80		Cfi	2.02614	0.292765	2.30654e-06	8.02155e-06
Dcc	-1.51339	6.26888	2.8291e-69	1.77056e-67		Rpl7a	-1.54791	5.24589	4.10208e-46	1.62567e-44		Fam185a	-1.59136	6.54998	3.89438e-98	7.08726e-96		2900057B20Rik	2.02614	0.12742	2.30654e-06	8.02155e-06
Stk10	1.51178	6.51764	1.31556e-91	1.55517e-89		Adrbk2	1.54747	2.21984	7.04641e-07	4.81279e-06		Lzts3	1.59009	1.99818	6.85442e-09	5.78744e-08		Ccdc7b	2.02466	0.575474	3.92597e-11	2.09249e-10
Tstd1	1.51035	0.457598	6.9062e-05	0.00031452		B4galnt3	1.54706	0.197898	0.00441992	0.0143395		Slc29a4	-1.58742	1.13245	0.000282338	0.00120451		Hal	2.02312	1.24612	1.60179e-08	7.02197e-08
Tssk4	1.50854	0.085607	0.00048884	0.00189494		Gm2516	1.54706	0.246058	0.00441992	0.0143395		Capn11	-1.58742	0.874606	0.000282338	0.00120451		Ptprr	2.02308	2.46004	0.00113086	0.002665
Car8	-1.50788	1.24594	0.00109399	0.00389171		Myh3	1.54706	1.03702	0.00441992	0.0143395		Efcab8	1.58639	3.0668	2.4513e-14	3.2382e-13		Celsr2	2.0212	2.56987	2.72924e-24	2.73141e-23
Pebp4	-1.50788	0.892993	0.00109399	0.00389171		Sema5b	-1.54654	2.91654	1.4022e-06	9.13944e-06		Rbm46	1.58574	1.65633	2.71524e-06	1.66909e-05		Lgi2	-2.02069	2.58512	1.48932e-11	8.16115e-11
Nlrp5-ps	1.50787	4.46112	2.43331e-82	2.15738e-80		Kcns3	-1.54432	3.93786	8.64895e-30	2.27855e-28		0610040J01Rik	1.58324	3.41053	1.80321e-28	4.77782e-27		Gm26705	-2.01901	1.9172	7.93145e-09	3.56631e-08
Spats1	-1.50731	2.09093	1.40259e-08	1.0923e-07		Bend6	1.54316	4.59344	2.9869e-27	7.22235e-26		Tinag	-1.57928	1.39067	7.02952e-07	4.68798e-06		Galntl6	-2.01609	1.52559	6.13137e-12	3.44868e-11
Asb14	-1.50643	3.17035	6.24321e-13	7.02031e-12		Cntn1	1.54136	1.55278	9.20638e-09	7.87955e-08		A430078I02Rik	1.57914	2.17583	4.98549e-11	5.1153e-10		9530062K07Rik	-2.01537	0.892985	4.50752e-06	1.5154e-05
Ssc4d	-1.50589	0.772964	0.00185061	0.00622162		Syndig1	1.541	6.33539	3.87978e-103	6.96899e-101		Vipr2	-1.57827	0.217329	0.0176885	0.045849		Slc22a4	2.01315	2.52525	7.3554e-38	1.05861e-36
Cldn20	-1.50346	0.264968	0.00314238	0.0100005		Nebl	-1.53783	3.39681	4.34297e-21	8.28519e-20		Btbd16	-1.57827	1.10666	0.0176885	0.045849		Trim9	2.00755	2.58545	4.26897e-07	1.61651e-06
Nqo2	-1.50306	3.65826	2.49077e-15	3.26539e-14		Nmnat3	-1.53701	4.53785	3.6512e-28	9.09904e-27		Slfn10-ps	-1.57827	0.670527	0.0176885	0.045849		Pnmal2	2.00706	0.399112	0.00359067	0.00774752
Fndc8	1.50185	0.874676	0.000125055	0.000545109		1700108J01Rik	1.53444	0.158066	0.00821028	0.024574		Gm19689	1.57511	2.22199	4.02081e-07	2.78617e-06		Plpp4	2.00706	0.390548	0.00359067	0.00774752
						Grik3	1.53034	0.656518	7.18151e-06	4.25385e-05		Klf5	1.57494	4.42294	1.27935e-58	7.40361e-57		Adamts16	-2.00582	3.78409	4.6157e-24	4.5961e-23
						Cd59a	1.52896	4.61981	2.17381e-24	4.74976e-23		Kcp	-1.57245	2.71956	4.38775e-10	4.13117e-09		Prss36	-2.00395	1.72956	3.10369e-08	1.32532e-07
						Fmod	-1.52714	4.17152	4.49474e-34	1.3456e-32		Rasgef1a	1.57198	0.373233	0.001233	0.00454643		Vmn2r57	2.0023	0.197838	6.45967e-05	0.000186172
						Clec9a	1.52564	0.117126	0.00111315	0.00425187		Olfr1318	1.56531	1.82782	1.35491e-10	1.34143e-09		Dok7	2.00091	2.41798	2.17058e-27	2.39404e-26
						Hfe	1.52564	0.147977	0.00111315	0.00425187		Cys1	1.56409	1.68805	0.00227549	0.00782894		St8sia4	1.99243	0.560437	3.86294e-06	1.31016e-05
						Gm3716	1.52554	1.76661	2.56819e-12	2.99499e-11		Gm10037	-1.55981	0.824658	0.00350389	0.0113815		Galnt14	-1.98977	4.90579	5.4909e-71	1.64027e-69
						Ednrb	-1.52545	0.620199	3.50261e-06	2.17045e-05		Upk1a	-1.55347	0.880753	0.00122098	0.00450449		Apol8	-1.98965	1.44918	5.12584e-15	3.4432e-14
						Best3	-1.525	2.79028	5.8359e-06	3.4927e-05		Fbxl13	-1.55334	6.81195	2.78328e-91	3.92812e-89		Mtcl1	-1.98842	5.87879	1.30541e-86	5.6072e-85
						Etnk2	1.52496	0.77302	1.28649e-05	7.28942e-05		Cerkl	1.55294	1.79274	2.06524e-10	2.00734e-09		Cacnb2	-1.98676	7.92202	6.88721e-138	1.13401e-135
						Trcg1	-1.52398	1.76957	1.62497e-05	9.04788e-05		Nudt13	-1.55195	2.78953	1.74145e-12	2.01725e-11		Eqtn	-1.98659	1.19292	1.21698e-07	4.90302e-07
						Gm32014	1.51819	1.63856	6.7415e-09	5.83856e-08		Ptgir	1.55125	0.874808	1.10768e-06	7.16909e-06		Scg3	-1.98462	0.227015	0.0011822	0.00277795
						Txlnb	-1.51775	1.17804	0.000612409	0.00248467		Klhl1	-1.55114	0.407501	0.000724432	0.00281134		Lypd6	-1.98415	3.88161	5.88984e-26	6.17607e-25
						Mthfsl	-1.51775	2.28073	0.000612409	0.00248467		Lrriq1	1.54989	1.35125	9.18618e-08	6.86408e-07		Cdkl1	1.98309	1.35561	2.90277e-14	1.87608e-13
						Ube2u	1.5176	0.264878	0.0153846	0.0421106		Tpd52	-1.54926	6.11729	9.81041e-77	9.55548e-75		1700007K09Rik	1.98289	0.236472	1.48354e-08	6.52428e-08
						1700110K17Rik	1.5176	0.0642358	0.0153846	0.0421106		Col9a2	1.54717	1.8055	1.98911e-06	1.24542e-05		4921539E11Rik	1.98101	0.560486	0.011672	0.0226704
						Ubap2	-1.51622	6.99566	0.00103733	0.00398205		Hist1h3d	-1.54486	0.575602	9.19546e-05	0.000437654		Gbp3	1.97329	1.2078	0.000616645	0.00152056
						A730090N16Rik	1.51527	5.31418	8.00338e-68	5.19694e-66		Dusp27	-1.54377	1.59786	5.514e-05	0.000273642		Pnp2	1.96912	0.381861	2.13627e-06	7.46506e-06
						Kcna4	1.51448	0.147949	0.00203774	0.00730724		Sh2d4a	1.54302	2.48234	1.5131e-11	1.62482e-10		Clic5	1.9631	1.72245	3.23732e-20	2.76562e-19
						Gm19299	1.51448	0.799055	0.00203774	0.00730724		Nkain4	1.54255	1.5678	4.44142e-05	0.00022444		Hyal1	-1.96178	0.77279	2.30563e-10	1.17024e-09
						Cln3	-1.51426	4.25891	6.22384e-38	2.05938e-36		Atp5g1	-1.54043	3.2557	8.22831e-14	1.05278e-12		Uchl1	-1.96126	2.75073	9.88121e-39	1.46638e-37
						Unc5a	-1.51216	0.843611	0.00300669	0.0102858		Lrrc17	-1.53983	6.64628	4.99103e-86	6.27554e-84		Trappc3l	-1.95799	1.28835	7.27356e-05	0.000207381
						Ociad2	1.51185	1.90199	6.1252e-06	3.65635e-05		Prom1	-1.53784	2.32244	5.81734e-07	3.94023e-06		Grm8	1.95613	4.45539	5.81175e-88	2.56812e-86
						Esr1	-1.51071	4.02214	5.03565e-20	9.26171e-19		Ctnna2	1.53771	9.38626	6.34189e-186	5.48217e-183		1700007B14Rik	1.95535	0.892749	9.71054e-16	6.81067e-15
						Ldhc	-1.50938	0.663447	0.00515213	0.0163214		D030047H15Rik	1.53706	2.20764	6.58927e-09	5.57408e-08		Hmga2-ps1	-1.95368	1.84361	6.53645e-12	3.66757e-11
						Bfsp1	-1.50938	0.58319	0.00515213	0.0163214		Itgb6	1.53614	1.28362	8.04619e-05	0.000387894		S100a1	-1.95288	0.893028	2.90285e-05	8.78541e-05
						Ano5	1.50901	3.77588	4.9911e-29	1.27131e-27		Bend6	1.53593	4.59344	2.94243e-31	8.4962e-30		Gprin3	-1.9499	3.51243	1.2417e-23	1.21457e-22
						AA415398	-1.50725	1.66358	1.13711e-06	7.54672e-06		Pde11a	-1.53368	2.04263	2.01006e-10	1.95507e-09		1700086O06Rik	-1.94655	3.51214	1.52341e-25	1.58067e-24
						Pcdh15	-1.50486	2.17046	3.14698e-06	1.96328e-05		Trpc4	1.53295	2.62332	0.00104843	0.00392232		Rorb	1.9457	3.38513	9.87889e-38	1.41591e-36
						C1s1	-1.50486	1.95821	3.14698e-06	1.96328e-05		Scd4	1.52816	1.29756	2.50754e-07	1.7868e-06		Slc6a17	-1.94431	5.19722	2.46627e-67	6.75466e-66
						Add2	1.50345	0.705558	0.000518838	0.00214211		Gpr156	1.52697	2.07245	7.23842e-11	7.29698e-10		Elfn1	-1.94425	4.31393	7.39838e-52	1.466e-50
						Cep72	-1.502	1.89888	8.73965e-06	5.08746e-05		Gm11201	1.52318	2.56246	2.98741e-12	3.39794e-11		Acad12	1.94339	3.34757	7.20102e-48	1.31395e-46
						Angptl8	-1.50111	0.301931	0.0154104	0.042156		Rnu3a	1.52303	5.01239	1.01856e-49	4.74335e-48		Podxl	-1.94325	2.23893	5.39282e-15	3.61552e-14
						She	1.50077	0.274364	0.00374809	0.0124406		Gm5820	-1.52294	3.06141	3.48519e-12	3.935e-11		Atp2b4	-1.94311	4.81712	1.18733e-84	4.91674e-83
												44265	-1.51968	2.15765	1.93098e-07	1.39029e-06		Bend6	1.9401	4.59344	1.16723e-47	2.11585e-46
												A230108P19Rik	-1.51968	1.65985	1.93098e-07	1.39029e-06		Siglecg	-1.93705	2.91495	1.0438e-38	1.54736e-37
												Stpg2	-1.51911	2.67014	5.26229e-07	3.59954e-06		Megf6	1.93525	6.77161	1.19633e-94	6.43832e-93
												Nsun3	-1.51815	4.1623	4.47785e-29	1.20259e-27		Ndst4	1.93105	2.59799	1.16628e-27	1.29461e-26
												Slc4a10	-1.51808	2.82368	2.37925e-06	1.47435e-05		Abca9	1.93095	2.83258	3.68181e-23	3.53143e-22
												Slit1	-1.51619	1.30189	1.80004e-05	9.71373e-05		4930592A05Rik	-1.92916	2.07747	4.18253e-17	3.12526e-16
												Cib2	1.51232	1.39905	6.82829e-05	0.000333247		Gnrh1	-1.92515	2.40138	6.65706e-12	3.73222e-11
												Tfpi2	1.51232	0.880697	6.82829e-05	0.000333247		Vsig10l	-1.92358	2.00937	4.62247e-13	2.79185e-12
												Tmem223	-1.51121	1.90484	0.000389353	0.00161039		Col7a1	-1.92198	5.0318	1.70298e-101	1.07552e-99
												Glra1	-1.5099	1.18782	0.000654321	0.00257246		Fam13a	1.92161	2.75981	9.01404e-22	8.20758e-21
												Dock2	1.50799	2.70599	0.00356968	0.0115491		Syt9	-1.9205	1.03721	0.0050285	0.0105457
												Pzp	1.50799	0.364518	0.00356968	0.0115491		Gm13483	-1.91998	5.87512	2.28409e-128	3.0138e-126
												Trim15	-1.50451	2.31547	2.84245e-12	3.24105e-11		Vash1	1.91983	2.43707	1.53365e-16	1.11583e-15
																		Thsd1	-1.91724	4.39876	3.59155e-41	5.69664e-40
																		Diras2	-1.91709	0.106702	0.000752621	0.00182687
																		Slc2a2	-1.91533	1.35143	0.000116907	0.000323843
																		Pkp1	-1.91473	1.78629	4.64948e-05	0.000136736
																		Hist1h3d	-1.91425	0.575602	1.85753e-05	5.75785e-05
																		Fam150a	-1.91271	4.34526	5.81348e-95	3.1656e-93
																		4930593A02Rik	-1.91215	1.40757	5.42752e-09	2.47831e-08
																		AI607873	1.91184	1.17295	3.58939e-14	2.30906e-13
																		Cplx2	-1.91082	2.16541	2.98339e-18	2.34317e-17
																		9130008F23Rik	-1.9103	3.28805	6.31602e-34	8.24122e-33
																		Abcb1a	1.90397	1.14295	5.85953e-06	1.94395e-05
																		Grid1	1.90249	3.58225	8.81787e-38	1.26515e-36
																		Ccdc158	1.90241	0.521681	1.97309e-07	7.77487e-07
																		Sh2d5	1.90007	2.40251	5.06229e-43	8.43572e-42
																		Noct	-1.895	9.20471	3.23078e-194	1.54086e-191
																		Ramp1	1.89391	2.75438	8.42699e-34	1.0944e-32
																		Frrs1	-1.89348	5.44793	9.93842e-77	3.38567e-75
																		C030039L03Rik	-1.88933	2.73476	5.08357e-14	3.2466e-13
																		Iqcd	-1.88906	1.40759	3.12634e-07	1.2048e-06
																		St6gal1	1.88762	5.90274	4.11015e-133	6.17908e-131
																		Adra2a	-1.8876	1.37761	7.72442e-07	2.84367e-06
																		Ccr9	-1.88396	1.57196	4.74875e-06	1.59186e-05
																		Dnase1l3	-1.88166	0.117054	1.18247e-05	3.76749e-05
																		Bbox1	-1.8789	0.963962	2.95477e-05	8.9308e-05
																		Gpc5	1.87722	3.2613	9.4849e-43	1.57486e-41
																		Ildr2	1.87612	4.2928	2.02935e-59	4.61644e-58
																		Vsnl1	1.8753	2.70214	8.3643e-20	7.04976e-19
																		Fer1l5	-1.87515	2.12227	1.13825e-12	6.70204e-12
																		Eci3	1.87342	0.0534861	0.0032967	0.00716929
																		Egfem1	-1.87136	0.127429	0.000187004	0.000501153
																		Gpr85	-1.87136	0.537349	0.000187004	0.000501153
																		Kng2	-1.8713	1.56794	1.64223e-11	8.96357e-11
																		Efr3b	-1.86845	2.54899	5.08434e-14	3.2466e-13
																		A330093E20Rik	1.8666	1.50594	6.32752e-10	3.11888e-09
																		Gm14164	-1.86602	0.117102	0.000474655	0.00119341
																		Tnn	-1.86585	5.66377	2.9997e-13	1.83174e-12
																		Fam132a	-1.86157	2.93626	2.33171e-20	2.00684e-19
																		4933412O06Rik	1.85951	0.805407	3.49032e-10	1.75289e-09
																		Cdh26	-1.85895	2.44139	0.00121459	0.00284728
																		Grip1	-1.85619	7.36429	2.45857e-140	4.35955e-138
																		Ubb	-1.85472	2.40064	9.92365e-30	1.16416e-28
																		Abhd18	1.85367	4.1737	7.81027e-72	2.39521e-70
																		Sh3gl2	1.84476	1.0856	5.4659e-09	2.49419e-08
																		Musk	1.8438	0.158056	0.0017541	0.00401007
																		Ube2u	1.84156	0.264878	2.88132e-07	1.11504e-06
																		Gbx1	-1.84041	1.17811	7.71874e-07	2.84233e-06
																		Zfyve28	1.83757	4.21571	6.87036e-37	9.70622e-36
																		Galnt3	1.83687	3.16823	1.1757e-29	1.37806e-28
																		Tnfrsf18	-1.83559	2.35139	1.04217e-11	5.78191e-11
																		Rnf26	-1.83551	0.292633	3.2744e-08	1.39606e-07
																		Aim2	1.83371	0.670332	3.71571e-14	2.38699e-13
																		Pla2g7	1.83011	2.50827	1.95199e-13	1.20689e-12
																		Opcml	1.82768	5.63524	1.40632e-104	9.67701e-103
																		Itih4	-1.82601	0.457606	0.000297622	0.000773034
																		Cyb5d1	-1.8248	1.3019	8.47228e-09	3.80578e-08
																		Haglr	1.82189	0.905121	0.000935521	0.00223591
																		Stxbp6	-1.81705	5.08181	1.24253e-64	3.19432e-63
																		Apcdd1	1.81429	3.92922	5.36499e-24	5.33452e-23
																		Rsph6a	-1.81415	0.255567	0.000757916	0.00183908
																		Pak6	1.81369	0.40741	2.66151e-09	1.24911e-08
																		Edn1	1.81226	3.35307	2.13568e-45	3.76288e-44
																		Apobec4	-1.81112	0.0750388	0.0221494	0.0401558
																		Gm14403	1.80808	1.99177	9.91225e-36	1.35605e-34
																		2210406O10Rik	1.80592	0.992472	1.42161e-08	6.26585e-08
																		Cnnm1	1.80567	2.04003	2.5405e-06	8.7866e-06
																		Cadm2	-1.80461	6.7926	2.13167e-100	1.30457e-98
																		5830444B04Rik	-1.80442	1.5528	3.08706e-07	1.19099e-06
																		Col4a3	-1.80442	1.58694	3.08706e-07	1.19099e-06
																		4931408D14Rik	1.80055	1.06958	7.79368e-09	3.50665e-08
																		Gm1661	-1.79837	0.117122	0.00194775	0.00441628
																		Gm4532	-1.79837	0.106691	0.00194775	0.00441628
																		A730017L22Rik	-1.79833	3.94413	6.69911e-40	1.03065e-38
																		Tuft1	1.79263	5.84971	3.78072e-137	6.1519e-135
																		Brinp2	1.79234	0.246141	0.00555759	0.0115651
																		Tmem117	1.78945	5.17763	1.49575e-73	4.75579e-72
																		Gja3	-1.7891	0.432671	1.94764e-07	7.68114e-07
																		Adgrg1	1.78771	2.40993	4.2044e-12	2.38912e-11
																		Zfp874b	-1.78587	2.58107	4.6784e-19	3.79736e-18
																		Cobl	1.7856	7.18424	1.81641e-158	4.40751e-156
																		Ttll11	-1.78504	5.19798	3.13349e-75	1.03189e-73
																		Acvrl1	-1.78293	1.86234	6.38023e-12	3.58574e-11
																		Vwc2	-1.78181	1.31558	4.79595e-07	1.80448e-06
																		Ston2	1.78071	4.32231	1.5422e-48	2.85164e-47
																		Ppm1j	1.77981	3.44625	6.5649e-63	1.6014e-61
																		Slc35f1	1.77758	4.65947	1.63598e-52	3.30324e-51
																		Bst2	1.77469	1.23639	6.69937e-12	3.75391e-11
																		Tnfrsf23	-1.77316	2.23143	1.44087e-21	1.29998e-20
																		Dyrk3	1.77146	2.57897	5.6742e-31	6.8963e-30
																		Vat1l	-1.76514	2.87892	5.40071e-26	5.68039e-25
																		Trpm3	-1.76055	3.63029	1.61813e-12	9.41931e-12
																		Olfml2b	1.75825	5.46828	5.37412e-107	3.91208e-105
																		Zfp493	-1.75346	1.15301	7.24432e-06	2.37883e-05
																		Sdpr	1.75249	5.34401	2.93318e-111	2.4439e-109
																		Cyp7b1	1.74401	7.11801	6.16635e-114	5.3979e-112
																		Cyp2d22	1.74379	2.67596	4.80392e-16	3.42313e-15
																		Mir7652	-1.74343	0.0962388	0.0134173	0.0257047
																		Trim36	1.74302	2.91079	4.89035e-32	6.07167e-31
																		Gda	-1.74281	1.76643	1.19063e-07	4.80104e-07
																		Fbxo44	-1.74141	1.77274	4.08399e-13	2.47527e-12
																		Acer2	-1.73361	1.94961	2.9211e-07	1.12949e-06
																		Hsd3b5	1.73099	0.975364	1.55929e-09	7.45989e-09
																		Acot6	-1.7308	0.753093	0.000741711	0.00180192
																		Ostn	1.72694	1.34699	6.74136e-05	0.000193484
																		Syk	-1.7268	3.53578	9.2729e-24	9.1479e-23
																		Ftl1	-1.72677	5.5266	6.74425e-100	4.07335e-98
																		Jph3	-1.72669	1.85918	2.22297e-11	1.19914e-10
																		0610040B10Rik	-1.72636	1.54517	4.48303e-05	0.000132291
																		Hoxd3os1	1.7238	3.35846	2.228e-13	1.37202e-12
																		Als2cr12	1.72312	0.390461	3.63011e-05	0.000108582
																		Plppr4	1.72011	2.17065	2.32209e-11	1.24823e-10
																		E2f8	-1.71864	3.04381	3.37146e-23	3.24049e-22
																		Rragd	-1.71538	2.84053	5.04928e-17	3.76275e-16
																		Zfp946	1.71409	4.20042	6.15992e-66	1.63527e-64
																		Slfn5os	1.71356	0.106713	0.0179972	0.0333985
																		Eps8l3	-1.71278	1.13765	1.14589e-07	4.62605e-07
																		Gm7694	1.71219	0.521667	3.10273e-06	1.06354e-05
																		Neto1	1.70841	0.398979	9.14118e-07	3.33769e-06
																		Smc1b	-1.70785	2.23424	8.209e-11	4.31378e-10
																		Slain1	1.70532	0.355619	2.70385e-07	1.05136e-06
																		D330050G23Rik	-1.70445	1.12753	0.00189749	0.00431081
																		Mmp12	1.70439	0.759494	6.0521e-12	3.40686e-11
																		Mmd	1.70248	5.68934	1.24275e-118	1.22774e-116
																		Popdc3	1.70153	0.552833	0.00483259	0.0101673
																		Zfp93	-1.70091	2.28829	1.98856e-10	1.01576e-09
																		Mmp3	-1.69964	1.74995	0.00810979	0.0163246
																		Zfp937	1.69669	2.96312	4.14042e-45	7.22145e-44
																		Zfp85	-1.69611	0.952355	1.72987e-05	5.38387e-05
																		2310005E17Rik	1.69549	1.23147	2.34303e-16	1.69667e-15
																		Col9a2	1.69121	1.8055	2.86634e-12	1.64295e-11
																		Ccdc116	-1.69074	0.481856	6.87297e-07	2.539e-06
																		Kank4os	1.68996	0.545078	0.000201973	0.000538763
																		Cerkl	-1.6849	1.79274	1.09496e-07	4.42429e-07
																		Tbc1d21	1.68344	0.513793	7.87164e-07	2.89401e-06
																		Pnpla3	1.68306	0.898996	4.27875e-07	1.61958e-06
																		C4bp-ps1	1.68271	0.928868	2.32791e-07	9.10817e-07
																		Spata24	-1.68193	2.54138	1.89579e-10	9.70774e-10
																		Pamr1	1.68187	4.51132	1.09179e-45	1.93102e-44
																		Odf3	1.68092	0.766226	3.35267e-09	1.55763e-08
																		Pcdh15	-1.67851	2.17046	1.31451e-12	7.68105e-12
																		Acsm3	1.6773	2.69151	1.98519e-22	1.85647e-21
																		Grip1os2	-1.67688	1.99828	2.83147e-09	1.32438e-08
																		Adora2b	-1.6756	3.9535	1.62121e-40	2.53653e-39
																		Cfap43	-1.67433	1.9839	8.25672e-13	4.90334e-12
																		Anxa8	-1.67381	3.80356	1.76825e-24	1.78256e-23
																		9330175M20Rik	1.67368	5.46939	8.92135e-111	7.36801e-109
																		6820408C15Rik	-1.67285	1.39054	6.67004e-06	2.1986e-05
																		4833412C05Rik	-1.67103	1.62382	1.77241e-09	8.45026e-09
																		Chn1os3	-1.66655	1.63853	2.65763e-05	8.08749e-05
																		Nipal4	-1.66624	4.19492	1.3001e-50	2.52908e-49
																		Lrriq1	1.66606	1.35125	2.58195e-10	1.30666e-09
																		Cklf	-1.66491	3.91654	5.73682e-29	6.57926e-28
																		Dok6	-1.66459	5.17763	3.88834e-93	2.0067e-91
																		Rgs9	1.66411	0.824595	9.62979e-09	4.30895e-08
																		Piwil2	-1.66313	0.99248	4.14182e-06	1.39789e-05
																		Plch1	1.66198	1.53701	7.05253e-17	5.21623e-16
																		Ppp1r3c	-1.66183	1.40343	0.000710506	0.00173255
																		4930429B21Rik	-1.65754	1.79584	1.6658e-08	7.29335e-08
																		Cntn3	1.65701	1.27901	7.80987e-06	2.55665e-05
																		Frk	-1.65632	6.33413	1.65251e-102	1.07811e-100
																		Gm32014	-1.65592	1.63856	1.6453e-05	5.13799e-05
																		4930405A21Rik	1.65589	1.26503	1.44534e-05	4.54123e-05
																		Col25a1	1.65479	6.04866	9.31348e-80	3.42592e-78
																		Tspan13	1.65462	1.23188	2.67925e-05	8.14971e-05
																		Malt1	1.64774	4.79133	1.62588e-89	7.54616e-88
																		Fut9	-1.64649	1.84075	6.59087e-05	0.000189636
																		Tmod4	-1.64602	0.432869	0.0216223	0.0393602
																		Ttyh1	1.64476	2.17813	5.14494e-12	2.90804e-11
																		Prkar1b	-1.64462	4.03689	1.97364e-55	4.19316e-54
																		4930532I03Rik	1.64453	0.329102	0.000606732	0.00149825
																		Gfra2	1.6412	1.54529	0.00114337	0.00269265
																		Tacr1	1.63757	1.81512	6.292e-10	3.10249e-09
																		Stk31	1.63705	0.364508	0.00216493	0.00486484
																		E230029C05Rik	-1.63638	0.958178	4.0664e-05	0.000120795
																		Zfp770	1.63627	3.55168	5.62012e-34	7.36796e-33
																		1700024P16Rik	1.63483	2.4553	4.296e-21	3.80407e-20
																		Tas1r1	1.63311	1.69851	7.99648e-12	4.46685e-11
																		Mob3b	1.63114	4.66558	5.85684e-70	1.7126e-68
																		Prmt9	1.63096	5.46855	3.43162e-101	2.13796e-99
																		Folr2	-1.63069	1.36887	3.91085e-06	1.32511e-05
																		Tlr3	-1.62886	0.117091	0.00180511	0.00411715
																		Lmntd2	-1.62886	0.117101	0.00180511	0.00411715
																		Cpne4	1.62861	0.29274	1.23116e-05	3.91361e-05
																		Plxna4	-1.62294	6.38452	2.28601e-124	2.63482e-122
																		Dcst1	-1.62281	1.49014	0.000163902	0.000443626
																		Cenpv	1.62136	2.16813	1.24042e-11	6.82971e-11
																		Xirp1	1.61947	0.792519	4.89998e-07	1.84212e-06
																		Lyve1	1.61692	0.283467	9.0142e-07	3.29568e-06
																		Rgs22	1.61691	0.489927	9.0142e-07	3.29568e-06
																		Hlf	1.61506	1.46603	0.0153347	0.0289627
																		Cftr	-1.61501	1.98153	0.00109831	0.00259406
																		Ccdc141	-1.61438	5.50915	2.30209e-67	6.31751e-66
																		Slc25a45	1.61431	0.41602	0.000146722	0.000400101
																		Htr5b	1.61431	0.147888	0.000146722	0.000400101
																		Csrnp3	1.61396	2.24613	3.18148e-12	1.81981e-11
																		S1pr3	-1.61195	5.94719	3.8127e-69	1.09861e-67
																		Gm6548	-1.61172	1.09078	9.20153e-09	4.12132e-08
																		Rhd	1.61044	1.38178	8.31695e-10	4.06616e-09
																		Stk10	1.61043	6.51764	1.74413e-120	1.82751e-118
																		Gpr39	-1.60914	6.28662	2.43441e-108	1.87057e-106
																		Pxylp1	-1.60693	3.67417	3.50764e-23	3.36904e-22
																		Fgd5	-1.60556	0.843621	6.19586e-05	0.000179053
																		Rgs20	1.60387	3.18079	2.18667e-23	2.11792e-22
																		Adam21	-1.60376	0.0534093	0.000669553	0.00164049
																		Commd6	1.60331	3.84077	2.22183e-48	4.08645e-47
																		Col20a1	-1.6029	5.31361	2.78846e-71	8.40244e-70
																		4930590J08Rik	-1.60257	2.08317	3.59175e-07	1.37497e-06
																		Galr2	1.60196	1.26491	9.27573e-09	4.15321e-08
																		Ccdc81	1.59948	0.560258	1.69717e-08	7.42601e-08
																		Wnt16	-1.59932	3.64423	3.49315e-35	4.72738e-34
																		4930552P12Rik	-1.59857	1.02608	3.81476e-05	0.000113834
																		Npy1r	-1.59857	0.886881	3.81476e-05	0.000113834
																		Itih5	-1.59857	2.39934	3.81476e-05	0.000113834
																		Slc7a15	-1.59857	0.39041	3.81476e-05	0.000113834
																		2610507I01Rik	-1.59829	1.12214	2.23028e-07	8.74349e-07
																		Fras1	-1.59627	7.04806	3.08798e-124	3.5008e-122
																		BC051019	1.59487	0.837392	3.58234e-05	0.000107199
																		Ggnbp2os	1.59487	0.799083	3.58234e-05	0.000107199
																		Sema3e	-1.59464	8.06205	5.14917e-155	1.18697e-152
																		Col6a3	-1.59251	10.0174	5.39175e-129	7.38349e-127
																		B430212C06Rik	-1.59241	0.969698	2.35077e-05	7.19643e-05
																		Cpsf4l	-1.59212	3.14798	9.34929e-16	6.56396e-15
																		Lrrc17	-1.59151	6.64628	2.8135e-99	1.6773e-97
																		Stkld1	-1.58964	2.30875	2.1389e-11	1.15469e-10
																		Cd59a	1.58839	4.61981	1.18455e-83	4.80454e-82
																		Acrv1	-1.58658	0.311008	0.000250121	0.000657061
																		Il31ra	-1.58572	1.6277	0.00462403	0.00976263
																		Sh2d3c	-1.58421	2.20503	2.15139e-14	1.39765e-13
																		Matn3	1.58329	1.92301	8.33262e-11	4.37542e-10
																		Samhd1	-1.58023	4.68665	2.72345e-49	5.15294e-48
																		Pter	-1.57949	5.45167	6.96522e-74	2.22485e-72
																		Alox5	1.57779	2.69836	8.10885e-24	8.03392e-23
																		Dcc	-1.57747	6.26888	1.49411e-107	1.12923e-105
																		Slc35f2	1.57614	0.824778	0.000231146	0.000610227
																		Trpv6	1.57614	0.407564	0.000231146	0.000610227
																		Rasgef1a	-1.57505	0.373233	0.00278867	0.00615545
																		Acss1	-1.57505	1.6953	0.00278867	0.00615545
																		Nme5	-1.57407	0.739624	9.39948e-05	0.000263968
																		Zfp783	-1.57303	2.73271	5.0712e-16	3.60987e-15
																		Zbed3	-1.57147	5.0102	3.83595e-40	5.94787e-39
																		Acan	1.57083	4.08647	1.28194e-10	6.65808e-10
																		Rasl11b	-1.57033	3.53666	2.08208e-36	2.90588e-35
																		Gsto2	-1.57018	3.09249	1.21441e-13	7.57963e-13
																		Sh3gl3	1.56806	1.55282	2.96176e-07	1.14457e-06
																		Piezo2	-1.56726	10.0264	6.14776e-238	5.00175e-235
																		4933421O10Rik	-1.56683	3.48841	1.20135e-15	8.36649e-15
																		Gm11837	1.56627	0.505895	4.02264e-06	1.36032e-05
																		Gm5595	-1.56251	4.18177	1.85672e-38	2.72904e-37
																		Ankrd23	-1.56054	3.36034	7.22955e-17	5.33575e-16
																		Kctd12	-1.55958	4.58679	3.55105e-30	4.22309e-29
																		Igfbp5	-1.5585	7.8914	4.62467e-99	2.71033e-97
																		Oas1b	1.558	2.54509	4.21401e-14	2.69958e-13
																		Btc	1.5545	1.36457	1.37016e-05	4.31678e-05
																		Atp10d	1.55349	4.51045	2.5598e-74	8.19551e-73
																		4930452B06Rik	1.55145	4.37294	1.43976e-59	3.28061e-58
																		Nfatc2ip	1.55106	2.08805	7.1102e-16	5.02253e-15
																		Prob1	-1.54941	1.02614	0.000379773	0.00097181
																		Sgip1	1.54803	6.73285	8.55097e-95	4.61986e-93
																		Add2	1.54703	0.705558	0.000193846	0.000518284
																		Map7	-1.54434	3.24595	1.56533e-23	1.52037e-22
																		Slc6a7	1.54367	1.42879	0.0128255	0.024713
																		Zfp940	1.54345	1.91995	1.07088e-11	5.93641e-11
																		Col28a1	-1.54336	3.44815	6.86855e-09	3.10556e-08
																		Stom	-1.54326	3.12837	3.94029e-26	4.17291e-25
																		Fam189a1	1.54308	3.59474	1.22754e-23	1.20157e-22
																		Krt80	-1.54188	0.61286	0.000141955	0.00038775
																		Psrc1	-1.54126	4.13544	1.15933e-42	1.92033e-41
																		Rims2	1.54042	5.37039	1.3334e-90	6.3594e-89
																		Rbm43	1.54019	2.09594	7.1452e-17	5.28195e-16
																		Zfp944	1.54	5.52291	2.80089e-97	1.60079e-95
																		Nyap1	-1.53996	2.29276	9.8667e-12	5.48719e-11
																		Tmem181a	-1.53933	2.68507	1.05332e-39	1.61156e-38
																		Cwc22	1.53917	1.54064	1.36838e-20	1.18436e-19
																		Apba2	1.53904	1.18793	2.09147e-07	8.22259e-07
																		Myrf	1.53887	3.55981	1.03368e-42	1.71425e-41
																		Arhgap33	-1.53682	1.94074	1.78013e-07	7.05674e-07
																		3110035E14Rik	-1.53536	1.04242	1.10392e-07	4.45921e-07
																		St18	-1.53473	1.87123	1.40457e-15	9.71813e-15
																		Siva1	-1.53413	2.91092	8.7848e-16	6.18019e-15
																		5033403F01Rik	-1.53283	0.560477	0.0202306	0.0370895
																		Lrrc4c	-1.53255	4.74956	2.77103e-62	6.68868e-61
																		Nlrc4	-1.5317	1.39054	2.01806e-05	6.22197e-05
																		C430002N11Rik	-1.52986	2.48998	1.45816e-11	7.99676e-11
																		Pax8	1.52815	1.35134	7.02562e-07	2.5947e-06
																		Pak7	-1.52744	2.59424	2.06935e-15	1.4197e-14
																		Tinagl1	-1.5273	3.61766	1.8863e-40	2.94463e-39
																		Zmynd15	1.52718	0.0748905	2.12017e-05	6.52806e-05
																		Sowahc	1.52665	1.77609	1.92378e-12	1.1147e-11
																		Cpxm2	-1.52565	4.95507	1.52354e-09	7.29136e-09
																		Gm6277	1.5251	1.03168	0.000678012	0.00165916
																		Cpa4	1.5251	1.32919	0.000678012	0.00165916
																		Grik1	-1.525	6.44495	1.35709e-95	7.47807e-94
																		Crybg3	-1.52324	5.97568	1.38672e-94	7.40528e-93
																		Esr2	1.52266	2.14538	8.89689e-13	5.27445e-12
																		Dok2	1.52124	0.207582	0.000161879	0.000438579
																		Tnfsf18	1.52025	0.670493	3.20736e-07	1.23465e-06
																		Gstm2	-1.51961	1.85927	2.64373e-07	1.02943e-06
																		Terb1	1.51743	3.1179	2.61532e-32	3.28245e-31
																		Jph1	-1.51734	5.9061	1.38715e-88	6.31108e-87
																		Sgk1	-1.51648	5.84318	2.10515e-89	9.71303e-88
																		Pglyrp1	1.51425	1.44938	5.87432e-07	2.18702e-06
																		Fgf14	1.51366	4.99862	1.59857e-77	5.56924e-76
																		A630001G21Rik	1.51337	0.874566	1.46541e-07	5.86291e-07
																		Tmem141	1.51312	1.251	0.00552499	0.0115024
																		1700030J22Rik	1.50906	0.364443	7.26104e-05	0.000207067
																		Olfm3	-1.50895	1.05889	0.000213386	0.000566368
																		Ctsc	1.50811	5.94157	7.6229e-103	5.02059e-101
																		Spta1	-1.50803	1.58327	0.000130518	0.000358601
																		Tfpi2	1.50731	0.880697	6.70049e-08	2.77386e-07
																		Gabrb1	-1.50709	5.5495	3.40103e-108	2.5846e-106
																		Cntfr	-1.5069	2.23839	2.19758e-21	1.96857e-20
																		Cadps2	1.50624	2.0748	4.82536e-15	3.24767e-14
																		Elavl4	1.50197	2.84622	1.39921e-29	1.63727e-28
																		Prodh	-1.50123	2.2319	5.77873e-08	2.41176e-07
																		Eppk1	-1.5005	1.59425	8.58839e-09	3.85544e-08
																		Prrt3	1.50013	0.407478	7.99873e-06	2.61476e-05

## Sheet: B6xMOLF
Gene	log2 (wild/B6 counts)	log2 (CPM)	p-value	FDR
Igf2	14.0963	6.66601	2.85154e-189	2.19109e-186
H19	-12.4548	7.44091	7.54401e-212	8.02625e-209
Peg3os	11.6168	4.76143	1.10422e-111	2.58856e-109
Meg3	-11.4854	10.0649	2.53983e-275	1.17095e-271
Sgce	10.6988	5.58721	8.91997e-89	1.08221e-86
Mirg	-10.0487	8.15202	1.06159e-222	1.33481e-219
Peg3	9.84876	8.18704	1.05497e-219	1.21595e-216
Rian	-9.63626	11.105	0	0
Mas1	9.55835	2.13799	6.14158e-53	2.749e-51
Mir667	-9.55126	2.17814	6.55896e-52	2.86173e-50
Mir1197	-9.34184	1.93481	3.97771e-45	1.52821e-43
Slc22a27	-9.24036	2.215	3.54993e-42	1.29208e-40
Mir758	-9.19768	2.31088	5.37977e-41	1.91279e-39
Kcnq1ot1	9.16565	9.12102	5.13835e-243	1.12526e-239
Mir3070a	-9.03751	2.02589	7.3158e-37	2.34224e-35
Mir654	-9.0131	1.96394	2.85093e-36	8.98205e-35
Mir376c	-8.91113	1.8747	6.58455e-34	1.96113e-32
Mir540	-8.88446	1.59075	2.56793e-33	7.57293e-32
Mir666	-8.8573	2.01776	1.00165e-32	2.89223e-31
Mir323	-8.72831	1.84987	4.58982e-30	1.22316e-28
Mir382	-8.68262	1.11202	3.54176e-29	9.08834e-28
Slc22a1	-8.68262	2.02853	3.54176e-29	9.08834e-28
Fgl2	-8.53615	2.96153	1.63255e-26	3.8532e-25
Snhg14	8.36442	1.79251	4.67952e-24	1.00814e-22
Kcnq1	8.18169	9.13426	2.07079e-242	3.58013e-239
Lrrc72	8.1494	0.188033	6.14455e-21	1.16578e-19
Rtl1	-7.91277	6.1642	1.74754e-151	8.95194e-149
Ndn	7.84028	1.00378	3.45024e-17	5.4914e-16
Mir376a	-7.79033	0.506004	2.01174e-16	3.09503e-15
Clca1	7.7564	1.22249	4.40548e-67	2.76965e-65
4930539N22Rik	-7.60679	1.84946	1.23533e-14	1.69839e-13
Gm20756	-7.5738	2.35063	2.45562e-14	3.30065e-13
Dedd	7.51992	4.66256	4.69195e-14	6.19221e-13
Grb10	-7.38706	10.4177	1.53037e-106	3.0238e-104
Mir299a	-7.31893	0.346919	3.03545e-12	3.51325e-11
Olfr1314	-7.27855	1.08575	6.04858e-12	6.84039e-11
Mir434	-7.27855	0.855995	6.04858e-12	6.84039e-11
Inpp5d	7.19996	1.81144	1.539e-11	1.69474e-10
Igf2os	7.17486	2.44522	2.0589e-52	9.12714e-51
Mir543	-7.15013	0.656394	4.79698e-11	5.09186e-10
6430411K18Rik	-7.08406	3.62785	7.91088e-87	9.11794e-85
Mest	7.06588	6.78451	1.26336e-191	1.02786e-188
Zim1	-7.04524	6.05749	3.02454e-145	1.4425e-142
4930563M21Rik	-7.00917	0.590614	3.81985e-10	3.72583e-09
Cdkn1c	-7.00916	1.81178	3.81985e-10	3.72583e-09
Mir882	-6.95894	0.490014	7.63586e-10	7.22378e-09
Fam135b	-6.79683	0.117183	6.12187e-09	5.33533e-08
Apobr	-6.67774	1.68459	1.45376e-37	4.73104e-36
A330076H08Rik	6.66477	3.59909	1.84569e-61	1.02934e-59
Gm4349	6.66384	0.473854	2.24503e-08	1.83625e-07
Mir296	6.5974	0.246143	4.67087e-08	3.68948e-07
Mir493	-6.54776	1.34673	9.92654e-08	7.4983e-07
Ralyl	-6.49937	5.18249	1.84084e-107	3.74422e-105
A230057D06Rik	6.48528	5.51914	2.7632e-75	2.33036e-73
Mir300	-6.40499	0.811906	4.02019e-07	2.83835e-06
Ccdc7b	-6.32794	0.575474	8.10474e-07	5.49224e-06
Skint6	6.29605	1.88027	8.85023e-07	5.95657e-06
Mill2	-6.2935	3.03324	1.1255e-50	4.81946e-49
Mir665	-6.24653	0.217369	1.63613e-06	1.06091e-05
Epc2	6.20973	6.90727	1.8528e-06	1.19191e-05
Nrros	-6.06849	0.167984	6.69897e-06	3.97654e-05
Mir494	-5.97049	0.415915	1.35923e-05	7.67327e-05
Asb4	-5.97049	0.590572	1.35923e-05	7.67327e-05
Plagl1	5.95613	7.81738	6.08715e-208	5.61276e-205
Lrrc3b	-5.95357	2.74857	1.07186e-22	2.20937e-21
Peg12	5.91467	0.15802	1.71893e-05	9.54031e-05
Mir329	-5.86534	0.346915	2.76387e-05	0.000148628
Klhl6	-5.75193	0.590405	5.63401e-05	0.000287682
Atp6v0c-ps2	-5.75193	0.40747	5.63401e-05	0.000287682
Gpr137b-ps	-5.62883	2.50484	0.000115178	0.000553325
Olfr1033	-5.49424	1.30602	0.000236258	0.00106128
Mir3070b	-5.49424	1.31077	0.000236258	0.00106128
Slc10a6	5.39474	0.56049	0.000348041	0.00150618
Dlk1	5.31168	4.26194	1.75926e-68	1.17547e-66
Wls	5.2291	7.74077	0.000746009	0.00296922
Dxo	5.2291	0.849697	0.000746009	0.00296922
Rrm2	-5.18029	2.88369	0.00100704	0.00387933
Myo7a	-5.1677	6.35655	6.742e-160	3.58649e-157
Thsd7b	5.1122	4.37553	2.32831e-134	9.47141e-132
Usp29	5.09769	3.55757	3.58934e-74	2.9727e-72
Krt8	4.82682	0.187956	0.0034968	0.0117161
Stom	-4.77845	3.12837	0.00439991	0.0142886
4930412C18Rik	-4.77845	0.649149	0.00439991	0.0142886
9030624G23Rik	-4.77845	0.13751	0.00439991	0.0142886
Gja3	-4.71825	0.432671	1.17617e-09	1.10065e-08
Afap1l1	-4.62869	0.85608	4.42323e-09	3.90413e-08
Zfp783	-4.59966	2.73271	2.812e-44	1.06555e-42
Gm15217	4.57392	0.157968	0.00767897	0.0231117
Chmp2a	-4.52589	2.8757	0.00932703	0.0275058
Ssbp4	-4.52589	2.79524	0.00932703	0.0275058
Lhx6	-4.52589	0.612633	0.00932703	0.0275058
Psma8	4.52551	1.55313	2.87712e-65	1.75302e-63
Zdbf2	4.44955	4.58732	3.11802e-110	6.73833e-108
A630001G21Rik	-4.43093	0.874566	6.22424e-08	4.85e-07
Ccdc178	4.40283	1.09639	3.06995e-32	8.70092e-31
Mir673	-4.33049	1.35567	3.47771e-12	4.00203e-11
Slc2a2	-4.28612	1.35143	6.69894e-21	1.26922e-19
Dnah8	4.26927	1.63131	1.08688e-37	3.56225e-36
Lyn	4.26706	5.30613	0.0171058	0.0459488
Strada	4.26706	4.34342	0.0171058	0.0459488
Cpsf3	4.26706	4.17882	0.0171058	0.0459488
Gm6583	4.26706	0.83734	0.0171058	0.0459488
1700025K24Rik	4.26706	0.663438	0.0171058	0.0459488
Tmem30c	-4.2017	0.0534331	8.68581e-07	5.85446e-06
Rhag	-4.2017	0.147848	8.68581e-07	5.85446e-06
Pnp2	4.15136	0.381861	1.65679e-10	1.67508e-09
Klk9	-4.07179	0.390354	3.23191e-06	2.01082e-05
Scn7a	-4.04971	2.88215	1.65515e-39	5.69464e-38
Sfi1	4.01964	4.42605	6.22654e-06	3.71364e-05
Gpr149	-3.99944	2.70697	6.95442e-38	2.29562e-36
Trp53cor1	-3.98611	3.83833	8.03253e-83	8.41651e-81
Gm3363	-3.91355	1.37744	2.83693e-12	3.29175e-11
Mreg	-3.85197	0.381837	2.30524e-05	0.000125626
Snph	3.84556	3.31522	1.09882e-80	1.07121e-78
Stmn2	-3.76455	0.246115	5.1499e-08	4.05628e-07
Dhdh	3.73502	0.399121	5.31962e-16	8.00606e-15
Kcnc2	3.70725	4.43711	7.47101e-122	2.24634e-119
Trpc4	3.6673	2.62332	2.04687e-25	4.62586e-24
1700016C15Rik	3.59807	2.59847	4.64849e-68	3.04708e-66
Ager	-3.59252	0.521639	0.00016286	0.000758936
Rnaset2b	3.58493	0.855884	0.000192479	0.00088064
Fam110c	-3.51967	0.71922	5.05362e-09	4.4407e-08
Impact	3.51092	7.33658	1.87115e-170	1.23238e-167
Slc38a4	3.50084	5.945	1.8805e-124	6.19265e-122
Hist1h2bm	-3.49452	0.117131	0.000311661	0.00136411
Gm10548	-3.48143	1.59038	9.35548e-09	7.98246e-08
1700042O10Rik	3.47972	0.83102	0.000380677	0.00162756
Ppp1r1a	3.47972	0.117087	0.000380677	0.00162756
Mannr	-3.43487	1.86868	3.24093e-21	6.22574e-20
4933402J07Rik	3.42333	2.41246	6.16398e-41	2.186e-39
Cdh26	-3.39233	2.44139	1.94628e-20	3.65251e-19
Ecel1	3.39094	1.74977	5.12317e-16	7.72721e-15
Efcab7	-3.34152	3.36416	4.64361e-33	1.34928e-31
Crmp1	-3.32642	3.51263	2.10379e-36	6.64327e-35
Trim12a	-3.31822	2.06624	1.91158e-13	2.41673e-12
A730017L22Rik	-3.30431	3.94413	6.46802e-64	3.87269e-62
Airn	3.29331	10.0431	4.80824e-257	1.33005e-253
Adamts19	3.25575	1.43284	9.78644e-11	1.0139e-09
Abca16	3.24305	1.07468	0.00148041	0.00548794
Il18r1	3.22465	1.9528	3.68831e-12	4.22993e-11
Rpl39l	-3.20765	0.106761	2.66802e-05	0.00014409
Guca1b	-3.20297	1.15295	9.45408e-09	8.05665e-08
Loxhd1	3.18855	0.053528	1.7236e-08	1.42835e-07
Eps8l3	-3.16665	1.13765	1.71643e-08	1.42325e-07
Cntnap4	-3.16665	2.04545	1.71643e-08	1.42325e-07
Slc15a2	-3.1547	0.583235	3.76148e-18	6.25301e-17
Bcl2l15	-3.13804	0.197817	4.92908e-05	0.000254381
Tfap2e	-3.13804	0.137702	4.92908e-05	0.000254381
L3mbtl1	-3.13804	0.31101	4.92908e-05	0.000254381
Cd38	3.13281	3.6737	1.4718e-76	1.28028e-74
1700027I24Rik	-3.13238	0.739559	1.21413e-06	8.0156e-06
2700054A10Rik	-3.1294	1.39465	3.11044e-08	2.50264e-07
Ovgp1	-3.10311	0.940663	1.05156e-12	1.26142e-11
Sfrp4	3.09641	0.934993	2.33325e-15	3.37919e-14
Aph1c	3.09624	2.60956	3.09007e-55	1.48399e-53
Flt4	3.09607	4.66018	5.87181e-97	9.33482e-95
Skap1	-3.0946	3.24908	1.05831e-18	1.83088e-17
Gm15987	-3.08216	0.074979	2.21023e-06	1.4068e-05
Kcnip4	3.07495	9.26284	1.41189e-236	2.16977e-233
Gfap	3.07257	0.23666	3.15377e-06	1.96663e-05
Rrp9	-3.06489	3.04883	9.08136e-05	0.000444932
Ipcef1	3.0328	0.373266	2.74097e-10	2.71564e-09
Gm5893	3.01647	0.529491	5.89572e-06	3.52393e-05
Asb2	3.00108	1.2411	0.000175186	0.000809825
Cyp4f37	3.00108	1.17785	0.000175186	0.000809825
Gm12709	2.98042	1.35141	3.83574e-07	2.71923e-06
4932702P03Rik	-2.97613	0.568044	7.26933e-06	4.29851e-05
Nptx2	-2.9635	2.05871	7.13508e-10	6.79651e-09
Siah3	2.9581	0.127472	1.09882e-05	6.28651e-05
Lrfn5	2.9577	0.482018	2.53275e-08	2.0594e-07
Grin2a	2.92794	1.28831	3.61059e-18	6.00939e-17
Cntn4	2.92337	2.74013	4.69323e-23	9.77591e-22
Pkp1	-2.92092	1.78629	7.41304e-30	1.95667e-28
Trim30d	-2.92005	2.13979	1.3129e-05	7.43295e-05
Slc22a18	-2.91008	2.02061	5.0159e-22	1.00253e-20
Elfn1	-2.90874	4.31393	3.54334e-70	2.53927e-68
A330008L17Rik	-2.90642	0.274275	0.000305417	0.00134187
Xkr5	-2.90488	1.13256	2.25276e-09	2.04583e-08
Pld5	-2.88754	3.88366	1.50073e-32	4.29744e-31
Frmpd1	2.88219	0.473992	8.50331e-08	6.47629e-07
Tbc1d21	-2.8617	0.513793	2.36407e-05	0.000128477
Trim6	-2.82015	0.691517	0.000557155	0.00228665
Tex2	2.79415	5.17567	0.0111339	0.0320077
Spx	-2.75031	1.16303	2.19458e-11	2.39002e-10
Aldh1a7	-2.73739	0.649048	7.58929e-05	0.000376768
Oprm1	2.71633	0.642066	8.66244e-10	8.15591e-09
Hmha1	2.71427	2.42681	1.05938e-24	2.35946e-23
Rsph3b	-2.70432	0.946288	0.0146592	0.0403727
Tyro3	-2.70432	2.86786	0.0146592	0.0403727
Psrc1	-2.70336	4.13544	1.80337e-72	1.40126e-70
Ppp1r36	2.69767	0.127409	0.000127992	0.000608128
9430041J12Rik	2.69767	0.178102	0.000127992	0.000608128
Cpsf4l	-2.68493	3.14798	1.81957e-28	4.57573e-27
Mir6346	2.68312	0.0534972	1.44979e-05	8.138e-05
Cftr	2.68071	1.98153	8.98279e-26	2.07414e-24
2500002B13Rik	-2.67098	0.59056	0.000135233	0.000640333
Lbp	2.66763	1.34721	3.02741e-28	7.55815e-27
B3gnt5	-2.65547	4.15017	2.94238e-34	8.84697e-33
Moxd1	2.64899	4.54972	6.61097e-112	1.57649e-109
Adtrp	-2.63984	0.168021	1.84494e-05	0.000102029
Tuba8	-2.6203	0.399019	2.55553e-06	1.61248e-05
Vwf	2.6197	0.355585	0.00216839	0.00774561
Scn8a	2.61698	0.905153	3.304e-15	4.74535e-14
Sema7a	-2.61331	5.85265	2.00288e-110	4.39712e-108
Cyp2d22	2.6009	2.67596	5.8103e-15	8.1669e-14
St8sia4	2.59034	0.560437	6.25982e-07	4.31818e-06
Dsc2	2.59034	0.320113	6.25982e-07	4.31818e-06
Hist1h2ad	-2.58967	0.28358	7.19357e-09	6.2145e-08
Mcoln2	2.57943	2.0481	3.2865e-17	5.24286e-16
C130046K22Rik	-2.56963	2.0065	6.20836e-07	4.28696e-06
Stag3	-2.56916	1.64554	4.46898e-13	5.50895e-12
Gm3604	-2.55129	1.6419	7.63808e-13	9.26687e-12
Ddc	2.54995	2.9964	1.11332e-06	7.39238e-06
Pou1f1	2.54024	0.537375	2.7259e-08	2.20479e-07
Aox2	-2.52821	0.0643161	0.000424029	0.00179405
Pik3cb	-2.52524	5.26533	0.00329549	0.0111171
Tlr3	-2.52524	0.117091	0.00329549	0.0111171
4930471L23Rik	-2.52524	0.381803	0.00329549	0.0111171
Srcin1	2.52057	0.63491	1.44168e-10	1.47157e-09
Misp	2.50898	1.35143	3.04532e-11	3.29062e-10
Hcn4	2.50782	0.407577	8.48638e-05	0.000419197
Rbm44	2.50621	0.147864	0.00401539	0.0132231
Rasgef1c	2.50621	0.283553	0.00401539	0.0132231
Pitpnm3	2.49817	2.4884	4.98202e-29	1.27131e-27
4930481A15Rik	-2.47271	1.29273	4.4411e-11	4.72863e-10
Sox5os3	-2.47142	1.10127	9.86327e-05	0.000480517
Nespas	2.46683	5.2903	1.60141e-90	2.03203e-88
Ntf3	-2.45924	3.74355	2.92787e-29	7.58341e-28
Vwa3a	-2.45115	0.292717	0.000745586	0.00296922
Hlf	2.44749	1.46603	8.70571e-13	1.05069e-11
Entpd2	2.4443	0.473988	0.000151565	0.000709889
Gm6093	2.44312	0.691784	1.608e-10	1.62765e-09
Clec1a	2.43586	0.732959	3.05902e-08	2.46702e-07
B230217O12Rik	-2.42569	1.6915	1.59826e-13	2.0355e-12
1700061I17Rik	-2.42403	0.928889	2.56679e-08	2.08341e-07
Sod3	2.41832	2.62818	4.67459e-54	2.16961e-52
4933431E20Rik	-2.41822	2.10926	1.09913e-12	1.31733e-11
Gsta3	2.41544	1.66003	6.45887e-16	9.66803e-15
Dapk2	-2.41061	1.1376	0.000171029	0.000793792
Nova2	-2.41018	0.998191	5.4466e-06	3.27388e-05
Vat1l	-2.40952	2.87892	1.24928e-17	2.03759e-16
Gpr61	2.38303	0.117102	0.00738717	0.0223571
Car15	-2.37963	1.7158	8.81002e-11	9.16865e-10
Eci3	2.37787	0.0534861	0.000269315	0.00119618
St6galnac3	2.37787	5.80618	0.000269315	0.00119618
Cmah	-2.3777	1.71226	3.07576e-07	2.20762e-06
Slc35f2	2.37427	0.824778	3.98487e-09	3.53753e-08
Kcnk12	-2.35757	1.92575	1.76523e-08	1.46022e-07
Slc6a17	-2.35626	5.19722	5.47897e-69	3.75147e-67
Lin28b	-2.34712	0.739421	0.000295174	0.00130018
Ttc23l	2.34705	4.09635	1.54234e-68	1.03554e-66
Rgl3	-2.3447	0.837306	5.20216e-07	3.63022e-06
Mogat2	2.34319	0.407607	1.59757e-07	1.18541e-06
Gm38403	2.32905	0.940733	1.87555e-05	0.000103515
Cpxm2	-2.32807	4.95507	3.23423e-71	2.47142e-69
Ccdc30	-2.32687	2.59611	1.84567e-15	2.6871e-14
Trim75	2.32066	0.44119	9.36933e-05	0.000457905
Cntn2	2.31211	5.22323	1.31229e-13	1.68213e-12
Serpina3i	2.30875	1.41603	6.20234e-13	7.58484e-12
Gstm4	2.30822	0.998103	0.000475907	0.0019874
Rasl12	-2.30674	0.69864	2.08517e-07	1.53078e-06
Rnu3a	2.29764	5.01239	8.74131e-96	1.35844e-93
Vstm5	-2.29624	1.40332	6.91978e-10	6.60051e-09
Ccdc64b	-2.29265	3.44244	6.66699e-20	1.22134e-18
Sytl1	-2.28872	1.07484	0.0104861	0.0304054
A2m	2.28802	2.41027	1.26844e-35	3.96021e-34
Alpk3	2.28784	0.597973	0.00247927	0.0086834
Pax8	2.28515	1.35134	8.0304e-14	1.04683e-12
Tmem132cos	-2.28347	0.338087	0.00226778	0.00804659
A430093F15Rik	2.2805	0.691606	3.25873e-05	0.000173419
Zfp429	-2.27899	1.5524	0.000115644	0.000555179
Abcb1a	2.27489	1.14295	2.88746e-14	3.86232e-13
Sepp1	2.26527	3.33549	1.48458e-47	6.07493e-46
Ildr2	-2.26441	4.2928	2.70139e-22	5.46242e-21
Styk1	-2.2599	3.00704	2.30991e-14	3.11085e-13
Ppp1r14c	2.25074	0.590628	1.13482e-05	6.48046e-05
Ankrd13c	-2.23661	5.85644	1.0511e-05	6.0423e-05
Capzb	2.23504	8.23273	0.000835959	0.0032875
Kcnd2	-2.2294	8.92891	4.77799e-197	4.13027e-194
Mak	-2.22291	0.575523	0.000196033	0.000895123
Tmem132b	-2.22291	0.598046	0.000196033	0.000895123
4933406C10Rik	-2.22288	2.01746	5.51403e-08	4.32829e-07
Hgd	-2.218	0.590662	2.31113e-07	1.68327e-06
Snai3	-2.21109	0.301883	0.000865614	0.00339159
Lgals9	-2.21047	2.81348	1.46456e-17	2.38029e-16
Tmem116	2.2051	2.77814	1.81373e-34	5.47721e-33
Hist1h3d	-2.20462	0.575602	4.1225e-06	2.51959e-05
1700012D14Rik	2.20146	1.72617	0.000283813	0.00125493
6530402F18Rik	-2.19171	0.0534447	0.00391841	0.0129407
Cilp	-2.19171	0.346937	0.00391841	0.0129407
0610031O16Rik	2.19125	2.29085	1.85538e-12	2.18957e-11
Tnnt3	2.18543	1.68835	1.37003e-15	2.01369e-14
Pirb	2.17821	0.264946	9.6972e-05	0.000472926
Adcyap1r1	2.17761	5.16151	4.09516e-39	1.39852e-37
Car2	2.17102	2.79275	4.77618e-20	8.80791e-19
Tm4sf1	-2.17099	5.97046	4.8788e-110	1.03813e-107
Synpr	-2.1699	3.62894	7.95573e-11	8.29832e-10
Gpc5	2.1589	3.2613	2.0416e-46	8.13758e-45
Majin	2.15796	0.0534513	0.00145888	0.00541394
Gm6904	2.15796	0.137684	0.00145888	0.00541394
Nostrin	-2.15597	1.67049	1.35798e-09	1.2631e-08
Ptgir	-2.15413	0.874808	0.0185072	0.0490369
Slc7a15	-2.15413	0.39041	0.0185072	0.0490369
Olfr1317	-2.15228	0.6274	2.93168e-05	0.00015692
Ankrd33b	2.13781	1.53342	3.9842e-06	2.44262e-05
Slc14a1	2.13145	2.0966	3.77943e-15	5.39456e-14
D430019H16Rik	2.13036	3.12291	1.70154e-30	4.59649e-29
Adgrb1	2.12947	0.590717	1.38517e-06	9.04972e-06
Acaa1b	2.12655	0.490053	4.37146e-09	3.86185e-08
Hpse	2.12421	0.818354	0.000165984	0.00077245
Unc13b	2.12298	5.5391	8.08461e-71	5.97959e-69
Fam84a	2.11418	0.684583	5.66775e-05	0.000289051
Gm765	-2.11071	0.329187	4.41032e-06	2.68719e-05
Gm16223	2.10655	0.178134	1.94691e-05	0.000107154
Ankrd6	-2.10129	3.67307	2.72019e-25	6.12751e-24
Apcdd1	2.10122	3.92922	1.53346e-55	7.46807e-54
Gjb2	-2.09555	2.70705	4.35474e-26	1.01569e-24
Sarm1	-2.09371	0.663571	0.00672253	0.020584
Plac8l1	2.0855	0.552824	9.87731e-08	7.46519e-07
Lipg	-2.08332	1.63089	6.68071e-07	4.59249e-06
Slc2a3	-2.08332	2.73381	6.68071e-07	4.59249e-06
Lrfn2	2.07903	1.07514	4.27355e-09	3.78167e-08
Asb5	2.07732	3.06223	4.55944e-46	1.79663e-44
Slc37a1	2.07151	0.255553	0.000839769	0.00329967
Spink10	-2.0703	3.95631	5.16086e-52	2.25886e-50
Bank1	2.0681	0.449415	0.000282513	0.00125038
Fgf10	2.0681	3.27668	0.000282513	0.00125038
Gldc	2.06519	2.765	8.86462e-27	2.10303e-25
Eva1c	-2.06312	2.38657	2.94317e-29	7.60877e-28
Cdk2ap2	2.06112	0.805581	3.9011e-06	2.39485e-05
E230016K23Rik	2.06112	0.568092	3.9011e-06	2.39485e-05
Ston2	2.05978	4.32231	1.9279e-69	1.36045e-67
Gbp3	2.05753	1.2078	2.01751e-08	1.658e-07
Pigw	-2.04941	1.77951	1.56042e-08	1.29935e-07
Ccdc67	-2.03049	1.06954	4.5784e-06	2.77736e-05
Piwil2	-2.03049	0.99248	4.5784e-06	2.77736e-05
Cfap77	-2.02609	0.301974	0.000348359	0.00150708
Ttc6	2.023	0.255551	1.88752e-05	0.000104134
Zfp947	-2.02194	2.11949	5.75373e-11	6.07016e-10
Catsper3	2.02119	1.39058	1.04989e-10	1.08505e-09
Noxred1	-2.01759	1.91385	6.88027e-07	4.71561e-06
Fam89a	-2.0132	1.82159	3.53029e-12	4.05881e-11
Unc5d	2.00977	5.57827	9.10492e-114	2.33204e-111
Myrip	2.00973	0.301908	0.000477972	0.00199448
Myo3b	2.00973	0.178071	0.000477972	0.00199448
Tnfsf18	-2.0079	0.670493	5.042e-05	0.000259821
Tacr1	-2.00448	1.81512	4.07115e-08	3.24168e-07
Fam155a	2.00425	4.42975	2.23534e-47	9.12004e-46
A330033J07Rik	2.00225	2.21505	1.98156e-13	2.49381e-12
Lacc1	-1.99631	2.29026	8.38438e-16	1.24962e-14
Fbxl15	1.9902	0.811891	0.00434636	0.0141512
4930593A02Rik	-1.98924	1.40757	1.48011e-10	1.50747e-09
Mttp	-1.98472	2.2222	5.29646e-16	7.97988e-15
Hist1h2ak	-1.97947	0.127467	0.00415197	0.0135887
1500009L16Rik	1.97118	2.76515	2.13179e-27	5.20015e-26
Pls1	1.9711	0.670607	0.0135193	0.0376608
Apol7d	-1.96512	0.505998	8.21242e-05	0.000406244
Adh7	1.96405	2.08063	1.3045e-09	1.21499e-08
Gm16432	1.96026	2.56098	4.07786e-19	7.20318e-18
3830408C21Rik	-1.95869	2.27891	2.69895e-07	1.95032e-06
1700007F19Rik	-1.9576	0.952424	4.09741e-08	3.26071e-07
Myocd	1.95428	2.36405	1.0509e-08	8.93364e-08
Id4	1.95123	1.78942	1.91453e-11	2.09493e-10
1810021B22Rik	-1.92879	0.449422	7.46201e-06	4.40111e-05
A230077H06Rik	1.92869	0.0855577	0.00241798	0.00849888
Cd101	1.92721	1.13781	0.00015242	0.000713649
Exoc3l	1.92653	0.590618	1.01471e-05	5.85257e-05
Nyap2	1.92613	1.31555	6.963e-07	4.76759e-06
Acot12	1.92613	1.19297	6.963e-07	4.76759e-06
Ret	1.9251	4.72193	4.74683e-88	5.56385e-86
Xdh	-1.92419	1.39055	5.0701e-05	0.000261074
Slit1	-1.92419	1.30189	5.0701e-05	0.000261074
Gda	-1.91854	1.76643	6.21818e-09	5.41584e-08
Zfp160	1.91571	6.5258	1.5167e-132	5.66959e-130
Eppk1	-1.91267	1.59425	1.04338e-07	7.85146e-07
Tmem45b	-1.91165	0.337936	0.000937143	0.00364379
Ccdc169	-1.91027	2.77762	1.96767e-21	3.83848e-20
Sphkap	1.90934	0.44116	0.000449894	0.0018882
Dupd1	-1.90422	0.255571	0.00252391	0.00881522
Brinp1	-1.8995	7.71682	1.71805e-144	7.9208e-142
Sft2d2	-1.89891	4.1846	5.37783e-49	2.26081e-47
Gm14023	1.89839	0.301962	0.00740899	0.0224084
Perm1	-1.8964	2.24345	2.52289e-08	2.05259e-07
Tmem141	1.89328	1.251	2.25488e-07	1.64663e-06
Kng2	-1.89323	1.56794	6.46187e-08	5.02102e-07
Col13a1	-1.8932	0.178121	0.00690106	0.0210193
Nup210	-1.8932	0.127407	0.00690106	0.0210193
1700086O06Rik	-1.89286	3.51214	1.88675e-29	4.91444e-28
Rsph3a	1.88539	1.21217	0.00134143	0.00501441
Rem1	1.87995	1.9728	2.95128e-17	4.71897e-16
Pde1c	-1.87916	3.64905	1.19343e-42	4.38999e-41
Slc25a54	1.87722	1.33362	2.56493e-08	2.08312e-07
9530062K07Rik	-1.87556	0.892985	0.000214693	0.000972303
Rab6b	-1.86801	2.70356	1.24346e-15	1.83351e-14
Gpat2	-1.8663	2.22682	2.62653e-07	1.89898e-06
Ccdc152	1.85529	3.41872	7.93724e-38	2.61381e-36
Prkcb	-1.85415	1.99509	1.74104e-06	1.12525e-05
Efcab8	1.85315	3.0668	4.47091e-20	8.26699e-19
5830473C10Rik	1.8516	0.147887	0.00405544	0.0133296
4930447C04Rik	-1.85084	0.958107	0.0015228	0.00562098
Ndufa4l2	-1.85084	0.168102	0.0015228	0.00562098
Cyp2c55	-1.849	1.79264	1.61589e-07	1.19707e-06
Gm10635	-1.84523	2.70206	2.90364e-17	4.64818e-16
Gng4	-1.83971	2.7314	3.87925e-08	3.09601e-07
Cdk15	-1.83971	2.17817	3.87925e-08	3.09601e-07
Lrtm1	-1.83521	1.42461	1.06718e-06	7.1031e-06
Ccdc27	1.83416	0.399065	7.8559e-05	0.000389165
Tnr	1.83416	0.311092	7.8559e-05	0.000389165
Nudt7	-1.83117	3.01916	2.86613e-16	4.38026e-15
Cthrc1	-1.82906	5.4846	1.09431e-82	1.12951e-80
Glra1	-1.82861	1.18782	0.000344405	0.00149091
Nxph1	-1.8286	0.612989	0.000344405	0.00149091
Hr	-1.8286	0.560422	0.000344405	0.00149091
Clvs1	1.82842	2.47795	0.000412628	0.00175063
Tgm2	1.82176	4.88027	1.45626e-43	5.44365e-42
Gjc3	1.81895	0.338033	0.00222306	0.00790211
Atp8b5	1.81115	1.66347	4.79977e-06	2.90655e-05
Grin2d	1.81051	3.59989	9.60199e-32	2.66677e-30
Rgs7	1.80989	4.39882	1.5643e-28	3.94095e-27
Apol8	-1.80336	1.44918	3.99358e-07	2.82388e-06
Krt20	-1.80143	0.465772	0.0113736	0.032542
Cers3	-1.80143	0.255488	0.0113736	0.032542
Rasgrp1	-1.80143	0.158052	0.0113736	0.032542
Hist1h2bl	-1.80143	0.158063	0.0113736	0.032542
Mr1	1.80021	1.71257	2.46514e-13	3.08276e-12
Tmco1	1.7983	3.64876	1.87056e-27	4.57906e-26
A630023A22Rik	-1.79715	4.70799	2.52239e-63	1.48456e-61
Stac	-1.79511	4.16982	1.13418e-37	3.70848e-36
Hist1h2bb	1.79487	0.684641	0.00122134	0.00462423
Neurl1a	-1.79015	4.57742	4.71348e-31	1.28584e-29
Sntg1	-1.78735	1.33342	0.00245767	0.00861213
Trat1	-1.78735	0.246108	0.00245767	0.00861213
Ccdc78	1.78483	2.09108	2.21808e-13	2.7864e-12
Lsmem1	-1.78411	3.49872	1.98545e-25	4.49439e-24
Noct	-1.78333	9.20471	5.73334e-175	3.96489e-172
Serpinb2	-1.78283	3.72711	1.88879e-11	2.0684e-10
Trpc6	1.78143	3.20717	3.94303e-45	1.51911e-43
Cyp4f17	1.77925	5.48455	4.58329e-101	8.02424e-99
8030423F21Rik	1.77637	0.552815	0.000672594	0.00270269
Sugct	-1.77618	5.6027	5.86756e-79	5.5207e-77
Twf2	1.77179	1.96378	4.31547e-06	2.63171e-05
Trpv6	1.76172	0.407564	0.000371249	0.00159464
Camk4	1.75829	6.25977	4.30793e-128	1.45324e-125
Antxrl	-1.75689	2.78617	2.07075e-18	3.50558e-17
D130043K22Rik	-1.7549	0.677617	0.00146305	0.00542795
Lrriq1	-1.75402	1.35125	0.00668884	0.0204993
Cd5	1.75034	2.30424	2.01221e-10	2.01381e-09
Anxa8	-1.75023	3.80356	4.61584e-38	1.53466e-36
Lsm5	1.74931	0.346909	0.00365497	0.0121724
Zfp804b	1.74231	2.1069	1.58514e-13	2.02065e-12
Dusp27	-1.74144	1.59786	1.06257e-05	6.10571e-05
Lrrc17	-1.7394	6.64628	5.99008e-95	9.10427e-93
Clic3	-1.73885	0.856129	4.55536e-05	0.000236506
Pisd-ps2	-1.73881	4.24378	1.32118e-28	3.33453e-27
Slc44a5	1.73703	1.85303	8.65497e-09	7.43059e-08
B3galnt1	1.73088	5.2312	1.18973e-78	1.10437e-76
0610040J01Rik	1.7286	3.41053	8.49414e-35	2.58772e-33
Fam189a1	1.7255	3.59474	2.31466e-34	6.97474e-33
Bcl2l14	1.72237	0.178075	0.00108899	0.00416648
Sp100	1.72237	1.06954	0.00108899	0.00416648
Nfam1	1.72237	0.197868	0.00108899	0.00416648
Tdrp	-1.717	2.04237	1.32707e-07	9.92683e-07
Hal	1.70847	1.24612	6.09118e-06	3.63919e-05
Clu	1.70841	3.15398	7.34319e-15	1.0259e-13
Pclo	-1.7083	2.90316	8.10127e-14	1.05408e-12
A330015K06Rik	1.70515	7.96612	2.81741e-147	1.3917e-144
Clcn6	-1.70343	6.29969	0.0185699	0.0491655
Tssk4	-1.70343	0.085607	0.0185699	0.0491655
Cntnap5b	-1.70343	1.52176	0.0185699	0.0491655
Orm3	-1.69654	0.274281	0.00232246	0.00821496
Cd4	-1.69654	0.390527	0.00232246	0.00821496
A330093E20Rik	-1.69654	1.50594	0.00232246	0.00821496
Cntnap2	-1.6942	3.68167	9.64643e-26	2.22366e-24
Gstm2	-1.69046	1.85927	8.58978e-07	5.79538e-06
Hapln1	1.68686	2.41871	3.39842e-27	8.17453e-26
Nol10	1.68384	6.73809	0.0111057	0.031934
Elavl2	1.68222	3.94348	4.99083e-48	2.06054e-46
Hist1h4k	-1.68021	0.355763	0.000184881	0.000848968
Irf6	-1.68021	0.537288	0.000184881	0.000848968
Gm11351	1.68002	1.46582	9.6049e-06	5.56537e-05
Pyroxd2	1.67811	3.82909	1.07106e-40	3.78869e-39
Ccdc60	-1.6778	0.432826	0.00137274	0.0051204
1700125H20Rik	1.67613	0.178128	0.0059579	0.0185678
Adgrv1	1.67271	2.96262	2.19895e-26	5.17238e-25
Hist1h3c	-1.67261	0.390413	0.0107536	0.0310766
Hormad2	-1.67261	0.292701	0.0107536	0.0310766
Spta1	1.67252	1.58327	6.02539e-10	5.7873e-09
Htr2a	-1.66766	5.83511	1.27481e-77	1.16e-75
Myo1a	1.66627	0.217348	0.00175062	0.0063785
Rab3b	-1.66429	0.940711	9.27315e-06	5.38216e-05
Rbm20	1.66425	3.85681	3.15938e-33	9.25792e-32
Irx1	-1.66269	2.96995	1.01687e-08	8.65501e-08
Srp54c	-1.65967	3.18462	6.97368e-08	5.4005e-07
Msx2	-1.65913	0.677597	6.6123e-05	0.000331974
Fgfbp3	-1.65132	0.568042	0.00625945	0.0193722
Grid2	1.6504	7.13473	8.00387e-94	1.16528e-91
Hilpda	1.65039	2.27443	1.0205e-13	1.31666e-12
Unc13d	1.64497	1.87168	4.55426e-08	3.60767e-07
Trhde	-1.6449	3.02764	6.7816e-12	7.63192e-11
Tomt	-1.64093	1.07489	0.000286927	0.00126667
Fhl5	1.64038	3.29752	8.9132e-14	1.15646e-12
Gm10560	-1.63727	1.53741	6.43648e-08	5.0041e-07
Ccdc40	-1.63573	0.61292	0.00366021	0.0121822
Sox15	-1.63573	0.217321	0.00366021	0.0121822
Itih5	-1.6326	2.39934	2.09394e-09	1.9129e-08
Akr1b8	1.63131	3.85225	1.94019e-46	7.77821e-45
Ccdc68	-1.62747	3.75147	3.98305e-21	7.63014e-20
Fbxw18	-1.62382	1.41577	0.00214876	0.00768144
Rims2	1.62224	5.37039	9.67282e-42	3.48398e-40
Fbxo41	-1.62145	1.76619	3.09261e-06	1.93284e-05
Slc4a10	-1.61918	2.82368	6.08825e-05	0.000308902
Rbfox1	1.61543	7.0288	1.67162e-33	4.96141e-32
Fam198a	1.61316	2.52215	3.45522e-09	3.08715e-08
Efcab11	-1.61225	3.93742	6.3329e-29	1.61012e-27
Fbxl13	-1.61051	6.81195	4.57795e-96	7.19518e-94
Alx1	1.6079	1.75269	0.00279292	0.00963075
Lrrc9	1.6079	0.168127	0.00279292	0.00963075
Kcng2	-1.60055	0.969671	0.000442902	0.00186477
A330049N07Rik	1.59904	0.407617	0.00962223	0.0283039
Akt1	1.59203	5.93379	0.0181018	0.0481687
Npy2r	1.59203	0.506065	0.0181018	0.0481687
E030030I06Rik	-1.59039	3.40861	1.03847e-16	1.61201e-15
Zfyve28	1.59017	4.21571	5.67417e-35	1.74399e-33
Ctdspl2	-1.58633	5.03042	0.0171273	0.0459886
6230400D17Rik	-1.58059	1.09092	3.32256e-05	0.000176611
Cerkl	1.57937	1.79274	2.26473e-10	2.25999e-09
Artn	-1.57817	1.02615	0.00986646	0.0289055
Cyp2s1	-1.57817	0.207616	0.00986646	0.0289055
Trim7	-1.57511	2.8052	1.80053e-08	1.48853e-07
Kcnab1	1.57147	8.84678	1.32836e-162	7.349e-160
Cela2a	1.57104	1.49822	3.96107e-09	3.51866e-08
5033428I22Rik	1.57022	1.85631	2.58122e-07	1.8672e-06
Kazald1	-1.56773	0.719255	0.00333978	0.01125
Angptl6	-1.56694	2.48816	9.31495e-07	6.24201e-06
Hook1	-1.56135	0.824705	0.00115175	0.00438354
Ctf1	1.5596	2.05084	9.49813e-11	9.86992e-10
Katnal2	-1.55956	1.85618	2.70475e-08	2.18896e-07
Prkar1b	-1.55727	4.03689	5.99584e-28	1.48617e-26
Rasgef1a	1.55687	0.373233	0.00239549	0.00843483
Mrvi1	1.55653	6.00557	1.38088e-69	9.79436e-68
Gabrb2	-1.55391	2.39071	2.94693e-10	2.90513e-09
Plbd1	1.55163	2.01216	4.61745e-11	4.90883e-10
Rnf17	-1.54897	1.35549	1.07924e-05	6.19636e-05
Rpl7a	-1.54791	5.24589	4.10208e-46	1.62567e-44
Adrbk2	1.54747	2.21984	7.04641e-07	4.81279e-06
B4galnt3	1.54706	0.197898	0.00441992	0.0143395
Gm2516	1.54706	0.246058	0.00441992	0.0143395
Myh3	1.54706	1.03702	0.00441992	0.0143395
Sema5b	-1.54654	2.91654	1.4022e-06	9.13944e-06
Kcns3	-1.54432	3.93786	8.64895e-30	2.27855e-28
Bend6	1.54316	4.59344	2.9869e-27	7.22235e-26
Cntn1	1.54136	1.55278	9.20638e-09	7.87955e-08
Syndig1	1.541	6.33539	3.87978e-103	6.96899e-101
Nebl	-1.53783	3.39681	4.34297e-21	8.28519e-20
Nmnat3	-1.53701	4.53785	3.6512e-28	9.09904e-27
1700108J01Rik	1.53444	0.158066	0.00821028	0.024574
Grik3	1.53034	0.656518	7.18151e-06	4.25385e-05
Cd59a	1.52896	4.61981	2.17381e-24	4.74976e-23
Fmod	-1.52714	4.17152	4.49474e-34	1.3456e-32
Clec9a	1.52564	0.117126	0.00111315	0.00425187
Hfe	1.52564	0.147977	0.00111315	0.00425187
Gm3716	1.52554	1.76661	2.56819e-12	2.99499e-11
Ednrb	-1.52545	0.620199	3.50261e-06	2.17045e-05
Best3	-1.525	2.79028	5.8359e-06	3.4927e-05
Etnk2	1.52496	0.77302	1.28649e-05	7.28942e-05
Trcg1	-1.52398	1.76957	1.62497e-05	9.04788e-05
Gm32014	1.51819	1.63856	6.7415e-09	5.83856e-08
Txlnb	-1.51775	1.17804	0.000612409	0.00248467
Mthfsl	-1.51775	2.28073	0.000612409	0.00248467
Ube2u	1.5176	0.264878	0.0153846	0.0421106
1700110K17Rik	1.5176	0.0642358	0.0153846	0.0421106
Ubap2	-1.51622	6.99566	0.00103733	0.00398205
A730090N16Rik	1.51527	5.31418	8.00338e-68	5.19694e-66
Kcna4	1.51448	0.147949	0.00203774	0.00730724
Gm19299	1.51448	0.799055	0.00203774	0.00730724
Cln3	-1.51426	4.25891	6.22384e-38	2.05938e-36
Unc5a	-1.51216	0.843611	0.00300669	0.0102858
Ociad2	1.51185	1.90199	6.1252e-06	3.65635e-05
Esr1	-1.51071	4.02214	5.03565e-20	9.26171e-19
Ldhc	-1.50938	0.663447	0.00515213	0.0163214
Bfsp1	-1.50938	0.58319	0.00515213	0.0163214
Ano5	1.50901	3.77588	4.9911e-29	1.27131e-27
AA415398	-1.50725	1.66358	1.13711e-06	7.54672e-06
Pcdh15	-1.50486	2.17046	3.14698e-06	1.96328e-05
C1s1	-1.50486	1.95821	3.14698e-06	1.96328e-05
Add2	1.50345	0.705558	0.000518838	0.00214211
Cep72	-1.502	1.89888	8.73965e-06	5.08746e-05
Angptl8	-1.50111	0.301931	0.0154104	0.042156
She	1.50077	0.274364	0.00374809	0.0124406

## Sheet: B6xPWK
Gene	log2 (wild/B6 counts)	log2 (CPM)	p-value	FDR
Peg3os	11.9381	4.76143	9.30612e-122	3.06459e-119
H19	-10.6592	7.44091	1.45498e-211	2.01238e-208
Ifi202b	10.1853	3.46644	1.10229e-70	9.18418e-69
Peg3	9.8472	8.18704	1.29112e-219	1.98417e-216
Mas1	9.65036	2.13799	6.04926e-57	3.40111e-55
Igf2	9.23719	6.66601	1.75889e-192	1.73766e-189
Kcnq1ot1	9.06952	9.12102	3.16181e-250	8.7462e-247
A330076H08Rik	9.04592	3.59909	3.45491e-38	1.2444e-36
Slc22a1	-8.8047	2.02853	5.12578e-32	1.51161e-30
4930539N22Rik	-8.57818	1.84946	1.34756e-27	3.43244e-26
Kcnq1	8.48661	9.13426	4.75195e-250	1.0954e-246
Snhg14	8.36703	1.79251	1.86944e-24	4.20518e-23
Grb10	-8.03802	10.4177	2.31647618709127e-319	1.60195910718297e-315
Ahctf1	7.85151	7.29936	1.45902e-17	2.30768e-16
Mir543	-7.84916	0.656394	2.96246e-17	4.60898e-16
Mir300	-7.70685	0.811906	9.00784e-16	1.30458e-14
Gm20756	-7.64575	2.35063	3.53515e-15	4.95889e-14
Cdkn1c	-7.51519	1.81178	5.45982e-14	7.0773e-13
Sgce	7.43197	5.58721	5.16832e-152	3.24923e-149
Ndn	7.42915	1.00378	1.79391e-13	2.23975e-12
4930563M21Rik	-7.33339	0.590614	1.68187e-12	1.95151e-11
Usp29	7.29782	3.55757	4.80355e-79	4.99533e-77
Mir376a	-7.25374	0.506004	6.64084e-12	7.30704e-11
Nlrp5-ps	-7.22477	4.46112	3.5691e-55	1.93585e-53
Mir493	-7.21219	1.34673	1.32032e-11	1.42112e-10
Ralyl	-7.18944	5.18249	5.26928e-129	2.02443e-126
Uqcrc2	7.13731	5.41325	2.91842e-11	3.05793e-10
A630001G21Rik	-7.12534	0.874566	5.22548e-11	5.34964e-10
Igf2os	6.99873	2.44522	1.91766e-46	8.2115e-45
Trim12c	-6.98439	2.56378	4.12851e-10	3.90571e-09
Nos1	-6.93417	0.117163	8.2313e-10	7.5797e-09
Hist1h2ad	-6.93417	0.28358	8.2313e-10	7.5797e-09
Trim12a	-6.77208	2.06624	6.54761e-09	5.54223e-08
Olfr1033	-6.77208	1.30602	6.54761e-09	5.54223e-08
Skint6	6.77106	1.88027	4.86358e-09	4.18595e-08
Zim1	-6.67642	6.05749	2.93596e-137	1.35358e-134
Mir665	-6.45345	0.217369	2.10761e-07	1.51195e-06
Sugt1	6.4375	6.25523	1.92276e-07	1.38581e-06
Plagl1	6.38176	7.81738	4.30662e-211	5.41498e-208
L3mbtl1	-6.38032	0.31101	4.23269e-07	2.92712e-06
Nrros	-6.30328	0.167984	8.51081e-07	5.59206e-06
A330049N07Rik	-6.22189	0.407617	1.7136e-06	1.08421e-05
Dlk1	6.18732	4.26194	7.29364e-94	1.12087e-91
Il18r1	6.16783	1.9528	2.94747e-71	2.51644e-69
Lgals4	-6.13563	0.590593	3.45542e-06	2.10074e-05
Rhag	-6.13563	0.147848	3.45542e-06	2.10074e-05
Peg10	6.11881	3.87955	4.05077e-79	4.24441e-77
Mir3070a	-6.04944	2.02589	2.39355e-24	5.34817e-23
Depdc1a	6.00286	2.85562	7.84518e-06	4.48189e-05
Zfp960	-5.8408	0.0748331	2.86451e-05	0.00014945
Dlat	5.78421	4.83356	3.50608e-05	0.000180404
Mir3070b	-5.72742	1.31077	5.82385e-05	0.000287472
Lrrc72	5.66106	0.188033	7.44275e-05	0.000361069
Mest	5.61704	6.78451	1.1878e-162	8.2142e-160
Jund	-5.60436	2.39643	0.000118746	0.000554295
Mir376c	-5.56166	1.8747	5.00584e-30	1.39028e-28
Peg12	5.5264	0.15802	0.000158535	0.000715401
1700110K17Rik	-5.46982	0.0642358	0.000242938	0.00105332
Klk9	-5.46982	0.390354	0.000242938	0.00105332
4933405E24Rik	5.37787	0.217245	0.000339066	0.00142024
Slc25a2	-5.32143	0.255563	0.000499023	0.00201454
Mir666	-5.1995	2.01776	1.21546e-32	3.68663e-31
Zmynd15	-5.15601	0.0748905	0.00103007	0.00386304
Mir673	-5.06153	1.35567	6.93048e-21	1.31489e-19
Meg3	-4.96286	10.0649	7.71541e-268	3.55706e-264
A230057D06Rik	4.8637	5.51914	1.94727e-60	1.19171e-58
C130046K22Rik	-4.84421	2.0065	3.17177e-32	9.45448e-31
Mir1197	-4.82117	1.93481	1.1554e-31	3.37137e-30
Il17d	4.81015	2.14774	0.00343476	0.0111884
C4a	4.81015	0.255474	0.00343476	0.0111884
Guca1b	-4.79193	1.15295	3.42046e-10	3.25367e-09
Cnst	-4.7544	5.53995	0.00447677	0.0140819
Selenbp2	-4.7544	2.50694	0.00447677	0.0140819
Mir329	-4.7544	0.346915	0.00447677	0.0140819
Mir758	-4.74975	2.31088	5.55611e-30	1.53081e-28
Mir667	-4.71267	2.17814	3.84103e-29	1.0376e-27
Mir882	-4.70761	0.490014	1.28148e-09	1.16683e-08
Zdbf2	4.70606	4.58732	4.83398e-86	6.13384e-84
Nedd9	4.67572	7.61879	2.80421e-09	2.47827e-08
Slc22a27	-4.66853	2.215	2.11352e-34	6.79815e-33
Rian	-4.6201	11.105	0	0
Caskin1	4.55737	1.36861	0.00756353	0.0222105
C3ar1	4.55737	0.567827	0.00756353	0.0222105
Mir654	-4.55402	1.96394	8.57207e-26	2.01977e-24
Thsd7b	4.52498	4.37553	2.81937e-107	7.08994e-105
Mir434	-4.52258	0.855995	1.79068e-08	1.45859e-07
Ctla2a	4.52149	2.12203	8.30865e-14	1.06208e-12
Slfn2	-4.50201	0.612675	0.00946478	0.0269523
Gpank1	-4.50201	0.473834	0.00946478	0.0269523
Lilrb4a	-4.50201	2.52438	0.00946478	0.0269523
Rtl1	-4.46179	6.1642	3.76127e-141	1.85793e-138
Gm3363	-4.41192	1.37744	5.66052e-13	6.82569e-12
Mirg	-4.38404	8.15202	1.06412e-206	1.13214e-203
Srrm4os	-4.36635	0.785967	1.28812e-07	9.45643e-07
Mir540	-4.34376	1.59075	6.5384e-22	1.29374e-20
Zfp605	-4.32082	3.22536	1.58924e-35	5.27116e-34
Slc25a31	4.29561	0.106737	3.69159e-07	2.56833e-06
Srrm4	-4.25193	0.90495	4.78706e-07	3.29566e-06
Dand5	4.25068	1.48169	0.0168954	0.0441572
Rbm26	4.25068	7.45155	0.0168954	0.0441572
Adgrl4	4.25068	2.41508	0.0168954	0.0441572
Lrriq3	4.25068	2.11968	0.0168954	0.0441572
A230077H06Rik	4.25068	0.0855577	0.0168954	0.0441572
Htr1b	4.25068	1.41994	0.0168954	0.0441572
Wdr83	4.25068	3.12694	0.0168954	0.0441572
Mir323	-4.23329	1.84987	1.9336e-24	4.3415e-23
4921539E11Rik	4.23211	0.560486	7.39491e-07	4.91005e-06
6430411K18Rik	-4.10944	3.62785	4.82233e-74	4.35933e-72
Hist1h2bg	-4.08434	0.568064	3.47404e-10	3.29783e-09
Olfr78	-4.04709	0.73289	6.57511e-10	6.10747e-09
Mir299a	-4.00885	0.346919	1.24336e-09	1.13436e-08
9330159M07Rik	-3.99165	0.811699	6.5582e-06	3.78101e-05
Paqr5	-3.95064	2.55646	2.81837e-26	6.77927e-25
Piwil2	-3.92919	0.99248	4.43383e-09	3.83517e-08
Cntn4	3.87707	2.74013	5.25873e-55	2.8301e-53
Impact	3.85512	7.33658	3.56829e-185	2.90312e-182
Hjurp	-3.827	4.94587	8.65066e-30	2.36457e-28
Tmem150cos	3.81778	0.95225	3.27967e-08	2.60248e-07
Cmah	-3.79085	1.71226	4.11356e-17	6.35695e-16
Zfp947	-3.7385	2.11949	7.87777e-25	1.80393e-23
Frmpd1	3.73128	0.473992	1.83531e-10	1.79014e-09
A730017L22Rik	-3.72045	3.94413	5.70108e-70	4.61121e-68
Gm16432	3.66825	2.56098	5.96302e-69	4.73991e-67
Mir382	-3.6309	1.11202	1.45992e-17	2.30768e-16
Siah3	3.61296	0.127472	4.70725e-07	3.24395e-06
1700120E14Rik	3.61296	0.457645	4.70725e-07	3.24395e-06
Gabrb1	-3.58076	5.5495	2.61285e-103	5.73624e-101
Kcnip4	3.57007	9.26284	2.93933e-263	1.01635e-259
4933402J07Rik	3.56491	2.41246	1.77831e-60	1.09315e-58
Slc22a18	-3.55437	2.02061	2.51317e-28	6.60829e-27
2500002B13Rik	-3.5482	0.59056	3.00183e-09	2.64616e-08
A430093F15Rik	3.54473	0.691606	4.84206e-09	4.17262e-08
4930447C04Rik	-3.51095	0.958107	5.55055e-09	4.73441e-08
Gm4349	3.4985	0.473854	1.76559e-06	1.11506e-05
Asb4	-3.48578	0.590572	4.62924e-11	4.76392e-10
4930544M13Rik	-3.48411	0.399066	0.000323156	0.00135777
Sox30	3.48305	0.137677	0.000367597	0.00152909
Myrip	3.48305	0.301908	0.000367597	0.00152909
Zfp783	-3.48167	2.73271	3.8059e-22	7.66222e-21
Fam155a	3.44417	4.42975	2.26965e-108	5.81324e-106
Airn	3.41045	10.0431	7.8638e-249	1.55377e-245
Trim75	3.40476	0.44119	3.68108e-12	4.14601e-11
Ptgdr2	-3.39507	1.20271	2.85198e-10	2.72981e-09
Hist1h2bm	-3.39305	0.117131	3.47821e-08	2.74271e-07
She	3.37683	0.274364	6.61285e-10	6.1343e-09
Hmha1	3.36731	2.42681	1.93377e-48	8.62771e-47
Npy2r	3.29204	0.506065	4.62732e-11	4.76392e-10
Mir494	-3.26492	0.415915	1.52145e-05	8.31088e-05
Grm1	-3.26492	0.0642299	1.52145e-05	8.31088e-05
Kynu	-3.26492	0.449275	1.52145e-05	8.31088e-05
Cdh26	-3.26433	2.44139	1.13202e-14	1.53801e-13
Mir296	3.2381	0.246143	2.4215e-05	0.00012788
Ccdc68	-3.19453	3.75147	2.78648e-37	9.70775e-36
Pde1c	-3.17915	3.64905	1.88436e-33	5.92332e-32
Trp53cor1	-3.1719	3.83833	1.95325e-68	1.53497e-66
Ulbp1	3.1708	3.37663	1.6119e-71	1.40215e-69
Fam89a	-3.16192	1.82159	2.62814e-18	4.35327e-17
Gm5893	3.13264	0.529491	1.5715e-06	9.99787e-06
Kcnc2	3.13223	4.43711	1.41841e-74	1.30787e-72
Hal	3.11178	1.24612	0.00283207	0.00947287
Pla2g7	3.10363	2.50827	1.7835e-59	1.04524e-57
Dhrs9	-3.08693	3.18	3.70466e-38	1.33089e-36
Slc14a1	3.0846	2.0966	2.39737e-44	9.83918e-43
Vat1l	-3.08056	2.87892	5.42018e-23	1.14278e-21
Cpne5	3.07864	0.1275	2.95406e-06	1.80626e-05
Gpr149	-3.0614	2.70697	4.48927e-43	1.81553e-41
Trim5	-3.05578	1.23634	9.51717e-05	0.000451258
Pon3	-3.04557	2.48171	3.01211e-22	6.11754e-21
Dnah8	3.03615	1.63131	6.75491e-09	5.70722e-08
Apol8	-3.02458	1.44918	5.26569e-09	4.504e-08
Scn7a	-3.02274	2.88215	1.35425e-24	3.07563e-23
D17Ertd648e	3.02254	0.329123	5.53726e-06	3.24241e-05
E130006D01Rik	-3.02145	0.226876	4.28402e-06	2.5706e-05
Lyz2	-3.00801	0.656287	0.00421054	0.0133446
Stag3	-3.00187	1.64554	8.31509e-16	1.20678e-14
Krt18	2.99086	1.95777	2.98763e-11	3.12808e-10
1700011E24Rik	2.96325	1.57921	0.00556461	0.0170275
Slc15a2	-2.96151	0.583235	3.56304e-07	2.48389e-06
Hydin	2.94139	0.0534256	6.55936e-07	4.3976e-06
Adarb2	-2.92831	2.11987	1.4094e-27	3.58334e-26
Ppp1r1a	2.92013	0.117087	0.000317527	0.0013369
Lrrc48	-2.90308	1.57563	1.21306e-10	1.2053e-09
Snai3	-2.89735	0.301883	0.00031842	0.00133944
4933402D24Rik	-2.89735	0.0749493	0.00031842	0.00133944
Rgs20	2.87558	3.18079	4.31201e-81	4.80963e-79
1700040L02Rik	-2.87466	0.568049	1.13629e-06	7.34393e-06
Entpd1	-2.84087	2.22221	1.34508e-13	1.6928e-12
Kcnk1	-2.8372	3.22775	2.16963e-19	3.82758e-18
Hnmt	2.81835	0.147982	1.67814e-08	1.37096e-07
Cftr	2.81188	1.98153	4.92824e-25	1.13604e-23
Cd5	2.80468	2.30424	6.06369e-26	1.43854e-24
Adgrf5	-2.80405	3.19266	1.38241e-08	1.13675e-07
Nckap1l	2.79765	0.837085	0.010897	0.0304294
E230016K23Rik	2.79531	0.568092	1.98941e-09	1.78325e-08
Pou1f1	2.78377	0.537375	3.04507e-08	2.42606e-07
Styk1	-2.76003	3.00704	7.94213e-16	1.15629e-14
1700010K23Rik	-2.73675	0.905158	5.15189e-07	3.52926e-06
Stk31	2.7303	0.364508	0.0011237	0.00417681
Spx	-2.72877	1.16303	7.99637e-05	0.000385896
Lingo2	-2.72463	6.65617	1.93416e-123	6.68783e-121
Pcolce2	-2.72095	2.61997	1.56671e-26	3.82848e-25
Lrrc3b	-2.71965	2.74857	4.41308e-11	4.55502e-10
Pitpnm3	2.7144	2.4884	1.51339e-33	4.76804e-32
9530062K07Rik	-2.71128	0.892985	6.19549e-09	5.26674e-08
Spats2	2.70378	5.58618	0.000121836	0.000565666
Unc5a	-2.69637	0.843611	9.03712e-07	5.9182e-06
C330022C24Rik	-2.6942	0.779301	0.0149653	0.03992
E2f2	-2.6942	1.4939	0.0149653	0.03992
Vash2	-2.6942	4.62831	0.0149653	0.03992
Zfp931	-2.6942	1.27385	0.0149653	0.03992
Stxbp5l	2.67475	0.0534582	1.79052e-07	1.29455e-06
1700015F17Rik	2.65918	1.05349	4.92627e-13	5.96631e-12
Rnaset2b	2.62511	0.855884	0.00209843	0.00726676
Shcbp1l	-2.61811	2.09324	3.41828e-20	6.287e-19
Lockd	2.6058	2.26947	3.92855e-14	5.13571e-13
Luzp2	2.59896	4.09126	3.23695e-79	3.41757e-77
Sphkap	2.59722	0.44116	5.74894e-07	3.89641e-06
Adcyap1r1	2.59104	5.16151	3.33883e-55	1.81809e-53
Cd1d1	-2.58902	1.12235	5.59972e-08	4.30277e-07
Loxhd1	2.58833	0.053528	5.02199e-06	2.97088e-05
P2rx7	2.58833	0.560446	5.02199e-06	2.97088e-05
Adgrb3	2.58376	2.33624	9.41346e-38	3.35561e-36
Gfap	2.55683	0.23666	1.02521e-06	6.66339e-06
Ccdc173	-2.5447	1.90805	6.21367e-12	6.8753e-11
Rbpjl	2.52623	0.963928	3.12229e-12	3.5397e-11
Ecscr	-2.52324	1.13246	1.16723e-06	7.52282e-06
Gm2516	2.51432	0.246058	8.03213e-05	0.000387351
Cpne4	2.51165	0.29274	0.00389623	0.0124878
Krt8	2.51165	0.187956	0.00389623	0.0124878
Pisd-ps1	2.5051	3.83658	3.30184e-36	1.12482e-34
Mttp	-2.48316	2.2222	3.56016e-15	4.98891e-14
Hlf	2.48211	1.46603	2.70465e-16	4.03103e-15
1700016C15Rik	2.47904	2.59847	1.9953e-12	2.29783e-11
Ovgp1	-2.47555	0.940663	1.43383e-05	7.87895e-05
Plac8l1	2.47249	0.552824	3.22666e-06	1.96339e-05
Psrc1	-2.47212	4.13544	1.39551e-60	8.61666e-59
A330008L17Rik	-2.46306	0.274275	0.000104209	0.000491415
Clca3a1	-2.45841	4.75711	1.55717e-77	1.54944e-75
Asic2	2.44503	1.42462	8.79137e-21	1.65433e-19
Arhgap22	-2.44306	5.58986	1.83741e-90	2.54132e-88
Olfr1314	2.4414	1.08575	1.60678e-18	2.68398e-17
Fgfbp3	-2.42702	0.568042	2.46656e-05	0.000130053
Samd12	-2.40994	6.21553	3.32052e-107	8.20108e-105
Plvap	-2.40288	0.449317	0.0060699	0.0183825
Ppdpf	-2.40288	0.946509	0.0060699	0.0183825
Unc13c	2.40265	6.25188	2.43204e-130	9.89341e-128
Tmem236	-2.40226	0.799052	0.000180234	0.000804654
Znrd1as	2.38351	0.481964	5.02672e-05	0.000251124
Igflr1	-2.38019	1.6275	4.19011e-10	3.96127e-09
Unc93b1	-2.37554	2.55466	1.22791e-15	1.77094e-14
4933413L06Rik	-2.37554	2.0344	1.22791e-15	1.77094e-14
Pask	2.37097	3.66467	6.45695e-64	4.29356e-62
S100a7a	-2.33878	0.18803	0.000310262	0.0013111
Tnr	2.33595	0.311092	1.75044e-05	9.47194e-05
Ccdc62	-2.3351	2.84047	2.96292e-20	5.46402e-19
Vstm5	-2.31762	1.40332	8.08123e-09	6.77814e-08
Nat8l	2.3104	0.898944	1.22789e-06	7.89534e-06
Gm10635	-2.30788	2.70206	7.75947e-23	1.62855e-21
Add2	2.30054	0.705558	6.08981e-06	3.53751e-05
C130083M11Rik	-2.28913	2.6274	9.69452e-17	1.47023e-15
Pcdh15	-2.28665	2.17046	1.95058e-10	1.89989e-09
Nespas	2.28613	5.2903	1.14425e-88	1.52174e-86
Aqp7	-2.27495	0.16801	0.00235279	0.00806678
Gm15850	-2.27079	1.04796	0.000122516	0.00056825
AI504432	2.26905	0.24604	0.000154709	0.000701566
Ifitm1	2.26905	0.168155	0.000154709	0.000701566
Gbp7	-2.26751	1.30199	9.2954e-08	6.93819e-07
Pmaip1	-2.25977	5.3025	2.7712e-71	2.38065e-69
Blnk	2.25384	0.0749164	0.013158	0.0357261
Katnal2	-2.2501	1.85618	1.9295e-12	2.22576e-11
E030011O05Rik	-2.23903	4.09712	1.8022e-61	1.1228e-59
Kng2	-2.22802	1.56794	2.16077e-10	2.09576e-09
F2	2.21366	0.424452	1.81343e-05	9.77992e-05
Skap1	2.21358	3.24908	5.76792e-43	2.32584e-41
Tnfrsf18	-2.21035	2.35139	1.27979e-13	1.61357e-12
Egfl8	2.20822	0.874648	0.000269246	0.00115615
Gda	-2.20715	1.76643	7.80218e-16	1.13711e-14
Selenbp1	-2.20277	1.8146	0.000905199	0.00344519
Gm10584	2.19598	0.246032	0.00425647	0.0134779
Tmem132cos	-2.18701	0.338087	1.89298e-05	0.000101638
A2m	2.18681	2.41027	5.55961e-22	1.108e-20
Adgrg7	-2.17685	2.31738	9.86755e-09	8.17723e-08
Slc25a21	2.17645	2.94812	1.03175e-32	3.1432e-31
2010001A14Rik	-2.17458	1.92299	2.34599e-10	2.27064e-09
Gm10560	-2.16948	1.53741	4.06919e-08	3.18151e-07
Casq2	2.16818	1.06423	3.10832e-05	0.000161499
Pou6f2	2.16008	2.37914	2.58327e-07	1.83981e-06
Cntnap5b	-2.15637	1.52176	0.000348479	0.00145658
Zfp273	-2.14528	1.56037	0.0189509	0.048656
Gpr137b-ps	-2.14528	2.50484	0.0189509	0.048656
Stmn2	-2.14424	0.246115	3.14686e-05	0.000163318
Csrnp3	-2.14392	2.24613	3.66981e-13	4.46805e-12
Srsf12	-2.13732	0.963909	2.92353e-06	1.79155e-05
C230037L18Rik	2.13669	0.719256	1.26063e-06	8.09838e-06
Ccdc178	2.13669	1.09639	1.26063e-06	8.09838e-06
Mycbpap	2.13112	0.649239	0.000156575	0.000708636
Slc7a15	-2.12964	0.39041	0.00153283	0.00550717
D130043K22Rik	-2.12964	0.677617	0.00153283	0.00550717
9130019O22Rik	-2.12742	1.96676	2.56658e-09	2.28432e-08
Slc38a4	2.12064	5.945	4.88994e-49	2.2395e-47
Abcg1	-2.1076	1.65299	3.98585e-11	4.13256e-10
Fam110c	-2.10016	0.71922	5.20884e-05	0.000258963
Pnp2	2.09079	0.381861	0.00751431	0.0220753
Sema7a	-2.09076	5.85265	5.53165e-90	7.57507e-88
Atg101	-2.08523	2.77118	0.00693897	0.0206423
Gbp3	2.08332	1.2078	4.53471e-10	4.26084e-09
Eps8l3	-2.0754	1.13765	7.39827e-07	4.91005e-06
Diras2	2.07267	0.106702	8.99882e-05	0.000428886
Miat	-2.07198	0.0643004	0.000223126	0.00097722
Scarna2	-2.06495	3.45859	2.90887e-07	2.05164e-06
Trpm6	-2.06495	1.41609	2.90887e-07	2.05164e-06
Serpinb9b	2.06047	2.11736	2.94983e-20	5.44715e-19
A330074K22Rik	-2.05652	2.52572	1.68803e-10	1.657e-09
Evpl	-2.05469	0.620242	8.58303e-05	0.000411195
Mst1r	-2.0526	0.670483	0.00257896	0.00874256
Mpp7	-2.04993	7.08735	2.89948e-134	1.25321e-131
Slc45a2	2.04115	0.75983	2.94013e-08	2.34651e-07
Slc44a5	2.04115	1.85303	2.94013e-08	2.34651e-07
Gstm2	-2.03908	1.85927	2.72002e-10	2.61254e-09
Rcsd1	-2.03759	2.01766	4.7214e-07	3.25208e-06
AA415398	-2.03036	1.66358	2.78692e-09	2.46457e-08
Etnk2	2.02678	0.77302	5.13338e-05	0.000255579
Lpar3	2.02678	0.560451	5.13338e-05	0.000255579
Mannr	-2.02383	1.86868	1.06878e-13	1.35493e-12
Cpsf4l	-2.02237	3.14798	1.14774e-21	2.2581e-20
Ankrd35	-2.01801	0.283578	0.000368166	0.001531
Fbxo44	-2.01761	1.77274	1.73484e-10	1.69934e-09
Prkar1b	-2.01712	4.03689	3.5084e-31	1.00465e-29
Hpn	2.01583	2.03454	2.44964e-15	3.47141e-14
Nek10	-2.0118	3.80386	2.94612e-22	5.99233e-21
Slc2a3	-2.00355	2.73381	7.01776e-10	6.50118e-09
Irgm1	-2.00234	3.12816	1.11102e-17	1.76831e-16
Pde1b	1.99677	0.916881	0.00419111	0.0133013
Htr2a	-1.99534	5.83511	4.92895e-83	5.92803e-81
Uchl1	-1.99109	2.75073	6.90892e-12	7.58391e-11
Spink10	-1.99081	3.95631	7.8973e-43	3.15687e-41
D5Ertd615e	-1.98879	1.62021	8.11139e-06	4.61682e-05
Abca6	-1.98143	1.84361	1.76235e-10	1.72262e-09
Cd274	1.9813	0.786118	8.58877e-05	0.000411327
Mgst2	-1.98012	1.08011	0.0117805	0.0325059
2610318N02Rik	-1.98012	0.818214	0.0117805	0.0325059
Vmn2r57	-1.98012	0.197838	0.0117805	0.0325059
Lbp	1.97591	1.34721	1.94019e-06	1.21589e-05
Map3k19	1.97591	1.04259	1.94019e-06	1.21589e-05
Slc45a1	-1.97582	1.47788	1.88991e-07	1.36356e-06
Cd40	1.97317	2.14499	4.58728e-08	3.57446e-07
Zfp418	-1.97121	1.0961	0.00430869	0.0136183
Tm4sf1	-1.96569	5.97046	2.4331e-109	6.47157e-107
Tuba8	-1.96193	0.399019	0.000604108	0.00239548
Cyp4f16	-1.96051	4.14407	3.44178e-28	8.96483e-27
Unc5d	1.95706	5.57827	9.47727e-103	1.95642e-100
44256	1.95704	2.99879	2.8251e-14	3.7178e-13
Cd200	1.95584	1.60879	0.000764011	0.00295004
D330050G23Rik	-1.95315	1.12753	5.08412e-06	3.0025e-05
Nyap2	1.94941	1.31555	7.51847e-08	5.69173e-07
Pyroxd2	1.94703	3.82909	1.75283e-53	8.88036e-52
AI607873	1.94676	1.17295	5.20382e-09	4.4566e-08
Zmynd10	1.93434	0.0749675	0.000142928	0.000652792
Rimkla	1.9338	0.390522	9.30689e-06	5.26047e-05
Adra1a	1.93349	0.986944	6.24688e-07	4.20645e-06
Ccdc78	1.9328	2.09108	5.32124e-15	7.38937e-14
Slc6a17	-1.92772	5.19722	7.76395e-57	4.3475e-55
1700049G17Rik	-1.91643	4.3916	1.0763e-37	3.80725e-36
1110019D14Rik	-1.9151	3.07235	1.83962e-20	3.41987e-19
Pisd-ps2	-1.91284	4.24378	6.79092e-38	2.42701e-36
Rims2	1.91153	5.37039	2.86011e-79	3.04294e-77
Unc13b	1.91127	5.5391	1.64864e-71	1.42514e-69
Trim14	1.91029	1.0962	6.96318e-08	5.29745e-07
Wnt16	-1.90754	3.64423	3.34511e-28	8.72947e-27
Egflam	1.90742	3.24319	2.54241e-38	9.22942e-37
B230217O12Rik	-1.90703	1.6915	4.64863e-08	3.61819e-07
Tnfrsf22	-1.90359	0.952244	0.000985378	0.00371154
Krt19	-1.90359	0.792519	0.000985378	0.00371154
Cyp2c55	-1.89951	1.79264	7.70085e-07	5.09863e-06
Scel	-1.89608	3.2681	0.00263313	0.00888698
4930412C18Rik	-1.89241	0.649149	5.06222e-06	2.99212e-05
Pirb	1.89233	0.264946	0.00127891	0.00469193
Trim30a	-1.8879	1.7362	1.30387e-05	7.22797e-05
B4galnt4	1.88579	0.432876	0.000236501	0.00102831
Map3k6	-1.88469	2.37285	6.77314e-15	9.31206e-14
Serpinb2	-1.88302	3.72711	1.69739e-14	2.27267e-13
Gstt1	-1.88248	1.64896	3.37114e-05	0.000173914
Ccdc60	-1.87586	0.432826	8.75606e-05	0.000418469
Wdr17	1.8717	1.81851	9.97822e-11	9.96453e-10
Kcns3	-1.87046	3.93786	3.69885e-36	1.25537e-34
Acot12	1.86288	1.19297	9.3439e-07	6.09601e-06
Entpd2	1.86029	0.473988	0.000705148	0.00274884
Ttll11	-1.859	5.19798	3.06545e-71	2.60112e-69
Slc37a1	1.85841	0.255553	0.00389866	0.0124878
Dusp2	1.85841	0.473776	0.00389866	0.0124878
Cadm3	1.85841	0.197825	0.00389866	0.0124878
Mir125a	-1.85696	0.513864	0.000601614	0.00238627
AW011738	-1.85201	1.80887	2.83699e-08	2.26811e-07
Alpk1	-1.84412	5.83752	4.48344e-88	5.90576e-86
Slc23a3	1.8414	0.83107	7.30396e-05	0.000354834
Fmod	-1.83764	4.17152	7.51738e-32	2.20282e-30
Hvcn1	-1.83506	3.18804	4.01421e-19	6.94006e-18
Ampd1	-1.83471	1.31549	4.66646e-07	3.22065e-06
4931408D14Rik	-1.83432	1.06958	0.000139814	0.000640109
Pebp4	-1.83432	0.892993	0.000139814	0.000640109
Agrp	1.83329	1.60928	1.45286e-10	1.43737e-09
Tc2n	1.83072	2.13754	7.27454e-10	6.73454e-09
Kcnh7	-1.82999	1.60528	1.27489e-05	7.07298e-05
Bank1	1.82479	0.449415	4.06062e-05	0.000206784
Rsph4a	-1.82295	0.329049	0.00429258	0.0135767
Tbc1d21	-1.82295	0.513793	0.00429258	0.0135767
Cilp	-1.82295	0.346937	0.00429258	0.0135767
Enpp5	-1.82212	3.49718	1.65779e-27	4.1841e-26
AW046200	-1.82204	2.38619	1.00799e-11	1.09517e-10
4933408B17Rik	-1.81804	2.09081	2.65778e-09	2.36245e-08
Nudt7	-1.80896	3.01916	3.73549e-17	5.79211e-16
6030407O03Rik	-1.80768	3.05968	9.34367e-20	1.67399e-18
Mmp12	1.80694	0.759494	0.0121272	0.0332867
Scn8a	1.80694	0.905153	0.0121272	0.0332867
Pax6	1.80694	0.127425	0.0121272	0.0332867
Depdc7	1.80552	1.41181	2.66169e-07	1.8908e-06
Plppr1	1.80401	3.77824	8.89116e-53	4.42351e-51
Mreg	-1.80298	0.381837	0.000965162	0.0036493
Adgrf2	-1.80298	0.355706	0.000965162	0.0036493
Tnnt3	1.80288	1.68835	3.28887e-09	2.88266e-08
Dcc	-1.80017	6.26888	4.82963e-96	8.24674e-94
Lgals9	-1.79932	2.81348	2.3675e-13	2.91584e-12
Rtn1	1.79915	2.14025	8.11953e-16	1.18088e-14
Siglecg	1.79611	2.91495	3.49279e-14	4.57903e-13
Fam229b	-1.79355	2.59833	2.48826e-10	2.40161e-09
Ccdc158	-1.79321	0.521681	0.0117431	0.0324449
Acot6	-1.79155	0.753093	0.000222126	0.00097331
Proz	1.79128	1.41201	1.04313e-09	9.55465e-09
Inpp5d	1.78351	1.81144	0.000635748	0.00250442
Plscr4	1.78131	2.69172	2.08613e-23	4.50128e-22
Ly96	-1.78015	4.13109	1.33784e-26	3.29247e-25
Kcnh5	1.77983	1.19799	2.39729e-12	2.74705e-11
Trat1	-1.7793	0.246108	0.00257104	0.00872212
Hist1h2bl	-1.7793	0.158063	0.00257104	0.00872212
2900057B20Rik	1.77698	0.12742	0.00649938	0.0195038
Apcdd1	1.77621	3.92922	5.05281e-48	2.23276e-46
Mt1	-1.77573	2.31553	1.40247e-13	1.76181e-12
Hcn4	1.77531	0.407577	3.64093e-05	0.000186718
Ryr2	1.77247	3.53243	2.93293e-34	9.39013e-33
Dctn6	-1.77216	4.43291	7.02977e-07	4.68798e-06
Wdr86	-1.77211	0.598077	0.000582264	0.00231683
Lipg	-1.77211	1.63089	0.000582264	0.00231683
Nme5	-1.77211	0.739624	0.000582264	0.00231683
Moxd1	1.77012	4.54972	2.01528e-43	8.19804e-42
Efhb	1.7657	1.79911	5.24233e-10	4.90241e-09
Tmem126b	-1.76501	2.33811	2.44231e-09	2.17933e-08
3830408C21Rik	-1.76433	2.27891	5.35544e-14	6.94851e-13
Rsph14	1.7603	2.08052	3.27628e-16	4.86204e-15
Rps6kl1	1.75706	1.34236	0.000191941	0.000851971
Tmem160	1.75627	0.329069	0.00350306	0.0113815
Cfap77	-1.7469	0.301974	0.00153859	0.00552591
Cacna1s	-1.74591	0.598036	0.00694295	0.0206423
Tigd3	-1.74591	0.922842	0.00694295	0.0206423
Plekhn1	-1.74576	3.47665	1.13955e-19	2.03632e-18
1700007K13Rik	1.74079	1.38203	4.14309e-09	3.6017e-08
Mctp2	1.7402	4.19462	1.97814e-28	5.22131e-27
Gstm4	1.7381	0.998103	1.93135e-06	1.21145e-05
Synpr	1.73659	3.62894	5.38717e-18	8.78656e-17
Apol6	-1.73622	2.27685	7.34671e-16	1.07413e-14
Gnaz	1.73303	2.03179	1.26617e-15	1.82042e-14
BC051019	1.73194	0.837392	3.22962e-05	0.000167174
Perm1	-1.72905	2.24345	9.85858e-08	7.32299e-07
Rnf223	1.72586	0.56808	1.78853e-05	9.65917e-05
Tub	1.72586	1.39488	1.78853e-05	9.65917e-05
Slc16a12	1.71798	1.29745	2.0538e-09	1.83977e-08
Gldc	1.71316	2.765	1.74751e-15	2.49688e-14
Gria2	-1.7129	0.663377	0.00410883	0.0130702
Pgbd1	-1.71058	0.772976	0.000127586	0.000589391
Abca8a	-1.70968	0.86241	4.31343e-06	2.58488e-05
Lsmem1	-1.7081	3.49872	3.34199e-23	7.13319e-22
Ano5	1.70788	3.77588	2.43161e-32	7.31123e-31
Cdh8	-1.70781	4.99742	8.6606e-66	6.04973e-64
Acss1	-1.70495	1.6953	6.29595e-07	4.23537e-06
Hook1	-1.70199	0.824705	0.000551654	0.0022071
Ndst3	-1.69996	4.71812	1.31795e-46	5.69643e-45
Lrp2	-1.69796	4.7024	2.46738e-15	3.49298e-14
0610037L13Rik	-1.69781	4.3156	9.28508e-37	3.19458e-35
Fst	-1.69624	4.73855	3.30878e-42	1.30753e-40
Gm4532	-1.69524	0.106691	0.019125	0.0490119
Fam24a	-1.69524	0.106648	0.019125	0.0490119
Troap	-1.69524	1.46573	0.019125	0.0490119
Ntf3	-1.69358	3.74355	2.08792e-19	3.69284e-18
Misp	1.69217	1.35143	5.1369e-08	3.97141e-07
Kazald1	1.69067	0.719255	0.0107326	0.0300308
Ret	1.68992	4.72193	2.03225e-56	1.12884e-54
Lgals3bp	1.68907	4.66466	1.27918e-66	9.263e-65
Chmp4c	1.68681	1.77625	9.00016e-09	7.50791e-08
Hexim2	1.6831	0.137735	0.0057253	0.0174574
Ttyh1	1.68251	2.17813	1.58384e-09	1.43197e-08
Zfp239	1.67792	2.09907	1.57075e-10	1.54516e-09
Abcc2	1.6776	0.117135	0.003077	0.010174
Esr2	1.67694	2.14538	8.8223e-11	8.84853e-10
Mrpl43	-1.67234	1.38616	0.000198524	0.000878934
Jph3	-1.66999	1.85918	5.28852e-08	4.08178e-07
Ifi30	-1.66986	1.89851	0.00144752	0.00523825
Grin2d	1.66876	3.59989	4.3294e-23	9.19815e-22
Pkp1	-1.6687	1.78629	3.58261e-07	2.49628e-06
Tslp	1.66749	0.940757	0.000492783	0.00199173
Aox2	1.66749	0.0643161	0.000492783	0.00199173
Nmnat3	-1.66441	4.53785	2.89078e-60	1.75361e-58
Trim71	1.66224	3.83498	1.65187e-17	2.60513e-16
Noct	-1.65942	9.20471	1.00356e-166	7.30536e-164
Cadm2	-1.65614	6.7926	1.14712e-103	2.60095e-101
Dnajc6	1.65374	1.84987	2.24902e-07	1.60922e-06
2810025M15Rik	1.65329	1.8023	1.25494e-07	9.22886e-07
4930412B13Rik	1.65325	3.83355	7.22401e-31	2.04745e-29
2010310C07Rik	1.65095	1.83734	2.15095e-09	1.9243e-08
Mrfap1	-1.64927	2.45098	6.19731e-06	3.59392e-05
Rnls	1.64924	4.31464	7.41906e-49	3.35337e-47
Apoe	1.64697	2.52974	6.9746e-17	1.06357e-15
Fmn2	-1.64513	3.3432	3.22938e-13	3.94921e-12
4930481A15Rik	-1.64302	1.29273	0.000514186	0.00206976
Mx2	1.6352	3.83754	8.44183e-40	3.19014e-38
A930005H10Rik	-1.63306	0.843702	0.000307316	0.00129944
Tmem141	1.631	1.251	3.65453e-06	2.21014e-05
Stac	-1.62994	4.16982	3.08284e-19	5.37012e-18
C1s1	-1.6288	1.95821	1.12043e-13	1.41782e-12
Cadps	1.62788	1.11188	3.88912e-05	0.000198489
Tsnaxip1	-1.62776	0.843515	0.00382973	0.0123077
Sfi1	1.62673	4.42605	1.50802e-19	2.68781e-18
Map3k7cl	-1.62527	4.32787	1.30496e-17	2.0722e-16
4930447K03Rik	1.62419	0.137798	0.000233558	0.00101711
Trhde	-1.62126	3.02764	1.57655e-14	2.12114e-13
Vstm2b	-1.61752	2.09593	0.000110309	0.000519119
Malrd1	-1.61588	0.498026	0.00226006	0.00778166
Pradc1	-1.61588	0.656244	0.00226006	0.00778166
Rab11fip4	1.6156	1.70568	9.428e-08	7.02958e-07
Mir6346	1.61505	0.0534972	0.00266089	0.00896098
Gm14164	1.61505	0.117102	0.00266089	0.00896098
Plek	-1.61163	2.62016	1.13218e-07	8.35158e-07
Ipcef1	1.61117	0.373266	0.00494836	0.0153696
Mrps17	-1.611	3.48236	4.5148e-24	9.9592e-23
Kcnj14	1.60743	1.92287	3.15633e-06	1.92229e-05
Pex5l	1.60548	1.63131	4.45554e-09	3.85153e-08
Adam8	-1.60539	3.11272	1.66845e-12	1.93756e-11
Sft2d2	-1.60259	4.1846	1.05431e-36	3.61842e-35
2310001H17Rik	1.60023	2.04269	1.84347e-13	2.29703e-12
St6galnac5	-1.59911	1.72599	4.65309e-07	3.21303e-06
Fam196b	1.59888	1.24099	0.0175394	0.0455306
Fpr1	1.59888	0.952193	0.0175394	0.0455306
4632428C04Rik	1.59888	0.178002	0.0175394	0.0455306
Mab21l2	-1.59702	0.465815	1.44369e-05	7.92996e-05
Hcn1	-1.59602	5.67717	2.2367e-82	2.66688e-80
Fam185a	-1.59136	6.54998	3.89438e-98	7.08726e-96
Lzts3	1.59009	1.99818	6.85442e-09	5.78744e-08
Slc29a4	-1.58742	1.13245	0.000282338	0.00120451
Capn11	-1.58742	0.874606	0.000282338	0.00120451
Efcab8	1.58639	3.0668	2.4513e-14	3.2382e-13
Rbm46	1.58574	1.65633	2.71524e-06	1.66909e-05
0610040J01Rik	1.58324	3.41053	1.80321e-28	4.77782e-27
Tinag	-1.57928	1.39067	7.02952e-07	4.68798e-06
A430078I02Rik	1.57914	2.17583	4.98549e-11	5.1153e-10
Vipr2	-1.57827	0.217329	0.0176885	0.045849
Btbd16	-1.57827	1.10666	0.0176885	0.045849
Slfn10-ps	-1.57827	0.670527	0.0176885	0.045849
Gm19689	1.57511	2.22199	4.02081e-07	2.78617e-06
Klf5	1.57494	4.42294	1.27935e-58	7.40361e-57
Kcp	-1.57245	2.71956	4.38775e-10	4.13117e-09
Rasgef1a	1.57198	0.373233	0.001233	0.00454643
Olfr1318	1.56531	1.82782	1.35491e-10	1.34143e-09
Cys1	1.56409	1.68805	0.00227549	0.00782894
Gm10037	-1.55981	0.824658	0.00350389	0.0113815
Upk1a	-1.55347	0.880753	0.00122098	0.00450449
Fbxl13	-1.55334	6.81195	2.78328e-91	3.92812e-89
Cerkl	1.55294	1.79274	2.06524e-10	2.00734e-09
Nudt13	-1.55195	2.78953	1.74145e-12	2.01725e-11
Ptgir	1.55125	0.874808	1.10768e-06	7.16909e-06
Klhl1	-1.55114	0.407501	0.000724432	0.00281134
Lrriq1	1.54989	1.35125	9.18618e-08	6.86408e-07
Tpd52	-1.54926	6.11729	9.81041e-77	9.55548e-75
Col9a2	1.54717	1.8055	1.98911e-06	1.24542e-05
Hist1h3d	-1.54486	0.575602	9.19546e-05	0.000437654
Dusp27	-1.54377	1.59786	5.514e-05	0.000273642
Sh2d4a	1.54302	2.48234	1.5131e-11	1.62482e-10
Nkain4	1.54255	1.5678	4.44142e-05	0.00022444
Atp5g1	-1.54043	3.2557	8.22831e-14	1.05278e-12
Lrrc17	-1.53983	6.64628	4.99103e-86	6.27554e-84
Prom1	-1.53784	2.32244	5.81734e-07	3.94023e-06
Ctnna2	1.53771	9.38626	6.34189e-186	5.48217e-183
D030047H15Rik	1.53706	2.20764	6.58927e-09	5.57408e-08
Itgb6	1.53614	1.28362	8.04619e-05	0.000387894
Bend6	1.53593	4.59344	2.94243e-31	8.4962e-30
Pde11a	-1.53368	2.04263	2.01006e-10	1.95507e-09
Trpc4	1.53295	2.62332	0.00104843	0.00392232
Scd4	1.52816	1.29756	2.50754e-07	1.7868e-06
Gpr156	1.52697	2.07245	7.23842e-11	7.29698e-10
Gm11201	1.52318	2.56246	2.98741e-12	3.39794e-11
Rnu3a	1.52303	5.01239	1.01856e-49	4.74335e-48
Gm5820	-1.52294	3.06141	3.48519e-12	3.935e-11
44265	-1.51968	2.15765	1.93098e-07	1.39029e-06
A230108P19Rik	-1.51968	1.65985	1.93098e-07	1.39029e-06
Stpg2	-1.51911	2.67014	5.26229e-07	3.59954e-06
Nsun3	-1.51815	4.1623	4.47785e-29	1.20259e-27
Slc4a10	-1.51808	2.82368	2.37925e-06	1.47435e-05
Slit1	-1.51619	1.30189	1.80004e-05	9.71373e-05
Cib2	1.51232	1.39905	6.82829e-05	0.000333247
Tfpi2	1.51232	0.880697	6.82829e-05	0.000333247
Tmem223	-1.51121	1.90484	0.000389353	0.00161039
Glra1	-1.5099	1.18782	0.000654321	0.00257246
Dock2	1.50799	2.70599	0.00356968	0.0115491
Pzp	1.50799	0.364518	0.00356968	0.0115491
Trim15	-1.50451	2.31547	2.84245e-12	3.24105e-11

## Sheet: B6xSPRET
Gene	log2 (wild/B6 counts)	log2 (CPM)	p-value	FDR
Meg3	-11.0733	10.0649	1.99801e-307	6.90861e-304
6430411K18Rik	-11.0245	3.62785	3.63523e-103	2.41726e-101
Rian	-10.9072	11.105	0	0
Gpr149	-10.0252	2.70697	7.07086e-77	2.42672e-75
Mirg	-10.0176	8.15202	1.80025e-222	1.24496e-219
Igf2os	9.98712	2.44522	7.20672e-75	2.33434e-73
Olfr1033	-9.58258	1.30602	8.28407e-64	2.06445e-62
Slc22a1	-9.5093	2.02853	9.02366e-63	2.18958e-61
Antxrl	-9.40543	2.78617	4.71958e-59	1.06487e-57
Nlrp5-ps	-9.37825	4.46112	3.88745e-62	9.3023e-61
Snhg14	9.3542	1.79251	9.13182e-60	2.09456e-58
Mir758	-9.31515	2.31088	2.3318e-58	5.19342e-57
Mir3070a	-9.17213	2.02589	2.26573e-54	4.7266e-53
Rtl1	-9.00092	6.1642	1.08265e-179	3.94056e-177
Mir134	-8.8646	0.481671	2.94588e-44	5.03018e-43
Mir668	-8.83492	0.457293	2.17081e-43	3.65707e-42
Cdkn1c	-8.66539	1.81178	9.21421e-39	1.36887e-37
Mir1197	-8.58446	1.93481	9.77544e-37	1.37542e-35
Zim1	-8.58223	6.05749	8.11005e-198	4.48681e-195
Mir323	-8.56048	1.84987	3.70705e-36	5.13235e-35
Igf2	8.52317	6.66601	1.96649e-193	8.77372e-191
Mir493	-8.51128	1.34673	5.33328e-35	7.14773e-34
Clcn4	-8.50987	3.93151	5.08349e-117	4.88262e-115
Mir654	-8.49872	1.96394	1.03878e-34	1.38281e-33
Mir666	-8.47325	2.01776	3.94127e-34	5.19158e-33
Mir667	-8.46035	2.17814	7.67744e-34	9.98933e-33
Mir434	-8.36665	0.855995	8.18047e-32	1.01112e-30
Mir376c	-8.29579	1.8747	2.29941e-30	2.74639e-29
Mir682	-8.26644	0.0854275	8.73574e-30	1.02829e-28
Mir673	-8.07658	1.35567	2.63888e-26	2.81189e-25
1700048O20Rik	-8.04235	1.74645	1.0042e-25	1.04665e-24
Mir494	-7.79761	0.415915	5.99335e-22	5.49695e-21
Plagl1	7.75264	7.81738	1.26298e-192	5.29341e-190
Adgrl4	7.68113	2.41508	1.34445e-103	9.07074e-102
4930539N22Rik	-7.61854	1.84946	5.2077e-67	1.41508e-65
H19	-7.548	7.44091	9.06118e-191	3.48126e-188
Mir300	-7.47731	0.811906	7.11604e-18	5.50151e-17
Gm10560	-7.45146	1.53741	1.39223e-17	1.06093e-16
Peg10	7.39808	3.87955	3.84784e-117	3.72165e-115
Peg12	7.37551	0.15802	3.49772e-17	2.62348e-16
Grb10	-7.37183	10.4177	0	0
Ralyl	-7.18788	5.18249	5.34588e-162	1.4219e-159
Krt20	-7.16378	0.465772	1.15514e-14	7.59354e-14
Sgce	7.00213	5.58721	9.5159e-156	2.23075e-153
Mir540	-6.92171	1.59075	1.29338e-12	7.56397e-12
Fabp12	-6.88356	0.620253	2.54076e-12	1.46023e-11
Mir882	-6.84437	0.490014	4.99285e-12	2.82322e-11
Hist1h3e	-6.80408	0.513918	9.81494e-12	5.4606e-11
Mir543	-6.80408	0.656394	9.81494e-12	5.4606e-11
Mir3070b	-6.77613	1.31077	4.21098e-43	7.03406e-42
Ifi202b	6.71446	3.46644	9.60607e-127	1.2302e-124
A230057D06Rik	6.66371	5.51914	5.03794e-194	2.32266e-191
Chodl	-6.64654	2.79592	2.21427e-39	3.35438e-38
Mir1193	-6.58384	0.0855869	2.89901e-10	1.46336e-09
Cntn2	6.55652	5.22323	1.07608e-192	4.651e-190
Mir382	-6.53545	1.11202	5.71391e-10	2.82146e-09
8430436N08Rik	-6.51561	1.68805	6.00182e-36	8.26804e-35
Mest	6.41455	6.78451	2.91885e-192	1.18737e-189
Mir299a	-6.3797	0.346919	4.39003e-09	2.0226e-08
Ndn	6.31312	1.00378	1.33398e-30	1.60298e-29
Kcnq1ot1	6.27771	9.12102	2.63375e-255	5.20392e-252
Kcnq1	6.20977	9.13426	1.83376e-255	4.22711e-252
A330076H08Rik	6.20893	3.59909	3.17481e-117	3.0923e-115
Mir376a	-6.20508	0.506004	3.39336e-08	1.44366e-07
Hist1h2ak	-6.20508	0.127467	3.39336e-08	1.44366e-07
Sycp1	6.11026	0.590408	3.76498e-45	6.58325e-44
Fam19a1	-6.08151	3.98509	2.9191e-105	2.0599e-103
Tnfaip8l3	-6.0757	1.83129	1.33208e-07	5.35427e-07
Gm16070	-6.00638	2.10446	2.64313e-07	1.02943e-06
Slc17a6	5.98493	0.5138	2.37161e-24	2.38039e-23
Skint6	5.83499	1.88027	7.17377e-81	2.74089e-79
Wdr72	-5.80983	3.6353	5.70441e-73	1.76901e-71
Kcnq3	5.70359	5.90591	5.16065e-207	3.10335e-204
Dlk1	5.63407	4.26194	8.68791e-78	3.04209e-76
4930412C18Rik	-5.56408	0.649149	1.55096e-18	1.23071e-17
Gm14139	5.55521	0.11696	2.78629e-30	3.31931e-29
Nxph1	-5.50139	0.612989	1.6585e-05	5.17455e-05
Sbsn	-5.50139	0.441177	1.6585e-05	5.17455e-05
A430093F15Rik	5.42235	0.691606	1.66284e-27	1.8399e-26
Ptpn20	5.40842	0.457409	4.13479e-38	6.00717e-37
Peg3	5.40274	8.18704	5.79243e-238	5.00175e-235
Ly6a	-5.39693	1.38202	3.32683e-05	9.98771e-05
Rnf125	-5.37558	1.04257	2.92212e-16	2.1039e-15
Vmn2r29	-5.3717	0.489708	3.17637e-38	4.64402e-37
Pou6f2	5.3142	2.37914	4.33832e-87	1.8869e-85
Gbp9	-5.2843	0.705598	6.68989e-05	0.000192131
1700025K24Rik	5.18778	0.663438	3.36638e-23	3.23786e-22
Mir329	-5.16213	0.346915	0.000134913	0.000370014
Peg3os	5.15346	4.76143	1.1892e-126	1.50897e-124
Etnppl	5.13373	1.13743	4.12248e-57	8.99339e-56
Nptx2	-4.99899	2.05871	2.39761e-45	4.21364e-44
Myo7a	-4.96706	6.35655	1.23837e-143	2.34628e-141
Mir665	-4.88155	0.217369	0.000554616	0.00137842
9030624G23Rik	-4.83706	0.13751	1.14424e-25	1.19082e-24
Mt2	-4.8252	2.22242	2.71874e-18	2.14017e-17
Stat4	4.69444	0.590454	1.07133e-34	1.42476e-33
Fam84a	4.62867	0.684583	3.93845e-27	4.29257e-26
Lncbate1	4.61936	0.0856939	0.00144395	0.00334062
Gm4349	4.61434	0.473854	4.70869e-21	4.1614e-20
LOC105246056	4.60739	2.23356	7.33118e-81	2.78565e-79
Pld5	-4.59371	3.88366	2.34829e-83	9.44161e-82
Mas1	4.55392	2.13799	4.21425e-31	5.13544e-30
C130046K22Rik	-4.55245	2.0065	4.00056e-32	4.98484e-31
4930447K03Rik	-4.53289	0.137798	0.00232555	0.00520548
1700010K23Rik	-4.53289	0.905158	0.00232555	0.00520548
Tnfsf4	4.48168	2.34828	2.10679e-89	9.71303e-88
Atp6v0c-ps2	-4.47339	0.40747	3.98136e-14	2.55527e-13
Selenbp2	4.45076	2.50694	2.09691e-94	1.10275e-92
Rhag	-4.39142	0.147848	2.68238e-13	1.64305e-12
Trank1	4.35802	1.92259	5.01771e-68	1.40771e-66
Dner	-4.34623	4.62905	2.52341e-98	1.46644e-96
Ccdc60	-4.30639	0.432826	8.94932e-08	3.65666e-07
4930447C04Rik	-4.30377	0.958107	3.92667e-17	2.94202e-16
Pde6a	4.29853	0.236522	1.48105e-16	1.07869e-15
Abca16	4.2574	1.07468	3.04947e-50	5.87426e-49
Mir296	4.23611	0.246143	2.838e-07	1.09951e-06
Pm20d2	4.22614	0.922995	1.15846e-15	8.07594e-15
Gm10635	-4.22027	2.70206	2.87388e-46	5.10908e-45
Zdbf2	4.21351	4.58732	1.38755e-102	9.09534e-101
Cbr2	-4.21203	1.46596	1.20063e-11	6.62912e-11
Tcerg1l	4.19197	1.9315	1.90918e-65	4.97286e-64
4931423N10Rik	-4.17984	0.178027	2.25767e-11	1.21596e-10
Slc44a5	4.17702	1.85303	4.6689e-39	6.99627e-38
Nespas	4.17271	5.2903	7.22194e-133	1.06262e-130
Usp29	4.16986	3.55757	1.50895e-89	7.02702e-88
Slc22a18	-4.16733	2.02061	1.04614e-23	1.0291e-22
Moxd1	-4.16721	4.54972	1.29279e-56	2.79821e-55
C330022C24Rik	4.14942	0.779301	3.51513e-38	5.12306e-37
Paqr5	-4.11809	2.55646	2.08252e-50	4.02843e-49
Myo3a	-4.10456	0.398809	1.85893e-26	1.99001e-25
Selenbp1	4.10329	1.8146	1.36307e-69	3.95233e-68
Trpc4	4.10281	2.62332	1.52639e-83	6.17295e-82
Alpk2	4.09821	2.07172	1.79073e-75	5.93948e-74
Nos1	-4.07218	0.117163	0.0100637	0.019825
Dll1	-4.07218	0.0750373	0.0100637	0.019825
Galnt18	-4.02638	9.39666	1.49521e-250	2.29781e-247
Dnah7b	-4.02103	4.28593	4.65644e-92	2.30836e-90
Crym	4.01503	0.597904	1.06806e-30	1.28679e-29
Gm8579	4.01312	0.567807	4.1661e-34	5.47731e-33
Tnni3k	-4.00716	3.20518	1.59854e-66	4.29309e-65
Cr2	4.00676	3.19142	2.58114e-110	2.09998e-108
Mill2	-3.99996	3.03324	1.96637e-31	2.41321e-30
Skap1	-3.97334	3.24908	4.54372e-82	1.77526e-80
Adh7	3.96434	2.08063	4.76164e-06	1.59554e-05
Olfr267	-3.94858	0.117136	4.28497e-06	1.44339e-05
Ptprq	3.91835	5.90973	2.10576e-195	1.0787e-192
Adgrf2	-3.89261	0.355706	3.43736e-09	1.5943e-08
Bhlhe22	3.89191	0.329106	6.01097e-09	2.73479e-08
Ttpa	-3.85233	0.998209	6.41765e-09	2.91025e-08
Gm38403	-3.85233	0.940733	6.41765e-09	2.91025e-08
Abca6	-3.78819	1.84361	2.20506e-23	2.13424e-22
Foxf1	-3.78308	0.246048	1.85642e-11	1.00849e-10
Erich6	-3.78308	0.805527	1.85642e-11	1.00849e-10
Samd3	3.74455	0.805389	3.32586e-27	3.63349e-26
Enpp3	3.72677	1.99818	1.78915e-29	2.08649e-28
Taco1	3.69742	2.55589	2.86724e-79	1.03273e-77
Gsto1	-3.68635	7.02214	2.24782e-138	3.8862e-136
9330102E08Rik	-3.67891	0.568049	7.71566e-08	3.17416e-07
Srrm4os	-3.66986	0.785967	1.64565e-18	1.30436e-17
1700007F19Rik	-3.65841	0.952424	2.15205e-10	1.09551e-09
Gm20756	3.65521	2.35063	5.92785e-77	2.03951e-75
Slc15a2	-3.64875	0.583235	5.56305e-05	0.000162052
Pappa2	3.62576	3.38475	1.42016e-108	1.10618e-106
Spock3	-3.60862	5.06805	1.74986e-81	6.7984e-80
Mogat2	-3.5837	0.407607	2.65596e-07	1.03361e-06
Gm16432	-3.5559	2.56098	2.02395e-14	1.31671e-13
Tigd3	3.52419	0.922842	5.95483e-27	6.44454e-26
1700061I17Rik	-3.51172	0.928889	6.69528e-14	4.24782e-13
Cybrd1	3.49078	1.66692	6.42557e-37	9.08712e-36
Tmem132b	-3.4878	0.598046	2.3086e-11	1.24194e-10
Stmn2	-3.48176	0.246115	9.09099e-07	3.322e-06
S100a7a	-3.47168	0.18803	0.000199133	0.000531702
Aqp1	3.46902	2.30002	5.71111e-13	3.42394e-12
Serpina3g	-3.46537	2.29745	3.44715e-22	3.19127e-21
Lrrc72	3.46079	0.188033	1.2264e-08	5.42275e-08
Serpinb1a	3.45542	2.52346	1.26595e-64	3.24848e-63
Bdh2	3.4495	3.69425	4.3302e-77	1.49354e-75
Kynu	3.43176	0.449275	1.01872e-18	8.1681e-18
Sema5b	3.43116	2.91654	5.09589e-75	1.66229e-73
Rab3b	-3.43045	0.940711	7.63857e-11	4.02166e-10
Mt1	-3.42207	2.31553	1.10355e-27	1.22794e-26
Rbpjl	3.41455	0.963928	1.93471e-18	1.52996e-17
Impact	3.37628	7.33658	6.38913e-174	2.2092e-171
Mannr	-3.37043	1.86868	2.36697e-12	1.36406e-11
Rtn4r	-3.37009	2.2415	2.18844e-16	1.58806e-15
A530072M11Rik	-3.35653	2.66689	6.80879e-42	1.10278e-40
Tmcc3	-3.33097	6.31761	3.10828e-158	7.41218e-156
Sod3	-3.3309	2.62818	4.98129e-08	2.09348e-07
Ntf3	-3.31757	3.74355	5.69559e-92	2.81342e-90
C1qtnf2	-3.31392	2.04565	5.68627e-06	1.88873e-05
Kcnd2	-3.31187	8.92891	1.19348e-237	9.17059e-235
Plac8	-3.30788	2.69307	4.37364e-55	9.2213e-54
Thsd7b	3.30661	4.37553	2.03034e-47	3.66602e-46
Trim30a	-3.30472	1.7362	3.79522e-21	3.37567e-20
Ecel1	3.29451	1.74977	5.76606e-22	5.29551e-21
Stmn4	3.29323	2.06627	2.01334e-69	5.82564e-68
0610031O16Rik	3.29116	2.29085	1.00304e-05	3.23455e-05
Ifi44	-3.28946	1.08037	9.05533e-08	3.69343e-07
Hist1h2ad	-3.28946	0.28358	9.05533e-08	3.69343e-07
Ifi204	3.27383	1.99195	3.83657e-64	9.68314e-63
Cilp	-3.26981	0.346937	0.000708727	0.00172851
Tnfsf13b	3.26736	2.22189	3.57781e-57	7.8175e-56
Lrrc9	-3.25333	0.168127	1.04373e-05	3.35639e-05
Gapdhs	-3.25222	4.24628	1.91159e-66	5.12388e-65
Serpina3n	3.24813	0.187912	3.23678e-14	2.08514e-13
6030407O03Rik	-3.23289	3.05968	3.8524e-67	1.05094e-65
4933405E24Rik	3.23003	0.217245	1.11692e-15	7.80604e-15
5430437J10Rik	-3.2096	1.6386	4.82935e-09	2.21395e-08
Gstt1	3.20954	1.64896	1.22693e-41	1.97321e-40
AY512931	-3.19331	0.641961	2.42548e-12	1.39604e-11
Tmc2	-3.19009	0.0534711	1.91171e-05	5.90988e-05
Cntnap3	-3.18988	2.75965	6.70276e-41	1.05829e-39
Slc24a2	-3.17509	2.1981	8.68066e-09	3.89307e-08
Fam110c	-3.16958	0.71922	4.32792e-12	2.45527e-11
Fpr1	3.16782	0.952193	7.00462e-26	7.32836e-25
Stk33	-3.15756	0.465726	2.57235e-10	1.30227e-09
Hfe	-3.15718	0.147977	0.00133355	0.00310615
Ovgp1	-3.14547	0.940663	7.71262e-12	4.31177e-11
E030011O05Rik	-3.14336	4.09712	1.09686e-91	5.36065e-90
Pla2r1	-3.13827	3.74713	6.36836e-70	1.85824e-68
Col9a1	3.12726	1.45759	6.82146e-22	6.24819e-21
A530065N20Rik	3.12201	1.17322	3.79835e-08	1.61249e-07
Adamts18	-3.11135	3.57405	4.22925e-78	1.49603e-76
Pard6a	-3.11066	0.137726	9.70893e-07	3.53008e-06
Vstm2b	3.08903	2.09593	1.37298e-51	2.70508e-50
Foxd1	3.0873	2.50295	1.87692e-80	7.03514e-79
Alk	3.08564	4.35039	5.66447e-90	2.6739e-88
9430041J12Rik	3.07761	0.178102	2.23781e-06	7.80217e-06
She	3.07212	0.274364	7.25548e-05	0.000206951
Nfkbid	-3.06887	1.09096	1.45798e-09	6.99458e-09
Kcnd3	3.0625	4.26557	1.97317e-107	1.47518e-105
Spink10	-3.05873	3.95631	4.01702e-61	9.40092e-60
Ptger3	3.05465	0.911025	1.45918e-10	7.54184e-10
Lrrc2	3.05424	0.449255	1.23994e-17	9.47489e-17
Lipo3	-3.03501	0.946681	0.00250403	0.00557253
Klhl30	3.03232	1.6703	5.83583e-42	9.48477e-41
Mx1	3.02168	0.47395	4.24286e-06	1.4299e-05
Tnfaip2	-3.01586	3.5646	4.50545e-50	8.64284e-49
Igfbp2	3.01015	6.13744	9.02957e-170	2.90437e-167
Tuba8	-3.00656	0.399019	4.59671e-09	2.11079e-08
Clec9a	2.99386	0.117126	2.53179e-07	9.86956e-07
Lyz2	-2.99296	0.656287	3.80253e-13	2.30771e-12
Lrrc3b	-2.99155	2.74857	2.49652e-73	7.86546e-72
Hist1h2bg	-2.989	0.568064	1.58525e-07	6.32043e-07
Gm12709	2.98198	1.35141	3.13592e-11	1.67787e-10
3632451O06Rik	-2.98045	2.64051	1.79721e-18	1.42285e-17
Ret	-2.97563	4.72193	3.68688e-52	7.36897e-51
Cxcl17	2.97423	1.17804	5.81216e-19	4.69556e-18
Pip5kl1	2.9721	0.0961307	1.95535e-12	1.13252e-11
Trp53cor1	-2.96933	3.83833	6.62386e-61	1.53974e-59
Grhl3	2.96729	3.11453	4.68241e-62	1.11659e-60
Rgs7bp	2.95769	4.49528	9.49925e-62	2.24588e-60
Best3	2.95612	2.79028	9.29221e-73	2.86876e-71
Onecut2	2.95416	1.32436	8.54514e-34	1.10766e-32
Kbtbd11	-2.94144	1.73981	1.43879e-08	6.33481e-08
Syndig1	-2.9327	6.33539	1.67078e-86	7.15433e-85
Arhgef16	2.9319	2.38628	2.07327e-24	2.08397e-23
Cyp4f37	2.91591	1.17785	4.13353e-30	4.89896e-29
C130060C02Rik	-2.9091	3.0403	2.47699e-22	2.30857e-21
Dhrs9	-2.90881	3.18	5.41925e-16	3.8497e-15
Hist1h2bl	-2.90512	0.158063	0.000209798	0.000557497
Rbpms2	-2.9013	4.27292	1.51802e-91	7.34119e-90
Kcnh5	2.90036	1.19799	3.21635e-09	1.49833e-08
Olfr78	2.90036	0.73289	3.21635e-09	1.49833e-08
Myrip	2.8997	0.301908	1.22191e-11	6.73587e-11
Angptl6	-2.87923	2.48816	8.7937e-17	6.45914e-16
Slc25a34	2.8792	0.449294	8.71908e-14	5.49652e-13
Sfrp2	-2.8791	2.28628	2.29818e-09	1.08485e-08
A630020A06	2.87721	0.88692	1.39452e-12	8.13482e-12
Scel	2.87625	3.2681	4.168e-97	2.35296e-95
Scd3	-2.86925	0.236441	5.78898e-13	3.46871e-12
Hist1h4c	-2.86461	1.62406	8.83382e-07	3.23315e-06
Kcns3	-2.85978	3.93786	2.53621e-65	6.5813e-64
Inhbb	-2.85795	0.283497	2.09062e-10	1.0662e-09
Serpina3i	2.85501	1.41603	4.58657e-18	3.5739e-17
Pzp	2.85322	0.364518	1.64728e-06	5.83746e-06
Avpr1a	2.85286	1.56033	1.36964e-22	1.29307e-21
Ntm	2.85129	2.73276	1.72151e-47	3.11244e-46
Henmt1	-2.85063	0.246117	1.79113e-05	5.56326e-05
Ankrd6	-2.84502	3.67307	2.63783e-63	6.49178e-62
Fam26e	-2.82412	0.36457	0.000378997	0.000970184
Sgca	-2.82412	0.274336	0.000378997	0.000970184
Tmem150cos	2.80749	0.95225	2.00109e-19	1.65138e-18
Ly6e	-2.80704	2.31102	1.74501e-22	1.63851e-21
Sult4a1	2.8004	1.47773	3.36435e-32	4.20346e-31
A630023A22Rik	-2.79297	4.70799	2.30773e-75	7.61772e-74
Rab6b	-2.78497	2.70356	6.80914e-42	1.10278e-40
Cdh20	2.78286	0.0961639	2.23035e-09	1.05391e-08
Sntg1	-2.78187	1.33342	1.02068e-19	8.55577e-19
Wdr27	2.77766	2.56749	1.52307e-64	3.87235e-63
Tspan11	2.77469	5.30014	2.90609e-76	9.80346e-75
Ankdd1b	2.77058	2.12962	5.87902e-51	1.14848e-49
Cd80	-2.77016	3.76849	8.78935e-61	2.03287e-59
Zfp558	2.76995	3.89394	1.88139e-87	8.23467e-86
C1s1	-2.76008	1.95821	3.24408e-18	2.54214e-17
Lhfpl3	-2.75951	1.90494	1.33133e-23	1.29674e-22
Drc1	2.75637	1.14776	1.31975e-23	1.28636e-22
Gm6093	-2.75443	0.691784	0.00876244	0.0174857
Slfn5	2.74662	0.355772	0.00994698	0.019623
Aldh1a7	2.74442	0.649048	2.79367e-20	2.39401e-19
Cntn6	-2.74353	1.49787	4.81459e-20	4.09536e-19
Unc13b	2.74234	5.5391	2.29889e-138	3.92542e-136
Hist1h2bm	-2.7383	0.117131	0.000682186	0.00166908
Serpinb9b	-2.73617	2.11736	1.11621e-15	7.80503e-15
Esrrg	-2.73176	4.65992	1.85368e-96	1.0338e-94
Rgs5	-2.72618	2.55545	1.5832e-67	4.36199e-66
Grm7	-2.72461	4.20505	6.77398e-64	1.6973e-62
Ptchd4	-2.72452	5.95131	4.27785e-123	4.77152e-121
Rbm46	2.72402	1.65633	7.62302e-23	7.2613e-22
Hist1h3c	-2.72381	0.390413	3.3193e-09	1.54317e-08
Penk	2.70749	1.71596	1.03242e-11	5.7347e-11
Il18rap	-2.69596	2.18063	4.12857e-19	3.36489e-18
Lin28b	-2.69465	0.739421	4.44678e-18	3.46889e-17
1110019D14Rik	-2.69363	3.07235	4.22334e-35	5.68774e-34
Sgpp2	2.68334	3.45401	6.22845e-78	2.192e-76
Akr1c14	2.68193	0.415901	3.04267e-15	2.06898e-14
Cd79a	-2.68008	0.47393	8.41974e-06	2.74654e-05
Csmd1	-2.672	6.47899	7.7721e-86	3.27731e-84
Clu	2.66995	3.15398	2.06853e-64	5.24952e-63
Grin1	-2.66866	0.168107	9.94563e-05	0.000278198
Ramp3	-2.66866	1.13262	9.94563e-05	0.000278198
BB218582	-2.66646	0.489977	9.89563e-09	4.42075e-08
6030443J06Rik	-2.66551	2.65669	1.399e-16	1.01947e-15
Cadps	2.66511	1.11188	5.44677e-15	3.64992e-14
Azin2	-2.66356	6.35372	1.81658e-125	2.18479e-123
Gm5893	2.66346	0.529491	4.24113e-13	2.56938e-12
Luzp2	2.65165	4.09126	6.19302e-45	1.07608e-43
Fggy	2.64982	6.70595	4.13173e-160	1.05826e-157
Nrcam	2.64276	4.61604	2.523e-112	2.15405e-110
Apbb1ip	-2.63983	5.93892	4.77914e-119	4.75542e-117
Dnajc6	2.63917	1.84987	1.18974e-23	1.16539e-22
Rnasel	-2.6369	0.489954	1.70315e-08	7.44509e-08
Rrs1	-2.6369	0.320018	1.70315e-08	7.44509e-08
Adtrp	-2.6369	0.168021	1.70315e-08	7.44509e-08
Gsta3	2.63381	1.66003	1.97378e-15	1.3548e-14
Proz	-2.63001	1.41201	1.46845e-05	4.61174e-05
Kcnip4	-2.62888	9.26284	3.0813e-141	5.60757e-139
Col15a1	2.62678	3.80957	2.41779e-31	2.95934e-30
Airn	2.62662	10.0431	1.40389e-245	1.94171e-242
Grid2	-2.62131	7.13473	1.86068e-167	5.47554e-165
Shisa2	2.613	0.465794	4.0041e-07	1.52396e-06
Mctp2	2.60168	4.19462	7.56015e-105	5.28103e-103
Isg15	-2.59061	0.552858	0.0163152	0.0306458
Gnat3	-2.59061	0.355778	0.0163152	0.0306458
Cd200	2.58591	1.60879	1.77551e-38	2.61245e-37
Shcbp1l	-2.58514	2.09324	2.04742e-30	2.44753e-29
Casp4	2.57782	4.36504	2.75776e-106	1.9763e-104
4933405D12Rik	2.57341	3.32186	4.63953e-71	1.39196e-69
Bcl2l14	2.5727	0.178075	7.22237e-07	2.66309e-06
Cuzd1	2.57183	0.752918	5.15291e-17	3.83584e-16
Kcnj15	2.57012	3.19367	9.32738e-71	2.76839e-69
Fam213b	2.56382	0.432764	3.42106e-10	1.71873e-09
Tmem196	-2.56002	2.78328	1.01308e-66	2.73136e-65
Pth2r	2.55906	2.94745	4.39968e-65	1.13742e-63
Chrna7	2.55835	4.76863	1.66833e-114	1.50815e-112
T2	-2.55297	0.928774	6.17717e-14	3.92451e-13
Osr2	2.55257	2.51826	6.71192e-06	2.21083e-05
Pde6c	-2.55216	0.856195	5.66737e-07	2.11681e-06
Gstk1	2.55133	0.0749255	3.07051e-09	1.43135e-08
Trim12a	-2.54918	2.06624	5.66e-48	1.0355e-46
Dpysl4	-2.54126	3.1339	4.41165e-34	5.78914e-33
Fam65b	-2.54031	3.33482	4.24883e-39	6.37371e-38
Acvr1c	-2.5332	0.137746	0.000306206	0.000793542
Cgn	2.53139	2.18238	3.45445e-57	7.55989e-56
Gm19689	2.52079	2.22199	2.05237e-37	2.9174e-36
Kif26a	2.51865	1.56803	2.40351e-11	1.29099e-10
Plau	-2.50072	4.831	3.16262e-95	1.7358e-93
Plaur	-2.49635	5.33439	6.97778e-107	5.05286e-105
Gm10684	2.49147	1.50582	1.57519e-22	1.48308e-21
Sh2d4b	-2.49145	2.76965	4.29223e-29	4.95128e-28
Rassf6	-2.48945	3.24763	1.13788e-18	9.11295e-18
Peli3	2.48756	1.94069	7.1285e-18	5.50806e-17
P2rx3	-2.48559	1.72958	2.07743e-11	1.12238e-10
Klhl1	-2.48117	0.407501	3.75635e-08	1.59564e-07
Hykk	-2.47771	3.73762	2.04377e-40	3.17969e-39
Cyp4f41-ps	2.47282	1.0588	1.34391e-14	8.80931e-14
Tmem150c	2.46939	1.60544	5.05838e-19	4.10096e-18
Gfra4	2.46439	1.00383	1.71623e-08	7.49754e-08
Hist1h2bk	-2.46038	0.127459	0.00053384	0.00132965
Cox6b2	-2.46038	0.513953	0.00053384	0.00132965
Zfp474	2.45064	1.71555	1.91548e-32	2.41284e-31
Slco4a1	-2.44844	2.73492	1.38449e-15	9.58885e-15
Fbxw26	-2.44844	0.922811	1.38449e-15	9.58885e-15
Hpgd	-2.44517	0.329137	0.00387659	0.00830629
Txk	2.4373	1.62721	5.76707e-32	7.15375e-31
Flt4	2.43484	4.66018	1.33844e-108	1.05182e-106
Galnt12	2.43161	1.54498	1.08624e-19	9.08881e-19
Aldh1a3	2.42857	5.21675	1.69547e-125	2.05703e-123
Irx3	2.42479	0.975371	3.59547e-13	2.18781e-12
Car2	2.42472	2.79275	2.07443e-29	2.41714e-28
Gm14325	-2.4216	1.4976	1.10906e-27	1.23208e-26
Serpinb2	2.41757	3.72711	1.69912e-92	8.63992e-91
Abcg2	-2.40913	6.74721	4.83649e-141	8.68746e-139
Pclo	-2.40674	2.90316	2.06617e-47	3.72584e-46
Srrm4	-2.40614	0.90495	1.01861e-12	6.02582e-12
Gm16701	2.40423	0.552737	1.04283e-08	4.65121e-08
Fam89a	-2.39974	1.82159	6.56439e-12	3.68175e-11
Fstl4	-2.39583	2.23906	6.80344e-17	5.03469e-16
Gjb2	-2.39551	2.70705	3.6405e-31	4.44411e-30
Vwa5b2	2.37908	0.0855687	3.58243e-09	1.6577e-08
Gng11	-2.37799	1.583	7.1986e-16	5.08238e-15
Kcnk10	2.37182	5.42635	1.4563e-101	9.23947e-100
Lrrd1	2.36043	1.21239	1.45812e-17	1.11053e-16
Cd5	2.35771	2.30424	2.81603e-27	3.08871e-26
9330159M07Rik	-2.35361	0.811699	8.03668e-17	5.91882e-16
Slc38a4	2.35137	5.945	2.04892e-149	4.29373e-147
Cpm	2.34161	3.47163	1.25811e-67	3.49417e-66
Grin2d	2.34119	3.59989	1.30583e-64	3.33844e-63
Gm11351	-2.34082	1.46582	7.62092e-10	3.73115e-09
Nrxn3	-2.33893	2.22469	3.26088e-15	2.21301e-14
Cyp4v3	-2.33289	2.55689	1.95148e-10	9.97816e-10
4933400C23Rik	-2.33255	0.227065	0.00684576	0.0139817
Fam71e1	-2.32582	1.88999	5.15365e-13	3.09913e-12
Vstm5	-2.3189	1.40332	1.26496e-09	6.09816e-09
A530046M15Rik	-2.31199	3.22681	7.31094e-42	1.18266e-40
Tgfa	2.30816	3.77645	4.3483e-62	1.03871e-60
0610040J01Rik	-2.30757	3.41053	6.28387e-18	4.8663e-17
Aldh8a1	2.30672	0.106669	2.84969e-07	1.10342e-06
Gstm4	2.30484	0.998103	4.60022e-14	2.94155e-13
S100a4	-2.30269	1.31579	0.00159865	0.00367841
Cass4	-2.3022	2.04535	2.12297e-11	1.14654e-10
Mrfap1	-2.29953	2.45098	1.4767e-35	2.01026e-34
Slc37a1	2.29351	0.255553	1.47231e-06	5.25103e-06
Kcnk12	2.29223	1.92575	1.0297e-24	1.04565e-23
Gabrg3	-2.29185	1.19782	5.3461e-10	2.64645e-09
Akr1b10	-2.28772	2.71622	1.36681e-10	7.08293e-10
Adgrg7	2.28671	2.31738	1.34869e-43	2.28041e-42
5830432E09Rik	-2.28647	0.0962225	0.000381993	0.000976769
Tnfrsf11b	-2.28571	6.27444	8.37022e-126	1.0245e-123
Ptch2	2.28428	1.66695	2.53626e-20	2.17747e-19
Thbs4	2.27893	3.74355	1.51996e-35	2.06712e-34
Fam78b	2.27654	5.2845	2.86018e-114	2.53585e-112
2610035D17Rik	-2.27622	5.01563	1.71923e-87	7.54878e-86
Terc	-2.27403	0.868521	3.46262e-09	1.60387e-08
5031434C07Rik	2.27082	3.74326	8.83374e-73	2.73332e-71
Orm3	-2.26929	0.274281	2.27792e-05	6.98579e-05
Aqp11	-2.26818	2.10686	2.25227e-10	1.144e-09
Ptgs1	-2.26808	3.09723	3.74985e-39	5.63741e-38
Cpne9	2.268	0.818314	1.46131e-10	7.55003e-10
Ptpn13	2.26775	6.57746	3.1823e-164	8.80287e-162
Ica1	-2.26059	5.08596	2.16005e-82	8.60968e-81
Apobr	-2.25881	1.68459	2.50488e-13	1.53704e-12
Zfp932	-2.25844	3.14635	2.59893e-39	3.92421e-38
Asb4	-2.2548	0.590572	8.89856e-08	3.637e-07
Ccdc68	-2.2495	3.75147	2.75411e-79	9.94571e-78
Aldh1a1	2.24597	3.60065	7.32773e-81	2.78565e-79
Efcab8	2.24226	3.0668	1.16628e-48	2.17103e-47
Scn2b	2.23765	1.173	9.2728e-15	6.13646e-14
Kctd8	-2.2338	5.29589	1.89496e-96	1.05258e-94
Mgst2	2.23304	1.08011	3.62108e-19	2.95476e-18
Phyh	-2.22902	2.55869	2.60958e-12	1.49826e-11
1700027I24Rik	-2.22802	0.739559	2.38658e-09	1.12543e-08
1500015A07Rik	-2.22772	1.7862	9.39325e-09	4.20447e-08
Eldr	-2.22737	1.8656	3.70792e-08	1.57652e-07
Mast1	-2.22695	0.33794	1.46873e-07	5.8745e-07
Tspan32	2.22624	1.2173	6.72903e-13	4.01853e-12
Apob	2.22575	0.0960929	4.28692e-10	2.13897e-09
1700024B18Rik	-2.22501	1.12754	9.39087e-06	3.04252e-05
L3mbtl4	-2.22248	0.0642557	0.000155868	0.000423206
Lrrc75b	2.2178	1.80241	1.45478e-10	7.52189e-10
Serpinb10	2.21338	0.236537	9.64373e-08	3.92301e-07
Col13a1	-2.21038	0.178121	0.0120117	0.0232583
Mapk4	-2.20363	3.44452	3.96454e-26	4.19537e-25
Gipc2	-2.20052	0.63457	4.58494e-13	2.77039e-12
Il20ra	-2.19856	2.41639	2.41744e-07	9.4451e-07
Fam109b	2.19144	1.80562	8.40189e-11	4.40844e-10
Pi16	2.18713	0.605549	2.31467e-05	7.09063e-05
Slco1c1	-2.18472	0.473901	1.55675e-05	4.87246e-05
Isg20	2.18138	2.59572	8.48035e-48	1.54535e-46
Frmd5	2.17758	3.97815	5.21671e-62	1.24186e-60
Fgd3	-2.17207	5.72134	2.35604e-120	2.4501e-118
Lat2	-2.16818	2.861	1.18286e-19	9.87933e-19
Slc4a5	-2.16796	1.59059	4.71335e-12	2.66845e-11
Lmcd1	2.16715	7.24531	1.04494e-174	3.70578e-172
Sft2d2	-2.16689	4.1846	1.20356e-48	2.23142e-47
1110001J03Rik	-2.16659	0.805588	0.000260723	0.000682578
Spx	-2.16628	1.16303	2.65333e-09	1.2457e-08
Iglon5	-2.1644	1.48193	1.83724e-11	9.99249e-11
Vnn1	-2.16276	0.274254	1.58355e-06	5.62601e-06
Col14a1	-2.16266	7.113	1.71067e-115	1.58794e-113
C4b	2.15867	0.946639	0.000376598	0.000964758
5430403N17Rik	-2.15101	0.311077	0.00109081	0.00257854
Cyyr1	-2.15101	0.568102	0.00109081	0.00257854
Slc9b2	2.14805	0.575661	0.000122171	0.000337477
Ctla2a	2.146	2.12203	2.52485e-30	3.01045e-29
Malrd1	-2.14328	0.498026	2.57067e-05	7.83493e-05
Grip1os1	-2.14278	1.36449	1.16343e-10	6.06307e-10
Grem1	2.14237	3.41726	1.20878e-71	3.69065e-70
Adra1a	2.14028	0.986944	3.99338e-05	0.000118754
Car10	-2.13661	3.99486	7.90809e-77	2.70066e-75
3830408C21Rik	-2.13502	2.27891	2.6266e-16	1.89606e-15
Slc5a7	2.1331	3.39077	2.42329e-30	2.89185e-29
Tbc1d2	-2.1312	4.54705	7.93462e-67	2.14343e-65
Mslnl	-2.1304	0.177977	6.7135e-08	2.77841e-07
A930001C03Rik	-2.12916	3.8797	8.21128e-41	1.29351e-39
4933427G17Rik	-2.12873	0.338009	0.000104941	0.000292689
Matn4	2.12709	2.21948	4.04311e-30	4.7959e-29
B4galnt4	-2.12562	0.432876	0.00467766	0.00986682
Fam20a	-2.12503	5.70818	1.91622e-94	1.01157e-92
4921509O07Rik	2.1116	1.14284	6.8646e-10	3.3716e-09
Csmd3	-2.10339	4.67054	5.07921e-84	2.07842e-82
Adcyap1r1	2.10289	5.16151	2.32819e-127	3.00946e-125
Arhgef39	-2.09971	2.53897	5.28947e-29	6.08641e-28
Gm13157	-2.09945	2.18693	3.59233e-49	6.76914e-48
Rogdi	-2.09614	1.46999	4.23678e-06	1.42854e-05
Npy2r	2.09534	0.506065	0.0217356	0.0395352
Fez1	-2.09452	3.28833	7.72519e-28	8.6167e-27
Lmx1a	2.0938	1.06978	0.00659738	0.0135243
Il18r1	2.0938	1.9528	0.00659738	0.0135243
Irgm1	-2.0907	3.12816	8.97894e-44	1.52004e-42
Fam72a	2.09065	1.71583	2.68421e-15	1.83154e-14
Gm30551	-2.08855	1.68824	4.90629e-10	2.43571e-09
Apol6	-2.08763	2.27685	5.1888e-11	2.75177e-10
Fgf10	2.08445	3.27668	1.67932e-29	1.96171e-28
Plscr4	2.0827	2.69172	5.3307e-23	5.10234e-22
Tagap	2.07974	1.52943	6.05127e-17	4.49974e-16
9030625G05Rik	-2.07866	0.187992	0.00017306	0.000467042
Fgl2	-2.07819	2.96153	0.00182747	0.00416336
Ptgir	-2.0769	0.874808	0.0209211	0.0381993
Ces1a	-2.0769	0.691715	0.0209211	0.0381993
Ak7	-2.07183	1.60546	8.84895e-12	4.93706e-11
E130006D01Rik	-2.06709	0.226876	7.22207e-08	2.9773e-07
A230077H06Rik	2.06567	0.0855577	5.09555e-08	2.13954e-07
Kcnj14	2.06411	1.92287	3.10984e-20	2.66329e-19
Ciita	-2.06295	2.52966	1.85921e-15	1.27807e-14
Angpt1	2.06201	7.5244	3.51062e-133	5.33576e-131
Ush2a	-2.06169	1.47793	3.24823e-10	1.63546e-09
Hck	2.06112	4.75915	3.58366e-97	2.03138e-95
Etnk2	2.05603	0.77302	4.1375e-06	1.39677e-05
Mpp4	-2.05481	3.88889	3.99566e-38	5.81115e-37
Olr1	2.05295	4.16525	6.24277e-91	2.99805e-89
Gm14023	2.04768	0.301962	3.81747e-05	0.00011389
Ppp2r2b	-2.04555	5.09717	1.05223e-68	3.01312e-67
Siah3	2.04176	0.127472	0.000117024	0.000324036
Rasl12	-2.03972	0.69864	2.77774e-05	8.43261e-05
Gm973	2.03881	1.7227	6.0165e-14	3.82946e-13
Phf11d	2.03658	1.22694	2.06602e-10	1.05443e-09
4933406M09Rik	-2.03588	1.66717	1.13171e-06	4.07305e-06
Tmc7	2.03173	4.32477	7.20317e-76	2.40065e-74
Dnah7c	-2.03117	1.52168	8.79808e-11	4.61457e-10
Mamdc2	-2.03072	4.52686	1.99412e-73	6.31138e-72
Mpp7	-2.02777	7.08735	8.41641e-136	1.32281e-133
Cfi	2.02614	0.292765	2.30654e-06	8.02155e-06
2900057B20Rik	2.02614	0.12742	2.30654e-06	8.02155e-06
Ccdc7b	2.02466	0.575474	3.92597e-11	2.09249e-10
Hal	2.02312	1.24612	1.60179e-08	7.02197e-08
Ptprr	2.02308	2.46004	0.00113086	0.002665
Celsr2	2.0212	2.56987	2.72924e-24	2.73141e-23
Lgi2	-2.02069	2.58512	1.48932e-11	8.16115e-11
Gm26705	-2.01901	1.9172	7.93145e-09	3.56631e-08
Galntl6	-2.01609	1.52559	6.13137e-12	3.44868e-11
9530062K07Rik	-2.01537	0.892985	4.50752e-06	1.5154e-05
Slc22a4	2.01315	2.52525	7.3554e-38	1.05861e-36
Trim9	2.00755	2.58545	4.26897e-07	1.61651e-06
Pnmal2	2.00706	0.399112	0.00359067	0.00774752
Plpp4	2.00706	0.390548	0.00359067	0.00774752
Adamts16	-2.00582	3.78409	4.6157e-24	4.5961e-23
Prss36	-2.00395	1.72956	3.10369e-08	1.32532e-07
Vmn2r57	2.0023	0.197838	6.45967e-05	0.000186172
Dok7	2.00091	2.41798	2.17058e-27	2.39404e-26
St8sia4	1.99243	0.560437	3.86294e-06	1.31016e-05
Galnt14	-1.98977	4.90579	5.4909e-71	1.64027e-69
Apol8	-1.98965	1.44918	5.12584e-15	3.4432e-14
Mtcl1	-1.98842	5.87879	1.30541e-86	5.6072e-85
Cacnb2	-1.98676	7.92202	6.88721e-138	1.13401e-135
Eqtn	-1.98659	1.19292	1.21698e-07	4.90302e-07
Scg3	-1.98462	0.227015	0.0011822	0.00277795
Lypd6	-1.98415	3.88161	5.88984e-26	6.17607e-25
Cdkl1	1.98309	1.35561	2.90277e-14	1.87608e-13
1700007K09Rik	1.98289	0.236472	1.48354e-08	6.52428e-08
4921539E11Rik	1.98101	0.560486	0.011672	0.0226704
Gbp3	1.97329	1.2078	0.000616645	0.00152056
Pnp2	1.96912	0.381861	2.13627e-06	7.46506e-06
Clic5	1.9631	1.72245	3.23732e-20	2.76562e-19
Hyal1	-1.96178	0.77279	2.30563e-10	1.17024e-09
Uchl1	-1.96126	2.75073	9.88121e-39	1.46638e-37
Trappc3l	-1.95799	1.28835	7.27356e-05	0.000207381
Grm8	1.95613	4.45539	5.81175e-88	2.56812e-86
1700007B14Rik	1.95535	0.892749	9.71054e-16	6.81067e-15
Hmga2-ps1	-1.95368	1.84361	6.53645e-12	3.66757e-11
S100a1	-1.95288	0.893028	2.90285e-05	8.78541e-05
Gprin3	-1.9499	3.51243	1.2417e-23	1.21457e-22
1700086O06Rik	-1.94655	3.51214	1.52341e-25	1.58067e-24
Rorb	1.9457	3.38513	9.87889e-38	1.41591e-36
Slc6a17	-1.94431	5.19722	2.46627e-67	6.75466e-66
Elfn1	-1.94425	4.31393	7.39838e-52	1.466e-50
Acad12	1.94339	3.34757	7.20102e-48	1.31395e-46
Podxl	-1.94325	2.23893	5.39282e-15	3.61552e-14
Atp2b4	-1.94311	4.81712	1.18733e-84	4.91674e-83
Bend6	1.9401	4.59344	1.16723e-47	2.11585e-46
Siglecg	-1.93705	2.91495	1.0438e-38	1.54736e-37
Megf6	1.93525	6.77161	1.19633e-94	6.43832e-93
Ndst4	1.93105	2.59799	1.16628e-27	1.29461e-26
Abca9	1.93095	2.83258	3.68181e-23	3.53143e-22
4930592A05Rik	-1.92916	2.07747	4.18253e-17	3.12526e-16
Gnrh1	-1.92515	2.40138	6.65706e-12	3.73222e-11
Vsig10l	-1.92358	2.00937	4.62247e-13	2.79185e-12
Col7a1	-1.92198	5.0318	1.70298e-101	1.07552e-99
Fam13a	1.92161	2.75981	9.01404e-22	8.20758e-21
Syt9	-1.9205	1.03721	0.0050285	0.0105457
Gm13483	-1.91998	5.87512	2.28409e-128	3.0138e-126
Vash1	1.91983	2.43707	1.53365e-16	1.11583e-15
Thsd1	-1.91724	4.39876	3.59155e-41	5.69664e-40
Diras2	-1.91709	0.106702	0.000752621	0.00182687
Slc2a2	-1.91533	1.35143	0.000116907	0.000323843
Pkp1	-1.91473	1.78629	4.64948e-05	0.000136736
Hist1h3d	-1.91425	0.575602	1.85753e-05	5.75785e-05
Fam150a	-1.91271	4.34526	5.81348e-95	3.1656e-93
4930593A02Rik	-1.91215	1.40757	5.42752e-09	2.47831e-08
AI607873	1.91184	1.17295	3.58939e-14	2.30906e-13
Cplx2	-1.91082	2.16541	2.98339e-18	2.34317e-17
9130008F23Rik	-1.9103	3.28805	6.31602e-34	8.24122e-33
Abcb1a	1.90397	1.14295	5.85953e-06	1.94395e-05
Grid1	1.90249	3.58225	8.81787e-38	1.26515e-36
Ccdc158	1.90241	0.521681	1.97309e-07	7.77487e-07
Sh2d5	1.90007	2.40251	5.06229e-43	8.43572e-42
Noct	-1.895	9.20471	3.23078e-194	1.54086e-191
Ramp1	1.89391	2.75438	8.42699e-34	1.0944e-32
Frrs1	-1.89348	5.44793	9.93842e-77	3.38567e-75
C030039L03Rik	-1.88933	2.73476	5.08357e-14	3.2466e-13
Iqcd	-1.88906	1.40759	3.12634e-07	1.2048e-06
St6gal1	1.88762	5.90274	4.11015e-133	6.17908e-131
Adra2a	-1.8876	1.37761	7.72442e-07	2.84367e-06
Ccr9	-1.88396	1.57196	4.74875e-06	1.59186e-05
Dnase1l3	-1.88166	0.117054	1.18247e-05	3.76749e-05
Bbox1	-1.8789	0.963962	2.95477e-05	8.9308e-05
Gpc5	1.87722	3.2613	9.4849e-43	1.57486e-41
Ildr2	1.87612	4.2928	2.02935e-59	4.61644e-58
Vsnl1	1.8753	2.70214	8.3643e-20	7.04976e-19
Fer1l5	-1.87515	2.12227	1.13825e-12	6.70204e-12
Eci3	1.87342	0.0534861	0.0032967	0.00716929
Egfem1	-1.87136	0.127429	0.000187004	0.000501153
Gpr85	-1.87136	0.537349	0.000187004	0.000501153
Kng2	-1.8713	1.56794	1.64223e-11	8.96357e-11
Efr3b	-1.86845	2.54899	5.08434e-14	3.2466e-13
A330093E20Rik	1.8666	1.50594	6.32752e-10	3.11888e-09
Gm14164	-1.86602	0.117102	0.000474655	0.00119341
Tnn	-1.86585	5.66377	2.9997e-13	1.83174e-12
Fam132a	-1.86157	2.93626	2.33171e-20	2.00684e-19
4933412O06Rik	1.85951	0.805407	3.49032e-10	1.75289e-09
Cdh26	-1.85895	2.44139	0.00121459	0.00284728
Grip1	-1.85619	7.36429	2.45857e-140	4.35955e-138
Ubb	-1.85472	2.40064	9.92365e-30	1.16416e-28
Abhd18	1.85367	4.1737	7.81027e-72	2.39521e-70
Sh3gl2	1.84476	1.0856	5.4659e-09	2.49419e-08
Musk	1.8438	0.158056	0.0017541	0.00401007
Ube2u	1.84156	0.264878	2.88132e-07	1.11504e-06
Gbx1	-1.84041	1.17811	7.71874e-07	2.84233e-06
Zfyve28	1.83757	4.21571	6.87036e-37	9.70622e-36
Galnt3	1.83687	3.16823	1.1757e-29	1.37806e-28
Tnfrsf18	-1.83559	2.35139	1.04217e-11	5.78191e-11
Rnf26	-1.83551	0.292633	3.2744e-08	1.39606e-07
Aim2	1.83371	0.670332	3.71571e-14	2.38699e-13
Pla2g7	1.83011	2.50827	1.95199e-13	1.20689e-12
Opcml	1.82768	5.63524	1.40632e-104	9.67701e-103
Itih4	-1.82601	0.457606	0.000297622	0.000773034
Cyb5d1	-1.8248	1.3019	8.47228e-09	3.80578e-08
Haglr	1.82189	0.905121	0.000935521	0.00223591
Stxbp6	-1.81705	5.08181	1.24253e-64	3.19432e-63
Apcdd1	1.81429	3.92922	5.36499e-24	5.33452e-23
Rsph6a	-1.81415	0.255567	0.000757916	0.00183908
Pak6	1.81369	0.40741	2.66151e-09	1.24911e-08
Edn1	1.81226	3.35307	2.13568e-45	3.76288e-44
Apobec4	-1.81112	0.0750388	0.0221494	0.0401558
Gm14403	1.80808	1.99177	9.91225e-36	1.35605e-34
2210406O10Rik	1.80592	0.992472	1.42161e-08	6.26585e-08
Cnnm1	1.80567	2.04003	2.5405e-06	8.7866e-06
Cadm2	-1.80461	6.7926	2.13167e-100	1.30457e-98
5830444B04Rik	-1.80442	1.5528	3.08706e-07	1.19099e-06
Col4a3	-1.80442	1.58694	3.08706e-07	1.19099e-06
4931408D14Rik	1.80055	1.06958	7.79368e-09	3.50665e-08
Gm1661	-1.79837	0.117122	0.00194775	0.00441628
Gm4532	-1.79837	0.106691	0.00194775	0.00441628
A730017L22Rik	-1.79833	3.94413	6.69911e-40	1.03065e-38
Tuft1	1.79263	5.84971	3.78072e-137	6.1519e-135
Brinp2	1.79234	0.246141	0.00555759	0.0115651
Tmem117	1.78945	5.17763	1.49575e-73	4.75579e-72
Gja3	-1.7891	0.432671	1.94764e-07	7.68114e-07
Adgrg1	1.78771	2.40993	4.2044e-12	2.38912e-11
Zfp874b	-1.78587	2.58107	4.6784e-19	3.79736e-18
Cobl	1.7856	7.18424	1.81641e-158	4.40751e-156
Ttll11	-1.78504	5.19798	3.13349e-75	1.03189e-73
Acvrl1	-1.78293	1.86234	6.38023e-12	3.58574e-11
Vwc2	-1.78181	1.31558	4.79595e-07	1.80448e-06
Ston2	1.78071	4.32231	1.5422e-48	2.85164e-47
Ppm1j	1.77981	3.44625	6.5649e-63	1.6014e-61
Slc35f1	1.77758	4.65947	1.63598e-52	3.30324e-51
Bst2	1.77469	1.23639	6.69937e-12	3.75391e-11
Tnfrsf23	-1.77316	2.23143	1.44087e-21	1.29998e-20
Dyrk3	1.77146	2.57897	5.6742e-31	6.8963e-30
Vat1l	-1.76514	2.87892	5.40071e-26	5.68039e-25
Trpm3	-1.76055	3.63029	1.61813e-12	9.41931e-12
Olfml2b	1.75825	5.46828	5.37412e-107	3.91208e-105
Zfp493	-1.75346	1.15301	7.24432e-06	2.37883e-05
Sdpr	1.75249	5.34401	2.93318e-111	2.4439e-109
Cyp7b1	1.74401	7.11801	6.16635e-114	5.3979e-112
Cyp2d22	1.74379	2.67596	4.80392e-16	3.42313e-15
Mir7652	-1.74343	0.0962388	0.0134173	0.0257047
Trim36	1.74302	2.91079	4.89035e-32	6.07167e-31
Gda	-1.74281	1.76643	1.19063e-07	4.80104e-07
Fbxo44	-1.74141	1.77274	4.08399e-13	2.47527e-12
Acer2	-1.73361	1.94961	2.9211e-07	1.12949e-06
Hsd3b5	1.73099	0.975364	1.55929e-09	7.45989e-09
Acot6	-1.7308	0.753093	0.000741711	0.00180192
Ostn	1.72694	1.34699	6.74136e-05	0.000193484
Syk	-1.7268	3.53578	9.2729e-24	9.1479e-23
Ftl1	-1.72677	5.5266	6.74425e-100	4.07335e-98
Jph3	-1.72669	1.85918	2.22297e-11	1.19914e-10
0610040B10Rik	-1.72636	1.54517	4.48303e-05	0.000132291
Hoxd3os1	1.7238	3.35846	2.228e-13	1.37202e-12
Als2cr12	1.72312	0.390461	3.63011e-05	0.000108582
Plppr4	1.72011	2.17065	2.32209e-11	1.24823e-10
E2f8	-1.71864	3.04381	3.37146e-23	3.24049e-22
Rragd	-1.71538	2.84053	5.04928e-17	3.76275e-16
Zfp946	1.71409	4.20042	6.15992e-66	1.63527e-64
Slfn5os	1.71356	0.106713	0.0179972	0.0333985
Eps8l3	-1.71278	1.13765	1.14589e-07	4.62605e-07
Gm7694	1.71219	0.521667	3.10273e-06	1.06354e-05
Neto1	1.70841	0.398979	9.14118e-07	3.33769e-06
Smc1b	-1.70785	2.23424	8.209e-11	4.31378e-10
Slain1	1.70532	0.355619	2.70385e-07	1.05136e-06
D330050G23Rik	-1.70445	1.12753	0.00189749	0.00431081
Mmp12	1.70439	0.759494	6.0521e-12	3.40686e-11
Mmd	1.70248	5.68934	1.24275e-118	1.22774e-116
Popdc3	1.70153	0.552833	0.00483259	0.0101673
Zfp93	-1.70091	2.28829	1.98856e-10	1.01576e-09
Mmp3	-1.69964	1.74995	0.00810979	0.0163246
Zfp937	1.69669	2.96312	4.14042e-45	7.22145e-44
Zfp85	-1.69611	0.952355	1.72987e-05	5.38387e-05
2310005E17Rik	1.69549	1.23147	2.34303e-16	1.69667e-15
Col9a2	1.69121	1.8055	2.86634e-12	1.64295e-11
Ccdc116	-1.69074	0.481856	6.87297e-07	2.539e-06
Kank4os	1.68996	0.545078	0.000201973	0.000538763
Cerkl	-1.6849	1.79274	1.09496e-07	4.42429e-07
Tbc1d21	1.68344	0.513793	7.87164e-07	2.89401e-06
Pnpla3	1.68306	0.898996	4.27875e-07	1.61958e-06
C4bp-ps1	1.68271	0.928868	2.32791e-07	9.10817e-07
Spata24	-1.68193	2.54138	1.89579e-10	9.70774e-10
Pamr1	1.68187	4.51132	1.09179e-45	1.93102e-44
Odf3	1.68092	0.766226	3.35267e-09	1.55763e-08
Pcdh15	-1.67851	2.17046	1.31451e-12	7.68105e-12
Acsm3	1.6773	2.69151	1.98519e-22	1.85647e-21
Grip1os2	-1.67688	1.99828	2.83147e-09	1.32438e-08
Adora2b	-1.6756	3.9535	1.62121e-40	2.53653e-39
Cfap43	-1.67433	1.9839	8.25672e-13	4.90334e-12
Anxa8	-1.67381	3.80356	1.76825e-24	1.78256e-23
9330175M20Rik	1.67368	5.46939	8.92135e-111	7.36801e-109
6820408C15Rik	-1.67285	1.39054	6.67004e-06	2.1986e-05
4833412C05Rik	-1.67103	1.62382	1.77241e-09	8.45026e-09
Chn1os3	-1.66655	1.63853	2.65763e-05	8.08749e-05
Nipal4	-1.66624	4.19492	1.3001e-50	2.52908e-49
Lrriq1	1.66606	1.35125	2.58195e-10	1.30666e-09
Cklf	-1.66491	3.91654	5.73682e-29	6.57926e-28
Dok6	-1.66459	5.17763	3.88834e-93	2.0067e-91
Rgs9	1.66411	0.824595	9.62979e-09	4.30895e-08
Piwil2	-1.66313	0.99248	4.14182e-06	1.39789e-05
Plch1	1.66198	1.53701	7.05253e-17	5.21623e-16
Ppp1r3c	-1.66183	1.40343	0.000710506	0.00173255
4930429B21Rik	-1.65754	1.79584	1.6658e-08	7.29335e-08
Cntn3	1.65701	1.27901	7.80987e-06	2.55665e-05
Frk	-1.65632	6.33413	1.65251e-102	1.07811e-100
Gm32014	-1.65592	1.63856	1.6453e-05	5.13799e-05
4930405A21Rik	1.65589	1.26503	1.44534e-05	4.54123e-05
Col25a1	1.65479	6.04866	9.31348e-80	3.42592e-78
Tspan13	1.65462	1.23188	2.67925e-05	8.14971e-05
Malt1	1.64774	4.79133	1.62588e-89	7.54616e-88
Fut9	-1.64649	1.84075	6.59087e-05	0.000189636
Tmod4	-1.64602	0.432869	0.0216223	0.0393602
Ttyh1	1.64476	2.17813	5.14494e-12	2.90804e-11
Prkar1b	-1.64462	4.03689	1.97364e-55	4.19316e-54
4930532I03Rik	1.64453	0.329102	0.000606732	0.00149825
Gfra2	1.6412	1.54529	0.00114337	0.00269265
Tacr1	1.63757	1.81512	6.292e-10	3.10249e-09
Stk31	1.63705	0.364508	0.00216493	0.00486484
E230029C05Rik	-1.63638	0.958178	4.0664e-05	0.000120795
Zfp770	1.63627	3.55168	5.62012e-34	7.36796e-33
1700024P16Rik	1.63483	2.4553	4.296e-21	3.80407e-20
Tas1r1	1.63311	1.69851	7.99648e-12	4.46685e-11
Mob3b	1.63114	4.66558	5.85684e-70	1.7126e-68
Prmt9	1.63096	5.46855	3.43162e-101	2.13796e-99
Folr2	-1.63069	1.36887	3.91085e-06	1.32511e-05
Tlr3	-1.62886	0.117091	0.00180511	0.00411715
Lmntd2	-1.62886	0.117101	0.00180511	0.00411715
Cpne4	1.62861	0.29274	1.23116e-05	3.91361e-05
Plxna4	-1.62294	6.38452	2.28601e-124	2.63482e-122
Dcst1	-1.62281	1.49014	0.000163902	0.000443626
Cenpv	1.62136	2.16813	1.24042e-11	6.82971e-11
Xirp1	1.61947	0.792519	4.89998e-07	1.84212e-06
Lyve1	1.61692	0.283467	9.0142e-07	3.29568e-06
Rgs22	1.61691	0.489927	9.0142e-07	3.29568e-06
Hlf	1.61506	1.46603	0.0153347	0.0289627
Cftr	-1.61501	1.98153	0.00109831	0.00259406
Ccdc141	-1.61438	5.50915	2.30209e-67	6.31751e-66
Slc25a45	1.61431	0.41602	0.000146722	0.000400101
Htr5b	1.61431	0.147888	0.000146722	0.000400101
Csrnp3	1.61396	2.24613	3.18148e-12	1.81981e-11
S1pr3	-1.61195	5.94719	3.8127e-69	1.09861e-67
Gm6548	-1.61172	1.09078	9.20153e-09	4.12132e-08
Rhd	1.61044	1.38178	8.31695e-10	4.06616e-09
Stk10	1.61043	6.51764	1.74413e-120	1.82751e-118
Gpr39	-1.60914	6.28662	2.43441e-108	1.87057e-106
Pxylp1	-1.60693	3.67417	3.50764e-23	3.36904e-22
Fgd5	-1.60556	0.843621	6.19586e-05	0.000179053
Rgs20	1.60387	3.18079	2.18667e-23	2.11792e-22
Adam21	-1.60376	0.0534093	0.000669553	0.00164049
Commd6	1.60331	3.84077	2.22183e-48	4.08645e-47
Col20a1	-1.6029	5.31361	2.78846e-71	8.40244e-70
4930590J08Rik	-1.60257	2.08317	3.59175e-07	1.37497e-06
Galr2	1.60196	1.26491	9.27573e-09	4.15321e-08
Ccdc81	1.59948	0.560258	1.69717e-08	7.42601e-08
Wnt16	-1.59932	3.64423	3.49315e-35	4.72738e-34
4930552P12Rik	-1.59857	1.02608	3.81476e-05	0.000113834
Npy1r	-1.59857	0.886881	3.81476e-05	0.000113834
Itih5	-1.59857	2.39934	3.81476e-05	0.000113834
Slc7a15	-1.59857	0.39041	3.81476e-05	0.000113834
2610507I01Rik	-1.59829	1.12214	2.23028e-07	8.74349e-07
Fras1	-1.59627	7.04806	3.08798e-124	3.5008e-122
BC051019	1.59487	0.837392	3.58234e-05	0.000107199
Ggnbp2os	1.59487	0.799083	3.58234e-05	0.000107199
Sema3e	-1.59464	8.06205	5.14917e-155	1.18697e-152
Col6a3	-1.59251	10.0174	5.39175e-129	7.38349e-127
B430212C06Rik	-1.59241	0.969698	2.35077e-05	7.19643e-05
Cpsf4l	-1.59212	3.14798	9.34929e-16	6.56396e-15
Lrrc17	-1.59151	6.64628	2.8135e-99	1.6773e-97
Stkld1	-1.58964	2.30875	2.1389e-11	1.15469e-10
Cd59a	1.58839	4.61981	1.18455e-83	4.80454e-82
Acrv1	-1.58658	0.311008	0.000250121	0.000657061
Il31ra	-1.58572	1.6277	0.00462403	0.00976263
Sh2d3c	-1.58421	2.20503	2.15139e-14	1.39765e-13
Matn3	1.58329	1.92301	8.33262e-11	4.37542e-10
Samhd1	-1.58023	4.68665	2.72345e-49	5.15294e-48
Pter	-1.57949	5.45167	6.96522e-74	2.22485e-72
Alox5	1.57779	2.69836	8.10885e-24	8.03392e-23
Dcc	-1.57747	6.26888	1.49411e-107	1.12923e-105
Slc35f2	1.57614	0.824778	0.000231146	0.000610227
Trpv6	1.57614	0.407564	0.000231146	0.000610227
Rasgef1a	-1.57505	0.373233	0.00278867	0.00615545
Acss1	-1.57505	1.6953	0.00278867	0.00615545
Nme5	-1.57407	0.739624	9.39948e-05	0.000263968
Zfp783	-1.57303	2.73271	5.0712e-16	3.60987e-15
Zbed3	-1.57147	5.0102	3.83595e-40	5.94787e-39
Acan	1.57083	4.08647	1.28194e-10	6.65808e-10
Rasl11b	-1.57033	3.53666	2.08208e-36	2.90588e-35
Gsto2	-1.57018	3.09249	1.21441e-13	7.57963e-13
Sh3gl3	1.56806	1.55282	2.96176e-07	1.14457e-06
Piezo2	-1.56726	10.0264	6.14776e-238	5.00175e-235
4933421O10Rik	-1.56683	3.48841	1.20135e-15	8.36649e-15
Gm11837	1.56627	0.505895	4.02264e-06	1.36032e-05
Gm5595	-1.56251	4.18177	1.85672e-38	2.72904e-37
Ankrd23	-1.56054	3.36034	7.22955e-17	5.33575e-16
Kctd12	-1.55958	4.58679	3.55105e-30	4.22309e-29
Igfbp5	-1.5585	7.8914	4.62467e-99	2.71033e-97
Oas1b	1.558	2.54509	4.21401e-14	2.69958e-13
Btc	1.5545	1.36457	1.37016e-05	4.31678e-05
Atp10d	1.55349	4.51045	2.5598e-74	8.19551e-73
4930452B06Rik	1.55145	4.37294	1.43976e-59	3.28061e-58
Nfatc2ip	1.55106	2.08805	7.1102e-16	5.02253e-15
Prob1	-1.54941	1.02614	0.000379773	0.00097181
Sgip1	1.54803	6.73285	8.55097e-95	4.61986e-93
Add2	1.54703	0.705558	0.000193846	0.000518284
Map7	-1.54434	3.24595	1.56533e-23	1.52037e-22
Slc6a7	1.54367	1.42879	0.0128255	0.024713
Zfp940	1.54345	1.91995	1.07088e-11	5.93641e-11
Col28a1	-1.54336	3.44815	6.86855e-09	3.10556e-08
Stom	-1.54326	3.12837	3.94029e-26	4.17291e-25
Fam189a1	1.54308	3.59474	1.22754e-23	1.20157e-22
Krt80	-1.54188	0.61286	0.000141955	0.00038775
Psrc1	-1.54126	4.13544	1.15933e-42	1.92033e-41
Rims2	1.54042	5.37039	1.3334e-90	6.3594e-89
Rbm43	1.54019	2.09594	7.1452e-17	5.28195e-16
Zfp944	1.54	5.52291	2.80089e-97	1.60079e-95
Nyap1	-1.53996	2.29276	9.8667e-12	5.48719e-11
Tmem181a	-1.53933	2.68507	1.05332e-39	1.61156e-38
Cwc22	1.53917	1.54064	1.36838e-20	1.18436e-19
Apba2	1.53904	1.18793	2.09147e-07	8.22259e-07
Myrf	1.53887	3.55981	1.03368e-42	1.71425e-41
Arhgap33	-1.53682	1.94074	1.78013e-07	7.05674e-07
3110035E14Rik	-1.53536	1.04242	1.10392e-07	4.45921e-07
St18	-1.53473	1.87123	1.40457e-15	9.71813e-15
Siva1	-1.53413	2.91092	8.7848e-16	6.18019e-15
5033403F01Rik	-1.53283	0.560477	0.0202306	0.0370895
Lrrc4c	-1.53255	4.74956	2.77103e-62	6.68868e-61
Nlrc4	-1.5317	1.39054	2.01806e-05	6.22197e-05
C430002N11Rik	-1.52986	2.48998	1.45816e-11	7.99676e-11
Pax8	1.52815	1.35134	7.02562e-07	2.5947e-06
Pak7	-1.52744	2.59424	2.06935e-15	1.4197e-14
Tinagl1	-1.5273	3.61766	1.8863e-40	2.94463e-39
Zmynd15	1.52718	0.0748905	2.12017e-05	6.52806e-05
Sowahc	1.52665	1.77609	1.92378e-12	1.1147e-11
Cpxm2	-1.52565	4.95507	1.52354e-09	7.29136e-09
Gm6277	1.5251	1.03168	0.000678012	0.00165916
Cpa4	1.5251	1.32919	0.000678012	0.00165916
Grik1	-1.525	6.44495	1.35709e-95	7.47807e-94
Crybg3	-1.52324	5.97568	1.38672e-94	7.40528e-93
Esr2	1.52266	2.14538	8.89689e-13	5.27445e-12
Dok2	1.52124	0.207582	0.000161879	0.000438579
Tnfsf18	1.52025	0.670493	3.20736e-07	1.23465e-06
Gstm2	-1.51961	1.85927	2.64373e-07	1.02943e-06
Terb1	1.51743	3.1179	2.61532e-32	3.28245e-31
Jph1	-1.51734	5.9061	1.38715e-88	6.31108e-87
Sgk1	-1.51648	5.84318	2.10515e-89	9.71303e-88
Pglyrp1	1.51425	1.44938	5.87432e-07	2.18702e-06
Fgf14	1.51366	4.99862	1.59857e-77	5.56924e-76
A630001G21Rik	1.51337	0.874566	1.46541e-07	5.86291e-07
Tmem141	1.51312	1.251	0.00552499	0.0115024
1700030J22Rik	1.50906	0.364443	7.26104e-05	0.000207067
Olfm3	-1.50895	1.05889	0.000213386	0.000566368
Ctsc	1.50811	5.94157	7.6229e-103	5.02059e-101
Spta1	-1.50803	1.58327	0.000130518	0.000358601
Tfpi2	1.50731	0.880697	6.70049e-08	2.77386e-07
Gabrb1	-1.50709	5.5495	3.40103e-108	2.5846e-106
Cntfr	-1.5069	2.23839	2.19758e-21	1.96857e-20
Cadps2	1.50624	2.0748	4.82536e-15	3.24767e-14
Elavl4	1.50197	2.84622	1.39921e-29	1.63727e-28
Prodh	-1.50123	2.2319	5.77873e-08	2.41176e-07
Eppk1	-1.5005	1.59425	8.58839e-09	3.85544e-08
Prrt3	1.50013	0.407478	7.99873e-06	2.61476e-05
