# Supplementary material for: Characterization of sequence determinants of enhancer function using natural genetic variation
Source: eLife. 2022 Aug 31;11:e76500. doi: 10.7554/eLife.76500 (PMC9662815; doi:10.7554/eLife.76500)
Supplement: Supplementary file 6. [file elife-76500-supp6.xlsx]

## Sheet: Sheet1
Chromosome	Start	Stop	Active H3K27ac	Inactive H3K27ac	Strain	Active allele	Inactive allele
chr1	10499472	10499473	102	17.5	B6xCAST	CAACCAGGACATTTCAACATGAGGAATGTTAGATCATTGACCTGCCATGGGGCCATTTTGTGTAGGGGTTAAGGAACGTGGAGCTTTTTCTGCACTCAATACTTCTGAGCAAGGGGATCGATCTTGTTATCTAATGTCATAATTCTATCTAGCAGGTGTGAGGAATAAAGTGGAGAGAGCTTGACTAGGCAGAGAACTGGTATTCTTATCAATTAGCTAAGGGTGTCTTTGTCATTTTTCTGTAATAGATAATTATTTTTAATTTGGTCCATGTTTAGTTATCGAAATATGTTCTTATTAGTCTTATTTCTTGGTGTGAACACTGCAGCCTTTTCTAAAGGTTTGTGTTCACTAGAATATACCACATTCCAGCTGAGGTGGTCAGGCTGGCTTTCCCCT…	GCAACCAGGACATTTCAACATGAGGAATGTTAGATCATTGACCTGCCATGGGGCCATTTTGTGTAGGGGTTAAGGAACGTGGAGCTTTTTCTGCACTGAATACTTCTGAGCAAGGGGATCGATCTTGTTATCTAATGTCATAATTCTATCTAGCAGGTGTGAGGAATAAAGTGGAGAGAGCTTGACTAGGCAGAGAACTGGTATTCTTATCAATTAGCTAAGGGTGTCTTTGTCATTTTTCTGTAATAGATAATTATTTTTAATTTGGTCCATGTTTAGTTATCGAAATATATTCTTATTAGTCTTATTTCTTGGTGTGAACACTGCAGCCTTTTCTAAAGGTTTGTGTTCACTAGAATATACCACATTCCAGCTGAGGTGGTCAGGCTGGCTTTCCCC…
chr1	33467609	33467610	409.5	53.5	B6xCAST	GGTTAAGGGGCTCATCCGTGGGAAGTCTGATTCTCCCTCTCTTAGCAGCCATTAAGTGCCTATAACTCTTCATCTAGTGGTGGTGGCTTGTGAGATCTCTCCCATCAGTGTTGGTATGTCACCTGCTGTTCCTGTGTGTGTGTGTGTGTGTGTGTGTGTGTGTGTGTGTGTGTTCAGGTCTTGCTTAGGTAGCCATGCTGTTGAGGTTTCACGGGGCAGCTTACCTGTCCCACAGAGAAGACACAGCTTCTCAGATGAGTTCCTGGTCCTGTAGCTCTTACAATCTCTTCACCACTCGTAAAGGAGGTGAAAATGAGTCTTTTTTTTTTTTTTTTTAATGATTCAGCTGTTTCTTATATGTTGGCATTTATTTCTCATATAAAATACAAAATACCATAT…	AAACAGGTTAAGGGCTCATCCGTGGGAAGTCTGATTCTCCCTCTCTTAGCAGCCATTAAGTGCCTATAACTCTTCATCTAGTGGTGGTGGCTTGTGAGATCTCTCCCATCAGTGTTGGTCACCTGCTGTTCCTGTGTGTGTGTGTGTGTGTGTGTGTGTGTGTGTGTGTGTGTTCAGGTCTTGCTTAGGTAGCCATGCTGTTGAGGTTTCACGGGGCAGCTTACCTGTCCTACAGAGAAGACACAGCTTCTCAGATGAGTTCCTGGTCCTGTAGCTCTTACAATCTCTTCACTACTCGTAAAGGAGGTGAAAATGAGTCTTTTTTTTTTTTTTTTTAATGATTCAGCTGTTTCTTATATGTTGGCATTTATTTCTCATATAAAATACAAAATACCATAT…
chr1	38424561	38424562	202	35.5	B6xCAST	TTTTGCTTCTACTGGTTCTTCTCGACAGCTTCTGTCACACTCCTAAATGTTCCATGGTTACAACTCCCAGGGTCATTGGTGGCAAATGATTTTGAAAATTTCAAGATCCTTTTAAAAACGCCTCTCCTTTCCAAATCCTCCCTCAGAGCTGAATATAATTGTGTTTGCTTTTTACGTTGCTAAATCAAGGGGCAGACTTCTTATGGTTCATGGACCATCCTTGAATGGACACACTACTCACAATGTGTTCTCTGCGGTGCAGTGTTACACTCAGAGATAGCCTGGGGCAGGGCAGAGTTTCTACAGGGTAGGACAAAATATCCCACAAAGTATCTTTATATGGTCAGTGCTTCATGTACTAGAAAATATCATGATTCTATGTCAACACTCTCACCCCAG…	CAAACTGTTTTTGCTTCTACTGGTTCTTCTCGACAGCTTCTGTCACACTCCTAAATGTTCCACGGTTACAACTCCCAGGGTCATTGGTGGCAAATGATTTTGAAAATTTCAAGATCCTTTTAAAAACGCCTCTCCTTTCCAAATCCTCCCTCAGAGCTGAATATAATTTTTACGTTGCTAAATCAAGGGGCAGACTTCTTATGGTTCACGGACCATCCTTGAATGGACACACTACTCACAATGTGTTCTCTGCGGTGCAGTGTTACACTCAGAGATAGCCTGGGGCAGGGCAGAGTTTCTACAGGGTAGGACAAAATATCCCACAAAGTATCTTTATATGGTCAATGCTTCATGTTCTAGAAGATATCATGATTCTATGTCAACACTCTCACCCCAGGT…
chr1	44398259	44398260	151.5	11	B6xCAST	TTTTAACTTTTATCTATCGCACCTTTATAGCCCTTTTCAAACTTTCCACAAATAATTCATGGCTATTCAATGTCTGTCCCAATGATCACTGTAAACTTACCAGGATCCCTAGTCAAGGTGGCAGGTTCCATACCAAAATTCGTTGGCCGGCCAAAAACACTGCAGTGATCTTCACTAGTCCCTTTATACTCGAGCCTTACTTTGGGCGCCAGCTGCCCTGACCTGCAGGACTTAAACAACAGGGTTCTTGAAGGAAGGGAGGTACAATGAAAAATTTTGGGATCAGAAGACACAAAGGAAGGAGGCAAGACAAAAAATCCTGTTTAAGCCTTGTTTTTTCTTGGGAAATGGAGGGCTTTTAAAGATGAAAACTGCAAATGGTATTTGCTCAGGTACACG…	TTTTAACTTTTATCCCTTGCGCCTTTATAGCCTTTTTCAAACTTTCCACAAATAATTCATGGCTATTCAATGTCTGTCCCAATGATCACTGTAAACTTACCAGGATCCCTAGTCGAGGTGGCAGGTTCCATACCAAAATTCATTGGCGGACCAAAAACACTGCAGTGATCTTCATTAGTCCCTTTATACTCCAGCCTTACTTTGGGTGCCAGCTGCCCTGACCTGCAGGACTTAAACAACAGGGTTCTTGAAGGAAGGGAGGTACAATGAAAAATTTTGGGATCAGAAGACACAAAGGAAGGAGGCAAGACAAAATATCCTGTTTAAGCCTTGCTTTTTCTTGGGAAATGGAGGGCTTTTAAAGATGAAAACTGCAAATGGTATTTGCTCAGGTACACG…
chr1	45713443	45713444	256	48.5	B6xCAST	TCAACAAATAAATAGATCTTGTTTGTACAGATGTATTAGTAGCCCACAGGGAAGGACTTTACCAGTCAACAAACCTTATCATTGAAATTGAATCTTCAATAGCTAGTAATCAGAAGCATATCAGCAGAGCAGACTGTAAAGGGAAAAATCTGTTTACTGTTTGTCCATAAATAAGCTAGAAATATATCCATAAAATCATCTAAATTATAACAATACAAACTTTTTTTAAATCTTGAAATAAGTTCTAAATGTTTAGAGGGATGGCACAGCCTATAATCCTAGCAGTTGGCAGGAAGGGGCAGGAAGTTCACATTTTGTTAGAGTTGACATATTGAAAAAATATAGTTTTCATATGCTACACTTGGCACTAACTTCAAAATGTCACAAAATGTTCTGGAT…	TCAACAAATAAATAGATCTTGTTTGTACAGATGTATTAGTAGTCCACAGGGAAGGACTTTACCAGTCAACAAACCTTATCATTGAAATTGAATCTTCAATAGCTAGTAATCAGAAGCATATCAGCAGAACAGACTGTAAAGGGAAAAATCTGTTTACTGTTTGTCCATAAATAAGCTAGAAATATATCCATAAAATCATCTAAATTATAACAATACAAACTTTTTTTAAATCTTGAAATAAGTTCTAAATGTTTAGAGGGATGGCACAGCCTATAATCCTAGCAGTTGGCAGGAAGGGGCAGGAAGTTCACATTTTGTTAGAGTTGACATATTGAAAAAATATAGTTTTCATATGCTACACTTGGCACTAACTTCAAAATGTCACAAAATGTTCTGGAT…
chr1	51458267	51458268	139	17.5	B6xCAST	CTTGCCACTTATGCCTTTTGAGATACTCAGCATCCTTCCTCCCGCATCCATTGATCCCTGCTTCCCCAGCCACTACAATTAACTTCACCATCCCTTTTCCAGCCTCTCCTTGGCTGATCTTATGGAACTACTTTAGTTTTGTAGTGCAATAATAATTTGCTGGATTCCAGTGAGCTATTTTTTTAATTCAATATTTGCATTGTATGGGGTTCTCTAAAGGAAACGAACCAATAGAATACATACACGTTATGAACAAAGATTCACTACATTGGCTCACAAGATATATACCAGGTAATCAAAAAATGTCCATCTTTAGAGCGGAGAGGCTGAGAAGCAGATATCACCTCAGTCCACACATCTGTTTTCTTTCGATATCCCAATCTGGTCTGCAGAAGATTC…	TTTCCATCCTTGCCACTTATGCCTTTTGAGATACTCAGCATCCTTCCTCCCGCATCCATTGCTCCCTGCTTCCCCAGCCACTACAATTAACTTCACCATCTTTTTTCCAGCCTCTCCTTGGCTGATCTTATGGAACTACTTTAGTTTTGTAGTGCAATAATAATTTGCTGGATTCCAGTGAGCTATTTTTTTTAATTCAATATTTGCATTGTATGGGGTTCTCTAAAGGAAACGAACCGATAGAATACATACACGTTATGAACAAAGATTCACTACATTGGCTCACAAGATATATACCAGGTAATCAAAATGTCCATCTTTAGAGCGGAGAGGCTGAGAAGCAGATATCACCTCAGTCCACACATCTGATTTCCTTCGATATCCCAATCTGGTCTGCAG…
chr1	55258990	55258991	155.5	6.5	B6xCAST	ACCTCTTGACATCAGCAATAGTGACTGGGTTTGGTGTCTGCATGTGGGAACCCCAGGTGAGGCAGTCTCTGGATGGCCTTTCCTTCCATCTTTGCTCGACTCTTTGTCCCTGTATTTCCTTTAGATAGCAGCAATTCTGAATTAAAATTTTTGAGAAGGACATCCCTCAACTGGTGGTGTGCCTAACCTCTCCATATGTTCTCTACAGGTTCTTTCTCCCCTTTGTTGGGTCTTGGGAGCCTCTTGCTTTCCTGGTGTCTGGGACTTTCTGTTGGCTACCCCCGTTACCCATCCTCAATTGCTATACACCTCTGTTCAATTTCCTGACCCTCTGTACATCTCCTCTGTCTCCTCCCACACCTGATCCGCCTTTTTGCCTGCTTGCCTTGTGAGACTGAG…	CTTGACATCAGCAATAGTGACTGGGTTTGGTGTCTGCATGTGGGATGGAACCCCAGGTGAGGCAGTCTCTGGATGGCCTTTCCTTCCACCTTTGCTCGACTCTTTGTCCCTGTATTTCCTTTAGATAGGAGCAATTCTGAATTAAAATTTTTGAGAAGGACATCCCTCAACTGGTGGTGTGCCTAACCTCTCCATATGTTCTCTACAGGTTCTTTCTCCCCTTTGTTGGGTCTTGGGAGCCTCTTGCTTTCCTGGTGTCTGGGACTTTCTGTTGGCTACCCCCGTTACCCATCCTCAATTGCTATACACCTCTGTTCAATTTCCTGACCCTCTGTACATCTCCTCTGTCTCCTCCCACACCTGATCCGCTTTTTTGCCTGCTTGCCTTGTGAGACTGAG…
chr1	55859202	55859203	225.5	26	B6xCAST	TTTCTCTTTCTCTCCCCTCTCTCTTTCTCTCTGTTTCTGTCTCTCTCTCTGTGTGTCTCTTTGTGTGTGTCTTTCCCTCTGTCTCCCTCTCTGTTACTCATTTTATGTTTATTTTTTCTCAGCCTCTTCTCTTAAGTTCAGTCCACCATACTACCCACAGGACTTTTGCTAAGGTCATCTGTGATTTCCATGTTGTCAGATCTTTGACTCCATTGAGTGGTCTGCCATAGTGCATACTCCCTTTGTTCTCCATGCTGCAGCCTTCTGGGTTCCCATTCTCCTTTCTGCCTGTCCTTCAGCTTCTCCTTCTCTGCTTACTACAGAGCCAACTGCAGCATCCACCAGGGGTCGGTGCTAGGTCGGTACTTCTTCTCTGCTACTCTTGCACCTGTGGCCCTA…	CTATTCTTTCTCTTTCTCTCCCCTCTCTTTTTCTCTCTGTTTCTGTCTCTCTCTGTCTCTTTGTGTGTGTCTTTCCCTCAGTCTCCCTCTCTGTTACTCATTTTATGTTTATTTTTTCTCAGCCTCTTTTCTTAAGTTCAGTCCACCATACCACCTACAGGACTTTTGCTAAGGTCATCTGTGATTTCCATGTTGTCAGATCTTTGGCTCTACTGAGTAATCTGCCATAGTGCATTCTCCCTTTGTTCTCCATGCTGCAGCCTTCTCAGTTCCCATTCTTTTTTCTGCCTGTCCTTCAGCTTCTCCTCCTCTGCTTACTACAGAGCCAACTGCAGCATCCACCAGGGGTCGGTGCTAGGTCAGTACTTCTTCTCTGCTACTCTTGCACCTGTGACCCTA…
chr1	60161582	60161583	871.5	132.5	B6xCAST	CTTCTGGAGTGTCTGAAGACAGCTACAGTGTACTTACATATAATAAGTAAATAAATCTTTAAAAAAAAAAAAAAAAAAAAGAGGTGTGGCCTTATTGAAAAAGGTGTGTCAGTTGGAGTGGGCTTTGAGGTTTCAAAAGCCCCCACCATAGCTCCCCCAACCCCACCCCTGCCTCTGCTGCTAGGATGTAAACTCTGAGCTTCTGCTCCAGAGACATGCCTGCCTTTAATCATGCTTTCTGCCACAATGATCATGGACTAACTCTGAAACTGTAAACAAGCCCCCAATTAAATGTTTTCTTTTGTAAGCTGCTTCACTCATGGTGTCTCATCACAGCAATAGAGTAATAACTAAGACATAAAGTTTCTGTCTGATGAAATACACCGTAGTGATAGTTGT…	CTTCTGGAGTGTCTGAAGACAGCTACAGTGTACTTACATATAATAAGTAAATAAATCTTTAAAAAAAAAAAAAAAAAAAAGAGGTGTGGCCTTATTGAAAAAGGTGTGTCAGTTGGAGTGGGCTTTGAGGTTTCAAAAGCCCCCACCATAGCTCCCCCAACCCCACCCCTGCCTCTGCTGCTAGGATGTAAACTCTGAGCTTCTGCTCCAGAGACATGCCTGCCTTTAATCATGCTTTCTGCCACAATGATCATGGACTAACTCTGAAACTGTAAACAAGCCCCCAATTAAATGTTTTCTTTTGTAAGCTGCTTCACTCATGGTGTCTCATCACAGCAATAGAGTAATAACTAAGACATAAAGTTTCTGTCTGATGAAATACACCGTAGTGATAGTTGT…
chr1	63856488	63856489	898	16.5	B6xCAST	TAGAAATAGGGTTAAAAAGTAGACTGTGGTCATTAGATACTTGGCTCTTTACCACACTGACTGCAGGACTATAGAATTTTGCCTCAATTTTCTCTTTCTCTTTATTTTTATTTTTATTTTTGACTTTTTTGAGACAGGGTTTCTCTGTGTAGCCCTGGCTGTCCTGGAGCTCACTCTGTAGTCCAGGCTGGCCTCAAATGCAGAAATCCACCTGCCTCTGCCTCCCAAGTGCTGGGATTAAAGGTGTGAGCTACCACTGCCCAGCTTGGGTCAATTTTCTAACACATCAATTCTCAGTTAACCCACTTATAAGATGGTGGTAGTTACAGTAAATGCTTGATGGTATCGTCTAGAGAATTAAAAGTATGTAAAATGCTTGCCAAAGAGGTATTGAGTTAC…	TAGAAATAGGGTTAAAAAGTAGACTGTGATCATTAGATACTTGGCTCATTACCACACTGACTGCAGGACTATAGGACTTTGCCTCAATTTTCTCTTTATCTTTATTTTTATTTTTATTTTTGACTTTTTTGAGACAGGGTTTCTCTGTGTAGCTCTGGCTGTCCTGGAGCTCACTCTGTAGTCCAGGCTGGCCTCAAATGCAGAAATCCACCTGCCTCTGCCTCCCAAGTGCTGGGATTAAAGGTGTGAGCTACCACTGCCCGGTTTGGGTCAATTTTCTAACACATCAATTCTCAGTTAACCCACTTATAAGATGGTGGTAGTTACAGTAAATGCTTGATGGTATCGTCTAGAGAATTAAAAGTACGTAAAATGCTTGCCAAAGAGGTATTGAGTTAC…
chr1	70852152	70852153	65.5	10.5	B6xCAST	ATAATAATGAACAGTCACCAGAAGGGGAGTTCAGCTGCCGGAGAGCCGTGCGGTCATTTTATTTTTGCTCAGGTGGAAGAGGTCATTCATTATGGAAGAGTGTTGGCTCCCTGAGTGAATGTAATGCCGTTGACAGTCTGCCTGGCTTTAATGGCATCCCCTCATTTTAGGTGGCTCTCAACCACTAGATTGTTAACACACTCCCTCCAGCTTGTCCTTGTGTGTGCCGTGCAGTAAAATTTTGAGAAAACAAGCTGTGACCACTAGGGACTATTTGCATCAGATCATTTGTACACAACCCACAAAGCTCCCAGGCAGCTTGGAGGATTACATAAACACCTCCCGAACCCACCCGCATGGCAGAGCTTCCCAGGTGCCCCATACCAGCTGTTGTGTCCG…	ATAATAATGAACAGTCACCAGAAGGGGAGTTCAGCTGCCGGAGAGCCGTGCGGTCATTTTATTTTTGCTCAGGTGGAAGAGGTCATTCATTATGGAAGAGTGTTGGCTCCCTGAGTGAATGTAATGCCGTTGACAGTCTGCCTGGCTTTAATGGCATCCCCTCATTTTAGGTGGCTCTCAACCACTAGATTGTTAACACACTCCCTCCAGCTTGTCCTTGTGTGTGCCGTGCAGTAAAATTTTGAGAAAACAAGCTGTGACCACTAGGGACTATTTGCATCAGATCATTTGTACACAACCCACAAAGCTCCCAGGCAGCTTGGAGGATTACATAAACACCTCCCGAACCCACCCGCATGGCAGAGCTTCCCAGGTGCCCCATACCAGCTGTTGTGTCCG…
chr1	70854237	70854238	404	30.5	B6xCAST	TAGCCAGTCTCGTGACGTTTGACGTGATGAGAACACCACAGTGCTCCATAGGTTACAGAGACGTTCCCTTGCTTATCATTTTACTTGGCAATCTTGCGACCCTGTGAGGATGAACATGGAGGCATCACATTGCTCTCCCTGCCTACAATGGAAGACTGGAAATTGAGAGAGCACATCTAGCAATTAAAACACAGACCAAAACTAAGTCCCTGGCTTACGATCCCAAGTCCTCTACTACCTGTTTGTCCAGGGAGATGGAGGATGAGAGCAACTACAGGCATGAGTAGCTTCGCTGTCCCTAGTACTCTGAGTCCTCTGGCTGTACATTGGTACAGATATTGATTAGGGAGCCTCTGTTGGCCGATTCATATTTTTGACCCAGAAACACATGCTATGAGA…	TAGCCAGTCTTGTGACGGTTGACGTGATGAGAACACCACAGTGCTCCATAGGTTACAGAGACGTTCCCTTGCTTATCATTTTACTTGGCAATCTTGCGACCCTGTGAGGATGAACACGGAGGCATCACATTGCTCTCCCTGCCTACAATGGAAGACTGGAAATTGAGAGAGCACATCTAGCAAGTAAAACACAGACCAAAACTAAGTCCCTGGCTTCCGATCCCAAGTCCTCTATTACCTGTTTGTCCAGGGAGATGGAGGATGAGAGCAACTACAGGCATGAGTAGCTTCGCTGTCCCTAGTACTCTGAGTCCTCTGGCTGTACATTGGTACAGATATTGATTAGGGAGCCTCTGTTGGCCGATTCATATTTTTGACCCAGGAACACATGCTATGAGA…
chr1	80609806	80609807	190.5	22.5	B6xCAST	ACTCATCTGGGCTAATTGTCACAGTGACGTTAACTTGTTCTGCTCCTTTTGGTCATGGTCACCTTCCTGGGAAGGCAGAGGAAGCAGCCTTCACACACAGCATTACCTTCAGACCTGAGAAAAACTTCCTACCACACTCCATTTTTCTGTAATAGCATATTATACCACTTGAACAAGGAACCAGTCCTTTCACAGTTTTGTTTGATTGACAAGATTAAAGCCTCTGACTACAATATTTTCCTCTCTCTCTCCAATGAGAGCTAATATGTCATCTGGATTTTAGGGGCAAGTTCAAATGGCAAGTTGCAGAGCAAAATAATTGTTTGAAATGTTTTATCTGAAACATGTGCATTATGGGATTTTTAACTGATTAGGTATGGCAGTAACGAGAGAGTGGAG…	ACTCATCTGGGCTAATTGTCACAGTGACATTAACTTGTTCTGCTCCTTTTGGTCATGGTCACCTTCCTGGGAAGGCAGAGGAAGCAGCCTCCACACACAGCATTACCTTCAGACCTGAGAAAAACTTCCTACCACACTCCATTTTTCTGTAATAGCATATTATACCACTTGAACAAGGAACCAGTCCTTTCACAGTTTTGTTTGATTGACAAGATTAAAGCCTCTGACTACAATATTTTCCTCTCTCTCTCCAATGAGAGCTAATATGTCATCTGGATTTTAGGGGCAAGTTCAAATGGCAAGTTGCAGAGCAAAATAATTGTTTGAAATGTTTTATCTGAAACATGTGCATTATGGGATTTTTAACTGAGTAGGTATGGCAGTAAAGAGAGAGTGGAG…
chr1	83020738	83020739	159	23	B6xCAST	GTTTGGAAAAAATGACCTGTACTGATATATATATAGTTTGAAAAGTATTACCATTTAGCAACCAGGGTTTTCTTTAACTGAACAAAGGACTCAAATTATTGACACCTGGTCAGTTATTTTCTGGTAGGTTATCTGTGATAGAACTGTCTCTAAAAATAGCTCTCCCCAAGAATTTCAGCCATAAGAGCAATAATTTCAGAGATCCAATGATTCTGCCTCAGCCTTGGCTTTCAGGAGTTAGCTGAAGCCTTCCAAGATGGAAACAATAAAAACACAGAGGCTACGTGCATTTCTGAAGCTTTCTGTAGAGGAAGGTGTGGAAAAATATCCCACTTCCTAAAACACATCTTCAAAGTCTTGGGTAACATTTCCATTTATGACTATATAAATATTTATTTC…	GAGGGTTTGGAAAAAATGACCTGTACTGATATATATATAGTTTGAAAAGTATTACCATTTACCAACCAGGGTTTTCTTTAACTGAACAAAGGACTCAAATTATTGACACCTGGTCAGTTATTTTCTGGTAGGTTATCTGTGATAGAACTGTCTCTAAAAATAGCTCTCCCCAAGAATTTCAGCCATAAGAGCAATAATTTCAGAGATCCAATGATTCTGCCTCAGCCTTGGCTTTCAGGAGTTAGCTGAAGCCTTCCAAGATGGAAACAATAAAAACACAGAGGCTACATGCATTTCTGAAGCTTTCTGTAGAGGAAGGTGTGGAAAAATATCCCACTTCCTAAAACACATCTTCAAAGTCTTGGGTAACATTTCCATTTATGACTATATAAATATTTA…
chr1	87961645	87961646	1190.5	214	B6xCAST	AGGCTCCTTCTGCCCTTCGGACACAAAACTCACCCCTGAGCTAAGCTGGAGTTTTCCCCACTCCCATGGCCAGCCTGGGTGGCCCCCTCATTCCCAACTCTATATGGTTCCTAGTGGTGACTGGACACTGGGAGTTTGTGAAACCCTGCCTTCTTCACCTCAGCCTGTGCTGTTTCTCACTTGGGCCCCACATCTTAAGCTGCCTTCTGCCTTCTGCTTCCCCCAATGTAGCCTAGTTCCCTCCTGTTTTGTCTGCCGGAGTGGTATTTACAGACCCCAACTGTGGGGTAGAACTCGGACCCACAGACTACTAAGAGGCTACCTAATTTTAACACCTCAGAATTCTCTGAGACCTGCTTCTTACTCTCTTGGGTGCTCAGTGGACTTTACTGACTGGTA…	AGGCTCCTTCTGCCCTTCGGACACAAAACTCACCCCTGAGCTAAGCTGGAGTTTTCCCCACTCCCATGGCCAGCCTGGGTGGCCCCCTCATTCCCAACTCTATATGGTTCCCAGTAGTGACTGGACACTGGGAGTTTGTGAAACCCTGCCTTCTTCACCTCAACCTGTGCTGTTTCTCACTTGGGCCCCACATCTTAAGCTGCCTTCTGCCTTCTGCTTCCCCCAATGTAGCCTAGTTCCCTCCTGTTTTGTCTGCCGGAGTGGTATTTACAGACCCCAACTGTGGGGTAGAACTCGGACCCACAGACTACTAAGAGGCTACCTAATTTTAACACCTCAGAATTCTCTGAGACCTGCTTCTTACTCTCTTGGGTGCTCAGTGGACTTTACTGACTGGTA…
chr1	94083914	94083915	81	12.5	B6xCAST	AAGATTTTAATCAAATAATCATCCTTGCAACTTAAACTACTACCAGGAAGACTTGTGGGGAAAGCATTTCCCTGGCAGCCTTGGTAGAGTAGGTTTACAAATAGTTACTAGGTTGCCAAAGGCAGCTTTACTGCCACCCCTACCCCCCTTTCTTATTTTCTCTCCCTCTGTCATTCTTCATTTTGTAGATGATGAGAAATTCAATTCATTAAAACCTGTGTGCATCATTATTGTTTTGATTCTAATTTTGACCAAAGGGAACATCTTCAAATTGGTGTCATGTTGGTTTTGACTAGATTAGGTTTGCACATTGCATTTCATTTCAACTCTAAGAGGATTTGATTTAGATTTGCCCTTTAAATCACCTAGACATATTTAATCATGTATATTCACTAAAAA…	AGATTTTAATCAAATAATCATCCTTGCAACTTAAACTACTACCAGGAAGACTTGTGGGGGAAAGCATTTCCCTGGCAGCCTTGGTAGAGTAGGTTTACAAATAGTTACTAGGTTGCCAAAGGCAGCTTTACTGCCACCCCTACCCCCCTTTCTTATTTTCTCTCCCTCTGTCATTCTTCATTTTGTAGATGATGAGAAATTCAATTCATTAAAACCTGTGTGCATCATTATTGTTTTGATTCTAATTTTGACCAAAGGGAACATCTTCAAATTGGTGTCATGTTGGTTTTGACTAGATTAGGTTTGCACATTGCATTTCATTTCAACTCTAAGAGGATTTGATTTAGATTTGCCCTTTAAATCACCTAGACATATTTAATCATGTATATTCACTAAAAA…
chr1	105864284	105864285	188	22.5	B6xCAST	GGACAGATGGAGGTCACCATTCTCTAAGAACTACAATCAGTGATGGATCTCTATCAGTCAGAGGCGCTTCTCATGCTCAGACAGGTAAGTTGTCATAGAGTGGATGGTCACTTGCAAAACAGAGTAGGCACTGTCCCTTTCCTCTTCAGATATGCTGTCCCCAAACCTGTTTATATCAAACATTTTAATTTATTTGTCTTTTGTTTGTTTGTTTGTTTTGACAAGGTCTCACTATGTAGCCTTGGCTGGCCTAGTACTCTGCTATGTAGACCAGGTTGGCCCCAAACTCAATAAGATCTGCTTGTTTCTGCTTCCTGAGTGCTGGCATTAAAGACTTATGCCACCACATCTGGCTATATAAGGCATTTTAATGAAAGTTTATTTAGAATAGCATTAATA…	GAGGTCACCATTCTCTAAGAACTACAATCAGCGATGGATCTCTATCAGTCAGAGGCACTTCTCATGCTCAGACAGGTGAAGTTGTCATAGAGTGGATGGTCACTTGCAAAGCAGAGGAGGCACTGTCCCTTTCCTCTTCAGATATGCTGTTCCCAAACCTGTTTATATCAAACATTTTAATTTATTTGTCTATTGTTTGTTTGTTTGTTTGTTTGTTTTGACAAGGTCTCACTATGTCGCCTTGGCTGGCCTAGTACTCTGCTATGTAAACCAGGTTGGCCCCAAACTCAATAAGATCTGCTTGTTTCTGCTTCCTGAGTGCTGGCATTAAAGACTTATGCCACCACATCTGGCTATATAAGGCATTTTAATGAAAGTTTATTTAGAATAGCATTAATA…
chr1	113317343	113317344	213	25	B6xCAST	TCTTTTCTTTTTTTTTTAACCTGCTTTTGGAGTATCAATAAAAGACTGGGGCAAGAGAAAGGCAAGAGAGCCAGTAAAGAGAATGTGAAGAATGAGTGAGGAGAGAACATGAAGAGTGAGTGAAAAGAAAATGTGAGGCATGTATGAAAAGTATGTGTGGGAGTGAAAGAAGAGTGCATGTGGTGTATGATATGTGTGTGAAGTGTGTGTGTGTGTGTGTGTGCGAGTGAAAGGGGAACACACAGAGGGGTGTGTGAGTGTGAGAGTTCAAGAAAAGAAAAGCACATAGGGGAAAAGCAGAGAGCACAAGTGAATTCAGAGTGTGCAGCCTCAAGCTGCAAGCAAATGAGTGAGAGGGAAAGAGAGCAGAGAATGAGAGAGAAGAGAAAGAAACTTTAA…	TTCTTTTCTTTTCTTTTTTTAACCTGCTTTTGGAGTATCAATAAAAGACTGGGGCAAGAGAAAGGCAAGAGAGCCAGTAAAGAGAATGTGAAGAATGAGTGAGGAGAGAACATGAAGAGTGAGTGGAGAGAAAATGTGAGGCATGTATGAAAAGTATGTGTGGGAGTGAAAGAAGAGTGCATGTGGTGTGTGATATGTGTGCGAAGTGTGTGTGTGTGTGTGTGTGCGAGTGAAAGGGGAACACACAGAGGGGTGTATGAGTGTGAGAGTTCAAGAAAAGAAAAGCACATAGGAGAAAAGCAGAGAGCACAAGTGAATTCAGAGTGTGCAGCCTCAAGCTGCAAGCAAATGAGAGAGAAAGAGAGCAGAGAATGAGAGAGAAGAGAGAGAAACTTTAAG…
chr1	130214760	130214761	342	40.5	B6xCAST	TATAGCAGCTCCTTCTATCAAATGGCTTGCAGGAGCTTTAAAGGATGACAGTGTGGAGATGTTATACTTTCCACCAAAATAAAAAGTTTATGGTAGGAATTTTTTTTTACCGTATGCCAGGATATGTTAAACTAAAAGCAATCTATAATAAAACTTCGGAGGACTTCTAAGAAAAGCAGAAAAACAGCTTCCCTAAGCACTCCTTTTCATGGTGAACTTCTGAGCATCTTTCATCAGTGTCAGGGATTTTGAAATGTTCTCTGTCTCAGGTTCTCCTGGGAATGAACACCAGATAGTGATTTGCTCAAGTTGCCTACCAGGTGAGCTCATGGTTAGCCTGGACACAGTGCCTAGAAGAAACTCTGGGTAACTATGTCCATTCTGCCAACACATTTGGTG…	ATAGCAGCTCCTTCTATCAAATGGCTTGCAGGAGCTTTAAAGGATGACAATGTGGAGATGTTATACTTTCCACCAAAATAAAAAGTTTATGGTAGGAATTTTTTTTTTACCGTATGCCAGGATATGTTAAACTAAAAGCAATCTATAATAAAACTTCGGAGGACTTCTAAGAAAAGCAGAAAAACAGCTTCCCTAAGCACTCCTTTTCATGGTGAACTTCTGAGCATCTTTCATCAGTGTCAGGGATTTTGAAATGTTCTCTGTCTCAGGTTCTCCTGGGAATGAACACCAGATAGTGATTTGCTCAAGTTGCCTACCAGGTAAGCTCATGGTTAGCCTGGACACAGTGCCTGGAAGAAACTCTGGGTAACTATGTCCATTCTGCCAACACATTTGGTG…
chr1	133295292	133295293	137.5	17.5	B6xCAST	CTCAGGAGAGACGCCAGGCCAAGGAGGTGGTTCATAGGGTCAGACCGAGCATTCACTAAGCACTGGGTTTGTGCTAGGCTCAGTACGAAGGGGCCAGAGTGGCCGACCTCCAGGGGCTTAGCTGTCATGATGCTCACAGCCACTTTATAGAGGACTGGTCAGAGGCGGCAGGGAACTTGGGGCCATGTGCCTCTGGAAAGTCACAGAGAAGGCAATGGCACTTCCTTAGGAAGCATAATCACACTTACCACCATGGCTGAGAGGACTAGGTGTTTAGGATTCCTTCTGCTTTTCTTCCTTGCTACATGCAAACAGAAGAATGGAAAGATGATCCCCCTCCTTCCCCTCCCCCCCAAAAAAGACAAGGCAGACAAGGACTTGAGAGCTATTTCATCTCTA…	GCAGCATTGCCAGGGGGGCAGGCTCAGGAGAGACGCCAGGCCAAGGAGGTGGTTCATAGGGTCAGACCGAGCATTCACTAAGCACTGGGTTTGTGCTAGGCTCAGTACGAAGGGGCCAGAGTGGCCGACCTCCAGGGGCTTAGCTGTCATGATGCTCACAGCCACTTTATAGAGGACTGGTCAGAGGCGGCAGGGAACTTGGGGCCATGTGCCTCTGCAAAGTCACAGAGAAGGCAATGGCACTTCCTTAGGAAGCATAATCACACTTACCACCATGGCTGAGAGGACTAGGTGTTTAGGATTCCTTCTGCTTTTCTTCCTTGCTACATGCAAACAGAAGAATGGAAAGATGATCCCCCTCTTCCCCCCCCCCCCAAAAAAGACAAGGCAGACAAGGAC…
chr1	139195304	139195305	95	11	B6xCAST	GGTACAGGACCACAGCATCATGCCCAGGTATTCTGTTGGCTAGAGCAATAGTACAGATCACAGACCCAGTGTAAATTCAGGAGGACGACAGGCTCAGGGCCAGCGGGAGATGAGTGAATGGAACCTACCATCCTAATTATGAATTGCAAAAGAAACCAGGAAACAGGAGTGGGTGGGTTGGTGAGCAGGGGGAGGGGGGAGGGGAATAGGGGAGTTTCAAAGGCGAAACCAGGAAAGGGGATAAATGTAAATTAAAAAAAATGAAATGTCAATTAAAAAAATGAAATGTAAATTCGAAAAATATCTTATTTAAAAAAAAGAGGCAATGTGAGCTGAAGGGCACACCACTTGCGATGTTAGTGTTGGACTTCTGGGTTTAAGGTGAGGTCTGCCTTCTAA…	GTACAGGACCACAGCATCATGCCCAGGTATTCTGTTGGCTAGAGCAATAGTACAGATCACAGACCCAGTGTAAATTCAGGAGGACGACAGGCTCAGGGCCAGCGGGAGATGAGTGAATGGAACCTACCATCCTAATTATGAATTGCAAAAGAAACCAGGAAACAGGAGTGGGTGGGTTGGTGAGCAGGGGGAGGGGGGAGGGGAATAGGGGAGTTTCAAAGGCGAAACCAGGAAAGGGGATAAATGTAAATTAAAAAAAAATGAAATGTCAATTAAAAAAATGAAATGTAAATTCGAAAAATATCTTATTTAAAAAAAAGAGGCAATGTGAGCTGAAGGGCACACCACTTGCGATGTTAGTGTTGGACTTCTGGGTTTAAGGTGAGGTCTGCCTTCTAA…
chr1	142160305	142160306	58	5	B6xCAST	GGATGATTAACACAGGCAGGAGAAAAAACATGATAAAAATATGTTGTATGGAAAAATTTAAATGAAGAATAAATTTATTAAAAATGAGTGAAAAACAAATATTCATTTCACGTGTATTTTAAATTTTTTACAGAATCCTTTATGCCATACCTTTATAAAGTAATTAGTTTTATTTTTAAGTGGTAAATTGTCATCATTTAGTATTGATGTAAAATATCAGATGGAATAGAATATATTTCTTAGAATTATGTTTTGGCTTGACTAAATATGTCTGCTTTGCTTTTTTCTTCCCCTAATGAAATCTATTCTAAATTTAAATTAAATTCCAGGGAGTTAAAGTCAAGATTTTAAAATCTTTAGATATACACCAGAGGATTCACTGAATACAATTTTCTATTT…	GATTAACACAGGCAGGAGAAAAAACATGATAAAAATATGTTGTATGGAAAAATTTAAATGAAGAATAAATTTATTAAAAATGAGTGAAAAACAAATATTCATTTCACGTGTATTTTAAATTTTTTACAGAATCCTTTATGCCATACCTTTATAAAGTAATTAGTTTTATTTTTAAGTGGTAAATTGTCATCATTTAGTATTGATGTAAAATATCAGATGGAATAGAATATATTTCTTAGAATTATGTTTTGGCTTGACTAAATATGTCTGCTTTGCTTTTTTCTTCCCCTAATGAAATCTATTCTAAATTTAAATTAAATTCCAGGGAGTTAAAGTCAAGATTTTAAAATCTTTAGATATACACCAGAGGATTCACTGAATACAATTTTCTATTTTTTT…
chr1	156260956	156260957	222	21.5	B6xCAST	TGCACCAAAATTAGCAGCTAAGCACAGGAAAGGAAGGAGCCCTTCTTTCTCAGTACCACGGATGAAAGAAAGCCTGGGTATTTTCTTGTCAATAGTTTGAATCTTTCTGGAATCTGCAATGCACAAGTCCCAGAATGGGATGCAAGGAGCCTGGTAGGCACAGGTGGAGCAGGACTGCGGAGCTCTGGACTGAACTTTTGGCGCCACCCTAAGCTTACTGTTTTCTAACACTCTGAATCAACGTCATATATGCTGTGGTCTCTCCCTCTATTAGGGTGCTTTTCCTTCAGTAGCTGTAAGTATAAGATCTCTGTTAATCAAGCTAGAAGACAGGCTACTAAAGCAGTAAGATGCGTAAAGTTGAACAAATCGCATATATATGTTATATATACAATTTGC…	GCACCAAAATTAGCAGCTAAGCACAGGAAAGGAAGGAGCCCTTCTTTCTCAGTACCACGGATGAGAGAAAGCCTGGATACTTTCTTGTCAATAGTTTGAATCTTTCTGGAATCTGCAATGCACAGGTCCCAGAATGGGATGCAAGGAGTCTGGCAGGCACAGGTGAAGCAGGACTGCGGAGCTCTGGACTGAACTTTTGGCGCCACCCTAAGCTTACTGTATTCTAACACTCTGAGTCAACGTCATATATGCTGTGGTCTCTCCCTCTACTAGGGTGCTTTTCCTTCAGGAGCTGTTAAGTATAAGATCTCTGTTAATCAAGCTAGAAGACAGGCTACTAAAGCAGTAAGATGCGTAAAGTTGAAGAAATCGCATATATATGTTATATATACAATTTGC…
chr1	165499045	165499046	63	4	B6xCAST	CCTCTCCTATCTAAACTCTCTCCAGCCCATGGGAGTCCTTCTCCCCAGTCACCCATCCTCCTTATAACCCTACTGTTTCTCCCTGTTTCTCTCTGTCTCTGTCTCTGTCTGTATCTCTCTCTGTGTTCCACTCCTGCTTCCATCATGGACAGGTCCAGCCTGCTGCCCATGTTCTGTTTTGTTGTTATTGTGGTCTTAGAAATTGAACCCAGGTCTGCTTACATGCCAAACTCACTTTTTGCCACTGAGCTATGTTCCCATTCCTAGATTTTATTCTTATTTTTAAAACACTTCTAGTCTCTAAAATATTCATTTTAGAGGTCTCTATACATTTTAAAGTTTGTTCATTAAACAGGCTAATGTTTCCCTTACTTCTTAAAAAATACAAAGAAAGGTATG…	CCTCTCCTATCTAAACTCTCTCCAGCCAATGGGAGTCCTTCTCCCCAGTCACCCATCCTCCTTATAACCCTACTGTTTCTCCCTGTTTCTCTCTGTCTCTGTCTCTGTCTGTATCTCTCTCTGTGTTCCACTCCTGCTTCCATCATGGACAGGTCCAGCCTGCTGCCCATGTTCTGTTTAGTTGTTATTGTGGTCTTAGAAATTGAACCCAGGTCTGCTTACATGCCAAACTCACTTTTTGCCACTGAGCTATGTTCCCATTCCTAGATTTTATTCTTATTTTTAAAACACTTCTAGTCTCTAAAATATTCATTTTAGAGGTCTCTATACATTTTAAAGTTTGTTCATTAAACAGACTAATGTTTCCCTTACTTCTTAAAAAATACAAAGAAAGGTATG…
chr1	180109369	180109370	85.5	13.5	B6xCAST	CAGAAGGAAGAGGGTTTGGCATGAGGACTTGGGTAATTTTTTTCAAGTTGATGAATATTCATTATTAAGACCAATTTCATAATGGGCTTGGCAAAAGGCAAAGAAAGCAGGAAATTTCAAAGGATTCATTGTTTCCAAATTCTCCAGTGCGGCCTCAGTGTGGTATAGAATAATAAAAAGACAAACAATTTGAGTTGAAAGTTATGCATTATTAGATGGAATAACGGGTGTCTAAGTACTGTAGTATCTTGTTGAGACACTCACGCCTTCAAACTGCCTTCCAGCTGACTTCACTGTATGAGAGCTTAAGTTTGCGCAACCAGCACTTAGAAGAAGAAGTCAAAGATCTAGCAGATAAGAAGGAATCAGTTGCCCACTGGGAAGCCCAAATCACAGAGA…	GCAGAAGGAAGAGGGTTTGGCATGAGGACTTGGGTAATTTTTTTCAAGTTGATGAATATTCATTATTAAGACCAATTTAATAATGGGCTTGGCAAAAGGCAAAGAAAGCAGGACATTTCAAAGGATTCATTGTTTCCAAATTCTCCAGTGCGGCCTCAGTGTGGTATAGAATAATAAAAAGACAAACAATTTGAGTTGAAAGTTATGCATTATTAGATGGAATAACAGGTGTCTAAGTACTGTAGTATCTGTTGAGACACTCACGCCTTCAAACTGCCTTCCAGCTGACTTCACTGTATGAGAGCTTAAGTTTGCGCAACCAGCACTTAGAAGAAGAAGTCAAAGATCTAGCAGATAAGAAGGAATCAGTTGCCCACTGGGAAGCCCAAATCACAGAGA…
chr1	181435852	181435853	150.5	22.5	B6xCAST	TGCATCCAACAAAGGAATCCCTCATTTTCATGTAACTTCTTAACCACTGCCTTCCACCAGCCTTTGCCACAGCACCACTGCAGACAGTGTGGGAAATGGCAGTTACTTTGCTATCACAGAAATTGAGGCATTTTGTTTTTGTTTTTGTGTTTTGTTTTTGTTCCCTGTGGCCTTCGCCTCCTTTGCCGAGTCTGGCTAGCCATATCTGCTTTGTCATAAGCACAAGGTCTGCCACATGCCCTGTGTTTTCCTTCTGCCTGTGTGGCTGGCCTTTTCCTGGCATCTCCATCTGCTTTCCTTTCGTTCCTTGTTTCTGAGTACCGGTCACACCAAGGCCATAGCTCTGGGCTTGTTCTAGCCTGCTTGCTCTCCACTCCCCTAAGACATTAGATCAAATCC…	TGTACCCAACAAAGGAATCCCTCATTTTCATGTAACTTCTTAACCACTGCCTTCCACCAGCCTTTGCCACAGCACCACTGCAGACAGTGTGGAAAATGGCAGTTACTTTGCTATCACAGAAATTGAGGCTTTTTGTTTTTGTTTTTGTGTTTTGTTTTTGTTACCCGTGGCCTTCACCTCCTTTGCCGAGTCTGGCTAGCCATATCTGCTTTGTCTTAAGCACAAGGTCTGCCACATGCCCTGTGTTTTCCTTCTGCCTGTGTGGCTGGCCTTTTCCTGGCATCTCCATCTGCTTTCCTTTCGTTCCTTGTTTCTGAGTACCGGTCACACCAAGGCCATAGCTCTGGGCTTGTTCTAGCCTGCTTGCTCTCCACTCCCCTAAGACATTAGATCAAAGCC…
chr1	183600710	183600711	111.5	6.5	B6xCAST	TTGGGGTACACTGTTTGAATTGACTGAGAGCTAAAGGGAGGGGCACAAGTGTCTGCTTAGAATACGTCATTTCTGACAGGAGGGTTACAGATAGAGTTTTATCGGAAGAGAACATTTGAAATTGCTAGACATCCTAGAAAGACATAAAGTTCTAGAGCCTGCTAGATTAGACCCTGGTATTTACCCCTGACATGTAAGGCTTTGCTAACCTACTTGCCTTCTGAAATACATAGCTGCTCTTTGTATAAAAAGAATATCAATCATTGTGGGGAGTTATCATGAAAATAACGAGTCAGTGGACGTAATGCCCTGAGCTGTTCATATTTAGTAGAGAGTGAGTACTTGGTAAGTGGCAGTTTACAAAGAGGGATTGTGGAATTGCAGCATGTTGGCGTCATT…	TTGGGGTACACTGTTTAAATTGCCTGAGAGCTAAAGGGAGGGGCACAAGTGTCTGCTTAGAATACGTCATTTCTGACAGGAGGGTTACAGATAGAGTTTTATCAGAAGAGAACATTTGAAATTGCTAGACATCCTAGAAAGACATAAAGTTCTAGAGCCTGCTAGATTAGACCCTGGTATTTACCCCTGACATGTAAGGCTTTGCTAACCTAATTGCCTTCTGAAATACATAGCTGCTCTTTGTATAAAAAGAATATCAATCATTGTGGGGAGTTATCATGAAAATAACAAGTCAGTGGACGTAATGCCCTGAGCTGTTCATACTTAGTAGAGAGTGAGTACTTGGTAAGTGGCAGTTTACAAAGGGGGATTGTGGAATCGCAGCATGTTGGCGTCATT…
chr1	188816780	188816781	108.5	16	B6xCAST	TACATGGTCATGAAAATTGTTAAGTGTCTGATGAGTCCATTTTCTGTGCACTGTATGTATTTAGGGCTCAAAACTAGGATTCGATAATCTGTCCGGAAGCCCATCCCTTCATTAATTGAATTCATTAATTGCCTGGATTCATCAGTGTATGCTGTCAGATGTGGAGTTGGTAAAAATCTCTTCCCATTCCGTGTGCTATCATTTTATCATCTTGACAATGTCCTTTCCTTTACAGAAGCTTTTCAGTATCAAGAGGTCCTATTTGTTAATTGTTGATCTTGGTGCCCGAGTTATTGTTCCATTCAGGAAGCCCTCCCATTCGCCAATGCACTCACGGCTGTTCCCTGCTTTCTCCTCTATCAGGTTTTGTTGAAGATGCTTTCTTTGTTCCCATTGTAT…	TACATGGTCATGAAAATTGTTAAGTGTCTGATGAGTTCATTTTCTGTGCACTGTATTTATTTAGGGCTCAAAACTAGGATTCGATAATCTGTCCGGAAGCCCATCCCTTCATTAATTGAATTCATTAATTGCCTGGATTCATCAGTGTATGCTGTCAGATGTGGAGTTGGTAAAAATCTCTTCCCATTCCGTGTGCTATCATTTTATCATCTTGACAATGTCCTTTCCTTTACAGAAGCTTTTCAATATCAAGAGGTCCTATTTGTTAATTGTTGATCTTGGTGCCTGAGTTATTGTTCCATTCAGGAAGCCCTCCCATTCGCCAATGCACTCACGGCTGTTCCCTGCTTTCTCCTCTATCAGGTTTTGTTGAAGATGCTTTCTTTGTTCCCATTGTAT…
chr1	189214662	189214663	348	61.5	B6xCAST	CCCTCCTTTCTTCCTCCTTTTAGCTGCTTTCTCAGATGTTTTATCTCAGAAGCACAGCAGGCAATAAAGTAAGAGACAGATAGGATGGAGTGTGTGATGTCATATTGAAGGGTGGGCATCTAGATGGCATTCTCTTTCCTTTGAGTGGTGTTAGAGGTGACACATAGTCAACCCTCCTGACCCACATCTTTGCTAACATTCCCTGGCTTCACTGCAACTGGAAGCAGAGACAAACAAACTATCTTTCACTTTTGCAGACGTGAGGTTTTGGTTTTGTTTTGTTTCTTTTTTTGTTTGATTTCACTAGGGAACCAAACCCCAAGTCTAAATCCTCAGTCTACCACCTGTCACTACACATGTGTTTCTCAAGCGCTGCTTTAGGGTAATGTTCTTTGTGGA…	CCCTCCTTTCTTCCTCCTTTTAGCTGCTTTCTCAGATGTTTTATCTCAGAAGCACAGCAGGCAATAAAGTAAGAGACAGATAGGATGGAGTGTGTGATGTCATATTGAAGGGTGGGCATCTAGGTGGCATTCTCTTTCCTTTGAGTGGTGTTAGAGGTGACACATAGTCAACCCTCCTGACCCACATCTTTGCTAACATTCCCTGGCTTCACTGCAACTGGAAGCAGAGACAAACAAACTATCTTTCACTTTTGCAGACGTGAGGTTTTGGTTTTGTTTTGTTTCTTTTTTTGTTTGATTTCACTAGGGAACCAAACTCCAAGTCTAAATCCTCAGTCTACCACCTGTCACTACACATGTGTTTCTCAAGCGCTGCTTTAGGGTAATGTTCTTTGTGGA…
chr1	190998242	190998243	151.5	13	B6xCAST	CTTCAGTTTTTTCTTTAGTCCTGTGTTATGGGTTATACAACAATCGTAAGAACCATTATTTCCGGATCACAAGAGGACCTAAGCTTTGTTCCTTTGCTGCCCAGGTCCCTTGGCCACCATCTCCTGAGTGCATGTGTCACCAGGTCTTCTGAATTTGTTTTGTGCATCTTGTGTGACATATATGGAAATGGCTAGATACTGTGGTCTATTTATTAGCAGCTATTATAAACAAGAACAGATTAATACGCTACAACACCATGCCTCTCAAATCAGCCAGACTGCTTCTTACATGTGGATATCACCACAAGAGCACAGTGGGCCAGCATCACTGAGAGGCAGTTATATGCCTTCTGCAGAAAAATAATCCTCACAAGTTAGTAATATTAATTTAAAAAAAAG…	GCTTCAGTTTTTTCTTTAGTCCTGTGTTATGGGTTATACAACAATCGTAAGAACCATTATTTCAAGATCACAAGAGGACCTAAGCTTTGTTCCTTTGCTGCCCAGGTCCCTTGGCCACCATCTCCTGAGTGCATATGTCACCAGGTCTTCTGAATTTGTTTTGTGCATCTTGTGTGACACATATGGAAATGGTTAGATACTGTGGTCTATTTATTAGCAGCTATTATAAACAAGAACAGATTAGTACGCTACGACACCATGCCTCTCAAATCAGCCAGACTGCTTCTTACATGTGGACATCACCACAAGAGCACAGTGGGCCAGCATCACTGAGAGGCAGTTATATGCCTTCTGCAGAAAAATAATCCTCACAAGTTAGTAATATTAATTAAAAAAAAG…
chr10	13728061	13728062	161	17.5	B6xCAST	TTAGGTTATTAGATGGCAACGACATTGTCTCAGACCCACTCTCCTTGAGATGGTCTCCATGCTCCTGAATACCCTATAACAGTTTAAAAAAAATCTAGTTGCTTCTGACTTCCTTTGGGAAACTCTGATTAAAGGCTCCGATTCACTGATGCATCGAGGAGGGAGAGGAGGGGGAAGTGCACTGAGTTTTTGCTTTATTTAACTCACAGAGCTTCACTCCAGCTGAAGGGATGAGCTGGCCTTGCACACGGCACATCAGCTGTGCGGGTGGGAGGCGCCCGCCCCTTTGATTTTCATCAATGATCTCTTCTGTGTTTGCAGTGGCCACCTAGAAAAGCTGCTCTCTGAGGGTGGTGGGGAGGATGGCTGTCCTCCTACCACACTACAAAACACTACCAG…	TAGGTTATTAGATGGCAACGACATTGTCTCAGACCCACTCTCCTCGAGATGGTCTCCATGCTCCTGAATACCCTATAGCAGTTTTAAAAAAAATCTAGTTGCTTCTGACTTCCTTTGGGAAACTCTGATTAAAGGCTCCGATTCACTGATGCATCGAGGAGGGAGAGGAGGGGGAAGTGCACTGAGTTTTTGCTTTATTTAACTCAGAGAGCTTCACTCCAGCTGAAGGGATGAGCTGGCCTTGCACACGGCACATCAGCTGTGCGGGTGGGAGGCGCCCGCCCCTTTGATTTTCATCAATGATCTCTTCTGTGTTTGCAGTGGCCACCTAGAAAAGCTGCTCTCTGAGGGTGGTGGGGAGGATGGCTGTCCTCCTACCACACTACAAAACACTACCAG…
chr10	14625869	14625870	259	17	B6xCAST	CATACCTTAGACATCATTCCTCTTGGGGGAAACCAGATCTTGGGGTTCAAGATTTAGTATGCACAGTTCCAGACCAATCCCCAACAAGGAAGTGTGAAAAGATTAAAGAAAATGCTGACGGTAAGGGGAATAAGAGGAGTGGTGACCACAAAGCAAGACTGCCCCAACTAAACCTTTAACTTGTGAAAAGGAGTTAAAGAAAATGAAAATGAATAGTTTAGGGTCCTATGTGGTAATACAGGCCTTTACTCCCAGCATTCTGGAGTCAGAGGCACGTGGATTTCTGAGTTTGAAGCCAGATGTTCTACAGAGCAAGTTTCAGGATAGTCAAGCTTAGGCAGGGGGAGAAATTAGAAAAGTTAGAAACCTGATGAAAATGTATTGGAATGAGGATGCCAT…	CATACCTTAGACATCATTCCTCTTGGGGGAAACCAGATCTTGGGGTTCAAGATTTAGTATGCACAGTTCCAGACCAATCCCCAACAAGGAAGTGTGAACAGATTAAAGAAAATGCTGACGGTAAGGGGAATAAGAGGAGTGGTGACCACAAAGCAAGACTGCCCCAACTAAACCTTTAACTTGTGAAAAGGAGTTAAAGAAAATGAAAATGAATAGTTTAGGGTCCTATGTGGTAATACAGGCCTTTACTCCCAGCATTCTGGAGTCAGAGACACGTGGATTTCTGAGTTTGAAGCCAGATGTTCTACAGAGCAAGTTTCAGGATAGTCAAGCTTAGGCAGGGGGAGAAATTAGAAAAGTTAGAAACCTGATGAAAATGTATTGGAATGAGGATGCCAT…
chr10	20619579	20619580	143	11	B6xCAST	CCACAGGACACCACCATTCATAGTACATTTGAATCAAGTAGTCTTCTTACCTAGCATGCAAACACATTTGACACTCTGTTCAGGGCTCTCAAACAAGACTTCGCCACACCTCTGTAACAGAAAGACAGCTCTAGTTACTCCAAGATTGCAAACGAGAATTCTCAAGCCAATATAATATGTCCATGCAACTACCATCACCGTGATATTGTTCTATTCTTGTTTTCTTTAGTTACCTGGGCCCAGGGACTTCTGTCATAAAGAGAGATTTCCCTGGAGAAAAACCTTTGAGAGGTCAGTCTAGGATTGGCTGTTCCAGGATGCTGCCTGTCCCTGCTAACAGCAACTCTGTGCTCCCATGAGAAGCCATGGCTTGGGCTGAACCTCATTTTTGACAGTTTT…	CCACAGGACACCACCATTCATAATACATTTGAATCAAGTAGTCTTCTTACCTAGCATGCAAACACATTTGACACTCTGTTCAGGGCTCTCAAACAAGACTTCGCCACACCTCTGTAACAGAAAGACAGCTCTAGTTACTCCAAGATTGCAAACGAGAATTCTCAAGCCAATATAATATGTCCATACAACTACCATCACCGTGATATTGTTCTATTCTTGTTTTCTTTAGTTACCTGGGCCCAGGGACTTCTGTCATAAAGAGAGATTTCCCTGGAGAAAAACCTTTGAGAGGTCAGTCTAGGATTGGCTGTTCCAGGATGCTGCCTGTCCCTGCTAACAGCAACTCTGTGCTCCCATGAGAAGCCATGGCTTGGGTTGAACCTCATTTTTGACAGTTTT…
chr10	21411775	21411776	188	21	B6xCAST	TTCATGGAGATAGAAGTGGGGATCCCTAGAGTGGGTAGAAGAAGAGGAGAAGGGAGAATATGAGGCAGGGAAGGAGGAAGAGGAGAGGAGATAGTGTTATGAGAAACAGCGTCTTAGTGGGCATGAGGACAGTGTTTTGGGAAAATGCTGCAATAGTCATACAACATGAATGTTACAGAACTGTGTACTTAAGATGGTAAGTTTTGTATCAAATATATTTTACTTCAGTAAAAGTTTAAAATCCAGAGTGGCCAGAGTCAACCATTATCAATATAGGAAGCATGGGTCTTTATGGTCATGAGAAGAAAAGGCCAGGTGGGCACCCAGTACAGTGACCTGGAAACTGTTATTCTCCAGTTCTTCTGTGCACTGTTGGACGAGTCCCCAGCCTCCCCCAAA…	TTCATGGAGATAGAAGTGGGGATCCCTAGAGTGGGTAGAAGAAGAGGAGAAGGGAGAATATGAGGCAGGGAAGGAGGAAGAGGAGAGGAGATAGTGTTATGAGAAACAGCGTCTTAGTGGGCATGAGGACAGTGTTTTGGGAAAATGCTGCAATAGTCATACAACATGAATGTTACAGAACTGTGTACTTAAGATGGTAAGTTTTGTATCAAATATATTTTACTTCAGTAAAAGTTTAAAATCCAGAGTGGCCAGAGTCAACCATTATCAATATAGGAAGCATAGGTCTTTATGATCATGAGAAGAAAAGGTCAGGTGGGCACCCAGTACAGTGACCTGGAAAGTGTCATTCTCCAGTTGTTCTGTGCACTGTTGGATGAGTCCCCAGCCTCCCCAAAA…
chr10	24006623	24006624	116	7	B6xCAST	GTGGGGAATGGCTGCTGAGTTAGTGGCAAAGGTCTGCTCAGGACACCTCTGATCCTATGATCTTGGGCATGATAGAGTGCCTTCGAGTGGATCTTCCTCTGGGTGTTGTGGGACTGGCTGCAGAGTTTGCACCCAAGATCTGCTCAAGACACTGGCTCAGAACCAGAAGGAACCACTGGTCGGGCAGAGTTCCTGGGTGCCTGGGTCCCACTGGTTTTAGTTACACTTGGTGCTGGGTTAGATGCTGTGTCCTCCTCACCTATGATCCTATGATCCTGGGTGTATTAGACTGCTTGGGAGTAGAGCTTCCTCTGGGTGTTGTGGGAGTGGCTCTGATCCTATAATCCTGGGAGTGTTGGAGCTTCTGGGAGTGGTTCTACATCTGGGTATTGTTCATAT…	TCTGCGTGTTGTGGGGAATGGCTGCTGAGTTAGTGGCAAAGGTCTGTTCAGGACATCTCTGATCCTATGATCTTGGGCATGGTAGAGTGCCTTCGAGTGGATCTTCCTCTGGGTGTTGTGGGACTGGCTGCAGAGTTTGCACCCAAGATCTGCTCAAGACACTGGCTCAGAACCAGAAGGAACCACTGGTCGGGCAGAGTTCCTGGGTGCCTGGGTCCCACTGGTTTTAGTTACACTTGGTGCTGGGTTAGATGCTGTGTCCTCCTCACCTATGATCCTATGATCCTGGGTGTATTAGACTGCTTGGGAGTAGAGCTTCCTCTGGGTGTTGTGGGAGTGGCTCTGATCCTGTAATCCTGGGAGTGTTGGAGCTTCTGGGAGTGGTTCTACATCTGGGTA…
chr10	31463199	31463200	146	16	B6xCAST	TGGCAATAGCCATAGATGTTGGTACTGGAATTGCAGGTCAAACAACTTCCATGACCCAATATAATACATTCACTTCCCAATTTAAAAGCGATCTTCAAGAATGACTGAGGCTGTGCTTACTATCCAGAAACAGATCGATTCTCTGGTAGCTGTGGTGCTTCAGAACTGATGGGGGCTAGATGCCCTGACAGATAAAGACGGTGGCCTTTGCCTGTTCCTCCAAGAAGAATGCTGTTTCTACATCAACCAATCTGGGATAGTGAGAAATAAAATCCAGGAGCTACAGTCAGACATAAAGAATTTCAAGGAACATGAATTTCTGGGATTTTCGAAAACCCTATATGGAAGTGGATACTACCTTTTGTAATGCCTTTTCTAGTCATCCTCCTGGTGTTATTA…	ATAGCCATAGATGTTGGTCCTGGAATTGCAGGGAAAACAACTTCCATGACCCAATATAATACATTCACTTCCCAATTTAAAAGCGATCTTCAAGAATGACTGAGGCTGTGCTTACTATCCAGAAACAGATCGATTCTCTGGTAGCTGTGGTGCTTCAGAACCGATGGGGGCTAGATGCCCTGACAGATAAAGACGGTGGTCTTTGCCTGTTCCTCCAAGAAGAATGCTGTTTCTACATCAACCAATCTGGGATAGTGAGAAATAAAATCCAGGAGCTACAGTCAGACATAAAGAATTTCAAGGAACATGAGATCCCCATTTCTGGGATTTTCGAAAACCCTATATGGAAGTGGATACTACCTTTTGTAATGCCTTTTCTAGTCATCCTCCTGGTGTTAT…
chr10	36248635	36248636	251	27	B6xCAST	GGGCACTCGTGATCAATTATTCTTTGCATTTTGGCCAGTTGTGGATCTCTGTAACAGTCATTTATTTGACTCACAGGTGTGAAAGGGAGAGAGTACAACATTTCAGAATTCCTATCCATGTTATTTGATGGGGACCCAGACCTGTAGCTTAAAATTCTATCAAAGTCGGTGCCTAAACTGACCTTCTCTACTCTTAGGCATATGAAGCCCGGCTCTGGGCTGCCTACTTTCCTGAATCACGCTATTTGATGTTACTTAATGGCATTCTCAACCACAGTGGAAGGAAAGGGAATGGAGGAGGAAGATTCTATTGATTTTTTATTTTAAGCCATAAGTAGAAATATTTCACAGTTTTTTTAATCACTCTACTTACAGAATGCCAAACATCATGTATGACAA…	CACTCGTGATCAATTATTCTTTGCATTTTGGCCAGTTGTGGATCTCTGTAACAGTCATTTATTTGACTCACAGGTGTGAAAGGGAGAGAGTACAACATTTCAGAATTCCTATCCATGTTATTTGATGGGGACCCAGACCTGTAGCTTAAAATTCTATCAAAGTCGGTGCCTAAACTGACCTTCTCTACTCTTAGGCATATAAAGGCAGGCTCTGGGCTGCCTACTTTCCTGAATCACACTATTTGATGATACTTAATGGCATTCTCAACCACAGTGGAAGGAAAGGGAATGGAGGAGGAAGATTCTCTTGATTTTTTATTTTACACCATAAGTAGAAATATTTCACAGGTTTTTTTTTAATTACTCTACTTACAGAATGCCAAACATCATGTATGACAA…
chr10	36416933	36416934	58.5	11	B6xCAST	AGTGTAAAATTGAGCTCATTTTAAAGATAAGTTTTCATGAGATGGAACCAACACTGGAAATGAACTGGAGCCTGGGAATATTTTTACCTTAATCCATTGCATTTGTCCAATAATTATTGTCAATCTCTTGTAAATAGTAGCCATTTGCCTGTGTACCATGTGTGCACTTTTAACATAAAAGAAAAGCATTGTTTCTGACTCAGTAACAAAATATCAAAATTAGTTACAAAAGTTCATGTATACAGAACTCCCTCTATCTCTCCTGTCTTCTCTTATAGCATCATAGAACAAAATAAATACTGGTAAAGAATTTATCTCTAAACTTTTATTTGAATTTTACTGAGTGTCTCCAAATATATCAAATTTTTATACCTTGATCACACCCAAGATACCACATTT…	AGTGTAAAATTGAGCTCATTTTAAAGATAAGTTTTCATGAGATGGAACCAAGACTGGAAATGAACTGGAGCCTGGGAATATTTTTACCTTAACCCATTGCATTTGTCCAATAATTATTGTCAATCTCTTGTAAATAGTAGCCATTTGCCTGTGTACCATGTGTGCACTTTTAACATAAAAGAAAAGCATTGTTTCTGACTCAGTAACAAAATATCAAAATTAGTTACAAAAGTTCATGTATACAGAACTCCCTCTATCTCTCCTGTCTTCTCTTATAGCATCATAGAACAAAATAAATACTGGTAAAGAATTTATCTCTAAACTTTTATTTGAATTTTACTGAGTGTCTCCAAATATATCAAATTTTTATACCTTGATCGCACCCAAGATACCACATTT…
chr10	39274492	39274493	103	13.5	B6xCAST	AGCAATTATTAGAACCTCGAATTTAATTCTGTTCCACAAATAAACCCAATGTGTTCACATGGATTATCTGTACATTTAGTCTTTGCTTCGTGAACATCTTACGAGTTGCATGTCACTTCACTTTGGACTCTCAGTGTCTAGGACCTAGGTTACAAAACAGACAGATCAAAACCCAGCAACTTCATTAAGCCTTTCAGTGTAGTCGTTTTTTACACTTCAAAATGAAGTCACCTTGCTTTTTATCTTTGCATTACAACATACCTGTGTTAGACCACAAACCCTCTAGTTCTCCCCTCCCCTTTCTGGTGTGGGTTCCTGCCCCCCCCCCCCGACACACACACACACAACACACACACACACACACACACACTTCTCCCTCCATGAAATTCACTTTGCATA…	GCAATTATTAGAACCTCGAATTTAATTCTGTTCCACAAATAAACCCAATGTGTTCACATGGATTATCTGTACATTTAGTCTTTGCTTCGTGAACATCTTACGAGTTGCATGTCACTTCACTTTGGACTCTCAGTGTCTAGGACCTAGGTTACAAAACAGACAGATCAAAACCCAGCAACTTCATTAAGCCTTTCAGTGTAGTCGTTTTTTACACTTCAAAATGAAGTCACCTTGCTTTTTAATCTTTGCATTACAACATACCTGTGTTAGACCACAAACCCTCTAGTTCTCCCCTCCCCTTTCTGGTGTGGGTTCCTGCCCCCCCCCCCCGACACACACACAACACACACACACACACACACACACACACTTCTCCCTCCATGAAATTCACTTTGCATA…
chr10	39336084	39336085	426	13.5	B6xCAST	AAGATGCTTTAATCCAGAGGCTCTCAGCCTTCCTGATGCTGTGGCCCTTTAATACAGTCCTCATGTTACCGTGACCACCCCCAACCCCTGCAACCATAAGATTATCTTGTTGCTACTTTATACTAATTTTTCTAGTGTTATAAATTGTAATATAAATATCTGATATGCAGCCCTTCAAGGGTCACGACCCACAGATTGAGAAGCACCCACAGGATGGCCATCATTTAAAAATGTGAAAAATAAATGCTGAATAGGATATAAAGCTTCCTGAACCATGTGTTCTGTTGAAAAGAATGTGAAACAATAAATTTGGGGTTGAAAGTTTTTCAGGAAATGCAGGTGTTGGGGATGGAATAGAGACTGAGAAAATGGCCAACCAATAACTGGCCCAACTTGAGA…	AACATGCTTTAATCCAGAGGCTCTCAACCTTCCTGATGCTGTGGCCCTTTAATATAGTCCTCATGTTATGGTGACCACCCCCAACCCCTGCAACCATAAGATTATCTCATTGCTACTTTATACTAATTTTTCTAGTGTTATAAATTGTAATTTAAATATCTGATATGCAGCCCTTCAAGGGTCACGACCCACAGATTGAGAAGCACCCACAGGATGGCCATCATTTAAAAATGTGAAAAATAAATGCTAAATAGGATATAAACCTTCCTGAACCACGTGTTCTGTTGAAAAGAATGTGAAACAATAAATTTGGGGTTGAAAGTTTTGCAGGAAATGCAGGTGTTGGGGATGGAATAGAGACTGAGAAAATGGCCAACCAATAACTGGCCCAACTTGAGA…
chr10	42336366	42336367	354.5	17.5	B6xCAST	TCAGAGTCAGCCAAGTCACATAGAGGGAGACAGTGCTCTAGCCCTGCTCCTCTCCCCAGACTCCTGAAATTCTGCATTGTTAATACCACCATCAATCTCACCAGAGGGGCGAGGGAAAGGTTCAAAGACTGGGACCTTGATGGCAGAGACAAGTGCCAAAATTTTAACTTTTACTCCTTCACTCAGACTTCAACACTGGTGACAAACATTGCTCATTGTTTTAACTTGAAATGACAGTTTCCACTCATTTCCAAGAAATGTCTGTCAAACACTGTGGGGAAACGTCTGCCAAGTGGAAATACCACACTCTGTCACTCAGGCTTCTATGTAATCTTTAAGGGAGGGAAAAAACTGAAAGCCAAGAGCTTTGTCTTAAGGCGACCACGGTATTTGGCATAC…	TCAGAGTCAGCCAAGTCACATAGAGGGAGACAGTGCTCTAGCCCTGCTCCTCTCCCCAGACTCCTGAAATTCTGCATTGTTAATACCACCATCAATCTCACCAGAGGGGCGAGGGAAAGGTTCAAAGACTGGGACCTTGATGGCAGAGACAAGTGCCAAAATTTTAACTTTTACTCCTTCACTCAGACTTCAACACTGGTGACAAACATTGCTCATTGTTTTAACTTGAAATGACAGTTTCCACTCATTTCCAAGAAATGCCTGTCAAACACTGTGGGGAAACGTCTGCCAAGTGGAATAACCACACTCTGTCACTCAGGCTTCTATGTAATCTTTAAGGGAGGGAAAAAACTGAAAGCCAAGAGCTTTGTCTTAAGGCGACCACGGTATTTGGCATAC…
chr10	75426957	75426958	263	43	B6xCAST	TTTGATACATATGCAGCTAGAGTCAAGAGCTCTGGGGTACTGGTTAGTTCATAATGTTGTTCCTCCGATAGGGTTACAGATCTCTTTAGCTCCTTGGATACTTTCTCTAGCTCCTCCATTGGGGGCCCCGTGATCCATCCAATAGTTGACTGTGAGCATCCACTTCTGTGTTTGCTAGGCCCCGGCCCAATTCATTTTTTTTAATCCTATGAAGAATATCAAACTTGTCATCTGCCATGCTTTTGCCTATACAATTCAACTCTATGAAATGTGTCCTCTCTGCTGTACTGTCAAGATCTTGAATTGGAGAAATCTAAAACACTGTAGCCATTGGAGATTCTCCTAGTACCTCTCCCTTCCTGCCCCTGAGAAGCAAATTCTCCTTTCTATTTCTGTGAA…	TTTGATACATATGCAGCTAGAGTCAAGAGCTCTGGGGTACTGGTTAGTTCATAATGTTGTTCCTCCGATAGGGTTACAGATCTCTTTAGCTCCTTGGATACTTTCTCTAGCTCCTCCATTGGGGGCCCCGTGATCCATCCAATAGTTGACTGTGAGCATCCACTTCTGTGTTTGCTAGGCCCCGGCCCAATTCATTTTTTTTAATCCTATGAAGAATATCAAACTTGTCATCTGCCATGCTTTTGCCTATACAATTCAACTCTATGAAATGTGTCCTTTCTGCTGTACTGTCAAGATCTTGAATTGGAGAAATCTAAAACACTGTAGCCATTGGAGATTCTCCTAGTACCTCTCCCTTCCCGCCCCTGAGAAGCAAATTCTCCTTTCTATTTCTGTGAA…
chr10	78666587	78666588	817.5	80.5	B6xCAST	GTATGAGAGAGAGAGGAGAGAAGAAGACAAAGAGAGAGGAGTGAGAGAGTGAGGAGGGGCCAAGCAGCCCCTCTTATAGTGGGCTGCTTTATTTTACTGTTGCTAGGTAACTGGGGAGGAGTTTAGCCTGAAGGTCAGAAGCTTGGGACATTGCCTACATAACTACTAACCATGCTTCTCTTGTCAGGGTTGAGGGGGTGGTAACTTAGACAGGAGCCAGAGTTCCCGGAGACATGAGAGAACTCCTTGCATCCCATGTAGGTGAATTATCACCACCGGGTCCCGGGGTTCAGACCTCAGCTCAACTGGAAACCAGACTGTCTGTGTATAGCCCAGTGCCCCACAGTCTTTGCCTGATCCTCCAAGAAGAATGCTGTTTCTATGTCAACCAATCTGAGA…	TAAGAGAGAGAGAGGAGAGAAGAAGACAAAGAGAGAGGAGTGAGAGAGTGAGGAGGGGCCAAGCAGCCCCTCTTATAGTGGGCTGCTTTATCTTACTGTCGCTAGGTAACTGGGGAGGAGTTTAGCCTGAAGGTCAGAAGCTTGGGACATTGCCTACATAACTACTAACCATGCTTCTCTTGTCGGGGCTGAGGGGGTGGTAACTTAGACAGGAGCCAGAGTTCCAGGAGACATGAGAGAACTCCTTCCATCCCATGTAGGTGAATTATCACCACCGGGTCCCGGGGTTCAGACCTCAGCTCAACTGGAAATCAGACTGTCTGTGTATAGCCCAGTGCCCCACAGTCTTTGCCTGATCCTCCAAGAAGAATGCTGTTTCTATGTCAACCAATCTGAGAT…
chr10	88321158	88321159	110.5	15	B6xCAST	CAGAACTGTATCTTGAACTGGGTATAATGGCTCACATCTGTAACCTCAGCGTTTGGAAAAAAACAGGATTGCTGCAAGTTCAAGGCTAAAAAGTTAGGTTCAGGCCAGCCTGGGTTCCAGAATTAGATCCTATTTCCTTAATGGATCTTTCCTATCAGAGAGCAGCAATCCACTTCTAATGAAAAAGTACAGAGGTGGAACCCGCTCGGGGTTGGAGGAGCATACCAAATTGCTTGCTGAGAGGGAGTGCCTATGTCACAGGCTTCCCAAGGCACCTCTGGGCAAGCACCCTGGCCTCAGCCTCATAGAGTGCCAGTATCTGCTTCCAGCCTTTGCAAGCATCGACCTTGGAGGTCGCTGCCATCTCCAATACAAGCTTGGGGTTCTGTTGCCCTTCGT…	TCAGAACTGTATCTTGAACTGGGTATAATGGCTCACATCTGTAACCTCAGCGTTTGGAAAAAACAGGATTGCTGCAAGTTCAAGGCTAGAAAGTTAGGTTCAGGCCAGCCTGGGTTCCAGAATTAGATCCTATTTCCTTAATGGATCCTTCCTATCAGAGAGCAGCAATCCACTTCTAATGAAAAAGTACAGAGGTGGAACCTGCTCGGGGTTGGAGGAGCATACCAAATTGCTTGCTGAGAGGGAGTGCCTATGTCACAGGCTTCCCAAGGCACCTCTGGGCAAGCACCCTGGCCTCAGCCTCATAGAGTGCCAGTATCTGCTTCCAGCCTTTGCAAGCATCGACCTTGGAGGTCGCTGCCATCTCCAATACAAGCTTGGGGTTCTGTTGCCCTTCGT…
chr10	96633046	96633047	528.5	57	B6xCAST	AGGACATGCTTGAACTTCTGACGATCCTGTCTCTACCCCACCACGGGCTGGGATTACAGTCACCTGCAACACTGCTAGTTTATGAGGGATTGGGGATAAGCGTAGGGGATAATGCTAGGCAGGCAGTCTAGCGTCTGACCTATGCTTGCTCCCAGCCTAGTAGTTGTTTGTTTGAGATGGGGATCTTTCTGCATATCCCTAGCAGTCCCGGAAAAACTCATTACCTGGCCTCCACCTCACAGAGCTCACCCTGCCTCTGCCTCTCGACTGCTGGGATTAAAGGCTTGCACATCCACCTCTGGCTCTTGTTTTTGTCTCTGAGGTCTTGTTACATAGCCCCGGGCTCATACCCCGCTTGCTTCAGTTTCCCAAGAGCTGGAACTTCAGGCATGAATAACC…	CATGCTTGAACTTCTGACGATCCTGTCTCTACCCCACCACGGGCTGGGATTACAGTCACATGCAACACTGCTAGTTTATGAGGGATTGGGGATAAGCGTAGGGGATAATGCTAGGCAGGCAGTTTAGCGTCTGACCTATGCTTGCTCCCAGCCTAGTAGTTGTTGTTTGTTTGAGATGGGGATCTTTCTGCATATCCCTAGCAGGCCCTGAAAAACTCATTACCTGGCCTCCACCTCACAGAGCTCACCCTGCCTCTGCCTCTCGACTGCTGGGATTAAAGGCTTGCACATCCACCTCTGGCTCTTGTTTTTTGTCTTTGAGGTCTTGTTACATAGCCCCGGGCTCATACCCTGCTTGCTTCGGTTTCCCAAGAGCTGGAACTTCAGGCATGAATAACC…
chr10	116982833	116982834	436.5	27	B6xCAST	CCAGCAGGAGTTGATGAAAGAATGGGCAGTGGTGTAAAGAGGACATTTTAGAAAGCCCTTCATGTTTGGGGCCTTTTGCAAGGAAGGAATCTTATCAGCTGCAATGCGCAGCAGCAGGTAGAACACTCATTAGGAAAAAGATGGCCCTCACAGTTAGAAGCACATTTACAGGACTATGAAACCTGAGTTGAATTTGTCGTTATTTTTCTATTGCTGTGATAAGACACCATGACCACGGCAACTTATTTTAAGAAGCATTTATTGGGGGGATATAGTTAGTTTCAAGGGTTAGATTCTATGACTGTCATGGTGGGAGGGGCATAGCCTTGGGTTCGTAGCTACATCTTGATTGGAAGCACCAGGCAGAGCAGAGAGAAAGGGAGGGGGGAGGAGGAACAG…	CAGCAGGAGTTGATGAAAGAATGGGCAGTGGTGTAAAGGGGACATTTAAGAAAGCCCTTCATGTTTGGGGCCTTTTGCAAGGAAGGAATCTTATCAGCTGCAATGCGCAGCAGCAGGTAGAACACTCATTAGGAAAAAGATGGCCCTCACAGTTAGAAGCACATTTACAGGAGTATGAAACCTGAGTTGAATTTGTCGTTATTTTTCTATTGCTGTGATAAGACACCATGACCACGGCAACTTATTTTAAAAAGCGTTTATTGGGGGTATATAGTTAGTTTCAAGGGTTAGATTCTATGACTGTCATGGTGGGAGGGGCATAGCCTTGGATTCGTAGCTACATCCAGATTGGAAGCACCAGGCAGAGCAGAGAGAAAGGGAGGGGGGAGGAGGAACAGG…
chr10	119994290	119994291	331.5	42.5	B6xCAST	TCTGCTAGCCAACCAACTGATGAAGCAGGCTAACCTGTGCCAAGTTGTACTGGTTGCTTTCTGTGTTCTTTTGGCTTTTGATCTTTAAGTCTATAATTTACCTTGTCCAGATGTGATTTGTTCTAATTTAGCATATGTGTGTAACCTAACTGCCTGTGAAAGTTTCCTATTGAAAGGACGGATCTCAGTGTGTCCAAGGACTGTGATAATTTGTTGAAAAACTACAAGTTATCTCATTTAGTCATGTATTTGAGCTATAAACTATAACTTCCTGTGGTGACAAAAATCAATGTATAGTGCATAAGTTATTTCAAAGCTAAGTGAAGTAGCCTAGTTAGCTCAGAGCACCTCCGTCTCTCTCTAGATGGAGCTTACAGATCATTTGTTTTACTGGAATGA…	TTTCCCTTGCTAGCCAACCAACTGATGAAGCAGGCTAACCTGTGCCAAGTTATACTGGTTGCTTTCTGTGTTCTTTTGGCTTTTGATCTTGAAGTCTACAATTTACCTTGTCCAGATGTGATTTGTTCTAATTTAGCATATGTGTGTAACCTAACTGCCTGTGAAAGTTTCCTATTGAAAGGACGGATCTCAGTGTGTCCAAGGACTGTGATAATTCGTTGAAAAACTACAAGTTGTCTCATTTAGTCATGTATTTGAGCTATAAACTATAACTTCCTGTAGTGACAAAAAATCAATGTATAGTGCATAAGTTATTTCAAAGCTAAGTGAAGTAGCCTAGTTAGCTCAGAGCACCTCCGTCTCTCTCTAGATGGAGCTTACAGATCATTTGTTGAATGA…
chr11	3981715	3981716	411	16.5	B6xCAST	TACACATAACCAAGTCCTTGGATGCCTCTGGAACACATCTGTTCTCAGAAAACACTTCCCAGAAGATTTCGCCTCAGTGATGCTGATCTCTTGTTTGATTTCGAGACAGAGTTTCTCTGTGTAGATCTGACTGTCCTAGAACTCTATAGACCAGGCTGACCTCAGACTCAGAGATCTGCCTGCCTCTGCCTCCAAGTGCTGGGATTAAAGGTGTGCCACTATCAGCAGGCTCTAGTCTGAATTCTCACTAAGCTCTTAGCTCCAGGTTAACCAGCATCGACTGTTCCAGTAGCGCAAAGGTTTCTCTTCAATGGTGCTGCTGCTCTCTTGTGTATTGTGGCTGACTTTAGCTCCAGCTGCTCCGAACAACAGAATCTCAATTCATGATAGAAAATAACC…	CTACACATAACCAAGTCCTTGGATGCCTCTGAACACATCTGTTCTCAGAAAACACTTCCCAGAAGATTTCGCCTCAGTGATGCTGATCTCTTGTTTGATTTCGAGACAGAGTTTCTCTGTGTAGATCTGACTGTCCTAGAACTCTATAGACCAGGCTGACCTCAGACTCAGAGATCTGCCTGCCTCTGCCTCCAAGTGCTGGGATTAAAGGTGTGCCACTATCAGCAGGCTCTAGTCTGAATTCTCACTAAGCTCTTAGCTCCAGGTTAACCAGCATCGACTGTTCCAGTAGCGCAAAGGTTTCTCTTCAATGGTGCTGCTGCTCTCTTGTGAATTGTGGCTGACTTTAGCTCCAGCTGCTCCGAACAACAGAATCTCAATTCATGATAGAAAATAACC…
chr11	5835269	5835270	564.5	73	B6xCAST	CGGACTTGTTTCACTTCTTCACATGTTCCATGCTCCAGCAGCTCCTGGGACAGAAACAAAACAAAACTCTGAGCCCAAGGCAGAGTTCCCTCCGTACCCTGCAAAGAGAGGCTCTGTAGTGTTAGGGACCAGCAGGACTTGGAAACTGAGACTGTGCCCAGGGAGGTCACCAAAGCTTTAAGGCACAGCTGGTGTGGCAGGGATGCCAGCTATAAAGCCTTTCAGGGTCAGAGGTATGGTTCACTCATCATACACGGCCCAGGATAGACCAACGTTTCCCTTTAGAAACATGTATGTCTTCATCTGAAAGCAGCTTTTGCCACTATAGGTTCTTCAGGAAAAAGTATCCAAAAGGCTGTTTCGATGTTGGGCCCTCAAAAACCACTCCAGGATGCTTTC…	CGGACTTGTTTCACTTCTTCACATGTTCCATGCTCCAGCAGCTCCTGGGACAGAAACAAAACAAAACTCTGAGCCCAAGGCAGAGTTCCCTCCGTACCCTGCAAAGAGAGGCTCTGTAGTGTTAGGGACCAGCAGGACTTGGAAACCGAGACTGTGCCCAGGGAGGTCACCAAAGCTTTAAGGCACACCTGGTGTGGCAGGGATGCCAGCTATAAAGCCTTTCAGGGTCAGAGGTATGGTTCACTCATCATACACGGCCCAGGATAGACCAATGTTTCCCTTTAGAAACATGTATGTCTTCATCTGAAAGCAGCTTTTGCCACTATAGGTTCTTCAGGAAAAAGTATCCAAAAGGCTGTTTCGATGTTGGGCCCTCAAAAACCACTCCAGGATGCTTTC…
chr11	9497698	9497699	101.5	11.5	B6xCAST	AGTGGCCTCATTTCAAAATGATGACTTGCCATTTGTTAAGCTCAGGTGACTAAGCTGAATCATACATTATTGAGTCAGTAGGCCTGGGGCGGAGGGCCCACATTATGTCCTTCTAACAAGCTCCCAGAAGGTGGTGTTTATCCACACACACCTCCAGGTCTTATCCTGCTCTTCCTAAAATAACCAATTTTTGTTCTAGTTGCTCTCTGCTACTTTTCAGCAGTACATTGCTAAGGTGAACTCAACTACATTCCACCCCAATTTGTATATGCCAATGCCCCAGTCCTAGTCTTGAATACAAAATGCTTAAAGCAATTGATTATGGTTGCAGTTAAATGAAATCACATGGATAGATGCTCATCCAATATAACTGGTGCTCTAGCAGGAGGTGATCGAGCC…	AGTGGCCTCATTTCAAAATGATGACTTGCCATTTGTTAAGCTCAGGTGACTAAGCTGAATCATACATTATTGAGTCAGTAGGCCTGGGGCGGAGGGCCCACATTATGTCCTTCTAACAAGCTCCCAGAAGGTGGTGTTTATCCACACACACCTCCAGGTCTTATCCTGCTCTTCCTAAAATAACCAATTTTTGTTCTAGTTGCTCTCTGCTACTTTTCAGCAGTACATTGCTAAGGTGAACTCAACTACATTCCACCCCAATTTGTATATGCCAATGCCCCAGTCCTAGTCTTGAATACAAAATGCTTAAAACAATTGATTATGGTTGCAGTTAAATGAAATCACATGGATAGATGCTCATCCAATATAACTGGTGCTCTAGCAGGAGGTGATCGAGCC…
chr11	12285849	12285850	91	9.5	B6xCAST	TTTATGTCAGCACTTAATTATCTAACTTTATACCAGGAAATGGCTGAGACATGTCTCAAGGGTGTTGCCCCTGGAAGAAGGGAATCCCAAGTTTTTGATTGTGTGCAGCAGAGCTGCATTGTGTTGCTTGATATTAAGACCTTGTCATTATCTATACTTGGAGAGTAAGTGTGGTTTAAAGGCATCCATGTGGTCAGGGGTGAACTCTTGACAGTTGTTTATATGTCATCTGATGAGTCGAAGTGAGGAAACTATTTGTAGGGTGTCTGAGGCTGCTGTGGAGACATTAGCATGTTAATTAGTATAGATTATAAGAAAAAGACATGCCTTCTGGAGGTCAGGCTTCACAGAATGAAGCATCCAATCTGCCCAGGGTCAGAAGACAACAAAATGCTTTGT…	TTTATGTCAGCACTTAATTATCTAACTTTATACCAGGAAATGGCTGAGACATGTCTCAAGGGTGTTGCCCCTGGAAGAAGGGAATCCCAAGTTTTTGATTGTGTGCAGCAGAGCTGCATTGTGTTGCTTGATATTAAGACCTTGTCATTATCTATACTTGGAGAGTAAGTGTGGTTTAAAGGCATCCATGTGGTCAGGGGTGAACTCTTGACAGTTGTTTATATGTCATCTGATGAGTCGAAGTGAGGAAACTATTTGTAGGGTGTCTGAGGCTGCTGTGGAGACATTAGCATGTTAATTAGTATAGATTATAAGAAAAAGACATGCCTTCTGGAGGTCAGGATTCACAGAATGAAGCATCCAATCTGCCCAGGGTCAGAAGACAACAAAATGCTTTGT…
chr11	12305098	12305099	279.5	12	B6xCAST	AGATCCCACTGAAGGCATGGAAATTCCTTTATGAGGAATGATGTTTTAAAAATGAAAGCAGGAGGAGATACATAGGAGTTTGGAGGTAGCATGAAAATATCTCTGCTAAGAATCCATGTGGCCTCAAGCAGCCAGAATTCTGATTAGGAGAGTAGGTGAGGAGCGTATAATACTTTATATGCCCACCACTTTTGCCTTTCACAAGACAAGGTTAGAGGAGTAACTAGATGGCTGCTTTATGGAACAACATTTCCTTTTTTTCTTTTTTCCTATTTTTTAAATCCTGAATTAAAAAAGGCAAGTTGTAGTCTGCCTGATTGGGTGGGTGATCCATTTTCAATGTTGTAAGCAACTGACAGGCCAGTTCTGCTAATTAGGCAACATGACAGCTTTTCATTG…	CAAGATCCCACTGAAGGCATGGAAATTCCTTTATGAGGAATGATGTTTTAAAAATGAAAGCAGGAGGAGATACATAAGAGTTTGGAGGTAGCATGAAAATATCTCTGCTAAGAATCCATGTCGCCTCAAGCAGCCAGAATTCTGATTAGGAGAGTAGGTGAGGAGTGTATGATACTTTATATGCCCACCACTTTTGCCTTTCACAAGACAAGGTTAGAGGAGTAACTAGGTGGCTGCTTTATGGAAAACATTTCCTTTTTTTTTTTTTCCTATTTTTTAAATCCTGAATTAAAAAAGGCAAGTTATAGTCTGCCTGATTGGGTGGGTGATCCATTTTCAATGTTGTAAGCAACTGACAGGCCAGTTCTGCTAATTAGGCAACATGACAGCTTTTCATTG…
chr11	13660539	13660540	114	21	B6xCAST	AGTGAAAAGAGTTCTGCCATCAGAATAGATTTGACTCTCATCAAGACTATACTATAAGGATGAAATGAAATTTGTTACAGCACACCTTTCCTGTGTGTTTCAAAATTCAGTCTTAAGGTACAGCCTGTCAACAAACAAGATTAAATCTGGAATCTTTAGAAACTCTCCAATAAATTGTTCTTCAAGGCACAGTGGGTTCTCCAGGGAAAGAGACATTGATTTTCTTTGTAAGAGTAAAATAGGAGTATCAGGACTTGAGGTCTTGCCACAATTGATAGGAAAGAAAGAAGAAAATAATTACATTCCATAATACCATAAGACCTAAACCTGCACAGTGACAAATGAGAGCAAACTGATTGTGTGAAACAAGAAACCATTTTTCCAAATGCAGTTTTTTAA…	GAAAAGAGTTCTGCCATCAGAATATATTTGACTCTCATCAAGACTATACTATAAGGATGAAATGAAATTTGTTACAGCACACATTTCCGGTGTGTTTCAAAATTCAGTCTTAAGGTACAGCCTGTCAACAAACAAGATTAAATCTGGAATCTTTAGAAACTCTCCAATAAATTGTTCTTCAAGGCACAGTGGGTTCTCCAGGGAAAGAGACATTGATTTTCTTTGTAAGAGTAAAATAGGAGTATCAGGACTTGAGGTCTTGCCACAATTGATAGGAAAGAAAGGAGAAGAAAATAATTACATTCCATAATACCATAAGACCTAAACCTGCACAGTGACAAATGGGAGCAAACTGATTGTGTGAAACAAGAAACCATTTTTCCAAATGCAGTTTTTTAA…
chr11	19666985	19666986	581	70.5	B6xCAST	TCCCCAACCCTCAATGAGGTGAAATTCCAGGAAGAACCTGTCCCAGTAATAGAGGAATTAAAAGAGAAAAACACATACAATGCTGCCCTTCATTATAGTCTCTGAATTGTCAGGAAGGGGGCTGAGATCGAGGTGTTGGCGTGACTCTTCTTACAGCTGTGGGACATGAGGAAAAGAGAGCACAAAGAGGATCTGTGCTGACTACCCCCTCAGTGGATCTGAAAGGCAGGCATCTATATGAGAGTTAGACAATAAAGAATGAGGTAAGAAAATAGGAGTGACAGAAGGTGACTTCCGGCCCTGACATTTAATATTGAGGAAGGGAAAAATCCATGACACAACATGGAGATGTGGCCTTACTAACAGGCCCACACAGAAATATAATCAGGAATTGCCAAA…	CCAACCCTCAATGAGGTGAAATTCCAGGAAGAACCTGTCCCAGTAATAGATGAATTAAAAGAGAAAAACACATACAATGCTGCCCTTCATTATAGTCTCTGAATTGTCAGGAAGGGGGCTGAGATCGAGGTGTTGGCGTGACTCTTCTTACAGCTGTGGGACATGAGGAAAAGAGAGCACAAAGAGGATCTGTGCTGACTACCCCCTCAGTGGATCTGAAAGGCAGGCATCTATATGAGAGTTAAACAATAAAGAATGAGGTAAGAAAATAGGAGTGACAGAAGGTGACTTCCGGCCCTGACATTTAATATTGAGGAAGAGAAAAATCCATGACACAACATGGAGATGTGGCCTTACTAACAGGCCCACATAGAAATATGATAATCAGGAATTGCCCAA…
chr11	33660693	33660694	349	19	B6xCAST	CATCCCCGCCCCGTACGGATCCTTGCAACAGCTTTGGAATCTAATCACATGCAAACCACTGTTTCTATTAGAGTGTGCTGACACTGATCCCACCCATTCTTGAAACCTGACTGGAGTTACATAGTAAGCACTCAATGTGAGTTAAGTGAAGAGCATTACTGGAGTACTTAGTAAGCACTCAATATGTGTTAAGTGAACAGCACTACAGGAGTGTAGCAGGAAATAGACTAAGAGTGTTGTGTTACTCATGTGGCCAATTCTGTAATTTGACACTTTAGATTGCAAATCGGTAGTATGCCAGAGCACCATCATTAGCCCAGTTCTTTTTACTGTGAATTCCACCATTTATCTCACATAAAAATTTGGAATGTTGGCTTCTCTAGAAATGCCTGCCATGCA…	CATCCCCGCCCCATACGGATCCTTGCAACAGCTTTGGAATCTAATCACACGCAAACCACTGTTTCTATTAGAGTGTGCTGACACTGATCCCACCCATTCTTGAAACCTGACTGGAGTTACATAGTAAGCACTCAATGTGAGTTAAGTGAAGAGCATTACTGGAGTACTTAGTAAGCACTCAATATGTGTTAAGTGAACAGCACTACAGGAGTGTAGCAGGAAATAGACTAAGAGTGTTGTGTTACTCATGTGGCCAATTCTGTAATTTGACACTTTAGCTTGCAAATCGGTAGTATGCCAGAGCACCATCATTAGCCCAGTTCTTTTTACTGTGAATTCCACCATTTATCTCACATAAAAATTTGGAATGTTGGCTTCTCTAGAAATGCCTGCCATGCA…
chr11	34118520	34118521	130.5	18	B6xCAST	GCCCACAGTTTTCTGTTGAGACCAATGGATCCCCTCTCCCACCTCCTCTCTGACTCATCCTTGCTTTTATGCCCCCACAAGAGTCACCTCAACCAGTAATTGCTCCATCCATTATGCCTTTGTCTTCTTACTTAAGGATGAGCTAGGAGAGGAATGGGGCTTCCCTTGACTTGCTACCAAGCATCTCCCCTACAGTAAAGATGTCTGTTTTCACAGCCTGTTTGCAGCTGTAACACAGGATTGTTATAGAGTGAAATGTTGGTGCCTGGTTCAGTGGAATTATCCAAAGTGTCCTGTTTCAGAGTGGACACAAAAGCTGTATTTCAGTCCTTATCCTTTCTTGGGTCAGTCTTAATGAACTACCCCCACTCCTGCACACCCCCACCTGCCACACTCTGC…	GCCCACAGTTTTCTGTTGAGACCAATGGATACCCTCTCCCACCTCCTCTCTGACTCATCCTTGCTTTTATGCCCCCACAAGAGTCACCTCAACCAGTAATTGCTCCATCCATTATGCCTTTGTCTTCTTACTTAAGGATGAGCTAGGAGAGGAATGGGGCTTCCCTTGACTTGCTACCAAGCATCTCCCCTACAGTAAAGATGCCTGTTTTCACAGCCTGTTTGCAGCTGTAACACAGGATTGTTATAGAGTGAAATGTTGGTGCCTGGTTCAGTGGAATTATCCAAAGTGTCCTGTTTCAGAGTAGACACAAAAGCTTTATTTCAGTCCTTATCCTTTCTTGGGTCAGCCTTAATGAACCACCCCCACTCCTGCACACCCCCACCTGCCACACTCTGC…
chr11	49083407	49083408	175	20.5	B6xCAST	ATCTTTGTATCCTAACATAAATTGCTAGAAGTTCATCGTACTAAACATTACAGGACTTTCACTAATCTTTCCACATTTGAGTTCTTTAAATATATTAATTCAGAAGGTAGAACATGTTTAATCACTCATAACTTACTTACAGCCCCAGAAGCAGAGTTTGAAAGTCTATACTCCCCATCGTCCTTGGGGACATAATCAGAAGTCAGGAGGTCCAGAAAATGCAGATGTGGCCCATAGTTCATTCATCTGAGCTCAGTGTTCTGCATGGTCATTCAAGAATAGACATAAACCAGAGTCAAATGAGGCAGGCAGTGGTTGAGTTCCATGTGACTATGTATGGATGTAAGATGGGGCAAGAGAGTGAGGTGCAGACTCAAGAGGTTTCCAGCCATTTCTGTT…	ATCTTTGTATCCTAACATAAATTGCTAGAATTTCATCGTACTAAACATTACAGGACTTTCACTAATCTTTCCACATTTGAGTTCTTTAAATATATTAATTCAGAAGGTAGAACATGTTTAATCACTCATAACTTACTTACAGCCCCAGAAGCAGAGTTTGAAAGTCTATACTCCCCATTGTCCTTGGGGACATAATCAGAAGTCAGGAGGTCCAGAAAATGCAGACGTGGCCCATAGTTCATTCATCTGAGCTCAGTGTTCTGCATGGTCATTCAAGAATAGACATAAACCAGAGTCAAATGAGGCAGGCAATGGTTGAGTTCCATGTGACTATGTATGGATGTAAGATGGGGCAAGAGAGTGAGGTGCAGACTCAAGAGGTTTCCAGCCATTTCTGTT…
chr11	49103466	49103467	139	14	B6xCAST	TGGCTTAGTCCCTGGTGTGGCAGGCAGACCTGTGTGGCAGACCGTTAACATCTTTGTGGACCAGAAATTACAAAGAGTGGGGATAGAACCAGTGGCTGGCTTGTCACCTTCAAAGAGCAATCCCTGATGACTTCCTTCTGCCAGCTAGGACCCACCTCCTAAAGGACCCAGAGCCTCCTGAAATGACAGCAGCGGGGGGAGGGGGGCAGCAAGCATTCAAAGCAGGAGACCATGCATGGGGGAGGTTTCTGTATTAAGCCATAGCAACAATAAAGAACGGCTGGGGAGAGCTCTGAAAAGTGCAGACGGGAAGGTCAGGTGTTCAAGGTCATCCTGGTGCCAGTAACAACTGGGCTATGTAAGATCCCCTCCCTCCAAATCCAAACCCAAATCAAACAA…	AGAGTGGCTTAGTCCCTGGTGTGGCAGGCAGACCTGTGTGGCAGACCGTTAACATCTTTGTGGACCAGAAATTAGAAAGAGTGGGGATAGAACCAGTGGCTGGCTTGTCACCTTCAAAGAGCTGATGACTTCCTTCTGCCAGCTAGGACCCACCTCCTAAAGGACCCAGAGCCTCCTGAAATGACAGCAGTGGGGGGAGGGGGGCAGCAAGCATTCAAAGCAGGAGACCATGCATGGGGGAGGTTTCTGTATTAAGCCATAGCAACAATAAAGAACGGCTGGGGAGAGCTCTGAAAAGTGCAGACAGGAAGGTCAGGTGTTCAAGGTCATCCTGGTGCCAGTAACAACTGGGCTATGTAAGATCCCCTCCCTCCAAATCCAAACCCAAACCAAACAACC…
chr11	66902060	66902061	154	18	B6xCAST	AGGCAGAAATGAAAGATTCGGAAATCAGAGAAGGCCTTGACCCTCCATGGAGTTCTAGAATAGCTATGCCTGGATGTCTTGGTTACCTTTCCTGTTGGCTTGATAAAATAGGACAGCAAAAGCAACCTAAGGAAGGTAAGGTAGAGTTTATTTTGACCCCAGTCCCAGATGAGAGAGCAAATACGCAGGAAACTGAAGCAGCTGGTCACACAGCATCCGGAAACCATGAATACCTGTGCCCAGCTCAATTCTCCTTTTTATCCAGTAAAGAATTCAGTTATAAGGAATGGTGCTACCCACAGTGGGCAGGACTTTCCAACCCAATTAACCTAATCAAGATAAGCCCTTGCAGGCATGCCTAGAGCACTCTCTCACAGGGATTCTAGACCTCATCAAGCT…	GCAGGCAGAAATGAAAGATTCGGAAATCAGAGAAGGCCTTGAACCTCCATGGAATTCTAGAATAGCTATGCCTGGATGTCTTGGTTACCTTTCCTGTTGGCTTGATAAAATAGGACAGCAAAAGCAACCTAAGGAAGATAAGGTAGAGTTTATTTTGACCCCAGTCCCAGATGAGAGCAAAAAGGCAGGAAACTGAAGCAGCTGGTCACACAGCATCCGGAAACCATGAATACCTGTGCCCAGCTCAATTCTCCTTTTTATCCAGTAAAGGATTCAGTTATAAGGAATGGTGCTACCCACAGTGGGCAGGACTTTCCAACTCAATTAACCTAATCAAGATAAGCCCTTGCAGGCATGCCTAGAGCACTCTCTCCCAGGGATTCTAGACCTCATCAAGCT…
chr11	67038827	67038828	151	8.5	B6xCAST	GTGTGACCAGCAAGGAAACACACCACACACTTGTGAGACCATATGATTGACAGAGCATCCACGTAGTTCCAAGCCAGGCACACGCTGTCAGAGGCCTCTGGGTAAATAGGAAGATGGCCTGTTAAGGAAAAATTAGGAGCAAATTAAATCTTTTTCCATCAAGAAAAAAGACCAAAAGCTAGAATTCAGGAAACCAAACCTAAACACATGCAGACCAAGGTGACAATGCGCTTTGTAGTCTTTGTAGACACTTGGGAAGTGGCAGGAGGAGGGTCATGATTTCAAGACCAGCCTGAGCTATGGAGCAGGCAATCTATAGCCACATCTTTGATAAACAGAATAGACAGATGGGTAGATGGTTCAAATATAAGGTAGAAGATATATTTGTATAGGAAAATG…	GTGTGACCAGCAAGGAAACACACCACACACTTGTGAGACCATATGATTGACAGAGCATCCACGTAGTTCCAAGCCAGGCACACGCTGTCAGAGGCCTCTGGGTAAATAGGAAGATGGCCTGTTAAGGAAAAATTAGGAGCAAATTAAATCTTTTTCCATCAAGAAAAAAGACCAAAAGCTAGAATTCAGGAAACCAAACCTAAACACATGCAGACCAAGGTGACAATGCGCTTTGTAGTCTTTGTAGACACTTGGGAAGTGGCAGGAGGAGGGTCATGATTTCAAGACCAGCCTGAGCTATGGAGCAGGCAATCTATAGCCACATCTTTGATAAACAGAATAGACAGATGGGTAGATGGTTCAAATATAAGGCAGAAGATATATTTGTATAGGAAAATG…
chr11	67360811	67360812	207	29	B6xCAST	CCTCCCGCCATGACTGTGACCTGCTGCGGGAACAGTATGAGGAGGAGCAGGAAGGCAAAGCCGAGCTGCAGAGGGCACTGTCCAAGGCCAACAGCGAGGTGGCCCAGTGGAGGACAAAATATGAGACGGATGCCATCCAGCGCACAGAGGAGCTGGAGGAGGCCAAGTATGACCCAACTTCCCCAATGTAGAAAAGGGCATAGAAATAAGGCCCCAAAGGGCAGTCTCTGCTACCTGGAGAGGATTTCTCTCTTTCCTTGTAGTTTTTCAAGATTTCAGCGAGTATCCCCCACTGTCCTGGGGACTGTCTTTTCCACCTGGATAATTGGTGACTGACTATAGACCGACTTTGCCACTAAGCATTTCAGGATTATTCTGGTCATATAGACATGCAGCGTG…	CCTCCCGCCATGACTGTGACCTGCTGCGGGAACAGTATGAGGAGGAACAGGAAGGCAAAGCCGAGCTGCAGAGGGCATTGTCCAAGGCCAACAGCGAGGTGGCCCAGTGGAGGACAAAATATGAGACGGATGCCATCCAGCGCACGGAGGAGCTGGAGGAGGCCAAGTATGACCCAACTTCCCCAAGGTAGAAAAGGGCATAGAAATAAGGCCCAAAAGGGCAGTCTCTGCTACCTGGAGAGGATTTCTCTCTTTCCTTGTAGTTTTTCAACATTTCAGCAAGTATCCCCCACTGTCCTGGGGACTGTCTTTTCCACCTGGATAATTGGTGACTGATTATAGACCGACTTTGCCACTAAGCATTTCAGGATTATTCTGGTCATATAGACATGCAGCGTG…
chr11	94323465	94323466	364.5	64	B6xCAST	GGTGAATATCTAAGTTTGAGGCCAGCCTGGTCTACAAAACAAGTTTCTGTATAAAGCCATGGCTGTTATACAGAGAAACCCTTTTTCAAAAAGAATGTCTCACTGGGACGTGAGCTCTCTGTCAGCCTGAAAGCCCTACGAATCCTTTTATTTCTGCTTCCTTAGTACTGCAGCTATAAACCACTGTTTTACATGTATGTGCTGGAGGTTAAACTCTGTTCTTCATGCTGAGTGGTGAACTCCCTGGAATTTCTTTAAAAGTATTAATTCGGCCTTGCAAACTTTTAATCCCTAGCAATCCAGAGGCAAGTTGATCGAGGCCAGCCAGGGCTACATAGTGAGACATTGTCTCAAAAACAAGATTCATATTCAGCTAGGAATAGCAGACCGGGCCTATAA…	GGTGAATATCTAAGTTTGAGGCCAGCCTGGTCTACAAAACAAGTTTCTGTATAAAGCCATGGCTGTTATACAGAGAAACCCTTTTTCAAAAAGAATGTCTCACTGGGACGTGAGCTCTCTGTCAGCCTGAAAGCCCTACGAATCCTTTTATTTCTGCTTCCTTAGTACTGCAGCTATAAACCACTGTTTTACATGTATGTGCTGGAGGTTAAACTCTGTTCTTCATGCTGAGTGGTGAACTCCCTGGAATTTCTTTAAAAGTATTAATTCGGCCTTGCAAACTTTTAATCCCTAGCAATCCAGAGGCAAGTTGATCGAGGCCAGCCAGGGCTACATAGTGAGACATTGTTTCAAAAACAAGATTCATATTCAGCTAGGAATAGCAGACCAGGCCTATAA…
chr12	4383325	4383326	261	14	B6xCAST	TGGAGACAGAACTTGAATAAAAATACAAAACTAACAAGAATAATTAAATTATGACAATGGTTTACATTTCTGAAAGATTAAATATCAATCATACACATTAAAATTGGCCACCATACCTTATACTTGGTGGAACTTGGTCTTATTTCAGCCTAATTTATAATTAAGATAAGTATGTTAAGCTAGAATGTGAATTTTCATTGTATTTTTGTGAAAAGTTAAGGCACTTCAAATGTAGAAGGAAAGAAAATAAAAAAATCTGAGTTATTGCAGTGGGAGACAAGAATTAGCTACACAATTCTTCAGAGGCTAATTAAAAACAAAATCTGGGGTTAAGGTTTTTCTAAATTATCTACAGAATAGGCCTGAAAGGCGCCAGGATCTGCTAGCATAGTCTAGTTT…	TGGAGACAGAACTTGAATAAAAATACAAAACTAACAAGAATAATTAAATTATGACAATGGTTTACATTTCTGAAAGATTAAATATCAATCATACACATTAAAATTGGCCACCATACCTTATACTTGGTGGAACTTGGTCTTATTTCAGCCTAATTTATAATTAAGATAAGTATGTTAAGCTAGAATGTGAATTTTCATTGTATTTTTGTGAAAAGTTAAGGCACTTCAAATGTAGAAGGAAAGAAAATAAAAAAATCTGAGTTATTGCAGTGGGAGACAAGAATTAGCTACACAATTCTTCAGAGGCTAATTAAAAACAAAATCTGGGGTTAAGGTTTTTCTAAATTATCTACAGAATAGGCCTGAAAGGCGCCAGGATCTGCTAGCATAGTCTAGTTT…
chr12	32207216	32207217	169.5	29.5	B6xCAST	AGGTGGAGAGAGTCTCCTCTGTCCTCTGCAGGTATACTTGCACACCTGCACACACATATGCTCACACCACACAATATACCGCCCTCACATGTGCACAAAAATATGTTAAACCCTCATCTAGCACAGTGTCTGTCATTTACTGGCTCAAAATGGCAACTGTTTGTAAGTACCCTGAAACTCACAGATGCATAAGACAGTACAGTGGAGGGCAAAGGCTGAGTCCCTAAGGTGCGGTGTGAGACCCTGAACATCACTTTGAGAACAAGCCAATGCCGATGCATTTCCTCTGTTCAGTCTCACACTTCTCTAACCTAGACACCCAATCTTGCTTCATCTTCTCTATTTTCAAACTGTCTGAACCCAGTCTCCCTAGTCAACTTCCTGTCTTCTTTCTTTTCA…	GGTGGAGAGAGTCTCCTCTGTCCTCTGCAGGTATACTTGCACACCTGCACACACACATGCTCACACCACACACATATACCGCCCTCACATGTGCACAAAAATATGTTAAACCCTCATCTAGCACAGTGTCTGTCATTTACTGGCTCAAAATGGCAACTGTTTGTAAGTACCCTGAAACTCACAGATGCATAAGACAGTACAGTGGAGGGCAAAGGCTGGGTCCCTAAGGTGCGGCGTGAGACCCTGAACATCACTTTGAGAACAAGCCAATGCCGATGCATTTCCTCTGTTCAGTCTCACACTTCTCTAACCTAGACACCCGATCTTGCTTCATCTTCTCTATTTTCAAACTGTCTGAACCCAGTCTCCCTAGTCAACTTCCTGTCTTCTTTCTTTTCA…
chr12	42815238	42815239	132.5	14	B6xCAST	TATGTAGTCTGTACCATCCTTAAACTTTCTGTGATTCTCCTTGGCTCAGTCTTCTGAGGTGTGTGATAACAAGCGTGAGGCACAATACTCAATTAGAGACTGATTTATTCTTTCTAACACCCGTCGTTTTACTTTTATTAAGCCATGCTTCTTTTTCTCTTGCTTCTCTGAGAAAATTAAAATATTCCTGAAATCTGTCATTTATTCTACAAGATGTTCCTAAAACATTTCATCTAAGATAATACTCAAACTTTGAAATCCTTTGTGTGAGTAGCTATCATAGAATGTAGACATATGAAAACCTATATATTATTCTATATGCTTTAGTTTTAAGATAAAATTAAGGTATTTTTAAATAAAGCATATGGAAAGTGACATAGCTGTCATTTATTTGATATG…	TATGTAGTCTGTACCATCCTTAAACTTTCTGTGATTCTCCTTGGCTCAGTCTTCTGAGGTGTGTGATAACAAGCATGAGGCACAATACTCAATTAGAGACTGATTGATTCTTTCTAATACCCATGGTTTTACTTCTATTAAGCCATGCTTCTTTTTCTCTTGCTTCTCTGAGAAAATTAAAATATTCCTGAAATCTGTCATTTATTCTACAAGATGTTCCTAAAACATTTCATCTAAGATAATACTCAAACTTTGAAATCCTTTGTGTGAGTAGCTATCATAGAATGTAGACATATGAAAACCTATATATTATTCTATATGCTTTAGTTTTAAGATAAAATTAAGGTATTTTTAAATAAAGCATATGGAAAGTGACATAGCTGTCATTTATTTGTTATG…
chr12	42891729	42891730	223.5	31	B6xCAST	GATATTTTCTAGTTCCATGCATTTGTCTGTGAATTTCATGAAGTTGTTGTTCTTAATAGTTGAGTAATTCTCCATTGTGTAAATATAACACATTTTCTGTACCCATTCCACTGTTGTGGGTCATCTGGGTTGTTTTCAAGTTTTGGCTATTATAAAGAAGGTTGCTATGAACATAGGAGCATGTATCCTTGTTATATGTTGGAGCATCTTTTGAGTATATGTCCAGGAGTGATATAGCTGAATCCTCAGGTAGTTTTATGTCCAATTTTGTGAGGAAGCATCAGATTATTTTCCAGAGTGGTTGTACTAGCTTGCAATCCCACCAACAATGGAGGACTGCTCTTCTTTCTCCACATTCTCGCCAGCATCTGTTGTCACCTAAGTTTTTTATCTTAACCA…	GATGTTTTCTAGTTCCATGCATTTGTCTGTGAATTTCATGAAGTTGTTGTTCTTAATAGTTGAGTAATTCTCCATTGTGTAAATATAACACATTTTCTGTACCCATTCCACTGTTGTGGGTCATCTGGGTTGTTTTCAGGTTCTGGCTATTATAAAGAAGGTTGCTATTAACATAGGAGCATGTATCCTTGTTATATATTGGACCATCTTTTGAGTATATGTCCAGAAGTGGTATAGCTGAATCCTCAGGTATTTTTATGTCCAATTTTGTGAGGAAGCATCAGATTATTTTCCAGAGTGGTTGTACTAGCTTGCAATCCCACCAACAATGGAGGACTGCTCTTCTTTCTCCATATTCTCGCCAGCATCTGTTGTCACCTAAGTTTTTGATCTTAACCA…
chr12	60352356	60352357	151.5	23.5	B6xCAST	TAAAGAAGAAATCAATGTTTGCTACCAGCTAGTTTAGTCATGCAACTAATCCCTACTGGTTGAGATTGGTTAGTTTGTTGGGATAAAATATGTATGTATAAATGCATTGTGATTCTTACTTTCTAATTATCATTCCTGAAATTTTTATATCCTTATATGTTCACAAAGTGAAACCTTTATTTTTTTTCTAGTTGAAAGCTTAAGACAATAATAAGTGAATAAAAAGGATAGGAAGTGGTAAAATCTGAGATAAGACTATAGACTTTCTAGAGAGAGTAATCATCCATGTCATAATGTTTTAACTGGTCCTGGCTTCTGGAAGGGGAAGCTCTAAGAGGCAAGGAAAACAGTTTGTTCAATCCTCCTTTTCTCAAACACCAATTCCAACTGCAGACACAT…	TAAAGAAGAAATCAATGTTTGCTATCAGCTAGTTTAGTCATGCAACTAATCCCTACTGGTTGAGATTGGTTAGTTTGTTGGGATAAAATATGTATGTATAAATGCATTGTGATTCTTACTTTCTAATTATCATTCCTGAAATTTTTATATCCTTATATGTTCACAAAGTGAAACCTTTATTTTTTTTCTAGTTGAAAGCTTAAGACAATAATAAGTGAATAAAAAGGATAAGAAGTGGTAAAATCTGAGATAAGACTATAGACTTTCTAGAGAGAGTAATCATCCATGTCATAATGTTTTAACTGGTCCTGGCTTCAGGAAGGGGAAGCTCTAAGAGGTAAGGAAGACAGTTTGTTCAATCCTCCTTTTCTCAAACACCAATTCCAACTGCAGACACAT…
chr12	69494796	69494797	273	41	B6xCAST	GAACCTACATGGTAGAAGGAGAGAACCGACTTCTAAAAGTTATCCTCTGACCTCCACATGAACAAACATATGCATGAAACAAATAGATAAAAAGCAAAACCTGGAGTAATGTAAGTGTTTGTTGGTGGATGGAGAGGCTAATCCGGGATCCTTCATATATAGCACTAAATACTAAGAGGGAAAGACTGGGAGCTGAAGGGCCTCGTAGGGTATGAGTTAGGCACAGAGCAGCAGCTGCTGCGTTAGTGGCCAAAACAAGCCACTAACTTAGGGAAGGAAGATCCAAGAGGTAGAGAGATAGGTTCTTCACAGACTATCAGTCACATAGAAGAGGGTTTTTATACAACAAGGAGTGGAGCGTGTGTCTTTTTCTTCTCAGTCTATGACATCTCATTTTCT…	GAACCTACATGGTAAAAGGAGAGAATTGACTTCCAAAAGTTATCCTCTGACCTCAACATGAACAAACATATGCATGAAACAAATAGATAAAAAGAAAAACCTGGAGTAATGTAAGTGCTTCTTGGTGGATGGGGAGGCTAATCCAGGATCCTTCATATATAGCACTAAATACTAAGAGGGAAAGACTGGGAGCCGAAGGGCCTGGTAGGGTATTAGTTAGGCACAGAGCATCAGCTGCTGTGTTAGTGGCCAAAACAAGCCACTAACCTAGGGGAGGAAGACCCAAGAGGTAGAGATATACGTTCTTCACAGACTATCAGTCACATAGAAGAGGGTTTTTATACAACAAGGAGTGGAGCGTGTGTCTTTTTCTTCTCAGTCTATGACATCTCATTTTCT…
chr12	70512274	70512275	617.5	35.5	B6xCAST	CAGTAGTCCTCTTTTCCTCCCTCCTTTCCAAGTCTTACTGTGAAAACTTTCAAAAATACATAAAAGAACGGCAGAGTAAAATGTACCTTCCTCGTCCCCACCACTGAGATATGACAGAACCCAACAGCTTTGTATTTGATTCACAAAAGCATTTTAAAACTATCCCAAATATCAAAAAACAAATCTCCAGCTATTCTCTGTGTTTCTAGAAAGTAAGGTTTTCTTAATGTTAGTAATGCTTAATGTTAGTAACACAGCTAACTAAAGAAACAGCAACTGGTGGGAGGTCACCTAGACATAGTTTCCCTAGATGCCTCTGATTGCCAATGGGCTTTTAACGCTTCATCTGCTCACATCAAGATCCAAATACGGTAACTAGAGTGAGATACAAACCAGCAC…	CAGTAGTCCTCTTTTCCTCCCTCCTTTCCAAGTCTTACTGTGAAAACTTTCAAAAATACATAAAAGAAAGGCAGAATAAAATGTACCTTCCTCGTCCCCACCACTGAGATATGACAGAACCTAACGGCTTTGTATTTGATTCACAAAAGCATTTTAAAGCTATCCCAAATATCAAAAAACAAACCTCCAGCTATTCTTTATGTTTCTAGAAAGTAAGGTTTTCTTAAAGTTAGTAATGCTTAAAGTTAGTAACACACCTAACAAAAGAAACAGCAACTGGTGGGAGGTCACCTAGACATAGTTTACCTAGATGCCTCTGATTGCCAATGGGCTTTTAACGCTTCATCTGCTCACATCAAGATCCAAATACGGTAACTAGAGTGAGATAGAAACCAGCAC…
chr13	11292072	11292073	57.5	9	B6xCAST	TGGAAATTTGAAGGTAACACTGAAGGGGAACAAACATACATTTAAATGTTAAGATGCTAATTATAGTGTTCTGGTTAAGCAGTGTGGTTAACAGCAAATGCAAAAGAAGAGGAGAGTTGAGGAGAGGGGAGGGGAGGGGAAGAGAGGGGAGGGGAGGAGAGGAGAGGCGAGGCGAGGCGAGGCGAGGCGAGGCGAGGCAAGGCAAGGCAAGGCAAGGCAAGGCAAGGCAAGGCAAGGCAAGGAAAGGAAAGGAAAGGAAAGGAAAGGAAAGGAAAGGAAAGGAAAGGAAAGGAAAAGAAAAGAAAATGAAAAACAGCAATGCATTTGAATCAGGCAACACTCCCGTTTCAGCAGTAACCATGTATCTTCTTCAGGAAAACCAGAAGAAAACATAAAGAC…	TGGAAATTTGAAGGTAACACTGAAGGGGAACAAACATACATTTAAATGTTAAGATGCTAATTATAGTGTTCTGGTTAAGCAGTGTGGTTAACAGCAAATGCAAAAGAAGAGGAGAGTTGAGGAGAGGGGAGGGGAGGGGAAGAGAGGGGAGGGGAGGAGAGGAGAGGCGAGGCGAGGCGAGGCGAGGCGAGGCGAGGCAAGGCAAGGCAAGGCAAGGCAAGGCAAGGCAAGGCAAGGCAAGGAAAGGAAAGGAAAGGAAAGGAAAGGAAAGGAAAGGAAAGGAAAGGAAAGGAAAAGAAAAGAAAATGAAAAACAGCAATGCATTTGAATCAGGCAACACTCCCGTTTCAGCAGTAACCATGTATCTTCTTCAGGACAACCAGAAGAAAACATAAAGAC…
chr13	11431330	11431331	52	7	B6xCAST	GGTAGATATGTTTCTAGTTGAGACAAAAAAATGGGAAGCGATTACAGGTTGCTATTACCAAGGTGGCCTTTAAGGAGGATCTAAAATTTGACAGAATTTTCACTACAAGTGGGATTTTCATAGGTGAAATAGACTGGCAGAGGCAATAGCTAGTGAGGTGGTTGGGTGCATAAATATTTTACTGACTGGCCTGTTGTTTACTGAAAGCAGTGTGCAAAGGTGTCAGCTGATCTCAAAAGTGCAAATAGACCAGGCTTCTTATTTCTTCCCAGATAACGAGGTTGAAATATTTCCTGTTGTGAGAAAAGGAAGAAAGAAAAAAACAGAAACAAAACTATACACTATACATATGTACATATATTCTCCCTCCTCCTCCTCTTCTCCTTTCTTCTGCTCTTA…	TATGTTTCTAGTTGAGACAAAAAAATGGGAAGCGATTACAGGTTGCTATTACCAAGGTGGCCTTTAAGGAGGATCTAAAATTTGACAGAATTTTCACTACAAGTGGGATTTTCATAGGTGAAATAGACTGGCAGAGGCAATAGCTAGTGAGGTGGTTGGGTGCATAAATATTTTACTGACTGGCCTGTTGTTTACTGAAAGCAGTGTGCAAAGGTGTCAGCTGATCTCAAAAGTGCAAATAGACCAGGCTTCTTATTTCTTCCCAGATAACGAGGTTGAAATATTTCCTGTTGTGAGAAAAGGAAGAAAGAAAAAAACAGAAACAAAACTATACACTATACATATGTACACATATTCTCCCTCCTCCTCCTCCTCCTCTTCTCCTTTCTTCTGCTCTTA…
chr13	11432922	11432923	246	16	B6xCAST	CATTCCCTGTGCACTATACCTCAGATTATGTTTTCTAAAAGCAGAACTTAAGATGGAAATGTGTGTATAGGGGATTTAGAGGAAGTGTTCTGAAGAGAACCTAGAAAAGAGACAATAACAAAGAACAGGCTGGAGAAAGGCTGAACGAAGACATGTCATCATAACTCTAATCTCAGGACTTGAGAGGTGGCTTAGTGGTTAAATGCACTCACTGCTCCTTTTGTCACTGATGTTATTTATATCTGGCAGCACACAAGTACCTCTAACTCCCAATCCAATGGACCTGACATTCTCTGACCTCTGAGGGCGCACACATGTAGAGAAACAGACAGACAGGCATATATACATGTAAACATAAAACTAAAACATTAAGAAAAAGAAATCTAATTTCAGATACTT…	CATTCCCTGTGCACTATATCTCAGATTATGTTTTCTAAAAGCAGAACTTAAGATGGAAATGTGTGTATAGGGGATTTAGAGGAAGTGTTCTGAAGAGAACCTAGAAAAGAGACAATAACAAAGAACGGGCTGGAGAAAGGCTGAACGAAGACATGTCATCATAACTCTAATCTCAGGACTTGAGAGGTGGCTTAGAGGTTAAAAGCACTCACTGCTCCTTTTGTCACTGATGTTATTTATATCTGGCAGCACACAAGTACCTCTAACTCCCAATCCAATGGACCTGACATTCTCTGACCTCTGAGGGCACACACATGTAGAGAAACAGACAAACAGGCATGTATACATGTAAACATAAAACTAAAACATTAAGAAAAAGAAATCTAATTTCAGATACTT…
chr13	11549345	11549346	612	21	B6xCAST	GATGCTGGTGGAGCTTCTCAGACAAGTGTTGGGCTTTGGTGTCTGCAGATGGGATGGATCCCAAGGAGCAGAGACTGAAGGAAAGTCCATCCAGAGGATGTTTTCATTCTCTCTCTCATTCTCCTCTCCTCCTTAGCCTCTGCAGGCTCCTAGAAATATATCTCCCTTCCTGTTTTGTAGGACCCCAAGAAGGAGCCCCCCCACTCAAGTCACGGGACATGGGGTTACCCAAAGAAACACGAGGGACCTTCTTGTTGCAAAAGCATGAGGTAGCTTTAATGGCAGAGCTCCGGGTCAATACGTATCTCACGCAGGAGACAGAGGAATCGACCCTGAGACTCAAAAATTCGGGGTTTTTATAGGGTAGGGTTTAGGAGCTAGGAAGAATTGGTGCGGTTA…	GGAGCTTCTCAGACAAGTGTTGGGCTTTGGTGTCTGCAGATGGGATGGATCCCAAGGAGCAGAGACTGAAGGAAAGTCCATCCAGAGGATGTTTTCTCTTGTTCATTCTCTCTCTCATTCTCCTCTCCTCCTTAGCCTCTGCAGGCTCCTAGAAATATATCTCCCTTCCTGTTTTGTAGGGCCCCAAGAAGGATCCCCCCCACTCAAGTCACGGGACGCGGGGTTACCCAAAGAAACACGAGAGACCTTCTTGTTGCAAAAGCATGAGGTAGCTTTAATGGCAGAGCTCCGGGTCAATACGTATCTCACGCAGGAGACAGAGGAATCGACCCTGAGACTCAAAAATTCGGGGTTTTTATAGGGTAGGGTTTAGGAGCTAGGAAGAATTGGTGCGGTTAC…
chr13	20208372	20208373	161.5	19.5	B6xCAST	ATACGACAAACTTAAATATGGTGATAATGCTAAGTATAGAAACAAGGACCATAATGATAATGAATAATTATTTAAATTTGATAATAACACTTAGTAATTGGTTACCTTGAGAAAAAGTAAGAGATGCATTGACAGCTAAGAGGAGCAACTGTAAACTTTCCTCAGTTAAACATTTTTATTAGTAGTTTCTCCTTTTTGTTTGTTTAAAATCATGAAGTGAAACTAACTGTATTTCCTTTTCCTTTTTTTTTTTCTTTGCAGAAAAAGCCACTGTCTGCCATTATAAAGGAAGTCTGTGATGGGTAAGTGGAACTTGGAGCTTGGCCGAGGCTTTCTAGTCTGTACATAAAAGGCAAATAAAATATTTGCAGCAGAGTGGTGAGCATTATTCACAGTACT…	ATACGACAAACTTAAATATGGTGATAATGCTAAGTATAGAAACAAGAACCATAATGATAATGAATAATTATTTAAATTTGATAATAACACTTAGTAATTGGTTACCTTGAGAAAAAGTAAGAGACGCATTGACAGCTAAGAGGAGCAACTGTAAACTTTCCTCAGTTAAACATTTTTATTAGTAGTTTCTCCTTTTTGTTTGTTTAAAATAATGAAGTGAAACTAACCATATTTCCTTTTCCTTTTTTTTTTTCTTTGCAGAAAAAACCACTGTCTGCCATTATAAAGGAAGTCTGCGATGGGTAAGTGGAACTTGGAGCTTGGCCGAGGCTTTCTAATCTATACATAAAAGGCAAATAAAATATTTGCAGCAGAGTGGTGAACATTATTCACAGTACT…
chr13	45277427	45277428	330.5	62	B6xCAST	TAGGACATAAGCTGCAACATAAAAACCAGGTATGTGTATGGGGGACATACCTGTAATGCCTGCCATCACTGGCAAAAACAGGAGGGTTTTAAGTTTGAGGCCAACCAGCTTGGGCTACGTAGAAGACTCAATCTCAAAAGATAAATGAATCAGTAAGTAAGTAAATAAATAAAAAGCAGAAGAAACACTATGGCGATAGTACATTTACCTTTGAAACGGGATAAAGAAGTGGGCCTTCAGTCATCTTTAAGTCTTAAAAATATTTCATCTAATAAAATCTTGTCACTCTTCAGTTGTTCCCCAAGTCAGTCTTATCGAGAGAAAATAGAAATGTCCACCCACATTCCTGATGGCCTCATGTTTCCCATAAAATTAAGGCTGGAGAGACTGAGAGTGGAT…	GGACATAAGCTGCAACATAAAAACCAGGTATGTGTATGGGGGACATACCTGTAATGCCTGCCATCACTGGCAAAAACAGGAGGGTTTTAAGTTTGAGGCCAACCAGCTTGGGCTACGTAGAAGACTCAATCTCAAAAGATAAATGAATCAGTAAGTAAGTAAATAAATAAAAAGCAGAAGAAACACTATGGCGATAGTACATTTACCTTTGAAACGGGATAAGGAAGTGGGCCTTCAGTCATCTTTAAGTCTTAAAAATATTTCATCTACTAAAATCTTGTCACTCTTCAGTTGTTCCCTAAGTCAGTCTTATCGAGAGAAAATAGAAATGTCCACCCACATGCCTGATGGCCTCATGTTTCCCATAAAATTAAGGCTGGAGAGACTGAGAGTGGATGT…
chr13	45327247	45327248	228	12.5	B6xCAST	GGTTGCCCAAGACACCACTCACTTTTGGTTACAGAACATGAGGAAATTGCAGCTAACCAGGAAGCTCCCTCCCTGTCGGCTAGCTTTTATAGCGCTGGATTCTGTTGACTAGAAGGTCTAGGCAGATTGTTGGAGGAGAAAAGTCATGAACAGTTTTACCCAGCTATGAACCCTGGCAAAGTATGCCTGTGACTGCGGTCATGGCATGCATGCCAGCCGGGTAGCCATCTGCTTTCTGGTTGGATTTAAGGTCCACTCCCCAGGTGGAAATGCATTTCTGGTGCTGCAAACTTGATCAAGAAGACCATGACTTTGGAGCTCCCTAGGGGTGAACTTACGACTGCTGTTCTGCTACAAAGACATAGCGGCAAAGTGAACTTCAAATTATTATCTCTCTAC…	GGTTGCCCAAGACACCACTCACTTTTGGTTACAGAACATGAGGAAATTGCAGCTAACCAGGAAGCTCCCTCCCTGTCGGCTAGCTTTTATAGCGCTGGATTCTGTTGACTAGAAGGTCTAGGCAGATTGCTGGAGGAGAAAAGTCATGAACAGCTTTACCCAGCTATGAACCCTGGCAAAGTATGCCCGTGACTGCGGTCATGGCATGCATGCCAGCCGGGTAGCCATCTGCTTTCTGGTTGGATTTAAGGTCCACTCCCCAGGTGGAAATGCATTTCTGGTGCTGCAAACTTGATCAAGAAGACCATGACTTTGGAGCTCCCTAGGGGTGAACTTACGACTGCTGTTCTGCTACAAAGACATAGCGGCAAAGAGAACTTCAAATTATTATCTCTCTAC…
chr13	47552468	47552469	167.5	18	B6xCAST	CTAGTTATCTCTTTCTAAAGCTTGTGTCTCTAAGACACAGTCAAGAGTAGATCTCTTTACAATCAACCCATCCCATCAACAGGCAGTTGCAAAAAGAGTTCTTGGAAAAAGAAAATCCTTACAGACCATAATTAAATCGGAGCATCTCAGCTACAGAGATGAACCCATTGGGATGGTTTGGGCCCAGTACCCTGGCCCATAGATACTTTTCTTAGCTGGATCAATACATTATCAAGCAAATGAAACTCCAGAGAGGAGAAGATCGCTTTTACAGAGAAGATTGCTGTGTTGCTGGAGGACACAACTGCTAACCAGAGCAGAGATGTGAGGAAAGCCACGGCTCTACTTCCTTAGGACACCTACGCAGCCACTCAGAAGATCTCTGTTTTAATTTTGTCT…	AACAAGTATGTTACTAGTTATCTCTTTCTAAAGCTTGTGTCTCTAAGACACAGTCAAGAGTAGATCTCTTTACAATCAAACCATCCCATCAACAGGCAGTTGCAAAAAGATTTCTTGGAAAAAGAAAATCCTTACAGACCATAATTAAATCAGAGCATCTCAGCTACAGAGATGAACCCATTGGGATGGTTTGGGCCCAGTACCCTGGCCCATAGATACTTTTCTTAGCTGGATCAATACATTATCAAGCAAATGAAACTCCAGCGAGAAGAAGATCGCTTTTACAGAGAAGATTGCTGTGTTGCTGGAGGACACAACTGCTAACCAGAGCAGAGATGTGAGGAAAGCCACGGCTCTACTTCCTTAGGACACCTACGCAGCCACTCAGAAGATCTCTGT…
chr13	55332524	55332525	149	13.5	B6xCAST	TGCTGCAGTAGAACTGATGCCTGGTACAACCTGCGATGGCTCCAACAGCCCTTGGGTTCAAGGGGCTGGGCAGTGCCCCTCCTCTGCCTCGTAGCACACTGATCCTGCCCTCGCCCACTCCCTGCCTATACCAGATGCACTCAAATGCCACATCCTCCAGCAAAGCCCCAGGACTCTCTCCTCCTTTGCACCTTCTAAAAACACCAATGGTCCTGTGTCTCTTGAGGTCACCTCTTCTACCGGATTGTGGCCCAGTAGCAGAGGCACACAGGACTGAGAAAAGCATCCATCCGTGCTGGGGGGACAGAAGCACCCAGCTCGAGGCTACCTGGGAATGTCACCCCAGCCTGTCAGGATAGCACAGGACAGTGGCACCTCCTGCAGCTTTTAACTGTGTCT…	TGCTGCAGTAGAACTGATGCCTGGTACAACCTGCGATGGCTCCAACAGCCCTTGGGTTCAAGGGGCTGGGCAGTGCCCCTCCTCTGCCTCGTAGCACACTGATCCTGCCCTCGCCCACTCCCTGCCTATACCAGATGCACTCAAATGCCACATCCTCCAGCAAAGCTCCAGGACTCTCTCCTCCTTTGCACCTTCTAAAAACACCAATGTTCCTGTGTCTCTTGAGGTCACCTCTTCTACCGGATTGTGGCCCAGTAGCAGAGGCACACAGGACTGAGAAAAGCATCCATCCGTGCTGGGGGGACAGAAGCACCCAGCTCGAGGCTACCTGGGAATGTCACCCCAGCCTGTCAGGATAGCACAGGACAGTGGCACCTCCTGCAGCTTTTAACTGTGTCT…
chr13	56553252	56553253	131	12	B6xCAST	AAGATGGATAGGCACGCTTTTAATCCCAGCACTTGGGAGGCAGAGGCAGGCAGATTTCTAAGTTTGAGGCCTGCCTGGTCTACAGAGTGAGTTCCAGGACAGCCAGGGCTACACAGAGTAATAATAATAATAATAATAATAATAATAATGACAGAGGACAGCCTCCCTTGCCTCTGTGACACTGAGGCTAGCACTCTTGCTGATAGCCAGCAGGGCGCTTCCCAGGTGCAGCTGGTGCCTGTCCTTGGAAAAAAGAGATTAGGGTCCCATGTTTGAATCATGGAAGAGAGGGTGATCGGGGGTCACAGACAGTTATAGCTAGCCATAAAACTAGTTCCTGGTTGGCCCATAAAGATAGTTCGTAGGTCACAAGAATCCCCCTCTCAGCCATGCGATCCC…	AAGATGGATAGGCACGCTTTTAATCCCAGCACTTGGGAGGCAGAGGCAGGCAGATTTCTAAGTTTGAGGCCTGCCTGGTCTACAGAGTGAGTTCCAGGACAGCCAGGGCTACACAGAGTAATAATAATAATAATAATAATAATAATAATAACAGAGGACAGCCTCCCTTGCCTCTGTGACACTAAGGCTAGCACTCTTGCTGATAGCCAGCAGGGCGCTTCCCAGGTGCAGCTGGTGCCTGTCCTTGGAAAAAAGAGATTAGGGTCCCATGTTTGAATCATGGAAGAGAGGGTGATCGGGGGTCACAGACAGTTATGGCTGGCCATAAAACTAGTTCCTGGTTGGCCCATAAAGATAGTCCGTAGGTCAGAAGAATCCCCCTCTCAGCCATGCGATTCC…
chr13	69517310	69517311	141.5	12.5	B6xCAST	ATGAAATAAAATCTCACAGGATGGTATAGTTCCACAGATGAATTCTTGTCAGTCCCAAGCATTAATGTATTTATAACTAACCTTTAAAGATGCATTCAAAACAATGCCAGTCGGAAAGCTACACTCACGACAGACATTTTTCAATGAACTGCAGTGCAGCACAGTACCCAGCCAAAGGTTCAAGCCCTAGCCAAGACATCCTGAGTCACACAGGCAGCTCACTGCATACCTCATGATAGGTAACACACAGCCTGAGACAGGAAAGACATACAAATCCACAGGAGGTCCTGCTGGCTGTCCACTAGGTCCAGAGGGGAGGAGCTCAAGATGAGAACAGCAGAGTTTAAAGCCTCAGAGCAGCAGGTTTCAAAGACAAAAAGAAAAATTAAATAACTGGCC…	TATAATGAAATAAAATCTCACAGCATGGTATAGTTCCACAGATGAATTCTTGTCAGTCCCAAGCATTAATGTATTTATAACTAACCTTTAAAGATGCATTCAAAACAATGCCAGTCGGAAAGCTACACTCACGACAGACATTTTTCAATGAACTGCAGTGCAGCACAGTAGCCAGCCAAAGGTTCAAGCCCTAGCCAAGACATCCTGAGTCACACAGGCAGCTCACTGCATACCTCATGATAGGTAACACACAGCCTGAGACAGGAAAGACACACAAATCCACAGGAGGTCCTGCTGGCTGTCCACTAGGTCCAGAGGGGAGGAGCTCAAGATGAGAAAAGCAGAGTTTAAAGCCTGAGAGCAGCAGGTTTCAAAGACAAAAAGAAAAATTAAATAACT…
chr13	69785668	69785669	183	19	B6xCAST	TTATGGTAGTTTCCTAAGCTTGTTTTAGAGAGGTGAGAGGTCTCTCTGCTTTTCTCCTACAGCCGCTGTTGCTTTGTTCTTGGGGTCAGTCCAGCAAGAATGGTCACAGAGGAGTTCAAGGCTGGTAAGGTTCAGATGGTGGTTCTTTTATGTGAAAGCACATGTCCTCGTACCCCACAACGACTTCTCAATTGACTGACACATTCCCAAGACCTTCTGGGATGACATTCAGATGAACACTGTATGGATCCCACTCCATATTTAAGACAGAGACACACTCCCAAAACTGACTGGGGACTGAGGTCCAGGCAAGAAGCACAGGCTGCCATCAGCTCCTGAGTGTCTTTGTTCATTCTCATATCATTTTGCTCTTGGCTAACCTTGTCACTATGCTGAGCT…	TTATGGTAGTTTCCTAGGCTTGTTTTAGAGAGGTGAGAGGTCTCTCTGCTTTTCTCCTACAGCCGCTGTTGCTTTGTTCTTGGGGTCGGTCCAGCAAGAATGGTCACAGAGGAGTTCAAGGCCGGTAAGGTTCAGATGGTGGTTCTTTTATGTGAAAGCACATGTCCTCGTATCCCACAATGACTTCTCAATTGACTGACACATTCCCAACACCTTCTGGGATGACATTCAAGTGAACACTGTATGGATCCCACTCCATATTTAAGACAGAGACACACTCCCAAAACTGACTGGGGACTGAGGTCCAGGCAAGAATCACAGGCTGCCATCAGCTCCTGAGTGTCTTTGTTCATTCCCATATCATTTTGCTCTTGGCTAACCTTGTCACTATGCTGAGCT…
chr13	92458092	92458093	110.5	12.5	B6xCAST	TCTGTTGCCATGATAAAACAGCATGGCCAGAAGCAATTCATGGAAAGTCAGTTTTTGTTGGCTTACAGTAGCAGAGGAACAAGAGTCCTTGGTGGGGACACATGGCAGTGAACGGCAGGCATGGTGATAGGAACAGGAAGCTAAGAGATCATATCGTAACCATAAGCGCGAAACAGAAAACAAATGGGCAGAGCTCTATGATCTCAATGCCCATCTCCAGGGACACACGCTGGCAAGGCTGCACCACCCAGACTTCTCCCCAAGCAATACCACCAACTGGAGACCCAGTGTTCAACTACCTGAGCCTGTGAGGGATACTTCTCATTCAAACCACTAGAGTACCTATGACATTTTTATAGAAATAAGTCAACCTAAAGCTTATATGGAACCATAGAAGAC…	TCTGTTGCCATGATAAAAAAGCATGGCCAGAAGCAATTCATGGAAAGTCAGTTTTTGTTGGCTTACAGTAGCAGAGGAACAAGAGTCCATGGTGGGGACACATGGCAGTGAACGGCAGGCATGGTGATAGGAACAGGAAGCTAAGAGATCATATCGTAACCATAAGCGCGAAACAGAAAACAAATGGGCAGAGCTCTATGACCTCAATGCCCACCTCCAGGGACACACGCTAGCAAGGCTGCACCACCCAGACTTCTCCCCAAGCAATACCACCAACTAGAGACCCAGTGTTCAACTACCTGAGCCTGTGAGGGATACTTCTCATTCAAACCACTAGAGTACCTATGACATTTTTATAGAAATAAGTCAACCTAAAGCTTATATGGAACCATAGAAGAC…
chr13	92676332	92676333	721	61	B6xCAST	CACAGCATTTCACTAGACAGTTAATTACTCATTAGCACCGATTTAAACTGATTAATTAGCCAGTGACTTACAGCACTGGGATCAAATCCAAGGCTCATATATGCTAGGCAAGTAGCCTACTGGTTGAGCAACATTCCAGCTTTATAATATGGATCTTAAACCTATTTTATTTGATGCTTCTATCCACATGACCTGAATAATACTTGCCCAGAGTATGTGGGAATGAGTGGCTGACTAAACCCTGTGTGTCACACACATGTGGCGTGTGGTGTGGCATAGGGGATAAAGCGTGTGCGTACAAGCTCTAACTTGACTGAGCTTTCCATATTTCCCCAGAAACCACCATGCATGCAGCTGCACCCTTGAAGAGGACCTTCGCTGACTTGGTGGTTAGCGCAG…	CTGCACAGCATTTCACTAGACAGTTAATTACTCATTAGCACCGATTTAAACTGATTAATTAGCCAGTGACTTACAGCACTGGGATCAAATCCAAGGCCCATGTATGCTAGGCAAGTAGCCTACTGGTTGAGCAACATTCCAGCTTTATAATATGGATCTTAAACCTATTTTATTTGATGCTTCTATCCACATGATCTGAATAATACTTGCCCAGAGTATGTGGGAATGAGTGGCTGACCAAACCCTGTGTGTCACACACATGTGGCGTGTGGTGTGGCATAGGGGATAAAGCGTGTGCGTACAAGCTCTAACTTGACTGAGCTTTCCATATTTCCCCAGAAACCACCATGCATGCAGCTGCATCCTTGAAGAGGACCTTCGCTGACTTGGTTAGCGCAG…
chr13	92677745	92677746	165	12.5	B6xCAST	GGTTTTTTTTAAAGCCTTTTTTATTAGATATTTTCTTCATTTACATTTCAAATGCTATCCCCAAAGCCCCCACCCTGCTCCCCAACCCACCCACTCCCGCTTCCTGGCCCTGGCGTTCCCCTGTACTGAGGCATATGATCTTCGAAATACCAAGGGCCTCTCCTCCTATTAATGGCTGACTAGGCCATCTTCTGCTACATATGCAACTAGAGACACAAGCTCTGGGGGTACTGGTTAGTTCATATTGTTGTTCCTCCTATAGGGTTGCAGACCTCTTTAGCTCCTTGGGTACTTTCTCTAGCTTGCTCACAGTCATCTTTTGGATGTAACACAGGGCCCCTAATGAAGGTGTTGCTGGTTTTAAGTGCTCCTGGGTTCCCCAAAGGCTGCAGGATGCTA…	GGTTTTTTTTAAAGCCTTTTTTATTAGATATTTTCTTCATTTACATTTCAAATGCTATCCCCAAAGCCCCCACCCTGCTCCCCAACCCACCCACTCCCGCTTCCTGGCCCTGGCGTTCTCCTGTACTGAGGCATATGATCTTCGAAATACCAAGGGCCTCTCCTCCTATTGATGGCCGACTAGGCCATCCTCTGCTACATATGCAACTAGAGACACAAGCTCTGGGGGTACTGGTTAGTTCATAATGTTGTTCCTCCTATAGGGTTGCAGACCCCTTTAGCTCCTTGGGTACTTTCTCTAGCTTGCTCACAGTCATCTTTTGGATGTAACACAGGGCCCCTAATGAAGGTGTTGCTGGTTTTAAGTGCTCCTGGGTTCCCCAAAGGCTGCAGGGTGCTA…
chr13	100516883	100516884	86	13	B6xCAST	GCCAGCAGGTGGGTTTCCAGGGAGTGTACTCAGATTCCACCTCAGGGGGCCCGGGTGGGAACCATTCTTGGCTCCCACAGAATTCCTTACAACTGAACACAACAAACACCCTCTCAGCCAAAACGGTTGCCAAGCCAAAGGCCTGTTCTTATTCTAGAGATCTCATCAGAACTTTAAAAGGCTTCCTTTTCTTGAAAGCCTGTTTTACTTTTCTCCTGGATCTACTCCCCCTCCTTTCCCCTCCAACAGGAACTTTACCAGAGCCCTAGTCCTTCTGGCTCCTTACAGCCTGGAATGCCCTTCCCCCTTTCTTTGTCTGCTAATCCCTCACTGAACTCCAAATCTTAGCTCAAGTGCAACCACCTCCTAGAGGCCTTTCACTCAAGTCCCTGCAGGATG…	GCCAGCAGGTGGGTTTCCAGGGAGTGTACTCAGATTCCACCTCAGGGGGCCCGGGTGGGAACCATTCTTGGCTCCCACAGAATTCCTTACAACTGAACACAACAAACACCCTCTCAGCCAAAACGGTTGCCAAGCCAAAGGCCTGTTCTTATTCTAGAGATCTCATCAGAACTTTAAAAGGCTTCCTTTTCTTGAAAGCCTGTTTTACTTTTCTCCTGGATCTACTCCCCCTCCTTTCCCCTCCAACAGGAACTTTACCAGAGCCCTAGTCCTTCTGGCTCCTTACAGCCTGGAATGCCCTTCCCCCTTTCTTTGTCTGCTAATCCCTCACTGAACTCCAAATCTTAGCTCAAGTGCAACCACCTCCTAGAGGCCTTTCACTCAAGTCCCTGCAGGATG…
chr13	102786856	102786857	253	40.5	B6xCAST	CAAGCAGGCAGGATGGGAAAGAGCGGTCTAGAAAGCAGTTCCCTAACTTAGGACAGGAAAAAAAAAATCTCTCTGAACCAACATTTACCTTCATCACAAACAATTGAACAGGGTAAATACTGTCTGCAAATTCAATTTAACAAACTGGGAAGATGATTTGAAACCAGGGAGTCCATGATAGTTTATGAGTCTTTGGGGGTGATATGCAGACTAAGTGTTGTATATAAAAATATCAAACAGAGAATCAGAAAAGGATGGGAGGGGATACCAATATTAGGTTTTATTTATTTATTTATTTATCTATCTATCTATCTATTTATTTATTTATTTATTTAGGAAAAATGGCTCTAGCATGTTTCTGTATTTAACAGAATTATATCTTTCCTCGTGGGGATCAAC…	AGCAAAGATACGATGTCCGCAAGAGCAAACCAAGCGGGCAGGATGGGAAAGAGCGGGCCAGAAAGCAGTTCCCTAGCTTAGGACAGGAAAAAAAAAATCTCTCCGAACCAACATTTACCTTCATCACAAACAATTGAACAGGGTAAATACTGTCTGCAAATTCAATTTAACGAACTGGGAAGATGATTTGAAACCAGGGAGTCCATGATAGTTTATGAGTCTTTGGGGGTGGTACGCAGACTAAGTGTTGTATATAAAAATATCAAACAGAGAATCAGAAAAGGATGGGAGGGGATACCAATATTAGGTTTTATTTATTTATTTATTTATTTATTTATTTAGGAAAAATGGCTCTAGCATGTTTCTGTATTTAACAGAATTATATCTTTCCTCGTGGGG…
chr13	102963629	102963630	272.5	27.5	B6xCAST	TGCCGTGGCTAATATTGAGGTCTTTTTATATAATCTCCTGAATAATAGTTCTCAATAAGGTTTTACAATGCCAGGGGACAGTTTTGGTTTTATGTTTCTGGATACGGAGGAAGATTTCTGTTACTGGCATCTAGTAGGTGGTCAGGATGCTGCTAAGCATCCTACAAAACAGAGATGACACCATTCTCTACAGTAAAGAACTACCCAGCCCCCAAATGCCTTTGTTGTTCTGGAAACCCCAATGAAGTAGAGACAAGGGCATCTCCCAGACACTTGGCATCAATGACCTGTTTTCAGCATCGTGACTCTGTTTCACAGCACTCTGCACAGGTGAAGAGGAGGGTGACCCTCTGATTGTTTTACATCTCATTTCACATTTCCGATTCACAGCAATCTCAC…	GGCCGTGGCTAATACTGAGGTCTTTTTATATAATTTCCTGAATAATAGTTCTCAATAAGGTTTTACAATGCCAGGGGACAGTTTTGGTTTTATGTTTCTGGATACGGAGGAAGATTTCTGTTACTGGCATCTAGTAGGTGGTCAGGATGCTGCTAAGCATCCTACAAAACAGAGATGACACCATTCTCTACAGTAAAGAACTACCCAGCCCCCAAACGCCTTTGTTGTTCTGGAAACCCCAATGAAGTAGAGACAAGGGCATCTCCCAGACACTTGGCATCAATGGCCTGCTTTCAGCATCGTGACTCTGTTTCACAGCACTCTGCACAGGTGAAGAGGAGGGTGACCCTCTGATTGTTTTACATCTCATTTCACATTTCCGACTCACAGCAATCTCAC…
chr13	104506365	104506366	443	66	B6xCAST	AGGCTCTGAGGGCTTAGCCAATAAGTTTCCCCTTCCCAGACATTCCTCCCTGCAAAAGGTATTTCATCTCAGGCCCACCCTGAAAAGTAGGGTATGGTTTTACAAATCTATTTTCCACCATGACAATAAACTGTTTAGAACCATGAGCTGTCTCTTTTCTTCAAGATCTACTATGGGGAGCCATGAAGAAGGCCTTTGCCTACAGAGCCACAGCCTAATCTCCCATAGAAGGCTACTCTGAGCCTACATCAGCCAAGATAAGGGATAATTTGAGATGGGAAAAACCGGCGCTCCCCCACCCCACCCCCAACTCTGTTCTCTGCTTTTCTGTAACTCCCAGCCGTGACTGGATGTCCAAGGGTCTGAGAATCCTACAGCCCTGACCTCGTCACAGGGCTG…	AGGCCCCGAGGGCTTAGCCAATAAGTTTCCCCTTCCCAGACATTCCTCCCTGCAAAAGGTATTTCATCTCAGGCCCACCCTGAAAAGTAGGGTATGGTTTTACAAATCTATTTTCCGCCATGACAATAAACTGTTTAGAACCATGAGCTGTCTCTTTTCATCAAGATCTACTGTGGGGAGCCATGAAGAAGGCCTTTGCCTACAGAGCCACAGCCTAATCTCCCATAGAAGGCTACTCTGAGCCTACATCAGCCAAGATAAGGGATAATTTGAGATGGGAAAAACCGGCGCTCCCCCACCCCACCCCCAACTCTGTTCTCTGCTCTTCTGTAACTCCCAGCGGTGACTGGATGTCCAAGGGTCTGAGAATCCTACAGCCCTGACCTCGTCACAGGGCTG…
chr13	104622547	104622548	257.5	35	B6xCAST	GAGAGAGTACAAAAATTTTGAACAGAGCTTAGTCTCTCTGAAAGGCTTTTCCTTTCACTATTTTTTGTTGTTTTGGGTTTTTTTTTGGTTCTGGGGCTTGAACCTGGGCCATTGCACACGGGAGGCAACTCTCTAGCATCGAGTGGTATTTCAAACTATGAAAAAAATTGTTTTGCTTTTCTTTTTTTTTTTTTTTTCCCTTCATTTAACAAGCAGCACGTGTTGGGAGAAAACTCTCAGTGTGTGTCTAAAGGGCACCCAACTGGTTGTGTGGGCTGATAGGCTTGGAGCTGAAAATGCTGGAGATGGCACATATGCAAAACCACAAATTCCATAAATACTCAGGATGCTCTTTAGTAAGCCAGGGCACCCATCCTGTGTGTTAGTTTTCCCGCACTA…	TGGAGAGAGAGTACAAAAAATTTTGAACAGAGCTTAGTCTCTCTGAAAGGCTTTTCTTTTCACTATTTTTGTTGTTTTGGGTTTTTTTTTGGTTCTGGGGCTTGAACCTGGGCCATTGCACACGGGAGGCAACTCTCTAGCATCGAGTGGTATTTCAAACTATGAAAAAAATTGTTTTGCTTTTCTTTTTTTTTTTTTTTTCCCTTCATTTAACAAGCACGTGTTGGGAGAAAACTCTCAGTGTGTGTCTAAAGGGCACCCAACTGGTTGTGTGGGCTGATAGGCTTGGAGCTGAAAATGCTGGAGATGGCACATATGCAAAACCACAAGTTCCATAAATACTCAGGATGCTCTTTAGTAACCAGGGCACCCATCCCGTGTGTTAGTTTTCCCGCACTA…
chr13	110960338	110960339	466	85.5	B6xCAST	ACACACTCACACACACACACATACACACGCACACATACACACACAAACACACACACATACACACACACACAAACATACACACAAACACACACACAAACACACACACAAACACACACACAAACACACACACACACAAACACACACACATACACACACACACACACACACACACACACACACACACACACACACACACACACACACACCTAAAGCACGGGCATCTATCAAGAGTGAGCCATATTCCTGGCCATGGAAAATTTATTAGGAGGTCAGAAAGAATAGACAGTGTACAGAGTATGTTTTCTTATAAGGGCAACTGAATTGAATTTTAAAACGAATAGCAGGAATATTGGGAAATGTTTGAGTAGCTGGAAAGTAGAGAACATACTTTTAATAATC…	ACACTCACACACACACACATACACACGCACACATACACACACAAACACACACACATACACACACACACAAACATACACACAAACACACACACAAACACACACACAAACACACACACAAACACACACACACACAAACACACACACATACACACACACACACACACACACACACACACACACACACACACACACACACACACACACCTAAAGCACGGGCATCTATCAAGAGTGAGCCATATTCCTGGCCATGGAAAATTTATTAGGAGGTCAGAAAGAGAATAGACAGTGTACAGAGTATGTTTTCTTATAAGGGCAACTGAATTGAATTTTAAAACGAATAGCAGGAATATTGGGAAATGTTTGAGTAGCTGGAAAGTAGAGAACATACTTTTAATAATC…
chr13	112447325	112447326	294	23	B6xCAST	GAAGGAAGGAAGGAAGGAAGGAAGGAAGGAAAGAAAGAAAGAGAGAGAGAGAGAGAGAAAGAAAGAAGGAAAGAAGAAAAGGAAAGGAAAGGAAAGGAAAGGAAAGAAAAGAAAAGAAAAGAAAAGAAAAGAAAAGAAAAGAAAAGAAAAGAAAAGAAAAGAGAAAAGAAATAGATTCCTTACTGGTCTGGAGCCTGTGAGCTGAACATCCAGGAGTTGGAAGTTTGGTTTCCGATGAGGCTCCCTTTGTGGTTTACAGATAGCCACACTTTCTTGGTGTGTCCTGGCATGGGCTGTTCTTAGAGATTTCCCTGTTTTTCTTCCTCACCTTATAGAGCCACCAATCACTTCACTCCTCTATGACTTTCGGTGCCATCAGGATCTTCCCAAAGCCCTGTC…	AAGGAAGGAAGGAAGGAAGGAAGGAAGGAAGGAAGGAAGGAAAGAAAGAAAGAGAGAGAGAGAGAGAGAAAGAAAGAAGGAAAGAAGAAAAGGAAAGGAAAGGAAAGGAAAGGAAAGAAAAGAAAAGAAAAGAAAAGAAAAGAAAAGAAAAGAAAAGAAAAGAAAAGAAAAGAAAATAGATTCCTTACTGGTCTGGAGCCTGTGAGCTGAACATCCAGGAGTTGGAAGTTCGGCTTCCAATGAGGCTTCCTTTGTGGTTTACAGATAGCCACACTTTCTTGGTGTGTCCTGGCATGGGCTGTTCTTAGAGATTTCCCTGTTTTTCTTCCTCACCTTATAGAGCCACCAATCACTCCTCTATGACTTTGGGTGCCATCAGGACCTTCCCAAAGCCCTGTC…
chr13	117467621	117467622	334	53.5	B6xCAST	ACACACAAGCTAGTGTGCTACAAAAGAAGATGCAAGGCCATGATGCTTTCATCTCAGCCTGGTGCTTTTTCCACGTTGCCCTGCTGTGCCTTGAACTACTTCTTTTTATTGACGTGATTGACCGCACTGTGTAAACAGCTACACTTTACCTCCACCTCATCCGTTTCCCCGATATTTCCACGGCCTCCAGGTCTTGAGAGTTTGGTAAACGATTTATGCTAATTAGCATCTATTTTACAGGTGGAATAAAAAAAAAAACATTAACAGCACATTTTTTTTGTTTGTTTTTTTTTGTTTTTTTTTTCTCAACCGTGTAACACAGAGTCCCTTTTAGTGTGAGGCTATGGTCTGATGAGTAATTGCAGCACACCTGCCAGCATTATGAAAACACTCCTGTGA…	TGAGACACACACAAGCTAGTGTGCTACAAAAGAAGATGCAAGGCCATGATGCTTTCATCTCAGCCTGGTGCTTTTTCCATGTTGCCCTGCTGTGCCTTGAACTACTTCTTTTTATTGACGTGATTGACCGCACTGTGTAAACAGCTACACTTTACCTCCACCTCATCCGTTTCCCCGATATTTCCACGGCCTCCAGGTCTTGAGAGTTTGGTAAACGATTTATGCTAATTAGCATCTATTTTACAGGTGGAATAAAAAAACATTAACAGCACAATTTGTTTGTTTGTTTTTTTTTGTTTTTTTTTTCTCAACCGTGTAACAGAGTCCCTTTTAGTGTGAGGCTATGGTCTGATGAGTAATTGCAGCACACCTGCCAGCATTATGAAAACACTCCTGTGA…
chr14	31684880	31684881	201.5	24	B6xCAST	TACTGCAGGCAAGACAGGGCTCAGAGCCCTGCAGCCCTGCCCTCAGCTGCTGCAGCTCTCAGTAACTCAGCAAGATGCAATGCTGGTGATTGGTGCAATGCAGGATTTGAGACTGGTCTATATGTGGGGCCTGTGATTGGTAGAACTGGAAACTGTACTGAGGTTGGTGCAAATACAGTCTACACCAGCGGGGGGGGGGGGGGGTAAGGCTCAAAAACCTTAATTTGTACACACACTCTCATCTTGAGTCAGCCTTGAGGAGCCTTCTCTGCCCTGTAGTGCTCCATTAGGCCAGGCTTTCACCCTCGGCTTCTGAGAACATGCTGAGGATACTAAAGCAGAGACATTCTGGGAAGAAGGGCACTCTGGGCCCAAGGGCTTCTGTGTACTTTGTCAGAT…	TACTGCAGGCAAGACAGGGCTCAGAGCCCTGCAGCCCTGCCCTCAGCTGCTGCAGCTCTCAGTAACTCAGCAAGATGCAATGCTGGTGATTGGTGCAATGCAGGATTTGAGACTGGTCTATATGTGGGGCCTGTGATTGGTAGAACTGGAAACTGTACTGAGGTTGGTGCAAATACAGTCTACACCAGCGGGGGGGGGGGGGGGTAAGGCTCAAAAACCTTAATTTGTACACACACTCTCATCTCGAGTCAGCCTTGAGGAGCCTTCTCTGCCCTGTAGTGCTCCATTAGGCCAGGCTTTTACCCTCTGCTTCTGAGAACACGCTGAGGATACTAAAGCAGAGACATTCTGGGAAGAAGGGCACTCTGGGCCCAAGGGCTTTTGTGTACTTTGTCAGAC…
chr14	32492756	32492757	116.5	7	B6xCAST	TTCTTTCTTTCTTTCTTTCTTTCTTTCTTTCTTTCTTTCTTTCTTTCTTTTCCTTCCTTCCTTCCTTCCTTCCTTCCTTCCTTCCTTCCTTCCTTCCTTCCTTCCTTTCTTTCTTTCTTTCTTTCTTTCTTTCTTTCTTTCTTTCTTTCTTTCTTAGACTGGGAGTCTTCTGTGTATTTCCAAAACTATGTCAAGTTTGTAGTCTTCCTGTCTCAGTCTCGTGAGTGCAGAGATTACATGTGTGTAACACCATTATTTAGACTCTGCACTTGCTCATAGAAACACAGTCCCTCAGAGCTTCTTGAAATCCAGGAGGGCTGCTGAGGAGACATGGACCCCCTCCCCCCGAGGCTTGCTTTAGTATCCACCCCTACTCTTCCCGCTGCAGTGAAGAGCACC…	TTTCTTTCTTTCTTTCTTTCTTTCTTTCTTTCTTTCTTTCTTTCTTTCTTTTCCTTCCTTCCTTCCTTCCTTCCTTCCTTCCTTCCTTCCTTCCTTCCTTCCTTCCTTTCTTTCTTTCTTTCTTTCTTTCTTTCTTTCTTTCTTTCTTTCTTTCTTAGACTGGGAGTCTTCTGTGTATTTCCAAAACTATGTCAAGTTTGTAGTCTTCCTGTCTCAGTCTCGTGAGTGCAGAGATTACATGTGTGTAACACCATTATTTAGACTCTGCACTTGCTCATAGAAACACAGTCCCTCAGAGCTTCTTGAAATCCAGGAGGGCTGCTGAGGAGACATGGACCCCCCCCCCCCGAGGCTTGCTTTAGTACCCACCCCTACTCTTCCCGTTGCAGTGAAGAGCAC…
chr14	32506548	32506549	482	29.5	B6xCAST	CAGGGTTGACAGTAGGGTTTTCACATTCTGATTTATTTTTCTGGAGGCCTCCACAGGTTTTTGAGAGCTCTTTGCACCCCAATCTTGTGTGACAATCTTTTTCATGATGACCACATGCAAGAGGAAGTGTAGACTCCAATTTTGTGTTTTTAGCAGAACACAGAATTGAGCATCTGGAAGCTGCCACCGACTCAAACAGTTCTCTGCATAGTAGTTTTCCTCTTGAGAGGTTCCCAGTGCCATATTAAGGAGCTGTAGAAGAACAGCAGCACTCTGGGCACCTGTCCTGACCTCTCCCACTCTGGTTTCCAGGCTTGACATTGGTAGCCACGGGCACTTCGAGCATGCTGGTCCTGAGTCTTGAACTATTCTCAGTCCACGTGTAGAACACATGCCAAG…	CAGGGTTGACAGTAGGGTTTTCACATTCTGATTTATTTTTCTGGAGGCCTCCACAGGTTTTTGAGAGCTCTTTGCACCCCCATCCTGTGTGACAATCTTTTTCATGATGACCACATGCAAGAGGAAGTGTAGACTCCAATTTTGTGTTTTTAGCAGAACACAGAATTGAGCATCTGGAAGCTGCCACCGACTCAAACAGTTCTCTGCATAGTAGTTTTCCTCTTGAGAGGTTCCCAGTGCCATATTAAGGAGCTGTAGAAGAACAGCAGCGCTCTGGGCACCTGTCCTGACCTCTCCCACTCTGGTTTCCAGGCTTGACATTGGTAGCCACGGGCACTTCGAGCATGCTGGTCCTGAGTCTTGAACTATTCTCAGTCCACGTGTAGAACACATGCCAAG…
chr14	32509669	32509670	197.5	18.5	B6xCAST	CCCTGATATGGTACCTTGTTGGGAGCTCCTCAGAGCCTAGCTGCCAACATAGGAACGCTACCAGCCTCTCAACTTTTCTGTTAGGAGTTTCTCAGCTTGGCCTTAGACTTTTAGGTCATTAACCCTCCAGACCAGGAAAACAAGGACTGGGACGTGGGGGCTGTAATGATTGGTCAGAGAATGGGTCCTGAGCCACATCTCTGACCCTGGGAGAAGACGTGGCATCCTGAGCTGCTGGCAAAGTCATTAGTAAATAAACATTTACCTCGTTTTTAGAAGATTGTTCCTGAAAGAGTTAAATCAAAAGGGCATGCTAGGTGCAGGACAGCTATGTGCTCTAGAGACTTGAGAAATAGTCTAAAGCGTGTCTGAGATGTAGCCAGGCCCAGTGGGCCCTTT…	TGATATGGTACCTTGTTGGGAGCTCCTCAGAGCCTAGCTGCCAACATAGGAACGCTACCAGCCTCTCAACTCTTCTGTTAGGAGTTTCTCAGCTTGGCCTTAGACTTTTAGGTCATTAACCCTCCAGACCAGGAAAACAAGGACTGGGACGTGGGGGCTGTAATGATTGGTCAGAGAATGGGTCCTGAGCCACATCTCTGACCCTGGGAGAAGACGTGGCATCCTGAGCTGCTGGCAAAGTCATTATTAGTAAATAAACATTTACCTCGTTTTTAGAAGATTGTTCCTGAAAGAGTTAAATCAAAAGGGCATGCTAGGTGCAGGACAGCTATGTGCTCTAGAGACTTGAGAAATAGTCTAAAGCGCGTCTGAGATGTAGCCAGGCCCAGTGGGCCCTTT…
chr14	34793579	34793580	185.5	21	B6xCAST	GAGGAGGATATCAGAAGAGAAAAGGTCTTCCATGGACCAGTAAGATCTATTATATACTATTATTATATATCTATTATCTATCTATTATCTATTATGTATTATATTATTATATATAATATATATCTATTATATCTAAATATATCTATTATATATCTATCTTATCTAATGTATATATACAATATATAATATATCTATGATATATATCTAATATATGTATATATGATATATAAGTAAAAATGGCCATCTTACCAAATCAACACAATCCCCATCAAAATTCCAACACATTTTTCCCTTTTCTTGAATTTCACATCACACACCCTAATTACATTCATCTCCTGTCTCTCTGTATCTTCTTTCTGCCCTTGCAACTTCCCCCCAACAGAAAACATCAAACAAAGA…	AGGAGGATATCAGAAGAGAAAAGGTCTTCCATGGACCAGTAAGATCTATTATATACTATTATTATATATCTATTATCTATCTATTATCTATTATGTATTATATTATTATATATAATATATATCTATTATATCTAAATATATCTATTATATATCTATCTTATCTAATGTATATATACAATATATAATATATCTATGATATATATCTAATATATGTATATATGATATATAAGTAAAAATGGCCATCTTACCAAATCAACACAATCCCCATCAAAATTCCAACACATTTTCTCCCTTTTCTTGAATTTCACATCACACACCCTAATTACATTCATCTCCTATCCCTCTGTATCTTCTCTCTGCCCTTGCAACTTCCCCCCAACAGAAAATATCAAACAAAGA…
chr14	48189530	48189531	263	43	B6xCAST	TGTATAGTTTCTGTTGGTAAAGGAAATGCCATTTCTGTATGTATGTGTGTTTGTGTGTTGTGTGGTGTGTATGTACATATGTGTGTATGTATAGTTACTGATTCCTTTTTTACTCCTGTTTTTCTCAAATAAGCAAAGTTTTTCTTTACATTATGAATTTACTATGTTACAGATAATACATTAAACAAAATGTATTTCATTTAATGATCTGGGTCTACAAATTATGGTATTTGTATTCCTAATATGTATACTTTTGCTAACATATTTTACTTATATTCAAAGAAGTAGATTTTTTTTACTTCACTCTTTGTTTTAAATATCTTTTCTTAAATTTTACTAATTTCTGCTCATATCGCTTCCTGACATAATTCTCTAAGCAAACAGAATATTATTAAAGTT…	GTATAGTTTCTGTTGGTAAAGGAAATGCCATTTCTGTATGTATGTGTGTTTGTGTGTTGTGTGGTGTGTATGTACATATGTGTGTATGTATAGTTACTGATTCCTTTTTTACTCCTGTTTTTCTCAAATAAGCAAAGTTTTTCTTTACATTATGAATTTACTATGTTACAGATAATACATTAAACAAAATGTATTTCATTTAATGATCTGGGTCTACAAATTATGGTATTTGTATTCCTAATATGTATACTTTTGCTAACATATTTTACTTATATTCAAAGAAGTAGATTTTTTTTTACTTCACTCTTTGTTTTAAATATCTTTTCTTAAATTTTACTAATTTCTGCTCATATCGCTTCCTAACATAATTCTCTAAGCAAACAGAATATTATTAAAGTT…
chr14	50933109	50933110	152.5	9	B6xCAST	AGTGATCCACAACTGATCTAAATACCTCCATTGCTGAAATGAAAATTATCTTTTATTAGTGTCTCTCTCCACCGATGGAAGGGAAGTGCATCATTTTACTCAATTGATGTATACTGACCTGTCAGATATATACACATGTGTTTATTGATTCAGCTAGTGACTCAAATCCAAAGATAGTTTTGTCATATTTGGTAGATGAACGTCTTTAGACTTTGCTTAATTTTTGTCTTCAGCAAAGAAATTGTAAATGGAGGCTTTTTTGTTTTGGTTTGATTTTTTTTTTTTTTAAATAGGGTCTCATCCTTGAACTAGGCTGGTCTTAAATTCTTGGCAAGTCCCACCTCTCCTCAAAGGCCTGAGACACCATGCCTGATTCTAGGTTCTGATAGTTTTAGACAC…	CTACAGTGATCCACAACTGATCTAAATACCTCCATTGCTGAAAAGAAAATTATCTTTTATTAGTGTCTCTCTCCACCGATGGAAGGGAAGTGCATCATTTTACTCAATTGATGTATACTGACCTGTCAGATATATACACATGTGTTTATTGATTCAGCTAGTGACTCAAATCCAAAGATAGTTTTGTCATATTTGGTAGATGAACGTCTTTAGACTTTGCTTAATTTTTGTCTTCAGCAAAGAAATTGTAAATGGAGGCTTTTTTGTTTTGGTTTGATTTTTTTTTTTTAAATAGGGTCTCATCCTTGAACTAGGCTGGTCTTAAATTCTTGGCAAGTCCCACCTCTCCTCAAAGGCCTGAGACACCATGCCTGACTCTAGGTTCTGATAGTTTTAGAC…
chr14	60667648	60667649	101	11	B6xCAST	AATATGTGTGGTCGGTTTTCTGAAGAAAATGTCAGATAGATTTGATTTCTCAGGTAGGGAATTGGATTGGGTAAAGAGCCAATGTGAATGAAAAGGAAGAGATGATTGACGTGAAGGGCAAGCTTCCTGCCAAGGGGGTGGGGGTGAGGGTGGGGGGCGGAGGGAGCAGGGGGGCAGAGGGGGAAGGGGCAGGAGGAGCGACCCTGGCGTGCTGGAAAATCACGATTTTATTTATTGCCCGCTTTAAGACTTAAGGCTTAACCTTTCTAGTCTCTAAAAAGCATCCACAACTGGTTTTTAACAATTGTGTGATTCATGGAAAAATAAAGAGGATAGTGACAAACATTTTTGCCACCGTATGGTCTCAATTGAAATACTGTAAAGACAGAACGTGCAAGC…	AATATGTGTGGTCGGTTTTCTGACGAAAATGTCAGATAGATTTGATTTCTCAGGTAGGGAATTGGATTGGGTAAAGAGCCAATGTGAATGAAAAGGAAGAGATGATTGACGTGAAGGGCAAGCTTCCTGCCAAGGGGGTGGGGGTGAGGGTGGGGGGCGGAGGGAGCAGGGGGGCAGAGGGGGAAGGGGGCAGGAGGAGCGACCCTGGCGTGCTGGAAAATCACGATTTTATTTATTGCCCGCTTTAAGACTTAAGGCTTAACCTTTCTAGTCTCTAAAAAGCATCCACAACTGGTTTTTAACAATTGTGTGATTCATGGAAAAATAAAGAGGATAGTGACAAACATTTTGCCACCGTATGGTCTCAATTGAAATACTGTAAAGACAGAACGTGCAAGC…
chr14	62291244	62291245	303	8	B6xCAST	CATGCCCTCCCCCAGGGGATGGACTAAAATCTCTTTGCAACTGCTAGTCAAAAATATATCTGTCACTGGGGAAATAGTTCTGTCGGGGAGTGCTTTGCCTGGCATGACTGGGGCCCTAGACTCTCTCCCCAGTGCCATGAGAGAGTAAAAGACATGAAAGCTAGACCAAAATCAACTTCTCCTCTGCTTCTGTGAGGCTTTGGGTCTTAGTGATCCCAAAGCAACCAATACACACATATATTTCTAACATGTTTCTAATATTACCCAGTACTTGAAATTTTATCAGATACATATTCTTTTCCTATCTTAAAATCAATGAAATTAGTATGTAACTCACAACCAATAATGTCATACATTGGCAGATTTTAAATAGTTTCAAGGGAGGGAAAAAAGAAGAGA…	ACCATGCCCTCCCCCAGGGGATGGACTAAAATCTCTTTGCAACTGCTAGTCAAAAATATATCTGTCACTGGGGAAATAATTCTGTCGGGGAGTGCTTTGCCTGGCATGACTGGGGCCCTAGACTCTCTCCCCAGTGCCATGAGAGTAAAAGACATGAAAGCTAGACCAAAATCAACTTCTCCTCTGCTTCTGTGAGGATTTGGGTCTTAGTGATCCCAAGGCAACCAATACACACATATATTTCTAACATGTTTCTAATATTACCCGGTACTTGAAATTTTATCAGATACATATTCTTTTCCTATCTTAAAATCAATGAAATTAGTATGTAACTCACAACCAATAATGTCATACATTGGCAGATTTTAAATAGTTTCGTGGGAGGGAAAAAGAAGAGAG…
chr14	62872209	62872210	145	22	B6xCAST	TCCTTCAACTATGGAAGTGCCTCGCATATATTCTCATCAGAGAGAGACAATTTTGTCCTTTACTGGGTCACATCCATACACGGATATTCACACACTCTGACTTATAAATATGTTTTATACTAAAAAGTTCCCTCCTTTATACAAGTTATTTTGCCCACTGTTAACAGGCCTGTTTCTACCAGAGGCAACTGGGAAGGAACTGCCCTTGACCTTTTTTGGAAGGGTAGAAACCAGCTAGTACTTGTGCCTGTGCTAAGGAAGGCTTTTTAAACATGGAAAGCAAAATCTGAAAGGATTCAAGAGACTTTGTGGAGTGAATTTGTGTTGTGTAGACAGGAAGAAGAGAAGGGTAGGGAGGTGGGCCTCATTCTAGATCTTCTTTTCATTTGCAGAGAATGT…	CCTTCAACTATGGAAGTGCCTCGCATATATTCTCATCAGAGAGAGACAATTTTGTCCTTTACTGGGTCACATCCATACATGGATATTCACACACTCTGATTTATAAATATGTTTTATACTAAAAAGTTCCCTCCTTTATACAAGTTATTTTGCCCGCTGTTAACAGGCCTGTTTCTACCAGAGGCAACTGGGAAGGAACTGCCCTTGACCTTTTTTGGAAGGGTAGAAACCAGCTAGTACTTGTGCCTTGTGCTAAGGAAGGCTTTTTAAACATGGAAAGCAAAATCTGAAAGGATTCAAAAGACTTTGTGGAGTGAATTTGTGTTGTGTAGACAGGAAGAAGAGAAGGGTAGGGAGGTGGGCCTCATTCTAGATCTTCTTTTCATTTGCAGAGAATGT…
chr14	63014935	63014936	363.5	7.5	B6xCAST	TTATATTTAAGTACACTGTAGCTGTCTTCAGACACACCAGAAAAGGGAGTCAGATCTCCTTACGGATGGTTGTGAGCCACCATGTGGTTGCTGGGATTTGAACTCCAGACCTTCAGAAGAGCAGTCAGGTGCTCATACCCACTGAGCCATCTCACCAGCCCCGCTTTCTATTTTTATTGAGAGATAATTTACTCTTTTCCAGTTTGCCCTTAAGTAGTTTCAGTATGTTTGTAAGTTATGCAGCCATCGGAGCCACTCTCCCTTCCTGACATTCTTCCTTCTCCCTCTTCTGGTGCCCTAGAGGTCTCTCCCACTCTGGACCTTGAATTTAGACACAGCAATACAACCCACGGCCCTCCCGTCTGGCTTCTTCCACTCGGAACAATGTTTCCAAGTTTG…	ATTTAAGTACACTGTAGCTGTCTTCAGACACACCAGAAAAGGGAGTCAGATCTCCTTACGGATGGTTGTGAGCCACCATGTGGTTGCTGGGATTTGAACTCCAGACCTTCAGAAGAGCAGTCAGGTGCTCATACCCACTGAGCCATCTCACCAGCCCCGCTTTCTATTTTTATTGAGAGATAATTTACTCTTTTCCAGTTTGCTCTTAAGTAGTTTCAGTATGTTTGTAAGTTATGCAGCCATTGGAGCCACTCTCCATTCCCGACTGACATTCTTCCTTCTCCCTCTCCTGATGCCCTAGAGGTCTCTCCCACTCTGGACCTTGAATTTAGACACAGCAATACAACCTGTGGCCCTCCCGTCTGGCTTCTTCCACTCGGAACAATGTTTCCAAGTTTG…
chr14	66802128	66802129	182	22.5	B6xCAST	GGGTTGAGTAGACTGTGGACTTGAAAGTTACAAGGTGCACAGGCCCTTCTTTGTGTGGAGGGCGTCTGGGGAATGATGGGATGAATGCGAGGTCGTCATTGTTCTCACGTGGGTTCCTCGTGGTTGAAGAAGAGTTGATGCTCCCCCTTCCCACATGCCTGACCACAAAGCCACCCCCCACACTCTACTTTATGGCTCCTAGAAGAAGCCAGGCCTTTCCTTCTGGAAGCAGACTCTCTTTTATTTCACCCTTAACCAGGCTCAATGTTGTAACTAGCCATCATAGGTCATGCCGAGTGTGTGAAGGATCCAAGCAGCTATCTCTTGGTCTAAGCCACTTGGGGCCTCCTGCTTTCCTGTCTTCTTGCCTTAAGGATGACGTCATCTTTTTCTTTTCTT…	GTTGAGTAGACTGTGGACTTGAAAGTTACAAGGTGCACAGGCCCTTTGTGTGGATGGCGTCTGGGGGATGATGGGATGAATGCGAGGTCGTCATTGTTCTCACGCGGGTTCCTCATGGTTGAAGAAGAGTTGATGCTCCCCCTTCCCACATGCTTGACCACAAAGCCACCCCCCACACTCTACTTTATGGCTCCCAGAAGAAGCCAGGCCTTTCCTTCTGGAAGCAGACTCTCTTTTATTTCACCCTTAACCAGGCTCAATGTTGTAACTAGCCATCGTAGGTCATGCCGAGTGTGTGAAGGATCCAAGCAGCTATCTCTTGGTCTAAGACACTTGGGGCCTCCTGCTTTCCTGTCTTCTTGCCTTAAGGATGACGTCATCTTTTTCTTTTCTTTTCTT…
chr14	72934490	72934491	177	26	B6xCAST	GCAGTATACAATATATAGTACACAGGGGACAAGCAAAAGGAACACACTCTATACCTCAGATGTGCTTGCCTTGAGAGGGGTTCAAAGCTAATACACAAACGGTAGCTCTACAAGCCACAGAACAAAAAATCCTGGGTGGAGCTTCTGGTTTCTGTGTACCTTTAGTCTCATCTTCACATTTACTCTTGCTCCTTAGCTGGGCTCCTCTAAATCTCCCTTGGTCATTTGGGACCATTTCCATCCAGTGCAAAACAGAGCATCTCTATCAAGTCTCAAAAACAGCAGCACTTGGCATTTTAAAACATTTTACAAAACACCCCAACATGCACATGATCTCACTCCATCCTTTTAAGAGCCCTAGAAATAGTATAAAAGTAAAGCCAAACAAGGGGGGATGGG…	GCAGTATACAATATAAAGTACACAGGGGACAAGCAAAAGGAAGACACTTTATACCTCAGATGTGCTTGCCTTGAGAGGGGTTCAAAGCTAATACACAAACGGTAGCTCTACAAGCCACAGAACAAAAAATCCTGGGTGGAGCTTCTGGTTTCTGTGTACCTTTAGTCTCATCTTCACATTTACTCTTGCTCCTTAGCTGGGCTCCTCCAAATCTCCCTTGGTCATTTGGGACCATTTCCATCCAGTGCAAAACAGAGCATCTCTATCAAGTCTCAAAAACAGCAGCACTTGGCATTTTAAAACATTTTACAAATCACCCCAACATGCACATGATCTCACTCCATCCTTTTAAGAGCCCTGGAAATAGTATAAAAGTAAAGCCAAACAAGGGGGGATGGG…
chr14	73879047	73879048	143	17	B6xCAST	TGGCTTCTTCTACATAGCCTCTTCAGCTGAGTTTTATGCTATTTGCATAACTTCACTTATTGATTCCATTTGTCTTTGGCTAAAGCTTTGAATACTTGCATAGTTCTTTAATTTATTCTCTTGTCAAAACACACCATTAAAACTCTGTCACTGAGGCTGGAGATATGGCTCAGGAGTATAGTGACACCCTTGTAACAAGTGTGAATCCCTAAGTTCAAACCCCATGCAATACAATGAAAATTTATCCCTACCACTTAAAGTACTCATAGACATGATTTTAATATTTTATTCATAAGACCCTAGAGAAACTGATGAGTTTGGGCATATTTTTGACCACTAGAAATATATTATTCATTAATCTGAAACAAAACAAAACAATGCTCTGAATGACTTTTTTGT…	TGGCTTCTTCTACATAGCCTCTTCAGCTGAGCTTTATGCTATTTGCATAACTTCACTTATTGATTCCATTTGTCTTTGGCTAAAGCTTTGAATACTTGCATAGTTCTTTAATTTATTCTCTTGTCAAAACGCACCATTAAAACTCTGTCACTGAGGCTGGAGATATGGCTCAGGAGTATAGTGACACCCTTGTAACATGTGTGAATCCCTAAGTTCAAACCCCATGCAATACAATGAAAATTTATCCCTACCACTTAAAGTACTCATAGACATGATTTTAATATTTTATTCATAAGACCCTAGAGAAACTGATGAGTTTGGGCATATTTTTGACCACTAGAAATATATTATTCATTAATCTGAAACAAAACAAAACAATGCTCTGAATGACTTTTTTGT…
chr14	74849218	74849219	724	104	B6xCAST	CTATAGAGCCTTCCTATGGGATTTCTGGAGAGCTAAGTATAAAAGTTTGGTGACTTCCAAGGAATAAAGAAGAGAAACTTCCTTTAGACAACGATAAAGGATTCCTGGCTAGTGCTATGGATTCTATCTAAGATCACTGTAACCAAACACTCAATGGTCACCACAGGGAAGTTAAGCTATTTTCCAGGGTACATTCTGGCTAAAGGACACAGTGGCCTCATGGAAGACATCATCTACAAGTGGAGAGTGCTCCTAAGTAGTTGCCTGAACTCCCTGTAGGGCTCTCATTCAACTTACTAACTAAAAGCAAGTGAACTCTCAAAGCACACAGGTCATTCTGTGGTTCTGCTTCGCCACCTGCAGCCAACGGGACCCTCACACTCCTTACAATACTTGATC…	TATAGAGCCTTCCTATGGGATTTCTGGAGAGCTAAGTATAAAAGTTTGGTGACTTCCAAGGAATAAAGAAGAGAAACTTCCTTTAGACAACGATAAAGCATTCCGGGCTAGTGCTATGGATTCTATCTAAGATCACTGTAACCAAACACTCAATGGTCACCACAGGGAAGTTAAGCTATTTTCCAGGGTACATTCTGGCTAAAGGACACAGTGACCTCATGGAAGACATCATCTACAAAGTGGAGAGTGCTCCTAAGTAGTTGCCTGAATTCCCTGTAGGGCTCTCATTCAACTTACTAACTAAAAGCAAGTGAACTCTCAAAGCACACAGGTCATTCTGTGGTTCTGCTTCGCCACCTGCAGCCAACGGGTCCCTCACACTCCTTACAATACTTGATC…
chr14	76468170	76468171	201	15	B6xCAST	ATGTTAAGATTAAAAATCCGCCCCTAAGTACCTCCAGGACGGGGCATGTTTTAATCGTTCTGTGACTAGCCCCATAGAATCTAGCATGGTGTCTTAAACGTAGTTGGCACTTCCTGAAGTACCTTTTGAATCAAATTGAAGTTTATAAAAAAGCCGAGTTATCCAATAACAGCCAAAGTCTTTTAACCATATATTAACTTACTTAGTCTTCACAATAGCCCAGAGATGAGTACTGAAATGTGCGAAGGGTGTTTTGAAATGCGGTCCTTTAAGCCAGCACAAGGCAGTTTCATCAGTCAAAGTGAGGTCACTGAAAAAACTTTCTGGGATCGTTTAACAAAGAGCATGTGGTTTCCTTGTTTAATTATATGGTTTGGATAAAACAAGCCTAATGTCGTT…	ATGTTAAGATTAAAAATCCGCCCCTAAGTACCTCCAGGACGGGGCATGTTTTAATCGTTCTGTGACTAGCCCCATAGAATCTAGCATGGTGTCTTAAACGTAGTTGGCACTTCCCGAAGTACCTTTTGAATCAAATTGAAGTTTATAAAAAAGCCGAGTTATCCAATAACAGCCAAAGTCTTTTAACCATATATTAACTTACTTAGTCTTCACAATAGCCCAGAGATGAGTACTGAAATGTGCGAAGGGTGTTTTGAAATGCGGTCCTTTAAGCCAGCACAAGGCAGTTTCATCAGTCAAAGTGAGGTCACTGAAAAAACTTTCTGGGATCATTTAACAAAGAGCATGTGGTTTCCTTGTTTAATTATATGTTTTGGATAAAACAAGCCTAATGTCGTT…
chr14	82065477	82065478	901.5	9	B6xCAST	AAAAACAAAACAAAAAATAATTAAAAAAAAAACAAACACACGTACAAAATCTCAAAATTGGCAATAATATATAAGCAAAAAGCCAGTAGGAAAAATAAGAAACAGAGAGAGAGAGAGAGAGAGAGAGAGAGAGAGAGTCCAAACAGACAAAAAGTTGAAAAAACACCTTTGATTTCATTTTCTGTTTTCATCTACTGCTGTGTGTGTGGCTCACACTTAAGTGTGGTTAATATATCCACTGAGATTCCATTGTGACAAACTGTATTTCCCTTTGCATGCAGGTGTCCATTGAGATAGCTTCTGAGTGAGAGATAGGGCCAATGTCTATTTCCTGCTCTCTGCACTTGGCCTTCCATTGGGTTGAATCTCTTCATACCCGCCACATGCTGCCACAGTCTC…	AAAACAAAACAAAAAATAATTTAAAAAAAAAACAAACACACATACAAAATCTCAAAATTGGCAATAATATATAAGCAAAAAGCCAGTAGGAAAAATAAGAAACAGAGAGAGAGAGAGAGAGAGAGAGAGAGAGAGAGTCCAAACAGACAAAAAGTTGAAAAAAACACCTTGACTTCATTTTCTGTTTTCATCTACTGCTGTGTGTGTGGCTCACACTTAAGTGTGGTTAATATATCCACTGAGATTCCATTGTGACAAACTGTATTTCCCTTTGCATGCAGGTGTCCATTGAGATAGCTTCTGAGTGAGAGATAAGACCAATGTCTATTTCCTGCTCTCTGCACTTGGCCTTTCATTGGGTTGAATCTCTTCAGACCCGCCACATGCTGCCACAGTGTC…
chr14	93062489	93062490	148.5	21	B6xCAST	AGGTGTGTGTAGGGGTTTCTCTGTGTAAGAAATTCTCTCTGCCCTCCAGCTAAGTTGCTTCAGTGGAAATGAGATCCTGACCACTGGGCTGATGGATGCACACATAACTGACTTGTTCAATTCTAATTTAATTCTGGAAATCTATCTCCTTTATGACTTTAATTTTTCTGACATGAAAACATTCTATCTTTTTAGCTTCCGTTGCTTTTGCAGAACAGAAGTATTCCTCGGTGGAGGGTTAAAAAAAAAGTTGCAAAGATGCAGCAATAAACAATATCACAAAACCAATTTTCATATTGGCAGAAAAACAACTCCAAATAACCGTAACTTGAAACACTGGCAGATTCTTGGCAGCTTATGTTGTGAGATCATTAATGAGAACTTTCACCACAAACATGC…	AGGTGTGTGTAGGGGTTTCTCTGTGTAAGAAATTCTCTCTGCCCTCCAGCTAAGTTGCTTCAGTGGAAATGAGATCCTGACCACTGGGCTGATGGATGCACACATAACTGACTTGTTCAATTCTAATTTAATTCTGGAAATCTATCTCCTTTATGACTTTAATTTTTCTGACATGAAAACATTCTATCTTTTTAGCTTCCATTGCTTCTGCAGAACAGAAGTATTCCTCGGTGGAGGGTTAAAAAAAAAGTTGCAAAGATGCAGCAATAAACAATATCACAAAACCAATTTTCATATTGGCAGAAAAACAACTCCAAATAACCGTAACTTGAAACACTGGCAGATTCTTGGCAGCTTATGTTGTGAGATCATTAATGAGAACTTTCACCACTAACATGC…
chr14	103437818	103437819	110.5	19.5	B6xCAST	TCCAGTTTTTGTATCAAATTAAAAAAAAAACAGGCTTATGAAACACTTAGGAAGTCGAGGCAGGAGAATCAAGAGTTCAAGGACAACTTCCACTATATGAGAGCCTGTTTCAAAAAAAAAAAGAACAATATATAGGATTATGAGTAAGATAGGTTTTCAAGCAAAGAAACAGTCATTTAAAGAATTTAAACAAACCATTTATTACCCAAATTACTGTATTTTCTAAATAGTAAGATACTATAGATTATAAAAATAAAATAAAACAATTTAAAGAATAAACCCACAGAACATTATTTACCTCACAATACTTTTCTATGGAGAAGGGGAAACTCAACTGTTTAGATTCGAGGTAATTCCAAGGCTGACCCAGTCAGCTGATAAACACTGAGGTCGGGAGGG…	AATTTAAAAAAAAAAACAGGCTTATGAAACACTTAGGAAGTCGAGGCAGGAGAATCAAGAGTTCAAGGACAACTTCCACTATATGAGAGCCTGTTTCAAAAAAATAAAAAAATTAAAAAAAAGAACAATATATAGGATTATGAGTAAGATAGGTTTTCAAGCAAAGAAACAGTCATTTAAAGAATTTAAACAAACCATTTATTACCCAAATTACTGTATTTTCTAAATAGTAAGATACTATAGATTATAAAAATAAAACAAAACAATTTAAAGAATAAACCCACAGAGCATTATTTACCTCACAATACTTTTCTATGGAGAAGGGGAAACTCAACTGTTTAGATTCGAGGTAATTCCAAGGCTGACCCAGTCAGCTGATAAACACTGAGGTCGGGAGGG…
chr14	104006655	104006656	128.5	21.5	B6xCAST	AGAAAACAGAAGCTACATATAAAATTAATAAACCAATACACACATATTAGTATATTTATTAAAATATAACAATGTATAAAATTTTTCTCTACTAACATGGAAAATTCTACACAATGGTGAGATCAATTATCAATTCTTGTAGAATTACAGGTGTGAAGTACAAATTTCTTGTTTCTTTGGAAATTCAGTTGTGTCATATGATGGTTTTCTGGATGCTGTCTTGTGAGAGAAGGCTTTGCTGAAACAGGCACTTGAGAGGGTGTGTGATGTTTGGAAAGAGAATCCCACAGACAGTGAAAGGACACCCTTGCGTTGCTATGCCTTGCAATGCTTTGCTGGTTTTCACTAGGTGTGCAAAGCTTTGCTGGTCTTTGCTGATCTTTACTTCATAGAGAAAAA…	AGAAAACAGAAGCTACATATAAAATTAATAAACCAATACACACATATTAGTATATTTATTAAAATATAACAATGTATAAAATTTTTCTCTACTAACATGGAAAATTCTACACAATGGTGAGATCAATTATCAATTCTTATAGAATTACAGGTGTGAAGTACAAATTTCTTGTTTCTTTGGAAATTCAGTTGTGACATATGATGGTTTTCTGGATGCTGTCTTGTGAGAGAAGCCTTTGCTGAAACAGACACTTGAGAGTGTGTGTGATATTTGGAAAGAGAATCCCACAGACAGTGAAAGGACACCCTTGCTTTGCTATGCCTTGCAACACTTTGCTGGTTTTCACTAGGTGTGCAAAGCTTTGCTGGTCTTTGCTGATCTTTACTTCATAGAGAAAAA…
chr14	108371395	108371396	146	9	B6xCAST	AAAGTTAATAAATATATGCTTTGCACCTAAGAGGTGCCAATCATACAGAAACCAGAGACTTAACATTTAAATTGCATAGTTCTATTGAAGGGCTGAAAACTTTGTTGCTAATGCAGTCAGTATTTAATAAAAGAAATTGAGAAAGAAAGGCAGTGGGTAGAAAGTAAATCATATAGAGACCAGTTTCAATATTCTTGTGTTTCATTTTTTTTCATGCAGAATTTTCTTTTATACAGAGAGATTGTGAGCTACCCACTTTAGTGTAGCATGGTGTAGGTGAGTAGATTTGTTTCCTACCTTATATTTAGATTAAATGGATGAAAATAACACAAAGCTAAATACATTTAAATTAGAGCAAGAGTTGTTTTGACTGATAAATTTTCTTAGGGATCCAAAGTC…	AAGTTAATAAATATATGCTTTGCACCTAAGAGGTGCCAATCATACAGAAACCAGAGACTTAACATTTAAATTGCATAGTTCTATTGAAGGGCTGAAAACTTTGTTGCTAATGCAGTCAGTATTTAATAAAAGAAATTGAGAAAGAAAGGCAGTGGGTAGAAAGTAAATCATATAGAGACCAGTTTCAATATTCTTGTGTTTCATTTTTTTTTCATGCAGAATTTTCTTTTATACAGAGAGATTGTGAGCTACCCACTTTAATGTAGTATGGTGTAGGTGAGTAGATTTGTTTCCTACCTTATATTTAGATTAAATGGATGAAAATAACACAAAGCTAAATACATTTAAATTAGAGCAAGAGTTGTTTTGACTGATAAATTTTCTTAGGGATCCAAAGTC…
chr14	121822690	121822691	820.5	117	B6xCAST	GGTGGGGGGAAAAAGTAACCCTGTCCCTTTCCTCTGGCTTCTTCTTATGGAATCTCCTTTCCTTTTCTTGCTCTTTTTCTCTGTCTGCCGATTCTTTTTTCCCCCTTTGCTATGGGTGCCTGCTGTAACAAGAACACACAATTTTTAATTTCCCAGTAACCTATAAACATGCAATTAAAACGAAATTGAAAATGTTCAGAAGACATGTAGTTCTTCCGCCTGTCCCGTCTGGCTGAGATTGCTTCCTGCCTATGTCTCTCTGAGTGGGAGGTTGTGGGGGATGGAAGGGTGGGGGATGGGGGAAGGGAGAGGGCAGGGGGTAAAAAGAAGGGGTAAAATGGGGGTGGGGTGGAGGTGAGAGTTGAGAGGATGGGGAGGTAGATAGAGGAGGGAAACTGC…	GGGTGGGGGAAAAAGTAACCCTGTCCCTTTCCTCTGGCTTCTTCTTGTGGAATCTCCTTTCCTTTTCTTGCTCTTTTTCTCTGTCTGCTGATTCTTTTTTCCCCCTTTGCTATGGGTGCCTGCTGTAACAAGAACACACAATTTTTAATTTCCCAGTAACCTATAAACATGCAATTAAAACGAAATTGAAAATGTTCAGAAGACATGTAGTTCTTCCGCCTGTCCCGTCTGGCTGAGATTGCTTCCTGCCTATGTCTCTCTGAGTGGGAGGTTGTGGGGGATGGAAGGGTGGGGGATGGGGGAAGGGAGAGGGCAGGGGGTAAAAAGAAGGGGTAAAATGGGGGTGGGGTGGAGGTGAGAGTTGAGAGGATGGGGGGATAGATAGAGGGGGGAAACTGC…
chr15	27884548	27884549	116.5	11.5	B6xCAST	ATGTGCACGTACCCAGCGCTTTATTAAGATAAGAGCAGATGGTTATGGAATCCTGCTGAAGTTCCCAAGCCTCCCACAAGGCTACTGTCTCTTTAGAAAGCCTGGGTAAAATTTCCTTCTTGGCAAGGAGACTGTGGATTAATATATTTGTGAAAGTCACAGCATCTTAAAGACATGTGCACAAACCCTTCATTTAAATATAAGAAGATTAGCAAGTCACTGGATTTTTATCACCCTAGTCCAGCCGCCATCTCTGATCACACTTGTAGCCAATGGTTGTCAATTCTGTGTCATAAAAAAAATAAAATAAAAATCCCAGCCCCATAAATAGGGCAGGATGGGTCTGCCCTCCCCCTTAAGCTGAAGAACAAGTCAAAAGTTAATCTTTTTCCTCCCTAC…	GTGCATGTACCCAGCACTTTATTAAGATAAGAGCAGATGGTTATGGAATCCTGCTGAAGTTCCCAAGCCTCCCACAAGGCTACTGTCTCTTTAGAAAGCCTGGGTAAAATTTCCTTCTTGGCAAGGAGACTGTGGATTAATATATTTGTGAAAGTCACAACATCTTAAAGACATGTGCACAAACCCTTCATTTAAATATAAGAAGATTAGCAAGTCACTGGATTTTTATCACCCTAGTCCAGCCGCCATCTCTGATCACACTTGTAGCCAATGGTTGTCAATTCTGTGTCATAAAAAAAAATAAAATAAAAATCCCAGCCCCATAAATAGGGCAGGATGGGTCTGCCCTCCCCCTTAAGCTGAAGAACAAGTCAAAAGTTAATCTTTTTCCTCCGCTAC…
chr15	31670394	31670395	72	12.5	B6xCAST	TTGTGTGAAGAACCTGTGGTGTCAAATCAGCTGGGGCTGAAGAATCAGCTGTGATTAACAAGTAACCAGAACTACTAAACTGAAGCCATTGCTTTGCTGGGATACTCAGTGCTGGTTGGCTGGAGCTAAGAATTTAGTGGTGGTGGTTAAGAAGAGACTGGTACTGTTGATGTGAAATCTTCTGGGAAGTGTTTCCTGAGAGTTAGCACACAAAAAGCTATGTTTCAGTGGCGACCAAGGTTATACCTAACACTGTCAACCAAACTTGGTAGTATGGGAGTCACCTAGGTGGTGCTGGTTTTTAAGGCATCAAGTCATCAATGGAGAATAGCTGAGACTTGAAGCTAGGAGAGCCATTAGTGAAGGTGCAGCCTCAGTAGACATTGAGGCTTGGTACCA…	TTTGTGTGAAGAACCTGTGGTGTCAAATCAGCTGGGGCTGAAGAATCAGCTGTGATTAACAAGTAACTAGAACTACTAAATTGAAGCCATTGCTTTGCTGGGATACTCAGTGCTGGTTGGCTGGAGCTAAGAATTTAGTGGTGGTGGTTAAGAAGAGACTGGTACTGTTGATGTGAAATCTTCTGGGAAGTGTTTCCTGAGAGTTAGCACACAAAAAGCTATGTTTCAGTGGTGACCAAGGTTATACCTAACACTGTCAGCCAAACTTGGTAGTATGGGAGTCACCTAGGTGGTGCTGGTTTTTAAGGCATCAAGTCATCATGGAGAATAGCTGAGGCTTGAAGCTAGGAGAGCCATTAGTGAAGGTGCAGCCTCAGTAGACGTTGAGGCTTGGTACCA…
chr15	32347498	32347499	102.5	18	B6xCAST	ATGTTTATCCTTTTAAAAGAAATAAACCCAGCAGCGTCTATAATGCTAGGTTTCTCATAATCACGATCTCCAAGCTCTCCTGTGCTGCTCTCTCCAGCCTTGCTAAGGATGCTTGTACTGGTTGTACAGGACATTGATGGACCTTCCTAGCATTTATAAGCAAAGGCTGCAGTGATTTTCAATATATACTAACTGGATCTCTCTCTCTCTCTTTGTTGAAGGGCTGGTGTGTGACAACTGGGCCTGGGTACCCATGAGGCTGTGCAGTTCAGTGTGATTCATGACCGAGGCTACACGTCTTTGCCCTCTCTCTCCTCGGTAAGTGAGACGTCTGAGTGGGAAGTGCTGAGACCCAGAAAGAGTACTACACATTTAGACTAGATGTCTCTTCTGTTAAAA…	ATGTTTATCCTTTTAAAAGAAATAAACCCAGCAGCGTCTATAATGCTAGGTTTCTCATAATCACGATCTCCAAGCTCTCCTGTGCTGCTCTCTCCAGCCTTGCTAAGGATGCTTGTACTGGTTGTACAGGACATTGATGGACCTTCCTAGCATTTATAAGCAAAGGCTGCAGTGATTTTCAATATATACTAACTGGATCTCTCTCTCTCTTTGTTGAAGGGCTGGTGTGTGACAACTGGGCCTGGGTACCCATGAGGCTGTGCAGTTCAGTGTGATTCATGACCGAGGCTACACGTCTTTGCCCTCTCTCTCCTCGGTAAGTGAGACGTCTGAGTGGGAAGTGCTGAGACCCAGAAAGAGTACTACACATTTAGACTAGATGTCTCTTCTGTTAAAAAT…
chr15	54353957	54353958	249	26.5	B6xCAST	CCTCTCTTTCCTAAGCAGCTATCTTCAAATTCAGGCCCAGTCTACAACTATTCCTCAAGTGATCATTTATGATGTATTTCTATTGACTGAAATTTGTTTTTGATAAGGTTTTGTTACATTTACTGGAAACAGTCCTGTCTGTTTATCTTTACACTACAATACTATGGTGGTAGCTCCTCTCACACTGCCTATAAACAGCCTACTTTGTTGAAACATGAAGGTGTAACCTTGCTATTTCCATGCTCAGTATCCTCCAATGAAATCTACTGAAGAAAGAATACAAACCAAAAGAATTGTTCATCACATCTGTACAGCCTTGGAATCAGATCCATATCTAAGTACACAACATTATTTTTATTCAATTCCTTTCCATACCACACTAGATCAAATATTTATTCT…	CCTCTCTTTCCTAAGCAGCTATCTTCAAATTCAGGCCCAGTCTACAACTATTCCTCAAGTGATCATTTATGATGTATTTCTATTGACTGAAATTTGTTTTTGATAAGGTTTTGTTACATTTACTGGAAACAGTCCTGTCTGTTTATCTTTACACTACAATACTATGGTGGTAGCTCCTCTCACACTGCCTATAAACAGCCTACTTTGTTGAAACATGAAGGTGTAACCTTGCTATTTCCATGCTCAGTATCCTCCAATGAAATCTACTGAAGAAAGAATACAAACCAAAAGAATTGTTCATCACATCTGTACAGCCTTGGAATCAGATCCATATCTAAGTACACAACATTATTTTTATTCAATTCCTTTCCATACCACACTAGATCAAATATTTATTCT…
chr15	54455357	54455358	147.5	28	B6xCAST	CATGACTTTATGTGAATTTTTATTGCAAAGACTGCTATTTTCTTCAGAAATTTTCTAGTTTTATTTTTTTACCTCACATTATTATACAAACTTAAGGGGTATGATATGATATTTTGATACATGTGCACATCACATATCTATCCCCTCAAATACTTACTGTTTCTTTTGCAGTGAAATGGTCAAGATCTCCTCTAGCTATTTGGAAGTAGAGAACACATTACTATCGTCAATAACTGCCCTGCTGTGCAACAGAACACCAGGGCTTGCTGCTGCTAAGTCTAAGTTTATTCCCCTGTACCAATCATTTCCAACTTCTCCTGATCCAACCCTTTGCAGTATCTGCTAACTATTGTCCTACTTTCTACATCTACAAGGCTGACATTTTTCCACTTCCATATA…	TATTCATGACTTTATGTGAATTTTTATTACAAAGACTGCTATTTTCTTCAGAAATTTTCTAGTTTTATTTTTTACCTCACATTATTATACATACTTAAGGGGTATGATATGATATTTTGATACATGTGCACATCACATATCCATCCCCTCAAATACTGTTTCTTTTGCAGTGAAATGGTCAAGATCTCCTCTAGCTATTTGGAAGTAGAGAACACATTACTATAGTCAATAACTGCCCTTGCTGTGCAACAGAACACCAGGGCTTGCTGCTGCTAAGTCTAAGTTTATTCCCCTGTACCAATCATTTCCAACTTCTCCTGATCCAACCCTTTCCAGTATCTGCTAACTATTGTCCTACTTTCTACATCTACAAGGCTGACTTTTATCCACTTTCATATA…
chr15	58257030	58257031	629.5	27.5	B6xCAST	CCCCTGGAGGTTGCTGGCTAGCTAGTCTTGCCAAATTGGTGAGCTCTAGATTTAGTGAGAGATCTGTCTCAACCAATAAGGTGAAGAGAAGAGAGGAAAATACCTGAATGTTATGATGTTAACCCCTGAATTCTACACATGTGCAAATACACATGTCTGCACCAGAACCTGCACATGTGCGTATACACACCACACACACACACACACACACACACACACACACACACACACACACACACAAACGGGGTAGGGGAAGGGAGCAGGAGAGACTACTTTTCCCCAAATTCCTCTTTCAATATTTAACTACCTCCTTATGTCACCCCTGGCCTCCCTACTCCCATGGCAGCTTCTCAAGGGATGGAGACAAATCATCTTTGGGCTTCTCCCCTGCTCAGAAAG…	CCCCTGGAGGTTGCTGGCTAGCTAGTCTTGCCAAATTGGTGAGCTCTAGATTTAGTGAGAGACCTGTCTCAACCAATAAGGTGAGGAGAAGAGAGGAAAATACCTGAATGTTATGATGTTAACTCCTGAACTCTACACATGTGCAAATATACATGTCTGCACCAGAACCTGCACATGTGTGCATACACACCACACACACACACACACACACACACACACACACACACACACACACACACAAACGGGATAGGGGAAGGGAGCAGGAGAGACTACTTTTCCCCAAATTCCTCTTTCAATATTTAACTACCTCCTTATGTCACCCCTGGCCTCCCTACTCCCGTGGCAGCTTCTCAAGGGATGGAGACAAATCATCTTTGGGCTTCCCCCCTGCTCAGAAAG…
chr15	58259399	58259400	756.5	88	B6xCAST	AAGCCATCACTCAACTCCTTAGTTACACCTCACTTAAAGGACTAGCTTAGACAGACTCTTTTGGTCCCAGCTCCTAGGTGATTGGTTCACATGGGTTCAGCTGTTTCATGCTGGTTTAAATAATACTTCTGGATACAAGATAAGGGTATGGATCCCAGGAGCCCTTTCAGGCAGGTGGCACACCCAAGGGGTTGTAGTCAACATGGCAGACACAAAGATAGAACTACAGCCCGTTTTTTGTTTTATTTTTTTAAATTACTCTGAAAAGTAGAAATTAAGCTTTGAGTGGTGGTAGGGAACCAGGGGAAAGAGAGCATGTGAGTGCAAGGGGCCCATCCTATCAATGAGTGGGCTGCTAGCTTGTCTCCCTTCATCAGAACTTTAGACTCTTAGTCCCAC…	AGCCATCACTCAACTCCTTAGTTACACCTCACTTAAAGGACTAGCTTAGACAGACTCTTTTGGTCCCAGCTCCTAGGTGATTGGTTCACATGGGTTCAGCTGTTTCATGCTGGTTTAAATAATACTTCTGGATACAAGATAAGGGTATGGATCCCAGAAGCCCTTTCAGGCAGATGGCACACCCAAGGGGTTGTAGTCAACTTGGCAGACACAAAGATAGAACTACAGCCTGTTTTTTGTTTTATTTTTTTAAAATTACTCTGAAAAGTAGAAATTAAGCTTTGAGTGGTGGTAGGAAACCAGGGGAAAGAGAGCATGTGAGTGCAAGGGGCCCATCCTATCAATGAGTGGGCTGCTAGCTTGTCTCCCTTCATCAGAACTTTAGACTCTTAGTCCCAT…
chr15	58382751	58382752	391	26.5	B6xCAST	TGCCCCTCAAGGCTGTGCCTCCTCACCCTGATTAGTTCCTATCCTATGGAACTGTAATCCAAAATAACTACTTCCTCCTGTAAGTTGCTTTGGACATGTATTCTATCATAGCAACAGGGAAAGTAGCCAATATAGTAGCAAATTAAAGGATTTATTAAAAAATTCTGGAGCATTTGCTGTATTGCAGACACTGTATTGGGGATTATACTATGAAACAAAATAAAATGCAATCGTCTACTCAGAGAACCATCAATAGAGCATGAGGAAAGCATCCAACAGAGATGAGTTTAGATCAGTGGTCCTTAACCTTCCTAATGCTGTGACCCTTTAGTGCAGCCTTTCACATTGTGGTGACTCCCCCCTCCATAAAGTTATTTTCATAGCTGCTTTGTAAGTATA…	TGCTATGCCTGCCCCTCGAGGCTGTGCCTCCTCACCCTGATTAGTTCCTATCCTATGGAACTGTAATCCAAAATAACTACTTCCTCCTGTAAGTTGCTTTGGACATGTATTCTATCATAGCAACAGGGAAAGTAGCCAATATAGTAGCAAATTAAAGGATTTATTAAAAAATTCTGGAGCATTTGCTGTATTGCAGGCACTGTATTGGGGATTATACTATGAAACAAAATAAAATGCAATCGTCTACTCAGAGAACCATCAATAGAGCATGAGGAAAGCAGCCAACAGAGATGAGTTTAGATCAGTGGTCCTTAACCTTCCTAATGCTGTGACCCTTTAGTGCAGCCCTTCACATTGTGGTGACTCCCTCCTCCATAAAGTTATTTTCATAGCTGCTTT…
chr15	61241951	61241952	955.5	169	B6xCAST	GGAGGTGTGCAGAGAGGCAGCCTTGCCCAAGTTGGCGTGTGAGCATAAAATGAACAGAGATGAGAATAAACACATAATGCATGTGTATGTAGACATGCTTTACATTCAGTTCTTATGAGAGCCAATGAATTGTAGCATGGATAGTGAAACTGAGGCTCCAAGAGTTTAAACCATGTGCTGTATGAAGCAGGATATAGTCTTTCTGCAACCAGTCACACACATGTTCCAATTTTTACCTTATAAAGTACATTTCTCCCATTAACAGTGTGGGAAATGGCAGTCCAAGTGGAGGTATAGAGACCCAGTTTCTTCTATTGTCCTTATGGTACCAATGTCTTCTGTTGCCTCAGAGATCTGAAATAGGTCTTTGTCTAAGGAAGACACTGATAGAAAAAAATA…	GCAACCTATGGAGGTGTGCAGAGAGGCAGCCTTGCCCAAGTTGGCGTGTGAGCATAAAATGAACAGAGATGAGAATAAACACAGAATGCATGTGTATGTAGACATTCAGTTCTTATGAGAGCCAATGAATTGTAGCATGGATAGTGAAACTGAGGCTCCAAGAGTTTAAACCATGTGCTGTATGAAGCAGGATATACTCTTTCTGCAACCAGCCACACACACGTTCCAATTTTTACCTTATAAAGTACATCTCTCCCATTAACAGTGTGGGAAATGGCAGTCCAAGTGGAGGTATAGAGACCCAGTTTCTTCTATTGTCCTTATGGTACCAATGTCTTCTGTTGCCTCAGAGATCTGAAATAGGTCTTTGTCTAAGGAAGACACTGATAGAAAAAAATA…
chr15	68006018	68006019	266	13	B6xCAST	TTGTAGAAATGTATTTTAGTGTGTGTGTGTGTGAGTGTGTGTGTACCATATGATATCAAATTGTCAAGTGAACCCAGAAGAGAAGGTAACATTGAAGATGGGTCTAGAAGAAGAAAAAAGAAATTCTAAGAAAAGAATACGTACTGGAAACCATAGATCAGCCATTCAAACTCTTATCTTCTGACACTTTCTAGAGGACTCTAGAATACTAAAAATCCACATTGCACCGGCTCCCTCGAAGCTAAGGTCTGAACACAAATTAGGTTGCACTCATTATAAACATCCCAGTAAGTATAAAATGTAGAGACAGTAAAGAAACTTCTTTGCCCTTCTGGAAGCTTTGAGGATAAGATGTTCTGGATACATCTTGGGCTTTGTTCTCCAGTTTCTCATTATCTA…	TTTAGTGTGTATGTGTGTGTGAGTGTGTGTGTGTGTGTGTGTGTACCATATGATATCAAATTGTCAAGTGAACCCAGAAGAGAAGGTAACATTGAAGATGGGTCCAGAAGAAGAAAAAAGAAATTCTGAGAAAAGAGTACGTACTGGAAACCATAGATCAGCCATTTAAACTCTTATCTTCTGACACTTTCTAGAGGACTCTAGAATACTAAAAATCCACATTGCATCGGCTCCCTCGCAGCTAAGGTCTGAACACAAATTAGGTTGCACTCATCATAAACATCCCAGTAAGTAGAAAATGTGGAGACAGTAAAGCAACTTCTTTGCCCTTCTGAAAGCTTTGAGGATAAGATGTTCTGGATACATCTTGGGCTTTGCTCTCCAGTTTCTCATTATCTA…
chr15	68007628	68007629	149	13.5	B6xCAST	CTTGAAACCAGAAGAATAAAACAGGAAGCAGTTCTTGAGAATCATCATGTCTTGGTACCCAGACAGTGGTCAGCCTAGTCTTAGAATTCTGCCAGCCAAGTCTTACAAAATACAGTCAAAAGTTTAACTTTAACTTATACCAACTTTACAATTTTATGGGCCTTCTGGCCAATTTGGAAATTTTGTGACTGCTTCTATAAAACTCTCTTTAGAGAACAGGTTCTTATAATTTCTCCAAAATCTATATATTTGCCTTATTTTGCTCTCTGACCTCTCCTTGTCATCACACACCAAGGAGGCCTTGCTCTGGCAAGTCACTCCATAAAATTTAATGTGTAATATAAAATTCTCTCTCCATTAATATTTACCCATCTATCTCCATTCTCATCATAGGCCCCT…	CTTGAAACCAGAAGAATAAAACAGGAAGCAGTTCTTGAGAATCATCATGTCTTGGTACCCAGACAGTGGTCAGCCTAGTCTTAGAATTCTGCCAGCCAAGTCTTACAAAATACAGTCAAAAGTTTAACTTTAACTTATACCAACTTTACAATTTTATGGGCCTTCTGGCCAATTTGGAAATTTTGTGACTGCTTCTATAAAACTCTCTTTAGAGAAAAGGTTCTTATAATTTCTCCAAAATCTATATATTTGCCTTATTTTGCTCTCTGACCTCTCCTTGTCATCACACACCAAGGAGGCCTTGCTCTGGCAAGTCACTCCATAAAATTTAATGTGTAATATAAAATTCTCTCTCCATTAATATTTACCCATCTATCTCCATTCTCATCATAGGCCCCT…
chr15	77733694	77733695	168.5	23.5	B6xCAST	AAGACCGTAAAGCTCCCATTGAGGAAGAAAGACTTCTCTTGGAATCTGGTCCAAAGAGAGCGATTTGGGGCTCTGTAATCTACATAGAGCCTTGCACTGTGACTATAATACAAAAACAATATCCAGCCTTACTGTACTCAACATACTCTGATATCAATTCAATTTCCTCTCTGAATGTTCTTCTTGAGCAAAAAAAAAAAAAAAAAAAAAAAAAAAACCCACAGGTCAGAACTAGATAGGCTGCAAGTCACACATGAGGGTGTGGGCACCACAGTGTCTGATGTGCCGGATGTCTGTGGTGGATGCAAACCCCAGCACCACAGTGTCTGATCACAGTTCTGATCACAGTTCTGATCACAGTGTCTGAGAAGCCGGATGTCTGCGGTAGATGTAAACCAG…	TTATTTGTGAGAATCTAAAGACCGTAAAGCTCCCATTGAGGAAGAAAGACTTCTCTTGGAATCTGGTCCAAAGAGAGCGATTTGGGGCTCTGTAATCTACATAGAGCCTTGCACTGTGACTATAATACAAAAACAATATCCAGCCTTACTGTACTCAACATACTCTGATATCAATTCAATTTCCTCTCTGAATGTTCTTCTTGAGCAAAAAAAAAAAAACCACAGGTCAGAACTAGATAGGCTGCAAGTCACACATGAGGGTGTGGGCACCACAGTGTCTGATGTGCCGGATGTCTGTGGTGGATGCAAACCCCAGCACCACAGTGTCTGATCACAGTTCTGATCACAGTTCTGATCACAGTGTCTGAGAAGCCGGATGTCTGCGGTGGATGTAAACCA…
chr15	80762834	80762835	121.5	14.5	B6xCAST	GCCTTCATTCATATACATGTACACCATGTGTGTGCCTGTTGCCATGGATCTCCTGGAACTGCAGTCACAGACAGTTGTACGCTGCGTGTGGGTGCTAGGAATGGAACTCTAGTGGAACATCCAGTGCTTCTAACCGCTGAACCATTTCTCCAGCTCCTGTTTCTGTTTCTTGAGACAGGGTCTCCTTAAGTCGTCCTGGCTGCCCTGGAACTTGCTCTATAGACCAGGTTGGTCTCAAACTCAGACTGCCTGCTTCTGCCTCCCGAGTGCCGGGATTAAAGACGTGCACTCCCACTGCCAACCAGCTCAAACACATTCTTTTTTTTAAGACTAGAGAAGACCATGATTGCTTGAGAAAAGAAAAGAATGAGTGGAAGGGTCGGAGTTGAAATATAAAAC…	TGCCTTCATTCATATACATGTACACCATGTGTGTGCCTGTTGCCATGGATCTCCTGGAACTGCAGTCACAGACAGTTGTACGCTGCGTGTGGGTGCTAGGAATGGAACTCTAGTGGAACATCCAGTGCTTCTAACCGCTGAACCATTTCTCCAGCTCCTGTTTCTGTTTCTTGAGACAGGGTCTCCTTAAGTCGTCCTGGCTGCCCTGGAACTTGCTCTATAGACCAGGTTGGTCTCAAACTCAGACTGCCTGCTTCTGCCTCCCGAGTGCCGGGATTAAAGACGTGCACTCCCACTGCCACCCAGCTCAAACACATTCTTTTTTTAAGACTAGAGAAGGCCATGATTGCTTGAGAAAAGAAAAGAATGAGTGGAAGGGTCGGAGTTGAAATATAAAAC…
chr15	92502988	92502989	125.5	22.5	B6xCAST	CGCACAAGCATGTGTGTGCATGTGTTTACTCATGTGTATGTCTGGGCACATGTGTATAGGTACACACACTACATGCCTGGTGAGAGCATGTGCTATAGAAGGTGTTTGAAAGTCTCAACTTTGTGGAGTTAGTTCCCCCTTTCACCTCTACACAGCTTTAGGGAAAGGAACTTCTGGTGACCAGACTTGACTGTCAAACTGAGCCATCTCACAAGCCCTCAGATGTCTTTAAGAGATATTTTAGGGTTATTTTGTCTTGTAGTAGTTTTTGTTTTTCATATCTTGGAAGCTGAATGGGTTCCATCACTGAATGCTCCATTGTATAGAGAGCATCCATATTTAAGAAACTTTCCCATTGATTGGCATGATTTGTTCACACCTTTGAATGATGCTTCTGGG…	CACACAAGCATGTGCGTGCATGTGTTTACTCATGTGTATGTCTGGGCACATGTGTATAGGTACACACACTACATGCCTGGTGAGAGCATGTGCTATAGAAGGTGTTTGAAAGTCTCAACTTTGTGGAGTTGGTTCCCCCTTTCACCTCTACACAGCTTTAGGGAAAGGAACTTCTGGTGACCAGACTTGACTGTCAAACTGAGCCATCTCACAAGCCCTCAGATGTCTTTAAGAGATATTTTAGGGTTATTTTGTCTTGTAGTAGTTTTTGTTTTTCATATCTTGGAAGCTGAATGGGTTCCATCACTGAATGCTCCATTGTATAGAGAGCATCCATATTTAAGAAACTTTCCCATTGATTGACATGATTTGTTCACACCTTTGAATGATGCTTCTGGG…
chr15	95142683	95142684	102	16.5	B6xCAST	TGGGGAGAGACAACAGTGAAATGGTGTGGTGTGGAATCTCAGTACAGAGAAGGAAAGGGCATGGCACAGACAGAGGGCACAAGGACAACCACTTGGTTCTATGCCTGTGCATACAGCATTAGAGGAGGTCCATCGTTAACCAAGTGACTTAACCAGAGATGCAGGCTTATACTTTATATCAGAGCTTCTAAAGTTGCTGGCATCAACACATCCTGGGAGCAGCAGTGAGAGGCTTGGCTCCTGACTTCTGATATGCATCAGGTTATTGGCAGTAGAGATTGTGGAGCTTAAGGGCCAAGACCTCAGAGGAAAACTCTAAAGACACTAGATCACTAGGTTTAAGATGAGGTGCAAGAAACACTTCTCCGTTTTGGTTGAGAATTCCATGAGTTTAACAAT…	GGGAGAGACAATAGTGAAATGGTGTGGTGTGGAATCTCAGTACAGAGAAGGAAAGGGCATGGCACAGACAGAGGGCACAAGGACAACCACTTGGTTCTATGTCTGTGCATACAGCATTAGAGGAGGTCCATTGTTAACCAAGTGACTTAACCAGAGATGCAGGCTTATACTTTATATCAGAGCTTCTAAAGTTGCTGGCATCAACACATCCTGGGAGCAGCAGTGAGAAGCTTGGCTCCTGACTTCTGATATGCATCAGGTTATTGGCAGTAGAGATTGTGGAGCTTAAGGGCCAAGACCTCAGAGGAAAACTCTAAAAAGACACTAGATCACTAGGTTTAAGATGAGGTGCAAGAAACACTTCTCCGTTTTGGTTGATAATTCCATGACTTTAACAAT…
chr15	95833409	95833410	219.5	36	B6xCAST	TAAATAAATAAGGCAGAAAGGAAAGCCAAATACTGTTTATATGTGGAATCTGAAAATGTCAAACTCACTGAAGCAGAGCGCTGAACCGTGGTTGTCAGGCCCTGGAGGAGGGGGAATGGGCAGGTACCATCAGCTGGTTCTTAAAGTTGAGGTGAGTGAGTTCTAGGGGTGCGGTGCCCAGCAGGGTGGGAGGTGGTATATGTGCTAATGAACTTGACTGCAGTGATCGACCCAGGATGTATATGTGCAGCGAAGCCTTATGGTCCGTGAATGGGTTCGGTCTGTGCCAGTTGCATATTTTAAAAGGACCACCTGTGGTTTAAAGTCATGGGTTTAGAAATTTGTGATTTTATTCTCAGATGTGTTTGATTTGGAGGAATTGGATGAGCAAAATGGTTG…	TAAATAAATAAGGCAGAAAGGAAAGCCAAATACTGTTTATATGTGGAATCTGAAAATGTCAAACTCACTGAAGCAGAGCGCTGAACCGTGGTTGTCAGGCCCTGGAGGAGGGGGAATGGGCAGGTGCCATCAGATGGTTCTTAAAGTTGAGGTGAGTGAGTTCTAGGGGTGCGGTGCCCAGCAGGGTGGGAGGTGGTATATGTGCTAATGAACTTGACTGCGGTGATCGACCCAGGATGTATATGTGCAGCGAAGCCTTATGGTCCGTGAATGGGTTCGATCTGTGCCAGTTGCATATTTTAAAAGGACCACCTGTGGTTTAAAGTCATGGGTTTAGAAATTTGTGATTTTATTCTCAGATGTGTTTGATTTGGAGGAATTGGATGAGCAAAATGGTTG…
chr15	97499537	97499538	63.5	5	B6xCAST	CAACAAAACAAGCAAAACCAAAATCAAAGAACAAAAATGAAAATGTGAGAAATCCCTTTGTGGGTTGTATTTGCTTTCTTACATATCCAGTTTTATAGGTACTGGTCAACGGGAGAAAAACTTTCAGTACAAAGATTCTTGCAAATGTCTGACGGAAGAGATGGGCCTCATAACAAAAGAAAACATGCAGATGTTAAAAGACAAACTTGGGTGCTTGAAAATTCTAATGAGCTTACATAAGCGCCAGGTGACTCATAGGTCGGGCAGCACACGACTCCAGGTAGATCTGTGCTCCAGCTCGGGTAAGAGAGAAGAGTTTTATTAGATATTCTTAGAAGCAAGGAAAAGAAAGTATGCTTGCCAAAGTGGAAAGTCCCCAGGGCAGCTGTTTCCCAACCT…	AACAAAACAAGCAAAACCAAAATCAAAGAACAAAAATGAAAATGTGAGAAATCCCTTTGTGGGTTGTATTTGCTTTCTTACATATCCAGTTTTATAGGTACTGGTCAACGGGAGAAAAAACTTTCAGTACAAAGATTCTTGCAAATGTCTGACGGAAGAGATGGGCCTCATAACAAAAGAAAACATGCAGATGTTAAAAGACAAACTTGGGTGCTTGAAAATTCTAATGAGCTTACATAAGCGCCAGGTGACTCATAGGTCGGGCAGCACTCGACTCCAGGTAGATCTGTGCTCCAGCTCGGATAAGAGAGAAGAGTTTTATTAGATATTCTTAGAAGCAAGGAAAAGAAAGTATGCTTGCCAAAGTGGAAAGTCTCCAGGGCAGCTGTTTCCCAACCT…
chr15	97560344	97560345	337.5	9.5	B6xCAST	AAAGTTTACCCGTCAGGCCCTCTGCTCCAGTCAGAGTCTGACTTACAGAGTGACAGTACACAGCCTGGAGCTGCAGACACAGCTGACAGTGAGAGAGCCCTTTTCTGCAGGGTTGAGAACAAGCTTGCCAAGGTACGTGGGTGAAGTTTCCACAGGACAGGGCAAGGTGATGACCAAATGTGTATCACATAGGAGAACTGAAAGACAAGGAACAGGATGAAGAAACATCCTAAAAATGGCTGATGGGGCAGGGTAGGGTGGGTTGAGGATGGGGCAGGGTGGGGAGGGGTGAGGATGGGGCAGGGTGGGGGTAGGGATCCTCCTGGGGGAAGGGCTTTCAAGAGGTGGTGATTTTTGTCCAGTGTGGTAGTACCGGTACAATAAGGGGTGGGGCTGAGG…	TCTGTACCATCCCCCAAATATGCCTTAAAGTTTACCCGTCAGGCCCTCTGCTCCAGTCAGAGTCTGACTTACAGAGTGACAGTACACAGCCTGGAGCTGCAGACACAGCTGACAGTGAGAGAGCCCTTTTCTGCAGGGTTGAGAACAAGCTTGCCAAGGTACGTGGATGAAGTTTCCACAGGACAGGGCAAGGTGATGACTAAATGTGTATCACATAGGAGAACTGAAAGACAAGGAACAGGATGAAGAAACATCCTAAAAATGGCTGATGGGGCAGGGTAGGGTGGGTTGAGGATGGGGCAGGGTGGGGGTAGGGATCCTCCTGGGGGAAGGGCTTTCAAGAGGTGGTGATTTTTGTCCAGTGTGGTAGTCCTGGTACAATAAGGGGTGGGGCTGAGG…
chr15	97755586	97755587	171	15	B6xCAST	ACCTGAACCTGTGCTGGGCTCACCAGGGCCCCAGCCTTAAAGTTACACCCCCATCCATCACCCAGTGCTCCAGGCTCTCACACCTGGGGGTCCCCTCATTCCTGTCCCTTCCGAGTTCATACTCCTCACTGCTCCCTAGAGATTACCACTTTCTTCTGGGTTCTTCACTTAAATGGGTCCCCAGTGCCGTCTCTCCTACCTCAAAAGTACCCCCCTCCCAACCGGGTGCAGCCACTCACTTCTAACCTATATGAGCAGAGCCACACTGAGCTGGGGACAGAATCCATCATTGCTTGTCCCCTTTAACCTCTCCAACAATTCCAAGGCGGGACCCTAGGAGGAGTCACTCTGGCCCCTGACCCCCTTCCTGGTCTCCTCTCCAGCCTCTAGCGCTGCCTG…	TGAACCTGTGCTGGGCTCACCAGGGCCCCAGCCTTAAAGTTACACCCCCATCCATCACCCAGTGCTCCCCCAGGCTCTCACACCTGGGGGTCCCCTCATCCCTGTCCCTTCTGAGTTCATACTCCTCACTGCTCCCTAGAGATTACCACTTTCTTCTGGGTTCTTCACTTAAATAGGTCCCCAATGCCGTCTCTCCTACCTCAAAAGTACCCCCCTCCCAACCGGGTGCAGCCACTCACTTCTAACCTATATGAGCAGAGCCATACTGAGCTGGGGACAGAATCCATCATTGCTTGTCCCCTTTAACCTCTCCAACAATTCCAAGGCGGGACCCTAGTAGGAGTCACTCTGGCCCCTGACCTCCTTCCTGGTCTCCTCTCCAGCCTCTAGCGCTGCCTG…
chr16	16353708	16353709	136.5	13.5	B6xCAST	GTACATCCAGTTTCAAAAAGCATACTACTGGAATTAAAGACAAGATTAAAATCGGCCATCTAACAGTAAATGACTTCAATACTGCACTTCATTTCTCCAAAAGCAGGTTGTCTGGACAAAAACAAAAAACAAAAAGCAAACAAAACTAAAAAAACTAAGAACACCGGGATAAAGTGATATCATACATCAGAGGAACCACTACAGGCTATTCCATCCAAATGCTGAAGTACATTCTACTCAGCCAGCCATGGAAACTTTTCTCAAAACAGATCACATTCTGAAACAAAAAAACAAAACAAAACAAAACAAAAAACCAAATCTTAAGAAACAGACAAAAACTGAAGTACTTCATGTATCCTATCTGACTATATTGGTCAGGGTTAACAGAACTAATTATTT…	GGTACATCCAGTTTCAAAGAGCATACTACTGGAATTAAAGACAAGATTAAAAACGGCCGTCTTACAGTAAATGACTTCAATACTGCACTTCATTTCTCCAAAAGCAGGTTGTCTGGACAAAAACAAAAAACAAAAAGCAAACAAAACTAAAAAAACTAAGAACACCGGGATAAAGTGATATCATACATCAGAGGAACCACTACAGGCTATTCCATCCAAATGCTGAAGTACATTCTACTCAGCCAGCCATGGAAACTTTTCTCAAAACAGACCACATTCTGAAACAAAAAAAAAAACAAAAAAAAAACCAAATCTTAAGAAACAGACAAAAACTGAAGTACTTCATGTATCCTATCTGACTATATTGGTCAGAGTTAACAGAACTAATTATTTACACAC…
chr16	17733109	17733110	191	23.5	B6xCAST	AATCTCCCCTCTATCAAGAGCCAGGAATCACTGAGGATGAGGAGACAGAAAGAATGTAGGAACGGGAGGGTGGCTGGGCATTGGTTGCACATACTTTTAATCGCAGCACGTGGGAGGCAGAGGCGGGGGGATTTTGAGTTCCAGGCCAGCCCAGTCTACAGAGTGAGTTCCAGGACAACCAGGGCTACACAGAGAAACCCTGTCTCAAAAAAACAAACCAAAACAAAAAAAACAAAAAACAAAAAACAAAGAGAGAGAGAGAGAGAGAGAGAGAGGAGTAGGGCTGGTAGGGTTGTGAAATTTGATTTTGTTGGGTATCTTGTCATACGGGGGGGGGGGGGGGAGTAGCTGGTATGTGGTAGAGCCTAAGAACAGAAATTCCTGGAAAGAAGCAGTGCC…	ACCAAAATAAAACCTCCCCTCTATCAAGAGTCAGGAATCACTGAGGACGAGGAGACAGAAAGAATGTAGGAACGGGAGGGTGGCTGGGCATTGGTTGCACATACTTTTAATCGCAGCACGTGGGAGGCAGAGGCGGGCGGATTTTGAGTTCCAGGTCTACAGAGTGAGTTCCAGGACAACCAGAGCTACACAGAGAAACCCAGTCTCAAAAAACAAAACAAAACAAAAAAAACAAAAAACAAAAAACAAAGAGAGAGAGAGAGAGAGAGAGAGAGGAGTAGGGCTGGTAGGGTTGTGAAATTTGATTTTGTTGGGTATCTTGTCATACGGGGGGGGGGGGGGGAGTAGCTGGTATGTGGTAGAGCCTAAGAACAGAAATTCCTGGAAAGAAGCAGTGCC…
chr16	22133573	22133574	172	27	B6xCAST	GAGATGGGGGGAGGGAGAAAGAGGAACCAGGTGCAGCAATCAGGCCTAAGGTAGAATTATTATGGGAGGGGCAGTTCAAGCCCTGAGCTGGAGAGTTTAGGGTAGGGGTAGGGTATACCAGCCAGGAGAGCTCTGTGACAGGTGGGGACTGAGGGAGAACCTGGTGGCCAGTGTCCGCCTTGATATGTTAAATAGGCACCTCAGCCACTTGTCCCAGGCTTGAAAGCTAACACAGAGAAATACACACATGCACAAAGACACACAGAAATAAACAGACACACACTTTTAAGAGACAAGAGAGAGACAAATGCCATACACTGCTCTTTCTGGCTTGCTGAATTTCCCACCATTTCACGGGGGCTTTAGACACTCCGGACCCCATTCTCACCGGGGACTCTT…	GAGATGGGGGGAGGGAGAAAGGGGAAACAAGTGCAGCAATCAGGCCTAAGGTAGAATTATTATGGGAGGGGCAGCTCAAGCCCTGAGCTGGAGAGGTTAGGGTAGGGGTAGGGTATGCCAGCCAGGAGAGCTCTGTGACAGGTGGGGACTGAGGGAGAACCTGGTGGCCAGTGTCCGCCTTGATATGTTAAATAGGCACCTCAGCCACTTGTCCCAGGCTTGAAAGCTAACACAGAGAAATACACACATGCACAAAGACACACAGAAATAAACAGACACACACTTTTAAGAGACAAGAGAGAGACAAATGCCATACACTGCTCTTTCTGGCTTGCTGAATTTCCCACCATTTCACGGGGGCTTTAGACACTCCGGACCCCATTCTCACTGGGGACTCTT…
chr16	22839661	22839662	202.5	22	B6xCAST	ATCTACAAAGAAGCTATTTCTTCCCACAGGAGAAGATGTAGACTTTGTCAAGCACACCCTGGAGGAGAGCTATGGCTCAAGTGTAGCCTCTGTGTAAAATGAACAATAAACTGTTGTTACATTATGTAGCCTCTACATTTCAATGTTTCCTTCCCCCACCCAGCAAAGCCATTTAACACTAAGTAGCTCCAAAATACAGAAATGTGGTTTCTTGAGTCACTGCTCACACAAGAGCCCAGAGATTCATCCTATCAAGTGCAGCTGTGTAGGACTGTTGATCAAATAATAAACAGTTATCAGCCTAAGCCGCTGTTGCTATAATTAATGTACTATAAATAATTAATATACTCTGTGAAGTCATTTCTATCATAAGAATGAAAAACCCTCAAGCCCTTTTCT…	ATCTACAAAGAAGCTATTTCTTCCCACAGGAGAAGATGTAGACTTTGTCAAGCACACCCTGGAGGAGAGCTATGGCTCAAGTGTAGCCTCTGTGTAAAATGAACAATAAACTGTTGTTACATTATGTAGCCTCTACATTTCAATGTTTCCTTCCCCCACCCAGCAAAGCCATTTAACACTAAGTAGCTCCAAAATACAGAAATGTGGTTTCTTGAGTCACTGCTCACACAAGAGCCCAGAGATTCATCCTATCAAGTGCAGCTGTGTAGGACTGTTGATCAAATAAGAAACAGTTATCAGCCTAAGCCGCTGTTGCTATAATTAATGTACTATATATAATTAATATACTCTGTGAAGCCATTTCTATCATAAGAATGAAAAACCCTCAAGCCCTTTTCT…
chr16	30531006	30531007	92.5	11.5	B6xCAST	AAAATAAAATAAAATAAAATAAAATAAAATAAAATAAAAAGATTCCTGCTGTTGCTACTTTTCCCTCTCCACCTTGGGTTTGCAAGCCTCAGTTTCCGGTAGCCAGCTCCAGGGTCCAGTCTGCTTCCTCTGCCACCACCACTATGGAACTGGAAGCCTAAATAAACCCTTCCTTCTCTAATTTGCATTGGCCATGGTATTTTCTTGCCACAGTAGAAAAGTAACGAACACAGCCAGACATCTAAAATTTCAGGGTACACAGAGAATCACTAGGAATTTCTGTATTAAAGGGATGGGGGGTACATTTGTAACCACGACAACTATTGCCCAAAACACATGCCACCAAGACTTTATCAGCTCACACTAGAGCAGCATTAGATAGAGTGGTGGGGAAACTGG…	AAATAAAATAAAATAAAATAAAATAAAATAAAATAAAAAGATTCCTGCTGTTGCTACTTTTCCTTCTCCACCTTGGGTTTGCGAGCCTCAGTTTCCGGTAGCCAGCTCCAGGGTCCAGTCTGCTTCCTCTGCCGCCACCACTATGGAACTGGAAGCCTAAATAAACCCTTCCTTCTCTAATTTGCATTGGCCATGGTATTTTCTTGCCATAGTAGAAAAGTAACGAACACAGCCAGACATCTAAAATTTCAGGGTACACAGAGAATCACTAGGAATTTCTGTATTAAAGGGATGGGGGGGTACATTTGTAACCACGACAACTATTGCCCAAAACACATGCCACCAAGACTTTATCAGCTCACACTAGAGCAGCATTAGATAGAGTGGTGGGGAAACTGG…
chr16	44002285	44002286	121.5	19	B6xCAST	AACCTCCAGAAAATTAAAAAAACGCAGATTCAGCACTGTACTCCTTTGAAAGATCTGATGGGCCTGAGACTTGAAATTCACTTAGGGAAAACAGTGGAAATACCCAAGTTATCCTCTGATGATCATCTGACAAAAAAACCCAACTCCTTAAGAATACTAAGGGGAAAATAATGTAGATGCTCCCTGCTAAACCAGGCAGATTTTAAGGAGGCACCAATAAGGAACACAAAATGACCGGGGCTCACGTACAGAAACTGCACACTACTTTCTGTTATTCCTAGATGTGTGTGCGGCCTTTGAGTTTTAACGTTACCCTGCTAGAAACTCAATGATGAAATGACTTTAAAAGGACGATTCTTTTAAGAGTAGGTTTGAACAAAGAGAAAATAACTCCTTGTT…	AACCTCCAGAAAATTAAAAAAACGCAGATTCAGCACTGTACTCCTTTGAAAGATCTGATGGGCCTGAGACTCAAAATTCACTTAGGGAAAACAGTGGAAATACCCAAGTTATCCTCTGATGATCATCTGACAAAAAAACCCAACTCCTTAAGAATACTAAGGGGAAAATAATGTAGATGCTCCCTGCTAAACCAGGCAGATTTTAAGGAGGCACCAATAAGGAACACAAAATGACCGGGGCTCACGTACAGAAACTGCACACTACTTTCTGTTATTCCTAGATGTGTGTGCAGTCTTTGAGTTTTAACGTTACCCTGCTAGAAACTCAATGATGAAATGACTTTAAAAGGACGATTCTTTTAAGAGTAGGTTTGAACAAAGAGAAAATAACTCCTTGTT…
chr16	45936594	45936595	454	53	B6xCAST	TGAGTCATTACTGTGTTCCTTTCTTCTTTAATCGTTGGCCCTGTTGTTTCTTGCTTTCAAACTGCACAGCAGCCAACTCTTACTGAACAGTATCCAGAGTTAACACTTCCTTGTGTTCTCTCTTGTCTTCTTTCCTTCAACCTCCTCCACTCCCCACCCCCTCCCCACGGCCACTCCCCTTTCTGTCTTTTCAGGGCTCACACATGCTAAGCAAGCTCTTTACCACTGGGCTACAAGCCCATGGTATCCCTTCAGGACTTCTGCCTAGGTCTCCAATCTCCTTTCAGGTTTTAACTGTGCCTCTGAAACTACAGTAGCCATCTTGAAAGAACAGGTAATGTGTTCTATTTCTCTTCACCCTTCATTTGTGGGAAATGCAGTGATTTGTGCTCAGTTGAA…	AGTTATTACTGTGTTCCTTTCTTCTTTAATCGTTGGCCCTGTTGTTTCTTGCTTTCAAACTGCACAGCAGCCAATTCTTACTGAACATTATCCAGAGAGTTAACACTTACTTGTGTTCTCTCTTGTCTTCTTTCCTTCAACCTCCTCCACTCCCCACCCCCTCCCCACGGCCACTCCCCTTTCTGTCTTTTCAGGGCTCACACATGCTAAGCAAGCTCTTTACCACTGGGCTACAAGCCCATGGTATCTCTTCAGGACTTCTGCCTAGGTCTCCAATCTCCTTTAAGGTTTTAACTGTGCCTCTGAAACTACAGTAGCCATCTTGAAAGAACAGGTAATGTGTTCTATTTCTCTTCACCCTTCATTTGTGGGAAATACAGTGATTTGTGCTCAGTTGAA…
chr16	45937651	45937652	647	74.5	B6xCAST	TGTAAAAATTAAATGTAGGTTGACAAATTAAATTTAACACCACCACCCTCCAGGATGTTATGGACATGGAAGAGGTGAAAACAAACAAGGGAGAAGTTTTTGTAATAGGCTAATGTAAAGTCGGATTCAATAAGGCACTGGAATTACATTTCTAGATATAATCTAGTGCAAAGCATATTATGACACGGTTGCCATTAATTTTTTATTATGTGTGTGTGAGTGTGTTAGTGTGTGTGTGCATGTGTGTGTGTTTGTGTGGTGTGTATGTAACAAGACATGAGCATGCCACAGTACTATATGAAGGTTGTGGCAACCATGAAGTCTTAGGGCAACTGGACCTTCCCTAGGTCCTGGGGATAGAACTTAAGTCACTCAGCTTGGCAGCAAACATACTTACCC…	TTGTAAAATTAAATGTAGGTTGACAAATTAAATTTAACACCACCACCCTCCAGGATGTTATGGACATGGAAGAGATGAAAACAAACAAGGGAGAAGTTTTTGTAATAGGCTAATGTAAAGTCGGATTCAATAAGGCACTGGAATTACATTTCTAGATATAATCTAGTGCAAAGCATATTATGACACGGTTGCCATTAACTTTTTATTATGTGTGTGTGAGTGTGTTAGTGTGTGTGTGCATGTGTGTGTGTTTGTGTGGTGTGTATGTAACAAGACATGAGCATGCCACAGTACTATATGAAGGTTGTGGCAACCATGAGGTCTTAGGGCAACTGGACCTTCCCTAGGTCCTGGGGATAGAACTTAAGTCACTCAGCTTGGCAGCAAACATACTTACCC…
chr16	48304204	48304205	366	23	B6xCAST	TGACTTCCAGCTGAGTCACTAAACCAGGGAAGCTGGCTTAGTTTTCCTGAGAGGAAGAGGTTTGGCTAGTCACAATCCTTTGTTTGCAATAAGCGTAGCCATTTATTTGAGCCAATCACAGTCTTGCCTCGTAGCATCAATCCCAGTGATTGAAGCTTGTGTCTTAGACCAGTCATAACTTTACCTCTTAACGCCAGGCATCCATCTGCTAGGGCATCTTCAGGTCAGTGCTTCCCCACTGGCCAGGCAGAAATGATTCCAGAGTCATCTAGAAACCATCAGACAGGACTTGTGAAAACAGAAGTCTAGAACCAACTGTTTCCAGCTCGCTTTGATCCCAATACTCGGAAGGCAGAGGAAGGAAGATCTCTGTGAGTTCCAAGTTAGCCTTATCTGAAC…	AGTGACTTCCAGCTGAGTCACTAAACCAGGGAAGCTGGCTTAGTTTTCCTGAGGAAGAGGTTTGGCTAGTCACAATCCTTTGTTTGCAATAAGCGTAGCCATTTATTTGAGCCAATCACAGTCTTGCCTCGTAGCAGCAATCCCAGTGATTGAAACTTGTGTCTTAGACCAGTCATAACTTTACCTCTTAACGCCAGGCATCCATCTGCTAGGGCATCTTCAGGTCAGTGCTTCCCCACTGGCCAGGCAGAAATTATTTCAGAGTCATCTAGAAACCATCAGACAGGACTTATGAAAACAGAAGTCTAGAACCAACTGTTTCCAGCTCGCTTTGATCCCAATACTCGGAAGGCAGAGGAAGGAAGATCTCTGTGAGTTCCAAGCTAGCTTTATCTGAAC…
chr16	57401932	57401933	672	33.5	B6xCAST	CCAAGCAGAAACCATGTGCACCATTTGAACTGTGAACATTTCCCAAGTCTTTGATCAGTGTCTTCCTTCCTCCATTCCAGACCCTTGTGGCCTGTGGAGAATTCCGAGGACCTTAAGCAAGTTCTGTGAACCTAGGGTTGTATTTATTAAAACTTAAAGAATGAAAACCAGCTATGTCATAAATGAAGTCAATAGACCCCAGAGCACTGAACCCAGCACGGTCCTGGCAAGCCACATTGGTCCGACACCTGAGAAGTGTTTTCCAAGTTAGAAAGAAAAAGGGAGCAGCGTGCACTGCATTTGTGTGACGTTGTTGGGACGGGAAGTTGGAAAAAGCCAGTGGAGGCCTGGAGTTGGTGACAAATTGGTCCTTTAAGATACACAGGAAATACTCAGAGG…	CCAAGCAGAAACCATGTGCACCATTTGAACTGTGAACATTTCCCAAGTCTTTGATCAGTGTCTTCCTTCCTCCATTCCAGACCCTTGTAGCCTGTGGAGAATTCCGAGGACCTTAAGCAAGTTCTGTGAACCTAGGGTTGTATTTATTAAAACTTAAAGAATGAAAACCAGCTATGTCATAAATGAAGTCAATAGACCCCAGAGCACTGAACCCAGCACGGTCCTGGCAAGCCACATTGGTCCGACACCTGAGAAGTGTTTTCCAAGTTAGAAAGAAAAAGGGAGCAGCGTGCACTGCATTTGTGTGACGTTGTTGGGACGGGAAGTTGGAAAAAGCCAGTGGAGGCCTGGAGTTGGTGACAAATTGGTCCTTTAAGATACACAGGAAATACTCAGAGG…
chr16	66627712	66627713	871	51.5	B6xCAST	GTTCTTCCATCTATTTTCACCCCTCTGATTCACTGAATTACTTTGAATTACCCATTGAAAGTGAGTTACAGTCACAAATGCAGTTTGCCCCTGGCTATTTCAGAACACAGCACCCAATATTTCTACATTTTATAGTATAAAATTTAGATATATAAAACACTAACTTTTACTGTCAAAAGGTTTGTATATAGCTATCAGCTATGAACTCTAAATCTCTGTCAATAAATATGTTACTATTTCTCAAAAAATAATACCATAGTAATTCTTGGTCAGTAAAGTGCACCAATTATGCTATCCTCACGTACAACTCTGAATTTTCTACATTATATTTAGAAAAGTTTTGTTTTATTAAAAATGTGGACACCTTGCTCATTATCCCAGGGTGAGCTCAAATATTTT…	GTTCTTCCATCTATTTTCACCCCTCTGATTCACTGAATTACTTTGAATTACCCATTGAAAGTGAGTTACAGTCACAAATGCAGTTTGCCCCTGGCTATTTCAGAACACAGCACCCAATATTTCTACATTTTATAGTATAAAATTTAGATATATAAAACACTAACTTTTACTGTCAAAAGGTTTGTATATAGCTATCAGCTATGAACTCTAAATCTCTGTCAATAAATATGTTACTATTTCTCAAAAAATAATACCATAGTAATTCTTGGTCAGTAAAGTGCACCAATTATGCTATCCTCACGTAAAACTCTGAATTTTCTACATTATATTTAGAAAAGTTTTGTTTTATTAAAAATGTGGACACCTTGCTCATTATCCCAGGGTGAGCTCAAATATTTT…
chr16	66632804	66632805	243	28	B6xCAST	AAATGATCTTTTAACCTTTTCAGCCTTCCTTCTTTCTTTTACTCAAGACTCATTCTACATAATTAGGTCTTCTCAGTCTTTGAGAGTGATTCAAAACTCTAAGCTCAGCTAATGTTCAAAGCCATCATATATTATTTAAGAAAAGATCTGTGTTGGATGCATTCCTGTAGACATTAGCCTCCAGGGAGAACTCTGAAAATTTTGCTTAGTGGTTAAGTCTAGACAACATTTGTTTGGAAACATTGAGACTTCCTAATGCATCCTCCAAATGCAGTGAACTGCCAGGACATGCTTTGTTTCCTAGTACTGTTATCTTATTTGAGAATTCACACTGAAGCAAACTTTATATCTTATAACGTTTTAAGCACTTCAAGTGAAATTACACAAAATGTCTGGCAG…	AAATGATCTTTTAACCTTTTCAGCCTTCCTTCTTTCTTTTACTCAAGACTCGTTCTACATAATTAGGTCTTCTCAGTCTTTGAGAGTGATTCAAAACTCTAAGCTCAGCTAATGTTCAAAGCCATCATATATTATTTAAGAAAAGATCTGTGTTGGATGCATTCCTGTAGACATTAGCCTTCAGGGAGAACTCTGAAAATTTTGCTTAGTGGTTAAGTCTAGACAACATTTGTTTGGAAACATTGAGACTTCCTAATGCATCCTCCAAATGCAGTGAACTGCCAGGACATGCTTTGTTTCCTAGTACTGTTATCTTATTTGAGAATTCACACTGAAGCAAACTTTATATCTTATAACGTTTTAAGCACTTCAAGTGAAATTACACAAAATGTCTGGCAG…
chr16	66643777	66643778	811.5	80.5	B6xCAST	CAGATCGTCCCTGTTGTTTAGTGATTCATCCATCAAATATTGACTGCCTTATGAAATCAAGTCAGGTGTATCCATCTAAAAGGTTATTTTCCCACTTATATTTTTAGACAAATCTTCTGAATATTTCATCATGCAAATAAAACCTTAAAATTTAATGTTGTGAAACATTTATTCTGCCTTTGGATCTGGTATTAGGTCTGCTACCTCAGCACAATTTGATTTCACTCTAGTCTATCAGCTAGGGTTGCTGGAAGCCTGTGGTCTGGGACCATAGGAAATATCATTGATTCACATGCTAGTGCCTGGGCTTAAAAGCTTTGGCTGAAATGTGAAACAGCTGAAACTCTTTGGGAATCTCCCTTTATGTCTTCGTGATTTTTTTCCCCCTGCACAGAAACT…	CAGATTGTTCCTGTTGTTTAGTGATTCATCCATCAAATATTGACTGCCTTATGAAATCAAGTCAGGTGTATCCATCTAAAAGGTTATTTTCCCACTTATATTTTCAGACAAATCTTCTGAATATTTCATCATGCAAATAAAACCTTAAAATTTAATGTTGTGAAACATTTATTCTGCCTTTGGATCTGGTATTAGATCTGCTACCTCAGCACAATTTGATTTCACTCTAGTCTATCAGCTAGGATTGCTGGGAGCCTGTGGTCTGGGACCATAGGAAATCTCATTGATTCACATGCTAGTGCCTGGGCTTAAAAGCTTTGGCTGAAATGTGAAACAGCTGAAACTCTTTGGGAATCTCCCTTTATGTCTTCGTGATTTTTTTCCCCCTGCACAGAAACT…
chr16	68635334	68635335	229.5	17.5	B6xCAST	CGCTTATACTTGGCGTATATTTAAAAATTATATCATGCAATATGTAAAGGCACTGGCTTGTCTTCTCATTCAGGGTATGTAATGATTAATTTTATATATCACATTATTCAAGGTGAAGATTATGCAAATTAAATAATTTTGTGGTATTTTGAAGGATATATAAAAAAAAAAAGACTGAAGACAGAGAAGTTGCCTGTTTCCTGTTGTCTGGTGGAGCTCTGAATCCAATTCTTTCCTATCTTTAGGATGGAATCATCACCACAAATACCATTGGCCCTTAGGCTTTCAGGTGTGATTAGAATAACACTAATAACTTCCTTGTTATCTCCAACTTGGCTGACTCCTAATACTGAAATTTAACAGCCTACATAAACAAAAAACACCAATAGTTCATGATGA…	AGCTTATACTTGGCGTATATTTAAAAATTATATCATGCAATATGTAAAGGCACTGGCTTGTCTTCTCATTCAGGGTATGTAATGATTAATTTTATATATCACATTATTCAAGGTGAAGATTATGCAAATTAAATAATTTTGTGGTATTTTGAAGGATATATAAAAAAAAAAAGACTGAAGACAGAGAAGTTGCCTGTTTCCTGTTGTCTGGTAGAGCTCTGAATCCAATTCTTTCCTATCTTTAGGATGGAATCATCACCACAAATACCATTGGCCCTTAGGCTTTCAGGTGTGATTAGAATAACACTAATAACTTCCTTGTTATCTCCAACTTGGCTGACTCCTAATACTGAAATTTAACAGCCTACATAAACAAAAAACACCAATAGTTCATGACAA…
chr16	78060726	78060727	284	46	B6xCAST	CCTCCTCTCCCCTCCCCCTCTCCCTCTCTCTCTCCCCCTCTCCTTCTCCCTCTCTCCCTCTCTTCCTCTTTCCCTCTCTCTCTCCCCCCTCCCTCTCCCTCTCCTTCTCTCCCTCTCCCTCTCCCTCTCCCTCTCACCTCTCTCCTCTTACCCTCCCCCTTTCTCCCTCTCTCTCTCCCTCTCCCTTTCTCTCACACACAGAGTCAGACAGACAGACAGACAGACAGGACAAATCATTGGGGAAGAGCACCATGTACTTCCTATGCTCATCCAAACATACCATGAGACAAGCAAGGAATGAATGACCCAGAATTTTTAGTGGTGGCTGGAGGAGGGCCTGTAGCAATGGTGGCCACATCCACAGGGTTTTCTGTGGTTTGAGCTTCCCTGGCTTCCAAA…	CCTCTCTCTCCTCCTCTCCCCTCCCCCTCTCCCTCTCTCTCTCCCCCTCTCCTTCTCCCTCTCTCCCTCTCTTCCTCTTTCCCTCTCTCTCTCCCCCCTCCCTCTCCCTCTCCTTCTCTCCCTCTCCCTCTCCCTCTCCCTCTCACCTCTCTCCTCTTACCCTCCCCCTTTCTCCCTCTCTCTCTCCCTCTCCCTTTCTCTCACACACAGAGACAGACAGACAGACAGGACAAATCATTGGGGAACAGCACCATGTACTTCCTATGCTCATCCAAACATACCATGAGACAAGGAATGAGTGACCCAGAATTTTTAGTGATGGCTGGAGGAGGGCCTGTAGCAATGGTGGCCACATCCACAGGGTTTTCTGTGGTTTGAGCTTCCCTGGCTTCCAAAGGA…
chr16	86304048	86304049	596	54.5	B6xCAST	CTCCTCTCCATCCCGTCCTCTCAGATCCCATATCACCTCTCCTCTCCCCCAGACCCAGTGTTCCTCCATTTCCCTTCAGAGAAGAACAGGCCTCCCTGTGGTATCAAACTTGGTACAATAAGATTCAATAATACTAGGGATATGCCCTCCTTCAAGGCTAGATGAAGTCCTACGGTGTGGCAAAAGAGTCAATGGCACTGCCCACTGCCATTGCTAGGAGTCCAACAAAACTCAAGGTAAATAACTACAGCATGTATGCAGAGGATATGGCGCAGACCCATGCAGGATCCGTGGGTGGCTGCTGCTTCAGTCTCTATGATCTCTGATGAGCACGGCTTAGTTGTTACTGATGGCAGTGTTCTGGTGTCCTGTACTCCTGGGTTTTCAAAGGGTCACAAG…	CTCCTCTCCATCCCGTCCTCTCAGATCCCATATCACCTCTCCTCTCCCCCAGACCCAGTGTTCCTCCATTTCCCTTCAGAGAAGAACAGGCCTCCCTGTGGTATCAAACTTGGTACAATAAGATTCAATAATACTAGGGATATGCCCTCCTTCAAGGCTAGATGAAGTCCTACGGTGTGGCAAAAGAGTCAATGGCACTGCCCACTGCCATTGCTAGGAGTCCAACAAAACTCAAGGTAAATAACTACAGCATGTATGCAGAGGATATGGCGCAGACCCATGCAGGATCCGTGGGTGGCTGCTGCTTCAGTCTCTATGATCTCTGATGAGCACGGCTTAGTTGTTACTGATGGCAGTGTTCTGGTGTCCTGTACTCCTGGGTTTTCAAAGGGTCACAAG…
chr17	3791188	3791189	195.5	34	B6xCAST	CCAGTCCTCTTTGCTTCTGAGAGGGTGCTACTCATGGACCCACCCCACCTTATTCCTGTTAGCATCCTCCTTCCCCAGGGGGATCAAGTTTCTACAGGATTAAGCATGTCCTTTCCCACTAAGGCCAGACAAGGCAGTTCTCTGCCACAAATGTGTTGGGAGGCACAGACCAACTCATGTATGCTCTTTGGTTGGTGGCTTAGTCTCTGACATAATGATGTAAATACAGTGTTCATGTGAAATTCTTAAAAAATTAAAACTTTTTAAAAAATCTGAAAGGATTTATCAATGGGATGTGCAATTAAAATTTAAGTATTTCATTAATATATAATAACTGTCAGATATGATTCTGATAGCTACTATAATGCACATATAATACACTTAAAAGGTGCAAAGCTT…	CCAGTCCTCTTTGCTTCTGAGAGGGTGCTACTCATGGACCCACCCCACCTTATTCCTGTTAGCATCCTCCTTCCCCAGGGGGATCAAGTTTCTACAGGATTAAGCATGTCCTTTCCCACTGAGGCCAGACTAGGCAGTTCTCTGCCACAGATGTGTTGGGAGGCACAGACCAACTCATGTATGCTCTTTGGTTGGTGGCTTAGTCTCTGACATAATGATGTAAATACAGTGTTCATGTGAAATTCTTAAAAAATTAAAACTTTAAAAAAAATCTGAAAGGATTTATCAATGGGATGTGCAATTAAAATTTAAGCATTTCATTAATATATAGTAACTGTCAGATATGATTCTGATAGCTACTATAATGCACATATAATACACTTAAAAGGTGCAAAGCTT…
chr17	5741329	5741330	933	10.5	B6xCAST	CAGCCACTGCCACTGTATCCCAGCCTTTAGCCTTTTCTGTAAGCAGAGAGCTCCGCCACCTGAATGTGCGACCAGGAGCTAGACAGAAGTCTTCTTTGTGGCAGTGCCTGGCAGTGTTACTCCTTGAAGTAATGACTTTGACAAGATCAAATTAGTCCATGTGCCAAGAGAGCATTTAATCCACAGGAAGCTATGGATAAGTGCCTACGTGCTTTCCAGGATGACCAAAGAGAAAAGAAAAGAAAAGAAAAGAACATCGAGACCTGGAAAAAAAATATGCAAGTTCTAACTGTGAGAACTTCGGAATCAGAATTGGCAAATGCCTAGTTTCTGTGAGTCTCTGAATATGCCGGCTTCGTTAATCATGAAATTTAGCATTCATGAAATATTAACCACATT…	AGCCACTGCCACTGTATCCCAGCCGTTAGCCTTTTCTGTAAGCAGAGAGCTCCGCCCACCTGAATGTGCGACCAGGAGCTAGACAGAAGTCTTCTTTGTGGCAGTGCCTGGCAGTGTTACTCCTTGAAGTAATGACTTTGATAAGATCAAATTAGTCCATGTGCCAAGAGAGCATTTAATCCACAGGAAGCTATGGATAAGTGCCTACGTGCTTTCCAGGATGACCAAAGAGAAAAGAAAAGAAAAGAAAAGAACATCGAGACCTGGAAAAAAAATATGCAAGTTCTAACTGTGAGAACTTCGGAATCAGAATTAGCAAATGCCTAGTTTCTGTGAGTCTCTGAATATGCCGGCTTCGTTAATCATGAAATTTAGCATTCATGAAATATTAACCACATT…
chr17	5742435	5742436	388	26.5	B6xCAST	GGGCTGAGTGCTCCTAGCAATGGCTGACCGAGGATAGCTCAATGCCAGCCTTCCTTCAGGATCAGTACCTCCAGTACAGATGCTACCTGGCCCCATCCTGTTTTGTCACCATGCCGCCACTGTTCGGTGCTGCAGTCTGCTTATTGGCCACCTGTCTTCTGTTTTTCCTACTGCTGTGATAAAGACCAAAAGGGCAACTTATGGAGGAAAGGGTTCCTTTGCCTTATCTACCCTGAGTCACAGTTCATGGAGGGAAACCAAAGCAGGAACTTTACACAGGAACTGAAGCGAAAACCTTGGAGGAATAATGCTGGCGTCTGGCTTGCGTCCCATGGCTTGCTCAGCCTGCCTGCTTAGAGAACTGAGGACCACCAGTCCTGGGATGGCACAACCCATGGT…	GAGCTGAGTGCTCCTAGCAATGGCTGACCGAGGATAGCTCAATGCCAGCCTTCCTTCAGGATCAGTCCCTCCAGTACAGATGCTACCTGGCCCCATCCTGTTTTGTCACCATGCCGCCACTGTTCGGTCCTGCAGTCTGCTTATTGGCCATCTGTCTTCTGTTTTTCCTATTGCTGTGATAAAGACCAAAAGGGCAACTTATGGAGGAAAGGGTTCCTTTGCCTTATCTACCCTGAGTCACAGTTCATGGAGGGAAACCAAAGCAGGAATTTTACACAGGAACTGAAGCGAAAACCTTGGAGGAATAATGCTGGCGTCTGGCTTGCGCCCCATGGCTTGCTCAGCCTGCCTGCTTAGAGAACTGAGGACCACCAGTCCTGGGATGACACAACCCATGGT…
chr17	24822088	24822089	111	16	B6xCAST	CAGCAGGACTTTCTCCCTACTCTTAGTGTTGGAATCCAGATCACATTCTGAGATGACTTGAATTTTTTATGATTCCTGCTCACATATATGAGCTTATGAGATTAAGTGTATTTTGTATCATGTTCTACCCATGCCTAGATCAGAGACAGTCACATAATTGATTTTTAGTAAATATGTATGGGAGGTGGGAGGGACATGTTTGGTAGACCCAACAAATGTGAAACCTCTTGGCATTTTCCAGAATATCTTGAATAATTAACTTTTAGGTTGAGCAACAGCAAACTGCTGACATTTAACAAATATTCACCTAAAATAGCAATTTCATAGCCTAATAACCTGGCATAGCTGGACTCCAGAGCAGTGAGGAAAGGGAGGAGCAGAGACACTTCTTAGTGATGT…	TCACTCAGCAGGACTTTCTCCCTACTCTTAGTGTTGGAATCCAGATCATATTCTGAGATGACTTGAATTTTTTATGATTCCTGCTCACATATATGAGCTTATGAGATTAAGTGTATTTTGTATCATGTTCTACCCATGCCTAGATTAGAGACAGTCACATAATTGATTTTTAGTAAATATGTATGGGAGGTGGAAGGGACATGTTTGGTAGACCCAACAAATGTGAAACCTCTTGGCATTTTCCAGAATATCTTGAATAATTAACTTTTAGGTTGAGCAACAGCAAACTGCTGACATTTAACAAATATTCACCTAAAATAGCAATTTCCCTAATAACCTGGCATAGCTGGACTCCAGAGCAGTGAGGAAAGGGAGGAGCAGAGACACTTCTTAGTGATG…
chr17	26882909	26882910	91.5	14.5	B6xCAST	GGAAGGTTTTCAAACAATCCACACACTCTCCACTGCATTCTACGCCATCTCTGTGTTGCTTGGAAAGTCTGGGTAAATACTTGTTGCTTTGTGTTGTTCAGCCTTGTACATACTTAGTGCAGACCCAATTTCCCCAATGTCCTTGGTCCCCGCTTGTGAATATGCAGATATTGGTTTGATGTGCAGACCTGGGACCTCTGGCACAAAAGGTTGCCTGAGATTGAGACCTGGGGAATAGGGAGCTGACAGGGTGGGGGTGGGGGCACTTAGCTCAGACTTGGAAGAGGGCTGAGTTCTCCAGAGACCTCCCCACATGGTCCCAGACCACTAAGTTCAGAGAGAAAGGTGACCTCACATTTTTAATAATCTCTGGCATGGAGCTGGTTCCCTAGGGCCCGT…	ATGGAAGGTTTTTAAACAATCCACACACTCTCCACTGCATTCTACGCCATCTCTGTGTTGCTTGGAAAGTCTGGGTAAATACTTGTTACTTTGTGTTGTTCAGCCTTGTACATACTTAGTGCAGACCCAATTTCCCCAATGTCCTTGGTCCCTGCTTGTGAATATGCAGATATTGGTTTGATGTGCAGACCTGGGACCTCTGGCACAAAAGGTTGCCTGAGATTGAGACCTGGGGAATAGGGAGCTGACAGGGTGGGGGTGGGGGCACTTAGCTCAGACTTGGAAGAGGGCTGAGTTCTCCAGAGACCCCCTCATGGTCCCAGACCGCTAAGTTCAGAGAGAAAGGTGACCTCACATTTTTAATAATTTCTGGCATGGAGCTGATTCCCTAGGGCCCGT…
chr17	31724370	31724371	112.5	18	B6xCAST	TCCAGAGTGGCTTGGCTCCCCACTCAGGCCTGTGGAATACCCTTCGATGCTCAGAAACTTGGTTTTGCTGGCCATCGGGTGAGTAGACATCAGGACACTTGGGTGGGAGAGACAGGGCAGAAAGTGCTATCCCAAGAACCTGGCCAAGAACAGGGTTGAAATTGGGCTTTGGTGGAGAATAGGCCATCTCCTCTGTCAGAACCAATCAGCTATCAGCACGGGCCGGCATGGAGGTTATACGCATTTACAGGTACGTTGTCTGTGAGGGTGGCTTCATTCTTTATGTGTGAGTGATGCAGAGGGGTCAGCTCATTATGCTACTGAGGCACGTTATAGCTCACTGTTCTGAGGGGTGGGGTGGGACGGGGCAGGGCAGTCACATGTTAGGGTCACAGGGGA…	AGTGGCTTGGCTCCCCACTCAGGCCTGTGGAATACCCTTCGATGCTCAGAAACTTGGTTTTGCTGGCCATCGGGTGAGTAGACATCAGGACACTTGGGTGGGAGAGACAGGGCAGAAAGTGTTATCCCAAGAACCTGGCCAAGAACAGGGTTGAAATTGGGCTTTGGTGGAGAATAGGCCATCTCCTCTGTCAGAACCAATCAGCTATCAGCACGGGCCGGCATGGAGGTTATACGCATTTACAGGTACGTTGTCTGTGAGGGTGGCTTCATTCTTCATGTGTGAGTGATGCAGAGGGGTCAGCTCACTATGCTACTGAGGGACGTTATAGCTCACTGTTCTGAGGGGTGGGGTGGGACGGGGCAGGGCAGTCACATGTTAGGGTCACAGGGGAAGCAG…
chr17	44014897	44014898	419	68	B6xCAST	CTGTTGAGTCACAGAAGGCATAGTACACTGGAAGTAGGTGGAAAATTAAAAGTGAGATGATTTGCAAACCTGCAAAGCAATGACAGTCTTCTGACCATATATTGCCATTTTTTCAGAGAACAGAAATTTCCTCTCATCAGGTTATGATATACAAAAGACCTATTACTGTTGCTTTGCAATACAGATATAAGTAAAGACTTTTCCAACTTCTGTCTTATGTCTGGTATGATCACTATTAAGAGTGAAAATCTAACACTAAAAAAGGCTCACTCTTTTGGCTCTCTAGCAATTTCTGGGAGTTCAGCATCCTAAGACCAAAACCTGCTGACCGCCATGATGGAACAGCATAGAGGCTACAGGGAGATTTTATAGCCAAGTCTGGGGGCTTCCACAGTGAAG…	TACTTCTACACACTGTTGAGTCACAGAAGGCATAGTACACTGGAAGTAGGTGGAAAATTAAAAGTGAGATGATTTGCAAACCTGCAAGGCAACGACAGTCTTCTGACCGTATATTGAGAACAGAAATTTCCCCTCATCAGGTTATGATATACGAAAGACCTATTACTGTTGCTTTGCAATGCAGATATAAGTAAAGACTTTTCCAACTTCTGTCTTATGTCTGGTATGATCAATATTAAGAGTGAAAATCTAACACTAAAAAAGGCTCACTCTTTTGGCTCTCTAGCAATTTCTGGGAGTTCAGCATCCTAAGACCAAAACCTGCTGACCGCCATGATGGAACAGCATAGAGGCTACAGGGAGATCTTATAGCCAAGTCTGGGGGCTTCCACAGTGAAG…
chr17	52692189	52692190	276.5	51.5	B6xCAST	TGATCTACTAGCAGGTCCTATGTCTACCTTTAATGTTGCTACAGCTTCACAAATAGCACTAGCTGGAGACTGGGAGGTCGAAACATTAGATGGAGGACATTGTGGATTCAAATGATAACATTCTGATCATCAACCCACAAAAGCCTACCGCCACTGAATAAAAAAAAGTATACTTAGTCTAACTTCAGAGGTACCTATCTATCGTTTAATATTTCCAATGCTATTCCAAGGTTCAGAGTTTTTTACTGAGACTCAAGGTAATCTCTCTGTTGTAATTCTATAAAATAAAATAAAATAAAATAAAATAAAATAAAATAAAATAAAATACAATGCCAAACACACCCAAGCAATAAAGTCAAACTAAAGCCCAGTAATGTGCATGGCTCCAACAGGCAATTG…	CCCATGCCATGATCTACTAGCAGGTCCTATGTCTACCTTTAATGTTGCTACAGCTTCACAAATAGCACTAGCTGGAGACTGGGAGGTCGAAACATTAGATGGAGGACATTGTGGATTCAAATGATAACATTCTGATCATCAACCCACAAAAGCCTACCGCCACTGAATAAAGAAAAGTATACTTAGTCTAACTTCAGAGGTACCTATCGTTTAATATTTCCAATGCTATTCCAAGGTTCAGAGTTTTTTACTGAGACTCAAGGTAATCTCTCTGTTGTAATTCTATAAAATAAAATAAAATAAAATAAAATAAAATAAAATAAAATACAATGCCAAACACACCCAAGCAATAAAGTCAAACTAAAGCCCAGTAATGTGCATAGCTCCAATATGCAATTG…
chr17	86162104	86162105	315.5	45.5	B6xCAST	CCTACCGTGTTACCCTCTGACCCTTCATGTCAAACCATGTGTTGTCTCTATATCAATCCTTTGTGCCCCTGACTTGTGTGTGTGTGTGTGTGTGGGGGGGGTCTGCTGCATTCTTGAATCAGATGTGTAGGGTTAGTATCAGGATTCAGAATTCTCCAAGGACAATGGCCCATAGCACCTTTGTCCTTCCTAAGCTTAGCTGTCTCTTCCAAACACCCACTCCGAGATAAGCAAAAACCTTTCCCTTTTCTCCCTCGCTGGCCCCTGTCCTGAAACACTTTGCGGGTGCTTGGCACGAGATAACAGAGCCTCTGGAATCCCCCTTAGACTCTATTCCAGTCCGTTCAGCACCGTCTTGGACTGTGGTGAACTGGGGGACTCAGTGCATCTAGAGAGATG…	GCCCCCACCTACCGTGTTACCCTCTGACCCTTCATGTCAAACCATGTGTTGTCTCTATATCAATCCTTTGTGCCCCTGACTTGTGTGTGTGTGTGTGTGTGTCTGCTGCATTCTTGTATCAGATGTGTAGGGTTAGTATCAGGATTCAGAATTCTCCAAGGACAATGGCCCATAGCACCTTTGTCCTTCCTAAGCTTAGCTGTCTCTTCTAAACACCCACTCCGAGATAAGCAAAAACCTTTCCCTTTTCTCCCTCGCTGGCCCCTGTCCTGAAACACTTTGCGGGTGCTTGGCACGAGATAACAGAGCCTCTGGAATCCCCCTTAGACTCTATTCCAGTCCGTTCAGCACCGTCTTGGACTGTGGTGAACTGGGGGACTCAGTGCATCTAGAGAGATG…
chr17	87699626	87699627	86.5	14.5	B6xCAST	TTTGTCCACTGGGTCTACTCTGCATACTTCCTGCCAGACGCCCGAACCTACCCGGGAATGAGAGTGGAACCCCGTGTAATGTACAGGTCAGAGGTCAGAGGCCTGGCAAAGGTAGTGGAACTCTTTACTCTAGATGGATAGGTTGGCAGGGAAGGAGCCTCACCACCTTTCAGTCTGGGTGAGGTGGTGTAGGGAGAAAGGAACGGGAATTGGAGCAAGTCCCTCAGCCCTTGCCACCTCTTGGAGTGGGCAGAGGAGGGCGGAGTCTGCCAGAGTGCTGTAAGCAGCCACAGGGGAGGAGAATTCAGGCGGGGCAGACTAGGGTGTGGGTTTCGGGGTCATAGAAGGGGAGGGGGCAGAGTCGGCACGGAGGAGGGAAGAGGATGGGGAGAAGGTTGA…	TTGTCCACTGGGTCTACTCTGCATACTTCCTGCCAGCCGCCCGAACCTACCCGGGAGTGAGAGTGGAACCCCGTGTAACGTACAGATCAGAGGTCAGAGGCCTGGCAAAGGTAGTGGAACTCTTTACTCTAGATGGATAGGTTGGCAGGGAAGGAGCCTCACCACCTTTCAGTCTGGGTGAGGTGGTGTAGGGAGAAAGGAACGGGAATTGGAGCAAGTCCCTCAGCCCTTGCCACCTCTTGGAGTGGGCAGAGGAGGGCGGAGGTCTGCCAGACTGCTGTAAGCAGCCACAGGGGAGGAGAATCCAGGCGGGGCAGACTAGGGTGTGGGTTTCGGGGTCATAGAAGGGGAGGGGGCAGAGTCGGCACGGAGGAGGGAAGAGGATGGGGAGAAGGTTGA…
chr18	7582714	7582715	212	6.5	B6xCAST	AGAAATGAGATTTTAAAAAAAAGAGGGGAGGAGGAGAGGGGAGATAAGGAAGGGGGGGCAGGGCATGGAGAGGAACTCTTCCTGACTTCACAGCATTAAGAGCAAAACCAGCTTCAAGAGTTGGCTTAATAAGAAAATGAAAAAAGGAATATGACCACTGTTTCAATCCCACGGAAACCTGGAGACGCACCGCGGAGAAACATTCGCTGATACTTCCTTCCACTTCCCAGGCCTACAAGATGATGCGTAATGAAAACTCAGCTTAAGTTTCACCATCATGCAAAGTGACTATTCAAATAGCCTGCCAGCTCCTAAGAGGAGACGCTGTTCTATGCATATGGTTGCCTCCTTAAAGCAGCAGTGTGATATTACAGTTCTACTATCTCCCACACCCAAGAA…	AAAGAGGGGAGGAGGAGAGGGGAGATAAGGAAGGGGGGGGGCAGGGCATGGAGAGGAACTCTTCCTGACTTCACAGCATTAAGAGCAAAACCAGCTTCAAGAGTTGGCTTAATAAGAAAATGAAAAAAGGAATATGACTACTGTTTTCAATCCCACGGAAACCTGGAGACGCACCGCGGAGAAACATTCGCTGATACTTCCTTCCACTTCCCAGGTCTACGCGATGATGCATAATGAAAACTCAGCTTAAGTTTCACCATCATGCAAAGTGACTATTCAAATAGCCTGCCAGCTCCTAAGAGGAGACGCTGTTCTATGCATATGGTGTTCTATGCATATGGTTGCCTCCTTAAAGCAGCAGTGTGATATTACAGTTCTACTATCTCCCACACCCAAGAA…
chr18	7612793	7612794	234	21	B6xCAST	CACTCTTTCTGTGCCTCCCATAGCAATGTGTTGTCTTGCCTCTATGAAATGTATGTTGACCTACTCAGAAACTTGTCATAGTAAAGAAAAGCTGACCACACTTGCCAAGGTTCATGAGACCAGTGATCCATGAGACTTGGAATAGAAACCCTAGTATACATGGTTAGTTTTACAGTCCACATTGTTCATCACTGAAGCATGTAGCCTTAAGGTAATCAATTGGAGGCTAGGACAGTAGACACTGATCCACTAGGAAGAGCTATGGCAGCAGACCTACAGAACACAGGAGGGCTGCAAATAGAGTTTCTGAGAAAAATATCAAGTTGTCTTTCTCCTCAGAGTGAAGTATCTGGCCTGAATGAAGCTATGTTCTTTTCAGCAGAAGGGCAAGTTCCTGTG…	CACTCTTTCTGTGCCTCCCATAGCAATGTGTTGTCTTGCCTCTATGAAATGTATGTTGACCTACTCAGAAACTTGTCATAGTAAAGAAAAGCTGACCACACTTGCCAAGGTTCATGAGACCAGTGATCCATGAGACTTGGAATAGAAACCCTAGTATACATGGTTAGTTTTACAGTCCACATTGTTCATCACTGAAGCATGTAGCCTTAAGGTAATCAATTGGAGGCTAGGACAGTAGACACTGAACCACTAGGAAGAGCTATGGCAGCAGACCTACAGAACACAGGAGGGCTGCAAATAGAGTTTCTGAGAAAAATATGAAGTTGTCTTTCTCCTCAGAGTGAAGTATCTGGCCTGAATGAAGCTATGTTCTTTTCAGCAGAAGGGCAAGTTCCTGTG…
chr18	7735398	7735399	182.5	9	B6xCAST	ATGGACTAGGATCTCCTGCCCAGGATGGTACTGTCCAGTGTGCTAGACCCTCCCATATCAATAAACAATTAATATGAAAAATACAAGCATGGACCAATCTGATCTGGGAAATTCTGCTTTCAAGGTTTCTCCAATTAGACAAGTCTAGGAGTGTTAGTTAACCTGACAGTTAAGGCTAATCAGGACAATTACTTCATGTGACAAAATTAAGTAGGGCTTTCTCCATGGTGAAATCAAGATGAGTGGGGTAAGCTAGATCTGTCAGAGAAGTGCATCCATGAACTCTGAGCAAATCTGTTGCAGCAAGAGCCTCAAATAGACAGTTCATACTGCAGGAAATCCAGATCAGATGCTGAACTAAGCACCCAGAAATCATCACAGACACACTAAAAGGGGACA…	TGGACTAGGATCTCCTGCCCAGGATGGTACTGTCCAGTGTGCATAGACCCTCCCATATCAATAAACAATTAATATGAAAAATACAAGCATGGACCAATCTGATCTGGGAAATTCTGCTTTCAAGGTTTCTCCAATTAGACAAGTCTAGGAGTGTTAGTTAACCTGACAGTTAAGGCTAATCAGGACAATTACTTCATGTGACAAAATTAAGTAGGGCTTTCTCCATGGTGAAATCAAGATGAGTGGGGTAAGCTAGATCTGTCAGAGAAGTGCATCCATGAACTCTGAGCAAATCTGTTGCAGCAAGAGCCTCAAATAGACAGTTTATACTGCAGGAAATCCAGATCAGATGCTGAACTAAGCACCCAGAAATCATCACAGACACACTAAAAGGGGACA…
chr18	7739099	7739100	54.5	9.5	B6xCAST	CAAATCTGAGCTCTCAGCTACTGCTTTAGCACCCTGCCTGTCTGCCACCTTTCTTCCCATCATGATGCTCATGGACTAACCCTCTGAAACTGTAAGCAAGCACCCAATTAAATGCTTCCTTCTATAAGTTGCCTTGGTCATGGTGTTTCTTCACAGTAATAGAACAGTAACTAAGATGGTACCTAATATTTTTTAACCAAAGTCCTTAAAATTTCATGAATGGAAAAATGATAGACAGCTAGAATCTGTTCCCATAGACATTATCTGTGAAATCTGAGAATAGCCAAGTTTGTGACTTTGATTTTCAAAACTGTGTCAGTAATATGTAAAGAAAGGAAGCAAGCATAGAAGTGTATCCAATTTCAGATGATGATTAGAACGGACACCAGGTTTCCCAGC…	CAAATCTGAGCTCTCAGCTACTGCTTTAGCACCCTGCCTGTCTGCCACCTTTCTTCCCATCATGATGCTCATGGACTAACCCTCTGAAACTGTAAGCAAGCACCCAATTAAATGCTTCCTTCTATAAGTTGCCTTGGTCATGGTGTTTCTTCACAGTAATAGAACAGTAACTAAGATGGTACCTAATATTTTTTAACCAAAGTCCTTAAAACCTCATGAATGGAAAAATGATAGACAGCTAGAATCTGTTCCCATAGACATTATCTGTGAAATCTGAGAATAGCCAAGTTTGTGACTTTGATTTTCAAAACTGTGTCAGTAATATGTAAAGAAAGGAAGCAAGCATAGAAGTGTATCCAATTTCAGATGATGATTAGAACGGACACCAGGTTTCCCAGC…
chr18	8957803	8957804	266.5	47	B6xCAST	GAACTCCCAAGTTCCATGGCCAGAAAATCCTGACAAGCTTCTGATAGCTGAATAATGGATGAAGCTCTGCTGTTTACTTAGCAAGGGGAGGAAAAAAAAGTGTGATAGAGAGTTCTAGATATGGAGCAGGAATCTGACACCCTCCAAGGTGAACAATGGTGGGAAGAATAGGCTGCCTTCTCACTCCTTTTTTTATTTTTGTCCATGCACAAAAAGTGTGTGAAAATAGCAGCTCAGTGTTTCATCCTTATCCAGGTCTCCTGTGCCCCTCAGAACAGGACAAGACCTGACCTCCAAATATCAACTATTTCCAACCCCACACAGTCTATGTTACAGCAGGCGTTCAGAACATAGGACAACTTTTTCCCAGCTAGGACACACCACCGATATTTTCACATA…	GAACTCCCAAGTTCCATGGCCAGAAAATCCTGACAAGCTTCTGATAGCTGAATAATGGATGAAGCTCTGCTGTTTACTTAGCAAGGGGAGGAAAAAAAAGTGTGATAGAGAGTTCTAGATATGGAGCAGGAATCTGACACCCTCCAAGGTGAACAATGGTGGGAAGAATAGGCTGCCTTCTCACTCCTTTTTTTATTTTTGTCCATGCACAAAAAGTGTGTGGAAATAGCAGCTCAGTGTTTCATCCTTCTCCAGGTCTCCTGTGCCCCTCAGAACAGGACAAGACCTGACCTCCAAATATCAACTATTTCCAACCCCACACAGTCTATGTTACAGCAGGCGTTCAGAACATAGGACAACTTTTTCCCAGCTAGGACACACCACCGATATTTTCACATA…
chr18	12608657	12608658	52	7.5	B6xCAST	CTGGAAAGAAACTTCTAGTTCGGTACCAGCTAGATTTCTCTGTGTCCTGTGACCACAGTGTGTGGTATCTTTGGGACTTAAGCATCACCAGTGGATGGTATGTTTTAAGTCAGAATTAAAGTTAGCTCAGCATAGACAGCTGGCTAAATCAGCATGCTTATAACAGATAATTACTCCAAAAACTTCATTTGGAAACAGTAATTAATTACCAAAATAACTTTATTCAGCCTGCTTCCCCTCGGTTCCACCTTACACACGGGACCATGAGTTTCCTGGAGGAGTTTAGTCCTGACACTTTGTTAGAGAGAAGCAGCTAGCATTTCACTGAGCTTACAGCTTCAGCTCTGATCCTCCAGCTCAAATCCCTTCTTGTTTGAAGTGACTTCTGACAAGAGCAGA…	CTGGAAAGAAACTTCTAGTTCGGTACCAGCTAGATTTCTCTGTGTCCTGTGACCACAGTGTGTGGTATCTTTGGGACTTAAGCATCACCAGTGGATGGTATGTTTTAAGTCAGAATTAAAGTTAGCTCAGCATAGACAGCTGGCTAAATCAGCATGCTTATAACAGATAATTACTCCAAAAACTTCATTTGGAAACAGTAATTAATTACCAAAATAACTTTATTCAGCCTGCTTCCCCTCAGTTCCACCTTACACACGGGACCGTGAGTTTCCTGGAGGAGTTTAGTCCTGACACTTTGTTAGAGAGAAGCAGCTAGCATTTCACTGAGCTTACAGCTTCAGCTCTGATCCTCCAGCTCAAATCCCTTCTTGTTTGAAGTGACTTCTGACAAGAGCAGA…
chr18	24320238	24320239	168.5	3	B6xCAST	CCCTTGTAGCAGTGTAGGGGTGGTTCTGATGCTAAGATCCTGTTCCCTGACTGATTCTTGATCTGTCAGTAAAGATGCCATGGACCAATTGCTGGGTGGAAGGAGTAGGCAGAACTTCTCGGCTTCCACAGGCAAGCTAACAGAGATGCTTTGGAGGGACAAAAGGTGACCAGCTATGTGAGACCTTTGGCTGCTTCTCCAGGCAGGAGGTTGGGGATGTTGAACTGGGACTGAATGTAACTGAGCAACTAAAGTTTGGGACAGATTTAGGGTACTCAGCTAAGAATATTGGGGAGGGCACACTAGCCATGGGAAAATAATAATGCCCAGCAATTGAGCCAATAAGGCAAATTGAAATAGAATAGCTGTATGTCTGTTTCATCATCCTTCAATACTCTC…	CCCTTGTAGCAGTGTAGGGGTGGTTCTGATGCTAAGATCCTGTTCCCTGACTGATTCTTGATCTGTCAGTAAAGATGCCATGGACCAATTGCTGGGTGGAAGGAGTAGGCAGAACTTCTCGGCTTCCACAGGCAAGCTAACAGAGATGCTTTGGAGGGACAAAAGGTGACCAGCTATGTGAGACCTTTGGCTGCTTCTCCAGGCAGGAGGTTGGGGATGTTGAACTGGGACTGAATGTAACTGAGCAACTAAAGTTTGGGACAGATTTAGGGTACTCAGCTAAGAATATTGGGGAGGGCACACTAGCCATGGGAAAATAATAATGCCCAGCAATTGAGCCAATAAGGCAAATTGAAATAGAATAGCTGTATGTCTGTTTCATCATCCTTCAATACTCTC…
chr18	24996194	24996195	141	26	B6xCAST	GCTTTGCTGACTCCCCATTTCATGGTCTGCCTACGGGTAGGCTTTTGCATGGCCCCAGTCTCCATCGGTGCCTTTGGAAGTTCAACCATACTCAACTTCCTGTTGAAACTGGGAAACTGGGTCATTTGAGGAGCCTTTACCTTCCTTTCCTTCCCTCTGCCTTCTTTTTCTCTATTCACCCACTGGCAATCTCTCTGAAGTGTCATCTCCATGAAGCCTTGTTGGCAAGGGGCTTTTGTTACTTGTTCCCAGTCCTCCACTGTTCAAAAGCAAATGTTTCTGGTATCCATGCCTCTGTCTAAAAGTTCTCATGACAATCCTGTCTGTCTGTCACTTTGAGCAACCGAAATCCTATGTTCCATGCCTCGTTTGAATGCAAGGGCCCAACACAGCTAAAGT…	GCTTTGCTGACTCCCCATTTCATGGTCTGCCTACGGGTAGGCTTTTGCATGGCCCCAGTCTCCATCGGTGCCTTTGGAGGTTCAACCATACTCAACTTCCTGTTGAAACTGGGAAACTGGGTCATTTGAGGAGCCTTTACCTTCCTTTCCTTCCCTCTGCCTTCTTTTTCTCTATTCACCCACTGGCAATCTCTCTGAAGTGTCATCTCCATGAAGCCTTGTTGGCAAGGGGCTTTTGTTACTTGTTCCCAGTCCTCCACTGTTCAAAAGCAAATGTTTCTGGTATCCATGCCTCTGTCTAAAAGTTCTCATGACAATCCTGTCTGTCTGTCACTTTGAGCAACCGAAATCCTATGTTCCATGCCTCGTTTGAATGCAAGGGCCCAACACAGCTAAAGT…
chr18	25019097	25019098	255	9	B6xCAST	TCCTTTGTCTGGTACGAGGCCTCTGGCTTTTGCTACTCTATCAATATGGGGATCTCACTGCGACTCCTCTCAGATACCCTGTTGTTGTCATGTGTCATGGAGTTCCTGTAGTTTTGGATCTGTAGGACTGGGATGGGCTAGACCACAAGTCCCATCTCCAGCAAACTGTTGATCAAGCTGAGGGAAGATGACCTCTCGCTAGTGATTGTGGACAGTGAGCTTGGTGCTGTAGGAGCAAGGGAAGGAGAACAGAACCGCTGGTGAGAGGTGGTGTGTGAGTACAGGCCGTGCTAGTGTGGTGGAGCAGGGCCAATGGGCTGAGCTTGCCTGGGCCTTTGGCACTGAAAGAAGGCTGTGCCCTGATGTCCACTGGTCTCTGACAGAGGCACCCAACACAGG…	GTCCTTTGACTAGTATGAGGCCTCTGGCTTTTGCTACTCTATCAATATGGGAATCTCACTGGGACTCCTCTCAGATACCCTGTTGTCCTGTGTCATGGAGTTCCTGTAGTTTTGGATCTGTAGGACTGGGATGGGCTAGACCACAAGTCCCATCTCCAGCAAACTGTTGATCAAGCTGAGGGAAGATGACCTCTCGCTAGTGATTGTGGACAGTGAGCTTGGTGCTGTAGGAGCAAGGGAAGGAGAACAGAACCGCTGGTGAGAGGTGGTGTGTGAGTACAGGCTGGGCTAGTGTGGTGGGGCAGGGCCAATGGGCTGAGCTTGCCTGGGCCTTTGGCACTGCAAGAAGGCTGCTGCCCTGATGTCCACTGGTCTCTGACAGAGGCACCCAACACAGGC…
chr18	25035263	25035264	131	21	B6xCAST	ATATGATGTAGTGGGGGTGCTTCTTAGAACATGTCATTTTATACATGTGTGATTATCTGAAGGAGATCCTAATATAATTCCTAAAAATGGACTTAGTATATCAAAATAGCGATACAGTCTCAACACTTCAGAAGGTAGAGAGGCAGGGGGATTTTGAATTAAAGATCATCCTTAGCTACATAGTAAATTTGAGGCCATCTTGGGGTATGCGAGATCCTGTCTCAAAAAAAGATTATACTTTTTAAATGTTGATGATTTTTTGTTAAAGTATGATCCATAAAGACCATCAATTTTGATTTCCAATATACTGGTGAAAGTCTAGTTTCTCATATCTTTGTCAAGAGGTAGTAAATCTCTGCTTGTGTAGTGGTGCATCAGCTAATTTGTGACTTGCATTTC…	TATGATGTAGTGGGGGGTGCTTCTTAGAACATGTCATTTTGTACATGTGTGATTATCTGAAGGAGATCCTAATATAATTCCTAAAAATGGACTTAGTATATCAAAATAGTGATATAGTCTCAGCACTTCAGGAGGTAGAGAGGCAGGAGGATTTTGAATTAAAGATCATCCTTAGCTACATAGTGAATTTGAGGCCATCTTGGGGTACGTGAGATCCTGTCTCAAAAAAAGATTATACTTTTTAAATTTTGATGATTTTTTGTTAAAGTATGATCCATAAAGACCATCAATTTTGATTTCCAATATACTGGTGAAAGTCTAGTTTCTCATATCTTTGTCAAGAGGTAGTAAATCTCTGCTTGTGTAGTGGTGCATCAGCTAATTTGTGACTTGCATTTC…
chr18	26094629	26094630	218	19	B6xCAST	GACAATGGTAGGATAAAACTCTTTATGTGTTCAGGAGAGCTGGGGCAAGATTTAATAGACAGGTGGCAGGCAGAGCTGAGAGATATAGATTTCTGTATAATATGCACTGCTAAATTTTGTATACTTGATATGTTGGCCTCTGTATTTGCTCCAAATGTTCTGTCATGCACAGTTACTGAGTAGACAACTTTGTGTAATGATAACAGCAACTATGCCTAATGCTGACTCTAATATTGGTCCTAAGTCAGCATTGTGAACTGATGCCTCCAGCCCACATTACAGAGGTGGTCATGGATCTCATGTGAGAGTAAGCTGATATATTTTGTGCATTCCAAGTCTCAGTGTAGCAGAAAGTAGGTTTTCAGCAAGCTGGTGCCATTGTCAACAAAGGCTTAATGC…	GACAATGGTAGGATAAAACTCTTTATGTGTTCAGGAGAGCTGGGGCAAGATTTAATAGACAGGTGGCAGGCAGAGCTGAGAGATATAGATTTCTGTATAATATGCACTGCTAAATTTTGTATACTTGATATGTTGGCCTCTGTATTTGCTCCAAATGTTCTGTCATGCACAGTTACTGAGTAGACAACTTTGTGTAATGATAACAGCAACTATGCCTAATGCTGACTCTAATATTGGTCCTAAGTCAGCATTGTGAACTGATGCCTCCAGCCCACATTACAGAGGTGGTCATGGATCTCATGTGAGAGTAAGCTGATATATTTTGTGCATTCCAAGTCTCAGTGTAGCAGAAAGTAGGTTTTCAGCAAGCTGGTGCCATTGTCAACAAAGGCTTAATGC…
chr18	29593237	29593238	344.5	39	B6xCAST	TAAAGTAAGGATTTCAAAATAATAGTGAGTCGGGCAAGCCATGATTCTGGCTACACTGACTTAAGTGAATGCTGAAATTTTATGGAGAAGATTTCTCACCTTTGGTAGATGATGGCATGTGTTTGTATCAAAAGGGGCGAAAATTTCCCTCTGTTGGCTCTGACCTCTGTGTATTGTCCTCAGAACTACTTTAATATCATACTCTATAGTTTTTCATCATATCCTGAGCTCTGAATTGTCCTTCATTTAGGACCGGGAGTCTAGATTCTAGTTACAAGTCTGTGAGCACACTGAAGCTGTGGAATGACAGAGACTCCTGATAGTGTGCCAGTTATGGTAAGTTAAGAATACTGAGAGGAAGACTGGTATGTCCTTCACAGATGACTAGCAACACTTCAA…	TAAAGTAAGGATTTCAAAATAATAGTGAGTCGGGCAAGCCATGATTCTGGCTACACTTACTTAAGTGAATGCTGAAATTTTATGGAGAAGATTTCTCACCTTTGGTAGATGATGGCATGTGTTTGTATCAGAAGGGGCGAAAATTTCCCTCTGTTGGCTCTGACCTCTGTGTATTGTCCTCAGAACTACTTTAATATCATACTCTATAGTTTTTCATCATATCCTGAGCTCTGAATTGTCCTTCATTTAGGACCAGGAGTCTAGATTCTAGTTACAAGTCTGTGAGCACACTGAAGCTGTGGAATGACAGAGACTCCTGATAGTGTGCCAGTTATGGTAAGTTAGAATACTGAGAGGAAGACTGGTATGTCCTTCACAGATGACTAGCAACACTTCAAA…
chr18	35117514	35117515	184	31.5	B6xCAST	GCCTGCCTGTATGCATAAATGCCATGGTGCTTACGTAGAGGTCAGAAGACAACCTTTGGGAGTTCTGTCCTTTCTCCATGTGGGTCCTTGGGATTGAACTCAGGTCAAATGGGTTGGGCAAGAGCTTGTATCCACTGAGTCATCCCCTAGCCTAACAGGGTTTCTCTGTGTAGCCTTGGTTATCCTGGAACTCACTCTGTAGCGGACTAGGCTGTCCTCAAACTCGGAAAGTCCTCTCATTCTCCAGGGCAGGTTCTCTCTCTCTCTCTTTCTCTCTCTCTCTCTCTCTGCTTTCTCTCTCTTTCTCAAAAAGTTTCGAGCCAATAGACTGTTTTATTACTACTTCAAGCAAACAAATAAAGAACACCACCTCCCCACCCAACCTCCCCTTCTGAGAAA…	GCGCGCCTGCCTGCCTGCATAAATGCCATGGTGCTTACGTAGAGGTCAGAAGACAACCTTTGGGAGTTCTGTCCTTTCTCCACGTGGGTCCTTGGGATTGAACTCAGGTCAAATGGGTTGGGCAAGAGCTTGTATCCACTGAGTCATCCCCTAGCCTAACAGGGTTTCTCTGTGTAGCCTTGGTTATCCTGGAACTCACTCTGTAGCGGACTAGGCTGTCCTCAAACTCGGAAAGTCCACTGACTCTCCAGGGCAGGTCCTCTCTCTCTCTCTTTCTCTCTCTCTCTCTCTCTGCTTTCTCTCTCTTTCTCAAAAAGTTTCGAGCCAATAGACTGTTTTATTACTACTTCAAGCAAACAAAGAACACCACCTCCCCACCCAACCTCCCCTTCTGAGAAA…
chr18	38098285	38098286	143.5	19.5	B6xCAST	TGAGGGTGGAAGCCAGCAAGCTGTGTTTAACAAGCCCTCCAGGTGATTCTGATGCGAGATGAAATTTAAGAACCACTGAACTATAACACTCTTTCCCACGCAGTCCCTTCACACGGCCCCCTAGGCAGTCACTACTAACCCAGCTAACTGCATAGAGCCCTGAGCTGGGGAAGCTCAGATGGGGGCGGCCGCAGAGAGCACAAGACGCTGAGGCCCTGACAAGCCAGCGAATGGGCCAGGAGCAGACCTCAAGTTACCGCTGAGTATTGCCCAACCTCAGAGCTTCTACTCCCTCAGAGCCTCAGTTTCCTCCTCTGGGCATTGAAGAAAGCGTCACTGAGTGGGACTACGTCTGCAGCTTCTGAGCCTGAGCGAAGCGGACGCCTGATTGCCCTCCCC…	TGAGGGTGGAAGCCAGCAAGCTGTGTTTAACAAGCCCTCCAGGTGATTCTGATGCGAGATGAAATTTAAGAACCACTGAACTATAACACTCTTTCCCACGCAGTCCCTTCACACGGCCCCCTAGGCAGTCACTACTAACCCAGCTAACTGCATAGAGCCCTGAGCTGGGGAAGCTCAGATGGGGGCAGCCGCAGAGAGCACAAGACGCTGAGGCCCTGACAAGCCAGCGAATGGGCCAGGAGCAGACCTCAAGTTACCGCTGAGTATTGCCCAACCTCAGAGCTTCTACTCCCTCGGAGCCTCAGTTTCCTCCTCTGGGCATTGAAGAAAGCGTCACTGAGTGGGACTACGTCTGCAGCTTCTGAGCCTGAGCGAAGCGGACGCCTGATTGCCCTCCCC…
chr18	43334748	43334749	203	19	B6xCAST	AGTCACTAGTTATAAGCTCTGACTGTAAGCCTCACACTTTGAGGCAATTTTATGTTTGACAGGAAGAAAATAAAACTATGTACTGATTATGTGATTACAGGACACATTAAAATGTCAAAGCATTATGACCTAGAACTGATGGCATTGTTTACACTCCCAAACTTCTGAAAGGACTTAACATACATGACAGGTCTGGCCCACGGTAGAAACTCAATAAATACTAATTTTGTGTGTGTGTGTGTGCAAATCATTTGGGAATGTACTTATACATGTGTGTGCATGGGTCTAGAGGCCAGAGGCCAACATTGGATGCCTTCTCTGTCCTCCATTTTACTATTTGGGGCAGTCTCTCACTGAACTGGCAGCTCACTGACTAGACAAGGTAAGCTTGCTAGTAAG…	AGTCACTAGTTATAAGCTCTGACTGTAAGCCTCACACTTTGAGGCAATTTTATGTTTGACACGAAGAAAATAAAACTATTTACTGATTATGTGATTACAGGACACATTAAAATGCCAAAGCATTATGACGTAGAACTGATGGTATTGTTTACACTCCCAAACTTCTGAAAGGACTTAACATACATGACAGGTCTGGCCCATGGTAGATACTCAATAAATACTAATTTTGTGTGTGTGTGTGTGCAAATCATTTGGGAATGTACTTATACATGTGTGTTCATGGGTCTAGAGGCCAGAGGCCAACATTGGATGCCTTCTCTGTCCTCCATTTTACTATTTGGGGCAGTCTCTCACTGAACTGGCAGCTCACTGACTAGACAAGGTAAGCTTGCTAGTAAG…
chr18	47562750	47562751	140.5	8	B6xCAST	TTTCACTTCGATATGTTTTGTATGCTAATGTTTTTGTTTTTTAAGAGAGAAAAAGAAAACATTAAATTGAGTGGTTAAGGAGGAGAGAGGATCTGAGGAGTTGGGGAAAGGAAAACATAATCAAAATACACTGCATGAAAAAAATTAGATTAAAAAATGTAAAAGTTGCTGTAACTCAGCTAATTTTAGGTTAAGGTAATACAAGTCAGTGAACATGGAGAACAGGGTCTAAGTTCTCAGGTTGCATCGCTTTGGGGGGAATTTACTTAACCTTCTAATGGCTTGGTTCAAAACCAAGCCAACAACAAATGAAACAACACCCCACACCTGAAACATAGGAAATAATAGAAAAATAAACTACATTCTGTGGTGAACAAATCATAGAATTAACTAAAGTCG…	CTTTTTTTCACTTCGTTTTGTATGCTAATGTTTTTGTTTTTTAAGAGAGAAAAAGAAAACATTAAACTGAGTGGTTAAGGAGGAGAGAGGATCTGAGGAGTTGGGGGAAGGAAAACATAATCAAAATACACTGCATGAAAAAAAATAGATTAAAAAATGTAAAAGTTGCTGTAACTCAGCTAATTTTAGGTTAAGGTAATACAAGTCAGTGAACATGGAGAACAGGGTCTAAGTTCTCAGGTTGCATCGATTTGGGGGGAATTTACTTAACCTTCTAATGGCTTGGTTCAAAACCAAACCAACAACAAATGAAACAACACCTCACACCTGAAACATAGGAAATAATAGAAAAATAAACTACATTCTGTGGTGAACAAATCATAGAATTAACTAAAGTCG…
chr18	52316106	52316107	360.5	22	B6xCAST	GCCCAGCAATCTCAGAGATTTTATAAGACTGTGAGTTGAAGACTCCCATGGTTATCAATAGTTCATTGGCCCTCGATATGTTCTTCCACCAGCAAGCTTTTAAGTAGGAATATGCTCTATCTTCTCCTGGAAAATAAAAAGCTTCAAAACTTGAGAGATGATTCAGCAGTTAAGAGTACTTTCTGTTCTTCCAGAGGACCTGGGACTTGATTTCCAGAACCTATGCCAGGCAGTTTACAAGCACTTGTAACTTTAGCTCTAGGGAATGCTTTCCTTTGACCTCTAGAGGTACCAAGACACAACCCACCCCATCTACCTATAGAGACACATAAAAATATCTCATTTCCTAGTTTTACAGAAATCTCTATCTAACTAGAGGTACAAAAAGATGCAATAAAG…	GCCCAGCAATCTCAGAGATTTTATAAGACTGTGAGTTGAAGACTCCCATGGTTATCAATAGTTCATTGGCCCTGGATATGTTCTTTCACCAGCAAGCTTTTAAGTAGGAATATGCTCTATCTTCTCCTGGAAAATAAAAAGCTTCAAAACTTGAGAGATGATTCAGCAGTTAAGAGTACTTTCTGTTCTTCCAGAGGACCTGGGACTTGATTTCTAGAACCTATGTCAGACAGTTCACACGCACTTGTAACTTTAGCTCTAGGGAATGCTTTCCTTTGACCTCTAAAGGTACCCAGACACAATCCACCCCATCTACCTATAGAGACACATAAAAATATCTCATTTCCTAGTTTTACAGAAATCTCTATCCAACTAGAGGTACAAAAGGATGCAATAAAG…
chr18	56370492	56370493	259.5	15	B6xCAST	TCCCTGTTATCATTAGGATACCCAGCCTCACTCACCTGACTCTGTGAAGCACGGACTCAAGCCCAGGCTTTCTCAACCTCGCTCTGTAGAACCATTCAGGAAGAATTAGGAGAGTGGACCAAGCTAGAAGAAACCGACAATCCCGCCCTGACTTAACCCGGAAAACTAAGCCTATCTGCTTACGGGGCTCACGGTTTGTAACACAAGTTCTGCCTCCACTACTTTTCTTCTTGAGTGGTTTGTTTGTTTGTTTGCTTTGGAAATTTTGTTTGCTTGGTTGTTTTGTTTTGTTGTCTTGTTTTGTTTTTTGGTGAGAAAATGCTTGGTAGAGCCAAGAAATCAAGCAGATGCCACATATACACAGCATCTGGGGTCTGGGTGGGGGAGGGAGGGAGGGAG…	TCCTTGTTATCATTAGGATACCCAGCCTCACTCACCTGACTCTGTGAAGCACGGACTCAAGCCCAGGCTTTCTCAACCTCGCTCTGTAGAACCATTCAGGAAGAATTAGGAGAGTGGACCAAGCTAGAAGAAACCGACAATCCCGCCCTGACTTAACCCGGAAAGCTAAGCCTATCTGCTTACAGGGCTCACGGTTTGTAACACAAGTTCTGCCTCCACTACTTTTCTTCCTGAGTGGTTTGTTTGTTTGTTTGCTTTGGAAATTTTGTTTGCTTGGTTGTTTTGTTTTGTTGTCTTGTTTTGTTTTTTGGTGAGAAAATGCTTGGTAGAGCCAAGAAATCAAGCAGATGCCACATATACACAGCATCTGGGGTCTGGGTGGGGGAGGGAGGGAGGGAG…
chr18	57270315	57270316	186.5	29	B6xCAST	TTTGTACCTGAACAGGAAAATTGAATACTAAACTGTCAGAAAGGGGGTAAATGTCACAGCAGCCCTTGATACCCTTGGGAAAGTGAGTGAGATCACACAATGTGGTAGGGTAGGGAGACAGGAATGCAGAATGGAATCAGAGGTGGGGCCCTCAGCCAGGAATGGGAGGCCTGAGAGGAGAACCCATGGGCTATCAATAACAAGAAATCAGCTTCTCCATGGCCCCCAGAAGCAGAACTAAGCAGCCTTTCTGTCCTACACACCACTGTGACCACCGAGGCAAATGAAAACTACCTTTGGGGTTCATCTATTCCTATGTAGCTCTCTGCCACCCTAAGACTCTCAGCGATGCCTATATAATTACCACAAGGGGCTTGAGACAGGGCAAGAGGAAGACAT…	AACAGGAAAATTGAATACTAAACTGTCAGAAAGGGGGTAAATGTCACAGCAGCCCTTGATACCCTTGGGAAAGTGAGTGAGATCACACAATGTGGTAGGGTAGGGAGACAGGAATGCAGAATGGAATCAGAGGTGGGGCCCTCACTTGAGCCCAGCCAGGAATGGGAGGCCTGAGAGGAGAACCCATGGGCTATCAATAACAAGAAATCAGCTTCTCCATGGCCCCCAGAAGCAGAACTAAGCAGCCTTTCTGTCCTACACACCACTGTGACCACCGAGGCAAATGAAAACTACCTTTGGGGTTCATCTATTCCTACGTAGCTCTCTGCCACCCTAAGACTCTCAGTGATGCCTATATAATTACCACAAGGGGCTTGAGACAGGGCAAGAGGAAGACAT…
chr18	72078224	72078225	159	6	B6xCAST	TTGTTGTTGTTGTTGTTATAACTTGAGCCAAGCCTTAGGGCACATAGAAACTGATAAAGTGAATAAGATGCTCCGTTAATCTGGCAGGCAGTCTATTAAACCTTGTGATGGGAAAGGGCCTAAAATAGTGAGCAAGCTAAGCTTCCTTTCATGCTTCATTGACAAACTGCACTTCTTATGCTTGTTACATTTTTATCATAAAAAAAAAAACCGCCGTTTACTTAACAGTGTTTTTTTTTCAAGTGAGATCATACGTAGTAAGAAAACAAGGAACAATAAAATCAAGCAAGGAAGTAACTTCCTCTCGAGATTGAATCAGAAGAACATCTTGAGAAAATTTTATATCTATAGGTGTGCTTTCAACACTTATCTGTGCTTTTGATTCCTGAGGATTTGGCT…	TTGTTGTTGTTGTTGTTGTTATACCTTGAGCCAAGCCTTAGGGCACATAGAAACTGATAAAGTGAATAAGATGCTCCGTTAATCTGGCAGGCAGTCTATTAAACCTTGTGATGGGAAAGGGCCTAAAATAGTGAGCAAGCTAAGCTTCCTTTCATGCTTCATTGACAAACTGCACTTCTTATGCTTGTTACATTTTTATCATAAAAAAAAACGCCGTTTACTTAACAGTGTTTTTTTTTCAAGTGAGATCATACGTAGTAAGAAAACAAGGGACAATAAAATCAAGCAAGGAAGTAACTTCCTCTCGAGATTGAATCAGAAGAACATCTTGAGAAAATTTTATATCTATAGGTGTGCTTTCAACACTTATCTGTGCTTTTGATTCCTGAGGATTTGGCT…
chr18	81319737	81319738	133.5	13	B6xCAST	GGGGGGTCCTGGCCCACTAGGGTTACATAGTGAGATGTAAAGCCTACATTCTTCCCAATGGTGGAGCAGAAAACCACAAGATCTCAAAACTCATAAGAGTTGTGAAATTTTACAAGTTACACTACCCAGAAAGCCAGCCGAAGGTTATGTAAACAGCAACAATTGCCAGGGGAAAGGAGAATCTCCGGTGGAGCTGCCTGAAAGCTACAGAGGGAAGGGACTTCAGCGATGAACCCTCCACACATCGCACCCATGCTGGAGTATAACTTTCCAAAAAACGTAGATGCCTGCACAGTCACACTCCTGTAAGTAACCACAATAAATCCACCAGTTGCCCAATCTAGAGTTGGATACATGTGTGTGCTTGTTCAGTCATAGGTACTTTATCTGGAGTAAAGA…	AGGAGGGGTCCTGGCCCACTAGGGTTACATAGTGAGATGTAAAGCCTACATTCTTCCCAATGGTGGAGCAGAAAACCAGAAGACCACAAAACTCATACGAGTTGTGAAATTTTACAAGTTACGTTACCCAGAAAGCCAGCCGAAGGTTATGTAAACAGCAACAATTGCCAGGGGAAAGGAGAATCTCCGGTGGAGCTGCCTGAAAGCTACAGAGGGAAGGGACTTCAGCGATGAACCCTCCACACATCGCACCCATGCTGGAGTATAACTTTCCAAAAAACGTAGATGCCTGCACAGTCACACTCCTGTAAGTAACCACAATAAATCCACCAGTTGCCCAATCTAGAGTTGGATACGTGTGTGCTTGTTCAGTCATAGGTACTTTATCTGGAGTAAAGA…
chr19	6136616	6136617	566	12	B6xCAST	TTCTAAACCAGCCACGAGGTTGGTGGTCAGCACACAGGGTCAGGAACAGAGCTCCAGGTTGTTGAGGCCCAGAAGGGTTAGGCAGTGGACGGGGCTATGATGCTATATCACAGTGGCCATCTCTCTCTTCCAAGCCTGTTTTCTCTTCCGTAGTCATCCCCCAGCCCTCTGTAACTCTGGCCGTGTGCAGAAAACATAAGTGTGCTGGAGGCTGCCCTGGGGACTCTGGGATATAACCACCTGCCCCTCCTAGTTCACAGAATCCTTAAATCTTACTTCCAGCCGCATTTACTGCCGCATTGCTGTCTCTCTCTACTTCTTCCCCTTGATGTGTTTGTCTTTGGAACCTCTCCTTGTGCACAGAGAAGTCCAGCTTCTGAGCCTAGGCCTGCTGGGCCC…	CATACGGCTTGATCCCTTCTAAACCAGCCACGAGGTTGGTGGTCAGCACACAGGGTCAGGAACAGAGCTCCAGGTTGTTGAGGCCCAGAAGGGTTAGGCAGTGGACGGGGCTATGATGCTATCACAGTGGCCATCTCTCTCTTCCAAGCCTGTTTTCTCTTCCATAGTCATCCCCGAGCCCTCTGTAACTCTGGTCGTGTGCAGAAAACATAAGAGTGCTGGAGGCTGCCCTGGGGACTCTGGGATATAACCACCTGCCCCTCCCAGTTCACAGAATCCTTAAATCTTACTTCCAGCAGACTGCCGCATTGCTGTCTCTCTCTACTTGGTGTGTTTGTCTTTGGAACCTCTCCTTGTGCACAGAGAAGTCCAGCTTCTGAGCCTAGGCCTGCTGGGCCC…
chr19	18608339	18608340	488	87.5	B6xCAST	TTTGCTTGTTTGGGGACTATCCATACCTCCCACCCCTGATTTATGGAGAAAGGAAACACCACCTTTAACCCTACCGTGTAGATCCAGAGGGCTCTACACAGCAAGCTCTATACCGTGAGAGTTGGTGCAGAAACAAGGAGGGCAGGGGAAGGAGGCGGGGCTGCCTGAGAAAGGCTCCAGGCTGAGGTGATCGTTCTCAGATGGTTCAGATTGTCATCTCAGTTACCTCAAACTTTCCAGAGAGAAGTCACAAAGGAAGCAGTCCTCTCGTGACCAACATCCAGGCTAGAGCTTTCCAGTTCCCTTCAGAGATAGTCTAAGGAGGGACGACTGGTGGATACTCTTGTAAACAAGATACAAACCACCAATTTGCATAGTTCCAGTTCTTTCCATTTTGAT…	TGCTTGTTTGGGAACTATCCATACCTCCCACCCCTGATTTATGGAGAAAGGAAACACCACCTTTAACCCTACCGTGTAGATCCAGACGGCTCTACACAGCAAGCTCTATACCGTGAGAGTTGGTGCAGAAACAAGGAGGGCAGGGGAAGGAGGTGGGGCTGCCTGAGAAAGGCTCGAGGCTGAGGTGATTGTTCTCAGATGGTTCAGATTCAGTCATCTCAGTTACCTCAAACTTTCCAGAGAGAAGTCACAAAGGAAGCAGTCCTCTCGTGACCAACATCCAGGCTAGAGCTTTCTAGTTCCCTTCAGAGATAGTGTAAGGAGGGACGACTGGTGGATACTCTTGTAAACAAGATACAAACCACCAATTTGCATAGTTCCAGTTCTTTCCATTTTGAT…
chr19	22568010	22568011	87.5	15	B6xCAST	CTCTGAGACTAGAAAAGTGATAAACACTTTCTTTTTTTTAAGTTTTCTTGGTCTTGGTACCTTATCACAGCATTGTTTTTTTAAAGACAGCTTTTACCCACTGAGCCATCTCGCTGGCCCTGGTTGGTTTCCTTTCATGCTTTTTTGTGGGGAGGTAGCATAGGCAAGAACTAAGGTCCCTTCACATAGTAGGCAGGCACTCTCCCATTGAGCTACTTTCATGCATCTGATTCAGTAGCACTTACAGTTTACATGTGTGGCAGTAGAGACTGGAGGACTTTTAAGTGAAGGATCTTAGATCAAACCACTTAAAAACAACAGGCAAGATTTCTTGTGATGGTATCTGGCTCTAAGGCCCATCCATTTCCCTCCACATCTGGGCTTCTCAGACTCTTGATG…	TCTGAGACTAGAAAAGTGATAAACACTTTCTTTTTTTTAAGTTTTCTTGGTCTTGGTGCCTTATCACAGCATTGTTTTTTAAAAGACAGCTTTTACCCACTGAGCCATCTCGCTGGCCCTGGTTGGTTTCCTTTCATGGGTTTTTTGTGGGGAGGTAGCATAGGCAAGAACTAAGGTCCCTTCACATAGTAGGCAAGCACTCTCCCATTGAGCTACTTTCATGCATCTGATTCAGTAGCACTTACAGTTTACATGTGTGGCAGTAGAGACTGGAGGACTTTTAAGTGAAGGATCTTAGATCACACCACTTAAAAACAACAGGCAATATTTCTTGTGATGGTATCTGGCTCTAAGGCCCATCCATTTCCCTCCACATCTGGGCTTCTTAGACTCTTGATG…
chr19	29654075	29654076	351	9	B6xCAST	CCTGTGAGGAGAGCATGCTCACCAGGTATGGGTCCCTTGCACTGAAAGCTGACCAAAGAATGCTATTACCTTATGTTACATCATTATTAAAAGGAAGGAAGGTGCCAAACCAGTCCAAACCAGTCGCCAAAGACAGAAGCAGACATCAAAGCTAGGAAACCGAGTGAATGAAAAGGATTAGAAAACCAAGTAGGAATCCCAGATGCAGGCTGGAGCCTGGCCGTCTGCGGCACACGGTGGCCGTCTGCGACACAGGGGTACCTGAAGTTGGACTGAGGCCACTGTACTGTGGGTTTGTTTCTCTCCTCTGTCTCCTGTATGCCAGAGAGCTCTCCAACTAGCAAGCTATGACCTTGAACTCTGACACGCACACCCCTGCCCCCCATCCATAGCATCCAC…	CCTGTGAGGAGAGCATGCTCACCAGGTATGGGTCCCTTGCACTGAAAGCTGACCAAAGAATGCTATTACCTTATGTTACATCATTATTAAAAGGAAGGAAGGTGCCAAACCAGTCCAAACCAGTTGCCAAAGACAGAAGCAGACATCAAAGCTAGGAAACCTAGTGAATGAAAACGATTAGAAAACCAAGTAGGAATCCCAGATGCAGGCTGGAGCCTGGCCGTCTGCGGCACACGGTGGCCGTCTGCGGCACAGGGGTACCTGAAGTTGGACTGAGGCCACTGTACTGTGGGTTTGTTTCTCTCCTCTGTCTCCTGTATGCCAGGGAGCTCTCCAACTAGCAAGCTATGACCTTGAACTCTGACACGCACACCCCTGCCCCCCATCCATAGCATCCAC…
chr19	30201223	30201224	198	6	B6xCAST	ACAAGAAGAGGAGAAAGGATGCAGAAAAAAGTTTTCAGACCAGGCTTTGGAGCAAGAAGGAAGCAACAGACATGTAGGTATTTGAGCTTCTAGAGTTTGTAGCTTCCTCCTAGAGGGGGAGGGGGCAAGGAGGATGGAGGGAGCTAGCTGATAAGATTAGGGCAGGAAATTCTTTACCCAGCCATTGAGTTGTCTGGCTAGTTTTAAAATAATAAAACTGCCTAGTGTTTTTCATCCATGACACTAAGGTGAGCAGGAGGAGAAAGTGGGCAGCTGGGGTGGTTGTTGGTATCTGGTGGAGCTAGCCATGAGGGACTAGGGGAGCAATTGCAGTTCCTGGGAAAGAAAGGCCAACTGGTCATTGGCAGAGGGATTGGGGGTGGGGAACTAGGGCTGGTG…	AGAAGAGGAGAAGGGATGCAGAAAAAAGTTTTCAGACCAGGCCTTGGAGCAAGAAGGAAGCAACAGACATGTAGGTATTTGAGCTTCTAGAGTTTGTAGCTTCCTCCTAGAGGGGGAGGGGGCAAGGAGGATGGAGGGAGCTAGCTGATAAGATTAGGGCAGGAAATTCTTTACCCAGCCATTGAGTTGTCTGGCTAGTTTTAAAATAATAAAACTGCCGCCTAGTGTTTTTCATCCATGACACTAAGGTGAGCAGGAGGAGAAAGTGAGCAGCCAGGGTGGTTGTTGGTATCTGGTGGAGCTAGTCGTGAGGGGCTAGGGGAGCAATTGCAGTTCCTGGGAAAGAATGGCCAACTGGTCAGTGGCAGAGGGGTTGGGGGTGGGGAACTAGGGCTGGTG…
chr19	38011670	38011671	329	60.5	B6xCAST	TGCACACACTCACATACACACAGAAGGAAAATGAACCTCAGAGGGTCTGGCCTCTGTAAATGAAGATCCCCAGTTAACTCCATCCAAGTCCACTTAAGGAGCTGGGTGACCCCAGTGATTTGCCAAACCTCTTGAGTCATATTTCTCTCGTTTGTCAATTGAAGATATGACTGTCTGACTGTTACAAAGATTAAAAGCAGTTACATGTGGGATAGCTGTAGCCTAATCCCTGGATTTCTGTAAACTCGCAAAAACAGAGATTGTATTGTTCATCAGGAAATTGCAGTAGTGTTTCTCTAATTATATCAGATGTGCCCCAGCTAGCCTTCACTGAGGAAGTACTGTAGTTCCCATTGTAAAGATGAAGGAACTTCTTAAGAGTTACCCAACCAGTAAATG…	GCACACACTCACATACACACAGAAGGAGAATGAACCTCAGAGGGTCTGGCCTCTGTAAATGAAGATCCCCAGTTAACTCCATCCAAGTCCACTTAAGTTGCTGAGTGACCCCAGTGATTTGCCGAACCTCTTGAGCTATATTTCTCTCATTCGTCAATTGAGGATATGACTGTCTGAGCGGTTACAAAGATTAAAAGCAGTTACATGTGGGATAGCTGTAGCCTAATCCCTGGATTTCTGTAAACCCACAAAAACAGAGATTGTATTGTTCATCAGGAAATTGCAGTAGTGTTTCTTTAATTATATCAGATGTGCCCCAGCTAGCCTTCACTGAGGAAGTACTGTAGTTCCCATTGTAAAGATGAAGGAACTTCTTAAGAGTTACCCAACCAGTAAATG…
chr19	38322078	38322079	475.5	83.5	B6xCAST	GAGCAGCACACAGACCCCTTATAACAGATCTATCAACTAAAAGGGCTTACAGCATCTACCTAGAAGTACACTCCTAGTCACACCTACATCCTTGAATATTATGAAATGAAATTTGGTATTATTGATCATAAATAACCCAGGACTTTGAACTATCTAAATTCAGTCCCCTTTATTTCCAGCATTTCATAGTTAGCAACTTCTAAATCTTCTTCTCTCCCGGGGAGAAAGTTTAAAGGGCAACCTAGGAGTAGAGAGATGGCTCAGCAGTTAAGGGCACCTGGAGTCAGATCCCAGCACCCACAGCAGGTGGTTGCCTGTAGGATGGAACTCTAGTTCCAGCAGTGAAACTGATGCCTTATTCTGGCCTCCACAGCACCCCCCCCACATACATGGTGTACA…	GGCGCAGCATGCAGACCCCTTATAACAGATCTATCAACTAAAAGGGCTTACAGCATCTACCTAGAAGTACACTCCTAGTCACACCTACATCCTTGGATATTATGAAATGAAATTTGGTGTGTATTATTGATCATAAATAACCCAGCACTTTGAACTATATAAATTCAGTCCCCTTTATTTCCAGCATTTCATAGTTAGCATCTTCTAAATCTTCTTCTCTCCCAGGGAGAAAGTTTAAAGGGCAACCTAGGAGTAGAGAGATGGCTCAGCAGTTAAGGGCACCTGGAGTCAGTTCCCAGCACCCACAGCAGGTGGTTGCCTGTAGGATGGAACTTCCAACAGTGAAACTGATGCCTTATTCTGGCCTCCACAGCGCCCCCCCCACATACATGGTGCACA…
chr19	41225191	41225192	105	17	B6xCAST	GTTCCTATGTGAGATTCATGGCCAAGAGAATGTTTATAAGCCATCAACAGAACCTCACTGATGAAGGTACAGGACCTCTTGGAACTCTTTTAGATAAGAGTAGGTCGGTCTCTCTCCCTCTCCCCTTCTCCCCTTTACCCCCTTTCTTCCTCCTGTCTCTGCTCACTCCACCCTGAGGCAGTCTCATGTATTCCAGGATAGCTTTAAACTTGCTATGTAGCCAAAAATGACTTTGAGCCTCTGGCTCTCTGTCTGCTGAAATTAATCACATGTATATGGCACTGGGTGGGGAAGAGCCAGGCTTTTGTGCATAGGCCCACACTATAAACTCCACTACCTCCTCAGCCCAGGAAAACAGTTGGCTTTTTTTACATGTCCCTAAGTCTAATAACATAGATT…	GTTCCTATGTGAGATCCATGGCCAAGAGAATGTTTATAAGCCATCAACAGAACCTCACTGATGAAGGTACAGGACCTCTTGGAACTCTTTTAGATAAGAGTAGGTCAGTCTCTCTCCCTCTCCCCTTCTCCCCTTTACCCCCTTTCTTCCTCCCGTCTCTGCTCACTCCACCCTGAGGCAGTCTCATGTATTCCAGGATAGCTTTAAACTTGCTATGTAGCCAAAAATGACTTTGAGCCTCTGGCTCTCTGTCTGCTGAAATTAATCACATGTATATGGCACTGGGTGGGGAAGAGCCAGGCTTTTGTGCATAGGCCCACACTATAAACTCCGCTACCTCCTCAGCACAGGAAAACAGTTGGCTTTTTTTACATGTCCCTAAGTCTAATAACATAGATT…
chr19	47491057	47491058	162.5	16	B6xCAST	CATGCACTTTCAAGCAAACTGTAAACCAGTTTAAGAAGCCATTTTAGGTAGTTTTTGTCTTTTTTGGTTATGAGGCAAGTCTCACAGGTCCGGCTGTCCTGGAACTCTTGATTTAGATAGACCAGGTTGGCCTTGAACTCACAGAAATCTGCCTGCCTCTGGAGCTGGGATTAAAGAAGCTATACCTCTTCTAGGTTCTGTTGGTTGGAAGCCACTCAATCTAGGCTCTGAGAATCAAACTGAGGTCCTGTGGAAGGAAAAGCAGTGTGGACGAGAACTCCTGGCAAGAACTTGAGATGGGAAGAGGCTGGGGTGTTGCTGGTCCAATGCCTAGTTACAGTCCGTTTGGGCTCTCTTTAGCCCCTAAATGGTCCTTCTCTGTCCACCTACCTCTGTGTT…	CATGCACTTTCAAGCAAACTGTAAACCACAGTTTAAGAAGCCATTTTAGGTAGTTTTTGTCTTTTTTGGTTATGAGGCAAGTCTCACAGGCCCAGATGTCCTGGAACTCTTGATTTAGATAGACCAGGTTGGCCTTGAACTCAGAAATTTGCCTGCCTCGGGAACTGGGATTAAAGAAGCTATACCTCTTCTAGGTTCTGTTGGTTGGAAGCCACTCAACCTAGGCTCTGAGAATCAAACTGAGGTCCTGTGGAAGGAAAAGCAGTGTGGACGAGAACTCCTGGCAAGAACTTGAGATGGGAAGAGGCTGGGGTGTTGCTGGTCCAATGCCTAGTTATAGTCCGTTTGGGCTCTCTTTAGCCCCTAAATGGTCCTTCTCTGTCCACCTACCTCTGTGTT…
chr19	47548926	47548927	251.5	24.5	B6xCAST	GACCATCCCAACTTTTATTTAAAAACAAAAACCCAAAAACATTTTATTGGGGACGGCTTACAGTTCAGAGGTTTAGTCCATTCTCATCATGGCAGGAAGCATGGTGGCATGCAGGCAGACATGGTGCTGGAGAGGTAGCAAAGAGTTCTACATCTCGGTCTGCAGGCAGCAGATAGAGTGTGATACCAGGTCTGGCTTGACCCCACCCCCAGTGACACACTTCTTCACTAAGGCCACACCTACCCCACCAAGGCCATATCTCCTAATAGCGCCACTTTCTGTGAGTCTATGGCGGCCATTTTTGTTCAAACCACCACAAATGTGTTTCTCTGGAGTAACCCCATAGTAAACGGAGGAGTATTTCTACATATGAATACTAAAAATACATGTTGAAGGAAG…	GACCATCCCAACTATTATTTAAAAACAAAAACCCAAGAACATTTTATTGGGGCTGGCTTACAGTTCAGAGGTTTAGTCCATTCTCATCATGGCAGGAAGCATGGTGGCATGCAGGCAGACATGTTGCTGGAGAGGTAGCAGAGAGTTCTACATCTTGGTCTGCAGGCAACAGATGGAGTGTGATACCAGGTCTGGCTTGACCCCACCCCCAGTGACACACTTCTCCACTAAGGCCACACCTACCCCACCAAGGCCATATCTCCTAATAGCACCACTTTCTGTGAGTCTATGGCGGCCATTTTTGTTCAAACCACCACAAATGTGTTTCTCTGGAGTAACCCCACAGTAAACGCAGGAGTATTTCTACATATGAGTACTAAAAATACACGTTGAAGGAAG…
chr19	49720331	49720332	512	61	B6xCAST	CTATAAAGAAAGATTAACTACGAAATTGAAATTTTCTGTTTAAAAACAGAGAAGAAAGAAAGCATGGCAAGCAAGACTTTAATGCCCTCCTTTATGATCTTTAAAATAACTGGGGACGTATAAAAGAATCCTCAGCCAGTAGCTGCTTACCATCGCAGAACCGGTGTTGGCAATACTGACAACAGATACAAGACCATTTTTCTGGGTCAGTTAATAAAATGGGTCCTAACTTGCACGATCACAAGATGAGCAGTGCTTCTCAAGGCAGCTTCCAGCAGATGGATGGCTGTTTGTGTAACTTGTTGCCTCCGATTGATCAGGCAAAGTGAGCAGGAAGTCTTTCCTGTATGAGGACCAGATTTCATTCCAAGCAGCACACATTTAAGCCATAAAGTGTCT…	CTATAAAGAAAGATTAACTACGAAATTGAAATTTTCTGTTTAAAAACAGAGAAGAAAGAAAGCATGGCAAACAAGACTTTAATGCCCTCCTTTATGATCTTTAAAATAACTGGGGACGTATAAAAGAATCCTCAGCCAGTAGCTGCTTACCATCGCGGAACTGGTGTTGGCAATACTGACAACAGATACAAGACCATTTTTCTGGGTCAGTTAATAAAATGGGTCCTAACTTGCACGATCACAAGATGAGCAGTGCTTCTCAAGGCGGCTTCCAGCAGATGGATGGCTGTTTGTGTAACTTGTTGCCTCCGATTGATCAGGCAAAGTGAGCAGGAAGTCTTTCCTGTATGAGGACCAGATTTCATTCCAAGCAGCACACATTTAAGCCATAAAGTGTCT…
chr19	52632657	52632658	214	26.5	B6xCAST	ATGCTCTGGGCCACCACCAACTCCACTGCTTCCATTTGCCTGCTCGTCTATGCTTCTGCAATCCCGAAGTGTAGAGGCAAGAGGAATGGTTTAACTTACGGATCTAGAGGAATCAGCAGCCAGCAGTATGTTCACTTTGGACAGAAAACAATGTGAATTACTGATTGTGTGTGTGTGTGTCCCTTTCTGACTCCCCATCCCCTTCCCTTCTCTCTTCAACCTATTGCATTTAAAAGAGCATTTTCTTACTGACTTCTCCTGAAGTTTTGTTGGGATATGTTTTGGATTTTCCAAAAGAAACTTCCTGAAGACAGAAAACTTACCAGGGTTTTTCAGGAGAAAAAGCAGAGCTAGAGTTTGCTCACTGTTATAATGTTGGTCTTAGAAATGTAACCACAC…	GCTCTGGGCCACCACCAACTCCACTGCTTCCATTTGCCTGCTCGTCTATGCTTCTGCAATCCCGAAGTGTAGAGGCAAGAGGAATGGTTTAACTTACGGATCTAGAGGAATCAGCAGCCAGCAGTATGTTCAGTTTGGACAGAAAACAATGTGAATTACTGATTGTGTGTGTGTGTGTGTCCCTTTCTGACTTCCCATCCCCTTCCCTTCTCTCTGCAACCTATTGCATTTAAAAGAGCATTTTCTTACTGACTTCTCTGGAAGTTTTGTTGGGATACGTTTTGGATTTTCCAAAAGAAACTTCCTGAAGACAGAAAACTTACCAGGGTTTTTCAGGAGAAAAAGCAGAGCTAGAGTTTGCTCACTGTTACAATGTTGGTCTTAGAAATGTAACCACAC…
chr19	56077748	56077749	150.5	26	B6xCAST	ATTTCTTCCACAACTGAGTTTTAAGTTTCCAGCTCTGTGGGAGGATATGAAATTATTTCTGCTATTAGAACTTGGGTTGAGTTTTGAAACGAGAACATTCGTTCTGAGCAAGAAATGCAAGCGGTGACCTTCCACAAACAGTCATGTCGGGCCTTACATAACCCAGAAGGATATTTTAAGAGCAGGGCAGACCAATGAGTGTTCAGGCAAAAGGTTGGAGAAGTAGGTTAAAGAAGGGGAGAAAACGAATCCTTCTCATCCAGGTGACACCCCCGCCCCCCACCCCCAAACAGGTAAAATGACTCAGCCTTTCAAGTAGGTGACAATGCTCATGGAAAAATATGACCCAGTGGTTTCCATCAGGGCTTTTCAGTTGGCAACCGTTGGGCTTTTGATGGT…	TTTCTTCCACAACTGAGTTTTAAGTTTCCAGCTCTGTGGGAGGATATGAAATTATTTCTGCTATTAGAACTTGGGTTGAGTTTTGAAACGAGAACATTCGTTCTGAGCAAGAAATGCAAGCGGCGACCTTCCACAAACAGTCATGTCGGGCCTTACATAACCCAGAAGGATATTTTAAGAGCAGGGCAGACCAATGAGTGTTCAGGCAAAAGGTTGGAGAAGTAGGTTAAAGAAGGGGAGAAAACGAATCCTTCTCATCCAGGTGACACCCCCGCCCCCCCACCCTCAAACAGGTAAAATGACTCAGCCTTTCAAGTAGGTGACAATGCTCATGGAAAAATGTGACCCAGTGGTTTCCATCAGGGCTTTTCAGTTGGCAACCATTGGGCTTTTGATGGT…
chr19	58509655	58509656	211	11	B6xCAST	TTAGAACTTAGGAAAGTCGTCAATCTAAGAAAGGGGAAGAGACACATTTAAATCAAAGAGCCTTGTGTAAGGCCTTCTAGCAAAACAATTATTGATGTCTGCACATCCCAGGTGCTAAGTGATCAGGAGAAGCATCAGAGGGCAGGGATAATGACCGATCCCCACTCATGCTCCAAAGGTAGGCAATTCACTCAAATGTGCACAGATGGGAAGTTTAGGTCTGAGAATCATGTGTGGGTGTCATAATGCAAATAACTGACTTTCTTTCTAAAGAACATCTGTCGAAGCATCTGAAAGCAATTGTTTATCCTGCTGCCAAAATGCTGTAAAATATAATAATTCTCTATTGAGGTTAGAATTATCCAGGGGAAGCAAAACGTTTTTTCTTCTTCTTGTTTT…	TTAGAACTTAGGAAAGTCGTCAATCTAAGAAAGGGGAAGAGACACATTTAAATCAAAGAGCCTTGTGTAAGGCCTTCTAGCAAAACAATTATTGATGTCTGCACATCCCAGGTGCTAAGTGATCAGGAGAAGCATCAGAGGGCAGGGATAATGACTGATCCCCACTCATGCTCCAAAGGTAGGCAATTCACTCAAATGTGCACAGATGGGAAGTTTAGGTCTGAGAATCATGTGTGGGTGTCATAATGCAAATAACTGACTTTCTTTCTAAAGAACATCTGTCGAAGCATCTGAAAGCAATTGTTTATCCTGCTGCCAAAATGCTGTAAAATATAATAATTCTCTATTGAGGTTAGAATTATCCAGGGGAAGCAAAACATTTTTTCTTCTTCTTGTTTT…
chr2	4474648	4474649	478	72	B6xCAST	TGAGAGCCTGCTCGTACTTTCCCTGTCTGCCCACGTTCTTCACACTCTGCTTCCCCCCCTCCCCCCCCCCCCCCCCGCACCAGGAAACAAAACAAAACAATAACCTCCTTTAGACAGATGTTCCCGAAATCTCCTCTGTCTGTATCTATGCCCGCACACCCCTGTGCATGCTCAAATGCCCAGGTGAGGTTACTGGCTGGCAAGGCCAGTACAGTCAAGCCCAGCCCCCAGGAATGAGGTGGGGCCATTGAGGTAGGATGGAAGCAAGAATAGGCAGCTTCTGTGTTGGTCAGTAGGAAAGCCACCTTAGGCGACCTTGGCTATGGTTGATCTTGGAGATCTGTGAGTTTGCAAGATGTCCACACGTAAGCCTGGGGCTCTGACTTCAATCCCCAGAAT…	GAGAGCCTGCTCGTACTTTCCCTGTCTGCCCACGTTCTTCACACTCTGCTTCCCCCCCTCCCCCCCCCCCCCCCCTGCACCAGGAAACAAAACAAAACAATAACCTCCTTTAGACAAATGTTCCCGAAATCTCCTCTGTCTGTATCCATGCCCGCACACCCCTGCACATGCTCAAATGCCCAGGTGAGGTTACTGGCTGGCAAGGCCAGTACAGTCAAGCCCAGCCCCCAGGAATGAGGTGGGGCCATTGAGGTAGGATGGAAGCAAGAATAGGCAGCTTCTGTGTTGGTCAGTAGGAAAGCTACCTTAGGCGACCTTGGCTATGGTTGATCTTGGAGATCTGTGAGTTTGCAAGATGTCCACACGTAAGCCTGGGGCTCTGACTTCAATCCCCAGAAT…
chr2	4477469	4477470	1426	175.5	B6xCAST	CTCTGCTTCTCCATGCCAAGAAGTGCTAACACGACAGTCCCCTGCATGTGTGTGTGTGTGTGTGTGTGTGTGTGTATACGCACAAGTACACACATGCAGCTGCTGATAATCAAACCCAGGACCTCAAGTATCATAACCACAGAGCCACATCCTCATCTCAAAAGGAAACATTTTAATAACTGTGTTCAAATTGAGTAAGTATGTTCCCAAGGTGTTTTTGTTCACATGAGTGTGCACCCACTATACTCTGTTTTACCCACACACAGACACACGTGCATTTGTACTAGCACGCACACACACACACACATCAAAAATGTCTAAATTTTAAAGCACTATTTAAAGATCAAATTTCTCCCAGGGCCTATGCTTCAGAAAGTCTCTAGGTTGTCCAAACTGCCC…	CATGCCAAGAAGTGCTAACGCGATAGTCCCCTGCGTGTGTGTGTGTGTGTGTGTGTGTGTGTGTATACGCACAAGTACACACATGCAGCAGCTGATAATCAAACCCAGGCAAGTATCATAACCACAGAGCCACATCCTCATCTCAAAAAAAAACATTTTAATAACTGTGTTCAAATTGGGTAAGTATGTTCCCAAGGTGTTTTGTTCACGTGAGTGTGCACCCACTATACCCTGTTTTACCCACACACAGACCCTCGTGCATCTGTACTAGCACGCACACACACACATACACACACCTCAAAAATGTCTAAATTTTAAAGCACTATTTAAAGATCAAATTTCTCCCAGGGCCTATGCTTCAGAAAGTCTCTAGGTTGTCCAAACTGCCCTCCTTTGCCC…
chr2	13526407	13526408	248.5	40.5	B6xCAST	GACTCAGGTGTAATGCTGTCGTTTTTGGACTCGACCATGTAGAACTTATTTTGTAATCAACTATATTGGGAAAGGTCTGGGGATCTTTAAGTGCCCATCTATTAATATGCTTCTCTGTTCAGTGAGTGTGTAGTGATGAGTAGCTGCACTCTTGTCTAGTGCTCTCTGCTGATTTACTAGCAAATCAAAAGGCCTCATGTTCAGATACCAGCAAGTAGTTTATTGTTTTGTCCTTAGCACAAGGAACTTCAAATGATTATACACAGGAGTAATTAAAATAACACCTAACTTGTTCCTTTTACACATGCATATAAAACGCATATATGTGTACACAGATCAGAAGATAAACAATGAGAACACATGTCAGGGATTTGCCAATACTCCTTAAGCAGTCTTGGC…	GACTCAGGTGTAATGCTGCCGTTTTTGGACTCGACCATGTAGAACTTATTTTGTAATCAACTATATTGGGAAAGGTCTGGGGATCTTTAAGTGCCCATCTATTAATATGCTCCTCTGTTCAGTGAGTGTGTAGTGATGAGTAGCTGCACTCTTGTCTAGTGCTCTCTGCTGATTTACTAGCAAATCAAAAGGCCTCATGTTCAGATACCAGCAAGTAGTTTATTGTTTTGTCCTTAGCACAAGGAACTTCAAATGATTATACACAGGAGTAGTTAAAATAACACCTAACTTGTTCCTTTTACACATGCATATAAAACACATATATGTGTACACAGATCAGAAGATAAACAATGAGAACACATGTCAGGGATTTGCCAATACTCCTTAAGCAGTCTTGGC…
chr2	18202253	18202254	107.5	16	B6xCAST	TTTACCACTGTAGATACTGTCCAGTAACCTCATCCATTTCCCTAGAGTGTCTAAACATAGACCTTTCCTCATATAATTCCTACAGTATAATTATGTGAAAGTAATGTGGTTTTTTTTTTCTTATTAAAATCTGGAGAAAATATTTCTCAGTTGGAACCAAGGAGTCTGAAATACAGAATGAGAAAATTATACCACTGCTCTCTTATTTTTATATTGTATTTCTATACTGTTTATAGTTTCCTTTTCAAATGAGGAAGTTAGTAGACTCCTGCTCATGTTTAGTAGAGGAAGGGTTTCCATGTCCCCCTTTTAAAGTTACATCATCACACAAGTTATCCAAAATGGATTCAGAAGCCCTTGGTGCAATTTTGCTTAGTAAAACTTTTTATTTTAAGCAGA…	TTTACCACTGTAGATACTGTCCAGTAACCTCATCCATTTCCCTAGAGTGTGTAAACATAGACCTTTCCTCATATAATTCCTACAGTATAATTATGTAAAAGTAATGTGGTTTTTTTTTTCTTATTAAAATCTGGCGAAAATATTTCTCAGTTGGAACCAAGGAGTCTGAAATACAGAATGAGAAAATTATACCACTGCTCTCTTATTTTTATATTGTATTTCTATACTGTTTATAGTTTCCTTTTCAAATGAGGAAGTTAGTAGACTCCTGCTCGTGTTTAGTAGAGGAAGGGTTTCCATGTCCCCCTTTTAAAGTTACATCATCACACAAGTTATCCAAAATGGATTCAGAAGCCCTTGGTGCAATTTTGCTTAGTAAAATTTTTTATTTTAAGCAGA…
chr2	18928446	18928447	514.5	41.5	B6xCAST	TGTTCCTGTGTTTACAGAGATATATAGTAAAAAAACAAAAGCAAAAACAAACAAACAAACAAACTAAGACAGAGGAGGGGGTCTTAGCCAACTAAGTACAGGAAGAGATGAACACAGGAAGGGTCTAGCATTATTAACATGGAGTGCTAGGCCAGAAAATGGCGTTGCTTACTGCTGTGCTTGTCTGAGCAGAGGCTGTTAAAGAGATACTGAAGAAGAGCGAGGACTTGGGTTGGGACGAGAGAACACATTACTGAGCACAGGAAGTACCAGAGAATGAATTCACGGGCCACATAATGAGGACCTCCCTCCAGTCAGCTCAGTGTATGCAGCAGAGTGAAATGGAAGGATGAAGGATGCTGGGTGCCAGGCATTACCGAGCTGGCCCGAGTACCAGCT…	ATATAGTAAAAAAAAAACAAAAGCAAAAACAAACAAACAAACAAACAAACAAACTAAGACAGAGGAGGGGGTCTTAGCCAACCAAGTACAGGAAGAGATGAGCACAGGAAGGGTCTAGCATTATTAACATGGAGTGCTAGGACAGAGGGTTCCAGAAAATGGCGTTGCTTACTGCTGTGCTTGTCTGAGCAGAGGCTGTTGAAGAGATACTGAAGAAGAGCGAGGACTTGGGTTGGGACGAGAGAACACATTACCGAGCACAGGAAGTACCAGAGAATGAATTCACGGGCCACAGAATGAGGACCTCCCTCCAGTCAGCTCAGTGTATGCAGCAGAGTGAGATGGAAGGATGAAGGATGCTGGGTGCCAGGCATTACCGAGCTGGCCCGAGTACCAGCT…
chr2	22843614	22843615	162	25	B6xCAST	CTTTCCTTCTGTGTCATTTAATCAAGGGTGCAGCCAAATCTGAAGTCTCTACTTCATGCTCCCTATCTTCCATCCTCTGTCTGTTTGCTGTGTGGGTCTGAACCATGCTTACCTTAAGGCTGCCTTGTGAATCTGTCCTGTGTATGTATATGTGTCTGTCCCTGGTGTCTGTGTGTACTTGTCTCTGTTGCGTCTATCAAAGGGATTTGTTCTGTATTTATTGAACAGCACAGAAAGCATCCCATGAGGAAGGAATGGGGTACTTTAAAAACATTTTAAACAGAGTTTTACAAGAGATAAAGTCACCTATTCCAACCAACCCAGTTAACAAACACCACTGTTTACTGATCAATTTCAAATGTTGTATGTTATGCTCCACTTTTACAGTAAATATTCATG…	CTTTCCTTCTGTGTCATTTAATCAAGGGTGCAGCCAGATCTGAAGTCTCTACTTCATGCTCCCTATCTTCCATCCTCTGTCTGTTTGCTGTATGGGTCTGAACCATGCTTACCTTAAGGTTGTCTTGTGAATCTGTCCTGTGTATGTATATGTGTCTGTCCCTGGTGTCTGTGTGTACTTGTCTCTGTTGCATCTATCAAAGGGATTTGTTCTGTCTTTATTGAACAGCACAGAAAGCATCCCATGAGGAAGGAATGGGGTACTTTAAAAACATTTTAAACAGAGTTTTACAAGAGATAAAGTCACCCATTCCAACCAACCCACTTAACAAACACCACTGTTTACTGATCAATTTCAAATGTCGTATGTTATGTTCCACATTTACAGTAAATATTCATG…
chr2	25973376	25973377	274.5	17.5	B6xCAST	GAGATAGCCAAGCACCATAACTAGCAGTCTGATAGGCAGAATCTCACCTACCTAGGAGGGAAAGTTCCTTTCGCCCTTAAGCAGCAGCAGCAGCAGGGAGCACCCCCAAAAGTAGACTGAACCAGACGCTCAGGGCTGGGCACAGGGCCTGTCAGAACACTGCGAACACTGGAGCTCCAGTCTTCAGGCAAAGCCAACAGGATACGAGCTGGCTGCTTCCTCCTGGAATCTCCTGAAATCTCCACTCCAGTGTGATGACTGACACACACCAAGATGCATCAAGTGTTGAAACATCTCGGACATTTAAAAGTAGCCAGCACAAATAACTGCAAGAGTCAGAAACTCTGAAGCAAACTAAAAAAGTTCAGCAAAGAAAGCTTTTTAAAGCACTAAATATAG…	AGATAGCCAAGCACCATAACTAGCAGTCTGATAGGCAGAATCTCACCTACCTAGGAGGGAAAGTTCCTTTCGCCCTTAAGCAGCAGCAGCAGCAGGGAGCACCCCCAAAAGTAGACTGAACCAGACGCTCAGGGCTGGGCACAGGGCCTGTCAGAACACTGCGAACACTGGAGCTCCAGTTTTCAGGCAAAGCCAACAGGATACGGCGCTGGCTGCTTCCTCCTGGAATCTCCTGAAATCTCCACTCCAGTGTGATGACTGACACACACCAAGATGCATCAAGTGTTGAAACATCTCGGACATTTAAAAGTAGCCAGCACAAATAACTGCAAGAGTCAGAAACTCTGAAGCAAACTAAAAAAGTTCAGCAAAGAAAGCTTTTTAAAGCACTAAATATAG…
chr2	49632585	49632586	71.5	3.5	B6xCAST	ACAGCAGCAACAACAACAACAACAATATAAATCAGAGAGAGAGAGGGAGAGGGAGGGAGAGAGAGAGAGAGAGAGAGAGAGAGAGAGAGAGAAAGAGAGCCCCAAAGGAAGACATCCTGAGATGATCTCTGGCTTTGGCACACACAAGTGATTTTGTGCACCTGTCCCCCAACTCCAAAGTCTATATAAACCAAATATAAAGTAGTACCAAGTAGGTTATGGGGAATTTGATGTTAAATACATTCATTGTCACTCAAAAATGTTTCCATTTTTAAAGAGGTGTTTTGTGCATTGCCCAGTCTGGTGGCCACTGGTCACATCCAGTCTATTGAACAACTTGGAATACTGCTCATCCATGTAGGGATGTTTGGTAGTTGCAAAATATATACCAGACACTGA…	AGCAACAGCAACAGCAACAACAGCAACAACAACAACAACAATAAAAATCAGAGAGAGAGAGGGAGGGAGAGAGAGAGAGAGAGAGAGAGAGAGAGAGAGAGAAAGAGAGCCCCAAAGGAAGACATCCTGAGATGATCTCTGGCTTTGGCACACACAAGTGATTTTGTGCACCTGTCCCCCAACTCCAAAGTCTATATAAACCAAATATAAAGTAGTACCAAGTAGGTTATGGGGAATTTGATGTTAAATACATTCATTGTCACTCAAAAATGTTTCCATTTTTAAAGAGGTGTTTTGTGTATTGCCCAGTCTGGTGGCCCCTGGTCACATCCAGTCTATTGAACAACTTGGAATAATGTAGGGATGTTTGGTAGTTGCAAAATATATACTAGACATTGA…
chr2	59395364	59395365	391	48	B6xCAST	TGGATGCAGTTCTGAGGCAAAAAGTTTCACGGAAACTTAGTCTTAGCATCCCATAGCACGAATGCTCCAAACTTGTCCCTACATCAGTCGGTGAACGGATCTTTGTGCTTTCCTTCAATATTGTTTAATTATAATAAAACTGGAACTGTTAGCAAGAATAAACCCCTTCTCCTACAAGCTGCATTAAGTAAGGGTGGTTTACCACTATTTAAGTGCTTCTAAGGAATGATTTTGACATATAGCTAAATTAGATTAGCCTCCACCAGTGTTCTAATATCCTAGGAAATTGTTGAGCCAACCTTGGGTTTTGTTTTTAGTAAGAATGCTACTCACTCAGACAAAGTGCCTCCAGTGTAGACAGTGAAAGATATCAGGCATTACAATTTACTGGAAAAGAGC…	TGGATGCAGTTCTGAGGCAAAAAGTTTCACGGAAACTTAGTCTTGGCATCCCATAGCACGAATGCTCCAAACTTGTCCCTGCATCAGTCGGTGAACGGATCTATGTGCTTTCCTTCAATATTGTTTAATTATAATAAAACTGGAACCGTTAGCAAGAATAAACCCCTTCTCCTACAAGCTGCATTAAGTAAGGGTGGTTTACCACTATTTAAGTGCTTCTAAGGAATGATTTTGACATATAGCTAAATTAGATTAGCCTCCACCAGTGTTCTAATATCCTAGGAAATTGTTGAGCCAACCTTGGGTTTTGTTTTCAGTAAGAATGCTACTCATTCTGACAAAATGCCTCCAGTGTAGACAGTGAAAGATAACAGGCATTACAATTTACTGGAAAAGAGC…
chr2	79739085	79739086	150.5	12	B6xCAST	AAAAAGACCTTGTACACACAGATAAGCACCAGAGAAGCCAGGAGAGTTAAACACACAGCTCATCTTTTTAGTGGAATAAGGTATGCAGCTGCTCTTTCAGGAATGCCAGGAATGATGGAGTTTTACAACCAGTGATCATTTGCTGTCTAATGAGATATGTTCTGTAGTTTCTCCCAGGATTTACTTATTTCATACCCTGCCTGCTATAAAGCTTGCACGGGAATCAGTGTCTCTACTGATTCTTTTCACAAGTAGCATACCCTCTTTATAGGTAAAGTTATTTCCTGTTATTTTATGCTTCCATTGCTAGAGAAAAATTTAAAATTCCGTGAATAGACAGATCTTTGTCTGTTTTGTTCACCAGTACATCTCAATGGCCTACAAGACTTTATGGCACAA…	AAAAAGACCTTGTACACACAGATAAGCACCAGAGAAGCCAGGAGAGTTAAACACACAGCTCATCTTTTTAGTGGAATAAGGTATGCAGCTGCTCTTTCAGGAATGCCAGGAATGATGGAGTTTTACAACCAGTGATCATTTGCTGTCTAATGAGATATGTTCTGTAGTTTCTCCCAGGATTTACTTATTTCATACCCTGCCTGCTATAAAGCTTGCACGGGAATCAGGGTCTCTACTGATTCTTTTCACAAGTAGCATACCCTCTTTATAGGTTAAGTTATTTCCTGTTATTTTATGCTTCCATTGCTAGAGAAAAATTTAAAATTCCGTGAATAGACAGATCTTTGTCTGTTTTGTTCACCAGTACATCTCAATGGCCTACAAGACTTTTTGGCACAA…
chr2	83898706	83898707	67	7	B6xCAST	TTTCTTTCTTTCTTTCTTTCTTTCTTCCTTCCTTCCTTCCTTCCTTCCTTCCTTCCTTCCCTCCTTCCTCACTTTTCTTCTTCCTCTTCTTCTTCCTCTTCCTCTTCTTTTTCTTTTCTTCTTCTCTTCTTTCTTCTTTTCCTCCTCTTCCTCCTTCTTTTCTTCTTTTCCTTCTCCTTTTCCTCCTTTTTCTTCCCCTTCCTCTTCCTCCTCTTCCTTCTCCTCCTCTTCTTCCTTCTCCTCTCCCCCTCCTTCTACTACTGATTCTTTGTGAGTTTCACATCCTGTTCCCCAATCTTACTCATATCCCTGGTCTTCCATGTCCACTCTCTGCTCTTGCAACCTCCTCTCCAAAAGTAGAAAAAAAAATCCAACCCAAAAAAAGATCTTGTCTTGGAA…	TTTCTTTCTTTCTTTCTTTCTTTCTTCCTTCCTTCCTTCCTTCCTTCCTTCCTTCCTTCCCTCCTTCCTCACTTTTCTTCTTCCTCTTCTTCTTCCTCTTCCTCTTCTTTTTCTTTTCTTCTTCTCTTCTTTCTTCTTTTCCTCCTCTTCCTCCTTCTTTTCTTCTTTTCCTTCTCCTTTTCCTCCTTTTTCTTCCCCTTCCTCTTCCTCCTCTTCCTTCTCCTCCTCTTCTTCCTTCTCCTCTCCCCCTCCTTCTACTACTGATTCTTTGTGAGTTTCACATCCTGTTCCCCAATCTTACTCATATCCCTGGTCTTCCATGTCCACTCTCTGCTCTTGCAACCTCCTCTCCAAAAGTAGAAAAAAAAATCCAACCCAAAAAAAGATCTTGTCTTGGAA…
chr2	92784430	92784431	159	25	B6xCAST	CCGGTGGATAAGACTGATTGATTGCACAAGGCCTCTTCTATTAGTGGGGTTATTTACAACGGAGCCACATATTGCAGGGTCAGACAGCTGTTTACACACACGGGGGGCGGGGGGGCGTGTAATACACACACATACAGATGCCCATACATTAACACACACATTTGCACTCTCACACACTTATACACATATACAATACTCTCACACATATACCCTCATACATACACTTTCACCCATGCACACACATGCACACATACCTACTCCCTTGTAGGGAGCAGTAGATCTGTGGCAGAGGTGGTGTGGTTATGAGTGACCATGGCAATGGCAGTGAAAACCTATTGAGCAGCTCTTCTTTCCCCAAGTGACTTTCCAAGTAGAAAATTGTCTTATTACCAAAAAAGG…	CCGGTGGATAAGACTGATTGATTGCACAAGGCCTCTTCTATTAGTGGGGTTATTTACAACGGAGCCACATATTGCAGGGTCAGACAGCTGTTTACACACACGGGGGGCGGGGGGGCGTGTAATACACACACATACAGATGTCCATACATTAACACACACATTTGCACTCTCACACACTTATACACATATACAATACTCTCACATATATACCCTCATACATACACTTTCACCCATGCACACACATGCACACATACCTACTCCCTTGTAGGGAGCAGTAGATCTGTGGCAGAGGTGGTGTGGTTATGAGTGACCATGGCAATGGCAGTGAAAACCTATTGAGCAGCTCTTCTTTCCCCAAGTGACTTTCCAAGTAGAAAATTGTCTTATTACCAAAAAAGG…
chr2	113148996	113148997	262	3	B6xCAST	AACTGCAACCCTATAGGTGGAACAACAATATGAACTAACCGGAGCTCTTGTCTTTAGCTGCATATGTATCAAAAGATGGCCTAGTCGGCCATCACTGCAAAGAGAGGCCCATTGGACTTGCAAACTTTATATGCCCCAGTACAGGGGAACACCAGGGCCAAAAAGGGGGAGTGGGTGGGTAGGGGATTGGGGGGGTGGGTATGGGGGACCTTTGGGATAGCATTGAAAATGTAAACGAGGAAAATACCTAATTAAAAAAAAAAGAATTCTGCTTTTAAACTTCTGAGTCTCCTACTCAGTAGTGGATGGTGGTACACGTCTGCATACAGGCACTTGGGAGGAGAAAGCCAGAGAATCAGAAGTTCAAGGTCACCCTCAGCTATGTAGTGAGTGAACCTG…	GGAACTGCAACCCTATAGGTGGAACAACAATATGAACTAACCGGAGCTCTTGTCTTTAGCTGCATATGTATCAAAAGATGGCCTAGTCGGCCATCACTGCAAAGAGAGGCCCATTGGACTTGCAAACTTTATATGCCCCAGTACAGGGGAACACCAGGGCCAAAAAGGGGGAGTGGGTGGGTAGGGGATTGGGGGGGTGGGTATGGGGGACCTTTGGGATAGCATTGAAAATGTAAACGAGGAAAATACCTAATTAAAAAAAAAAGAATTCTGCTTTTAAACTTCTGAGTCTCCTACTCAGTAGTGGATGGTGGTACACGTCTGCATACAGGCACTTGGGAGGAGAAAGCCAGAGAATCAGAAGTTCAAGGTCACCCTCAGCTATGTAGTGAGTGAACC…
chr2	122161747	122161748	160.5	25	B6xCAST	TGTATTTTGTGTAGATATGTGGGCGTGCATACCAGAGCACATGTGTGGAAGTCAGAGGAAAATCTGCAGGATTAGGTTCACTCTTTCCACCATGTGGATCTCAGGGACTGAGTTTGGGTCGTCGGGCTTGGGAGCAAGCATCTTTTCCTGCTGAGCCATCTCACCAGCCCAGTTAAACGTCTTAAATTAACACCTTAAAACTAAAGTAAAGGAAGTTAGTATTCTAAACTTTAGTGTTGACAGACAAAAGAAAACATCGATTTACTTTAAGGAAGCCGGGTTTCCACGGAAACCCATCAAGGAATCTCAGTACATGGATCCGGATGCCGAGTGGGTCAGAACCCAGAGGTACAGATTTAGGATTTACTTCTGTGAGGCTGAACACGAAGTCAGGAAATT…	AAACATTTTTAGAAATCACATTTGTGTATTTTGTGTAGATGTGTGGAAGTCAGAGGAAAATCTGCAGGATTAGGTTCACTCTTTCCACCATGTGGATCTCAGGGACTGAGTTTGGGTCGTCGGGCTTGGGAGCAAGCATCTTTTCCTGCTGAGCCATCTCACCAGCCCAGTTAAACGTCTTAAATTAACACCTTAAAACTAAAGTAAAGGAAGTTAGTATTCTAAACTTTAGTGTTGACAGAGACAAAAGAAAACATCGATTTACTTTAAGGAAGCCGGGTTTCCACGGAAACCCATCAAGGAATCTCAGTACATGGATCCGGATGCCGAGTGGGTCAGAACCCAGAGGTACAGATTTAGGATTTACTTCTGTGAGGCTGAACACGAAGTCAGGAAATT…
chr2	125246118	125246119	115	21	B6xCAST	CTCTCTATCCATCTTCCTGACATCCTCTTACTCTGAACTTTTTTCCCCTGTGTTCACTTCCTGTCAACTTGTTGCTTGCTCTGCCTCTTGACCTCTGGTTGACTTCACTTAATCCTGTTTACAATGAACAGAAAGCTCTTGGATGAAAGGTCTGTGCTAGACCACACCACAACTAGAAACAGGTCTGTCCAGTAAATAACACAATCTGTGGGTTCATAGTGTGATGACATATCCTGCAATAAACAAAACGAAACACCAGGAGAGGTACTATATGGAAAGAAGTGGTTTGGTGTCAGGAAAATGGGGTAAGCAGTTAAGAACTGGAGAATTGTGGTCAAAGCATATACACATTTATATGCAAAACTGAAGAGAATATATGTTTATCTATCTGTTCCCGTG…	CTCTCTATCCATCCTCCTGACATCCTCTTACTCTGAACTTTTTCCCCCTGTGTTCACTTCCTGTCAACTTGTTGCTTGCTCTGCCTCTTGACCTCTGGTTGACTTCACTTAATCCTGTTTACAATGAACAGAAAGCTCTTGGATGAAAGGTCTGTGCTAGACCACACCACAACTAGAAACAGGTCTGTCCAGTAAATAACACAATCTGTGGGTTCATAGTGTGATGACATATCCTGCAATAAACAAAACGAAACACCAGGAGAGGTACTATATAGAAAGAAGTGGTTTGGTGTCAGGAAAATGGGGTAAGCAGTTAAGAACTGGAGAATTGTGGTCAAAGCATATACACATTTATATGCAAAACTGAAGAGAATATATGTTTATCTATCTGTTCCCGTG…
chr2	135637458	135637459	101	18	B6xCAST	GGCGTGGTGGTGCACGCCTTTAATTCCAGCACTTGGGAGGCAGAGGCAGGCGGATTTCTGAGTTCGAGGCCAGCCTGGTCTACAAAGTGAGTTCCAGGACAGCCGGGGCTATACAGAGAAACCCTGCTTCACAAAACCAAAACACAAAACAAAACAAAACAAAAAACCCAAACAAACAAAAAACCCCCAAAATAGAAGAAATTGGAATGTGTTGTCCCAATACATATTCATTAAAATAAAATGTAAAAATAAATTAAAAGAAAAATATATGTGTGGAAAGTTTACATTTTGCTTACAGTAGAAACTTCTCATCATTTATCCTTTCCAGGACATTGGTATTCTGTTTCTTTCTTTGTTTGTTTATTTTTCACTCTGAATATAATAAGTATCTGGAGGAGG…	GGCCAGGAGTGGTGGTGCACGCCTTTAATTCCAGCACTTGGGAGGCAGAGGCAGGCGGATTTCTGAGTTCGAGGCCAGCCTGGTCTACAAAGTGAGTTCCAGGACAGCCGGGGCTATACAGAGAAACCCTGCTTCACAAAACCAAAACACAAAACAAAACAAAAAAACCAAACAAACAAAAAACCCCCAAAATAGAAGAAATTGGAATGTGTTGTCCCAATACATATTCATTAAAATAAAATGTAAAAATAAATTAAAAGAAAAATATATGTGTGGAAAGTTTACATTTTGCTTACAGTAGAAACTTCTCATCATTTATCCTTTCCAGGACATTGGTATTCTGTTTCTTTCTTTGTTTGTTTATTTTTCACTCTGAATATAATAAGTATCTGGAGGAGG…
chr2	137696088	137696089	481	78	B6xCAST	GAGATGCTCATAGAAAGTATATTTTTCTTCCTTGGTTGCTGTGATTGAGAATATCTTCAGAACACCATACTCTGTATCCTCAATGTTTTCGGAACTAAGGGGCTGGGAGGACTTTGCTTTGCTAAGCATATACTATATATGTTTTAGAGCTCACTCATATTTGCTGCAATGAACTGTGCTTTAACACAGTTCTTTCCTGGTTGTCTAGGCTTGCTTCTTTGAGTTTTTCTGATTCCTTTACAACCAATTCCTAGTGAGCTCCCATCACCAACTTATCTGCAGTAGTCCCACTCTTACTCCTGTTTTCCCCACCTGGATGAAGTTTTCATCATCACAGAACCACTCGTTCTCACTGACTTCTGCTAAAGTCAGACATTCATACATTGCATTCTCAGAGAA…	TGCTCATAGAAAGTATATTTTTCTTTTTTGGTTGCTGTGATTGAGAATATCTTCAGAACACCATACTCTGTATACTCAATGTTTTCGGAACTAAGGGGCTGGGAGGACTTTGCTTTGCTAAGCATATACTATATATGTTTTAGAGCTCACTCATATTTGCTGCAATGAACTGTGCTTTAACACACTCAGTTCTTTCTTGGTTGTCTAGGCTTGCTTCTTTGAGTTTTTCTGATTCCTTTACAACCAATTCCTAGTGAGCTCCCATCACCAATTTATTTGCAGTAGTCCCACTCTTACTCCTGTTTTCCCCACCTGGATGAAGTTTTCATCATCACAGAACCACTCGTTCTCACTGACTTCTGCTAAAGTCAAACATTCATACATTGCATTCTCAGAGAA…
chr2	152317197	152317198	86	16	B6xCAST	ACTGCAGTACAGCTCGGGCTTTCTCCCTTACCAAGCCTAAAGGTATGGGGCCAAACCAGGCCAGTCCCTTGCCTAGCCCTGCTGTTCACTGCTATACATGTGGGGCTGGGTCAGTATGAGAGCCACCATCGTCGACTTAGTGGCAGTTTTGACAGCTTGGGTGGCATGGAATCCCATTGACCCGGCAGCGGCAGCCACCACTGGTGTCCCCTGGGCCCTAAAGGATAGAGAAAAGAGGATATCAGGTTGGTGAAAACAGGCTATGCCCCAAAGTCACTCTATCAGCCCAAGGCAGGGCCCATCTAAAGGTGCAGTGAGGTAGCCATGAAGGCCTTTAACCCCCATCCCAACCTCTCCAGCACCCTTAAACTCCATGGTCTTCCCCAGGCCAGAAAGAGA…	TGCAGTACAGCTCGGGCTTTCTCCCTTACCAAGCCTAAAGGTATGGTGGCCAAACCAGGCCAGTCCCTGGCCTAGCCCTGCTGTTCACTGCTATACATGTGGGGCTGGGTCAGTATGAGAGCCACCATCGTCGACTTAGTGGCAGTTTTGACAGCTTGGGTGGCATGGAATCCCATTGACCCGGCAGCGGCAGCCACCACTGGTGTCCCCTGGGCCCTAAAGGATAGAGAAAAGAGGATATCAGGTTGGCTAAAAACAGGCTATGCCCCAAAGTCACTCTATCAGCCCAAGGCAGGGCCCATCTAAAGGTGCAGTGAGGTAGCCATGAAGGCCTTTAACCCCCATCCCAACCTCTCCAGCACCCTTAAACTCCATGGTCTTCCCCAGGCCAGAAAGAGA…
chr2	155031803	155031804	143.5	16.5	B6xCAST	CTATTCTTCTTGTATGTGTATGTGTGTGGTGTTTGTTTGATGAGACAGGGTGCCCCTGTGTAGCCCTGGCTAGCCTGGAACTCACTATATAGACCAGTATGGCCTTCAACTCACAGAGATCTACCTGCCTCTACCTCCTAATGTAAAAGTGTCAGCCATCACCCGACAAGGCATCTCCCCTTAAGGTTTCTGAGGGAAAGTGAGATCTTGCATTTGGGGGAAACAGGCTGCGTTACCATGTGACTGTACCCCATAATAGAAGATGAAAAGAGGGTCATATGTGACTTGGGCAACATGGTAGGCGTCATTCTTTTTCTGGGTAAGGGGTGTGGGGTTTGATTAATGTGTGATCCAGGCTATGTCAGCTGCCTTTGACTTGAAGGCAGCAAAGGCATTCAG…	TATTCTTCTTGTATGTGTATGTGTGTGGTGTTTGTTTGATAAGACAGGGTGCCCCTGTGTAGCCCTGGCTAGCCTGGAACTCACTATATAGACCAGTATGGCCTTCAACTCACAGAGATCTACCTGCCTCTACCTCCTAATGTAAAAGTGTCAGCCATCACCCGACAAGGCATCTCCCCTTAAGGTTTCTGAGGGAAAGTGAGATCTTGCATTTGGGGGAAACAGGCTGCGTTACCATGTGACTGTACCCCATAAGAGAAGATGAAAAGAGGGTCATATGTGACTTGGGCAACATGGTAGGCATCATTCTTTTTCTGGGTAAGGGGTGTGGGGTTTGATTAATGTGTGATCCAGGCTATGTCAGTTGCCTTTGACTTGAAGGCAGCAAAGGCATTCGGT…
chr2	164521012	164521013	135	24	B6xCAST	TCTTTCTTTCTTTCTTTCTTTCTTTCTTTCTTTCTTTCTTTCTTTCTTCTCCTCTTGCTCTTCTTCCTCCCCCTGAGACAAGGTTTCTTTATGTAGCCCAGGCTGTCTTGGAACTTGCTCTGTAGACCAGGCTAACCTTAAACTCAGAGATCTGCCTGCTGCTGCCTCCCGAGTGCTAGAATTAAAGGCAAGTGCCTCCATGCCCACATCTGCAAGGTCAGAACCTGCATGGAAAGAGACCTCAGAGGACTCTTACACATCTGTGAAGTAAGTGCTTCTGCTGAGCCTTTTGACCCCAGCAGCCAGAAGCCTGAGCCAATGAAGAGCCAGGCAACAGATGTGACCCTGCCTCCTCTCCTTCCTCACTCCTCCCCAGTCACACCAGTTCCCCTCAGCTTA…	TCTTTCTTTCTTTCTTTCTTTCTTTCTTTCTTTCTTTCTTTCTTTCTTCTCCTCTTGCTCTTCTTCCTCCCCCTGAGACAAGGTTTCTTTATGTAGCCCAGGCTGTCTTGGAACTTGCTCTGTAGACCAGGCTAACCTTAAACTCAGAGATCTGCCTGCTGCTGCCTCCCGAGTGCTAGAATTAAAGGCAAGTGCCTCCATGCCCACATCTGCAAGGTCAGAACCTGCATGGAAAGAGACCTCAGAGGACTCTTACACATCTGTGAAGTAAGTGCTTCTGCTGAGCCTTTTGACCCCAGCAGCCAGAAGCCTGAGCCAATGAAGAGCCAGGCAACAGATGTGACCCTGCCTCCTCTCCTTCCTCACTCCTCCCCAGTCACACCAGTTCCCCTCAGCTTA…
chr2	166073158	166073159	629	106.5	B6xCAST	AACGCTTTCTCTCTAAACTGTGCCCCTGTCATTAACAGGCCTACCCGGTTCATCAGCATTAGATGCTGAGGTGGGTCGGGGCCAGAGGCAGTGGGTACTAGGGCACATAATTGGCTTGATTCAGGGGTAGGTGCAGCTGGACTGTGCAGAGAGTTTCCAGTTTACAACACGCCAGTCCAGTCCCTTTCTATCTGCAGTAGAGTGTTACCAGGAGCAGACCTCTAGGTGAGCTCGAATCTGGCCCTGCCATGAAGCAACAGGTGTGTTTACCTCCAGTGCAGGCGATTAAAAACAGGGCGGTGTTTTGTTTTTCTCTTGCCTCCTCCCTTTTTCTCTTCTTTTGAAAATAAGGAGTTCTGAAGAAGACGGAAATGTCACTCCAAGAGCAGTAAATTCTCA…	AACGCTTTCTCTCTAAACTGTGCCCCTGTCATTAACAGGCCTACCCGGTTCATCAGCATTAGATGCTGAGGTGGGTCGGGGCCAGAGGCAGTGGGTACTAGGGCACATAATTGGCTTGATTCAGGGGTAGGTGCAGCTGGACTGCGCAGAGAGTTTCCAGTTGACAACACGCCAGTCCAGTCCCTTTCTATCTGCAGTAGAGTGTTACCAGGAGCAGACCTCTAGGTGAGCTCGAATCTGGCCCTGCCATGAAGCAACAGGTGTATTTACCTCCAGTGCAGGCGATTAAAAACAGGGCGGTGTTTTGTTTTTCTCTTGCCTCCTCCCTTTTTCTCTTCTTTTGAAAATAAGGAGTTCTGAAGAAGACTGAAATGTCACTCCAAGAGCAGTAAATTCTCA…
chr2	170826321	170826322	405.5	54	B6xCAST	TGCGGCTATCCCTTGTGCTCAGAGTCTATAGAGGCTGACGCTGGTGAACCCAAAGAGAGCATTTACTCAGTCTGTGGGGGCCCAGTGTCTAATTTGGGGGGCCCAGTGTCTGGTTTAGGAGCCTTCCTCTGAGGATCTATCTAATGGGGATTAATCACCCCCAGCTCCCCTCCCCAGTTATGAAACATTCAGAATGTGGGGCCTCACTGGAGGAAGTTTCTTACTCGAGGGGGGCGGGCTTTGAGGTTCAACAGACTGGCGGTACTTCCTGTTCTTTCTCTGATTCTGGACTGCCAAAGCGATGCTATGGGATGGCCTCATTTTTCCTCCACGCCTTCCTCCCATAGCGGTCAGTATCCCTTCTGTGACCATGAGCCATAACAAGTCTTTTCTCCCTTA…	TGCGGCTATCCCTTGTGCTCAGAGTCTATAGAGGCTGACGCTGGTGAACCCAAAGAGAGCATTTACTCAGTCTGTGGGGGCCCAGTGTCTAATTTGGGGGGCCCAGTGTCTGGTTTAGGAGCCTTCCTCTGAGGATCTATCTAATGGGGATTAATCACCCCCAGCTCCCCTCCCCAGTTATGAAACATTCAGAATGTGGGGCCTCACTGGAGGAAGTTTCTTACTCGAGGGGGGCGGGCTTTGAGGTTCAACAGACTGGCGGTACTTCCTGTTCTTTCTCTGATTCTGGACTGCTAAAGCGATGCTATGGGATGGCCTCATTTTTCCTCCACGCCTTCCTCCCATAGCGGTCAGTATCCCTTCTGTGACCATGAGCCATAACAAGTCTTTTCTCCCTTA…
chr2	172413453	172413454	235	14	B6xCAST	CTCCATCTCCCTCTCTCTCTGTCTCCCTCTCTCTCTCCCTCTCTCTTATTTTTGAGACAGGATTTCTCACCTCAGAGCCCACTTCTAGGACGTACAATGTGTCCCATGGTGGCTTCAAACTAACAGTAATCCTTCTGCCTCAGACCCCTAAGTAATAAATAGAATTACTAATAAGTAGCTTTCAACAAGGTAAAATTGTGACTCTCCTACAGAAATAGAACAAGTTGCCAGGTGTAGTGGCTCACACACTGTCCCTGAACTCTGTGGAGACAGGAGGATCAGAAGTTTAAGGTCAGCCTAGACGGCAGAGAAGCAAAGTTTGAAAGCCAAACAAAACCTCTAGAAAGGATCCCGTTGCTTTACCAAGTCTGAGCCTTTAGTCAACACGCAACAAGAGTC…	CTCCATCTCCCTCTCTCTCTGTCTCCCTCTCTCTCTCCCTCTCTCTTCTTTTTGAGACAGGATTTCTCACCTCAGAGCCCACTTCTAGGACGTACAATGTGTCCCATGGTGGCTTCAAACTAACAGTAACCCTTCTGCCTCAGACCCCTAAATAATAAATAGAATTACTAATAAGTAGCTTTCAACAAGGTAAAATTGTGACTCTCCTACAGAAATAGAACAAGTTGCCAGGTGTAGCGGCTCACACACTGTCCCTGAACTCTGTGGAGACAGGAGGATCAGAAGTTTAAGGTCTGCCTAGACGGCAGAGAAGCAAAGTTTGAAAGCCAAACAAAACCTCTAGAAAGGATCCCGTTGCTTTACCAAGTCTGAGCCTTTAGTCAACACGCAACAAGAGTC…
chr3	36387650	36387651	413.5	78	B6xCAST	CACTCTCTGAGAACCACCTTCCCATGTTTCATTAAGTATTTTATTTTGTGCACATGACTCATTTATCATTTCCAAGTCATCTCTATAGTCTGTTGGTCTGATAGATTAACTGAATGACATTGTGTGTGATCTTTTAAAATTATTTTTTTTCACTTAACATAATGCCCTTTTGTTCCACTCAAGTTGGCTCATGAATTAATACTCTATTTCTTTATAGATGAGTAGTATTATGCTATAGACACACAGTACAGTTTTTAACTTACCCTTTTGAGAGACATTTGAGTACTTTCTGGTCTGGGGTTCTCATGACTAATACTACTAAGAGTATCTCTTTATATACAAGTTTCCACCATAGACCAAACGTGTTTTTTGGTTTTTGTAGAATAAATTCTCAGAAGT…	AGCACTCTCCGAGAACCACCTTCCCATGTTTCATTAAGTATTTTATTTTGTGCACATGACTCATTTATCATTTCCAAGTCATCTCTGCAGTCTGTTGGTCTGATAGATTAACTGAATGACATTGTGTGTGATCTTTTAAAATTATTTTTTTTCACTTAACATAATGCCCTTTTGTTCCACTCAAGTTGGCTCATGAATTAATACTTTATTTCTTTATAGATGAGTAGAATTATGCTATAGACACACAGTGCAGTTTTTAACTTACCCTTTTGAGAGACATTTGAGTACTTTCCGGTCTGGAGTTCTCATGACTAATACTACTAAGAGTATCTCTTTATATACAAGTTTCCACCATAGACCAAACGTGTTTTTTAGTTTTTGTAGAATAAATTCTCAGAA…
chr3	37330150	37330151	2468	208	B6xCAST	GGATCTCTGTGAGTTTGAGGCCAGCCTGATTTACAAAGTGAGTCCAGGACCCCCAAAGCTCTTTTACACACAGAAACCCTGTCTGGAAAAACAAAAACAAAATCTCATTAAAAGAAACAGTTTGGGCTCTAGAGAGATAGCTCAGTGGGCAAAATGTTTGCTGGGTAAGCAGGAACACCTGCGTTTGGATCCTTGGCACCCATGGAAAGGCCAAGCACGGGGTGCATCTAACACCAGTGCTGTGCTGGGGGAAAGGAAGGAGCCACAGAGAGAGGACTGGGACTCCAGCTGTCTAACCTAGCCAGTGAGGGGAACAGAGGAAGGGGCCATATGGCTCCCTATTCTTCACATATCACACACACAAGGACTCATACACATAAAATAAAAATCACAAATCAA…	GGATCTCTGTGAGTTTGAGGCCAGCCTGATCTACAAAGTGAGTCCAGGACCCCCAAAGCTCTTTTACACACAGAAACCCTGTCTGGAAAAACAAAAACAAAATCTCATTAAAAGAAACAGTTTGGGCTCTAGAGAGATAGCTCAGTGGGCAAAATGTTTGCTGGGTAAGCAGGAACACCTGCGTTTGGATCCTTGGCACCCATGGAAAGGCCAAGCACGGGGTGCATCTAACACCAGTGCTGTGCTGGGGGAAAGGAAGGGGCCACAGAGAGAGGACTGGGACTCCAGCTGTCTAACCTAGCCAGTGAGGGGAACAGAGGAAGGGGCCATATGGCTCCCTATTCTTCACATATCACACACACAAGGACTCATACACATAAAATAAAAATCACAAATCAA…
chr3	37346682	37346683	725	81.5	B6xCAST	CAGTTTAATGTTCTTCCTCTCCCTGCAGATGCCCAGGGGCCGGGGTCCCTGGAGTACAACACAGTCTGGCAGTTAACACGGTGTATGCATGTGCCAGGGAGGGGGAATCACCTCAAAAGACAAAGTGTAGGGGACACACTGCAGGCTAACTTACATTTTTCACTTCTTTCTCCAGTTCTCAGTCCATGTAGGAAATCATTAAAAACAAACCAGCGATAGTCCATTGTAGAATTCTATCTGGTAATGGCAGGCTCATAAACCTTCAGTGAGTTACTATACTCACTAATACTTACTACATGAATCACTTCATTAAATGTGCTCCTATTGGTAAACATGCACATTTCAGCTTGTTTGCAACCATAAGCAATTTAGTATGGAAGTCTGGAGTTTCTTAGTTAG…	AGTTTAATGCTCTTCCTCTCCCTGCAGATGCCCAGGGGCCGGGGTCCCTGGAATACAACACAGTCTGGCAGTTAACACGGTGTATGCATGTGCCAGGGAGGGGGGATCACCTCAAAAGACAAAGTGTAGGGGACACACTGCAGGCTAACTTACATTTTTCACTTCTTTCTCCAGTTCTCAGTCCATGTAGGAAATCATTAAAAACAAACCAGCGATAGTCCATTGTAGAATTCTATCTGGTAATGGCAGGCTCATAAACCTTCAGTGAGTTACTATACTCACTAATACTTACTACATGAATCACTTCATTAAATGTGCTCCTATTGGTAAACATGCACATTTCAGCTTGTTTGCAACCATAAGCAATTTAGTATGGAAGTCTGGAGTTTCTTAGTTAGC…
chr3	37787027	37787028	102	9.5	B6xCAST	ATGTACATATATAATTTTTATAATTTTAAGAGTTTCATACATGTATCATGTGTATTTTGATCATATTTGCTGCCCATACTTCCTCCTAACTTTTCCCAGATCCACCTCCTACCCACTCCCAACTTGACGTCATTATTTATTTATTTATTTATTTATTTATTTATTTATTATAACCAAGGCGATTCTCACAACAGAAAGGAAAGTGTACACGGAAGCTCAGCTCTAAGCGAAGGCCTTTGCTCCCTGATTTCTGAAAAGACCAGGCACAGAGAAGTGACCTGCGCACATCAGGACCCCCGGGGAAGTTTAGCTGAAGAGCCAAGTCAGCTCTTGAGGAGCCTGGTGGTTTGAATGAAAGATGTCCCCTAGGGGCTTAGGTGTACTTGTTCTTGTTTGGTG…	ATGTACATATATAATTTTTATAATTTTAAGAGTTTCATACATGTATCATGTGTATTTTGATCATATTTGCTGCCCATACTTCCTCCTAACTTTTCCCAGATCCACCTCCTACCCACTCCCAACTTGACGTCATTATTTATTTATTTATTTATTTATTTATTTATTTATTATAACCAAGGCGATTCTCACAACAGAAAGGAAAGTGTACACGGAAGCTCAGCTCTAAGCGAAGGCCTTTGCTCCCTGATTTCTGAAAAGACCAGGCACAGAGAAGTGACCTGCGCACATCAGGACCCCCGGGGAAGTTTAGCTGAAGAGCCAAGTCAGCTCTTGAGGAGCCTGGTGGTTTGAATGAAAGATGTCCCCTAGGGGCTTAGGTGTACTTGTTCTTGTTTGGTG…
chr3	46370534	46370535	337.5	16	B6xCAST	TGGTAACAGCAGAGAGCAGTCTTTAGTAACTATTTTCATGTAAGAACAGAGAGGTGACATAGTACTGGGGTTAAAATAATTTCTTACAAACTTTTAAAATGTATGTAAGTAAAGCATCTAGCTCTTTCTCTAATATCTCTCTTGACATTGTCATCTCCAATTCTACCAGTAGCTAGAACAAAGTACTAACTTTTTATATGCTTATACATCATCTTTTATTTCTAGCATCTTTGTTTCCTTTCTTAGCAATTCCATGCCCTCATATACTCTCCTTCTAATTTCTAGATCCTATATAAGACTTTCTCCTATTAAATAAACCCATTTATCATGTGCTTCGTTTTATAGATTCCTTTTTTTCCTTTCTATCCCTTTTCTTCTTGAGACTACTTTAATTCTTTA…	CTGGTAACAGCAGAGAGCAGTCTTTAGTAACTATTTTCATGTAAGAACAGAGAGGTGAAGAGTACTGGGGTTAAAATAATTTCTTACAAACTTTTAAAATTTATGTAAGTAAAGCATCTAGCTCTTTCTCTAATATCTCTCTAGACATTGTCATTTCCAATCCTTCCAATAGCTAGAACAAAGTACTAACTTTTTATATGCTTATACATCACCTTTTATTTCTAGCATCTTTGTTTCCTCTCTTAGCAATTCCATGCCCTCATATACTCTCCTTCTAATTTCTAGATCCCATATAAGACTTTCTCCTATTAAATAAACCCATTTATCATGTGCTTCGTTTTATAGATTCCTTTCTTTCCTATCCATCCCTTTACTTCTTGAGACTACTTTAATTCTCTA…
chr3	49849324	49849325	457.5	78	B6xCAST	TAACACTCTTTATTTATAAACATGTTGAAGGCAAGTTGGATTTAATACACCCATCTCCAGAGTAAACTTTCCTCACAGATTAAATTAGATAAAAATTACCACAGGTAGGTATAAGGTTTGTATTTACTAATAAATGCTCTTTTAGGAAGGCATGAGCCTGTGTGTTTGAGATACATTGGAGAAGACAGAAATTGAGAAAAGTGAAAAATGTTGAGAATATGTTGAAACCACATCATCAAAATGAGTTAAGAGATGTTAAGCAACATGTTTTCCTTAGTACATCCTTCAACATGGAGAAAAATGAATAAATCCAGCAGAAGGAAAGAAAGGAAAATGAAAAAGGAGAGAGAGAGATACAGAGAGAGACAGAGAGACAGAGAGAGGAAAAGAGGGAGAGAG…	TAACACTCTTTATTTATAAACATGTTGAAGGCGAGTTGGATTTAATACACCCATCTCCAGAGTAAAATTTCCTCACAGATTAAATTAGATAAAAATTACCACAGGTAGGTATAAGGTTTATATTTACTAATAAATACTCTTTTAGGAAGGCATGAGCCTGTGTGTTTGAGATACATTGGAGAAGACAGAAATTGAGAAAAGTGAAAAATGTTGAGAATATGTTGAAAGCACATCATCAAAATGAGTTAAGAGATGTTAAGTGACATGTTTTCCTTAGTACATCCTTCAACATGGAGAAAAGTGAACAAATCCAGCAGAAGGAAAGAAAGGAAAATGAAAAAGGAGAGAGAGATACAGAGAGAGACAGAGAGACAGAGAGAGGAAAAGAGGGAGTGAGGA…
chr3	57292962	57292963	419.5	77.5	B6xCAST	GATTCAGAGATTCACTAGTACTTTCTAGCAATGAGACCTTGGACAAATCACTTCATCCTTCCCTGCCTCCTTTTCTCATTTGTAAAAGAAAAGGAATTATGGGAGCATCTCCATACGGTCGTGGTAAGAACAAAATCAGTGAATATATGCAATAGTATATTCACTGATTAGAATTTCCCCAGGTTCATGACTGCCCATCTAGCCTTACATACTGCATGATTTGGAGTAAGGAAATATTGGATGGGTGGATAGATAGATAACTTAGTTTTAAGCATTGTGGTTAAGAATGTGTTACTAGTTAAAGAACAGTTACATACTGTCCCTCAGTGCTGGCAAAGGTGTAGTTCCATACTCCATGGGCATCGCTGCACTTTGGTCCTTCTGCCAAACCCAGTGATG…	GATTCAAAGATTCACTAGTACTTTCTAGCAATGAGACCTTGGACAAATCACTTCATCCTTCCCTGCCTCCTTTTCTCATTTGTAAAAGAAAAGGAATTATGGGAGCATCTCCATACGGTCGTGGTAAGAACAAAATCAGTGAATATATGCAATAGTATATTCACTGATTAGAATTTCCCCAGGTTCATGACTGCCCATCTATCCTTACATACTGCATGATTTGGAGTAAGGAAATATTGGACGGGTGGATAGATAGATAACTTAGTTTTAAGTATTGTGGTTAAGAATGTGTTACTAGGTAAAGAACAGTTACATACTGTCCCTCAGTGCTGGCAAAGGTGTAGTTCCATACTCCATGGGCATCGCTGCACTTTGGTCCTTCTGCCAAACCCAGTGATG…
chr3	65482430	65482431	363	24	B6xCAST	TCATCCTTAAGTACACAACAACTCTGAGACCATCTTGAGCTAGATGAACCTCCACTTCAAAATAAAATTCAGATTCCAGCTCCCATGACAACCCACTGAGTAAGGATTCCCAGGGATGTAGTGTTGAACACCTATGCTGTTGATTCTGCACTGCGTCTAGAAGCAGACAGCTGAAATCAGTCCTTGGAGGGTTTGTTTGTTTGTTTGTTTGTTTGTTTGCTTGTAACAGCTGAAATAGCTGTATGGAGATTGGGAATTTACGCACCAACTTATTCTGACAGTTAGGTACTGTTCATGGGGTAATTTCATGGTGATGAATGATCCAAAATAAACTAAAGGGAGAGACACAGAGCTTGCCTGGGTGGCAGAGGCTTGGAGACTATGGCAGGCCACTTGGTC…	CAGTTCATCCTTAAGTACACAACAACTCTGAGACCATCTTGAGCTAGATGAACCTCCACTTCAAAATAAAATTCAGATTCCAGCTCCCATGACAACCCACTGAGTAAGGATTCCCAGGGATGTAGTGTTGAACACCTATGCTGTTGATTCTGCACTGCATCTAGAAGCAGACAGCTGAAATCAGTCCTTGGAGGGTTTGTTTGTTTGTTTGTTTGTTTGCCTGTAACAGCTGAAATAGCTGTATGGAGATTGGGAATTTACGCACCAACTTATTCTGACAGTTAGGTACTGTTCATGGGGTAATTTCATGGTGATGAATGATCCAAAATAAACTAAAGGGAGAGACGCAGAGCTTGCCTGGGTGGCAGAGGCTTGGAGACTATGGCAGGCCACTTGGTC…
chr3	67768771	67768772	776.5	24	B6xCAST	TATGCTTGCTTGATCCTCATTTATTTACTCCTTCCTGGAAACAGTCTATTCTCCACTCCAGGATTCTTATGCATCTTGAGGGGGACCAAGTCAGGGGACTGTCACCTAAAGTGTTGGTGCTCATGTAGGAAAGGGTGGACAGTTGATATGGTATCTATAATAGGATGTCACAGTCACAAGATGTGTCACCTCAAAGGTGAAGATAGACTCTAGAGCCTAGAAACCTGAGATCAAGGGTTGGAAGAGTTGATTCATTTTTGTAGACCATGGAGGTGGGAAGGGGGTTGAGGGACAAACAGAGAACATGCTCCAGTTTTTGCCTCTATCATCTGGGGGTTTTGCTGGAATTCTTGAGTGGATATTTCACCCCGCCCATATATCCTCTGTATTCCCACAGCC…	TATGCTTGCTTGATCCTCATTTATTTACTCCTTCCTGGAAACAGTCTATTCTCCACTCCAGGATTCTTATGCATCTTGAGGGGGACCAAGTCAGGGGACTGTCACCTAAAGTGTTGGTGCTCATATAGGAAAGGGTGGACAGTTGATATGGTATCTATAACAGGATGTCACAGTCACAAGATGTGTCACCTCAAAGGTGAAGATAGACTCTAGAGCCTAGAAACCTGAGATCAATGGTTGGAAGAGTTGATTCATTTTTGTAGACCATGGAGGTGGGAAGGGGGTTGAGGGACAAACAGAGAACATGCTCCAGTTTTTGCCTCTATCATCTGGGGGTTTTGCTGGAATTCTTGAGTGGACATTTCACCCCGCCCATATATCCTCTGTATTCCCACAACC…
chr3	67961002	67961003	235	22.5	B6xCAST	GCTTTTCCTGACTTGGATCCATTTGTCTAACATGCCCAACATGTCTAACCCTAACAACACCCCTTCTTCCACCTTTTCCTCCATTTCATCCCTTCAAATCAGTAGTTCTAAACCTGTGGTAGTGACCCTTTTGTGGGTAAGGGTTGCAAATCAGATACCCTGAATATCAGGTAGTTCCATTACTATTCACAAAAGTAGCAAAATTACAGTCACGAAGTAGCAACAAAAATAATGTTATGGTTGGGGGGGGGGTGGTCACCACAACATGAAGAACTGTATTAAAGGGTCACAGCATCAGGAAGATTGAGATCCACTGCTTTAAATGAAGGTGAGTTCTCATCTCCACTCCCCAGTGGTTGGAGTATCACTGCCATGCACCCCCCCCACCAGCCTGAATGC…	TTTCCTGACTTGGATCCATTTGTCTAACATGCCCAACATGTCTAACCCTAACAACACCCCTTCTTCCACCTTTTCCTCCATTTCATCCCTTCAAATCAGTACTTCTAAACCTGTGGTAGTGACCCTTTTGTGGGTAAGGGTTGCAAATCAGATACCCTGAATATCAGGTAGTTCCATTACTATTCACAAAAGTAGCAAAATTACAGTCACGAAGTAGCAACAAAAATAATGTTATGGTTGGGGGGGGGGTGGTCACCACAACATGAAGAACTGTATTAAAGGGTCACAGCATCAGGAAGGTTGAGATCCACTGCTTTAAATGAAGGTGAGTTCTCATCTCCACTCCCCAGTGGTTGGAGTATCACTGCCATGCACCCCCCCCCCCACCAGCCTGAATGC…
chr3	80883797	80883798	435.5	39	B6xCAST	TTCATAGGCATGAAGTCTGGTTTTTTTAAACCCACATAAAAACAGTATCATTTGTGTACCTTACCAATATTAAAATTACATAAAAATACTTACTATTAATTTGGGGGAGGATTAGATGGCTGCAGCTGCTTTCTCTATAAAACAAGGTACAATGTGCACACAGAATATTTGATTGTTTATATAATCACACACATAATTTGCAAAGTGTGATATTAGTGATTTTAAGTGAAACCTAATTCGACTAACTGCTTCAGTAGTCGAATGTTCATATTTTGAATGGTTTAGCCATTTGAATATTTTCGCTCAGTCTATTAACAGTTCCAACGTATTATGAAATAAGATTCACTTCTTAGCTTTATGATATTAAGAAAATAACTCACTCAGCCGAAGTAATCAAAT…	TTCATAGGCATGAAGTCTGGTTTTTTTAAACCCACATAAAAACAGTATCATTTGTGTACCTTACCAATATTAAAATTACATAAAAATACTTTCTATTAATTTGGGGGAGGATTAGATGGCTGCAGCTGCTTTCTCTATAAAACAAGGTACAATGTGCACACAGAATATTTGATTGTTTATATAATCACACACATAATTTGCAAAGTGTGATATTAGTGATTTTAAGTGAAACCTAATTCGACTAACTGCTTCAGTAGTCGAATGTTCATATTTTGAATGGTTTAGCCGTTTGAATAATTTTGCTCAGTCTATTAACAGTTCCAATGTATTACGAAATAAGATTCACTTCTTAGCTTTATGATATTAAGAAAATAACTCACTCAGCCGAAGTAATCAAAT…
chr3	84696698	84696699	322	61	B6xCAST	GAGGACAGGGTGACTGTCCAGTCTGGACAAACAGTCACTGCCATGAGGTTGAGGGATTTGAGCTGAATCTGTCCCCATTCTGCTGGCAGTGAGCCCGTTGGGTGCTTTCTTGAGGAAAATACAGCCGTGCTTTGTTTAGTTTTACAGTTTGTCCTCCTGTTCCTGTATATGCTTGTGGAAAGGTGTTCCATGTTCTTCCCGTGTTTATATAACACTCCTAGACAAATTACTCTTTAATGTCACTGTCAGAAATAAGTTGCTAAGACTGCACGTGCGCACATCGAGGCAAGCGGGAAGGTTGAAAGCGGAGCTGCCTGCGTGTTTGTTGTGGCTCCGTGGCAGTGCGCCAAGGTATTTTAACAGGGAACTCCAGGATTTGCTAGAGTTAAAAATGCATGG…	AGGACAGGGTGACTGTCCAGTCTGGACAAACAGTCACTGCCATGAGGTTGAGGGATTTGAGCTGAATCTGTCCCCATTCTGCTGGCAGCGAGCCCGTTGGGTGCTTTCTTGAGGAAAATACAGCCGCGCTTTGTTTAGTTTTACAGTTTGTCCTCCTGTTCCTGTATATGCTTGTGGAAAGGTGTTCCATGTTCTTCCCGTGTTTATATAACACTCCTAGACAAATTACTCTTTAATGTCACTGTCAGAAATAAGTTGCTAAGACTGCACGTGCGCACATCGAGGCAAGCGGGAAGGTTGAAAGCGGAGCCGCCTGCGTGTTTGTTGTGGCTCTGTGGCAGTGCGCCAAGGTATTTTTAACAGGGAACTCCAGGATTTGCTAGAGTTAAAAATGCATGG…
chr3	85660461	85660462	74	11	B6xCAST	ACCTGTATGCATCTCCGTCCCAGCTGCTGACATGGGCTGAACAGTGCTTATTTCTCTACAAGGGCAACATATTAGTAAAATAAGAACCAGAGTTTCTCAAGTTACAGTTAGCAGAATTTTTATCTTTTGCACCCATTCCAAGCTCTGCACACCCTCAACCCCCCCCCAAAAAAATCCTCTTTGCGTTACAAGTTAACGTTTGTTTTCATAAAATACTTAAACAATAATGTTTTTAACATAAGTATATGACACCACACTTTTTTCCATCTGATCAAATGCCTAAGATCCAAAGTTTGCATAGGTATGCTTCCTTTTGTGCAAATCTTACTGAATTAAGGCTGTCTTGAGTTTTGGTTGTGCTCCAATGATTAGAACAGCTCTCAAGCAACAAGAAAAAAA…	TGTGACCTGTATGCATCTCCGTCCCAGCTGCCGACATGGGCTGAACAGTGCTTATTTCTCTACAAGGGCAACATATTAGTAAAATAAGAACCAGAGTTTCTCAAGTTACAGTTAGCAGAATTTTTATCTTTTGCACCCATTCCAAGCTCTGCACACCCTCAACCCCCCCCCAAATCCTCTTTGCGTTACAAGTTAACGTTTGTTTTCATAAAATACTTAAACAATAATGTTTTTAACATAAGTATATGACACCACACTTTTTTCCATCTGATCAAATGCCTAAGATCCAAAGTTTGCATAGGTATGCTTCCTTTTGTGCAAATCTTACTGAATTAAGGCTGTCTTGAGTTTTGGTTGTGCTCCAATGATTAGAACAGCTCTCAAGCAACAAGAAAAAAA…
chr3	87391082	87391083	175	17.5	B6xCAST	TATAAAAGGAACTAAATTAAAACTGAGGTAATGTCTTGTGTTATGAAAAAGTCCTAATTCATAACTCCTGGATAATTCAAGATATCCATGGAGAGAGTGCAACAGTTAAGAGCCTCACTGCTCTTATAGAAGACCAGAATTCAGTTCTCAGCACCTTCATTGGGCAGCTCACAACCAGCCGCATCTCCAGCGTCAGGGGATCCAGTGGCTGCTTCTGCTCCCCATGGGACCTGCACTCATGTGCACACACTCACATATAAACACACACATAGATAGATATGTACAGTTTTTTAAAATTCTAAAGGACATCCATGATGCTACAAAGGTACTTTCTGAAAATTGTACTCTGGCTTTGCTCCACCAAGCAGAACTCAAGTTCTCTGTGGACTCTGGGAGCAC…	ATAAAAGGAACTAAATTAAAACTGAGGTAATGTCTTGTGTTATGAAAAAGTCCTAATTCATAACTCCTGGATAATTCAAGATATCCATGGAGAGAGTGCAACAGTTAAGAGCCTCACTGCTCTTATAGAAGACCAGAATTCAGTTCTCAGCACCTTCATTGGGCAGCTCACAACCAGCCGCATCTCCAGTGTCAGGGGATCCAGTGGCTGCTTCTGCTCCCCATGGGACCTGCACTCATGTGCACACACTCACATATAAACACACACATAGATAGATATGTACAGTTTTTAAAAATTCTAAAGGACATCCATGATGCTACAAAGGTACTTTCTGAAAATTGTACTCTGGCTTTGCTCCACCAAGCAGAACTCAAGTCCTCTGTGGACTCTGGGAGCACA…
chr3	92461387	92461388	159.5	14.5	B6xCAST	CACAAGCTCTGAGGGTACTGGTTAGTTCATATTGCTGTTCCACCTATAGGGCTTCAGCTCCTTGGGTACACATTTCAGGAGTTTTTTTATTTTGATAGGTATTTCAGAGATATTTTAACATGATGTCTCCAACCAACAATCATAGAAAATCTTTCCATGTATTTGTATTCTTTTCAGTTTCTTCTATCAGTGTTTCATAGTTTCTATTTTAGACATTGTAAATATAACTTTTATTCATCTGAAAGATTATTGACTTGGGGCCCTATTGTTTCTGTTTGCTAACCTAAGCCTATTCCTGAAACCTTCTAGTCTCTGTAGAATCTTATCTAGACCTAGAATAGTTTTAGCCTCTGAGAAACACTACTGAATAAGCTCACCCCTTCCTGGTTCTTTTTGAAC…	ACACGAGCTCTGGGGGTACTGGTTAGTTCATATTGCTTTTCCACCTATAGGGCTTCAGCTCCTTGGGTACACATTTCAGGAGTTTTTTTATTTTGATAGGTATTTCAGAGATATTTTAACATGATGTCTCCAACCATCAATCATAGAAAGTCTTTCCATGTATTTGTATTCTTTTCAGTTTCTTCTATCAGTGTTTCATAGTTTCTATTTTAGACATTGTAAATATAACTTTCATTCATCTGAAAGATTATTGACTTGGGGCCTTATTGTTTCTGTTTGCTAACCTAAGCCTATTCCTGAAACCTTCTAGTCTCTGTAGAATCTTATCTAGACCTAGAATAGTTTTAGCCTCTGAGAAACACTACTGAATAAGCTCACCCCTTCGTGGTTCTTTTTGAA…
chr3	100679406	100679407	204.5	20.5	B6xCAST	GAATCCAGAACCTCAGGAATTCATTTACAGCATATGAGGAGGAGTTGGCTAGTTTTGGGGGGTCGGGGGGGGGTCTCTGTTGGCAAGCAGTCTCCAGCTGTAACCATGTAGTTGCTAGCTTTCATACACCCTGATCACTTATCAGTAAACAGTCAAACTTTGCTTTTCTGAGCCTGAACCGCATGGGAACAGGTTTGCCGATTTCCCATGGGTCTACTCAGAGTCCTTGGCAAGACTGGGCCCATGTCAACAACACTCACTCGCTCAGGGCTTCCTCTACAACTGCAAGGCATGTCAGGTATGTCTGTCCAGGGTGTTTTCAGAAACATTTAACTGAGAAAGATACCCACCTATGGTTGGGGAGCATCATCCATTGGACTAGGCTCAAGGGCTAAATAA…	GAATCCAGAACCTCAGGAATTCATTTACAGCATATGAGGAGGAGTTGGCTAGTTTTGGGGGGTCGGGGGGGGGTCTCTGTTGGCAAGCAGTCTCCAGCTGTAACCATGTAGTTGCTAGCTTTCATACACCCTGATCACTTATCAGTAAACAGTCAAACTTTGCTTTTCTGAGCCTGAACCGCATGGGAATAGGTTTGCCGATTTCCCATGGGTCTACTCAGAGTCCTTGGCAAGACTGGGCCCATGTCAACAACACTCACTCGCTCAGGGCTTCCTCTACAACTGCAAGGCATGTCAGATATGTCTGTCCAGGGTGTTTCCAGAAACATTTAACTGAGAAAGATACCCACCTATGGTTGGGGAGCATCATCCATTGGACTAGGCTCAAGGGCTAAATAA…
chr3	106480576	106480577	165.5	8	B6xCAST	CTTTTTTCTTCTTAGAAAAATCATCAGGATTATGGCTTGGAGGGAGATGGCCTTAGGCACTTGGTAATTGGGCTGAAATTCTTGCTTGCCTACTGGCAAAAGCTTCCACAGAGTTCCCAGCTGACAGGTTTCTTCTTTTCCACTTCTCATGACATGAAGCTCTGGGGATGTCTATACACCCATGCCCATTGTTTGGCTGTATAAAATAGTCACGTTATGGAATCAGCCTAGGTACCGATCCATAGCATGAATGGATAAAAAGTGTGGTTTATACACATTGAAGTATTGTTCAACTGTGAAGAAGAGAAAAATTATGACATATTCAAGAAGATGAATGCACTGGAGATCACCATATTAAGTAAAATAACCAGACTTAGATAAATACAGCATTTTTTTCTC…	CCTTTTTTCTCCTTAGAAAAATCATCAGGATTATGGCTTGGAGGGAGATGGCCTTAGGCACTTGGTAATTGGGCTGAAATTCTTGCTTGCCTACTGGCAAAAGCTTCCACAGAGTTCCCAGCTGACAGGTTTCTTCTTTTCCACTTCTCATGACATGAAGCTCTGGGGATGTCTATACACCCATGCCCATTGTTTGGCTGTATAAAATAGTCACGTTATGGAATCAGCCTAGGTACCGATCCATAGCATGAATGGATAAAAAGTGTGGTTTATACACATTGAAGTATTGTTCAACTGTGAAGAAGAGAAAAATTATGACATATTCAAGAAGATGAATGCACTGGAGATCACCATATTAAGTAAAATAACCAGACTTAGATAAATACAGCATTTTTTCTC…
chr3	117863071	117863072	500.5	83	B6xCAST	GGCCTCCCCAAGTCCCTGTCAAAGCAGGGGGGAGGAAGATCCTCAGAGGAGGCACAGACAGCTCAAGTTACAGCACAGTGAATGTTCTTTGTGACCTTGAAAAAGTGGCATTTGTTTAGACGGACTACTGTGGTAATTTCTATATATTGATCTTCCAGGCACCAAAATCCACATGAAATGATTACCTATAAAACAGTCCTATAAAAAGTTCTCATCCAACGTAGCCTGATGTTTCCTCCTTTAATATTATAACTGATCACATACGCTAACTCAAACTGAGGATATGGGGATTTCATAATTTCCTTCCTTCATTTAGGAAAAGATATATATATATACAAGAGAACTTCACATGTAAGAGAGCTGTGATTGCAGAGGAATTTTCAGTGGGTGGAACAGGAA…	CGCCTCCCCAAGTCCCTGTCAAAGCAGGGGGGAGGAAGATCCTCAGAGGAGGCACAGACAGCTCAAGTTACAGCACAGTGAATGTTCTTTGTGACCTTGAAAAAGTGGCATTTGTTTAGAAGGACTACTGTGGTAATTTCTATATATTGATCTTCCAGGCACCAAAATCCACATGAAATGATTACCTATAAAACAGTCCTATAAAAAGTTCTCATCCAACGTAGCCTGATGTTTCCTCCTTTAATATTATAACTGATCACATACGCTAACTCAAACTGAGGATATGGGGATTTCATAATTTCCTTCCTTCATTTAGGAAAAGATATATATATATACAAGAGAACTTCACATGTAAGAGAGCTGTGATGGCAGAGGAATTTTCAGTGGGTGGAACAGGAA…
chr3	119794871	119794872	187.5	32.5	B6xCAST	ACTGTGGAAGGTGTTATGGTTGGACTTTCATTCCATCCTTCCCATGTGGAATAGCCATGCAATTTGGGTGCATTTGACTTTCTTCTACAGCTCGGGGATAAAAGCCTGTCAAAGTCATGTCTCCTAGCTGTGGTCATAGTTTCTAGTAAGATCCAAAGCCAGTCTATGCTCAATCCGAGATTGCCTCGGAGATAGATCCTGCCATTTCCATTTGATGTTGGTACAAATGTATTCATTAGGAGCATGGAGCTCTGATGGACACCAGTCACCACACAGACCACAAAAGCAGCTTACCTAAAAATAAATCCTACAGGAAGACAGAAATCTGTTTTGCACCTCAGCAAGCTCTTCTCCCTAAGACAAGAGGACATCGTTTTAGAACAGACGGCCATTTCAGTT…	AAGGTGTTATGGTTGGACTTTCATTCTGTCCTTCCCATGTGGAATAGCCATGCAATTTGGGTGCATTTGACTTTCTTCTACAGCTCGGGAATAAAAGCCCATCAAAGTCATGTCTCCTAGCTGTGGTCATAGTTTCTGGTAAGATCCAAAGCCAGTCTATGCTCAATCCGAGATTGCCTCGGAGATAGATCAATAACCCTGCCATTTCCATTTGATGTTGGTACAAATGTATTCATTAGGAGCATGGAGCTCTGATGGACACCAGTCACCACACAGACCACAAAAGCAGCTTACCTAAAAATAAATCCTACAGGAAGACAGAAATCTGTTTTGCACCTCAGCAAGCTCTTCTCCCTAAGACAAGAGGACATCGTTTTAGAACAGACGGCCATTTCAGTT…
chr3	132246210	132246211	460.5	78.5	B6xCAST	GTGTCACTGGGCATGTCAACCACATGCCAGGGCTAGCCCCATAGCCAGAAGTAGTTTGGGGTGTGTACTTTTTGTTTTTGTTTGGGTGGTTTTTGTCTTGGTGATGTTCTTTTCCAGTTTGTCTATTATTTCAGGACTTTTTTTTTTTAGGTGTGTGTTTGTTTGTTTCTTTTTTCTGTTTTTTTTTTTTTTAATACATAGAAGGAAAGAACATGAAGTTTATTGGGTAGTAAGGTGATGAAGTGCTAAGAGGACTTGGGAGATGGGAAAAATATGATGAAAATATATATATAAGAACATATAGTGGTGTATAGTCTTGTAGCTAACCAAGGGTTTTACTCACCGAATTTCTTAAATAGTTTCATTGCTTAAAGAGAAGAACTTAAGGTCAAGGCTCAG…	CAAAGTGTCACTGGGTCTATCAACCACACGCCAGGGCTAGCCCCATAGCCAGAAATAGTTTGGGGTGTGTACTTTTTGTTTTTGTTTGGGTGGTTTTTGTCTTGGTGATGTTCTTTTCCAGTTTGTCTATTATTTCAGGACTTTTTTTTTTTAGGTGTATGTTTGGTTTTTTTTCTGTTTTTTTTTTTTTTAATACATAGAAGGAAAGAACATGAGGTTTATTGGGTAGTAAGGTGGTGAAGTGCTAAGAGGACTTGGGAGATGGGAAAAATATGATGAAAATATATATAAGAACATATAGTGGTGTATAGTCTTGTAGCTAACCAAGGGTTTTACTCACCGAATTTCTTAAATAGTTTCATTGCTTAAAGAGAAGAACTTAAGGTCAAGGCTCAGCAA…
chr3	134366921	134366922	115.5	9.5	B6xCAST	GCACCTTCTATCCACACATTTGATTCTTAAGAATGAAAATGTCACCAAATTATAATCTAATTTTTGTCATCATTTGTCATTATTTTTCTTCATTCAATTTTAGAGCCAACACCACACACACAGACATACACATATGCATGCACACAGACACACAGAGAGACACATACACAGACACTACACACACACACACACACACACACACACACACACACACACACACTACATTCTCATATCTTACTTCCAATCTATTCAAATTATAACATTTATAGATAAATTGGAGTGTGTTTCTATGTTAGATCTATACTTAGCTTCACATACAAATATACAGATACATATGAATATAACCATATATTCTGAAATAGCTGTAGTCATAAAATGACAATTTTATGTTTCCAGTTG…	GCACCTTCTATCCACACATTTGATTCTTAAGAATGAAAATGTCACCAAATTATAATCTAATTTTTGTCATCATTTGTCATTATTTTTCTTCATTCAATTTTAGAGCCAACACCACACACACAGACATACACATATGCATGCACACAGACACACAGAGAGACACATACACAGACACTACACACACACACACACACACACACACACACACACACACACACACTGCATTCTCATATCTTACTTCCAATCTATTCAAATTATAACATTTATAGATAAATTGGAGTGTGTTTCTATGTTAGATCTATACTTAGCTTCACATACAAATATACAGATACATATGAATGTAACCATATATTCTGAAATAGTTGTAGTCATAAAATGACAATTTTATGTTTCCAGTTG…
chr3	139154515	139154516	129.5	23	B6xCAST	TTCCCCTTCCACCACTCCCCAAAATAACCACTATGATTAAGCTGTGATACTTGACACTAGATTTAGTATTGTCACAGAAAAACAAGGAGGGTGAGTTGGCTCAAGTCCCTTCATGGGGATCAGCCACTGAGCTTCTCTTCATGATCTGGCTTGCTCTACTGCGGCAGACCTTTGTTCTCCGTCCAGCTTGTGTGCTACTGTGTTTCAGAGGCCATTTGCTTCACTTTAATAACCTGCTGCCCTCCTGGAGCCTAGGTCCCTAAGATGTCTTGGTTCTAAAAGCATTTTTTTTTCTTTTACTCATCCTAAGATGCACCTTTTAAGCCCTCTCTTCATTTAACACCAGGGCCTGTTCCTAGGAAAATGGATACCAGGAACACAGCACAAGGGCACATCAGG…	TTTCCCCTTCCACCACTCCCCAAAATAACCACTATGATTAAGCTGTGATACTTGACACTAGATTTAGTATTGTCACAGAAAAACAAGGAGGGTGAGTTGGCTCAAGTCCCTTCATGGGGATCAGCCACTGAGCTTCTCTTCATGATCTGGCTTGCTCTACTGCGGCAGACCTTTGTTCTCCGTCCAGCTTGTGTGCTACTGTGTTTCAGAGGCCATTTGCTTCACTTTAATAACCTGCTGCCCTCCTGGAGCCTAGGTCCCTAAGATCTCTTGGTTCTAAAAGCATTTTTTTTTCTTTTACTCATCCTAAGATGCACCTTTTAAGCCCTCTCTTCATTTAACACCAGGGCCTGTTCCTAGGAAAATGGATACCAGGAACACAGCACAAGGGCACATCAG…
chr3	140175468	140175469	271.5	36	B6xCAST	TTGGTTTATTGTAGAGTTGTATGGTTCTGAGCTTAAATTTAAGCTTCTGCTCCATTTAGAGGTAAATTTTGTGAAGTTTATAAGGTCTATGTCAGTTATCAGCACTCTTTTGTGTTTTGGAGATGTCAAGTTATTTTCAGATCCTTCTGTTGATGAAGCTGTCTTATCTCCATGGCACTGTTTACATGTCTTTGTCAGAGCCTGCATCTGGGCTTTCTATTCTAGTCAACTGATATGTCTGTCTATACCTATACTTGAATCTTGCTTTCTGGGTTATAGTATGTTTTGATGTTTACTATTATTATTATAGACTCAGTGAGGCATATTTCTTTAGAAACAAACTCTCATCTTAGTGCTCCTGTAGATGAAATGTTTCATCAGTTTCAAAGAGCTACTTGG…	TGGTTTATTGTAGAGTTGTATGGTTCTGAGCTTAAATTTAAGCTTCTGCTCCATTTAGAGGTAAATTTTGTGAAGTTTATAAGGTCTATGTCAGTTTTATCAGCACTCTTTTGTGTTTTGGAGATGTCAAGTTATTTTCAGATCCTTCTGTTGATGAAGCTGTCTTATCTCCATTGCACTGTTTACGTGTCTTTGTCAGAGCCTGCATCTGGGCTTTCTATTCTAGTCAACTGATATGTCTGTCTATACCTATACTTGAATCTTGCTTTCTGGGTTATAGTATGTTTTGATGTTTACTATTATTATTATAGACTCAGTGAGGCATATTTCTTTAGAAACAAACTCTCATCTTAGTGCTCCTGTAGATGAACTGTTTCATCAGTTTCAAAGAGCTACTTG…
chr3	143303482	143303483	836	44.5	B6xCAST	ATTATAAAAATACATTTTTGTAAAATTTATAGTTTTGTGTTTGAATTATGTGTGCTGCCATGTTTTAGGGATTTATAGGCCTAACTCTAAGAGTAACTATAAGTAATAATAAAGAGAATACTTATCAATACATTCTAAGCTTAATGTGTTGTCTCATTCACTCATTCATTCCTTGGAAACCTCTGGGCATGCTAAGGTGAAAGCTTGCATAGTCAACAAATACAAAATACAATACAAGAAAGTATAGGGCACACAGAAACGAGAGAAACAATTTGTATAGGAGTTGAGGGATTGAAAGTTATTAGAAAATGATTTGACATTTTAACTTGGTCCTAAATCATAAGAGAAATGTATCTAGTAGAGAGAAGAAAGAAGGCAGAGGGGACAACTTAGGCAAAG…	ATTATAAAAATACATTTTTGTAAAATTTATAGTTTTGTGTTTGAATTATGTGTGCTGCCATGTTTTAGGGATTTATAGGCCTAACTCTAAGAGTAACTATAAGTAATAATAAAGAGAATACTTATCTATACATTCTAAGCTTAATGTGTTGTCTCATTCACTCATTCATTCCTTGGAAACCTCTGGGCATGCTAAGGTGAAAGCTTGCATAGTCAACAAATACAAAATACAATACAAAAAAGTATAGGGCACACAGAAACGAGAGAAACAATTTGTATAGGAGTTGAGGGATTGAAAGTTATTAGAAAATGATTTGACATTTTAACTTGGTCCTAAATCATAAGAGAAATGTATCTAGTAGAGAGAAGAAAGAAGGCAGAGGGGACAACTTAGGCAAAG…
chr3	150881723	150881724	601	65.5	B6xCAST	ATTTTCAAACTCTCCTCTTCACTCCAGCTACAAAGAGCGACTATGCCCTTGCTCACCTCGCTCTCTAGGAAAGTCTAACTGCTACTTCCATAAGAATATAAAGCTGCTGTTGTTCTCATTATCATGAAATTTCAAGCTAACAGCTTGAGACGAAAGGTAAATGTTCTAAATGTAGAATCATTCATTTCTTAAAAGTTTGTTTTGCTTTTGTCTAAACTGAGGTTCTCTCTCATTATTGACTTTAATGTAATAAGCTCAAAGTGCCTGCAAACCAAGTATGAAAGTTAAAATAAAACAGAACAAAACAAACAACAGCAACAAAAACAAGGCTAAAAGATGGGTGGACTTTTTGCCTCTTCATATGCTGGGACCTGGGTCCCATCCACAAAAAATAAATAA…	GATTTTCAAACTCTCCTCTTGACTCCAGCTACAAAGAGCGACTATGCCCTTGCTCACCTCGCTCTCTAGGAAAGTCTAACTGCTACTTCCATAAGAATATAAAGCTGCTGTTGTTCTCATTATCATGAAATTTCAAGCTAACAGCTTGAGACGAAAGGTAAATGTTCTAAATGTAGAGTCATTCATTTCTTAAAAGTTTGTTTTGCTTTTGTCTAAACTGAGGTTCTCTCTCATTATTGACTTTAATGTAATAAGCTCAAAGTGCCTGCAAACCAAGTATGAAAGTTAAAATAAAACAGAACAAAACAAACAACAGCAACAAAAACAAGGCTAAAAGATGGGTGGACTTTTGCCTCTTCATATGTTGGGACCTGGGTCCCATCCACAAAAAATAAATAA…
chr3	150882851	150882852	1283.5	112	B6xCAST	TAACTAGGGCAAGATTAATGGTTGTTTTTACTAGAGCAGGTGTTCAAAAGGATGTGTGCATAGCCATCTTTGTCTTGGGATAACCATGCCTACAATTCTGTTCGGCTTCTGGTTTCAGTTTGCCCTAGGGTACAGACTGCCATGCTGCTGTATCTGCTTCATCAGGGGATACAGAACAGGATTCCCATGGTTTTACAAATGTCAGGAAGAAATGTGAATCAAAGAAACAAACCTATGCACGAATTATTGAGTGAAGAATGTCTACAGAGAAGTACAAGAAAATGAGGAAAATAGGTTTGAAACATTGTGTAAAACTACAGAGAAAATAACAGATAAAAGGAATCTCACTCTCCTATACTTATACAGGCCCTACAAACTAGGATCCTTAAAAAAATCACA…	TAGGGCAAGATTAATGGTTGTTTTTACTAGAGCAGGTGTTCAAAAGGATGTGTGCATAGCCATCTTTGTCTTGAGATAGACCATGCCTGCAATTCTGTTCTGCTTCTGGTTTCAATTTGCCCTAGGGTACAGACTGCCATGCTCCTGTATCTGCTTCATCAGGGGATACAGAACATGATTCCCATGGTTTTACATATGTAACAGGAAGAAATGTGAATCAAAGAAACAAACCTATGCACGAATTATTGAGTGAAGATTGTCTACAGAGAAGTACAAGAAAATGAGGAAAATAGGTTTGAAACATTGTGTAAAACTACAGAGAAAATAACAGATAAAAGGAATCTCACTCTCCTATACTTGTACAGGCCCTACAAACTAGGATCCTTAAAAAAAATCACA…
chr3	152510285	152510286	399	34.5	B6xCAST	ATGCAGTACCCACGGAGGCCAGAAGAGGACTTCTGGAACAGCGGTTTTGGGTGGCTATAAGCCATGTAGGTGCCGGGAACTGAACCCAGGTCCTATGCAAGGGTAGCAAGCACTCATAATTGCTGTGCCATTTCTCCAGCTGATTGGTTTTTGAGACAGGGTCTCATGGCATTTCTAGCTGACCCAGAGCTCACTGTGTAGACCAGTCTTGCCTTTGAACTCACAGACACTTGCAGGCCTCTGCCTTTGAGTGCTGGGATCCAAGGCAGTACCAGCACACTTGACTTCATCAAGTGATCTAACAATGGCATGGCGAACTTTACTAGATGGCCGAGAAGGAGGTTTTTGAACTCTTTTATCCCCAGCAGGAGAAAACCCCAAAATGTATGGGAAGTGGTA…	ATGCAGTGCCCACGGAGGTCAGAAGAGGACTTCTGGAACAGCGGTTTTGGGTGGCTATAAGCCATGTAGGTGCCGGGAACTGAACCCAGGTCCTATGCAAGGGTAGCAAGCACTCTTAATTGCGGTGCCATTTCTCCAGCTGATTGGTTTTTGAGACAGGGTCTCATGGCATTTCTATCTGACCCAGAGCTCACCGTGTAGACCAGTCTTGCCTTTGAACTCACAGACACTTGCAGGCCTCTGCCTTTGAGTGCTGGGATCCAAGGCAGTACCAGCACACTTGACTTCATCAAGTGATCTAACAATGGCATGGCGAACTTTACTAGATGGCCGAGAAGGAGGTTTTTGAACTCTTTTATCCCCAGCAGGAGAAAACCCCAAAATGTATGGGAAGTGGTA…
chr3	152847351	152847352	324.5	39.5	B6xCAST	CTGATCATATCTGGTCCATTGCAACTATACGGACCCCCCCTTTCTTTAAAACTGCAGATAAGAGGCTGTTAGACAAGGGAGAAGGGGCTGGTATTGATCTGTCACTGGCTATACTTAGATACCAGTGTGGACATGTGAAGCCAGCGAGGTGAAGACTGTTGCATGCTTAGTTAGCTTAGAGATGGGAAGCCATGAAGGCATACTTTCAAAGCTAGGTCTTTCCCAATCCAAAGCTGGCCCCAAGGCAAAGCAAAGTCTCTTCTGCAAATTGTGTGACTGCGTTTGCAACTCTCATTCATCTTATTCCAAAGCTAAGCGTTGTCAAGGCCTTCGGATGCTGGGAGAGCATGCTGACCCTTAATAAAAAGTACCATTCAGGAATCACGGGAGCAATGACAC…	CCTGATCATATCTGGTCCATTGCAACTATATGGCCCCCCCTTTCTTTAAAACTGCAAATAAGAGGCTGTTAGACAAGGGAGAAGGGGCTGGTGTTGATCTGTCACTGGCTATACTTAGATACCAGTGTGGACATGTGAAGCCAGCGAGGTGAAGACTGTTGCATGCTTAGTTAGCTTAGAGATGGGAAGCCATGAAGGCATACTTTCAAAACTAGGTCTTTCCCAATCCAAAGCTGGCCCCAAGGCAAAGCAAAGTCTCTTCTGCAAATTGTGTGACTGCGTTTGCATCTCTCATTCATCTTATTCCAAAGCTAAGCATTGTCAAGGCCTTCGGATGCTGGGAGAGCATGCTGACCCTCAATAAAAAGTACCATTCAGGAATCATGGGAGCAATGACAC…
chr3	153363497	153363498	154	26.5	B6xCAST	ACATTTCAAGGGACAAATTCAAAGAAGATGACAAAATGACATTATTCTGCAAAATCCAATTAAACTCCCATTAAAATATTTAGAAATCTGTTTTCCTTCATATTAATTTCTCTGACGTATTTATATTTTAAAATAAATGCACTGGATTAAACTTTATAAATAGTGGTGGTGATTTCTACAAAAGCTTTGACTTTAAGCAGGGCAAGGAATGTTTGAACACAAGTCACAGTCTGGGATGTCACTTAAACAGTATGTGTCCAAAAGGTAATATATTTTGCATAGCTATCTAGCACACACAGAGATACGGACTAGGTCCTGTGCTGCATGCTAAGCGTGCCTTCCACTCATGAGCTGCACCCCAGCTTCTCCATGTGAAATGTTAGCTTAGGGTGCACAGTA…	TGTGCTAACATTTCAAGGGACAAATTCAAAGAAGATGACAAAATGACATTATTCTGCAAATAAACTCCCATTAAAATATTTAGAAATCTGTTTCCCTTCATATTAATTTCTCTGACGTATTTATATTTTAAAATAAATGCACTGGGTTTAACTTTATAAATAGTGGTGGTGATTTCTACAAAAGCTTTGACTTTAAGCAGGGCAAGAGATGTTTGAACACAAGTCACAGACTGGGATGTCACTTAAACAGTATGTGTCCAAAAGGTAATGTATTTTGCATAGCTATCTAGCACACACAGAGATACGGACTAGGTCCTGTGCTGCATGCTAAGCGTGCCTTCCACTCATGAGCTGCACCCCAGCTTCTCCATGTGAAATGTTAGCTTAGGGTGCACAGTA…
chr3	155934336	155934337	279.5	41	B6xCAST	AGGGGTGGGACTTTTAGGATTCCTGGGAAGGGACCGAGGAAGAAGGAAGCAGGAATTTTGCAATGACAAGGGTAGTGCAGGAGGGAGACCCAGACAACATGTAGGTACAGGAAGAAAGTGGCCCCAGGAAAATTATAGTATTTTGGTCCACTAGAATTTATGCCAAAATCATAAGAACACCCATGCACGAAATCTCAGTCAGCATTGCCCATACCAAAGCAACACATGCAGGGAGCCAAAAAACACAATTTTCTGTAAAACAAGAATGTGTGAGCTGGACCTTTGCTGAAGCCACTGTTGTACCAATTGATTATCATTTATGTGAAATATATTGAACACATGTTTTTCTATTTTTCTGAGTTGACCTCTTAGATTCCAGGGACACCAAGTCATTAGAAG…	AGGGGTGGGACTTTTAGGATTCCTGGGAAGGGACCGAGGAAGAAGGAAGCAGGAATTCTGCAATGTCAAGTGTGGTGCAGGAGGGAGACCCAGACAACATGTAGGTACAGGAAGAAAGTGGCCCCAGGAGAATTATAGTATTTTGGTCCACTAGAATTTATGGCAAAATCATAAGAACACCCATGCAAGAAATCTCAGTCAGCATTGCCCATACCAAAGCAACACATGCAGGGAGCCAAAAAACACAATTTTCTGTAAAACAAGAATGTGTGAGCTGGACCTTTGCTGAAGCCACTGTTGTACCGATTGATTATCATTTATGTGAAATATATTGAACACATGTTTTTCTATTTTTCTGAGTTGACGTCTTAGATTCCAGGGACACCAAGTCATTAGAAG…
chr3	159743594	159743595	261.5	21.5	B6xCAST	GCTTCTCTTGGTCTCAGTTTAGTTTAATTAACTACAAAATATTTAAGGATTCCTTTGTTCTCCTCTAATTTTCTCAAATTTGAGATTGTATCAATTCTTTTATTTTCCTTTTAGTGCTGGGATTAGACACAGGTTCCCACACATGCTGAATGCACATTCTACCACTGAGCGACAACCTAGGCCTGGATTACCTTTTTATATCTCTAGGCAATGCTTTCTCTCCATTCAACAACATTTGGAAACAACACTCATGTTTCACTGCAGTTCAAATTCTTTCCAATAGTACTTACTATAATAAAAACTATCTCATTCATTTATAAAATAAATTATAGATTAGACCTAATGTCTAACAAAAAAATGCAGTTTCCAACACTTCAAAAAATGGACAGGAAGAGGACA…	GCTTCTCTTGGTCTCAGTTTAGTTTAATTAACTACAAAATATTTAAGGATTCCTTTGTTCTCCTCTAATTTTCTCAAATTTGAGATTGTATCAATTCTTTTATTTTCCTTTTAGTGCTGGGATTAGACACAGATTCCCACACATGCTGAATGCACATTCTACCACTGAGCGACAACCTAGGCCTGGATTACCTTTTTATATCTCTAGGCAATGCTTTCTCTCCATTCAACAACATTTGGAAACAACACTCATGTTTCACTGCAGTTCAAATTCTTTCCAATAGTACTTACTATAATAAAAACTATCTCATTCATTTATAAAATAAATTATAGATTAGACCTAATGTCTAACAAAAAAATGCAGTTTCCAACACTTCAAAAAATGGACAGGAAGAGGACA…
chr4	20325617	20325618	169	11	B6xCAST	TAATCCTTCTACCTTCATCCTCCACAATGATCCATGAGTTTTACAGGAGACAGAATATGATACAGTTATCTTAGTTAGAACAGAGCACTCTATAATCCCACGTTCTCTGCATGTTGACCTGTTGTGGGACTCTGTATTGGTTTTCATGTACTATAAAAAGAAACTTCTGAGATGAGAGTTAAGTGACATACTATATCTATGGATAGAAAAATAAGAACTTGGAGAGCAGTTTATTATTATGTCAGTTTACCAGAATCACAGTACTAAGTTCTTCTCTAGGCCAATGACATAAGCAGCTACAGTTTACCTAGCCTAAATACCAGGCATAACTTCTACCTTGTGAGGTAAACTTTAGTCCAATAAAAAAGTGGCTACTTATCCTTATAATATTTGTGTATC…	TAATCCTTCTACCTTCATCCTCCACAATGATCCATGAGTTTTACAGGAGACAGAATATGATACAGTTATCTTAGTTAGAACAGAGCACTCTATAATCCCACGTTCTCTGCATGTTGACCTGTTGTGGGACTCTGTATTGGTTTTCATGTACTATAAAAAGAAACTTCTGAGATGAGAGTTAAGTGACATACTATATCTATGGATAGAAAAATAAGAACTTGGAGAGCAGTTTATTATTATGTCAGTTTACCAGAATCACAGTACTAAGTTCTTCTCTAGGCCAATGACATAAGCAGTTACAGTTTACCTAGCCTAAATACCAGGCATAACTTCTACCTTGTGAGATGAACTTTAGTCCAATAAAAAAGTGGCTACTTATCCCTATAATATTTGTGTATC…
chr4	26790603	26790604	154.5	17.5	B6xCAST	AGCTATTTCCAATTTTCTGAGGAACTACCAGATTGATTTCCAGAGTGGCTGTTCCAGTGTGCAGTCCCATCAACAACGGAGGAGTGTTCTTTCTCCACATCCTTGACAGCATGTGCTGTCTCTTGAGATTTAGATCTTAGTTATTCTGATTGGTGTGAGGTGGAATCTCAGGATCATTTTGATATGCATTTCTCTTATGATTAATGACAAAACATTTTAAACATTTTTTAAGTGCTTCTCAACCATTCAAGATTCTTCTCTTGTAAATTTTCTGTTTGTTTGTGTACTACAACATTTTTAAATTGGATTATCTGGTTTTCTGTGGTTTAACTTCTTGAGTCCTTTCTATATTTTGGATATTAGCCTTCTGTAGATGTACGGTCAGTGAAGATTTATTTC…	AGCTATTTCCAATTTTCTGAGGAACTACCAGATTGATTTCCAGAGTGGCTGTTCCAGTGTGCAGTCCCATCAACAACGGAGGAGTGTTCTTTCTCCACATCCTGGACAGCATGTGCTGTCTCTTGAGATTTAGATCTTAGTGATTCTGATTGGTGTGAGGTGGAATCTCAGGATCATTTTGATATGCATTTCTCTTATGATTAATGACAAAACATTTTAAACATTTTTTAAGTGCTTCTCAACCATTCAAGATTCTTCTCTTGTAAATTTTCTGTTTGTTTGTGTACTACAACATTTTTAAATTGGATTATCTGGTTTTCTGTGGTTTAACTTCTTGAGTCCTTTCTATATTTTGGATATTAGCCTTCTGTAGATGTACGTTCAGTGAAGATTTATTTC…
chr4	27344698	27344699	121.5	8	B6xCAST	TTCGTTGGGAAGAAGATACATTTAAACTTCCAGACATGAATTAGGAAAGCACCATCCTGGATGATCAGGAGCAAGAATGAAGCTGACTACTTACAAGTTACTTCAAGCTGTGCATGAAATGCTCCAGATAACTTGGGTAACGGTTGTTAGCTAGTGTGAATAAAAGCCCTTCAGAATTACCCATATCAATTTACTTTTAAATAGTTCTTTCTTGCTGACTATGAACCCATCAACTGCAGTATTTTTAGAACATTTTCTTCCCTTGAATGGCTACTCTGACAGACTCCTCTAGGAAAAGCGTAGTGCATTTAAAAGTTTCAGGTAATTACAACCTTAGGTCCAGTAGTACTGAAAAGAGATTTACAGTGAGAAACTGGTTGTTTGTACAGTAAAGACTCT…	TTCGTTGGGAAGAAGATACATTTAAACTTCCAGACATGAATTAGGAAAGCACCATCCTGGATGATCAGGGGCAAGAATGAAGCTGGCTACTTACAAGTTACTTCAAGCTGTGCATGAAATGCTCCAGATAACTTGGGTAACGGTTGTTAGCTAGTGTGAATAAAAGCCCTTCAGAATCACCCATATCAATTTACCTTTAAATAGTTCTTTCTTGCCGACTATGAACCCATCAACTGCAGTATTTTTAGAACATTTTCTTCCCTTGAATGGCTACTCTGACAGACTCCTCTAGGAAAAACGTAGTGCATTTAAAAGTTTCAGGTAATTACAACCTTAGGTCCAGTAGTACTGAAAAGAGATTTACAGTGAGAAACTGGTTGTTTGCACAGTAAAGACTCT…
chr4	27346301	27346302	162.5	21	B6xCAST	AAATAATAATTTTCCTATCTAGTTTTACAAGAACTTAATATAAATTAGAGATGCATTGAGAGAATCTCAAGAAAAACAAAACAAAACAAACAAAACAAAACAAAACAAAACAAAACAAAACAAAACAAAAACAAAAACACCTCCACAAGATTTACCTGTGGAAAACTTGTAATGAGTTGACTTTTTTAATATTTAAGTTTTTTGAAAAATAATTGCATAATTTCTTCCATCCACATCTTGCTTCACTCCATATGCTTTCATATATCCCTACTTGATCTCTTTCAAATTCTTGTCCTCTTTTTCGATTAATTGCTGTATGTACATACATGTACATGTGTGTAAAAATCCAAGTCTATATAATGTTGCTTGTATTCTATTCCAGGTTGACAATTTGGTATT…	CAAATAATAATTTTCCTATCTAGTTTTACAAGAACTTAATATAAATTAGAGATGCATTGAGAGAATCTCAAGAAAAACAAAACAAAACAAACAAAACAAAACAAAACAAACAAAACAAAACAAAACAAAAACAAAAACACCTCCACAAGATTAACCTGTGGAAAACTTGTAGTGAGTTGACATTTTTAATATTTAAGATTTTTGAAAAATAATTGCATAATTTCTTCTGTCCACATCTTGCTTCACTCCATATGCTTTCATATATCCCTACTTGATCTCTTGCAAATTCTTGTCCTCTTTTTCCATTAATTGCTGTATATACATACATGTACATTTGTGTAAAAATCCAAGTCTATATAATGTTGCTTGTATTCTATTCCAGGTTGAAAATTTGGTATT…
chr4	43358037	43358038	121	11	B6xCAST	CATTTGGGATATATCATATTAAGAAAAAGAGTGGCAGGAAACCAGATCACTATACTCAGAGATTCCTAACCTCTACCTGTATTTGTAAAAGGCTAGCAGTTTAAGGAAAGAGTCAAAGGACAGGATAGTGAAGAACAGATCAGTAAAATATTCCATAAAGTAGATTGTAGAAAATTCTGTTTTACTAGGCATTAACACAGAACTGGAAGCCAGAGAACAAATTCCCAGGAAACATGAAGAGATGCTTGACATCATTAGTTATTACAAAAATACAATAAAAACCATGAAATTCTACTTTTCCCTATACCATTTTGGTTCAAACCAGATGACCAGACCATAATATATGTCATCTAGATGTAGAAAAATGGAGCCCTCATACATTGCTGATAAACAGGTAAA…	CGTTTGGGATATATCATATTAAGAAAAAGAGTGGCAGGAAACCAGATCACTATACTCAGAGATCCCTAACCTCTACCTGTATTTGTAAAAGGCTAGCAGTTTAAGGAAAGATTCAAAGGACAGGATAGGGAAGAACAGATCAGTAAAATATTCCATAAAGTAGATTGTAGAAAATTCTGTTTTACTAGGCATTAACACAGAACTGGAAGCCAGCGAACAAATTCCCAGGAAACATGAAGAGATGCTTGACATCATTAGTTATTACAAAAATACAATAAAAACCATGAAATTCTACTTTTCCCTATACCATTTTGGTTCAAACCAAATGACCAGACCATAATATATGTCATCTAGATGTAGAAAAATGGAGCCTTCATACATTGCTGATAAACAGGTAAA…
chr4	53153642	53153643	235	33	B6xCAST	ATTTACTGCCTTCATTTTCACATAATGGAGCTCTTGTCCAGGGCCAGCTTAGAGATCAGGTGACTGGTATCAGGACCCTTCTCCAGATTGCCCTTTCACCAGCCAGCTCCGGAAGCAGGCCAAGCAGATGCCCTGTGTCCCTAACATGCCAGTTCTGCAACACAGCAAGCGCCAACTAACCAGGTATGTGAGAACGTCATTCAGCTGCCATCAGTCCCAAAGGCCCGAGTCCTTCCCTCCAGTCTGACACCTTCTCCACAAAAAGACAAACAAGCCACTTTGCTGGCTACCTAACTAGAGGAGGAGAAAAAGAGGAATAAGACCACAACTGGTTCTGAAAAACAAAAAACTTAAGGGTGTGTCCACTTTTTATTTTTTTAGTATTGACAACAAGAAAAC…	TTTACTGCCTTCATTTTCACATAATGGAGCTCTTGTCCAGGGCCAGCTTAGAGATCAGGTGACTGGTATCAGGACCCTTCTCCAGATTGCCCTTTCACCAGCCAGCTCCGGAAGCAGGCCAAGCAGATGCCCTGTGTCCCTAACATGCCAGTTCTGCAACACAGCAAGTGCCAACTAACCAGGTACGTGAGGACGTCATTCAGCTGCCATCAGTCCCAGAGGCCCGAGCCCTTCCCTTCAGTCTGACACCTTCTCCACAAACAGACAAACAAGCCACTTTGCTGGCTACCTAACTAGAGGAGGAGAAGAAAGAGGAGTAAGACCACAATTGGTTCTGAAAAACAAAAAACTTAAGGGTGTGTCCACTTTTTATTTTTTTAGTATTGACAACAAGAAAAC…
chr4	64318265	64318266	235.5	31.5	B6xCAST	GATCTCACAGTCCAAGCACTGAGACAAAACAATAATGTAAATCATTGCGGCGAGAGATGGAGAATGGTGAGTGCCAAAGGTAGGACTCAGAGAGGAAGAATCTATGTAAGAGTGTGCTCCAAACAGAATCGTCAGCGATTCATATTAATTGCTATGTGCTCCAGAACACCATAGGATACTATTTTCCTCATTCTTTACAGTGATCAAGCTTCTGCAGTGTGTTTTCTTGTGTCATTTGCTGCTAACAGTTGATAGTTCCACACTTCAAGCTATATGCACAGAGAAATATAGAAGAGATGTAAGTGAAAGGACATGAATCAGGCTAGGAAGTGGCTAACCTAAATCTTACTCACATCCCAGTGGACAGCAACATGGTCCCAATAGGGGAAAAAAAAAAAG…	AAGATCTCACAGTCCAAGCACTGAGACAAAACAATAATGTAAATCATTGCGGCGAGAGATGGAGAATGGTGAGTGCCAAAGGTAGGACTCAGAGAGAGGAAGAAGCTATGTAAGAGTGTGCTCCAAACAGAATCGTCAGCGATTCATATTAATTGCTATGTGCTCCAGAACACCATAGGATACTATTTTCCTCATTCTTTACAGTGATCAAGCTTCTACAGTGTGTTTTCTTGTGTCATTTGCTGCTAACAGTTGATAGTTCCACACTTCAAGCTATATGCACAGAGAAGTATAGAAGAGATGTAAGTGAAAGGACATGAATCAGGCTAGGAAGTGGCTAACCTAAATCTTACTCACATCCCAGTGGACAGCAACATGGTCCCAATAGGGGAAAAAAAG…
chr4	68547282	68547283	374.5	68	B6xCAST	TGTATTGGAGTAAGGATTCAGTGAAGTCTACCATCATAGATTCTCAAGATCAGAAGGGACATCAGAAGGCATTAAATTACACTGCACTTAATATCTACATTGGATAGTAATCAGAAATGGAGATTCCCAAATGCTTATTTTAACTCTTAAGATGTTAGGATGTTGATTATTATAGGACATCAGCTCCTGATTCTCAGATAAGAATAACTATCACTCCTGGGTATGCTAAGAATCAATGTTATATGCTAGACACATTCCAAATCGATATTAAAAAGAAGGCACATGTTTCTGGAAATAGCATAATGTTTGATTCGATTTTAATATCAAACACAAGACTTCAAATGAGTGGTATACTTTTAGAATCTGTTTTGAGCTATACTTCCTCAAATTCCTATGAGT…	TGTATTGGAGTAAGGATTCGGTGAAGTCTACCATCATAGATTCTCAAGATCAGAAGGAACATCAGAAGGCATTAAATTACACTGCACTTAATATCTACATTGGATAGTAATCAGAAATGGAGATTCCCAAATGCTTATTTCAACTCTTAAGATGTTAGGATGTTGATTATTATAGGACATCAGCTCCTGATTCTCAGATAAGAATAACTATCACTCCTGGGTATGCTAAGAATCAATGTTATATGCTAGACACATTCCAAATCGATATTAAAAAGAAGGCACATGTTTCTGGAAATAGCATAATGTTTGATTCGATTTTAATATCAAACACAAGACTTCAAATGAGTGGTATACTTTTAGAATCTGTTTTGAGCTATACTTCCTCAAATTCCTATGAGT…
chr4	74772179	74772180	704	45.5	B6xCAST	GAAACAAATCCTGTAACTTTAAAATCAAGAGAGACTAGTGGATTGTACTTTTTGTAACTGGAAACTTTTCTTTAGGGCCTGCAAGATGGCTCAGTAGATAGAGGGGTTTGTACCAGGCCTGTCATGGAGTTCAGCAGGTTAGGTATAGAACCTGTAAGTCCATCAGCAAATTAAGAGAATTTACTAAGTAATAAAGGAGCCATAGCTCCAGTTTTTGAAACAAGGAAAAAGGAAGTACCAAGGCCAGGTATCTTCCTGGGGGGCCCTTTCTGAACTGCTTCTACTTAGCACTAGCCAAGGACAGCGAAGCTCCTGTAGAGCTTGCATATGTGTTTTTCTGCCTGATGTTTGAGCTTTCTGTTCTTTAACTATAGCTTCTGTATTTCTGAGAAGTATATT…	AAACAAATCCTGTAACTTTAAAATGAAGAGAGACTAGTGGATTGTACTTTTTGTAACTGGAAACTTTTCTTTAGGGCCTGCAAGATGACTCAGTAGATAGAGGGGTTTGTACCCAGGCCTGTCATGGAGTTCAGCAGGTTAGGTATAGAACCTGTAAGTCCATCATCAAATTAAGAGAATTTACTAAGTAATAAAGGAGCCATAGCTCCAGTTTTTGAAACAAGGAAAAAGGAAGTACCAAGGCCAGGTATCTTCCTGGGGGGCCCTTTCTGAACTGCTTCTACTTAGCACTAGCCAAGGACAGCAAAGCTCCTGTAGAGCTTGCATATGTGTTTTTCTGCCTGATGTTTGAGCTTTCTGTTCTTTAACTATAGCTTCTGTATTTCTGAGAAGTATATT…
chr4	76361674	76361675	104	18.5	B6xCAST	ATCTTAGTCTCTAAGCATTGTTGGATCAACAACCAAGTAAATGGGCCACTCTACAAAGTGGTATATAATTACTCAATATTATAAAAACTCTGACTAAAAGAATCGCCACTAAAAAACTAAACTTTATTCTTCCATAGGTTAAAAGAATAAAGAATTTAATGCTAAAATTTTTACATTTCTTTATGGGATATTAGACATAGTTTATCTGATTTTATGGTTTCAGGATACTTTTATGTTTCTATATATTCTTGCTTTTTGTCCTGGTGAAGCAAATGAAATTCTTGAAAACATTTTTGACATCTTCATATTTGGTGTTTAAGAACAATGAGAGCAGTTCAGGAGTTAGCCTCATGTTAATTTTTTCTATAGTAGACTACTTTTTGGAATACCATATCAAAT…	AATCTTAGTCTCTAAGAATTGTTGGATCAACAACCAAGTAAATGGGCCACTCTACAAAGTGGTATATAATTACTCAATATTATAAAACCTCTGACTAAAAGTATCGCTACTAAAAAACTAAACTTTATTCTTCCATAGGTTAAAAGAATAAAGAATTTAATGCTAAAATTTTTACATTTCTTTATGGGATATTAGACATAGTTTATTTGATTTTATGGTTTCAGGATACTTTTATGTTTCTATATATTCTTGCTTTTTGTCCTGGTGAAGCAAATGAAATTCTTGAAAACATTTTTGACATCTTCATATTTGGTGTTTAAGAACAATGAGAGAAGTTCAGGAATTAGCCTCATGTTAATTTTTCTATAGTAGACTACTTTTTGGAATACCATATCAGAT…
chr4	77291456	77291457	582.5	95.5	B6xCAST	ACTAAGCTTGTACAAAATTAGGATTGGCCTATCAACTGCCAACTAGAATCTCAATAGTCCCTGGTCCTACACCAAAATAGTGGTCACTAAAATATCCTGAAAATAGGGAGCCCATGCCATTAGTTGAGTAGCCAGTAGTGAGTCCAACACATTCCAATGGCAAACTCTAGCCTATTGCTACAAAGACTGTAATGGTTAAAATCATGTGTCTCAAACCAGAAGGGTATAAATATGGAAAAAGGACTTGTAGGGAGGAGAGGCAGTTCATAGAAAAACCATGGTATGCCAAAGACTTGAGTAATATGAATGCATTTTATAGAGGTTGAAAAATGTCAGAACAAATTTAATACATTTTTTTAAATCAAAGTTAATGTAAGGAGCTGGGGAGATGGCTTAGCA…	TAAGCTTGCACAAAATTAGGATTGGCCTATCAACTGCCAACTAGAATCTCAATAGTCCCTGGTCCTACACCAAAATAGTGGTCACTAAAATATCCTGAAAATAGGGAGCCCATGCCATTAGTTGAGTAGCCAGTAGTGAGTCCAACACATTCCAATGTCAAACTCTAGCCTATTGCTATAAAGACTGTAATGGTTAAAATCATGTGTCTCAAACCAGAAGGGTATAAATATGGAAAAAGGACTTGTAGGGAGGAGAGGCAGTTACTAGAAAAACCATGGTATGCCAAAGACTTGAGTAATATACATGCATTTTATAGAGGCTGAAAAATGTCAAAGAACAAATTTAATAAATTTTTAAAAATCAAAGTTAATGTAAGGAGCTGGGGAGATGGCTTAGCA…
chr4	100361160	100361161	191.5	31	B6xCAST	AGCAGACCTTCTGTTCCATGCTGAATCTCCTTTCACAGTCATTGCCCATGACCTTGAACTGGAGGCTGAGCCTGCTGTAGAGCTGTGGGATATACTCACCCGTGTCTAACCCAATCATCCTTTCTTTGCACTTTCCCTTCTCAGATGTTAGCTCCAGTATGAATTTTCTGCTTTAAATCCCATCTAATTCCCAAAGGACCAAAAGCAGTGCTGGCAATACCATATGCACATCTTAGTAGAAAGACTTTGCAGCCTTGAAAGGATGAAGATTAAGGGATGATGGAATCCCTAGCTCTTCCCCAGTGGCATACAAAAATGCCCGGAGAGCCACCCTTTGTGGCTCACATAATATTCAGAATTACAAAGACAACTCCAGACCAAAGGGAAGAGAGTTTAGAA…	CAGACCTTCTGTTCCATGCTGAATCTCCTTTCACAGTCATTGCCCATGACCTTGAACTGGAGGCTGAGCCTGCTGTAGAGCTGTGGGATATACTCACCGTGTCTAACCCAATCATCCTTTCTTTGCACTTTCCCTTCTCAGATGTTAGCTCCAGTATGAATTTTCTGCTTTAAATCCTATCTTGGCATCTAATTCCCAAAGGACCAAAAGCAGTGCTGGCAATACCATATGCACATCTTAGGAGAAAGACTTTGCAGCCTTGAAAGGATGAAGATTAAGGGATGATGGAATCCCTAGCTCTTCCCCAGTGGCATACAAAGATGCCCTGAGAGCCACCCTTTGTGGCTCACATAATATTCGGAATTACAAAGACAACTCCAGACCAAAGGGAAGAGAGTT…
chr4	107865043	107865044	49.5	2	B6xCAST	TAATCTTGGTTTAGCAAGATAACTTGGTGGGCAAAAGCACTTGCCACCAAGGCTGACTGCCTGAGTTGTGTCCCTGCAGACCACATGGTAGGAGGAGGGCTGATTCCTGCAGTATGTCCTCTAGTTTCCACACACTCCACCTTGTAGTATGCATGCCCTACCCTGCAAAATAAATAAGTAAATGTGATTTACAATAAAAACCCTAGCAGGACAAAGGATACATATGACACAGGTAAGTTGATTATGACATGGCAAGTCCTAAGAGTAATCTATGTTACTGTGTTGAGTGGGGGATTCTAAGGAGTCTCTTTGGTCTAAAAGGGAAGGGAAGAGTTGAGGTTCTCCGATGGACATAATCCTTGAGCTGAGTTGGCCAAGTGAAGAAGAACCAAGAACAGC…	TAATCTTGGTTTAGCAAGATAACTTGGTGGGCAAAAGCACTTGCCACCAAGGCTGACTGCCTGAGTTGTGTCCCTGCAGACCACATGGTAGGAGGAGGGCTGATTCCTGCAGTATGTCCTCTAGTTTCCACACACTCCACCTTGTAGTATGCAAGCCCTACCCTGCAAAATAAATAAGTAAATGTGATTTACAATAAAAACCCTAGCAGGACAAAGGATACATATGACACAGGTAAGTTGATTATGACATGGCAAGTCCTAAGAGTAATCTATGTTACTGTGTTGAGTGGGGGATTCTAAGGAGTCTCTTTGGTCTAAAAGGGAAGGGAAGAGTTGAGGTTCTCCGATGGACATAATCCTTGAGCTGAGTTGGCCAAGTGAAGAAGAACCAAGAACAGC…
chr4	111614008	111614009	128	7.5	B6xCAST	TAATAAATAATGAAAATAATCAAACTTGGAAGTGTCTTAACCATGTAAGCAGATGGTCTCTGAAATGTCATTTATAGATTACAAAGCCTCCCTCACCAGAAACTGTTCCTTTGTTGTTGGGGAAAAGATGAGACATCGTGACAAAAGGTTAAATGAAAGAGCTAATTAAGACATCACAGATAAAGCTTCTAGGAGGAGCCTAACATGCCTAAGACACACATGAAATGATGACAAGTCTTACTCCTGGGTCTGCTTCCTAATATAACTCTAAGATTAGAGTCAAAAATACTTATTTCTCTGATTCAAAATACCCCCTACACAACTATCTAGGGCTAGTGAAGTCACTATAGCCGCCACTTTCAAAATATGCTCTAAATATTTGCCCCAATTATTACCCAC…	TTTAATAAATAATGACAATAATCAAACTTGGAAGTGTCTTAACCATGTAAGCAGACAGTCTCTGAAATGTCATTTATAGATTACAAAGCCTCCCTCACCAGAAACTGTTCCTTTGTTGTTGGGGAAAAGATGAGACATCATGACAAAAGGTTAAATGAAAGAGCTAATTAAGACATCACAGATAAAGCTTCTAGGAGGAGCCTAGCATGCCTAGGACACACATGAAATGATGACAAGTCTTACTCCTGGGTCTGCTTCCTAATATAACTCTAAGATTAGAGTCAAAAATACTTATTTCTCTGATTCAAAATACCCCCTACACAACTATCTAGGGCTAGTGAAGTCACTATAGCCGCCACTTTCAAAATATACTCTAAATATTTGCCCCAATTACCCACA…
chr4	133595655	133595656	543	58	B6xCAST	TGTCCAGGGGTACACTGATTCTGCTGACTAACCAGCAAGCTCCAAGGACCTCCTCTCTGCCCACAGCCCTGGGATGACAGCTCACAGGCTTTTACTGTGGGTGCTGGGGTCTTTGTTTAGAGCCTCTGGATGGAGCCGCTCTTCCAATATCTCGGTCCTCCAGTGTTCACACGGCTCTGTGGGTCACAAACATAGCAGAAATGCAAATGGAAGCTTTTTTCCCCAGTCTTCCACGTTGACCTGCAAGTCTCTAAGGTCAGATAGAGATCACAGGTCAGCTTTGCTCTGGGGCGGAGGCGGGGGTGGGGGGAAGAGGGCGGCGGGATGGGGAGAACATGTCTTCCTTCTTCCCATCGCACCCCTACTCCTCTTCTCGGCAGCTCTGCACAGGAGAGCGGC…	TGTCCAGGGGTACACTGATTCTGCTGACTAACCAGCAAGCTCCAAGGACCTCCTCTCTGCCCACAGCCCTGGGATGACAGCTCACAGGCTTTTACTGTGGGTGCTGGGGTCTTTGTTTAGAGCCTCTGGATGGAGCCGCTCTTCCAATATCTCGGTCCTCCAGTGTTCACACGGCTCTGTGGGTCACAAACATAGCAGAAATGCAAATGGAAGCTTTTTTCCCCAGTCTTCCACGTTGACCTGCAAGTCTCTAAGGTCAGATAGAGATCACAGGTCAGCTTTGCTCTGGGGCGGAGGCGGGGGTGGGGTGAAGAGGGCGGCGGGATGGGGAGAACATGTCTCCCTTCTTCCCATCGCACCCCTACTCCTCTTCTCAGCAGCTCTGCACAGGAGAGCGGC…
chr4	140748145	140748146	586.5	27.5	B6xCAST	TAACAAAGGTCAAATCTGGCCCTGCTCTGGGTCCTGTTTCACAGGGGCCCCCTTCCTGGCAGCGAATGCCACCGCAGAACACTTTGTCTATGGCCCGTGTCTGCTGGTCCCCTTAACGCAGTATGGGAGACAAGAAGCAGCAGGGTAGAGCTGGTTTTGAAACCAGACCCTGGCTTTGCCATCCCTTGCCTGCTGTGTGTTTTTGTGTTAGACACCTAATTTCTCTGAGCCTGCCTCTGGAAGGCAAAGCCACGAGAGAGGGCACTCCTGACATTGTGTGAGGCTCAGAAGAGGCTCTGGGTGCCGAGAGGGCTATGTGAGCCTCAAAGGGCGCACGGAAGTGCCACCTGGACCTGCCTTATGCCTGGCCAGGCTGTGTCCTGCAGTTTAGGAGGTCAT…	TAACAAAGGTCAAATCTGGCCCTGCTCTGGGTTCTGTTCCACAGGGGCCCCCTTCCTGGCAGCGAATGCCACCGCAGAACACTTTGTCTATGGCCCGTGTCTGCTGGTCCCCTTAACCCAGTATGGGAGACAAGAAGCAGCAGGGTAGAGCTGGTTTTGAAACCAGACTCTGGCTTTGCCATCCCTTGCCTGCTGTGTGTTTTTGTGTGAGACACCTAACTTCTCTGAGCCTGCCTCTGGAAGGCAAAGCCACGAAAGAGGGCACTCCTGACATTGTATGAGGCTCAGAAGAGGCTCTGGGTGCTGAGAGGGCTATGTGAGCCTCAAAGGGCGCACGGAAGTGCCACCTGGACCTGCCTTATGCCTGGCCAGGCTGTGTCCTGCAGTTTAGGAGGTCAT…
chr4	152572114	152572115	341	13.5	B6xCAST	GGGAAGGGCATTGTGGGGAAAGGGACCAGCAGGCATGCGTGTGTAGGAGTGAGCTGCAGCCCCTCCTTGGAGCCACCGAGCAAGACTGCAGGGAGATGGTGTCTGGATGTTCCCTTCCCATGCCTAGCAGTGGCTGTCACACTCGGGCTGAAGTCCCCTGTCCTTTGCATCTGTAGTTGACTAAGAGTGCTTCAATTCACTGGATGCAGCCATGAGATACCTCATAGACATCACCTACCCTAGGACTCATTAGAGCCCAGACGAGCTGAAGGCTGAGAATGGGGCCTTGCTGCTGCTTCCTCCTCCTCCTCCCCTTCCCCCTCCTTCTTCCCTCCCTCCTCCTCCTCTTCCTCTGGGCTGCTGCTGTGATGGGAAAGCTGTACCCATTTCCTCCTCTTC…	GGAAGGGCATTGTGGGGAAAGGGACCAGCAGGCATGCGTGTGTAGGAGTGAGCTGCAGCCCCTCCTTGGAGCCACCGAGCAAGACTGCAGGGAGATGGTGTCTGGATGTTCCCTTCCCATGCCTAGCAGTGGCTGTCACACTCGGGCTAAAGCCCCCTGTCCTTTGCATCTGTAGTTGACTAAGAGTGCTTCAATTCACTGGATGTAGCCATGAGATACCTCATAGACATCACCTACCCTAGGACTCATTAGAGCCCAAACGAGCTGAAGGCTGAGGTTGGGGCCTTGCTGCTGCTTCCTCCTCCTCCTCCCCTTCCCCCCTCCTTCTTCCCTCCCTCCTCCTCCTCTTCCTCTGGGCTGCTGCTATGATGGGGAAGCTGTACCCATTTCCTCCTCTTC…
chr5	22609573	22609574	102	19	B6xCAST	AGTTTAATAAAAATGAAGCTACAACATGCCCAAACTTATGGAACACAATGCAAGCAGTCCTAAGAGTATCTCTCTCTGTCTCTATGTCTCTCTCTTTCTGTGTGTCCTTCTATATCTTTACTTTATTTGCTCTATGACTCTGTCTGCCTCTACCCCTTCTCCAGTTCCTCACTCCCCTCCCTTCCCTCACAATAAATCCCCCTTATACCAGGTCTGTCTCATGTCATGGTTTCTCAGGGGGACACCTTGGCATAGGCCCACCAGGTACCCCCTAACCCTCGCCACTTTTGTGTTGTATTTCATAACATTGAGGCTAACCTGGTCTATAGGGCAAGTTCTAGGACAGCCACAGTCACACAGAGAATGTTGGGTTTCTGAAATTGCCCTTAAAGCATGCAA…	AGAGTTTAATAAAAATGAAGCCACAACATACCCAAACTTATGGAACACAATGCAAGCAGTCCTAAGAGTATCTCTCTCTGTCTCTATGTCTCTCTCTTTCTGTGTGTCCTTCTATATCTTTACTTTATTTGCTCTATGACTCTGTCTGCCTCTACCCCTTCTCCAGTTCCTCACTCCCCTCCCTTCCCTCACAATAAATCCCCCTTATACCAGGTCTGTCTCATGTCATGGTTTCTCAGGGGGACACCTTGGCATAGGCCCACCAGGTACCCCCTAACCCTCGCCACTGTTGTGTTGTATTTCATAACATTGAGGCTAACCTGGTCTATAGGGCAAGTTCTAGGACAGCCACAGCCACACAGAGAATGTTGGGTTTCTGAAATTGCCCTTAAAGCATAC…
chr5	23774394	23774395	88	16	B6xCAST	ATTTAAAATGGCTTAGCATTTTCAACCCCCTAGGCTCAATCTCCAGAACCAGAAATAACAAAACAAAGGCAGGATGTGATTCATGAATGCCCATAATCCCAGCAAGTGGGGGGCTACAGACTGAGAGCCACAGGCCATCTTAGGCTATACAGTGAGAGCCTGTCTCAAAGTCAAATCAAAGCAAATAGCACAGTGAGTGAGTGGCAGAGAGGGGGAGAGGGAGGGGGAGGGAGAGAGTGAAGGAAAAGGGAGGAGAGGAGGAGGGGGAGAGGGAGAGAGCACAACCTTGCTAGGACCTTTCTACTTGGTATTGTCAGGGATTATGTCTATAGGTAAATTTAGGAATTTCAGAACCTTACATGTTTCCGATTGCTGGAAAGTGGTGGTGGGAAAGGAATG…	ATTTAAAATGGCTTAGCATTTTCAACCCCCTAGGCTCAATCTCCAGAACCAGAAATAACAAAACAAAGGCAGGATGTGATTCATGAATGCCCATAATCCCAGCAAGTGGGGGGCTACAGACTGAGAGCCACAGGCCATCTTAGGCTATACAGTGAGAGCCTGTCTCAAAGTCAAATCAAAGCAAATAGCACAGTGAGTGAGTGGCAGAGAGGGGGAGAGGGAGGGGGAGGGAGAGAGTGAAGGAAAAGGGAGGAGAGGAGGAGGGGGAGAGGGAGAGAGCACAACCTTGCTAGGACCTTTCTACTTGGTATTGTCAGGGATTATGTCTATAGGTAAATTTAGGAATTTCAGAACCTTACATGTTTCCGATTGCTGGAAAGTGGTGGTGGGAAAGGAATG…
chr5	24283368	24283369	71.5	13	B6xCAST	TAGACTGATTTGTGAGCCAGACCCCCAGTATGGTGGTTCCCACTCCAGTCACTGCAGTTCTCACAATGGCACCAACACACCCTCTCCCCTGAAATATCGTTCATCTGTTACTGTATAGTCAGCACAGGATGCAATGCAGGGAAGTGGCTAATACTGAAGGATATTTCCCCCTAGCTATCACAAAACCCCATGGCCCTCCCTGCCAAACGGTCAGAGCATTTGGTGACCTGACTGCTCACATCACTAAAATTCAGTGTCCAGCTCTCTGGCCTGTATTGGGTGGATACTGTCAGCTTTCATCTCTCTGATGTCAATTTTACAGGTCCTCTGTCCCCAAGTCTTGTCTCATTTCTCTTTAAGGTCATCTCCTTGACTCATGTCTGGCCCGGAAGGCACCCG…	CAACTTATTTAGACTGATTTGTGAGCCAGCCCCCCAGTATGGTGGTTCCCATTCCAGTCACTGCATTGGCACCAACACACCCTCTCCCCTGAAATATCGTTCATCTGTTACTGTATAGTCAGCACAGGATGCAATGCAGGGAAGTGGCTAATACTGAAGGATATTTCCCCCTAGCTATCATGAAACCCCATGGCCCTCCCTGCCAAACGGTCAGAGCATTTGGTGACCTGACTGCTCACATCACTAAAATTCAGTGTCCAGCTCTCTGGCCTGTATTGGGTGGATACTGTCAGCTTTCATCTCTCTGATGTCAATTTTACAGGTCCTCTGTCCCCGAGTCTTGTCTCATTTCTCTTTAAGGTCATCTCCTTGACTCATGTCTGGCCCGGAAGGCACCCG…
chr5	24704865	24704866	178.5	15.5	B6xCAST	AAGTGAAAAGAAAGGGACCTTGTCATACCTGCCCAGTTGTACAATGAAGAACCTGATGTAGAGAGTTGGTGGTGTGGTTTCCCTGCAGTATAGCAGTCTGTGGACCACAGTGGAGTAGGAAGCCATTGTAGGAGTGCAGCTATGGGTTGGTTATGTCCTGACCTGCCAGCAGGGCTGTGCAAACGTCTCCCTTCACCACAGTCAGCCTCGATGTTCCAGTCATGGTCCCTGGTCCTGGAAGCAGAAGTCAGGGACAGGTCAGGAGAAGCTGGCTCTGTACCTTGTAGTTGAGTGCCCTAGGAAGTGAGCCTCCCGGACAGCATTCCCACCTGTGCTGCCCCGCCCGCAGTGATGTCTTCAACAATATGGTAGAATACTTTGTAGGTCATAAGTTCTCCC…	AAGTGAAAAGAAAGGGACCTTGTCATACCTGCCCAGTTGTACAATGAAGAACCTGATGTAGAGAGTTGGTGGTGTGGTTTCCCTGCAGTATAGCAGTCTGTGGACCACAGTGGAGTAGGAAGCCATTGTAGGAGTGCAGCTATGGGTTGGTTATGTCCTGACCTGCCAGCAGGGCTGTGCAAATGTCTCCCTTCACCACAGTCAGCCTCGATGTTCCAGTCATGGTCCCTGGTCCTGGAAGCAGAAGTCAGGGACAGGTCAGGAGAAGCTGGCTCTGTACCTTGTAGTTGAATGCCCTAGGAAGCGAGCCTCCCGGACAGCATTCCCACCTGTGCTGCCCCGCCCACAGTGATGTCTTCAACAATATGGTGGAATACTTTGTAGGTCATAAGTTCTCCC…
chr5	38209238	38209239	142.5	18	B6xCAST	ACTCATCTCATTGAGTTCCAAGTCTTTAGAATTTCAGACAATAGCAAAATGAAAAGACACTAAAGACAAGCACACACGCTTTCCTGTTAATGTTATGAAATGATGTGACGGGACCCACCGAAGCCTGGGCCCCCATGTTAGCACTTTAGGACATGGTCGTGACAGTGTCCCCTATTTCCTGCACTTTCACCAAGGATTCGGTGAGTAGGTGCTCTGCCATTAGCCTGGCACCCAGGGCCCTGCTTCTGAACTGCCCCAGAGGGCTTCCTTAACATACAGCCACAAGAGAAGCCACTCCCATCTAGACAGCACTACTGGAAAACAGGGTCTCTTACCCAAGACGGCCCTCTGCCTCTTGGAATGTGGTACCATCTGATTAAAGGTTTGCTTCCTGTTTCC…	ATCTCGTTGAGTTCCAAGTCTTTAGAATTTCAGACAATAGCAAAATGAAAAGACACTAAAGACAAGCACACACGCTTTCCTGTTAATGTTATGAAATGATGTGTCGGGACCCACCGAAGCCTGGGCCCCCATGTTAGCACTTTAGGACATGGTCGTGACAGTGTCCCCTATTTCCTGCACTTTCACCAAGGATTCGGTGAGTAGGTGCTCTGCCATTAGCCTGGCACCCAGGGCCCTGCTTCTGAACTGCCCCAGAGGGCTTCCTTAACATACAGCCACAAGAGAAGCCACTCCCATCTAGACAGCACTACCGGAAAACAGGGTCTCTTACCCAAGACGGCCCTCTGCCTCTTGGAATGTGGTACCTACCATCTGATTAAAGGTTTGCTTCCTGTTTCC…
chr5	41045442	41045443	192	24.5	B6xCAST	ACACTTACAGCAGGGATTTCAGAGCTGAGGTTTAGCCATAGCTTCCGACTTTAAAGTCTATTCCTTTGCCCTGTGCCCCGATGCCTCAATATCTCAAGGCTATTGGTTTTATGAGGAAATAAATTGTAAACAGTCATTCTAAAAGGAAGGCCATGTATATTTTAAGAAAGATTCTCACTTTCCCACTTATGGATAAGTTCATATCACTATTTTTACGAAATCATGGTAACAAGAGACACACTCCATGATTATTTATTTGGGGTGTGACTGACTAGTAAAGATGATTGCATCAGAACTAAAATACCCTAAAAGCAGCAACACCAAGGAGAAGTAGAGGGCACAGGCTAAGCTTCAGACTCCCCTGTTCTATCAGTCCCTGAGCCAGAGCTGGTCATGTGG…	ACACTTACAGCAGGGAGTTCAGAGCTGAGGTTTAGCCATAGCTTCCGACTTTAAAGTCTATTCCTTTGCCCTGTGCCCCACTGCCTCAACATCTCAAGGCTATTGGTTTTATGAGGAAATAAATTGTAAACGGTCATTCTAAAAGGAAGGCCATGTATATTTTAAGAAAGATTCTCACTTTCCCACTTATGGATAAGTTCATATCACTATTTTTACGAAATCATGGTAAAAAGAGACACACTCCATGATTATTTATTTGGGGTGTGACTGACTAGTAAAGATGATTGCATCAGAACTAAAATACCCTAAAAGCAGCAACACCAAGGAGAAGTAGAGGGCACAGGCTAAGCTTCAGACTCCCCTGTTCTATCAGTCCCTGAGCCAGAGCTGGTCATGTGG…
chr5	66269806	66269807	203	31	B6xCAST	CAGTGATGGCTAATTCGTCAAGTCCTCAAGTCCGATGGCTCCGATTCCAAAACACATGCTGAATCTCTTCATTTATTTGCAATTTTACTACCGCTGTCCAAATCCATGCGCTATGAATTAGACTCTCCATTGGATTCCTTGGTTAATTCTTCCTTCCCCATGACCTGGTCCACAGGGTAAGTAAAGTGAAATTTGCTTATCTTTGAGGCAAGGTCTCCTGTCGCCCAGGCTAGCCTTGAACTTGTTGTGTAGCTGAGTCTGGCCTTGAACTCATGATTGCTTTGTCTCCAACTGCTCTCTCAGTTGTTGAGATTACAGCTGTGCAAAACCCTGGTCGATAGAGTGATATAGTTTAAGATATGTAACTCTGCAGTCAAAATAGAATACCATGGATATTTA…	CAGTGATGGCTAATTCGTCAAGTCCTCAAGTCCGATGGCTCCGATTCCAAAACACATGCTGAATCTCTTCATTTATTTGCAATTTTACTACCGCTGTCCAAATCCATGCACTCTGAATTAGACTCTCCATTGGATTCCTTGGTTAATTCTTCCTTCCCCATGATCTGGTCCACAGGGTAAGTAAAGCGAAATTTGCTTATCTTTGAGGCAAGGTCTCCTGTCGCCCAGGCTATCCTTGAACTTGTTGTGTAGTTGAGTCTGGCCTTGAACTCATGATTGCTTTGTCTCCAACCGCTCTCTCAGTTGTTGAGATTACAGCTGTGCAAAACCCTGGTCGATAGAGTGATATAGTTTAAGATATGTAACTCTGCAGTCAAAATAGAATACCATGGATATTTA…
chr5	68721690	68721691	105	13	B6xCAST	TCATCAGAAAGAAGTATACACAGGGAAATAAGATTTATTGAGGACCCATTATGCTATAGGGACCATACCAGCCATTATCCATTAAAAATGAATATAATGAAATTAAGGAATTCTCACCAGTTTCTGTAATTTGGAAAGTTTTCCGGGCCAATAAATGATTCTGAACTGTTCCAGTAATATGGTGGAAACAAATATCTCCTATTGATGTTTAAATGCAAACAACAAATTAAAATGCATGATATATAAGCCATAAAACACTTGAGCAATTTTCCATTGTCTTATGAAGCATAATGATTAATGTTTTCTAAATGCTTTAAAATTAATTTTTAATTCAATTTTTGAGGTATTGATCTTGTGTTCCATGTATCTCTAATAACGAATGTAGCATTTGTTATTTCT…	TCATCAGAAAGAAGTATACACAGGGAAATAAGATTTATTGAGGACCCATTATGCTATAGGGACCATACCAGCCATTATCCATTAAAAATGAATATAATGAAATTAAGGAATTCTCACCAGTTTCTGTAATTTGGAAAGTTTTCCGGGCCAATAAATGATTCTGAACTGTTCCAGTAATATGGTGGAAACAAATATCTCCTATTGATGTTTAAATGCAAACAACAAATTAAAATGCATGATATATAAGCCATAAAACACTTGAGCAATTTTCCATTGTCTTATGAAGCATAATGATTAATGTTTTCTAAATGCTTTAAAATTAATTTTTAATTCAATTTTTGAGGTATTGATCTTGTGTTCCATGTATCTCTAATAACGAATGTAGCATTTGTTATTTCT…
chr5	71639000	71639001	47.5	4.5	B6xCAST	GTATCGGTGTTTGTGGTCCTGTTTTTATTCCAGTAAGTCTGATAGCTTGAAAAGCAGATAGAGCAAACCTCCTAAACTATAGCCGAACTCCTACATCTTTGAATTCTTGTCTATCTGTCCTTAAGAAAACCTGACTTCTTCTGATTCCACACAGTTCTGTCTTCTAGAAATGGACCAAGATGCTGCCTCCAGTACCACAAACAGAACCAAACAAACTTTCCTTGTGAGAGAGCTCTCCAGGGGTCACCCCTTCTAGCCTCTGCTTCTGGCCAGTGCTCAGGCCATTGGGGAACCATCCTGCAGAGTTCAGACTGCTGGCTGCAAAGCTCTCCAGGGTACAGAGTTACACAACCAGTTCCAGTGCCATTTGAATCCTGCAATTAAGGCACTTTCCCTTCT…	ATCGGTGTTTGTGGTCCTGTTTTTATTCCAGTAAGTCTGATAGCTTGAAAAGCAGATAGAGCAAACCTCCTAAACTATAGCCGAACTCCTACATCTTTGAATTCTTGTCTATCTGTCCTTAAGAAAACCTGACTTCTTCTGATTCCACACAGTTCTGTCTTCTAGAAATGGACCAAGATGCTGCCTCCAGTACCACAAACAGAACCAAACAAACTTTCCTTGTGAGAGAGCTCTCCAGGGGTCACCCCTTCTAGCCTCTGCTTCTGGCCAGTGCTCAGGCCATTGGGGAACCATCCTGCAGAGTTCAGACTGTGCTGGCTGCAAAGCTCTCCAGGGTACAGAGTTACACAACCAGTTCCAGTGCCATTTGAATCCTGCAATTAAGGCACTTTCCCTTCT…
chr5	90898596	90898597	307.5	45	B6xCAST	ATTCTTTCTTTTCTGTTCTACCTTATTCATCTTTTACAAATATGTCACTACCTCTGATACATTATACCTAATAAATGTTTTTGGTTTTAATCTTCATCATCACTTTCTTCTCTTATGTGATTTCAACAATGAGAATATCTTACCCTCCTCAGTATAGACAGCAGATAAACTTTACAGTGTGACGTTATGCACATTGGCCATGGAAACAACTTTATGTGAGTAGCAGCCTCCCAGAGGAAGTAATATCCAGAGGAATTGACAAGATTCTAAGGGTCATAGTGCCCCCTTCCTGCACACAGGCTAAAAAGATCAAGAATGGGGGCAGGGAGCAGACTGGGTCTCTAAGGAGGCCATGTCTTGGGGGAGGGAGGAAGGTGAAAAAAAAAAGAGAAAACAAAA…	ATTCTTTCTTTTCTGTTCTACCTTATTCATCTTTTACAAATATGTCACTACCTCTGATACATTATACCTAATAAATGTTTTTGGTTTTAATCTTCATCATCGCTTTCTTCTCTTATGTGATTTCAACAATGAGAATATCTTACCCTCCTCAGTATAGACAGCAGATAAACTACAGTGTGACGTTATGCACATTGGCCATGGAAACAACTTTATGTGAGTAGCAGCCTCCCAGAGGAAGTAATATCCAGAGGAATTGACAAGATTCTAAGGGTCATAGTGCCCCCTTCCTGCACACAGGCTAAAAAGATCAAGAATGGGGGCAGGGAGCAGACTGGGTCTCTAAGGAGGCCATGTCTTGGGGGAGGGAGGAAGGTGAATAAAAAAAAAGAGAAAACAAAA…
chr5	101848032	101848033	167.5	15	B6xCAST	AGGTTTCACAAGCTTCCACAGCCCAGGCTCGCTCTGCCTCCTTCCTTCTTCCCTTTACCCTTTGCTTCCTGACTTCAACTTGAGGATAAGAGGTAAGCTCTCAGCGACTGCTCTTGTGCCCTGCCTGCCTGCCGCCAAGCTCCCCGCCATGACGACCACGAACTCACCCTCTGAAACTGTAAGACCCCCAACTAAATGCTATCTTCTATAGGTCGCCTCGATCATGGCGCCTCCACAGAAACAGAACGGTAACTGAACTAGATAACTGCACAGGGAAACCTCCATTTCCTTCAGAACCTCTCAAGGTCCTGCGTGATGAGTGCAAACTGTCTTAGACATTTAGCAGTGGGAACTGTTGCCTCAAGGACTACAGGCAGGGTGTGTCCCTGCAGGACTGCA…	CTCTGAGGTTTCACAAGCTTCCACAGCCCGGGCTTGCTCTGCCTCCTTCCTTCTTCCCTTTACCCTTTGCTTCCTGACTTCAACTTGAGGATAAGAGGTAAGCTCTCAGCGACTGCTCTTGTGCCCTGCCTGCCTGCCGCCAAGCTCCCTGCCATGACGACCACGAACTCACCCTCTGAAACTGTAAGACCCCAACTAAATGCTATTTTCTATAGGTCGCCTCGATCATGGCGCCTCCACAGAAACAGAACGGTAACTGAGCTAGATAACTGCACAGGGAAACCTCCATTTCCTTCAGAACCTCTCCAGGTCCTGCGTGATGAGTGCAAACTAGACATTTAGCAGTGGGTACTGTTGCCTCAAGGACTACAGGCAGGGTGTGTCCCTGCAGGACTGCAG…
chr5	102699163	102699164	130.5	21	B6xCAST	TTGCTTATCTGGTTTAATTAGATAAGTTTAATTTAGGAACTGTTTTTAAATAGATGTAAGAGGATGGAGTATTCGATGATAAGACATCTCCCGACACCTCCTTATGACTGGTAGAGAAGGGAACAGATGTGTCTTTGTAACACCATTGCTATTCCTGTTAGAAATCTCATCACGAAATAAAACATTCGAAGACTCTGTCTAATAGACTCAGGGGCTTCCCTGTGGTAAGACCTTGTTTCAGTAACTATGGGGTTTGTTGGTTTGGGTTTTGTTTTGTTTTTCCAGTCTCTATAGAGTTTTTCAGTTCTGAGCATTGTAGACTTGGCATCATTAGCAATGTGGCCACTGGGACTGGAGACATGCCCAGTGGTTGAAAGCACGGGCTGTTCTTCCAGAGTA…	TTGCTTATCTGGTTTAATTAGATAAGTTTAATTTAGGAACTGTTTTTAAATAGATGTAAGAGGATGGAGTATTCGATGATAAGACATCTCCCGACACCTACTTATGACTGGTAGAGAAGGGAACAGATGTGTCTTTGTAACACCATTGCTATTCCTGTTAGAAATCTCATCACGAAATAAAACATTCGAAGACTCTGTCTAATAGACCCAGGGGCTTCCCTGTGGTAGGACCTTGTTTCAGTAACTATGGGGTTTGTTGGTTTGGGTTTTGTTTTGTTTTTCCAGTCTCTATAGAGTTTTTCAGTTCTGAGCATTGTAGACTTGGCATCATTAGCAATGTGGCCACTGGGACTGGAGACATGCCCAGTGGTTGAAAGCACGGGCTGTTCTTCCAGAGTA…
chr5	103599125	103599126	144	21	B6xCAST	AGGACAAGGCTTATGCTCCAAGAAAGTGCACAGTGATTCTCTGAGCACCTTGTTGGCAGATTTCACCAAATCCTGACTCAGGTACCCCTAGCCCTAGCCCCCTTTCTAACACCCAGGTCTCCTGCACCCCCTCCCAGCCCTCTCCACTCCAGAGCCATTTCTGATCTTACAAGTACAGCTGTTGCTGGGATTTGTACCTGAGGAGATGAGGCTCTGAAAGCAACAAATATCCCATGTGGTGCCTTTGAGTACCTCACTACCAGGAAACAGGTCTGAGGAGTGACCCTGCCGTAGAATTGGCTCCACAGGACGCAAAACCATCCTCACCTGACTCCCAATCCAAAGCACGGTCATAGGTTAAATTGTAACCAACACCATCATTGTGGGGGTGTGGGGGGG…	AGGACAAGGCTTATGCTCCAAGAAAGTGCACAGTGATTCTCTGAGCACCTTGTTGGCAGATTTCACCAAATCCTGACTCAGGTACCCCTAGCCCTAGCCCCCTTTCTAACACCCAGGTCTCCTGCACCCCCTCCCAGCCCTCTCCACTCCAGAGCCATTTCTGATCTTACAAGTACAGCTGTTGCTGGGATTTGTACCTGAGGAGATGAGGCTCTGAAAGCAACAAATATCCCATGTGGTGCCTTTGAGTACCTCACTACCAGGAAACAGGTCTGAGGAGTGACCCTGCCGTAGAATTGGCTCCACAGGACGCAAAACCATCCTCACCTGACTCCCAATCCAAAGCACGGTCATAGGTTAAATTGTAACCAACACCATCATTGTGGGGGTGTGGGGGGG…
chr5	104426086	104426087	374.5	47.5	B6xCAST	CTACACTCATGATAGACGCCAGGACCACTGGGAACAACAGCTGCCTCAACTTACCACAGCTCTCTGGAAACAGTGTATTTCAGGAAAACGAGTGTCGGGTGCAGAATTTTTATTGCTTTCATAAGTGGAAAAGCAGAATACTTTTCATTTATTTACATGCCAGTCAGAAACTACAGACTTAAGTGAAAATCTTCACCTTTCACTTCTGACGTCACAACACCAGATCATTACAATGTAAAGTTAATTACCAAGCGATGGGGACCTGATGAAAGGAGATGTGTTTAAGAGAGACCTTCCGAGAGATCAATGCCAGAGTTTGACTTGTGTCTGGACCAGTTCTCCGTAAACACGAACAAAGGCGAAACTCAAGTCTGAGGAGCTTCAGAAATGGGCAAAAGC…	ACTACACTCATGATAGACGCCAGGACCACTGGGAACAACAGCTGCCTCAACTTACCAAAGCTCTCTGGAAACAGTGTATTTCAGGAAAACGAGTGTCGGGTGCAGAATTTTTATTGCTTTCATAAGTGGAAAAGCAGAATACTTTTCATTTATTTACATGCCAGTCAGAAACTACAGACTTAAGTGAAAATCTTCACCTTTCACTTCTGACGTCACAACACCAGATCATTACAATGTAAAGTTAATTACCAAGCGATGGGGACCTGTGAAAGGAGATGTGTTTAAGAGAGACCTTCCGAGAGATCAATGCCAGAGTTTGACTTGTGTCTGGACCAGTTCTCCATAAACAAAAACAAAGGCGAAACTCAAGTCTGAGGAGCTTCAGAAATGGGCAAAAGC…
chr5	107020137	107020138	638.5	98.5	B6xCAST	GATTTTATGATACTAAAGGCTTGTAATTAGTCTTTAGATATAATAATAACATCATACCTATGTTTTAAGGGGAGACTTCTTTTAGAGTCTCATATAAAGCTGCTGACGAGGAATTTGTATGGCTGATGGGACAGGGAACAACTGGGCGGATATAAAGTAGTAACAGCCGTGAGTCCCTAACTGGAGCCGGAGCCACCGTTTTCTGGAGTTTGAAACCTTCCTTGTGCATTCATTCTTTCCCTTTCCAAGTTCTAGTAACTTTCCATAATACAAAGTTTGAAAATAGCACCTACTAAGTACTAGGCCCTAGACTGATATTGACCTCAGCCATGAATTTGCATCATAGAAAAACTCAGTCAAAACCTTTCCCTCATGGCTGAGTCGTGTGGGAAGGGAGAA…	GATTTTATGATACTAAAGGCTTGTAATTAGTCTTTAGATATAATAATAACATCATACCTATGTTTTAAGGGGAGACTTCTTTTAGAATCTCATATAAAGCTGCTGACGAGGAATTTGTATGGCTGATGGGACAGGGAACAACTGGGCGGATATAAAGTAGTAGCAGCTGTGAGTCCCTAACTGGAGCCGGAGCCACCATTTTCTGGAGTTTGAAACCTTCCTCGTGCATTCATTCTTTCCCTTTCCAAGTTCTAGTAACTTTCCATAATACAAAGTTTGGAAATAACACCTACTATGTACTAGGCCCTAGACTGATATTGACCTCAGCCATGAATTTGCATCATAGAAAAACTCAGTCAAAACCTTTCCCTCATGGCTGAGTCGTGTGGGAAGGGAGAA…
chr5	111159722	111159723	205	28	B6xCAST	ATACACATGCACACACAGGCTTGTATACACACACACACAGGCTTGTATATACACACATGCACAGGCTTATATGCATGCACACACACAGGTTAGTATGCACACACAAACAAATCATGCATATGCTGGCACTTTTGGGGTGTGTGTGTGTGTGTGTGTGTGTGTGGTTAGTGTACCATTGTAGCATCTGCCCTGCTGGAATCTCCCTCTCCCTGTTGGATACAAAGGAACAGTAGCTACAGTGTCCATGTGTAGGATCTCCAGATGACAGGATGTCTGTTGCCAAGGGAAGTCTCCGTTGATGGCCATCAAAATACTGAAGCTCTGAGATTTATAATCACAAGGGGCTGAGTGTTACCCAGACTGGGGAGCAGGTTTCCCCTGGGCACAGTCTCCAAATGA…	ATACACATGCACACACAGGCTTGTATACACACACACACAGGCTTGTATATACACACATGCACAGGCTTATATGCACGTACACACACAGGTTTGTATGCACACACAAACAAATCATGCATATCCTGGCACTTTTGGGGTGTGTGTGTGTGTGTGTGTGTGTGTGGTTAGTGTACCATTGTAGCATCTGCCCTGCTGGAATCTCCCTCTCCCTGTTGGATACAAAGGAACAGTAGCTACAGTGTCCATGTGTAGGATCTCCAGATGACAGGATGTCTGTTGCCAAGGGAAGTCTCCGTTGATGGCCATCAAAATACTGAAGCTCTGAGATTTATAATCACAAGGGGCTGAGTGTTACCCAGACTGGGGAGCAGGTTTCCCCTGGGCACAGTCTCCAAAGGA…
chr5	113570523	113570524	221	22.5	B6xCAST	AACAGGTTGGGGAGGAAAGGGTTAATTCAGCTTACACTTCCATGTTGCTGTTCATCACCAAAGGAAGTCAGGACAGGAACTCACATAGGACAGGAACCTGGAGGCAGGAGCTGATGCAGAGGCTATGGAGGGATATTTCTTACTAGCTTGCATCCTTTAGCTTGCTCAGCTTGCTTGTTTATAGAACCCAGGGATGGCTCCACCCACAATGGGATTGCCCTACCACAACGGGATGGCCACACCCACAATGAACTGGCTCCACCCACAATGGGCCCTCCTCCCCTGAGGAGTATGAGGTTGAGGCAAGCTGATCAGTAATTGACAGCTGGATCTCACGGAGGCATTTCCTCAAGGGAGGCTCCTTTCTCTGTGACAACTCCAGCCTGTGTCAAGCTGACA…	AACAAGTTGGGGAGGAAAGGGTTAATTCGGCTTACACTTCCATGTTGCTGTTCATCACCAAAGGAAGTCAGGACAGAAACTCACATAGGACAGGAACCTGGAGGCAGGAGCTGACGCAGAGGCCATGGAGGGATATTTCTTACTAGCTTGCATCCTTTGGCTTGCCCAGCTTGCTTGTTTATAGAACCCAGGGATGGCTCCACCCACAATGGGATTGCCCTACAACAATGGGATGGCCACACCCACAATGAACTGGCTCCACCCACAATGGGTCCTCCTCCCCTGAGGAGTATGAGGTTGAGGCAAGCTGATCAGTAATTGACAGCTGGATCTCCCGAAGGCATTTCCTCAAGGGAGGCTCCTTTCTCTGTGACAACTCCAGCCTGTGTCAAGCTGACA…
chr5	113599580	113599581	168	14.5	B6xCAST	TCAAGGCTGAAACATGGGAGCATCCAGGGAGGCACAGTGCAGAAATAGCTGAGAGTTCTACATCTTCATCTGAAGGCAGACAGGAGAAGATTGTCTTCCAAGCAGCTAGGACAAGGGCCTTAAAGTCTAAGCTCACAGTGATTTACTTCCTCCAACAAGGCCGCACCCCCTCCAACAAGGCCACACCTCCTCCAACAAGGCCACACCTCCAAATAGTGCCACTCCCTGGGCCAAGCATCTTCAAACCACCACAGCAAGCAATGGATCCTTTCTGTCGACCATTAAAAATGAGCCAGAGTTTGCAGGATGTGGCATAGTGGTTAAGAGCACTCCTGCTTACTGCTGAGGACCTGGGTTTGTTTCCCACCATCCACGAGTTGGCTCACAACCATCTCTAAC…	TCAAGGCTGAAACATGGGAGCATCCAGGGAGGCACAGTGCAGAAATAGCTGAGAGTTCTACATCTTCATCTGAAGGCAGACAGGAGAAGATTGTCTTCCAAGCAGCTAGGACAAGGGCCTTAAAGTCTAAGCTCACAGTGATTTACTTCCTCCAACAAGGCCGCACCCCCTCCAACAAGGCCACACCTCCTCCAACAAGGCCACACCTCCAAATAGTGCCACTCCCTGGGCCAAGCATCTTCAAACCACCACAGCAAGCAATGGATCCTTCCTGTCGACCATTAAAAATGAGCCAGAGTTTGCAGGATGAGGCATAGTGGTTAAGAGCACTCCTCCTTACTGCTGAGGACCTGGGTTTGTTTCCCACCATCCACGAGTTGGCTCACAACCATCTCTAAC…
chr5	127766821	127766822	96.5	3	B6xCAST	GAGATGAGGGTCTAACATGTATTGTGTTGTGCACTGTGAAGAGGTGAGTCCCCCATGGGCAAAAGTCATGACCCCAGCACACACATGAGACTCCATGTCTGTCAGGCACTTGCCGTTAATTTGGATTTTTTCCTCCCCTGACATGTTCAGATGATTACTATTGTTTTCATGTTTTGTATGTGAAGAAGCAACAGGCATGAGGAGGTAAGTATTGTATCTAATTGTTGAAGCAGCCAAGAATTCAAGCTGAGGTAGTTGGGTTCCATGCCTATGACTTTGACTACGATACCATACTCCTCCCATAGTGTGCCAATCAACCACAAGGCAGGCCAACGAGACACATCCAGGCCATTTAGACCCCACCTTTGGTCCTGTTGTTATTTCCAGAGCATAATAATT…	GAGATGAGGGTCTAACATGTATTGTGTTGTGCACTGTGAAGAGGTGAGTCCCCCATGGGCAAAAGTCATGACCCCAGCACACACATGAGACTCCATGTCTGTCAGGCACTTGCCATTAATTCGGATTTTTTCCTCACGTGACATGTTCAGATGATTACTATTATTTTCATGTTTTGTATGTGAAGAAGCAATAGGCATGAGGAGGTAAGTGTTGTATCTAATTGTTGAAGCAGCCAAGAATTCAAGCTGAGGTAGTTGGGTTCCATGCCTATGGCTTCGACTACAATACCATACTCCTCCCATAGTGTGCCAATCAACCACAAGGCAGGCCAACGAGACACATCCAGGCCACTTAGACCCCACCTTTGGTCCTGTTGTTATTTCCAAAGCATAATAATT…
chr5	133253359	133253360	73.5	7	B6xCAST	GTAAATGCTGAGAGGTAATAATTACAAATATGAGATGGAAGAGGGTTCCCGTGTGGAAGGCCAAGCTCCCTAGAGAAGGTGATTTGTGCTGCTACTCAGAGAAGAAGGCAAAGTAGTAAGGCCTTCTTGTTTGCTGGATGCTTACCATGCATTCATTAACCGCATTCCCGGCCTTGGGGAGGGTTGTGACTTGGACTTCAAATCTCTAATCTACACCTAACTAGCAAGAGGAAGAAAAGAGCCATAGCTTGTGTGTATGCACACATGCAACATCTGATTTGAACTTGGTATTTTGTGAATTGATGTGATTTATAGACACCTCCCAAATAAGTGCACAGTACTCCGGGAAGAGATGCATAAAATACCAGTGTTCATTCCGCTGACGCTGTGCGGCAGAAA…	GTAAATGCTGAGAGGTAATAATTACAAATATGAGATGGAAGAGGGTTCCCATGTGGAAGGCCAAGCTCCCTAGAGAAGGTGATTTGTGCTGCTACTCAGAGAAGAAGGCAAAGTAGTAAGGCCTTCTTGTTTGCTGGATGCTTACCATGCATTCATTAACTGCATTCCCGGCCTTGGGGAGGGTTGTGACTTGGACTTCAAATCTCTAATCTACACCTAACTAGCAAGAGGAAGAAAAGAGCCATAGCTTGTGTGTATGCACACATGCAACATCTGATTTGAACTTGGTATTTTGTGAATTGATGTGATTTATAGACACCTCCCAAATAAGTGCACAGTACTCCGGGAAGAGATGCATAAAATACCAGTGTTCATTCCGCTGACGCTGTGCGGCAGAAA…
chr5	146766063	146766064	87	16.5	B6xCAST	GAATGAACTAAACTCAGCCCCAATTAAATATTGACTTATAAGAATTGCCTTGGTCATGGAGTCTGTTCACAGCAGGAAAACCCAAATTAAGACAACACACACACACACACACACACACACACACACACACACACACACGCCCTTCTTTTGTTTTTCAATACAGGGTTGTCCTGGAACACACTATGTAGACTACTAGGCTGGCCTTGAACTCACAGAGATCCTCCAGCCTCTGCCTCCTAAGAGCTGGGATTAAAGATGTGTGCCACCATTCCTGGCTTTAAAAACTTCGAAGAGGGGGCTGGAGAGATGGCTCAGCGGTTAAGAGCACTGACTGCTCTTCCAGAGGTCCTGAGTTCAATTTCCAGCAACCACCATAAATGATTGCTGGTGGCTCAAAGC…	GAATGAACTAAACTCAGCCCCAATTAAATATTGACTTATAAGAATTGCCTTGGTCATGGAGTCTGTTCACAGCAGGAAAACCCAAATTAAGACAACACACACACACACACACACACACACACACACACACACACACACGCCCTTCTTTTGTTTTTCAATACAGGGTTGTCCTGGAACACACTATGTAGACTACTAGGCTGGCCTTGAACTCACAGAGATCCTCCAGCCTCTGCCTCCTAAGAGCTGGGATTAAAGATGTGTGCCACCATTCCTGGCTTTAAAAACTTCGAAGAGGGGGCTGGAGAGATGGCTCAGCGGTTAAGAGCACTGACTGCTCTTCCAGAGGTCCTGAGTTCAATTTCCAGCAACCACCATAAATGATTGCTGGTGGCTCAAAAC…
chr5	146884083	146884084	289.5	22.5	B6xCAST	ATTGGGATGTTCTGGGAGGAAAGTGAAGACCCTGCTCACACCTCCCAGTTTCCAGCTATGAATTGAGTGGCCATGGGTGGAGAGCACGCCTGGTATGGGGCGTGGCTACGACGCCGGTTGTTCATAGAGTGACGGGAAGGATGGGTGGTTAGGAGCGGTAGAGCGAGCTCCAGCTAGACCCTGCTGAGGAATACCAACAGTGCATACCATGGAGCCTTGGTAATGGTTTTAAGGGAATACTTGTAAGAATGGATTCTTCAGTATTGAGAGAGAAGTGTTCTAATGGCTGAATAGCCTTTTCTGTTACCTTTCTACAAGCATGGTTCCAAGCCCACCCAGCATCCCTGGGTGGCACATTTTCCTTCCCGTGGTCCCTGTGTGAGAAGCGGCATTCAGGGT…	ATTGGGATGTTCTGGGAGGAAAGTGAAGACCCTGCTCACACCTCCCAGTTTCCAGCTATGAATTGAGTGGCCATGGGTGGAGAGCACACCTGGTATGGGGCGTGGCTACGATGCCGGTTGTTCATAGAGTGACGGGAAGGATGGGTGGATAGGAGCGGTAGAGTGAGCTCCAGCTAGACCCTGCTGAGGAATACCAACAGTGCATACCATGGAGCCTTGGTAATGGTTTTAAGGGAATACTTGTAAGAATGGATTCTTCAGTATTGAGAGAGAAGTGTTCTAGTGGCTGAATAGCCTTTTCTGTTACCTTTCTACAAGCATGGTTCCAAGCCCACCCAGCATCCCTGGGTGGCACATTTCCCTTCCCGTGGTCCCTGTGTGAGAAGCGGCATTCAGGGT…
chr6	15056886	15056887	407	31	B6xCAST	AAAAAAAAAAAAAAAAAAAAAAAAAAAGAGTTACAGAACAAATGAAACTTCAGATATCTAGTTTTAATCCTTCACTTGATAATTGAAGAAGGTAAACCTTGTACTAATTTTTCCCATAGTTAGCTAGTAACCCAGCCCAGATTTTCAATCTCAGCCTTGTGCTCACAATTTTATTGTAATCTTGGTGCTGTCAATCTCACTACCACAGCCACAGTGATCTTTACTCCAAGTTCTTGGATTTCTTTCCCTGCGATCCCCTCTAAAGCAATCTCTGCTACATATCCAGCTAGAGCTGTAGGAGGCTTTGTGTACTCTTTGGATGGTGGTTTAGTCCCTCAGAACTTTGGGTGGGGGCTCTGGTTCATTGATATTGCTGTTCTTCCTATGGGCTTGCAAATC…	AAAAAAAAAAAAAAAAAAAAAAAAAAAGAGTTACAGAACAAATGAAACTTCAGATATCTAGTTTTAATCCTTCACTTGATAATTGAAGAAGGTAAACCTTGTACTAATTTTTCCCATAGTTAGCTAGTAACCCAGCCCAGATTTCCAATCTCAGCCTTGTGCTCACAATTTTATTGTAATCTTGGTGCTGTCAATCTCACTACCACAGCCACAGTGATCTTTACTCCAAGTTCTTGGACTTCTTTCCCTGTGATCCCCTCTAAAGCAATCTCTGCTACATGTCCAGCTAGAGCTGTAGGAGGCTTTGTGTACTCTTTGGATGGTGGTTTAGTCCCTCAGAACTTTGGGTGGGGGCTCTGGTTCATTGATATTGTTGTTCTTCCTATGGGGTTGCAAATC…
chr6	39447990	39447991	616.5	27	B6xCAST	GTAGCAGCAGAGGCGAGAAGAGGACATCTGATCCCCTGGGACAGGAATTACAGACTGTTGTTACCTGTCACTTGGGTCCAGGGAACTGAATCCAAATCATCTCCCAGATCCTTTGTAAGAGTAGCCAGCACTAAACTGCTGAGTCATCTTTCTAGTCCTGCAACCCATTTCTAAAAAAAAAAAAAAAAAAAGAAAAAAGAACAATTTTATAAAAAAGAGGAAATATGGAAATGTTCTCCCTACCAGGCACCAGGCACATTTCTCCTCTTGCTGAACTAAGTTGTTGTGTAACTTTTTCTGATGTGACAAACATCTATTATCTCAGGTATCACACTGTCAAGAGACCAAAGGAACCTTTCTATCCAAGTCTGGCTTAGTTTCCTGGGGTGAGTTTCAGCA…	GTAGCAGCAGAGGCGAGAAGAGGACATCTGATCCCCTGGGACAGGAATTACAGACTGTTGTTACCTGTCACTTGGGTCCAGGGAACTGAATCCAAATCATCTCCCAAATCCTTTGTAAGAGTAGCCAGCGCTAAACTGCTGAGTCATCTTTCTAGTCCTGCAACCCATTTCTAAAAAAAAAAAAAAAAAAAGAAAAAAGAACAATTTTATAAAAAAGAGGAAATATGGAAATGTTCTCCCTACCAGGCACCAGGCACGTTTCTCCTCTTGCTGAACTAAGTTGTTGTGTAACTTTTTCTGATGTGACAAACATCTATTATCTCAGGTATCACACTGTCAAGAGACCAAAGGAACCTTTCTATCCAAGTCTGGCTTAGTTTCCTGGGGTGAGTTTCAGCA…
chr6	42513692	42513693	369.5	5	B6xCAST	GAAGTAGATAGTTTTGCTAATGAAATGAGTACTTTGGGGAGCATAAGATGACTGAAACTCTTCTTATTTTATAAGAACCAAGACTTTATGTGATGTATGTTAGATTTAGTCTAAATGAGGGAGAAACGTTATTCCCATGGTTCAGATCTGAGAACATGAGGGTAAGAAAGAATAGTTATTTTCTACTGTGAATTCAGTTTGTGTAGTAAATAAGTCTCTTTATTTGCAGAACTCAAAGATAAGAGATTTTGTGGTCTGGGTCTGGAATCCTATCCCCACCATGACATTTCCTGAGCCACTGTCCATACAGCATGAATTAGGGAGAGCATGGCTGATGTCTAACAGGAAGGATTTTGCAATCTGTATACCCAAGTTGATCTCTTGGCTTCACTGTGAATT…	AAGTAGATAGTTTTGCTAATGAAATGAGTACTTTGGGGAGCATAAGATGACTGAAACTTTTCTTATTTTATAAGAACCAAGACTTTTATGTGATGTATGTTAGATTTAGTCTAAATGAGGGAGAAAAGTTATTCCCATGGTTCAGATCTGAGAACATGAGGGTAAGAAAGAATAGTTATTTTCTACTGTGAATTCAGTTTGTGTAGTAAATAAGTCTTTTTATTTGCAGAACTCAAAGATAAGAGATTTTGTGGTCTGGGTCTGGAATCCTATCCCCACCATGACATTTCCTGAGCCACTGTCCGTACAGCATGAATTAGGGAGAGCATGGCTGATGTCTAACAGGAAGGATTTTGCAATCTGTATACCCAAGTTGATCTCTTGGCTTCACTGTGAATT…
chr6	54167219	54167220	399	34	B6xCAST	AGCACCCCACTCCTGTCACAGACACACTGCAGCACAAACAGAGGCAGCACCCCACCCCTGTCACAGACACTGCAGTGCACACGGAAGCAGCACCCCACTCCTGTCACACACACTGCAGTAACACAGAGGCAGCACCCCACTCCTGTCACAGACACTGTAGTCACACAGAGGCAGCACCCCACTCCTGTTACTGTCTTTTGCTCTCAATCGGTCCCAACTCATTCTGGACCCATTAAGCTAATCACACTATAAACCCTGAAGTGCCTTCTCATTGTGTGGCTGCCCTGGAACTGACTGAGAAACCTGTTTTCACGCAATTTCTCTGGAAGAAGTCCCCTGCAGCCCATTTGCAAATGTGTGCATCGATAAATCAAAAGTGGCAGTGGAGGGCTGGCATTT…	AGCACCCCACTCCTGTCACAGACACACTGCAGCACAAACAGAGGCAGCACCCCACCCCTGTCACAGACACTGCAGTGCACACGGAAGCAGCACCCCACTCCTGTCACACACACTGCAGTAACACAGAGGCAGCACCCCACTCCTGTCACAGACACTGTAGTCACACAGAGGCAGCACCCCACTCCTGTTACTGTCTTTTGCTCTCAATCGGTCCCAACTCATTCTGGACCCATTAAGCTAATCACACTATAAACCCTGAAGTGCCTTCTCATTGTGTGGCTGCCCTGGAACTGACTGAGAAACCTGTTTTCACGCAATTTCTCTGGAAGAAGTCCCCTGCAGCCCATTTGCAAATGTGTGCATCGATAAATCAAAAGTGGCAGTGGAGGGCTGGCATCT…
chr6	58711574	58711575	136.5	8	B6xCAST	ACTAGCAGTCAGTTCCATTCTCACCGGGAGTAGGGGCAGTGGGGTCTCAGGCTCTGATGCAGCAGGGTGATTTTGTCTTTCATGGCTTTGAGAGATCCTCCCTTGAGGACCAAAGTGGAAGCTTAAACTTCCCTTTGCCCCTATGTCAAGAAAAAGGATAAGCTGGATTCTAAGAACAGACCCCAAGGAATCAATCATCTTTCTGGGGAGCAAGGATAGGAGAGCACACACTTCCACTCAGTGGACCTGGGGAAGATCCATGGAGAAGACCATTCCTCTGCTTGTCCTTGCTCTTCCTTGCAGCTCTCAAGGTGAAAGGTATGAATGTTTTGTTTCAGAGAGTTGTTATCATATGTGAGCTCTGAGGTAGGGGCCATTCTTAGCTGGACTGGGATAGAT…	GACTAGCAGTCAGTTCCATTCTCACCGGGAGTAGGGGCAGTGGGGTCTCAGGCTCTGATGCAGCAGGGTGATTTTGTCTTTCATGGCTTGAGAGATCCTCCCTTGAGGACCAAAGTGGAAGCTTAAACTTCCCTTTGCCCCTATGTCAAGAAAAAGGATAAGCTGGATTCTAAGAACAGACCCCAAGGAATCAATCATCTTCCTGGGGAGCAAGGATAGGAGAGCACACACTTCCACTCAGTGGACCTGGGGAAGATCCGTGGAGAAGACCATTCCTCTGCTTGTCCTTGCTCTTCCTTGCAGCTCTCAAGGTGAAAGGTATGAATGTTTTGTTTCAGAGAGTTGTTATCATATGTGAGCTCTGAGGTAGGGGCCATTCTTAGCTGGACTGGGATAGAT…
chr6	72315513	72315514	157.5	15	B6xCAST	AGTGACATGGCTCAGCAGGTAAAGAACTGCACAAGCCGGATACTCTGAATTTGATCCCTGGAACCTAGGGTTGTGGGAGAGTTGACTCCCACGTAATCCTCTGACCTCCCACACTTACACCATGGCACATGTGACCCCCTCCTGGTATATGCTTACAATTAATGATAACAATCAATTTCTCTTAAGTCAGGAAATCCCTGACCTGGGTGAGGCTGAGCACCACACACTCTGGTCATTATGGTTCCGTATTGAAGATGTTCTGCTGCTAAGATAAACAGTTTCTAGAGCTGAGGGGATAGACAGCTCAGTGATAGAGTGCTAGTCTAACATGCTCTGGACCCTGGGTTTTATCCCAGCACTGAAAACAAGTGAGCACAGAGAGGGGACAGATTCTCTTGT…	CAGTGACATGGCTCAGCAGGTAAAGAACTGCACAAGCCAGATACTCTGAATTTGATCCCTGGGACCTAGGGTTGTGGGAGAGTTGACTCCCACGTAATCCTCTGACCTCCCACACTTACACCATGGCACATGTGACCCCTCCTGGTATATGCTTACAATTAATGATAACAATCAATTTCTCTTAAGTCAGGAAATCCCTGACCTGGGTGAGGCTGAGCACCACACACTCTGGTCATTATGGTTCCGTATTGAAGATGTTCTGCTGCTAAGATAAACAGTTTCTAGAGCTGAGGGGATAGACAGCTCAGTGATAGAGTGCTAGTCTAACATGCTCTGGACCCTGGGTTTTATCCCAGCACTGAAAACAAGTGAGCACAGAGAGGGGACAGATTCTCTTCT…
chr6	73269234	73269235	356.5	8	B6xCAST	AGGGCGGGGCAGGGCAGGGCAGGCAAGCCCCTTGAACTGCTCTTCTACCATAGACCCTGGTTGTGAAGTTAGGTGTTCTCAGCATAGGCTTGGTGCAGTAAGGAAGTTAAATGTGAGACTGGCTGAATTAGGGAGGGAGCTTACCAACTATTCTAAGAATGTGAACATTCTTAGAAAAACAGTTGCAGGGAGGATGTAGGTAGTATTGCTAAATACAATTAATTCTGATTTTTCATGGTTTAGTGATGGGGTACCTAAAGCCAGTCTGTTCCACTGCCTTAAGCAGGATAAAGCTTACCAAGGTCATATTAATATTATCCTCTCTGTAAAAATTCCCAAAAGAGGGGTTTTAAGGTTTTTTTTTTTTTTTGTTGTTGTTGTTTCTTTGTTTTGGCATTG…	GGGCAGGGCGGGGTGGGGCAGGGCGGGGCAGGGCAGGGCAGGCAAGCCCCTTGAACTGCTCTTCTCCCATAGACCCTGGTTGTGAAGTTAGGTGTTCTCAGCATAGGCTTGGTGCAGTAAGGAAGTTAAATGTGAGACTGGCTGAATTAGGGAGGGAGCTTACCAAAAGAATGTGAACATTCTTAGAAAAACAGTTGCAGGGAGGATGTAGGTAGTATTGCTAAATACAATTAATTCTGATTTTTCATGGTTTAGTGATGGGGTACCTAAAGCCAGTCTGTTCCACTGCCTTAAGCAGGATAATGCTTACCAAGGTCATATTAATATTATCCTTTCTGTAAAAATTCCCAGAAGAGGGGTTTTAAGGTTTTTTTGTTGTTGTTTCTTTTTTTGGCATTG…
chr6	76803176	76803177	297.5	31	B6xCAST	GCCTGTGACACAAGGTAGCTGGAACCCAGCAAGAGTGAAAGCCAAAGTGTTATTCCTTAGTTGGGTGGTTGACATCCTGGTCCTGATAGCATCTAGTAATTATGAGGTCTCATCTTTTCTGCCCCTGATTTTTTTGTCTTGTTTTGTTTTTGTTCCTGTTTTGTCTTTATATTATAACTCTCCTTTTTACTTTTCAAATTAACATATACATGTATATGTTTGCGTGTGGCTAGGTGTGTGCCTGTGAGTACAGGCACAGGTAGAGGCAAGAAAAAGGTGTCAGATTGCTGAGGTTGGGATTATTGACCACTGTGGATCTCTGAATGGGCAGAGTGAAAAATGAGCTCTTGTCCTTGGCAAGAACAGTCTATGCTTTTTTTTTTCCATTTTTTATTAGGT…	CCTGTGACAAAAGGTAGCTGGAACCCAGCAAGAGTGAAAGCCAAAGTGTTATTCCTTAGTTGGGTGGTTGACATCCTGGTCCTGATAGCATCTAGTAATTATGAGGCCTCATCTTTTCTGCCCCTGATTTTTTTTGTCTTGTTTTGTTTTTGTTCCTGTTTTGTCTTTATATTATAACTCTCCTTTTTACTTTTCAAATTAACATATACATGTGTATGTTTGCATGTGGCTAGGTGTGTGCCTGTGAGTACAGGCACAGGTAGAGGCAAGAAAAAGGTGTCAGATTGCTGAGGTTGGGATTATTGACCACTGTGGATCTATGAATGGGCAGAGTGAAAAATGAGCTCTGGTCCTTGGCAAGAACAGTATATGCTTTTTTTTTTCCATTTTTTATTAGGT…
chr6	83889001	83889002	71	5	B6xCAST	AGAAGAAGAAGAAGAAGAAGAAGAAGCTGCCGGCCATGAGCATGTGGGAAGGGGATGGGGAGAGAGAAGGGAAGGGGCAAGAGGACAGGGCTAGAGCAAGAAGGCAAGAGAGAGAGAGGAGGGGGCAAGCAGCCCCTTTTATAGCAAGTCAGACAGACCTGGCTATTGTTAGGTAACTGTGGAGTGGGGCATAGACAAAATACCAACAGTTTTATTTTGCAGAGGTCCAGCAAGCTGAGGTCTCCCATGACCAAGACAGAGAGAAAACCAAGTGAGTTTGCAGGCCTGATTTAAAGCACGTTAGGTAATTCTGGGGTAGGTGGCCTATATGTTAATCTGTTGGGTCCATCTCTATGGACATTCCATTACTGGGGTGTGGGACCTAGAAACCTGCTTGGG…	AGAAGAAGAAGAAGAAGAAGAAGAAGCTGCCGGCCATGAGCATGTGGGAAGGGGATGGGGAGAGAGAAGGGAAGGGGCAAGAGGACAGGGCTAGAGCAAGAAGGCAAGAGAGAGAGAGGAGGGGGCAAGCAGCCCCTTTTATAGCAAGTCAGACAGACCTGGCTATTGTTAGGTAACTGTGGAGTGGGGCATAGACAAAATACCAACAGTTTTATTTTGCAGAGGTCCAGCAAGCTGAGGTCTCCCATGACCAAGACAGAGAGAAAACCAAGTGAGTTTGCAGGCCTGATTTAAAGCACGTTAGGTAATTCTGGGGTAGGTGGCCTATATGTTAATCTGTTGGGTCCATCTCTATGGACATTCCGTTACTGGGGTGTGGGACCTAGAAACCTGCTTGGG…
chr6	106982156	106982157	269.5	44.5	B6xCAST	TAATGCCACTAGAACACACATTTTAAAAACTATTAAGTCAGTCTAATTTACATGTATTTTACCATAATACTAAAGGGAAACAAAATATCCATGGCTACCACATGAAGTGACAAAGGATTATGAGAGGAAATTCTCTGTAGATTCCATGCAAGGCACAAATATTTCTATGCCACATCTTATTTTTAACACACTGCAAAAGGAGAGGTTGTTTAGGAGTAAGCTTATCTTCCCAGGTATTTTGCCACAGAGACTAACATAAATATGTATGAAAGTTGATTATCAGAAATATGGATCTCCATAAATATATCCTATTTCATATCAGCTCCTGTTGTTAGACTAGATTCCTCATAAACAGCGACTACTTCATGTTCACTTAGTACCATTGGATAGTGCATAATA…	CCACTAGAACACACATTTTAAAAACTATTAAGTCAGTCTAATTTACATGTATTTTACCACAATACTAAAGGGAAACAAAATATCCATGGCTACCACATGAAGTGACAAAGGATTATGAGAGGAAATTCTCTGTAGATTCCATGCAAGGCACAAACATTTCTATGCCACATCTTATTTTTTATTTCTCACACTGCAAAAGGAGAGGTTGTTTAGGAGTAAGCTTATCTTCCCAGGTATTTTGCCACAGAGACTAACATAAATATGTATGAAAGTTGATTATCAGAAATATGGATCTCCATAAATATATGCTATTTCATATCAGCTCCTGTTGTTAGACTAGATTCCTCATAAACAGTGACTACTTCATGTTCACTTAGTACCATTGGATATTGCATAATA…
chr6	109799453	109799454	197.5	18.5	B6xCAST	TCATGCCCATACCTGAACCAACCTGTGAATATGGCAAAAGGGGATAGTTTTTGTCTGGCTTTCTGTTTCCCTTTTAGATGAAGAGGGCCTCTCTAGTGTAGACTTATGAGAAGAGAATGGGTGATTCCTCAGAACAACTTCACAACCATCTTAGCAGGAATAGGTTTATTGAGTGCTTGGTATCCGAATAACTGATCTGCACCAATTTGTCACATCTTTTTAGTCTCTCCATAACTTCTATGAAAGACTGTGGCTTAATATCATATATTAGCAGAAAAAGAAATGGAAGTAAAAGTATTAAAGTCACACAGGGTTCATGGGCAGAGCTGAGCTATAAACATAGTGTAGAGGAATTTTAATCCAGCAACTTGTCTACTCTGTGCAGAATACAGACACACC…	ATACCTGAACCAGCCTGTGAATATGGCAAAATGGGATAGTTTTTGTCTGGCTTTCTGTTTCCCCTTTAGATGAAGAGGGCCTCTCTAGTTCTCTAGTGTAGACTTATGAGAAGAGAATGGGTGATTCCTCAGAACAACTTCACAACCATCTTAGCAGGAATAGGTTTATTGAGTGCTTGCTATCCGAATAACTGATCTGCACCAATGTGTCACATCTTTTTAGTCTCTCCATAACTTCTATGAAAGACTGTGGTTTATTATCATATATTAGCAGAAAAGGGAATAGAAGTAAAAGTGTTAAAGTCACACAGGGTTCATGGGCAGAGCTGAGCTTTAAACATAGTGTAGAGGAATTTTAATCCAGCAACTTGTCTACTCTGTGCAGAATACAGACACACC…
chr6	118708650	118708651	111	16	B6xCAST	CGCAGAGTCCTGAAAACGGCAGAATCCTCCAGCGTATCCAAACTCAACGGGCATTAGAAGCTTGCTTGGAAGTCTCTTGTTTTTTGTGTTTTTTTTTTTTTTTCTGTCACTCAGAGTCACGTGGAATGCCATCCCTACTTCACATCTCAGGTGGATTTGTTATAAGCAAGGAAGTGGAGGAGGTTAATAACTAGCCAGGGCATTGGAGATCCAGAATAAGGCTCTGGGCAGGGACTGGAGTCTCCTTATTCCCAGGCACTCACCTGAACATCTTAGGACCCACCTGGAAACCAAGAATTTTCTTCCTGACTTTGATATTCAAAAATTAAAGACAACGGCCAATCCATCCTTTCCCTTAGTCATTTGCTTTGCATTTATCATGATTTGGCAGATATCTGA…	CGCAGAGTCCTGAAAACGGCAGAATCCTCCAGCGTATCCAAACTCAACGGGCATTAGAAGCTTGCTTGGAAGTCTCTTGTTTTTTGTGTTTTTTTTTTTTTTTCTGTCACTCAGAGTCACGTGGAATGCCATCCCTACTTCACATCTCAGGTGGATTTGTTATAAGCAAGGAAGTGGAGGAGGTTAATAACTAGCCAGGGCATTGGAGATCCAGAATAAGGCTCTGGGCAGGGACTGGAGTCTCCTTATTCCCAGGCACTCACCTGAACATCTTAGGACCCACCTGGAAACCAAGAATTTTCTTCCTGACTTTGATATTAAAAAATTAAAGACAACGGCCAATCCATCCTTTCCCTTAGTCATTTGCTTTGCATTTATCATGATTTGGCAGATATCTGA…
chr6	118732112	118732113	211	16.5	B6xCAST	TCTCAGCAGAGTATGCATGACCACCTCTTCCACCACCACCTCTCAGTGTTTACCACTCTGATATACTATTTAATCTATTCTTCCCCACCCCAAATTACAATAGAAATTCTACGAAGGCATGGAGTTTTAACTATTTTGTTCATTGTTATTTCAGCAGTGCCAAGAAAGGTTCTTGGGAGAACAGACCTTCCATTTATGGCTGGCTGGATGGCTGGTAAGAATAACTGCAGTCTGGTTATATAGAATTAACTGTTTATATAGAGTTTACTTAATTTTCTCTATTCTTTTAAGGGAAGATCTTCCAACTAAATGCTTTCTCCCTGACATCTTCCAACCTCTTCTTCTTCTCCCTCTCAGTGGCTTTGTGTCTCCTCTTAGGAAAGCTGACTGATGGATCCA…	TCTCAGCAGAGCATGCATGACCACCTCTTCCACCACCACCTCTCAGTGTTTACCACTCTGATATACTATTTAATCTATTCTTCCCCACCCCAAATTACAATAGAAATTCTACAAAGGCATGGAGTTTTAACTATTTTGTTCATTGTTATTTCAGCAGTGCCAAGAAAGGTTCTTGGGAGAACAGACCTTCCATTTATGGCTGGCTGGATGGCTGATAAGAATAACTGCAGTCTGGTTATATAGAATTAACTGTTTATACAGAGTTTACTTAATTTTCTCTATTCTTTTAAGGGAAGATCTTCCAACTAAATGCTTTCTCCCTGACATCTTCCAACCTCTTCTTCTTCTCCCTCTCAGTGGCTTTGTGTCTCCTCTTAGGAAAGCTGACTGATGGATCCA…
chr6	121345444	121345445	81	15	B6xCAST	CATGCATTCTTCATCTACTCCTTTTCCCACCAGATCATCCCCTCTCCCTCTGTTCATCTTGCAATGGCTGCGAGTGGTGGGGGGAGTGGAAGGTTTGTCTTCTGCAGGTTCCCTCAGGCTTCCTCGTGGGTGGGGCTTGCCGAGCCCGCTATCCCATGGCTTAGCAAGCAAAGGCGACCTATATGGTCTTTTTCACATCTCTTCACCTTTATCCTCCCCTTCTGCCGCTACCCAATGGAGACAGGGTCATTCTCTCTAGGAGATTTAAAGCTCACTGAGGAGGTATCATTTGCCTAAGTCACAAAGCAAGAGCCCTTCCTACTAGCTGCTCTTTGGGCTCAGCCTTTGAAGAGCCACTGAACTGAGCACTGAGCATGCGCTGTGGGTCAGGTGTTGCTC…	CATCTACTCCTTTTCCCACCAGATCATCCCCTCTCCCTCTGTTCATCTTGCAATGGCTGCGAGTGGTGGGGGGAGTGGAAGGTTTGTCTTCTGCAGGTTCCCTCAGGCTTCCTCGTGGGTGGGGCTTGCCGAGCCCGCTATCCCATAGCTTAGCAAGCAAAGGCGACCTATATGGTCTTTTTCACATCTCTTCGCCTTTATCCTCCCCTTCTGCCGCTACCCAATGGAGACAGGGTCATTCTCTCTAGGATATTTAAAGCTCACGGAGGAGGTATCATTTGCCTAAGTCACAAAGCAAGAGCCCTTCCTACTAGCTGCTCTTTGGGCTCAGCCTTTGAAGAGCCACTGAACTGAGCACTGAGCATGCGCTGTGGGTCAGGTGTTGCTCCCCATCCCTGA…
chr7	3498532	3498533	111	15.5	B6xCAST	AGAATGGAGGACACCTGAGAAATAACACCAGTGTTGTTGACTTCTGGCTTCTACATGCATACTCACACATATGCGCATGGACAGACACACAGAAGATATAAAAGGGGGAGGGAAGACAGGGTATGGGGGAAGGATGGAGGAATGTGTCTGAAGAACAACTTACCATTTTCAGGAATGTCTGTTTGCCCAACACACAGCCCTGGGGGAGGGAGAAATCACTCATGAGGCACAGGTCCCTGCCTGAAGTTACCTAGTCACCCTCCCTGGTCCTGAGAGGCATGCAGAGAACACTCTCATGTGATCACTTCAGGATATCCTCTCAGGAGCTGCAGGCTCCCTACTTTGGGCTGTGGCTTCGGCTTGTTTCTGGGATGGGCTGTTATCCTCTTGTTGATCTTA…	AGAATGGAGGACACCTGAGAAATAACACCAGTGTTGTTGACTTCTGGCTTCTACATGCATACTCACACATATGCGCATGGACAGACACACAGAAGATATAAAAGGGGGAGGGAAGACAGGGTATGGGGGAAGGATGGAGGAATGTGTCTGAAGAACAACTTACCATTTTCAGGAATGTCTGTTTGCCCAACACACAGCCCTGGGGGAGGGAGAAATCACTCATGAGGCACAGGTCCCTGCCTGAAGTTACCTAGTCACCCTCCCTTGTCCTGAGAGGCATGCAGAGAACACTCTCGTGTGATCACTTCAGGATATCCTCTCAGGAGCTGCAGGCTCCCTACTTTGGGCTGTGGCTTTGGCTTGTTTCTGGGATGGGCTGTTATCCTCTTGTTGATCGTA…
chr7	4099067	4099068	700.5	39	B6xCAST	AGAGCCATTAACTCTTTTCACTGGAATGGAAGCTGATGTGTTTGTGCAGCCAAGCCACAAATGCACTAGGAGGGAGTTAAGTTTAAACTCACACTCAGGTCCCACAGATAGACCTAGTCTTCCACCCCACCCCACCCCACCCTTCTCTTCCTCCTCCTCCTGGTCCTCTGTTTCTCCTTTTCCTTTTCCTTCTTTTTCTCCTTCCTCTTCCTTCCTCCTTCTCTTCATTTGGAAGTCCCATACCCCTAGGAAACACCCCAGAAGTCATAATAACGGTAACATCAGCTGAAGAAATGTGACCACTGTGGAGGTTTCATAAGAATAACCCCCTCAGAATCATGTATTTGAATGCTTGACCATAGGGAAAGGCACTATTAGGAGGGGTAGTCTTGTTGGAGT…	AGTGTCTGTGGAAGAGCCATTAACTCTTTTCACTGGAATGGAAACTGATGTGTTTGTGCAGCCAAGCCACAAATGCACTAGGAGGGAGTTAAGTTTAAACTCACACTCAGGTCCCACAGATAGACCTAGTCTTCCACCCCCCCACCCCACCCTTCTCTTCCTCCTCCTCCTGGTCCTCTGTTTCTCCTTTTCCTTTTCCTTCTTTTTCTCCTTCCTCCTTCTCTTCATTTGGAAGTCCCATACCCCTAGGAAACACCCCAGAAGTCATAATAATGGTAACATCAGCTGAAGAAATGTGACCACTGTGGAGGTTTGATAAGAATAACCCCCTTAGACTCATGTATTTGAATGCTTGACCATAGGGAAAGGCACTATTAGGAGGGGTAGTCTTGTTGGAGT…
chr7	4526471	4526472	311.5	17	B6xCAST	TTGCTGAGCTATATTATCGACCTTCCATGTCTTTCTAGAAGCCTTCCTTTTTTTTAATCCTTTGGCTGAACTGAATTGCTGCAAATCTGGGGAGGTGGGCCCACGAGGCAGAGACCCATTTTACAGACAGGAAAGAAAGTGAATGGTCCCTTGAATGAAGGCACCTAGGGAGAGGTGAGTTAAGGACTGGAATAGAAAGAAGGACAGCCAGAATCCATGTAGGGAAAGGGTGTAGGGAGGAATGTAAAGGTTCCCAGTTAGAACTCCAGAGAGGGCTGAGAATCCTACTGGTGGGGTTCAGGGTTTGGGAAAGGGAGGACAAGAGAGAAAAAGAGAACGAATATCAACGAGAGAGCAACTGTCCAGGTATTCCAAACCAGCTCCGTCAAAGCTTGGGGA…	TTGCTGAGCTATATTATCGACCTTCCATGTCTTTCTAGAAGCCTTCCTTTTTTTTAATCCTTTGGCTGAACTGGATTGCTGCAAATCTGGGGAGGTGGGCCCACGAGGCAGAGACCCATTTTACAGACAGGAAAGAAAGTGAATGGTCCCTTGAATGAAGGCACCTAGGGAGAGGTGAGTTAAGGACTGGAATAGAAAGAAGGACAGCCAGAATCCATGTAGGGAAAGGGTGTAGGGAGGAATGTAAAGGTTCCCAGTTAGAACTCTAGAGAGGGCTGAGAATCCTACTGGTGGGGGTCAGGGTTTGGGAAAGGGAGGACAAGAGAGAAAAAGAGAACGAACATCAACGAGAGAGCAACTGTCCAGGTATTCCAAACCAGCTCCGTCAAAGCTTGGGGA…
chr7	16706599	16706600	147	22	B6xCAST	GGTAACTCAAACTCCACCTCTCTCTATTCGACCCCGGTAATTGACTGTCATCATTGTTATTTAACCAATGGTTTTAAATTAGGAAGCAAGGTTTAGACAACAAAGGCTGGTATATGTGAGGATCTACTTGTCTTGGAGCAACTAGACCTTGGGGGTACAGAATTTGGCACTTGATACAAGCAGCACCAGACTAACCCCCTACTCTATCCCCTTACCCACCCAGCTAGGCTGAGGGACGAACACAGTGAGGAACATAGCTCAGGATATCTCATAGCTCAGCATAGTGCCTCGCTAAGGACTCAGGACACATCTTCCCACTAAAGACAAAGAAAGGGCTGAATGCTGGTAGAGCTTTCTCCCTTCTGTCCTCGAGTCACTTTTAACCAGCTGCCAGCCTCC…	GGTAACTCAAACTCCACCTCTCTCTATTCGACCCCGGTAATTGGCTGTCATCATTGTTATTTAACCAATGGTTTTAAATTAGGAAGCAAGGTTTAGACAACAAAGGCTGGTATATGTGAGGATCTACTTGTCTTGGAGCAACTAGATCTTGGGGGTACAGAATTTGGCACTTGATACAAGCAGCACCAGACCAACCCCCTACTCTATCCCCTTACCCACCCAGCTAGGCTGAGGGACGAACACAGTGAGGAACATAGCTCAGGATATCTCATAGCTCAGCATAGTGCCTCGCTAAGGACTCAGGACACATCTTCCCACTAAAGACAAAGAAAGGGCTGAATGCTGGTAGAGCTTTCTCCCTTCTGTCCTCGAGTCACTTTTAACCAGCTGCCAGCCTCC…
chr7	27198575	27198576	416.5	11	B6xCAST	CTGAGCTACATAGTGAGACCCTGACTAGGAAGGAAGGAAGGAAGGAAGGAAGGAAGGAAGGAAGGAAGGAAGGAAGGAAGGAAAGAGGCTCTTACGCTCTCTAACCACATTTGTAAGGTACACACACCAAGTACTCCAGCCACCATCATCAAAATTAAATGCAGAAAACCTGTCACACCACAAAAGTAGTTTGTGTTAGACACTACTCTGAAGGAGTTGTTCACTTTGCTTTATTTTTTGGTCTGTTTTTGTTTTGTTTTGTTTGTTTGTTTGTTTGTTTGTTTGAGAAAGGACCCATGTAGCCCAGGCTGACCTCAAACTTGCTATGTAGCTGAGAATACCTTGTTCTTTCTTCCTCCACATCAGATTATAGGTATACACTGCCAGCACTAGAAATGG…	ACATAGTGAGACCCTGACTAGGAAGGAAGGAAGGAAGGAAGGAAGGAAGGAAGGAAGGAAGGAAGGAAGGAAGGAGGCTCTTACACTCTCCAACCACATTTGTAAGGTACACACACCAAGTACTCCAGCCACCATCATGAAAATTAAATGCAGAAAACCTGTCACACCACAAAAGTAGTTTGTGTTAGACACTACTCTAAAGGAGTTGTTCACTTTGCTTTATTTCTTCGTCTGTTTTTGTTTGTTTGTTTGTTTGTTTGTTTGTTTGAGAAAGGACCCATGTAGCCCAGGCTGACCTCAAACTTGCTATGTAGCTGAGAATACCTTGTTCTTTGCTCCTCCACATCAGATTATAGGTATATACTGCCAGCACTAGAATTGGGGGCAATTTTGAAGGGG…
chr7	27933657	27933658	163.5	1	B6xCAST	TGTCACTGAGGGCAGAATGAACACAGTGATCACCGCTCCACAGACAGACAAAGTGAGGGGAGCAAAACCTGTCACCCAGAGCTCCTCCTTCCCTCAGTCATGAGTCTGGGAGACCCGAGGTCTGGCCTCCTAGAACAAGTGTGAGTTGAGTGGCAGGCAGACTTGTGGTGGAACATGTGTGCAATCCCAGTGCTGGGGAGGGCAATCCAATTGGATCAGTAGTTCAAAGGCATCCTTGGCTACAGAATACATCAGAAAACTGCCTGCATTTTCAGAGTCTTACCAGAAAGGAAGAAAGAAAGGAAAAAGGGGAGGGAGGTGGGAGGGGGAGAAGGAAGGAGGAAGGAGGGATGGAAAGAGGGATACAGATACACAGACAGACAGACAGACAGACAGACA…	GTTGTGTCTGTAGCCCTTGTCACTGAGGGCAGAATGAACACAGTGATCACCGCTCCACAGACAGACAAAGTGAGGGGAGCAAAACCTGTCACCCAGGGCTCCTCCTTTCCTCAGTCATGAGTCTGGGAGACCCGAGGTCTGGCCTCCTAGAACAAGTGTGAGTTGAGTGGTATTCAGACTTGTGATGGAACATGTGTGCAATCCCAGTGCTGGGGAGGGCAATCCAATTGGATCAGTAGTTCAAAGGCATCCTTGGCTACAGAATACATCAGAAAACTGCCTGCATTCTCAGAGTCTTACCAGAAAGGAAGAAAGAAAGGGAAAAGGGGAGGGAGGTGGGAGGGGGAGAAGGAAGGAAGGATGGAAAGAGGGATACAGATAGACAGACAGACAGACAGA…
chr7	35817898	35817899	175.5	33	B6xCAST	CCTGTGACCAAGCCTTTACTATGTAGGCCTTTGGAGGACAGGATTTCCAAATTAAAGCATTAGCCTGTCAGTCTTTTCCTTTTTGGAGGAGCCTGAGAATCTCCAAGTGACATCCTTCAAGGTCCAGCCTGATGTTTCTGGTGCTGGCCAGCCTCATCTCCATCATGTCTGTCCATCCTCATAGAAGTGTGTTTTGGCTTTCCAGATGTTTCACTCCCTTGTCCCCCAGTGTGCTTCGCTCAGTCTTTGGGTCTTAACCGAACAACTATTTTTTCAGGGGGGCCTTCCTTGTCCTTTCTGACTAGGTTCAATCCCATAACCCACTCTTCAGGTCTTAGGCCTCATAGCTATAGCTTCTGTGTGTCTTACTCAATCAGTGTCAACCCCTTTCCATACACT…	CCTGTGACCAAGCCTTTACTATGTAGGCCTTTGGAGGACAGGATTTCCAAATTAAAGCAGTAGCCCGTCAGTCTTTTCCTTTTTGGAGGAGCCTGAGAATCTCCAAGTGACATCCTTCAAGGTCCAGCCTGATGTTTCTGGTGCTGGCCAGCCTCATCTCCATCATGTCTGTTCATCCTCATAGAAGTGTGTTTTGGCTTTCCAGATGTTTCACTCCCTTGTCCCCCAGTGTGCTTCGCTCAGTCTTTGGGTCTTAACCGAACAACTATTTTTTCAGGGGAGCCTTCCTTGTCCTTTCTGACTAGGTTCAATCCTGTAACCCACTCTTCGGGTCTTAGGCCTCATAGCTATAGCTTCTGTGTGTCTTACTAGATCAGTGTCAACCCCTTTCCATACACT…
chr7	47031582	47031583	661	35	B6xCAST	AAACTTCCTGTCAAAAATGACATTTAAAATTTAGCCGTAATTAGGCCCAGGCAGCCTCGCTGACAGTTGGCACCTCAGCGATCTCCTTATTTTATTTTATTTTTTAAAAAACTGTGCTGTTTACTAGTTTGTGTTACCTTGTAGTTGCTGGGGGTGGGGGTGGGAGGGCTGGGCTTGCCCCTTCCATACATCTGAGGTGCTCTCGCTTTTACAGCAAGGGTATGTCAGCTGTAGAAACATGGCCTAGTTTCTGGGAAAGAGAAAAAGGCAGTTAGACCAGAGGGTCTCAACCTGCAGGCCGAGACCCACTGGGAATCGACCAGTGCTTTTACAGAGGTCGCCTAAAACCACCGGATACCACAGATATTTACATTATGATACATAACCATAGCAAAACCA…	AACTTCCTGTCAAAAATGACATTTAAAATTTAGCCGTAATTAGGCCCAGGCAGCCTCGCTGACAGTTGGCACCTCAGCGATCTCCTTATTTTATTTTATTTTTAAAAAACTGTGCTGTTTACTAGTTTGTGTTACCTTGTAGTTGCTGGGGGTGGGGGTGGGAGGGCTGGGCTTGCCCCTTCCATACATCTGAGGTGCTCTCGCTTTTACAGCAAGGGTATGTCAGCTGTAGGAAACATGGCCTAGTTTCTGGGAAAGAGAAAAAGGCAGTTAGACCAGAGGGTCTCAACCTGCAGGCCGAGACCCACTGGGAATCGACCAGTGCTTTCACAGAGGTCGCCTAAAACCATCGGACACCACAGATATTTACATTATGATGCATAACCATAGCAAAACCAC…
chr7	48899710	48899711	93	12.5	B6xCAST	GTGTGGGTAAGATGGCTTGGCAGACAGAACTCAGAACAAGGAGTCAGGAGTTCTCATTCTGTTTCCTGTTGGCTGATAATGGGCTCTTGGGACCTCTTCTTCACCTGTTAAAAATAGAAGCAACTGCGACACCCTCCTCTGCACTCTCACATCTCTTACTCGCCTTCCCAGTATCTTGCAGCATCCCTATGGGCTGTTGTTACTAAGCACCAGCAAGATTTGCACCCAAGAAATACTAAGGCTCTTCTTATATATGCAGCAATAGCTTCAAGGACAAAACCCAGGTTGAAGTCGGTTGGAATAGCCAGGCAGTGCAGAGCAAAACTCAGCAATTTGGAAGCCGAGGCCAGTTTCCTGAGGTCCTGTGGCTACTCAGAGGATGATCTTTTGGTCGAATCA…	GTGTGGGTAAGATGGCTTGGCAGACAGAACTCAGAACAAGGAGTCAGGAGTTCTCATTCTGTTTCCTGTTGGCTGATAATGGGCTCTTGGGACCTCTTCTTCACCTGTTAAAAATAGAAGCAACTGTGACACCCTCCTCTGCACTCTCACATCTCTTACTCGCCTTCCCAGTATCTTGCAGCATCCCTATGGGCTGTTGTTACTAAGCACCAGCAAGATTTGCACCCAAGAAATACTAAGGCTCTTCTTATATATGCAGCAATAGCTTCAAGGACAAAACCCAGGTTGAAGTCGGTTGGAATAGCCAGGCAGTGCAGAGCAAAACTCAGCAATTTGGAAGCCGAGGCCAGTTTCCTGAGGTCCTGTGGCTACTCAGAGGATGATCTTTTGGTCAAATCA…
chr7	58405643	58405644	181.5	18	B6xCAST	CCATGTCATAAATGAGGTCATGGAAAGCAAGCTGGTCAAAGAGATTTTTATGAAGCCACAAGCAAAGACATGCTTTATTTCCCAACACACAGGCCATAAGGCCAGCAGGCACACCCAGCACCCAAAAGCACACAGGAGGGCAAAGGCATATAGGCTGATGGACACATAGGTCTTTGGAAGCAGGCACACAGACCTAGAAATAGACACAGGCTAAGTTACAAGCACCTAATCTCGACACTGTATTTATACAGAATCATACAAAAGAGACTTATGCCAAAAAGATAGTCATATATTAGATTACACTATTGTTTACTTTGGGGTTCCATGAATGTTCAGTGTCAGCCATTTTGTGTTTATTCATAGCCCCCTGTATTAGTCAGGGTTCCCTAGAGTCATGGA…	AATGAGGTCATGGAAAGCAAGCTGGTCAAAGAGATTTTTATGAAGCCACAAGCAAAGACATGCTTTATTTCCCAACACACAGGCCATAAGGCCAGCAGGCACACCCAGCACCCAAAAGCACACAGGAGGGCAAAGGCATATAGGCTGATGGACACATAGGTCTTTGGAAGCAGGCACACAGACCTAGAAATAGACACAGGCTGGTGAAGGCAAAGTCACAAGCACCTGATCTCGACATTGTATTTATACAGAATCATACAAAAGAGACTTATGCCAAAAAGGTAGTCATATATTAGATTACACTATTGTTTACTTTGGGGTTCCCTGAATGTTCAGTGTCAGCCATTTTGTGTTTATTCATAGCCCCCTGTATTAGTCAGGGTTATCTAGAATCATAGA…
chr7	87345801	87345802	205.5	11.5	B6xCAST	AGGCTCTACCTTGTAGTTTTCAGGTTGTACTTATTTAAAGGGAATGACTTTACAAGGAAGGAAGGGAAACAATTTTGAGAATCCTAACCTTTTTAGGAAAATGATAAAACTCTTTGGGGAATGGACTTATACCATAATTTCTGTGGTTCTTTGATAGTGGTTATATCCTGCCATATGGTTGATTAATTCAGTTATCCTCAGTTTCATTTGTGTCCATCAGACTCTGCAGTAGTTACCAACTGAGCTTGCCAGGATCCATCAAGAAAAAAAGTATCACTGTGTATGGCAGCTTTAGCCTTTTAAGATGTGTTAGTTAAACAAGAGGACTTTATACAGAATTGAAATTGTGCCAGTTGGTTTTCCATCTCTGCCTCAGTTCTTAGACTATTGGATACATTG…	AGGCTCTACCTTGTAGTTTTCAGGTTGTACTTATTTAAAGGGAATGACTTTACAAGGAAGGAAGGGAAACAATTTTGAGAATCCTAACCTTTTTAGGAAAATGATAAAACTCTTTGGGGAATGGACTTATACCATAATTTCTGTGGTTCTTTGATAGTGGTTATATCCTGCCATATGGTTGATTAATTCAGTTATCCTCAGTTTCATTTGTGTCCATCAGACTCTGCAGTAGTTACCAACTGAGCTTGCCAGGATCCATCAAGAAAAAAAGAATCACTGTGTATGGCAGCTTTAGCCTTTTAAGATGTGTTAGTTAAACAAGAGGACTTTATACAGAATTGAAATTGTGCCAGTTGGTTTTCCATCTCTGCCTCAGTTCTTAGACTATTGGATACATTG…
chr7	89916808	89916809	282	36.5	B6xCAST	GCCACCCAACATGGGTGCTGGGAGTGAACTTGGGTCCTCTGCAAGAACAGTCCGAGCTTTCAGTCACTTAGCTATCCCTCCAATCCACTATCATCATTCCCCTTCGCACTCCCTTAGACATCTTGGACTGTTCTAAATTAAGTACATAGACTAAAAAATCAAAAATAAATGATTTTAATGTTCCCATTATTTTATGTAACATTAGAAATTCCTTATCTCTTCGAGATGGGGGAGGGGGAAGGACTTATAGGCTGGGAAGCAGTTAGAGAGCAAACCAGGAAGGGGATAAGGTCTGGACTGTAAAAAAGGATTAAAGAATATAAATAAATAAATAAATAAATAAGAAATTACTTATCTCAAAACCAGGCTTATACATGCATCCTATGCAAAAATCCATCT…	ACATGGGTGCTGGGAGTGAACTTGGGTCCTCTGCAAGAACAGTCCGAGCTTTCAGTCACTTAGCTATCCCTCCAATCCACTACCATCATTCCCCTTCGCACTCCCTTAGACATCTTGGACTGTTCTAAATTAAGTACATAGACTAAAAAAAAAAAAATCAAAAATAAATGATTTTAATGTTCTCATTATTTTATGTAACATTAGAAATTCCTTATCTCTTCGAGATGGGGGAGGGGGAAGGACTTATAGGCTGGGAAGCAGTCAGAGAGCAAACCAGGAAGGGGATAAGGTCTGGACTGTAAAAAAGGATTAAAGAATATAAATAAATAAATAAATAAATAAGAAATTACTTATCTCAAAACCAGGCTTATACATGCATCCTATGCAAAAATCCATCTT…
chr7	92186694	92186695	234.5	42.5	B6xCAST	GACATTTTGTTTTTGTGGGTTCTTGGGATCACAGGATCACATTCAGGTTGTCAGGCTTGCATGATTAGTACTTTTATCCACTTTTGTCATGTCTTTTAAAGTCTTTCTTTCCTCCTCTTCCTTGTCTTTCTCTTCCTCCTCCTCTTCCCTTAAAACAAACACAGTCTTTCACCTCTGAGTTCTTAGAAAACTCTGCAGACTTGATTGAAACATCTGGCTTCTGCTCTTGTGCTTCCCCTGGCTGGTTGGCACAGAAAGCGCATGGGCTATTTTTGCCTCTCACCACCTTTGGCATTACCCATGCATGCCTCTGGCATTACCCATGCATGGTTGTTCTCCTTGAAGAGGCACGGCCACGCAGCCATTAGTCTCTCAAGGTCCTAGAATTCTTTCAGGGAA…	GACATTTTGTTTTTGTGGGTTCTTGGGATCATGGGATCACATTCAGGTTGTCAGGCTTGCATGATTAGTACTTTTATCCACGTTTGTCATGTCTTTTAAAGTCTTTCTTTCCTCCTCTTCCTTGTCTTTCTCTTCCTCCTCCTCTTCCCTTAAAACAAACACGGTCTTTCACCTCTGAGTTCTTAGAAAACTCTGCAGACTTGATTGAAACATCTGGCTTCTGCTCTTGTGCTTCCCCTGGCTGGTTCGCACAGAAAGCGCATGGGCTATTTTTGCCTCTCACCACCTTTGGCATTACCCATGCATGCCTCTGGCATTACCCATGCATGGTTGTTCTCCTTGAAGAGGCATGGCCACGCAGCCATTAGTCTCTCAAGGTCCTAGAATTCTTTCAGGGAA…
chr7	92454366	92454367	132	4	B6xCAST	AAAAAGTTATCAAATAACAAAGACAGTAAGTGAGGCAGAGAGAAATTAGACTATATACAAGATTAACAAACTGTTAAGAGGCAGTACATACCTCCCAACAGAAGCCTTGGAATGTAAATGGATCAAATTCATCAATCAAAAAATAGATTTGCTAAATGGATTTCTTTGGATATATGATACCTATAAGAACTTACTTCACTAGTAAAAAAAATATATATATATATATATATATATATATATATATATACATATATATATATAAACTTAAAGGGTCAGAAAATATAGAAGACATAAATTGAAACCCAAAGTCGAAAGGAATGTGTAAGTTCCTATCAAATAAAGTATACTATAAATCAAAGGTATAAGAAAATAGAGGTCATTTCATACTGAGTAAAAAAA…	AAAGTTATCAAATAACAAAGACAGTAAGTGAGGCAGAGAGAAATTAGACTATATACAAGATTAACAAACTGTTAAGAGGCAGTACATACCTCCCAACAGAAGCCTTGGAATGTAAATGGATCAAATTCATCAATCAAAAAATAGATTTGCTAAATGGATTTCTTTGGATATATGATACCTATAAGAACTTACTTCACTAGTAAATATATATATATATATATATATATATATATATATATACATATATATATATAAACTTAAAGGGTCAGAAAATATAGAAGACATAAATTGAAACCCAAAGTCGAAAGGAATGTGTAAGTTCCTATCAAATAAAGTATACTATAAATCAAAGGTATAAGAAAATAGAGGTCATTTCATACTGAGTAAAAAAAAATAAAT…
chr7	92456145	92456146	191	14	B6xCAST	TCTATTTACTCAAAATATGTTTTTAAATGTTAACAAACTCAGATAAATTGAATTATGTACCTTTTCTCATCATAATGTGATAAATCAGAAAAAAAGGAAAATATGGGGGAAATATTTGTATATTATTCAAGGAACCAATATATCCAAATTATATAAGGAACTCAAAAAAGTCAGCAATTAAAAAATACAAATAACGCAGCTATGAAATAGGCTTAAGATCTGAATAGCTACCTTTCAAAACAAGATATAAAAATGGTTTAACAAAGTATGTAGGGAAAAGCTCAATTCATAAATGATCAAAAGAATTCAAATCACAACCAGAATGAGTCTCAGGTCAGACACTTTAGAAGCTAAGTCTGTGGTTTTGTCAGTAGAAATAGGGTAACAAAAAACAGACTT…	GTCTATTTACTCAAAATATGTTTTTAAATGTTAACAAACTCAGATAAATTGAATTATGTACCTTTTCTCATCATAATGTGATAAATCAGAAAAAAGGAAAATATGGGGGAAATATTTGTATATTATTCAAGGAACCAATATATCCAAATTATATAAGGAACTCAAAAAAGTCAGCAATTAAAAAATACAAATAACGCAGCTATGAAATAGGCTTAAGATCTGAATAGCTACCTTTCAAAACAAGATATAAAAATGGTTTAACAAAGTATGTAGGGAAAAGCTCAATTCATAAATGATCAAAAGAATTCAAATCACAACCAGAATGAGTCTCAGGTCAGACACTTTAGAAGCTAAGTCTGTGGTTTTGTCAGTAGAAATAGGGTAACAAAAAACAGACTT…
chr7	98105235	98105236	361	45	B6xCAST	CCACCAGGTTCCAAAGACCACGAGTGTTCTCTTCACGACACATATCGGAGAAGTGGGACCTGGCTACACAGTGGCAGTCAGACTCAATGTTAAATGACAGGCCAGGTTAAGAAGTGCAGCCGAACAGCTCCACCTCCTATGTGGGAGGATGTCCTGCTGAGGGTAGCGGCTCTCTGGTCAAGGTCCACAGCCCACAGCAGAGGCCAAAGTGTAACAAGCCTAGTATGGGAGCATTGGTTCTGAAGGACAGAGTGACAGAGACAGCGAAAAAGACAGGAAGTGTCTGAAGACTGACAGAGACAAAAAGGGCAGAGACACAGAAGAAAGACAGAGAAAAGGAGGTAGGGAGAGAGGGCAAGACAGCAAGGTACATAGAAATGCCACAGACAGTTCTGAGGA…	GAGCCACAGGTTCCAAAGACCACGAGTGTTCTCTTCACGACACATAACGGAGAAGTGGGACCTGGCTTCACAGTGGCAGTCAGACTCAATGTAAAATGACAGGCCAGGTTAAGAAGTGCAGCCGAACAGCTCCGCCTCCTATGTGGGAGGATGTCCTGCTGAGGGCAGCGGCTCTCTGGTCAAGGTCCACAGCCCACAGCAGAGGCCAAAGTGTAACAAGCCTAGTATAGGAGCATTGGTTCTGAAGGACAGTGACAGAGACAGAGAAAAAGACAGGAAGTGTCTGAAGACTGACAGAGACAAAAAGGGCAGAGACACAGAAGAAAGACAGAGAAAAGGAGGTAGGGAGAGAGGGCAAGACAGCAAGGTACATAGAAATGCCACAGACAGTTCTGAGGA…
chr7	99291100	99291101	578	85	B6xCAST	AAAAGGGACAAGATTACAGTAAATAAGTGGAGAAAGAAGCCTGAGTTAGATGGTAGAGGGAAGGCGGAGGGACAGGCCAGATCTAGTGACAAGCTGCTCCAAACGTTAGGCATCAAACCTTGGACCTCGAACCTTAACTCTGTCAGTATACAGGCAGTTCCTCTGGTCTGCTCTCAGGAACCTAGCAACTGACTGCATCATCATCTGCCCTCGCTAGGTGTGCCAGGTGTGTGTGCTGTGGGTAAGAGGACCCGCCAGACACCCCTCTCCTCCCTGTCCCCTTCCCTTTTCTTCCCCCTCCCCCCTCCCTCTCCCTGTGGCTCTCTCCTGCAGTCCTCTTCTCTGGGACCTTCCCTGTCTGCGCAGCGACCACATGCTCTGGAAACAAGTTGAGTCCAA…	AAAAGGGACAAGATTACGGTAAATAAGTGGAGAAAGAAGCCTGAGTTAGATGGTAGAGGGAAGGCGGAGGGACAGGCCAGATCTAGTGACAAGCTGCTCCAAACGTTAGGCATCAAACCTTGGACCTCGAACCTTAACTCTGTCAGTATACAGGCAGTTCCTCTGGTCTGCTCTCAGGAACCTAGCAACTGACTGCATCATCATCTGCCCTCGCTAGGTGTGCCAGGTGTGTGTGCTGTGGGTAAGAGGACCCGCCAGACACCCCTCTCCTCCCTGTCCCCTTCCCTTTTCTTCCCCCTCCCCCCTCCCTCTCCCTGTGGCTCTCCCCTGCAGTCTTCTTCTCTGGGAACGCACCTGTCTGCGCAGCGACCACATGCTCTGGAAACAAGTTGAGTCCAA…
chr7	101057609	101057610	159	24	B6xCAST	TGAGTGATTTTTATCTAAAATATGTAAGAACTATTAGAATCGGCTGGGCGTGGTGGCACACTCCTTTAATCCCAGTACCTGGGAGGCAGAGGCAGGTGGATTTCTGAATTCGAGGCCAGCCTGGTCTACAGAGTGAGTGAGTTCCAGGACAGCCAGGGCTACACAGAGAAACCCTGTCTCGAAAAAAAAAACCCAACAAACCAACAACAAAATAATAATAAAATAAAATAAAAAATAAAGAACTATTAGAACCAATAACGAACAGCAAGTCAGGTTTAAATGGGCAAAACATCTGATGAGCATTTCCAAAGGTCATGGGCAATAAACACATGAAAAGATGCTTGATTCTTGCTAACTAACCATCTGGGAAATGCAATTAAAACCACAGTGGAAATCCCC…	TGAGTGATTTTTATCTAAAATATGTAAGAACTATTAGAATCAGCTGGGCGTGGTGGCACACTCCTTTAATCCCAGTACCTGGGAGGCAGAGGCAGGTGGATTTCTGAGTTCGAGGCCAGCCTGGTCTACAGAGTGAGTGAGTTCCAGGACAGCCAAGGCTACACAGAGAAACCCTGTCTCGAAAAAAAAAACCCAACAAACCAACAACAAAATAATAATAAAATAAAATAAAAAATAAAGAACTATTAGAACCAATAACGAACAGCAAGTCAGGTTTAAATGGGCAAAACATCTGATGAGCATTTCCAAAGGTCATGGGCAATAAACACATGAAAAGATGCTTGATTCTTGCTAACTAACCATCTGGGAAATGAAATTAAAACCACAGTGGAAATCCCC…
chr7	109456767	109456768	93	5	B6xCAST	TTGGAAAGGGACAGTCACATATATTCCCACTGTCCGAGTCAGCAGGCTTAACTGAGCTTTAAACACCAAACACACACACATACACACACACACACATACACACACACATGTGCACACACACACACACACACACACACACACATACACACACACATATGTACACACACACACACACACATACACACACATGTGCACACACACACACACACACATGTGCACACACACACACATACACACACACACACACACGTGCACACACACACACACACACACACACACACACACACACACACACACGGAGGCAGAGCCTTTGGAAGGTGACTTAACCAGGGCTCTGGCCTTGCACGGGGATTAATCCACTTCTGGACTGGTGGGAGCTGGGGAAAGTTTTAAGAGGTG…	AAAACTGTTTGGAAAGGGACAGTCACATATATTCCCACTGTCCGAGTCAGCAGGCTTAGCTGAGCTTTAAACACCAAACACACACACATACACACACACACACATACACACACACATGTGCACACACACACACACACACACACACACACATACACACACACATATGTACACACACATGTGCACACACACATACACACACATGTGCACACACACACACACACACATGTGCACACACACACACATACACACACACACACACACGTGCACACACACACACACACACACACACACACACACAGAGGCAGAGCCTTTGGAAGGTGACTTAACCAGGGCTCTGGCCTTGCACGGGGATTAATCCACTTCTGGACTGGTGGGAGCTGGGGAAAGTTTTAAGAGGTG…
chr7	111696480	111696481	210.5	36.5	B6xCAST	TTATGGAAAAATATTCTCAAGTAAAACTTCCTCTTCCCATATATACTTAGGTATTTGTGTCGACTTGACTCCTCTTTTTTGAGACAGGCTCCTCTGTAGCTCAGGCTGCCCTCAAATTCCCTAAGTCAACAATGATGTTGATCCTCCTTCCTCTGGCTCCCAGTGGCTATCATGGGATCCGATGCCCTTTCCTGGCACACAAGTGTGTATGCAGATAGAGTACTTATATACATAAAATTACAAAAATTAAAAGGAGTGAGATTCTGTATTTTTTCTTAAAAGAAGCCAGCTAGAACCTTTCACAACTCCTTGCCTTTAGACATAATAATTGAAACCAAGAAACCCCTCCTACCAATCCCAACATGCCACTCAACTCCAGCTAGAATGAATGATGAATCA…	TCTTATGAAAAAATATTCTCAAGTAAAACTTCCTCTTCCCATATATACTTAGGTATTTGTGTCGACTTGACTCCTCTTTTTTGAGACAGGCTCCTATGTAGCTCAGGCTGCCCTCAAATTCCCTAAGTCAACAATGATGTTGATCCTCCTTCCTCTGGCTCCCAGTGGCTATCATGGGATCCGATGCCCTTTCCTGGCACACAAGTGTGCATGCAGGTAGAGCACTTATATACATAAAATTACAAAAATTAAAAGGAGTGAGATTCTGTATTTTTTTCTTAAAAGAAGCCAGCTAGAACCTTTCACAACTCCTTGCCTTTAGACATAATAATTGAAACTAAGAAACCCCTCCCACCAATCCCAACATGCCACTCAACTCCAGCTAGAATGAATGATGAA…
chr7	112010586	112010587	266.5	45.5	B6xCAST	GGCAAAGGCTAGCTGCCTGGAGAACTGAAGACTGGAGCCAAGATTTAAGGATGAAGGAGGTGGGTATCCTCGAGGAAGCTGAGCAGCAGGGAGGGAACAGTCGTGCACAGACCCGTTGGCCATGCCGGAGGCTTTGGTCTCTACCAGGAATTTCTTCTTTCTTTCTTTCTTTCTTTCTTTCTTTCTTTCTTTCTTTCTTTCTCTCTCTCTCTCTCTCTCTCTCTCTCTCTCCCTCCTTCCCTCCCTCCCTCCCTTCCTTCCTTCCTTTCTTTCTTTCTTTCCTTTTTTAAAAATATTTATTTATTTATTATATACACAGTGTTCTGCATATATATCTGCATGTCAGAAGGGGCGTCAGATCTCATTATAGACCGTTGTGAACCACCATGTAGTTGCTGG…	AAAGGCTAGCTGCCTGGAGAACTGAAGACTGGAGCCAAGATTTAAGGATGAAGGAGGTGGGTATCCTCGAGGAAGCTGAGCAGCAGGGAGGGAACAGTCGTGCACAGACCCGTTGGCCATGCCGGAGGCTTTGGTCTCTACCAGGAATTTCTTTCTTCTTTCTTTCTTTCTTTCTTTCTTTCTTTCTTTCTTTCTTTCTTTCTCTCTCTCTCTCTCTCTCTCTCTCTCTCTCCCTCCTTCCCTCCCTCCCTCCCTTCCTTCCTTCCTTTCTTTCTTTCTTTCCTTTTTTAAAAATATTTATTTATTTATTATATACACAGTGTTCTGCATATATATCTGCATGTCAGAAGGGGCGTCAGATCTCATTATAGACCGTTGTGAACCACCATGTAGTTGCTG…
chr7	112012255	112012256	309	52.5	B6xCAST	AGCAAATTCAAGGTCAGCCTGAGCAATTTTAGACAGATCTTGCCTCAACATGAAAATAAATAACAGAGCTCGAGCTATAATTCGTAGTAGTACAGTACACACAGCACTAGTTTTACCTCACAGTCAACAGTGTGTACACACATTCACACACACACACACACACACACACACACACACACAGAGAGAGAGAGAGAGAGAGAGAGAGAGAGAGAGAGAGAGAGAGAGAGAGAGCATGATAAACTCCTGTTAAATGCTGGTGCCTGAGACTGAGCTGCTCTCAGCCTGGCTTGTTTGCTTGTGAAGTGAAGAGGTTAGAGCTTGTGTTTATATTATGTAAGCTGCATGGCTGGCACCTGAAGATATAAATGCTACTTTGTTCTTCCTCAGTTCAAAGACAAG…	AGCAAATTCAAGGTCAGCCTGAGCAATTTTAGACAGATCTTGCCTCAACATGAAAATAAATAACAGAGCTCGAGCTATAATTCATAGTAGTACAGTACACACGGCACTAGTTTTACCTCACAGTCAACAGTGTGTACACACATTCACACACACACACACACACACACACACACACACACAGAGAGAGAGAGAGAGAGAGAGAGAGAGAGAGAGAGAGAGAGAGAGAGAGAGCATGATAAACTCCTGTTAAATGCTGGTGCCTGAGACTGAGCTGCTCTCAGCCTGGCTTGTTTGCTTGTGAAGTGAAGAGGTTAGAGCTTGTGTTTATATTATGTAAGCTGCATGGCTGGCACCTGAAGATATAAATGCTACTTTGTTCTTCCTCAGTTCAAAGAAAAG…
chr7	114837502	114837503	116.5	14.5	B6xCAST	GACTGGAGCAGATAACTGGAATAGAATATATTGAGATGGGTCTAGATGGAGATGTCTAATTTAGGGCAGGAAGGGAGGTCCCAGAAATACAGCTAATGCAGTGACGAATGTTGTATGGTGTGAAGTAATGGATGACATGTGTAGCATCAGGTTGTGTGTGAACACATGCAAAGTAAATGTGTGTGTGTGTGTGTGTGTGTGTGTGTGTGTGAGAGAGAGAGAGAGAGAGAGAGGGAGAGAGAGAGAGAGAGAGAGAGAGAGTGTGTGTGTATACAGTTGAAAAGTACTATAAGCTGGAGCTGGGAAGTTTCAGTTGGTAAAATGCTCTTTACCCAAGTATGAGAACCTGATTCAAATCTCTAGAACCCATAAAAGAGCTGAGCATAGAAACAAATACCT…	CAGGTAACTGGAATAGAATATATTGAGATGGGTCTAGATGGAGATGTCTAATTTAGGGCAGGAAGGGAGGTCCCAGAAATACAGATAATGCAGTGACGAATGTTGTATGGTGTGAAGTAATGGATGACATGTGTAGCATCAGGTTGTGTGTGGACACATGCAAGGTAACTGTGTGTGTGTCTGTGTATGTGTGTGTGTGTGTGTGTGTGTGAGAGAGAGAGAGAGAGAGAGAGGGAGAGAGAGAGAGAGAGAGAGAGAGAGTGTGTGTGTATACAGTTGAAAAGTACTATAAGCTGGAGCTGGGAAGTTTCAGTTGGTAAAATGCTCTTTACCCAAGTATGAGAACCTGATTCAAATCTCTAGAACCCATAAAAGAGCTGAGCATAGAAACAAATACCT…
chr7	126097739	126097740	119.5	15	B6xCAST	TGGGCACCAACACGCAGCGCTAGCAACAGCCACAGTGTGTGTGTGTGTGTGTGTGTGTGTGTCAGCCAGTTGTGGGCACCAACAGGCAGCGCTAGCAACAGCCACATGCTCTTGTCCTGTTTCCTGTAGAGCACGGCATGATGGGAGGATGGGCGGCACTGCTCCTGACCTCCCCATATGGTGTCTCTGGGATGCTAGAGGTCAAACGCAGGGCAGCACATCCTCCATCACTGATCTACACCCGCAACTCCGTGTCTCTGAATGCTTAAGAACTAAGGGTGATTCCTGTTCACACCTTGGTGCAGTCACTCAGTACTGCTCAATAGTGCTCCCTTGCCAGGTCTCCTGGATCTGGGCCACTAAGGCCATCAGTTCCCATATCCACTCATCCCACAGCCA…	TGGGCACCAACACGCAGCGCTAGCAACAGCCACAGTGTGTGTGTGTGTGTGTGTGTGTGTGTCAGCCAGTTGTGGGCACCAACAGGCAGCGCTAGCAACAGCCACATGCTCTTGTCCTGTTTCCTGTAGAGCACGGCATGATGGGAGGATGGGCGGCACTGCTCCTGACCCCCCCATATGGTGTCTCTGGGATGCTGGAGGTCAAATGCAGGGCAGCACATCCTCCATCACTGATCTACACCCGCAACTCCGTGTCTCTGAATGCTTAAGAACTAAGGGTGATTCCTGTTCACACCTTGGTGCAGTCACTCAGTACTGCTCAATGGTGCTCCCTTGCCAGGCCTCCTGGACCTGGGCCACTAAGGCCATCAGTTCCCATATCCACTCATCCCACAGCCA…
chr7	130309387	130309388	213	19	B6xCAST	GGTGTTTTCAATTGCCTGCCAGAGCTGCCTGTGTGCACAGACCCCCAACATGGCAGCAGAGCTGCTTCCCTGGAGTCAGGATAAGAATGCGACCAATACAATGGCCTGGGGACCTGGACTTGCCTTGAGTGATCGCGATGGCAGAGAAGGGACTCATCATTGTAGACATTACTTTTCTGTTGTTGTGATGAAACAGGAAGGAAGAGTTTGATTTGCCTTACAATTCCAAAGAGGTAAGAAGAATTCATCAGAGAAAAGTCGCATAGCTACAAATGACAGGCATGGCAGCAGCAGGCAGCTGAGAGCTTACATACATCTGCCAACATCTTCCTAAAACTCCGCAAACAGCACCACTAACTGGGAGCCAAGTGTTCAAATACCCAGGCTAATGTTGGTTAT…	GGTGTTTTCAATTGCCTGCCAGAGCTGCCTGTGTGCACAGACCCCCAACATGGCAGCAGAGCTGCCTCCCTGGAGTCAGGATAAGAATGCGACCAATACAATGGCCTGGGGACCTGGACTTGCCTTGAGTGATCGCGATGGCAGAGAAGGGACTCATCATTGTAGACATTACTTTTCTGTTGTTGTGATGAAACAGGAAGGAAGAGTTTGATTTGCCTTACAATTCCAAAGAGGTAAGAAGAATCCATCAGAGAAAAGTCGCATAGCCACAAATGACAGGCATGGCAGCAGCAGGCAGCTGAGAGCTCACATACATCTGCCAACATCTTCCTAAAACTCCGCAAACAGCACCACTAACTGGGAGTCAAGTGTTCAAATACCCAGGCTAATGTTGGTTAT…
chr7	143062943	143062944	422.5	76	B6xCAST	ACTGTTCCTGGTTTTCATTTCTTTCTTTCTTTTTTTTTTTTTTTTCTAGCTGGCTGGAGGCGTGATCCTAGGTGTAGCTCTGTGGTTGCGTCATGATCCACAGACCACCAGCCTGCTGTACCTGGAACTGGGAAACAAACCGGCACCCAACACCTTCTACGTGGGTGAGTACCAAGGAGACGGGTTCCAGTCACAGTGCAGAACAGTCAGGGAGGGCTTCCAAGAAGAGGCTGATGGTCCAAATCTGGTGGGTGAGGCGTTAGAGCTGGGAGTGGCCTAGGCCTAGTATGAGCTGGGTAGGGAGGCTGCCTATAAGAGGAGAATGAGTTGGCTGTGGTGCTGCTGGTGACCCCACAGATCTGAGACTAGACTAGGCAGAAAGGAAGCAACGGGGTGGGG…	ACTGTTCCTGGTTTTCATTTCTTTCTTTCTTTTTTTTTTTTTTTTCTAGCTGGCTGGAGGCGTGATCCTAGGTGTAGCTCTGTGGTTGCGTCATGATCCACAGACCACCAGCCTGCTGTACCTGGAACTGGGAAACAAACCGGCACCCAACACCTTCTACGTGGGTGAGTACCAAGGAGACGGGTTCCAGTCACAGTGCAGAACAGTCAGGGAGGGCTTCCAAGAAGAGGCTGATGGTCCAAATCTGGTGGGTGAGGCGTTAGAGCTGGGAGTGGCCTAGGCCTAGTATGAGCTGGGTAGGGAGGCTGCCTATAAGAGGAGAATGAGTTGGCTGTGGTGCTGCTGGTGACTCCACAGATCTGAGACTAGACTAGGCAGAAAGGAAGCAACGGGGTGGGG…
chr8	14459992	14459993	238	6.5	B6xCAST	TCCCAAAGCCCGTGCTGACAGAAGGCCACGGGTCTCCTTCCCAGGCCTTAACATCAGGATGCTTGCAGGGCTCCAGAGTCCAGTGTTCTGCCCTGTTAGACAAAAGGTCTCCCTCCATCTCTTTAGAGCAATCACCATAAACAAGAATACCATTAGGGAAGTCCTCTTTTGGTACAGCTGGATTTCCCTAGCAATGTACAGCTTCCTGCCTTGGTCTAAGTGGGGACCATGGTTTGATTGTACTCTGTGCCAGGCTGGAAGGTCTTAGCCTGGATCTCTAACCAATATCCTACAAGGGGCTTGATGGTACATCTGGGGGTGCCTTCTACATGTCACTGTGACCCCACAGATGATACTTGAGCATTTCAGGTCACCTATTTGAAAGACTAGATGTGGGAA…	TCCCAAAGTCCGTGCTGATAGAAGGCCACGGGTCTCCTTCCCAGGCCTTAACATCAGGATGCTTGCAGGGCTCCAGAGTCCAGTGTTCTGCCCTGTTAGACAAAAGGTCTCCCTCCATCTCTTTAGAGCAATCACCATAAACAAGAATACCATTAGGGAAGTCCTCTTTTGGTACAGCTGGATTTCCCTAGCAATGTACAGCTTCCTGCCTTGGTCTAAGTGGGGACCATGGTTTGATTGTACTCTGTGCCAGGCTGGAAGGTCTTAGCCTGGATCTCTAACCAATATCCTACAAGGGGCTTGATGGTACATCTGGGGGTGCCTTCTACATGTCACTGTGACCCCACAGATGATACTTGAGCATTTCAGGTCACCTATTTGAAAGACTAGATGTGGGAA…
chr8	14970380	14970381	218.5	36	B6xCAST	CCAGATGGGAACCCTGGATTTTGCTCTCAGCAAGCAGCCAGGTATCAGACGCTTTAACCCAGGGAAGGGGACCTTTGAGGAGGCGAGGACAGGGACACAGCCTGGAGCTGGTTGCTCTATCAGAGGACAGCAATTCCTCCCAGTTCCTGATGGCTCTTGGGAGATGGAGAAACTCAGAGGGAGTGCTGTGAAGAAATGTTTGCCCTGAGATAAGCTTGGTGGCTGCTGCAGGAGGCAGCACCTGGGAGCCTGTTCCTACTGGCACTGACTGTTTTCCTCCACGCCAGCTCCTGCATTCCCAGATTTACAACCCACCCCTGGTAGAAGAGCTTCAGCCTGGGTATGGGAAACTCTCTGCCCCTGACACCCCTCAGCCAGCGTCTGGGACAGTCAGTGGTT…	CCAGATGGGAACCCTGGATTTTGCTCTCAGCAAGCAGCCAGGTATCAGACACTTTAACCCAGGGAAGGGGACCTTTGAGGAGGCGAGGACAGGGACACAGCCTGGAGCTGGTTGCTCTATCAGAGGACAGCAATTCCTCCCAGTTCCTGATGGCTCTTGGGAGATGGAGAAACTCAGAGGGAGTGCTGCAAAGAAATGTTTGCCCTGAGATAAGCTTGGTGGCTGCTGCAGGAGGCAGCACCTGGGAGCCTGTTCCTACTGGCACTGACTGTTTTCCTCCACGCCAGCTCCTGCATTCCCAGATTTACAACCCACCCCTGGTAGAAGAGCTTCAGCCTGGGTATGGGAAATTTTCTGCCCCTGACACCCCTCAGCCAGTGTCTGGGACAGTCAGTGGTT…
chr8	24670523	24670524	121.5	23	B6xCAST	CACTAATTGAGAAAATGCCTTACAGTTGGATCTCATGGAGGCATTTCCTCAAGGGAGGCTAGCTCCTTTATCTGTGATAACAAGAGCTTATATCAAGTTGACACACACAACCACCCAGTACAAAGAACTAAACTCAGTGCTCAACATGGCAAATTCACAGAGGCCAAGGCCAGTTGGAAGGTTAATGCTGTCACTCAGGCCCTCCCTGGTGGAGTCTTGAATGAAGATGGAACCCGTGGTGGAGGCACATTGTCATATGCTTTAAGGGTAGACACATGGGACTGAATCACCCACTGGTCCCAGGGGAAGGCAGGAGGGAGAGAGATGCCAAGGTTGATCACAGGGAGATTTTTTTCTCCTTTCCTTTCCTTTCCTTTCCTTTCCTTTCCTCCCCCCTCT…	CACTAATTGAGAAAATGCCTTACAGTTGGATCTCATGGAGGCATTTCCTCAAGGGAGGCTAGCTCCTTTATCTGTGATAACAAGAGCTTATATCAAGTTGACACACACAACCACCCAGTACAAAGAACTAAACTCAGTGCTCAACATGGCAAATTCACAGAGGCCAAGGCCAGTTGGAAGGTTAATGCTGTCACTCAGGCCCTCCCCGGTGGAGTCTTGAATGAAGATGGAACCCGTGGTGGAGGCACATTGTCATATGCTTTAAGGGTAGACACATGGAACTGAATCACCCACTGGTCCCAGGGGAAGGCAGGAGGGAGAGAGATGCCAAGGTTGATCACAGGGAGATTTTTTTCTCCTTTCCTTTCCTTTCCTTTCCTTTCCTTTCCTCCCCCCTCT…
chr8	25715485	25715486	468.5	15.5	B6xCAST	ACAAACTCCTTGACAGCATTTACCTCTGTGGTCTTAAACTGGGTGGGCTTCATGGTGCGCCAACTCTACGTAGAAATATCTTAGAGGGACAAGGAGTGAGTGCATTCTACTCATTGTGATTTTCTGAAACATTTGAGGGATGTGAATACATAGGGGAATGCTCATTCCTGCTGTCCTGACCACTGGCAAGAGGCTAAAGAAAGATAAGGCACAGACCAAACATTGGATCATATATGCACCATTTTCTGACCAATTTAATGTAGACTCCAGTCTAACCTGGAATTTAAGGGCATTTTATTTTCTGTCTTTCCCTCTGCCAATCATGTTTCCTTTGCCAGCTGGGTCACTCAGTCATGTTTCCTGGTAAAGCTATATAACTGAATCTGAATTATATGAAAT…	ACAAACTCCTTGACAGCATTTACCTCTGTGGTCTTAAACTGGGTGGGCTTCATGGTGCGCCAACTCTACATAGAAATATCTTAGAGGGACAAGGAGTGAGTGCATTCTTCTCATTGTGATTTTCTGAAACATTTGAGGGATGTGAATACATAGGGGAATGCTCATTCCTGCTGTCCTGACCACTGGCAAGGGGCTAAAGAAAGATAAGGCACAAACCAAACATTGGATCATATATGCACCATTTTCTGACCAATTTAATGTAGACTCCAGTCTAACCTGGAATTTAAGGGCATTTTATTTTCTGTCTTTCCCTCTGCCAATCATGTTTCCTTTGCCAGCTGGGTCACTCAGTCATGTTTCCTGGTAAAGCTATGTAACTGAATCTGAATTATATGAAAT…
chr8	27144915	27144916	258	13	B6xCAST	AGCGCACACTCTCTGCGTACACAGTGGCCTTTCCCAGAGACTGACTGTTCTCATTTCTGATAGGGGCATGTACCCACAACAGTGGCTTTTAACTGGTATTTATCATCTGGGACAAGGGGGCTCTAACTGTGAGCACAGAGTTCTGAGCCAGAAGGAAATGAGAGATAAAAGTCAATGAGAAGTAGCAAGTCACACCAAGGTCTCAGGGGGGAGTGGGAGGAAAGACCTGGCAGCCGAGCTGCAGCTGAGCAGATTTATAAGGCCCAGGAAACAAGACTCCAGGGCAACTCAAGGTGATTTTTACTCAAAGAACTCCAAGGCAGTAAACAGTTTTAGCCCCAGGGGCAAGCCACCTTCACCACCTATCAGGGAGACCAATAAATTAAGAGCCTATCAGCT…	GAGCGCACACTCTCTGAGTACACGGTGGCCTTTCCCAGAGACTGACTGTTCTCATTTCTGATAGGGGCATGTACCCACAACAGTGGCTTTTAACTGGTATTTATCATCTGGGACAAGGGGGCTCTAACTGTGAGCACAGAGTTCTGAGCCAGAAGGAAATGAGAGATAAAAGTCAATGAGAAGTAGCAAGTCACACCAAGGTCTCAGGGGGGAGTGGGAGGAAAGACCTGGCAGCCGAGCTGCAGCTGAGCAGATTTATAAGGCCCAGGAAACAAGACTCCAGGGCAACTCAAGGTGATTTTTACTCAAAGAACTCCAAGGCAGTAAACAGTTTTATCCCCAGGGGCAAGCCATCTTCACCACCTATCAGGGAGACCAATAAATTAAGAGCCTATCAGC…
chr8	29602947	29602948	496	19	B6xCAST	TCCACAATGAAAGGAGTAACTGTCTTTATGTTGGAGCGATATGCATGAGTGTCGGCTCTTCTTTCAGTCCTGTGACCTCAGGCAGGTCAGTGAAATCTGAGAATCAGTTTCCTTCCTGATATAATACTGACTAGCTTAAATTATATGGCTGTCAGGATTTCTCACAATAGCCAGTAATACTATATATTCTATAAACTATGTACATGTGTATACATGTGACTTTGAAACTTTAGTGTAGATTGCAGTCTAAAAAAACAATTCAAATAGATATGCATGATTGTTTCCAAATCATAAACTGACTTTTGTTTTTTAGGGCATTACAATTTCTGCTAGGTCATAGAATGACCAAAGAACATGAAATAGTGGCTTGAACCAGGGAGCCAGCTAAAACCCTGTATC…	TCCACAATGAAAGGAGTAACTATCTTTATGTTGGAGTGAGATGCATGAGTGTCGGCTCTTCTTTCAGTCCTGTGACCTCAGGCAGGTCAGTGAAATCTGAGAATCAGTTTCCTTCCTGATATAATACTGACTAGCTTAAATTATATGGCTGTCAGGATTTCTCACAATAGCCAGTAATACTATATATTCTATAAACTATGTACATGTATATACATGTGACTTTGAAACTTTAGTGTAGATTGCAGTCTAAAAAAACAATTCAAATAGATATGCATGATTGTTTCCAAATCATAAACTGACTTTTGTTTTTTAGGGCATTACAATTTCTGCTAGGTCATAGAATGACCAAAGAACATGAAATAGTGGCTTGAACCAGGGAGCCAGCTAAAACCCTGTATC…
chr8	33591637	33591638	246	32	B6xCAST	GCACATCTTGCAAACCCATGCTTTGCCCCCATACCTATCTCTCTTGAACCCAGTCAAACTTCTGCATGAAGGAAAATGCCACACAAACTTAGTTCAGAAACAATAGTAACTCAATATCTGGGCCCAACAACTAAAACCTTATCTTGTAAGCCCTATTTAATCTGATTCCTCTGGTGGCCAATCCTAATCTAGATCCACCATGATACAGGGAAACTCTAGCTACATTTTGTCCTCGCGCTATCCCAGTCCAAAAAGAACCTAACTCTCTTCTGCTTCCTCTCTTCCTCCTTCCCACCCAGAAGTCCTGCCTACTCGCCCAGTGATTGGTTCCTTTATTCATTTGGAGATTGGTTCACAAGAAGCCACCTGAGTATGTGACTCATTCGTCATTCCAGACAA…	GCACATCTTGCAAACCCATGCTTTGCCCCCGTACCTATCTCTCTTGAACCCAGTCAAACTTCTGCACGAAGGAAAATGCCACACAAACTTAGTTCAGAAACAATAGTAACTCAATATCTGGGCCCAACAACTAAAGCCTTATCTTGTAAGCCCTATTTAATCTTATTCCTCTGGTGGCGAATCCTAATCTAGATCCACCATGATACTGGGAAACTCTAGCTACATCTTGTCCTCACGCTATCCCAGTCCAAAAAGAACCTAACTCTCTTCTGCTTCCTCTCTTCCTCCTTCCCACCCAGAAGTCCTGCCTACTCGCCCAGTGATTGGCTCCTTTATTCATTTGGAGATTGGTTCACAAGAAGCCACCTGAGTATGTGACTCATTCGTCATTCCAGACAA…
chr8	35598042	35598043	481.5	71	B6xCAST	AGACAAACTCTCACAGAAATAGATGGAGAGGTGACAGATGGTCAGGATACCTCGTTGAATATGTAGGAGCTGGCTGCCTAAAGCCTTCTGCTACCTGACCTTATGTTTAGTCCCCTAGAGCACTGGTGACTCTTCCTCCCAAAGCAGAGTTCTCTTAGCTCTTCCTCCCCTGATTGGCTCATACTTTCCCCTTAACTTTGATGTCCATTGTGTGTGTAGGGGGGGGGGGCGGAGGGGGGAGGTTCAGTGATGGAGGAACATGAAGCTATGATTGGTGGAAGTGGAATGGATCCAGGAAGGCAGATTTTTTTTCTCCCCAGTGGCTTTACCCTCTTCCAGGCAATGTTGCTTCCCAGAATTCCACCCTGGGTTCAGCCTATGGATTGGAGATCAAGGGAA…	CAGACAAACTCTCACAGAAATAGATGGAGAGGTGACAGATGGTCAGGATACCTGGTAGAGTATGTAGGAGCTGGCTGCCTAAAGCCTTCTGCTACCTGACCTTACCTTTAGTCCCCTAGAGCACTGGTGACTCTTCCTCCCAAAGCAGAGTTCTCTTAGCTCTTCCTCCCCTGATTGGCTCATACTTTCCCCTTAACTTTGACGTCCATTGTGTGTGTAGGGGGGGGGGGGAGGGGGGAGGTTCAGTGATGGAGGAACATGAAGCCATGATTGGTGGAAGTGGAATGGATCCAGGAAGGCAGATTTTTTTTCTCCCCAGTGGCTTTACCCTCTTCCAGGCAATGTTGCTTCCCAGAATTCCACCCTGGGTTCAGCCTATGGATTGGAGATCAAGGGAAA…
chr8	37252396	37252397	170.5	29	B6xCAST	AATTTGTGCCTATGGAGTTTATCTGATGTAGAGAGATAGTATCATTATTTGTTACACCGGGCACTGAACTATTAACTAGAAGAGGTTATTAGCTATCAAAGACAAGCAAAGCGATGAATGCTACACAATAACAATACAGTGAAAGCTAAAAATACACTTATGGCAATATTTTACCAAGATAAAGGACTGTTAACAGCTCTAAGGGAAAAGATTCTGACAGCTCAAAACCCTATTTCACTTTCTATTATGCCAGCGGACATTTCTATCACTCAATTTGTAAGTACTCTTTTATTTCTCTAAGAATGTGCGTAGCATTTTTGAAGTACTCTTCCATGTAGAAATGACTCTATATTAAAATATTCACTGTGTCGCCATTAGAATCCTTGGATACACTTTATA…	GAATTTGTGCCTACGGAGTTTATCTGATGTAGAGAGATAGTATCATTATTTGTTACACCGGGCACTGAACTATTAACTAGAAGAGGTTATTAGCTATCAAAGACAAGCAAAGCGATGAATGCTACACAATAACAATACAGTGAAAGCTAAAAATACACTTATGGCAATATTTTACGAAGATAAAGGACTGTTAACAGCTCTAAGGGAAAAGATTCTGACAGCTCAAAACCCTATTTCACTTTCTATTATGCCAGCGGACATTTCTATCACTCAATTTGTAAGTACTCTTTTATTTCTCTAAGAATGTGCGTAGCATTTTGAAGTACTCTTCCACGTAGAAATGACTCTATATTAAAATATTCACTGTGTCGCCATTAGAATCCTTGGATACACTTTACA…
chr8	46083360	46083361	209	26	B6xCAST	AATGATTTAACAAACTGGATCCCCCAAGCTGCTTAAAAACAAACAAACAAACAAACACAAAACAAAAAGAAAACCAAAAACCCTAAACTATCGTTTATGTGTTTATTGTAGGGAGCTCTATACAAAAAAGAACAGAAATAATCAAAAGTGCTGTCAACAAAAATTTCTTTTTCCTATGCTGCAGACACACACAAATGAACACAGTATGGTTGGTCTCTGCTTCAGGACACTCTGGGGATACACCTGACTCAAGGAAAAGCATTCAGCCAGCAGTATTTATAATTGAAAAATGCACGCAAATAAATGTCTATAAGACCTTACTTAATTCTTAAAATGCAGGTGATACGTGTATTTACAACTGCAGACTTCATACTGTGTGAATGAATCTGATTGCTACAA…	ACATAAGAAAATGATTTAACAAACTGGATCCCCCAAGCTGCTTAAAAAAACAAACAAACAAACACAAAACAAAAAGAAAACCAAAAACCCTAAACTATTGTTTATGTGTTTATTGTAGGGAGCTCTATACAAAAAAGAACAGAAATAATCAAAAGTGCTGTCAACAAAATTTTTTTTTCCTATGCTGCAGACACACACAAATGAACACAGTATGGTTGGTCTCTGCTTCAGGACACTCTGGGGATATACCTGACTCAAGGAAAAGCATTCAGCCAGCAGTATTTATAATTGAAAAATGCACGCAAATAAATGTCTATAAGACCTTAATTCTTAAAATGCAGGTGATACGTGTATTTACAACTGCAGACTTCATACTGTGTGAATGAATCTGATTGCCAC…
chr8	62286270	62286271	321	60.5	B6xCAST	TTCCAACAGGAAGGTAGTGGTTTAATACAAAGGCTGGCTAGTAGGTTATAAATGGCCAAGTCATAGATTTAGGTTTATATATGAAAAAATGAATAGAAACAAAATATAGGCATCAGGTATAGTGTCACTCCCAGAATGTGTATGTACAGGAAGTGGCCATCCCAGGAGAGCACCCGTGTTAAACTGAGTCAGGTGACTCCTCACAGCTCCCACTCCCCAGGCAGACCTTTATAAAGAACAGTGAATTTTGTATCTGAACCATGTTGGCTATTTGGATGTTTCTCCACCCACATCCAACTATGATCCCTGGTCCTTCTTATGAGAGACTTTTATATTAGTAGCCGAAGAGTAAACACAGGAGAGTAGCTCCACTTCTACATGATGGTGCCTTGATTCCTT…	TTCCAACAGGAAGGTAGTGGTTTAATACAAAGGCTGGCTAGTAGGTTATAAATGGCCAAGTCATAGATTTAGGTTTATATATGAAAAAATGAATAGAAACAAAATATAGGCATCAGGCATAGTGTCACTCCCAGAATGTGTATGTACAGGAAGTGGCCATCCCAGGAGAGCACCCGTGTTAAATTGAGTCAGGTGACTCCTCACAGCTCCCACTCCCCAGGCAGACCTTTATAAAGAACAGTGAATTTTGTATCTGAACCATGTTGGCTATTTGGATGTTTCTCCACCCACATCCAACTATGATCCCTGGTCCTTCTTATGAGAGACTTTTATATTAGTAGCCGAAGAGTAAACACAGGAGAGTAGCTGGACTTCTACATGATGGTGCCTTGACTCCTT…
chr8	67532355	67532356	151	17.5	B6xCAST	TAATGGATGACTATGAGCATCCACATCTGTATTTGTCAGGCACTGGCAGAGCCTCACAGGAGACAGCTATGTCAGGTTCAACCAAGGGCATTTTAATGATAGTGTTCACTATCATATATCCCCAGTAGAGTCTGTCTTGGAAGGACACAATTAATCAAGAGAGGAGAAGTGGAAGTGGATAGCAAGCTCTGCCCATCTTATATTAGTTAATAAGAAACGTAGTGGTCTAACATATGTCTCTAGTGGAATTATTTATTATAAGGTGTAAAGGTGTTCCTGGGAAAAATTAAGTTGTAAGAAATGTTAGTAGTGCGGGTGTCCACTATTTTTCAATGACACAGAAATCAACTGCTTCAGTTTCATTGCGATTAAAGGATTGCTCTTCAACACTAATTACAC…	CTAATGGATGACTGTGAGCATCCACATCTGTATTTGTCAGGCACTGGCAGAGCCTCACAGGAGACAGCTATGTCAGGTTCAACCAAGGGCATTTTAATGATAGTGTTCACTATCATATTTCCCCAGTAGAGTCTGTCTTGGAAGGACACAATTAATCAAGAGAGGAGAAGTGGAAGTGGATAGCAAGCTCTGCCCATCTTATATTAGTTAATAAGAAACCTAGTGGTCTAACATATGTCTCTAGTGGAATTATTTATTATAAGGTGTAAAGGTGTTCCTGGGAAAAATTAAGTTGTAAGAAATGTTAGTAGTGCGGGTGTCCACTATTTTTCAATGACACAGAAATCAACTGCTTCGGTTTCCTTGCGATTAAAGGATTGCTCTTCAACACTAATTACA…
chr8	77684461	77684462	142	23	B6xCAST	GCCTTAGTGTCTGTGGTGGTTTGGGTGAGAGTGAGCCCATCCGTTCATGTTTGCACATGCTCACTCCCCAGGAGAACTGTTTGGGAAGGATTGGGAGGTAAGTCTTTGATGGCAGAGGTGGGTTGCTGGTGGTGGGCTTTGAGTAACTAAGACGTTGCCTTACTCATTTAAAAAAATGTTATGAATGTTTGGTCTGAATTTTAAATATTTACCTCTTAAAATATGCTTGTGATTACATTCAGAATGTTTATTATGTTTGCCTTCTTTTTAAAACTGTATTTACTCACTTTACATCCCAATATCCCCCCTCTCTTCCCAGTGCCCCTCACACAGACCCTCTCCCTTTTCTTCACTCCCCTTCTTTTCAGATCTTCTAAGATGCTAGGAGGCAGTCATGTC…	TGCCTTAGTGTCTGTGGTGGTTTGGGTGAGAGTGAGCCCATCCGTTCATGTTTGCACATGCTCAGTCCCCAGGAGAACTGTTTGGGAAGGATTGGGAGGTAAGTCTTTGATGGCAGAGGTGGGTTGCTGGCGGTGGGCTTTGAGTAACTAAGACGTTGCCTTACTCATTTAAAAAATGTTATGAATGTTTGGTCTGAATTTTAAATATTTACCTCTTAAAATATGCTTGTGATTACATTCAGAATGTTTATTATGTTTGCCTTCTTTTTAAAACTGTATTTACTCACTTTACATCCCAATATCCCCCCTCTCTTCCCAGTGCCCCTCACACAGACCCTCTCCCTTTTCTTCACTCCCCTTCTTTTCAGATCTTCTAAGATGCTAGGAGGCAGTCATGTC…
chr8	79281817	79281818	217.5	41	B6xCAST	AAGCTCTCTGTCCTTTCACTAAACCCGTATAAAGTCTATCCACAAATCTTTGTTCTTTATCAGAAAGTCCTTCTGTGTGGTCCTTCAAGGTTGCCTGGACACATAATGTTCTCCTGAAGCCGTCAGACAGTAGCACCCTCTTAGTACAATGGTGTCCAAAACAGTTTGGCAGAGCACCTGGGGGTCCCGGTGCAGGGTGACTTGAGTGAAGGAGCCATGGGGAAGGCACTCTTGAGAGGCAGGTTAGTAAACGCCGATTAGGAGAAAGTAGCAGCGTGGAAATAGTCATTTTGTCTGTAACCGGATACTTTCTGACTTAGTGTGATTTATGAATGGCCTAGAAGGAAGGAAAATGTATTTTTGAGTTCAACAGAATTAAAATACTTAAGTAGTAAAACC…	AAGCTCTCTGTCCTTTCACTAAACCCGTATAAAGTCTATCCACAAATCTTTGTTCTTTATCAGAAAGTCCTTCTGTGTGGTCCTTCAAGGTTGCCTGGACACATAATGTTCTCCTGAAGCCGTCAGACAGTAGCACCCTCTTAGTACAATGGTGTCCAAAACAGTTTGGCAGAGCACCTGGGGGTCCCGGTGCAGGGTGACTTGAGTGAAGGAGCCATGGGGAAGGCACTCTTGAGAGGCAGGTTAGTAAACGCCAATTAGGAGAAAGTAGCAGCGTGGAAATAGTCATTTTGTCTGTAACCGGATACTTTCTGACTTAGTGTGATTTATGAATGGCCTAGAAGGAAGGAAAATGTATTTTTGAGTTCAACAGAATTAAAATACTTAAGTAGTAAAACC…
chr8	106530028	106530029	883	57.5	B6xCAST	GTGTCCGTCCACAGAGGCCAAAAGAGGGCAACAGGTCCCTTGGAGCTGCCTGACATTAGGTGCTGGCATCTGAACTCCATTCCTGTGACTGATCAGAAAGTGCTCGTGACCATTGAGCCATCTCTCCAGCCCTCAAAGACAGTACTGATATATGGACCAGGGGTGTAGCTCAGTGACAGAATTTTTGCCTAGTATATATGTGAGTTCCTGGTCAATCTCCATTGCCACCGCCCCCCAAAAAAAAGTCAAATGGAAAAGTCCAGATGTGACCAGATTATTAGAGAATCAGGTAACTCTCTACCTTTGAAACGTGTTAACAGTGTGTCTAGGTTCTTTTCATATAGCCTGCAGTGTGAGATCATCCATAGCTGATAGCTTGTTTCTTTTTGAGAGCTGGGG…	GTGGCGGGTTTCCGTCCACAGAGGCCAAAAGAGGGCATCAGGTCCCTTGGAGCCGCCTGACATTAGGTGCTGGCATCTGAACTCCATCCCTGTGACTGATCAGAAAGTGCTCGTGACCATTGAGCCATCTTTCCAGCCCTCAAAGACAGTACTGATATATGGATGTAGCTCAGTGACAGAATTTTTGCCTAGTATATATGTGAGTTCCTGGTCAATCTCCATTGCCACCGCCCCCCAAAAAAAAGTCAAATGGAAAAGTCCAGATGTGACCAGATTATTAGAGAATCAGGTAACTCTCTACCTTTGAAACATGTTAACAGTGTGTCTAGGTTCTTTTCATATAGCCTGCAGTGTGAGATCATCCATAGCTGATAGCTTGTTTCTTTTTGAGAGCTGGGG…
chr8	123692404	123692405	204	13.5	B6xCAST	CAGCCCTCTTGATCTCCTCTCCCAACCCCAAGGATTCCAGGAGCTCTGACAGGCACCGACAAGGCTGGGTGTGAGGGACAGCACAGTTACCACTCAGCTTTACAAAGATGTGGGATGTGGTGATGGGGGCGGGGGTTGCCTGCCTCCTGGGTCTCCTCTGTGCTCTAAGGTCCAGCCTCCCTTGGAGCCAACCTCCTACAGACTGGCCTCTCATCTTGTCCTCCTACCACAAGGAATAAAATCCCTCAGTTTGAGACAACGTGAAAATCATCTTAGAACCGCAGAACCTCATATTTGTCCACGTAAAGCAATTTTGGCTGCTCTGTTTTTCCTGTCTCTGACCTTCTACACAACTAAAATATCAGTCATTTCCCTAGAGGAAAGACAGTTCCTTTCCCC…	CAGCCCTCTTGATCTCCTCCCCCAACCCCAAGGATTCCAGGAGCTCTGACAGGCACCAACAAGGCTGGGTGTGAGGGACAGCACAGCTACCACTCAGCTTTACACAGATGTGGGATGTGGTGATGGGGGCGGGGGTTGCCTGCCTCCTGGGTCTCCTCTGTGCTCTAAGGTCCAGCCTCCCTTGGAGCCAACCTCCTACAGACTGGCCTCTCATCTTGTCCTCCTACCACAAGGAATAAAATCCCTCAGTTTGAGACAAGGTGAAAATCATCTTAGAACCGCAGAACCTCATATTTGTCCACGTAAAGCAATTTTGGCTGCTCTGTTTTTCCTGTCTCTGACCTTCTACACAACTAGAATATCAGTCATTTCCCTAGAGGAAAGACAGTTCCTTTTCCC…
chr8	125660321	125660322	105.5	14.5	B6xCAST	ACTGCTACTGATCCATTGAGTCTTAACAACATTCCATCATGAACAAGGGAGGGGCCAGGAGGCTCCACCCTTCTCTGAGGAGCTCTTGGCAGTTAATGGATGCTGGGGAATGGAAGCCACTTTCTTCCGGGGTGGAACCACTGGTAAATTGCTCTGCTCCAGTAAATGCCACTCACCTATCCTCAAGCCCACAACTCCAATTAAACTCAGTGGGTCTCAAGAAAACAAAACAAACAAACAAACAAAAAACCACAAAGACATGAAAATAGGAGGGGATGGTAGGAGGAGGTAAAAATGAACAGGATATGTTATAAACATGCATCAGATTGTCAAAGAATAATAAATACAATTTTTAAAAAAATGATGGCACAAGAACCCAAGTGTGATCTTGGTCTGGTT…	GAGGTGGTAACTGCTACTGATCCATTGAGTCTTAACAATATTCCATCATGAACAAGGGAGGGGCCAGGAGGCTCCACCCTTCTCTGAGGAGCTCTTGGCAGTTAATGGATGCTGGGGAATGGAAGCCACTTTCTTCCGGGGTGGAACCACTGGTAAATTGCTCTGCTCCAGTAAATGCCACTCACCTATCCTCAAGCCCACAACTCCAATTAAACTCAGTGGGTCCCAAGAAAACAAAACAAAAAAAACCACAAAGACATGAAAATAGGAGGGGATGGTAGGAGGAGGTAAAAATGAACAGGATATGTTATAAACATGCATCAGATTGTCAAAGAATAATAAATACAAATTTTTAAAAAAATGATGGCACAAGAACCCAAGTGTGATCTTGGTCTGGTT…
chr9	16312957	16312958	291	52.5	B6xCAST	TTGAGGAACAGTCTTCCCCTTTGCCCATAAGCCAGCCAGCCACTTAAGACACAACTCTTGGACCTGGATCTGAAGAGCTGGGCCACAAAGCACTCTGAGCTGGCAGTGCAGAAGGCTGTGGTCACAACCCGTTCTTCTATAAAGGTGCTCTGAATACTGAGCCAGGTGAGTGCAGCTGCCTGAGATTTGGTCTGCAGGTGTGGAGAGGGTAAGGCAGACAGCCTTAGACCATATACAGTTCTATATATTCATAGTATCACAGCGTCAGAGTCCTAGCAGGAAGCCACAAATCATGTTTTATTTAGCAAAAACCTTCTGAGTGGGTTGAGATTGTCTCACAGGAAGCCTTGCTAAGCATCTGTGAGGAACTCAGCTCACACTTTAAATGGCAACTTGTAA…	TTGAGGAACAGTCTTCCCCTTTGCCCATAAGCCAGCCAGCCACTTAAGACACAACTCTTGGACCTGGATCTGAAGAGCTGGGTCCCAAAGAACTCTGAGCTGGCAGTGCAGAAGGCTGTGGTCACAACCCGTTCTTCTATAAAGGTGCTCTGAATACTGAGCCAGGTGAGTGCAGCTGCCTGAGAATTGGTCTGCAGGTGTGGAGAGGGTAAGGCAGACAGCCTTAGACCATATACAGTTCTATATATTCATAGTATCACAGTGTCAGAGTCCTAGCAGGAAGCCACAAATCATGTTTTATTTAGCAAAATCCTTCTGAGTGGGTTCAGATTGTCTCCCAGGAAGCCTTGCTAAGCATCTGTGAGGAACTCAGCTCACACTTTAAACGGCAACCTGTAA…
chr9	17482895	17482896	172.5	21	B6xCAST	TGATACTGATGTTGAAGGCATGGAGATCATAGAGAGCAGCTAAAGTTTGGCATTGGGTAGAAGGTAGATCTAGAATCCCTAAAGAGAGGCCAGGAGAGGGTACTGGAGAAACTTCAACCTCAAGTGCAATACCTTCAGTATTGAAAGGTTCATGGAGAGGAGTTGATGCTTGGCATGATGTGGCAGGGTTAGACTACCTGAAGAATGAATACGATGGCCTATGGGTACAGATTTAGCTCAGTTGTAGTGGAGACCAGAAGGTTAAAGATGCCAGTGCTGTGAGACTGTGACCAAGGGCGGCAGCAGTTGTAGAGTGGAGCCATCCTGAGCTAAGCAGAAAAGCTAAATATTTTATATGTGCACAAATTTTGGAGGAGCTCAGAAGATTATGACTGAGTC…	TGATACTGATGTTGAAGGCATGGAGATCATAGAGAGCAGCTGAAGTTTGGCATTGGGTAGAAGGTAGATCTAGAATCCCTAAAGAGAGGCCAGGAGAGGGTACTGGAGAAACTTCAACCTCAAGTGCAATACCTTCAGTATTGAAAGGTTCATGGAGAAGAGTTGATGCTTGGCATGATGTGGCAGGGTTAGACTCCCTGAAGAATGCATACGATGGCCTATGGGTACAGATTTAGCTCATTTGTAGTGGAGACCAGAAGGTTAAAGATGCCAGTGCTGTGAGACTGTGACCAAGGGCGGTAGCAGTTGTAGAGTGGAGCCATCCTGAGCTAAGCAGAAAAGCTAAATATTTTATATGTGCACAAATTTTGGAGAAGCTCAGAAGATTATGACTGAGTC…
chr9	24405437	24405438	131.5	21	B6xCAST	TACATTCAAAACAAACCTCCCCCTTCCTCCCTTGCTCCCACTCCCTCCCTCTCATCTCCCTTCCTTCCATCTTCCTGTCCTTCCATTCTCCTCAGAAAATGGGAAGCCTCCCATGGATATGAACCCACATTGGTTCATCAAGTTGGGGTAGGACTAGGCACATCTTCTCCTATTGTAGTCAGTCAAAGCAGCCCAGTTAGGGGAAAGGGATACAAAGGAAGGAAACAGCCAGAGACAGCCCTTGTTCTTGCTGTTAGGAATCCTATGTGAAGACTGAGCTTCAAAATTGTTAACATATGTGCCAAGGGCCTAGGTCTGTCTCATACATGCTCTCTGTTTGGCAGCTCAGTCTCTGTGGGGCCTTATGGGTCTGGATTAGTTGATCCTATAGGTTTTCTA…	ACATTCAAATCAAACCTCCCTCTTCCTCCCTTGCCCCACTCCCTCCCTCTTATCTCCCTTCCTTCCATCTTCCTGTCCTTCCATTCTCCTCAGAAAACGGGAAGCCTCCCATGGACATGAACCCACACTGGTTCATCAAGTTGGGGTAGGACTAGGCACATCTTCTCCTATTGTAGTCAGTCAAAGCAGCCCAGTTAGGGGAAAGGGATACAAAGGAAGGAAACAGAGCCAGAGACAGCCCTTGTTCTTGCTGTTAGGAATCCTATGTGAAGACTGAGCTTCAAAATTGTTAACATATGTGCCAAGAGCCTAGGTCTGTCTCATACATGCTCTCTGTTTGGCAGCTCAGTCTCTGTGGGGCCTTATGGGTCTGGATTAGTTGATTCTATAGGTTTTCTA…
chr9	27851522	27851523	165	27	B6xCAST	CCTCAGCTCTCTGAGAAGTGCTGTATGACGCCTGGGGAATTGAGCTTGACCTGGACCACGTTAGTAGTGTTGCTACCTCCAAGATGCATGGCCTCTGTATAACATGAGAAGATAATGCTGAGAAGTGTGTGCTTATTGAAAAGGCCACCTCATGCCACTCCGAGTTTGAGTGAACAAAGACTTGGCTCAGCCTCTGGTTTTGCAGAGATATTTGAGGGTTAGTAGAAGAGTTGCATACAGAAAATGAAAGCAACTCTGAGACGCTCATCTCTGCAAGAAACCACTTCTGGAAGCCATGTTTGGACTACTGCTGGAGCCTTCTTAGCCTTCCTTCTTTCTAAGTGTCCCCAATATCTCCTGGCACCAGTCTCCCTCTGTACCCATGTCTACACTCTGATT…	CCTCAGCTCTCTGAGAAGTGCTGTATGACGTCAGGGGAATTGAGCTTGACCTGGACCACGTTAGTAGTGTTGCTACCTCCAAGATGCATGGCCTCTGTATAACATGAGAAGATAATGCTGAGAAGTGTGTGCTTATTGAAAAGGCCACCTCATGCCACTCCGAGTTTGAGTGAACAAAGACTTGGCTCAGCCTCTGGTTTTGCAGAGATATTTGAGGGTTAGTAGAAGAGTTGCATACAGAAAATGAAAGCAACTCTGAGACGCTCATCTCTGCAAGAAACCACTTCTGGAAGCCATGTTTGGACTACTGCTGGAGCCTTCTTAGCCTTCCTTCTTTCTAAGTGTCCCCAATATCTCCTGGCACCAGTCTCCCTCTGTACCCATGTCTACACTCTGATT…
chr9	27965354	27965355	101	16	B6xCAST	GTCCAGAGTTAATGTATGCCCTGTCCCTGCCACACCTGTGACACTGAGAATTTGTAATCACAAACAAAACCTGGACAGATTCCATGCCAGCCGTTACTTTAATTAAAGCTATTTAGAGGGGCTGAAGCTAATTTAAAGGTGAGTGCCAGTGGGTTTCTCAAGTCAAAAAGTGCTAGTTTGACAAGTAATGATAGTGCAGGGCTTAATTGGATCCCGCTAAATGAGGAGAAGCAAGCGAAGAGAGCACAAGCTGATGGGACCCTATGTCTGCTAGCAAAGGAAGACAGAGATGGGGCTAAGCTCTCGTGGGAACGGGTGTTGTGAGGAGTGACTTAATCCATGTCGTCTGTTTGCCTGTGAAATGAATGCTAATTGCGCTCATCTTTAATAGGTTTGGAA…	GTCCAGAGTTAATGTATGCCCTGTCCCTGCCACACCTGTGACACTGAGAATTTGTAATCACAAACAAAACCTGGACAGATTCCATGCCAGCCGTTACTTTAATTAAAGCTATTTAGAGGGGCTGAAGCTAATTTAAAGGTGAGTGCCAGTGGGTTTCTCAAGTCAAAAAGTGCTAGTTTGACAAGTAATGATAGTGCAGGGCTTAATTGGATCCCACTAAATGAGGAGAAGCAAGCGAAGAGAGCACAAGCTGATGGGACCCTATGTCTGCTAGCAAAGGAAGACAGAGATGGGGCTAAGCTCTCGTGGGAACGGGTGTTGTGAGGAGTGACTTAATCCATGTCGTCTGTTTGCCTGTGAAATGAATGCTAATTGCGCTCATCTTTAATAGGTTTAGAA…
chr9	44025721	44025722	202	31.5	B6xCAST	TTAGGTGTGTGGTATCTACAAGTGCCAGTTTGTGACAGTTCACCCAGCTATACAATGCTAACTAAAGCAGAGCCTTCTAAGTATTTTGTACTTAAATAAATGAAAGTTTTGTTTTGTCCTTTTTAAAACAAAAAACAAACAAACAAACAAACAAAAAAAAAAAAAAACAGCCAGACAGTGGTGGCACACACCTTTAATCCCAGCACTTGGGAGGCAGAGGCTGGCAGATTTCTGAGTTCGAGGCCAGCCTGGTCTACATATTGAGTTTCAGGACAGCCAGGGCTACACAGAGAAACCCTGTCTCAAAAAACAAAAACAAAAAAATCAACAAAAAGTCTCTGTTGTATTTAAGATGGCAGAACTACTAAGGATGATGGGAAGGACATAAGTGTACAAGTG…	GTTTAGGTGTGTGATATCTACAAGTGCCAGTTTGTGACAGTTCACCCAGCTATACAATACTAACTAAAGCAGAGCCTTCTATGTATTTTGTACTTAAATAAATGAAAGTTTTGTTTTGTCCTTTTTAAAACAAAAAACAAACAAACAAACAAACAAAAAAAAAAAAAAACAGCCAGACAGTGGTGGCACATGCCTTTAATCCCAGCACTTGGGAGGCAGAGGCAGGCAGATTTCTGAGTTCGAGGCCAGCCTGGTCTACATATTGAGTTCCAGGACAGCCAAGGCTACACAGAGAAACCCTGTCTCAAAAAACAAAAACAAAAAAATCAACAAAACGTCCCTGTTGTATTTAAGATGGCAGAACTAGTAAGGGTGATGGGAAGGACATAAGTGTACAAG…
chr9	44040000	44040001	899.5	12	B6xCAST	AATGCTCTAAACCACTGAACCTTCATCCCTCCAGCACCCCAGACTTCATTTCTTAGTGAAGAAATATACAATAATTTGCATCTATGTTTTAGAATCAACATGGGCTGACCTGGGGTATACCGTTTGTTGTTTGTTTTGAGAAATTCGTTCATTCATTCATTCATTCATTCATTGTTGGTTTTGGGGGATAAGGTCTCATATATGCCAGGCTGGTCTCAAGCTCTCTATGTAGCCAAACATTGCCTTGAACTCCTGACCCTCCTGCCTCTAATTCCTGGGTTCTGGGATTTCAGACATGTAGCACCATACCTGGTTTAGCCCCTAGGATTCATGCATACTGGGTAAACATTCTACCCACTGGGCTACATCCCCAGCCTCCCTTCTATTGTACATTGAATC…	CAATGCTCTAAACCACTGAACCTTCATCCCTCCAGCACCCCAGACTTCATTTCTTAGTGTAGAAATATACAATAATTTGCATCTATGTTTTAGAATCAACATGGGCTGACCTGGGGTATACCGTTTGTTGTTTGTTTTGAGAAATTCGTTCATTCATTCATTCATTCATTCATTGTTGGTTTTGGGGGATAAGGTCTCATATATGCCAGGCTGGTCTCAAGCTCTCTATGTAGCCAAACATTGCCTTGAACTCCTGACCCTCCTGCCTCCAATTCCTGGGTTCTGGGATTTCAGACATGTAGCACCATACCTGGTTTAGCCCCTGGGATTCATGCATACTGGGTAAACATTCTACCCACTGGGCTACATCCCCAGCCTCCCTTCTATTGTATATTGAAT…
chr9	44041195	44041196	658	13.5	B6xCAST	GGGTGACTGCCCTCTGGGTTGTTCTAAAGAAAAGTATTTTTGCTGTTGTTTTAATCTTGAGTTTTCCTACCCATGTGTCCCAAGCTAGAGCTACTGGAGACAAAGGAGAGGGACCCACCTGGGACCAACAAGAGGCCATCTTACCTTGATTCAATTCTTTCCAGCTTTCAGCTTCCGACTTGTCCATTCGGAAATGGGAGACTTTTAGTCTCCTCTGTCTCCATCCATCATCCCTTTCCGAATCCTTGGTTGTCTTCTTTGAGCCTTTGATTCTAACCGACTGGAGAGGTTGCTCAAGCAGATACAAAGTTGCAAGCTCTCAACAGGCCAGGCTCCCCTCCCCTTCCTGAAGGCAGAATGCCTGGGGACCCAGAAAGTAGGCCAGGGCCTGGAAACCTT…	GGGTGACTGCCCTCTGGGTTGTTCTAAAGAAAAGTATTTTTGCTGTTGTTTTAATCTTGAGTTTTCCTACCCATGTGTCCCAAGCTAGAGCTACTGGAGACAAAGGAGAGGGACCCACCTGGGACCAACAAGAGGCCATCTTACCTTGATTCAATTCTTTCCAGCTTTCAGCTTCCGACTTGTCCATTCGGAAATGGGAGACTTTTAGTCTCCTCCGTCTCCATCCATCTTCCCTTTCCGAATCCTGGGTTGTCTTCTTTGAGCCTTTGATTCTAACAGACTGGAGAGGTTGCTCAAGCAGATACAAAGTTGCAAGCTCTCAACAGGCCAGGCTCCCCTCCCCTTCCTGAAGGCAGAATGCCTGGGGACCCAGAAAGTAGGCCAGGGCCTGGAAACCTT…
chr9	44044576	44044577	1374.5	145.5	B6xCAST	AGATTCGGGGCGCCGAAAACACTGCTGCGCCTCTGCCAAATCACGCTACCCCTGTATCTAGTTCTGCCAGGCTTCTCCAGCCCCAGCCCCAATTCTTTTCTCTAGTGTTCCCCCTTCCCTCCCCTGAATCTCAAGCCCACACTCCCTCCTCCATAACCCACTGTTATCAAATCCAAGTCATTTGCCACCCAACAACCATCAGGAGGCGGAAGCAGACGGGAGGAGTTTGAGATCAACTTGGGCTACATCACGAGTTCCAGGCTCACCAAGGCTTCTTAAGGAGACCTTGTCTCTAAAATTAATTAATTAATTAATTAATAGTCCCCTTTCTCTGCCACAGAACCTTGGGATCTGGCTCCTGGTCGCAGCTCCCCCCACCCCAGGCTGACATTCACTGCC…	GAAAACACTGCTGCGCCTCTGCCAAATCACGGTACCCCTGTATCTAGTTCTGCCAGGCTTCTCCAGCCCCAGTCCCAGCCCCAGCCCCAATTCTTTTCTCTAGTGTTCCCCCTTCCCTCCCCTGAATCTCAAGCCCACACTCCCTCCTCCATAACCCACTGTTATCAAATCCAAGTCATTTGCCACCCAACAACCATCAGGAGGCGGAAGCAGACGGGTGGAGTTTGAGATCAACTTGGGCTACATCAAGTTCCAAGCTCACCAAGGCTTCTTTAGGAGATCTTGTCTCTAAAATTAATTAATTAATTAATTAATTAATTGTCCCCTTTCTCTGCCACAGAACCTTGGGATCTGGCTCCTGGTCGCAGCTCCCCCCACCCCAGGCTGACATTCACTGCC…
chr9	47062741	47062742	205.5	28.5	B6xCAST	AATCTCAGCAAAACTCAGAGAAGAGTGTGAGGGACAGGTGGGATGAGATATCCCACCCAAAGGCACCCATTTCTCACCTCTATATACTGGGCAGAGGACAGGGAGAGAAAAGAGCAAAGTGCAGAAGATGATAGAGCAGTAAGTGGGATAAGAGAATAGGACCCTAGCCTCCTAGATATCCAGCTCCTGGTTAAGACGGCAGAAAGAGAGACTAAGCAGGGGATGTTGGCGTCGGAGCTGTCCTTGCCTCTAATTCGAGTTTCTAGTCTGATGCCTTCATTTTATTCTCTCTGAAGCTAAAGCTGAGTCTTCCCACTCCCATTGGGATACCGAGCTCTATATATCCAAAGAAAGTCCTTGCGCACAGCAAACAGGTCGACGGATGGCTACAGAAACCCT…	AATCTCAGCAAAGCTCAGAGAAGAGTGGGAGGGACAGGTGGGATGAGATATCCCACCCAAAGGCACCCATTTCTCACCTCTATATACTGGGCAGAGGACAGGGAGAGAAAAGAGCAAAGTGCAGAAGATGATAGAGCAGTAAGTGGGATAAGAGAATAGGACCCTAGCCTCCTAGATATCCAGCTCCTGATTAATACGGCAGAAAGAGAGACTAAGCAGGGGATGTTGGCGTCGGAGCTGTCCTTGCCTCTAATTCGAGTTTCTAGTCTGATGCCTTCATTTTATTCTCTCTGAAGCTAAAGCTGAGTCTTCCCACTCCCATTGGGATACCGAGCTCTATATATCCAAAGAAAGTCCTTGCGCACAGCAAACAGGTCGACGGATGGCTACAGAAACCCT…
chr9	50500706	50500707	148.5	9.5	B6xCAST	GTACAGTCTGCAGTGACACAGCAATGACAATCTACATCGTCGTTACATAGTGAAATCCCACTGTCCACGCACTCCACATCCTCACAGGCACACTCACTACAATCCACTAGATTCTCTTCTTGCTCATGGTGTGCACACTCATGGTCTTGATCTGCAAGACTGATTCAAGGGGAGGTGACACAAGGAACACCACCATGGAGGGCACCATGCTAAGCAGGGCACAAAATGACCATCAAAGGTGCCCATGGGATTTACGATGGTGAGGCTGGGGAACCCATCCCCCACACACGTGAGTACTGAGGTGAGGGGCTTGCCTTGCTTTCCCTGATACATAGATTCAGAAACAGCTCTGTCACACCCTCTGGCTTTCCTCTAATTCATCAGACACATCATGACTCC…	GGTACAGTCTGCAATGACACAGCAATGACAATCTACATGTCGTTACATAGTGAAATCCCACTGTCCACGCACTCCACATCCTCACAGGCACACTCACGACAATCCACTAGATTCTCTTCTTGCTCATGGTGTGCACACTCATGGTCTTGATCTGCAAGACTGATTCAAGGGGAGGTGACACAAGGAACACCACCATGGAGGGCACCATGCTAAGCAGGGCACAAAATGACCATCAAAGGTGCCCATGGGATTTACGATGGTGAGGCTGGGGAACCCATCCCCCACACACGTGAGTACTGAGGTGAGGGGCTTGCCTTGCTTTCCCTGATACATAGATTCAGAAACAGCTCTGTCACACCCTCTGGCTTTCCTCTAATTCATCAGACACATCACGACTCC…
chr9	55123470	55123471	157.5	24.5	B6xCAST	AGTTAATAGGCTGCTAGTGTGGGGCACTAAAGGTATTTAGTTGCTGTTGGCTATCCCCAGCTCTGGCTAGCATCCTCAGTAAGGCAGCCTCAGAAGGCACCAGATCTTCGCTTCAGCCTCCACAGTCACTGCACACAAACTAGTTTATAGATTCCTGTAGTTTTATCTCATTTCATTTATCTGACAACTTGGAGTTTGTAGGTTTGCCTGAAGAATACTGCCATGACAATTTGTGGATGGGGATGATAGGAAGAGCCAAATTAGGCAATCACATGAAAACTGCTCAGGCTGGCAAAGGGGCCTGGAATTTATGGGGGAGGTTCCTGCCCCAGGTCTGATGGTGGTGGTATACATTCTGAAAAATGCTGGACTGGGAGAGGCGCCAGAAGAGTTTCATGG…	CTGCTAGTGTGGGGCACTAACGGTATTTAGTTGCTGTTGGCTATCCCCAGCTCTGGCTAGCATCCTCAGTAAGGCAGCCTCAGAAGGCACCAGATCTTCGCTTCAGCCTCCACAGTCACTGCACACAAACTAGTTTATAGATTCCTGTAGTTTTATCTCATTTCATTTATCTGACAACTTGGAGTTGTTTGGAGTTTGTAGGTTTGCCTGAAGAATACTGCCATGACAATTTGTGGATGGGGATGATAGGAAGAGCCAAATTAGGCAATCACATGAAAACTGCTCAGGCTGGCAAAGGGGCCTGGGATTTATGGGGGAGGTTCCTGCCCCAGGTCTGATGGTGGTGGTATACATTCTGAAAAGTGCTGGACTGGGAGAGGCGCCAGAAGAGTTTCATGG…
chr9	55397396	55397397	239	18.5	B6xCAST	CCTCGGGGGTGCCTCGTCTCCCTAGAAATATCTCCCAGAAGACACCCATACACAGAGTGTGAGTCTCATGAGATGGGACGGAAGGTAGCCCTGGCCTACAGTTTGGTAACCATAGCTGCCATCTGTGTGGAGCACTGTAAGAAGGGTTTAGCTCACCCCACATAGAACTGGCCACTTAACTCCAACTCACGCTTTCTATACTTACCCAGTTATAGCTTTTTTTTTTTTTTGTCAAGTAACAGCTGTCCGTACTCTGTAGCACTGATATCCAGATAATCTGCTCTGATAAGTGGGGATCCAATCCAGCTCTTCCTCTTATGGCTGAAAAACCATCTAATTCCAGCCTCGGAGTGCTTCAGTATCATTAGTTAATGAGTGTAAACAGAGGCACCCCCCAAA…	TCGGGGGTGCCTCGTCTCCCCAGAAATGTCTCCCAGAAGACACCCATACACAGAGTGTGAGTCTCATGAGATGGGAGGGAAGGTAGCCCTGGCCTACAGTTTGGTAACCATAGCTGCCATCTGTGCGGAGCACAGGATAAGAAGGGTTTAGCTCACCCCACATAGAACTGGCCACTTAACTCCAACTCACGCTTTCTATACTTACCCAGTTATAGCTTTTTTTTTTTTTTGTCAAGTAACAGCTGTCCGTACTCTGTAGCGCTGATATCCAGATAATCTGCTCTGATAAGTGGGGATCCAATCCAGCTCTTCCTCTTATAGCTGAAAAACCATCTAATTCCAGCCTCGGAGTGCTTCAGTATCGTTAGTTAATGAGTGTAAACAGAGGCTCCCCCCAAA…
chr9	59512586	59512587	405	22	B6xCAST	GAAACTCCACTTTGAGTAGAATCTGATGTCTGCCTTCTGGCCTCCACTGCATCTATACACATGTGTTGTACATACCCACACACAGTTATACACATAGTATAATTTTTTTAAAAAAAAGTATTTGAATCATCAACCAGGCAGCATACACCAGCTGATATGAGGCCTGCAACACATATACAGCAGAGGACTGTTGGGTCTGGGTTCAGTCAGAGATGGTGCACCTAACCCTCAAGAGACTGGAGGCCCCAGGGAGTTTAGAGGTCTGATAGGGTGGGGCTGGGGTGCGGACATCCTCATGGGGACAGCGGGTGGAGAGGAAGTATGTGATGTGGAATAGTCAGAGGGTGGACCAGGAGGGGAATAAAATCTGGAGTGTAAATAAATAAATAAATAAATATT…	ACTGCAAAATACATATGTTGGAAACTCCACTTTGAGTAGAATCTGATGTCTGCCTTCGGGCCTCCATGTGTTGTACATATCCACACACAGTTATACACATAGTATAATTTTTTTAAAAAAAGTGTTTGAATCATTAACCAGGCAGCATACACCAGCTGATATGAGGCTTGCAACACATATACAGCAGAGGACTGTTGGGTCTTGGTTCAGTCAGAGATGGTGCACATAACCCTCAAGAGACTGGAGGCCCCAGGGAGTTTAGAGGTCTGATAGGGTGGGGCTGGGGTTCGGACATCCTCATGGGGACAGCGGGTGGGGAGGAAGTATGTGATGTGGAATAGTCGGAGGGTGGACCAGGAGGGGAATAAAATCTGGAGTGTAAATAAATAAATAAATATT…
chr9	68820874	68820875	118	22	B6xCAST	GGCTACTGAAGCATCCCAAGCTACTTTCCCCATGTGCTCCTTGGCATGAGGAAACAGAAAACCTGGTGGGGAGTCCACAGCATCCCCAAGAAATTGACAGGAAAGGTGTCCCCAAGGGTGGCTGGGATCTTCTCCATCTCCCATGCTGTGGGCCTCAGGGTCACCCATATTCCCTCCTTTCTGGAGGTGTGCTAGAGAAGGCCTGCATCCAAGGGCCTAATCTGAGGGGTGTTGTCATGGCAACCACTGGGGACCAGGCCAGGGAGAAGCAAGCTCCTGTGGTGTACTGACTTAAGCTGGAACCAAATGAAGAGGGGAAGAGAGGTGAGCCAAGAGGAACATGTGAAATGGGAGCCTGGGTGCCAGGGTGCTGGGGGTGTTATCAGGTGCTCACTCTTG…	GCTACTGAAGCATCCCAAGCTACTTTCCCCATGTGCTCCTTGGCATGAGGAAACAGAAAACCTGGTGGGGAGTCCACAGCATCCCCAAGAAATTGACAGGAAAGGTGTCCCCAAGGGTGGCTGGGATCTTCTCCATCTCCCATGCTGTGGGCCTCAGGGTCACCCATATTCCCTCCTTTCTGGAGGTGTGCTAGAGAAGGCCTGCATCCAAGGGCCTAATCTGAGGGGGTGTTGTCATGGCAACCACTGGGGACCAGGCCAGGGAGAAGCAAGCTCCTGTGGTGTACTGACTTAAGCTGGAACCAAATGAAGAAGGGAAGAGAGGTGAGCCAAGAGGAACATGTGAAATGGGAGCCTGGGTGCCAGGGTGCTGGGGGTGTTATCAGGTGCTCACTCTTG…
chr9	73753681	73753682	408.5	58	B6xCAST	TCATATTAAAAACTCGAGGCCAAGAGAGTGCTTATAATTTGCTCTAGGCCTTCAAGCAAGTAAACGTGGAATTGTGTCCCTAAGAACCTCAAGCTAAAGATTGTATTGAGATAGAACAGAATTGAAATCTAAAGTATAGAAAAAGGAAGTTGAGGTTGACAGCCAGTGGCAAAATATAGGTCTAGTGTGTGTGAGACTTGGGGACAATTTCTAGCACTGCAGGAGAGATGTCTCACAGAGTTGGCTGCTTTTCAGAGGACCTGAGTTCAGTTCCCAGCAAACACAAACTTAAAAAAAAAATCTTTAAAAGAACAAATGCCAGACCAGTAGAAGTACTTGTGGATAAGACATAATTGTAAACTGTATCACGATGGCTAATTTCCATATCAACATTTCTAG…	TCATATTAAAAACTCGAGGCCAAGAGAGTGCTTATAATTTGCTCTAGGCCTTCAAGTGAGTAAACGTGGAATTGTGTCCCTAAGAACCTCAAGCTAAAGATTGTATTGAGATAGAACAGAATTGAAATCTAAAGTATAGAAAAAGGGAGTTGAGATTGACAGCCAGTGGCAAAATATGGGTCTAGTGTGTGTGAGACTTGGGGACAATTTCTAGCACTGCAGGAGAGATGTCTCACAGAGTTGGCTGCTTTTCAGAGGACCTGAGTTCAGTTCCCAGCAAACACATACTTAAAAAAAAAATCTTTAAAAGAACAAATGCCAGACCAGTAGAAGTACTTGTGGATAAGACATAATTGTAAACTGTATCACGATGGCTAATTTCCATATCAACATTTCTAG…
chr9	96371183	96371184	561.5	6.5	B6xCAST	ACAAACAAACAGCAACAAAACCAACAGGTTCATGATATAATCAGACATAACTTAACAAACAAGAAATAAGCCCAAATGACTGACCCACCACATGTGGGAGGTTATTTACAGCACTAAGGGGTGGTAAACCACGGGTGTTGGTTTACTGAAGGGGTGGATGGATATAAGGGTCCTGTGAATTTGGTTGTTATATTTTACACAGGTAAACATGCCTCACACCCACTAGAGTAGCACCCTACAAACCAAGCTACAGCCCCAGCCCTGATTTTCTTTTTAATTTTAGAATAATGTAACCTCTAGTTGGGCCTGGTAATAAAGGCCTGGAATAGCATCTACATAGGAGGTTGAGGCAGGAGGATTTCAGGTTTAAAGCAAGCCTGAATAAATGTGAGAGAGTCT…	ACAAACAAACAGCAACAAAACCAACAGGTTCATGATATAATCAGACATAACTTAACAAACAAGAAATAAGCCCAAATGACTGACCCAACACATGTGGGAGGTTATTTACAGCACTAAGGGGTGGTAAACCACGGGTGTTGGTTTACTGAAGGGGTGGATGGATATAAGGGTCCTGTGAACTTGGTTGTAATATTTTACACAGGTAAACATGCCTCACACCCACTAGAGTAGCACCCTACAAACCAAGCTACAGCCCCAGCCCTGATTTTCTTTTTAATTTTAGAATAATGTAACCTCTAGTTGGGCCTGGTAATAAAGGCCTGGAATAGCATCTACATAGGAGGTTGAGGCAGGAGGATTTCAGGTTTAAAGCAAGCCTGAATAAATGTGAGAGAGTCT…
chr9	104105045	104105046	179	34	B6xCAST	TAAAGTTCTTACTTACAAGTTCAATGTTAGGCTTTTTCCATTTTATCATGCTATCTCTGACACATTTCTGGTATCCCATGATGCTCCCTGTTATGCACTCTTAATATTGCTCTGTGTGTGCCTGAATATCTCTCCTCCTAATCCTTGTTTACCCTACCCTAAGAAACTATGTATTTTCTTATAATTTCAATTCCTGTCCTGTGAACCAGTTGTAATTCTGTAATAATCCTTACAGCTTTTGATTTAAAAAAAAAATCATTTTCTTCAAACTTCAACTCTCAGGCCATAAAGGGCTCCTGGCATGATGCTCTGAGTCCCACCTATGTATGAGTCATGGTGAAGAGACCCTGGCTCTGCTGGGCTTTCATTTCTTCAGATACAACTAGGAGACTTGGTGGT…	TAAAGTTCTTACTTACAAGTTCAATGTTAGGCTTTTTCCATTTTATCATGCTATCTCTGACACATTTCTGGTATCCCATGATGCTCCCTGTTATGCACTCTTAATATTGCTCTGTGTGTGCCTGAATATCTCTCCTCCTAATCCTTGTTTACCCTACCCTAAGAAACTATGTATTTTCTTATAATTTCGATTCCTGTCCTGTGAACCAGTTGTAATTCTGTAATAATCCTTACAGCTTTTGATTTAAAAAAAAAATCATTTTCTTCAAACTTCAACCCTCAGGCCATAAAGGGCTCCTGGCATGATGCTCTGAGTCCCACCTATGTATGAGTCATGGTGAAGAGACCCTGGCTCTGCTGGGCTTTCATTTCTTCAGATACAACTAGGAGACTTGGTGGT…
chr9	112950403	112950404	438	51.5	B6xCAST	TCTCACACAATAATAATTCTAACTACAATCTGAAAGCTACTAAAGCTCATGGTGAAACTTGTAGCTATATTTTTTTTTCTAACAAAAAGTGCAACGTTTTTCATTTCCAGAGCACTTTGACATTTTCCTATGAGTTCAACATGATATACAGTCGTCCACCTCAAACAAGTAGCCTTCTTTTCAGTGCCGAATTGGATGCCAGGCTTTCTCTCAATGAAGTTTGGGCTTATGGAAAATAAACAGAGTGTGATTTCTGGTTTTATCAGAAAAGACAGTCAAGATTTGGGATGGTGCCAACAGAAGGCAGGGTGTGGAAACCAACACTGCTCAGGGTGACAAAGCAATTTCATAAGGTCAGAAGACAGAAGAGAGTCTCTTAGTTGTGATGTAAACAGAGAT…	TCTCACACAATAATAATTCTAACTACAATCTGAAAGCTACTAAAGCTCATGGTGAAACTTGTAGCTATATTTTTTTTTCTAACAAAAAGTGCAACGTTTTTCATTTCCAGAGCACTTTGACATTTTCCTAGGAGTTCAACATGATATACAGTCGTCCACCTCAAACAAGTAGCCTTCTTTTCAGTGCCGAATTGGATGCCAGGCTTTCTCTCAATGAAGTTTGGGCTTATGGAAAATAAACAGAGTGTGATTTCTGGTTTTATCAGAAAAGACAGTCAAGATTTGGGATGGTGCCAACAGAAGGCAGGGTGTGGAAACCAACACTGCTCAGGGTGACAAAGCAATTTCATAAGGTCAGAAGACAGAAGAGAGTCTCTTAGTTGTGATGTAAACAGAGAT…
chr9	112993140	112993141	100.5	14.5	B6xCAST	TGGGTAAGGAGGATACAGAACATAATTCATCTGGTCAAGTCAATCTACAAATGCTCATTATTTTTCTATATACCAGGGATCAACAAGTGCCACTCCAAATTAAAGCTACTTCATTTATAGCTATATTAAAATGGAATGTTTAGGTTATATGAAACAAAGCAAGTGTCAGTTCCACTTAAGAAGTCTAGAACTCAAATCAACTCCAACAGCAACACATGCATGAAAGAAAATGTTTGAGATCTTTACACATCAGGGAACTGCTAATCAAAGCTAAAGTGAAAAAATCTCTTACTTCGGCTAGAATCATCATAAAAAAATAACAAATTCTGGTAAGAATTTGAGGTGGGGAACTCTTACATACTGTTAAGGCGAGTGTAGAATTACAAATGTTATGGAGAA…	TGGGTAGGGAGGATACAGAACATAATTCATCTGGCCAAGTCAATCTACAAATGCTCATTATTTTTCTATATACCAGGGATCAACAAATGCCACTCCAAATTAAAGCTACTTCATTTATAGCTACATTAAAATGCAATGTTTAGGTTATATGAAACAAAGCAAGTGTCAATTCCACTTAAGAAGTCTAGAACTTAAATCAACTCCAACAGCAACACATGCATGAAAGAAAATGTTTGAGATCTTTACACATCAGGGAACTGTTAATCAAAGCTAAAGTGAAATAATCTCTTACCTCAGCTAGAATCATCACAAAAAAATAACAAATTCTGGTAAGAATTTGAGGTGGGTAACTCTTACATACTGTTAAGGGGAGTGTAGAATTACAAATGTTATGGAGAA…
chr9	113566839	113566840	65.5	4	B6xCAST	GAACTGTTGAGAGCTTGAGGCAATCTTGGGCTACATAGTAATTTCCAGGCTAACCTGGACTATATTATAAGACCCTGTCCCTAAAGGTAAAAGGGAGGAGAGGGAGAGGGGGAGGGAAAGGGGAAGGGAAGGGAGAGGAAGGGAGGGTAAGGGAGGGGAAGGGAGGGGAAGGGAGGGGAAAGGAGGGGAAGGGAGGGGAAGGAAAGAAGACCCATGCCCAAATCTGCTTTGCTTCTTGCCAGAGTCAGTATGAGAAACAGTCTATGGCAGGCGAATTAGGCCACTACTTAATGGCCTGGAATTCCAATTAAAGGAAGCAGCCATTACAGACTTTATGAGGCTGTCTGGCAGTGGGGAGGAGTATCTGACCCAATCTCAGATCCCAGAATGGCTACCTTA…	TTGAGAGCTTGAGGCAATCTTGGGCTACATAGTAATTTCCAGGCTAACCTGGACTATATTACAAGACCCTGTCCCTAAAGGTAAAAGGGAGGAGAGGGAGAGGGGGAGGGGGATGGAAAGGGGAAGGGAAGGGAGAGGAAGGGAGGGTAAGGGAGGGGAAGGGAGGGGAAGGGAGGGGAAAGGAGGGGAAGGGAGGGGAAGGAAAGAAGACCCATGCCCAAATCTGCTTTGCTTCTTGCCAGAGTCAGTATGAGAACCAGTCTATGGCAGGCGAATTAGGCCACTACTTAATGGCCTGGAATTCCAATTAAAGGAAGGAGCCATTACAGACTTTATGAGGCTGTCTGGCAGTGGGGAGGAGTATCTGACCCAATCTCAGATCCCAGAATGGCTACCTTA…
chr9	113567951	113567952	228.5	27	B6xCAST	CTAACCCCATTATCAAATTAATATCCAAAGGCAGAATTATGGTGGTCATTCTTGTTCTCTTCAGATCTGTCATTTAGTCACTCATTTAACAAGTGTTTACTGATCTCCTACTCTGCACCAGGCATTGTGCCAAGAGCTGGGGCTATGATAGTGAAAAATTCTATCTACTCCACCCAAGGCTCTCACTGACGATGGTCTTGGATTAAGTTCTCTACAATCAGATTCTGAGATGAGGAAAATTATGTAGGAGTTTTACATGGGAGAACTCTCAGAAGATCAGCTGTCTGGCACAGAATTGGAAAGACAAATTGGCAGGCAGAAAGCTGGCCTGTCATGCAATTACAACTCAGGACTCAGGTGGGTTCTACAAGGGCTCCCCAACTTGGCTGGCCCTTCAGC…	CACTAACCCCATTATCAAGTTAATATCCAAAGGCAGAATTATGGTGGTCATTCTTGTTCTCTTCAGATCTGTCATTTAGTCACTCATTTAACAAGTGTTTACTGATCTCCTACTCTGCACCAGGCATTGTGCCAAGAGCTGGGGCTATGATAGTGAAAAATTCTATCTACTCCACCCAAGGCTCTCACTGACGATGCTTGGATTAAGTTCTCTACAATCAGATTCTGAGATGAGGAAATTTATGTAGAAGTTTTACATGGGAGAACTCTCAGAAGATCAGCTGTCTGGCACAGAATTGGAAAGACAAATTGGCAGGCAGAAAGCTGGCCTGTCATGCAATTACAACTCAGGACTCAGGTGGGTTCTACAAGGGCTCCCCAACTTGGCTGGCCCTTCAGC…
chr9	122209965	122209966	153	29	B6xCAST	GATGAGCCCTCTCACTGCAGGAGTGTGCACATGTCTAACTGTAGGACAGATGTATGTTTTTCCATGTTCATCACATGTCCAGCAGAGTGTGTGTTTCACCATAAATAGATGTATATTTTCTGTGAGCCACAAGATCATCACACACTTCAAGGAGCTCAGTGCCATAAATTAAGCAAACAGCCTTATGGATTCAGAGGTCTAAATCTGAAACCCTGGCGGCCACAGTGGAAAGTTAGGAGAAGGAGCACATGGGAGAAGGATGGAATGCATCCATTGTTCCGAGCCTGCTACCTGTACGAGAGAAATAACATAACCGATGCCTGCCACCTGTGCTCCTTGTTATTTATGTGAGACTGAAATCCCCTAAATTCTGACCATGCTGACCTGCAATCCTCACCC…	GTTCAGATGAGCCACTGCAGGAGTGTGCACATGTCTAACTGTAGGACAGATGTATGTTTTTCCATGTTCATCACATGTCCAGCAGAGTGTGTGTTTCACCATAAATAGATGTATATTTTCTGTGAGCCACAAGATCATCACACACTTCAAGGAGTTCAGCGCCATAAATTAAGCAAACAGCCTTATGGATTCAGAGGTCTAAATCTGAAACCCTGGCGGCCACAGTGGAAAGTCAGGAGAAGGAGCACATGGGAGAAGGATGGAATGCATCCATTGTTCCGAGCCTGCTACCTGTACGAGAGAAATAACATAACCGATGCCTGCCACCTGTGCTCCTTGTTATTTATGTGAGACTGAAATCCCCTAAATTCTGACCATGCTGACCTGCAATCCTCACCT…
chr9	123758318	123758319	136.5	16	B6xCAST	ACACGGTGAAGCAACTGTGGGACACGCTTTATATTTCTTACATCAGAAGGCTTTTGGTCATTTTTAGACATTCTTGAGATAAAATCACAATCTATTTTCTAGATTTATCTTGAACTCCAGGATTCATGAGACTCTTCTAGCACAGCCTCCCAAGAACATGGTACTACAGATAGGAATGTCCAAGCCTGGCTTGATTTTGTTACTCCTTGAGAAAACAAGTGAGGATCTAATTCTTACGTAGCCTTATTTCCTATCTTTACAATGTAGTTTTTGCATTTTTATCAGTACCAATGAATAGTTTATAGTGACACTAAAGTTGTTTACTGCAGAGTCATATAACAGGTAGTTATGAAAATTCATTACTTAAACAGCCCTTGGTTTTTCCTAGCATTTCTAATT…	AGCAACTGTGGGACACGCTTTATATTTCTTACATCAGAAGGCTTTATATTTCTTTGGTCATTTTTAGACATTCTTGAGATAAAATCACAATCTATTTTCTAGATTTATCTTGAACTCCAGGATTCATGAGACTCTTCTAGCACAGCCTCCCAAGAACATGGTACTGCAGATAGGAATGTCCAAGCCTGGCTTGATTTTGTTACTCCTTGAGAAAACAAGTGAGGATCTAATTCTTATGTAGCCTTATTTCCTATCTTTACAATGTAGTTTTTGCATTTTTATCAGTACCAATGAATAGTTTATAGTGACACTAAAGTTGTTTACTGCAGAGTCATATAACAGGTAGTTATGAAAATTCATTACTTAAACAGCCCTTGGTTTTTCCTAGCATTTCTAATT…
chr9	123840413	123840414	265	26.5	B6xCAST	TATCAAATCTAGATAACACAAAACAAAACCCAGATACACCTCATACATACAACTTTGGTAAAATGACCACAGGTCCATTTTTTTTTTCCTCCCTATTTCAAAAGCACGTACTTCCCAAATCAGCAGAGTTGTCTAGGTCAAACTAACCACACACAAAAGTTATACCATGAAAATGCTAAAAGACTGTTTACTTGACTAACCCTGATTCAGAAATAGCCAGTCCCATGGTAACCATACTTGAGGAATAAGGCTCTGAAATGGGCCTTGAATAATCTTCGAGAGGCTGCGTCTTGGAAACTGCCTTTATACCTGGCCATATACATATATCATGTCTGTAAGAGAGAAACATTACAGGGTTCGACAAGTTCTCAAAGGGTGTAATGCTGGAAAGGCCTGTGA…	ATCAAATCTAGATAACACAAAACAAAACCCAGATACACCTCATACATACAACTTTGGTAAAATGACCGCAGGTCCATTTTTTTTTTCCTCCCTATTTCAAAAGCACGTACTTCCCAAATCAGCAGAGTTGTCTAGGTCAAACTAACCACACACAAAAGTTATACCATGAAAATGCTAAAAGACTGTTTACTTGACTAACCCTGATTCAGAAATAGCCAGTCCCATGGTAACCATACTTGAGGAATAAGGCTCTGAAATGGGCCTTGAATAATCTTCGAGAGGCTGCAGTCTTGGAAGCTGCCTTTATACCTGGCCATATACATATATCATGTCTGTAAGAGAGAAACATTACAGGGTTCGACAAGTTCTCAAAGGGTGTAATGCTGGAAAGGCCTGTGA…
chr1	3426899	3426900	169	14	B6xCAST	AAATATATTCACACTCAAAACCAAGTAATTTCCTATGCTGATTCACAAATAGCTCCTGACTCTGACTCTTACCTCCACTGTCCTTGGCCTTGGGCAACTTCGAATCTTCTTTCTGTCTTTGTAAATATCTTTCCAATAGCTACTTAGTATGTTTTAAGTATGCAGTATTTAAGTATACAGTATCTGTCCAGTGATTTGTTTACTTAAATTATGTCATAATTAAATTAACATATATTAAATTACAATTAACCACATTAGTTATATCAAATTATATTTATTTAGTTCATCTATTTAAATTAATTTATTAACTTATTATTAATAATATATTAATTACATGGAATGATAATATCCTTAGGCCTCATTCACACTGTGGTGGGTTCCAAATTTCATTTCAGATAG…	ACACACAAAACCAAGTAATTTCCTATGCTGATTCACAAATAGCTCCTGACTCTGACTCTTACCTCCACTGTCCTTGGCCTTGGGCAACTTCCAATCTTCTTTCTGTCTTTGCAAATCTTTCCAATAGCTACTTAGTATGTTTTAAGTATGCAGTATTTAAGTATACAATATCTGTCCAGTGATTTGTTTACTTAAATTATGTCATAATTAAATTAACATATATTAAATTACAATTAACCACATTAGTTATATCAAATTATATTTTATTAATTCAATATTTAGTTCATCTATTTAAATTAATTTATTAACTTATTATTAATAATATATTAATTACATGGAATGATAATATCCTTAGGCCTCATTCACACTGTGGTGGGTTCCAAATTTCATTTCAGATAG…
chr1	4751446	4751447	207	31	B6xCAST	CTTTCACTACTTAATGCAAGAAAAAGGAGAAAGTGGTATCCAAAGGAAGAAATAAAATAATTGTTCATAATTATCAAGATTTTTAATATTAAAAAACTAAAGATCATTCACAAAAAGCTGAGATAGCTGTGAATGCAGCATAGTTGCTAGATACAAATTAACACACAAAAGTCAGTTCTATTCTTGTGTACTAGGAATGAACAATCTTACAAGAAAATTAAGATTTCATTATATAATATCAAAAAGAATAAAATCTACAGGAATAGACTTGTCCAAGAAGTAGAAGGACTTGTTCTTTAAAAACTGCAAAAGTTGCTGGATAGAATTTTAGAGATATAAGCAAATGGAAATATGTGTTTGTTTTGTCTTAATATCATTAAGACAGCAAAATCACATGTA…	CTTTCACTACTTGATGCAAGAAAAAGGAGAAAGTGGTATCCAAAGGAAGAAATAAAATAATTGTTCATAATTATCAAGATTTTTAATATTAAAAAACTAAAGATCACTCACAAAAAGCTGAGATAGCTGTGAATGCAGCATAGTTGCTAGATACAAATTAACACACAAAAGTCAGTTCTATTCTTGTGTACTAGGAATGAACAATCTTACAAGAAAATTAAGATTTCATTATATAATATCAAAAAGAATAAAATCTACAGGAATAGACTTGTCCAAGAAGTAGAAGGACTTGTTCTTTAAAAACTGCAAAAGTTGCTGGATAGAATTTTAGAGATATAAGCAAATGGAAATATGTGTTTGTTTTGTCTTAATATCATTAAGACAGCAAAATCACATGTA…
chr1	21839215	21839216	283	28.5	B6xCAST	AGATAGTGACTCACCCTTGCTCACCAGCGTGTCTGTTCTGGCACATTTGAACAGCCTCCAAAGCCTTGTGAACAAAGGTAATGCTTGACAAGTTTTGTTAAGAAAATCATGAGAAAGGGCAAGGATAACATGGGAACCAAGTCTCAGGGCAAACAAACAACACTGTGAACGTACACATTCAACTGCAATTAGAAGTCCAGTGGAGAGTACAGAGAGATTATCTTTTATATTTGGGTGTTTACAGAGTGTTTTAAGAGTGTTTTACAGAATCCTACCTATAGGTGATAAAGAATTACAGAAATTTAAATATACCATTATTAAGTATTGAACTATATCCCCTAAGAAGACATATGTTGGATTCCTAACTCCAGGTATCTGTGGATATGAACATATTTTGAA…	AGATAGTGACTCACCCTTGCTCACCAGCGTGTCTGTTCTGGCACATTTGAACAGCCTCCAAAGCCTTGTGAACAAAGGTAATGCTTGACAAGTTTTGTTAAGAAAATCATGAGAAAGGGCAAGGATAACATGGGAACCAAGTCTCAGGGCAAACAAACAACACTGTGGACGTACACATTCAACTGCAATTAGAAGTCCAGTGGAGAGTACAGAGAGATTATCTTTTATATTTGGGTGTTTACAGAGTGTTTTAAGAGTGTTTTACAGAATCCTACCTATAGATGATAAAGAATTACAGAAATTTAAATATACCATTATTAAGTATTGAACTATATCCCCTAAGAAGACATATGTTGGATTCCTAACTCCAGGTATCTGTGGATATGAACATATTTTGAA…
chr1	33904010	33904011	626.5	107.5	B6xCAST	CAGTTAAATTTCTCCCAAGAGTGTGGTGGTGCCTTTGAGCCCCCATTTTAACTTCTATTCCCTTTGTAACCCATTTTCTATGTTTTGGCCTCTCCCTTCTGTGATCTCTCAGTCCTCTGGAGTAACTCCTGAAAACTGCCCCTCCCAATCCCCCAGGGCTTTCTCTCTTTAACCGCTGTGCATATTCCCAGCAAGCCTTGCGGGCTGGGGAGTGGGGGTGGGGGCGAGGGGCTGGAATGCTCGCTCCTCACTCAGCGGTCCTGCCTTCGGCTCTTTCCCAGTCCACAAACCAGAGCTTCCTCCAAGCTCCAGTTCCCCTTTCTAGAGTTTCTCTTCTTACTCACTTCTTCCATGTCCATGATTTCACTAACAATCTGTGTGACTACTCTTCCCACATCC…	AGTTAAATTTCTCCCAAGAGTGTGGATGGTGCCTTTGAGCCCCCATTTTAACTTCTATTCCCTTTGTAACCCATTTTCTATGTTTTGGCCTCTCCCTTCGTGATCTCTCAGTCCTCTGGAGTAACTCCTGAAAACTGCCCCTCCCAATCCCCCAGGGCTTTCTCTCTTTAACCGCTGGTGCATATTCCCAGCAAGCCTTGCGGGCTGGGGAGTGGGGGTGGGGGCGAGGGGCTGGAATGCTCACTCCTCACTCAGCGGTCCTGCCTTCGGTTCTTTCCCAGTCCACAAACCGGAGCTTCCTCCAAGCTCCAGTTCCCCTTTCTAGAGTTTCTCTTCTTACTTGCTTCTTCCATGTCCATGATTTCACTAACAATCTGTGTGACGACTCTTCCCACATCC…
chr1	37013884	37013885	282	24.5	B6xCAST	TGAGCCTGCAATGCAGTAAAATGTCACCAAAGCCCGAGAGTCAGAGTGTAGGTGCTACAGGGATGCTCAGTGGTCTGGAGTACATGGAGCGGTAAGGGACACCTCACCCAGACGGCAGGCAGATGGAGCCTCCAGGGAACAGAAACAAACCTCCAGCTGTTTGCATCACAAACACTGGTCAAGGAGATAACAGGATGGAAGTCAAAACTTATGGTGGAGGCACACATGTAGAATCCTTGTTGTGGGCATTATAGTAATGGGGCCAGTTACAAGCTCTGGGGTCAATCTATTTCACTTATAAATCAATCAGTCATCAATAAATCAATCAGTCAGTGAATTTCCTTTATCCTCTTTCTCTCCACAGGAGAGAGGTAAGAGCACAGATGTGTGTATAGCAGA…	TGAGCCTGCAATGCAGTAAAATGTCACCAAAGCCCGAGAGTCAGAGTGTAGGTGCTACAGGGATGCTCAGTGGCCTGGAGTACATGGAGCGGTAAGGAACACCTCACCCAGAGGGCAGGCAGATGGAGCCTCCAGGGAACAGAAACAAACCTCCAGCTGTTTGCATCACAAACACTGGTCAAGGAGATAACAGGATGGAAGTCAAAACTTATGGTGGAGGCACACATGTAGAATCCTTGTTGTGGGCATTATAGTAATGGGGCCAGTTACAAGCTCTGGGGTCAATCTATTTCACTTATAAATCAATCAGTCATCAATCAATCAATCAGTCAGTGAATTTCCTTTATCCTCTTTCTCTCCACAGGAGAGAGGTAAGAGCACAGATGTGTGTATAGCAGA…
chr1	52563698	52563699	294.5	43.5	B6xCAST	AACTTAACTAGGTTTATTACTTAATTTTACCTGTCAGCTTGATACAAGGTAGATGACCTTCAAACAGAGTCTCTATAAAGAATAATCCACATCACATTGGCTATAAAGCTTGCCTGTGGAAAATTGTCTTGATTTATAATTGATATAGGACATAGCCTATTATGGGCAGTACCATTCCCTAGGCATGGAGTCCTACACATCACAATAGAGGAGAAAACTAGTTACAACCAAGCACATATGGATGTGGTTTTTTTGTCGTTTGTTTTTTTCATTTTCCCTGTACTCTTGGCTTTAGATATGATATGACTGACATCTAGGGCTCTTGACTTGCCATTCCAGAAATGATGGGTTATAATGTGGAATTGTTAGCCAAATGAATATTTTCTTCCTTAAATGTTT…	TAACTAGGTTTATTACTTAATTTTACCTGTCAACTTGATACAAGGTAGATGACCTTCAAACAGAGTCTCTATAAAGAATAATCCACATCACATTGGCTATAAAGCTTGCCTGTGGAAAATTGTCTTGATTTATAATTGATATAGGACATAGCCTATTATGGGCAGTACCATTCCCTAGGCATGGAGTCCTAAACATCACAATAGAGGAGAAAACTAGTTACAACCAAGCACATATGGATGTGGTTTTTTTGTCGTTTGTTTTTTCATTTTCCCTGTACTCTTGGCTTTAGATATGATATGACTGACATCTAGGGCTCTTGACTTGACATTCTAGAAATGATGGGTTATAATGTGGAATTGCTAGCCAAATGAATATTTTCTTCCTTAAATGTTTTTTTT…
chr1	65354413	65354414	262	39.5	B6xCAST	CCAGCGAGTGGGGGGATCTGACACTTCTTTCTTCTACTTTAGCTTCATCATTCAGAAGGAAAGGTGGGATGTGCAGTAGAAAAGGCAGCAAAAATTCACTTAAACGTGTAGGGTCCAGGAGTCGCCCCACAAACCACACAAACACCATCTCAGCCAGATGGAGATCATTTATTGAACGCACCCTCTAATACTGATTGATCTGGATCACAAAAAGGAATAACCTAATTGTGGTACCAGTCTGTTCTCAGGGAAGGCTTTTTATAGGAGAAAAAACAGACTCAAAAGTTTAAAAGGCAAGGAGGGGAGCAGTATTACATCTCACTTACTAGGCAAAGTATTTTCAGCTGAGCTTTAAGCTGATTGGTCCTGAGTGAGCAAGAGGGGTGGTGATGGGTGGTG…	GAGTGGGGGGATCTGACACTTCTTTCTTCTACTTTAGCTTCATCATTCAGAAGGAAAGGTGGGATGTGCAGTAGAAAAGGCAGCAAAAATTCACTTAAACGTGTAGGGTCCAGGAGTCGCCCCAGAAACCACACAAACACCATCTCAGCCAGACGGAGATCATTTATTGAACGCACCCTCTAATACTGATTGATCTGGATCACAAAAAGGAATAACCTAATTGTGGTACCAGTCTGTTCTCAGGGAAGGCTTTTTATAGGGAAAAAACAGACTCAAAAGTTTAAAAGGCAAGGAGGAGAGCAGTATTACATCTCACTTACTAGGCAAAGTATTTTCAGCTGAGCTTTAAGCTGATTGGTCCTGAGTGAGCTAAGAGGGGTGGTGATGGGTGGTGAAGAG…
chr1	69136331	69136332	121	19.5	B6xCAST	TTACAGAATAAAACCGTGCTGCTCATTCTTGAGATTACACGGAAATTACAATCACTCATTCATATCCATTGCTCGTGACAGTCACCTGGAACACAGGGGCACTGCCTGTAAACTGTGATTACATTATTTTTAATTTTTAAATTTTATTTAATGCGCATGTAAGTTTTGCTTATATGTGTATGCGTGCACCTTATATATATGCTGGGTGCCCTCAGAGGTCAGAAGAGGACATTAGAACCCCTGAAACTGGAGTCATGCACAGTTGTGAGTTGCCAAGTGGATGCTGGACACTGAATGTGAGTCCTCTATGACAGCAACAAGCTTTCTCAACCACTGCGTCATCTTTCTAGCCTCCTGAGCTACGTTTCTGAGCATGTCTCTATTTAATTGATCTTAGGG…	TTACAGAATAAAACCGTGCTGCTCATTCTTGAGATTACACGGAAATTACAATCACTCATTCATATCCATTGCTCATGACAGTCACCTGGAACACAGGGGCACTGCCCGTAAACTGTGATTACATTATTTTTAATTTTTTAATTTTATTTAATGCACATGTAAGTTTTGCTTATATGTGTATGCGTGCACCTTATATATATGCTGGGTGCCCTCAGAGGTCAGAAGAGGACTTTAGAACCCCTGAAACTGGAGTCATGCACAGTTGTGAGTTGCCAAGTGGATGCTGGAAACTGAATGTGAGTCCTCTATGACAGCAACAAGCTTTCTCAACCACTGCGTCATCTTTCTAGCCTCCTGAGCTACGTTTCTGAGCATGTCTCTATTTAATTGATCTTAGGG…
chr1	82977989	82977990	264	36.5	B6xCAST	TACTGTCCTGTAGTCAGGGAGTCTGGCTCATAAACATTCCAGCTAAAACTATAACCATCATGTGGACCATCAGGGTTTCTGTCCCTGTTGTACTTAATCCCGATCTTTCTCAAATGCCTTAACATGTTCGAGTCCTGCTGTTCTAGAGATAAAAATTATTCTCTTTACTCCTTGTGTGGAGTAGATGGTGTTAAATGGAGAAGATTTGGGGTTGCCATCTCATATGAGTAATACTATGCCTCTGTTTGGAGTTATCTTTCTATGATGTGGACCCGGTCACCCCGGAATTTACAAGAACCAATGAATTGCTGCTAGAACAAAAATCTCATAATGTCTGACCCAGCTGTGGTATTATGATATGTGACATTATGATAAAAATATCTTTTACATTGTAAGAGA…	TACTGTCCTGTAGTCAGGGAGTCTGGCTCATAAACATTCCAGCTAAAACTATAACCATCATGTGGACCATCAGGGTGTCTGTCCCTGTTGTACTTAATCCCGATCTTTCTCAAATGCCTTAACATGTTCGAGTCCTACTGTTATAGAGATAAAAATTATTCTCTTTACTCCTTGTGTGGAGTAGATGGTGTTAAATGGAGAAGATTTGGGGTTGCCATCTCATATGAGTAATACTATGCCTCTGTTTGGAGTTATCTTTCTATGATGTGGACCCGGTCACCCCGGAATTTACAAGAACCAATGAATTGCTGCTAGAACAAAAATCTCATAATGTCTGACCCAGCTGTGGTATTATGATATGTGGCATTATGATAAAAATATCTTTTACATTGTAAGAGA…
chr1	87154276	87154277	121.5	21	B6xCAST	CTGAAGATGCCCTGGAGAACCCGCCTTTCACTCCTTCCCCAACCGCCTTCACTTTCCCCACCTGTAGGGACACCGTGGGGCGCTATACTGGGAGTTGGAACCTCTGGAATTCTTAGCCAACCCCAGCCTTTCAGGGCGGTCGCCTGCGGGCTCCCACTCCCCGAACCCCACCTGCCTGAGGGCTGGGAATTGCGGCTCCCGCAGCTCAGCTAAACACAGCAATTACTCCAGGGAAATTACTTGCGCCCTCCTCCCGCGCTCTGCCCCTGCGCGCGCCCCGCTCCTCCCTGATCCCCTAGCTGTCCGAACCCGTATCCTTCGGACGCGGGATGGAGCAGGGGGCACGCCGGGCCAAAGATGCGGGAGGTCTCAGGTGGGGTGCGAGGATTGTCGTGGGGC…	CTGAAGATGCCCTGGAGAACCCGCCTTTCACTCCTTCCCCAACCGCCTTCACTTTCCCCACCTGTAGGGACACCGTGGGGCGCTATACTGGGAGTTGGGACCTCTGGAATTCTTAGCCAACCCCAGCCTTTCAGGGCGATCGCCTGCGGGCTCCCACTCCCCGAACCCCACCTGCCTGAGGGCTGGGAATTGCGGCTCCCGCAGCTCAGCTAAACACAGCAATTACTCCAGGGAAATTACTTGCGCCCTCCTCCCGCGCTCTGCCCCTGCGCGCGCCCCGCTCCTCCCTGATCCCCTAGCTGTCCGAACCCGTATCCTTCGGACGCGGGATGGAGCAGGGGGCACGCCGGGCCAAGGATGCGGGAGGTCTCAGGTGGGGTGCGAGGATTGTCGTGGGGC…
chr1	87687041	87687042	288	20.5	B6xCAST	GGTTTGAGCGGGAAGGCTATGCCAGAAGCCGTTGGCTTAGAATAGTGCATACTGCTTGTACAGGGCAAATAAGTCCAGAGATTCATTGCAGCAGGGCCACTGGTGACAGCTACTTAGAACAAACTGAACTCCCGAGAAGCTCTGAGAGCTAGGGTTTGGTGCTAGCTGGGTGCTCTGGCTACTGGGATGGCTGTGTGGTGCACTGCCCGTGCTACATAGATTTACCCATTCCACTGCGTGCCCATGCTTCAGAGCCTCCTGTGCGCCATGGTGTTTATGTACAGCTTTCTCTGTCAAATTAAAATAAATTAATAATAAAGGGACAATGTTAAGAGGGGAGAGAGAGAGGATGTGGATAGATATTTTGGGGGTTTTTTTCTGTTGGTTGTTTTGTTTCAA…	AGCGGGAAGGCTATGCCAGAAGCCGTTGGCTTAGAATAGTGCATACTGCTTGTACAGGGCAAATAAGTCCAGAGATTCATTGCAGCAGGGCCACTGGTGACAGCTACTTAGAGCAAACTGAACTCCCGAGAAGCTCTGAGAGCTAGGGTTTGGTGCTAGCTGGGTGCTCTGGCTACTGGGATGGCTGTGTGATGCACTGCCCGTGCTACATAGATTTACCCATTCCACTGCGTGCCCATGCTTCAGAGCCTCCTGTGTGCCATGGTGTTTATGTACAGCTTTCTCTGTCAAATTAAAATAAATTAATAATAAAGGAACAATGTTGAGAGGGGAGAGAGAGAGAGAGAGGATGTGGATAGATATTTTGGGGTTTTTTTTCTGTTGGTTGTTTTGTTTCAA…
chr1	88429759	88429760	275	45.5	B6xCAST	TGTCTTGAGGTGAGAATTACTCTGAGGGTTGAATCCTTGCTGCTGAGGAGCCCAGTTCTAGACCAAGTCCTTCAGGATGAAGCTAGAGTTAAATCTGACTAGACTGATTAATTCTGAGTTTTCAAGACTGATTCTATCTTCCCTCCCTTCACCTCCTCTCCCCTCCCCTTCCCTTCTTCCTCCATTTTCCCCGTCTAATGCTTGTTACATTAGATGCCTGAGAAGGGAAAGGAGAATCTGGGTGAGGACATAAAATTTCTAGACACTGAGCAGAGCCCAGTGACCTTTGAAGTCTAAGCACAGCCTGCAAGAGGTGCAGTGTGGTCAAGGGCCCCAGCTGGGGTTGCTGTAGTAACAGCATCAGCCACCAGTCCAAGTAGCACATGATCTCCTGTTGTA…	AGTGTCTTGAGGTGAGAATTACTCTGAGGGTTGAATCCTTGCTGCTGAGGAGCCCAGTTCTAGACCAAGTCCTTCAGGATGAAGCTAGAGTTAAATCTGACTAGACTGATTGATTCTGAGTTTTCAAGACTGACTCTATCTTCCCCTTCTCCTCCTCTCCCCTCCCCTTCCCTTCTTCCTCCATTTTCCCCCGTCTAATGCTTGTTACATTAGATGCCTGAGAAGGGAAAGGAGAATCTGGGTGAGGACATAAAATTTCTAGACACTGAGCAGAGCCCAGTGACCTTTGAAGTCTAAGCACAGCCTGCAAGAGGTGCAGTGTGGTCAAGGGCCCCAGCTGGGGTTGCTATAGTAACAGCATCAGCCACCAGTCCAAGTAGCACATGATCTCCTGTTGTA…
chr1	100661011	100661012	239.5	23.5	B6xCAST	TGCTTGTCAGAACAACATTGAGGAAGGAGATAAAAGCTATTGGCAGTGTTGATCACAGGAAAGGATCCCACCTAGTTAAAATTATTGTTTGTGTTTACAAAGGCAGACAAATTCCTGAGATTAAGATCAACCTGGAGCAGGGGTAGATTAGGCCTCAGCATGGTGGGAATGATGATATCAGAGTCATAGCTCACATAGCTAATCTATGCTCTGCACTTATAAAGGCAGGCAGATGTCTGAATTTATTTGTTATTGTTAAAATATGTGCTTGCTATCTTTTTCTAAGAATCAAGGAGCTAAAGTCTTAAAATGCTGTTTTGTGAGAAAATTAAAAGGGAACATAGAGTAAAGATTGAATAGATGCACGTATAAAAGATACATGTAGGATTTGGTCTCTGA…	GCTTGTCAGAACAACATTGAGGAAGGAGATAAAAAGCTATTGGCAGTGTTGATCACAGGAAAGGATCCCACCTAGTTAAAATTATTGTTTGTGTTTACAAAGGCAGACAAATTCCTGAGTTTAAGATCAACCTGGAGTAGGGGTAGATTAGGCCTGAGCATGATGGGAATGGTGATATCAGAGTCATAGCTCACATAGCTAATCTATGGTCTGCACTTATAAAGGTAGGCAGATGTCTGAATTTATTTGTTATTGTTAAAAAATGTGCTTGCTATCTTTTTCTAAGAATCAAGGGGCTAAAGTCTTAAAATGCTGTTTTGTGAGAAAATTAAAAGAGAACATAGAGTAAAGATTGAATAGATGCACGTATAAAAGATACATGTAGGATTTGGTCTCTGA…
chr1	144171659	144171660	114.5	21.5	B6xCAST	GAAGAAAATATTTAATAAAAAAGAACGTTTGTAACATATCTCTAAAGCATTAAAGCTAGCAAAATTTCAGGTGTACACTATGAAGTATGGAAATCGTGACACATGATTGCTTCTCTGATGGAGTTTCTCATGTGTAAATGAAAATTTTATTTTCTTAGAAATATATATTTAGAGCAAAATATATTAAAGAAGATATGTACCTATTTATCATGTGACTAAGAATTCTTTTAAGTGGCCATGGCATTTAAAAGCTACTTACTTTGAAGGGAGCCTCTTAGATTCATCTCTGCATAGCTTACAAATCCAACAGATATGCCTGCTCATTTTTTCTAAAAAAAAAAAAGTATATAGGTATATAATTTAGTCATATAAAATAATTTCTTGAGAGAGTCAATTTTC…	AGAAAATATTTAATAAAAAAGAACGTTTGTAACATATCTCTAAAGCATTAAAGCTACCAAAATTTCAGGTGTACACTATGAAGTATGGAAATCGTGACACATGATTGCTTCTCTGATGGAGTTTCTCATGTGTAAATGAAAATTTTATTTTCTTAGAAATATATATTTAGAGCAAAATATATTAAAGAAGATATGTACCTATTTATCATGTGACTAAGAATTCTTTTAAGTGGCCATGACATTTAAAAGCTACTTACTTTGAAGGGAGCCTCTTAGATTCATCTCTGCATAGCTTACAAATCCAACAGATATGCCTGCTCATTTTTTCTAAAAAAAAAAAAGTATATAGGTATATAATTTAGTCATATAAAATAATTTCTTGAGAGAGTCAATTTTCAA…
chr1	162609796	162609797	169.5	32	B6xCAST	AGGGAATGTTTCTATTTAGAGAAAACTGTCAGGCAGAGAACACATCCTTTCTGAGTTTGATATTTTGCCTCTAATGTGGAGGGCAATGGTTACCTCACAACCTTTCTAGGATCCCCTGCAAAGAAGCTAATCAACGTCTGCCCTGCCCAATTACTGCGTATTGCATGCAGTAACCAATCATTCACTGACCATATATGCACAATGGATGTGGAGTTCATTGCCTTTAGATGAAATATGAGAAACTTGAAAGCATTACCAAGCCTGTGAGTAATATGCTATCTTCCTTCTCTATGTCTCCCCTGGAAATAAGTCCTATTTGTCTGATGGGTGTGTACTTCTCACAAGGCCAAGTTGCTATTAATTGGTACCAGAAGATGCCCTGTGTATAAAAGAATGAAG…	CCTAGAGGGAATGTTTCTATTTAGAGAAAACTGTCAGGCAGAGAACACATCCTTTCTGAGTTTGATATTTTGCCTCTAATGTGGAGGGCAATGGTTACCTCACAACCTTTCTAGGATCCCCTGCAAAGAAGCTAATCAACATCTGCCCAATTACTGCATATTGCATGCAGTAACCAATCATTTACTGACCATATATGCACAATGGATGTGGAGTTCATTGCCTTTAGATGAAATATGAGAAACTTGAAAGCATTACCAAGCCTGTGAGTAATATGCTATCTTCCTCCTCTATGTCTCCCCTGGAAATAAATCCTATTTGTCTGATGGGTGTGTACTTCTCACAAGGCCAAGTTGCTATTAATTGGTACCAGAAGATGCCCTGTGTATAAAAGAATGAAG…
chr1	167422027	167422028	148	27.5	B6xCAST	TTTCTCAAAGGTAACTTATGGGCCAGGGGTGTAGCTCATTGGCACAGTACTCACTTAGAATCGTGAGGTTCCAGAAGTGCATTAAAGAAAGAGACACTTAGGTCAGAAATACTGTTGTACTTTGGTCAACTGAGGCTTAGAAATTTTATATGGTGCATAGTCTGAGAATTAGAGTTCAGGGTTAGAATTGAAGGTGTACAGATTCTGAATTCCAATTCGTGAAACACCCCACAACAGGCTGGTAGATCAGATGGCCCAATATACAAGGAAGAAAAACCAACTTTGAAGAATTTAGACAAGATAGAGAAGAGTGACTTCTTTGGAAAACAAGTGATCTCTAAGTAGATAGTTAAACCTTTAAAGTTATATTAGATCATATATTCATAATATCCTAGCCAA…	TTTCTCAAAGGTAACTTATGGGCCAGGGGTGTAGCTCATTGGCACAGTACTCACTTAGAATCGTGAGGTTCCAGAAGTGCATTAAAGAAAGAGACACTTAGGTCAGAAATACTGTTGTACTTTGGTCAACTGAGGCTTAGAAATTTTATATGGTGCATAGTCTGAGAATTAGAGTTCAGGGTTAGAATTGAAGGTGTACAGATTCTGAATTCCAATTCGTGAAACACCCCACAACAGGCTGGTAGATCAGATTGCCCAATATACAAGGAAGAAAAACCAACTTTGAAGAATTTAGACAAGATAGAGAAGAGTGACTTCTTTGGAAAACAAGTGATCTCTAAGTAGATAATTAAACCTTTAAAGTTATATTAGATCATATATTCATAATATCCTAGCCAA…
chr1	168133933	168133934	211	25.5	B6xCAST	ATGCCGCCTGGCTGTTATGGGGTAGGTGTATGAACTAAAATGTTCTAAAATGAGATTTCATGGGAGCTACAGGGAAATACCTTCACTTAGTTCATGAAAACCCAATCAGCAGCTGCTGGCGCCTGTATGCACACCTACATTAAACTGCCAAGCTCCTTTACATTTATTTACCCTCCATGTACTGCCTGTTTATTGGGCTAATAAATTGGAGGCAGTAATATCCACTCATCAAAACCCTACCTGTCTTCCAGGGCCTGGCTGTCACCTTACATTCTTGAGCCGTCTCCCCAGGTACTCTGCACACAGAGAACATGCTATTCTCTGAACAGATAAAGCATCTACTGTGTATGCCTCTTATTAAGCAATGGCTGTTTACCTCTCTGGTTGTTACTTCTCTGG…	ATGCCGCCTGGCTGTTATGGGGTAGGTGTATGAACTAAAATGTTCTAAAATGAGATTTCATGGGAGCTGCAGGGAAATACCTTCACTTAGTTCATGAAAACCCAATCAGCAGCTGCTGGCGCCTGTATGCACACCTACATTAAACTGCCAAGCTCCTTTACATTTATTTACCCTCCATGTACTGCCTGTTTATTGGGCTAATAAATTGGAGGCAGTAATATCCACTCATCAAAACCCTACCTGTCTTCCAGGGCCTGGCTGTCACCTTACATTCTTGAGCCATCTCCCCAGGTACTCTGCACACAGAGAACATGCTATTCTCTGAACAGATAAAGCATCTACTGTGTATGCCTCTTATTAAGCAATGGCTGTTTACCTCTCTGGTTGTTACTTCTCTGG…
chr1	168135860	168135861	343.5	12	B6xCAST	GAAACCCAAGGCTACACGAAAGGAATAAAGGACATTTCAACATGGACACTGGCTATAAAGACAGCCATTTAGAAGTCACCTTGGACTCTGACTCTGCCAGAAACCATTAGCCAAATTCTTAGGCTAGTACTGTACCGGTCTGGAAATCTCCATTTGGCTAGGAGCTGTTCTATTCTTTCTCTTTCCCCCATTCTCTTCCTACCACACAAAACGCACGAGACCCACCTGAGACCTAACATTTGTCTGTTTTGAGAATAGATGAGTATTTATTAGAATTAAACAGCTGGGAGCCCCGTGATATTTAGACGGGTATTAGGAGGAATGTATGAGGAGAGGATAATGCTGGGTCTTTTTGTCTGTAAACCAGCCTGGGCTTAGTTACTAAGGGGATTTCTTGGG…	GAAACCCAAGGCTACACCAAAGGAACAAAGGACATTTCAACATGGACACTGGCTATAAAGACAGCCATTTAGAAATCACCTTGGACTCTGACTCTGCCAGAAACCATTAGCCAAATTCTTAGGCTAGTACTGTACCGGTCTGGAAATCTCCATTTGGCTGGGAGCTGTTCTATTCTCTCTCTTTCCCCCATTCTCTTCCTACCACACAAAACGCCAGAGACCCACCTGAGACCTAACATTTGTCTGTTTTGAGAATAGATGAGTATTTATTAGAATTAAACAGCTGGGAGCCCCGTGATATTTAGACGGGTATTAGGAGGAATGTATGAGGAGAGGATAATGCTGGGTCTTTTTGTCTGTAAACCAGCCTGGGCTTAGTTACTAAGGGGATTTCTTGGG…
chr1	168148230	168148231	143.5	24	B6xCAST	CCAGGAGCACTATGAGGTAGATACTGGGTTTAACGATATCTCATTGTGAAGGAAATGGAGACACAGAGAGATTAAACAATCTATCAAAGGCCATATACCCTAGTGATAAAACGGGAAATGCGCACAGGGTGAAAATCCCTTGTCTGATATGCTCAGGATCAGCTGTGGTTTTGTACTTTGTATTTTTTTTTCAGATTCCGAAATACTTTTAAAAAAATTTAGATACAATGAGATACATTTGGAAGGGGATCAAATTCTACACATATAACCCATTTATGTTTCAGATACATTGTACACTCAATGCCTGTAAATAATTCTGTATACTTTTAGTGCTAAAAGTATACAGTGCTTTAGCACAGGCCAGCGGTGGAGCTTCCCACTGAGGTATCACATTGGTGC…	CAGGAGCACTATGAGGTAGATACTGGGTTTAACGATATCTCATTGTGAAGGAAATGGAGACACAGAGAGATTAAATAATCTATCAAAGGCCATATACCCTAGTGATAAAACGGGAAATGCACACAGGGTGAAAATCCCTTGTCTGATATGCTCAGGATCAGCTGTGGTTTTGTACTTTGTATTTTTTTTTTCAGATTCTGAAATACTTTTAAAAAAATTTAGATACAATGAGATACATTTGGAAGGGGATCAAATTCTACACATATAACCCATTTATGTCTCAGATACATTGTACACTCACAGCCTGTAAATAATTCTGTATACTTTTAGTGCTAAAAGTATACAGTGCTTTAGCACAGGCCAGTGGTAGAGCTTCCCACTGAGGTATCACATTGGTGC…
chr1	182727085	182727086	94.5	16	B6xCAST	TCTGTCAGTAAGGACAAATGTCTCTAGACTGTTCCACAAGTGGCAGTATGGGAGGGTCAGTATGTACTGTGCACGTTGTATTAGAGTTCTGGGCATGACTGAAAGGAATCTTGCCAAGCTCTTGGTGTACAGATGGGTAGTAATGGACACTGAAAAATAATCTCTCTGACATCAAAGATGAAGAGTCTAAACATATGGACAATAAGTATGTGTGTCTTTATGACTCTGTACTGTGGACCTCTAATCCTGGGAGCAGTGGCAGGCTGTGGACAAGGACACAGGGATTTATTTGGAAAGTACCCAATACCCCCAACTAGACTCTTAGGAGGGCCTTCCTAAGTTATACTCCTTTGTCCTCAGATACCATGTCAAATCAAGCCATGGACACCTTTACTTAAG…	TCTGTCAGTAAGGACGAATGTCTCTAGACTGTTCCACAAGTGGCAGTATGGGAGGGTCAGTATGTACTGTGCACGTTGTATTAGAGTTCTGGGCATGAATGAAAGGAATCTTGCCAAGCTCTTGGTGTACAGATGGGTAGTAATGGACACTGAAAAATAATCTCTCTGACATCAAAGATGAAGAGTCTAAACATATGGACAATAAGTATGTGTGTCTTTATGACTCTGTACTGTGGACCTCTAATCCTGGGAGCAGTGGCAGGCTGTGGACAAGGACACAGGGATTTATTTGGAAAGTACCCAATACCCCCAACTAGACTCTTAGGAGGGCCTTCCTAAGTTATACTCCTTTGTCCTCAGATACCATGTCAAATCAAGCCATGGACACCTGTACTTAAG…
chr10	6721862	6721863	113	18	B6xCAST	TGGTGTGGGGGGTTGTTTCCAGCTCCCCAGACAAGGTTAGAGAAGGAGAGACCCTATTGACAAATGAAGTCCCCAATTTTATGCCAACTCAGAAGTCTATCTTATCTGGACAATGGTAGACTTCAACCTTAATTAGATGTGAAATTTTACACTTCACCTCCATAAATAGAAACACATACAGAGTAGCCTTTTGGGGGCTAGTTTCATTCTTGAGTTGTTATGACAGTGACATGATTCTTCAAGTAATGGCAAGTCTATCTGGTAGTCATGTAGTTCCACAAGAGAGAAGTCACCTCCATTGACCTGTACATTCTACATTGACTGGAGTTTGGTGCTGGTGCAAATAAGCTGTAACACACAAAGAATTTGTGACCACTCATTTCCCTTTATCACATTTGT…	GTGTGTGGGGGGTTGTTTCCAGCTCCCCAGACAAGGTTAGAGAAGGAGAGATCCTATTGACAAATGAAGTCCCCAATTTTATGCCAACTCAGAAGTCTATCTTATCTGGACAATGGTAGACTTCAACCTTAATTAGATGTGAAATTTTACACTTCACCTCCATAAATAGAAACACATACAGAGTAGCCTTTTGGGGCTAGTTTCATTCTTGAGTTGTTATGACAGTGACATGATTCTTCAAGTAATGGCAAGTCTATCTGGTAGTCATGTAGTTCCACACAGAAAGAAGCCACCTCCATTGACCTGGACATTCTACATTGACTGGAGTTTGGTGCTGGTGCAAATAAGCTATAACACACAAAGAATTTGTGACCACTCATTTCCCTTTATCACATTTGT…
chr10	7085964	7085965	294.5	21.5	B6xCAST	AAAACCTACATTCTGAGTGCTATAGCTTCAGCTGGAGATCAAAGGAACAGAGTGGCTTCTGCCCAAGAGGACAAACAGGCAAACAGGAAGGAGCAATGCCCTCAAAGGTAGGAAAGGATGTTCAGAACTCATTCTGCTATTCTGCTCTTGAGTTAGTCACTAGCAATTTCCATAAATATTAGGAAAAATCTCACTGTTGGCAACATCCCCAGTAAGGGACAATCTATCCCTGTTTTTCTACAGACTGGGCAGTTGCTCTAGGGTCTGAGAAATTTAAAAGAGAAATAAAAATATACCCACCCCCTTCTGGAAGTTTCCCTGCTTTCATTACACTGCTCCGCATGCAGAAAGCAAAAGGGAATGAGAAAGAAGCCGGCTGCCATATGGCTAAACTCACAA…	CAAAACCTACATTCTGAGTGCTATAGCTTCAGCTGGAGATCAAAGGAACAGAGTGGCTTCTGCCCAAGAGGACAAACAGGCAAACAGGAAGGAGCAATGCCCTCAAAGGTAGGAAAGGATGTTCAGAACTCATTCTGCTATTCTGCTCTTGAGTTAATCACTAGCATTTTCCATAAACCTTAGGAAAAATCTCGCTGTTGGCAACATCCCCAGTAAGGGACAATCTATCCCTGTTTTTCTACAGACTGGGCAGTTGCTCTAGGGTCTGAGAAATTTAAAAGAGAAATAAAAATATACCCACCCCTTCTGGAAGGTTCCCTGCTTTCATTACACTGCTCGGCATGCAGAAAGCAAAAGGGAATGAGAAAGAAGCCGGCTGTCATATGGCTAAACTCACAA…
chr10	20843835	20843836	380.5	51	B6xCAST	TGTCCTCTGCCTCCAGAGAGCTTTGATTGGACCCTAGACCCGGAGATGGTTGATATAGTTCACACGTGCATTAGCATTCCAGAAAGCTTCCAATTGATTCTGATCTGTAGCCAAGATTAACAGCAGCCAACCCAAGGGCATGATTGAACAGATGCATAAACCAATTAAGAAGCAAGCTGAGCAGTGATTTGAGGAAAACAGATTTTGAGACTGGAACGACCTGGAAGCAGCTGTTGCCTTTTGTGTTTCTAGGGTTGGCTTATCAGCTCTGTAGGTTCAGGATTGTGATAGTGGTCCCCTGAGGCTGGTAAGCTGAGATGGGAAGTGGGGATTGTCCCATGACTTTCCTGGGAAGGTAGAGTAAAAGACATGTCCATATATTGCATAGGAAAGGAGCCC…	TGTCCTCTGCCTCCAGAGAGCTTTGACTGGACCCTAGACCCGGAGATGGTTGATATAGTTCACACGTGCATTAGCATTCCAGAAAGCTTCCAATGGATTCTGATCTGTAGCCAAGATTAACAGCAGCCAACCCAAGGGCATGATTGAACAGATGCATAAACCAATTAAGAAGCAAGCTGAGCAGTGATTTGAGGAAAACAGATTTTGAGACTGGAACGACCTGGAAGCAGCTGTTGCTTTTTGTGTTTCTAGGGTTGGCTTATCAGCTCTGTAGGTTCAGGATTGTGATGGTGGTCCCCTGAGGCTGGTAAGCTGAGATGGGAAGTGGGGATTGTCCCATGACTTTCCTGGGAAGGTAGAGTAAAAGACATGTCCATATATTGCATAGGAAAGGAGCAC…
chr10	24679371	24679372	176.5	31.5	B6xCAST	AAAAAGACCCTTTGTATGGCCAAAATAAGATAGGACTTTAGGAAGAGTGCTTAAACCAGCATCAAACTTATGAAAATTTCAGCATCTGTGGAGTATGCACAGGACTTGAAGATTACAGTTGTCTCAATCATATCATAATGCCAAATACACACCCACACACACACACACACACACACATGCACATATACATATAGATGTAATCATACACATATGCAAACACAGAGAAACACACAGAGACACATACACACAGAGATGCACATAGGCACACATGCATCCACAGGCACACAGACACACAGAACCCCACAACATTAATTACCTTCTTTGGCACAGCTTGGTTTCAACCCAAATATACAACCAAGAATCGTTGTTAGCACACATACTGACAAAACCTGTAAGGAG…	CAAAAAAGACCCTTTGTATGGCCAAAATAAGATAGGACTTTAGGAAGAGTGCTTAAACCAGCATCAAACTTATGAAAATTTCAACATCTGTGGAGTATGCACAGGACTTGAAGATTACAGTTGTCTCAATCATATCATAATGCCAAATACACACACACACACACACACACACACACACATGCACATATACATATAGATGTAATCATACACATATGCAAACACAGAGAAACACACAGAGACACATACACACAGAGATGCACATAGGCACACATGCATCCACAGGCACAGACACACAGAACCCCACAACATTAATTACCTTCTTTGGCGCAGCTTGGTTTCAACCCAAATATACAACCAAGAATTGTTGTTAGCACACATACTGACAAAACCTGTAAGGAG…
chr10	32985143	32985144	267.5	22	B6xCAST	GAATCACGAACAGATGACCATCTTGATGTAAATACATGGGGACTTTTAATTACAGAGCTCCGGGTCGAAACGTATCTCACACAGGAGACAGTGGATTCGACCACGAGGCTTGGAAGCTAGGGGTTTTTATAGAAAAGGAGTGGGGCTGGGGGAGGAATTGGCGTGGTTTCACATGATTGGTCCATTCAAACATCAGCAACATGATTATGAGTCAGCAGTGTAGTACGTGCAGGTCGGGGCGTATAAGAATTCTAAACCCGGGGGGCTTCTCTGACTTGACAATGCATCTGGTTAATGTTTCAGCTTTTAACTATGCTCTCTATAGAAAAGGGAGCAGGCAGGAGGTGCTGGGCTGCTGGATGGTCAATGAGTCAGCCAAGATAGTCAGAACCAGTTCCT…	GAATCACGAACAGATGACCATCTTGATGTAAATACATGGGGACTTTTAATTACAGAGCTCCGGGTCGAAACGTATCTCACACAGGAGACAGTGGATTCGACCACGAGGCTTGGAAGCTAGGGGTTTTTATAGAAAAGGAGTGGGGCTGGGGGAGGAATTGGCGTGGTTTCACATGATTGGTCCATTCAAACATCAGCAACATGATTATGAGTCAGCAGTGTAGTACGTGCAGGTCGGGGCATATAAGAATTCTAAACCCGGGGGGCTTCTCTGACTTGACAATGCATCTGGTTAATGTTTCAGCTTTTAACTATGCTCTCTATAGAAAAGGGAGCAGGCAGGAGGTGCTGGGCTGCTGGATGGTCAATGAGTCAGCCAAGATAGTCAGAACCAGTTCCT…
chr10	33051994	33051995	161	11.5	B6xCAST	TGATCAGGAGAAGAATCAGGGCAAGGGTATCCAAGCCTATCCATAGTCACCCATCTGTACTAGCTCAGTCTCACATCCTCATAAAACGTTGCTACCTAAAGCTCATGATTTTATTCTTAAGTTTCCTCAACACCTTTCACATACAATTTTCTGGCTTACTCATAGCACAAAAAACAATGACACTGGTCTGCATTTCACACTGTGAAAATTATAATAGATTTGTCTTTATTGCAAACCTGTGAAGTTTATTAACTTTATATTTAGTGCTTTTCCACATTTTTCTAGAATCCACCCATATCCATTATACCCATAGATTGGGGCTTTGAAATGTTACTCTTTCAGAGATATTTTTCACCTCTTGAACTCTGACTTTTCCATTTCCAGCATACATTATCTTAA…	TAGGTGATCAGGAGAAGAATCAGGGCAAGGGTATCCAAGCCTATCCATAGTCACCCATCTGTACTAGCTCAGTCTCATATCCTCATAAAACGTTGCTACCTAAAGCTCATGATTTTATTCTTAAGTTTCCTCAACACCTTTCACATCCAATTTTCTGGCTTACTCATAGCACAAAAAACAATGACACTGGTCTGCATTTCACACTGTGAAAATTATAATAGATTTGTCTTTATTGCAAACCTGTGAAGTTTATTAACTTTATATTTAGTGCTTTTCCACATTTTTCTAGAATCCACCCATATCCATTATACCCATAGATTGGGGCTTTGAAATATTACTCAGAGATATTTTTCACCTCTTGAACTCTGAATTTTCCATTTCCAGCATACATTATCTTAA…
chr10	61331285	61331286	415.5	61.5	B6xCAST	CTGTACCCCAGGGCCAGTTCTATTTTGCCATGACTAACAAGCCAGCCACGCCCAGATTTCCATTCTATACTTGCTCACGTCACACACGGAGGGTCTCTCTCTCTCTCTCTCTCTCTCTCTCTCTCTCTCACACACACACACACACACACACACACAGCAGGGACTTCCTATTTTTCTGCTTCTCTGTAGCCCCTGGGGTCCCTTTATTGCCCAAAGCAGCCCCAATGCCGAATGCTAAGCCATGTTCTCTTAACGGCTTCTGATTAACATGTAAGTGGATTGCTGAAGCAGGAAGGGATCTGGGAAAGACTGATTCTGGAGGGTGAGGGGCAGAAGCCAAGTTACCACATGCTGTTGGGATCTTCTGTCTCAAGGCTGGGAGAAGCTGAGATGGACAGA…	GTCCCGCTGTACCCCAGGACCAGTTCTATTTTGCCATGACTAACAAGCCAGCCACGCCCAGATTTCCATTCTATACTTGCTCACGTCACACACGGAGGGTCTCTCTCTCTCTCTCTCTCTCTCTCTCTCACACACACACACACACACACACACAGAGCAGGGACTTCCTATTTTTCCGCTTCTCTGTAGCCCCTGGGGTCCCTTTATTGCCCAAAGCAGCCCCAATGCCGAATGCTAAGCCATGTTCTCTTAACGGCTTCTGATTAACATGTAAGTGGATTGCTGAAGCAGGAAGGGATCTGGGAAAGACTGATTCTGGAGGGTGAGGGGCAGAAGCCAAGTTACCACATGCTGTTGGGATCTTCTGTCTCAAGGCTGGGAGAAGCTGAGATGGACAGA…
chr10	94741744	94741745	199	36.5	B6xCAST	AATGCTCTTAACCGCTGAGACATCTCTCTAGCCCTTAAGTAATCTTTATGTCAAAGTTTTTTCTCAAATTCAATTTTTCCTCACCAAATACAATGTATATATAAAGTATCTCAAAATCAGAAATAAGATAGCAATGAGAAAAGTGTCTTATGGAAGATCACTTTGAAGTTAGGCAGACTGAATGTAAGGTTTTTTTGTTTTGTTTTGTTTAATTAGCTTTGTGACTTTGTAATTTCTATTTAAACTTTAGTATCTACCTCCATAAATATACATTTGAGTTGTGGAAAAATTAAATGAGGTATTATACATAAAGTGCTTGTCATAAATTCTAATAACTACTCCCTAACATATTGCTGTTTTCAGCTTTGGACCTTCATAAGATCTTGAAGATAAGATCAC…	AATGCTCTTAACCGCTGAGACATCTCTCTAGCCCTTAAGTAATCTTTATGTCAAAGTTTTTTCTCAAATTCAATTTTTCTTCACCAAATACAATGTATATATAAAGTATCTCAAAATCAGAAATAAGATAGCAATGAGAAAAGTGTTTTATGGAAGATCACTTTGAAGTTAGGCAGACTGAATGTAAGGTTTTTTTGTTTTGTTTTGTTTAATTAGCTTTGTGACTTTGTAATTTCTATTTAAACTTTAGTATCTACCTCCATAAATATACATTTGAGTTGTGGAAAAATTAAATGAGGTATTATACATAAAGTGCTTGTCATAAATTCTAATAACTACTCCCTAACATATTGCTGTTTTCAGCTTTGGACCTTCATAAGATCTTGAAGATAAGATCAC…
chr10	115436398	115436399	270.5	26.5	B6xCAST	CACCACAGTCATGGCTACACACACACACACACACACACACACACACCCCACAGTCATGGCTACACACACACACACACACACCACAGTCATGGCTACACACACACACACACACACACACACACACCCCACAGTCATGGCTACACACACACACACACACACACACACACACAGTAATGGCTACACACACACACACACACACACACACACACACTCACACACACACACACCACAGTCATGGCTAGTACTCCTGTACACTGTTCTGCTGTCGACAAGAAATGTGAAGAGACTTTTAAGTGCTTGTTTTTCACAGGTATTAGAATAGATCTCCATGGTCCTCGCAAGAAGGATGCTGTAAGACCTTTTTCAGCATTTTCTCAAAACAGAATTGGGCATATTTTC…	CACACACACACACACACACACACCCCACAGTCATGGCTACACACACACACACACACACCACAGTCATGGCTACACACACACACACACACACACACACACACCCCACAGTCATGGCTACACACACACACACACACACACACACACACAGTAATGGCTACACACACACACACACACACACACACCACAGTCATGGCTACACACACACACACACTCACACACACACACACCACAGTCATGGCTAGTACTCCTGTACACTGTTCTGCTGTCGACAAGAAATGTGAAGAGACTTTTAAGTGCTTGTTTTTCACAGGTATTAGAATAGATCTCCATGGTCCTCGCAAGAAGGATGCTGTAAGACCTTTTTCAGCATTTTCTCAAAACAGAATTGGGCATATTTTC…
chr11	3156729	3156730	192	3	B6xCAST	AAATTTTGAGGCAAAATACTAATGAATGTTGAGGCTACATAGTATGTAGATCATGTGCTTAATCATTTTAAAAAAATCTACACTCAGAAATAAAACCAATGAAGAGAATTGTTGCCCCTGCTCAACAAACCATTGAAGGGAACTGCCTATGGGGGAAACATACCAACAGCCTTTCAAGTACAGGACTCCGTGGGGTCTATACTGTCTAACAATACCCTAGGTCAAGAGAAAAGCCAGTCCTTAACATCCAAATCAAGCCCTGGTTTTCTTAGCAAACTCCAGTAGTAGGACGGGGTGGGTAGGGAACACTAAAGAGGCTAAAACAAATTTCTCTATCAGCAGGTACAGACTAACAATGGAAACAGGCAGTATGATTATGGAGTCTAAAGGAAATCAAGT…	AAATTTTGAGGCAAAATACTAATGAATGTTGAGGCTACATAGTATGTAGATCATGTGCTTAATCATTTTAAAAAAATCTACACTCAGAAATAAAACCAATGAAGAGAATTGTTGCCCCTGCTCAACAAACCATTGAAGGGAACTGCCTATGGGGGAAACATACCAACAGCCTTTCAAGTACAGGACTCCGTGGGGTCTATACTGTCTAACAATACCCTAGGTCAAGAGAAAAGCCAGTCCTTAACATCCAAATCAAGCCCTGGTTTTCTTAGCAAACTCCAGTAGTAGGACGGGGTGGGTAGGGAACACTAAAGAGGCTAAAACAAATTTCTCTATCAGCAGGTACAGACTAACAATGGAAACAGGCAGTATGATTATGGAGTCTAAAGGAAATCAAGT…
chr11	7347175	7347176	209	36.5	B6xCAST	TCGAGGCCAGCCTGGATACACAGAGAAACCCTGTCTTGAAAAACCAAACCAACCAACCAACCAACCAACCAAACAACCAACCAACCAACAACAAACTAGTCCGTACAGCCTATTGTGAATGGAAATGCCTGACATTAATTGACTTGATGTTGAGGAAGGAATTAAAAGGCTGAGGGAAATTGAAACGGTGGCGATGATTTGCCATCTGAAACCTTTTTCTTTACAATGGGGTCGGGTAAATCCAGAAGACATGCTTTTCACTGATACCATAAGAAATAAAGTTTGAGAAACTCTGCTGTTGCTCTTCTCTGTGTGCCAGATGTCTATGGGTGTGTCAGCTGATCAGCTCTTCACTGTTGCATAACAACCTATCTCCAAGTCAGTCCCTGGAGATTGTAA…	TTCGAGGCCAGCCTGGATACACAGAGAAACCCTGTCTTGAAAAGCCAACCAACCAACCAACCAACCAACCAACCAACCAACCAACCAACAACAAACTAGTCAGTACAGCCTATTGTGAATGGAAATGCCTGACATTAATTGACTTGATGTTGAGGAAGGAATTAAAAGGCTGAGGGAAATTGAAATGGTGGCGATGATTTGCCATCTGAAACCTTTTTCTTTACAATGGGGTCGGGTAAATCCAGAAGACATGCTTTTCACTGATACCATAAGAAATAAAGTTTGAGAAACTCTGCTGTTGCTCTTCTCTGTGTGCCAGATGTCTATGGGTGTGTCAGCTGATCAGCTCTTCACTGTTGCATAACAACCTATCTCCAAGTCAGTGCCTGGAGATTGTAA…
chr11	11973503	11973504	185	28.5	B6xCAST	TAGTAGTGGAGCAGTATTTAGTTCACTTATGAAAGGAGGGAACCAGAGGATGGCTAAGGAGAAGACCTCAGTGGGAACAGAAGTTACATTAGAGTTCATAAGTCTGGCACTGACAGGAGAGTTCCAGAATCTGTGCCTGACACATCTACATTCAGGGTTAATTAACATATTTAAATTATTTTGTCCCCCAAACAATTATTTTGTTAACAATGAACCATTAAGAATTACCCATGCTTCTACTCAAAAGTAAGCATTTCTATGATGACAGATCATTTTGGAAGCAACACAGGGTGAAACGCAAAGTTCACTATACTAAAGAGTGTGTGTGTGTGAGAGAGAGAGAGAGGTCCATTCACTGACTAAAAGAACCAAGTTTTGCTCCATGCAGAGCTACTTCCT…	AGTGGAGCAGCATTTAGTTCACTTATGAAAGGAGGGAACCAGAGGATGGCTAAGGAGAAGACCTCAGTGGGAACAGAAGTTACATTAGAGTTCATAAGTCTGGCACTGACAGGACAGTTCCAGAATCTGTGCCTGACACATCTACATTCAGGGTTAATTAACATATTTAAATTATTTTGTCCCCCAAACAATTATTTTGTTAACAATGAACCATTAAGAATTACCCATGCTTCTACTCAAAAGTAAGCATTTCTATGATGACAGATCATTTTGGAAGCAACACAGGGTGAAACGCAAAGTTCACTATACTAAAGAGTGTGTGTGTGTGTGAGAGAGAGAGAGAGAGGTCCATTCACTGACTAAAAGAACCAAGTTTTGCTCCATGCAGAGCTACTTCCT…
chr11	42232575	42232576	128.5	23	B6xCAST	AATATCCAAAGTTTATGACCAAAATAGGCATCAGGGTGGTAGAAACCATTTATGGATTAGACATGAAGGAGTGTGCTTTCAGGATGAGGATACAAGGCAGAGTATATTTTGAACAAATAATATCGTACAAATGAGAATATGGAAGGTATTGCTATCCCAAATTAGGAGCCGAGGAAAGCTTGGAGAGGCTGGAGCTCAAGAAGAGATGTTGTTGACTGAAACACTGTGGTCTACAGAGAGCCTCAGCAACAGTAACAGCAGTTGGAAATTTTGTGAATACATGTAAAGGAACATGGATTTTTTGGAGAAGTGAAATAAAGCAGTTGAAATACAGGCAGAGAAGGAAAGAATTCTTTGAGTGGAACTGTAGAAGTATTAGTTTGTACAAGCCTTGGAAGG…	AATACCCAAAGTTTATGACCAAAATAGGCATCAGGGTGGTAGAAACCATTTATGGATTAGACATGAAGGAGTGTGCTTTCAGGATGAGGATACAAGGCAGAGTATATTTTGAACAAATAATATCGTACAAATGAGAATATGGAAGGTATTGCTATCCCAAATTAGGAGCCAAGGAAAGCTTGGAGAGGCTGGAGCTCAAGAAGAGATGTTGTTGACTGAAACACTGTGGTCTACAGAGAGCCTCAGCAACAGTAACAGCAGTTGGAAATTTTGTGAATACATGTAAAGGAACATGGATTTTTTGGAGAAGTGAAATAAAGTAGTTGAAATACAGGCAGAGAAGGAAAGAATTCTTTGAGTGGAACTGTAGAAGTATGAGTTTGTACAAGCCTTGGAAGG…
chr11	46846866	46846867	123.5	21	B6xCAST	AGAGAGAGAGAGGAGAGAGAGAGAGAGAGAGAGAGAGAGAGAGAGAGAGAGAGAGAGAGAGAGAGATTATTAAGGAGTTTAAAGGTTTAAAGTCTAAATGAGAGAAGACTGGAATCCTGATGTTTCCCATTTCCATAAGGAAAAGCTTTGATTTGCAGTGGCTCTCACAGTTGATGTGTATAGGGGAAGGCCACATTATAACCCTGAGATTTATAGCAACCTAGTTTCTCAACATTGACCTTGGAATGAAATAGGTAACACAATTGTTAGCTGTCTAAATTGCATTCTGGGCACTCAGTTAAGGATTTCAAAGCCGCCATTGAATCTGGAAGCAGTTTAGGGAGGCAGGCTTGTTATCCTGAGATCGGCTGACCCTATGTCAGGTTTCAAATTGGCAAT…	AGAGAGAGAGGAGAGAGAGAGAGAGAGAGAGAGAGAGAGAGAGAGAGAGAGAGAGAGAGAGAGAGTATTAAGGAGTTTAAAGGTTTAAAGTCTAAATGAGAGAAGACTGGAATCCTGATGTTTCCCATTTCCATAAGGAAAAGCTTTGATTTGCAGTGGCTCTCACAGTTGATGTGTATAGGGGAAGGCCACATTATAACCCTGAGATTTATAGCAACCTAGTTTCTCAACATTGACCTTGGAATGAAATAGGTAACACAATTGTTAGCTGTCTAAATTGCATTCTGGGCACTCAGTTAAGGATTTCAAAGCAGCCATTGAATCTGGAAGCAGTTTAGGGAGGCAGGCTTGTTATCCTGAGATCTCGGCTGACCCTATGTCAGGTTTCAAATTGGCAAT…
chr11	49621519	49621520	240.5	13	B6xCAST	TCTGAGTCATAGTAACGAGGACCATTCGGTCTGCAAGGAGTAAAACCAACGGGACCTGACCAGTAGGAAGGGCTTCGTGAAGCAAGGCTGAGCTTCTCTGGAATGTGGTATCCTGAAACAGAGAAGTACAGGCAAAAGGACAATTCAGGTGATAGGCTGTGAGTCTCCACTGCATCCAGACGAGGGCAGAGCCAGGAGAAGACAGAGGGTGGTGGATAATTTTGATCAAGGTGACACATTCATCAGTGGTGGATAAGGACACCTGAGCAAGAAGGAAAGGAAAAAGGAAAAGGAAGGAAACAAAGAGTAACAGGCATCCGGGGATGGTGTGATTTCGAGTGGTGACCACATCCAGGGTGTGCCCCTGGAAGCTAGCGGCTGAGGGGGAGAGAAGGAGAG…	ATTCTGAGTCATAGTAACGAGGACCATTCGGTCTGCAAGGAGTAAAACCAACGGGACCTGACCAGTAGGAAGGGCTTCGTGAAGCAAGGCTGAGCTTCTCTGGAATGTGGTGTCCTGAAATGGAGAAGTACAGGCAGAAGGACAATTCAGGTGATAGGCTGTGAGTCTCCACTGCATCCAGACTAGGGCAGAGCCAGGAGAAGACAGAGGGCGGTGGATAATTTTGATCAAGGTGACACATTCATCAGTGGTGGATAAGGACACCTGAGCAAGAAGGAAAGGAAGAAGGAAAAGGAAGGAAACAAAGAGTAACAGGCATCCGGGGATGGTGTGATTTCGAGTGGTGACCACATCCAGGTGTGCCCCTGGAAGCTAGCGGCTGAGGGGGAGAAAGGAGAG…
chr11	51061166	51061167	407	58	B6xCAST	TCCATGAAAGTTTTTTTCTTATTGTGTATGTATGTGTGATGCAGTATGTATATATGTGTATATGCGTATTCTCATGTACTTGGTCACGTGTTTGGATGGCTGTATCTCTGTGTGAGGATATACATCTGCACATGTGTGTCAAAGCCTGAGGCTATAGGGTGGCTTCTCCCATGGAGTTGTCTGTCCCTCACAGGTGTCCGTGACATTTGAAGACGTGGCCGTGCTCTTTACCCGGGATGAGTGGAAGAAGCTGGTTCCCTCTCAGAGAAGCCTGTACCGTGAGGTGATGCTGGAGAACTACAGCAACCTGGCCTCGCTGGGTAAGAGAGTGCCCTGTGGGCAGAGACTCACAAGCAAGACCTCGTGCCTTCTCTCCCAAATGGAGATTTCATTGTGAAA…	TCCATGAAAGTTTTTTTCTTATCGTGTATGTATGTATGATGTGGTGTGCATACATGTGTATATGCGTATTCTCATGTACTTGGTCACGTGTTTGGATGGCTGTATCTCTGTGTGAGGATATACATCTGCACATGTGTGTCAAAGCCTGAGGCTATAGGGTGGCTTCTCCCATGGAGTTGTCTGTCCCTCACAGGTGTCGTTGACATTTGAAGACGTGGCCGTGCTCTTTACCCGGGATGAGTGGAAGAAGCTGGTTCCCTCTCAGAGAAGCCTGTACCGTGAGGTGATGCTGGAGAACTACAGCAACCTGGCCTCGCTGGGTAAGAGAGTGCCCTGTGGGCAGAGACTCACAAGCGAGACCTCGTGCCTTCTCTTCCAAATGGAGATTTCATTGTGAAA…
chr11	51937503	51937504	233	24	B6xCAST	AGTTTGGGAGAATGCTGGCTGTGGTGACTGTCAGCCCAATGTGTTGGGAAATGTAAGTTTGGCTCAAGCAAGCAGAGGAACACAGGATCTGACAAAGATGGCCAGCTCAGGGATGCAGGACCCAAGACCTCATCCACTTGGGCCACCTCCCCTAATCATGGGCACAACCAGGTAGGTAGAACACCCCACACTACCTTCCATGCCACAAGTCCCACAGACTTCACTCTGTCCAACCTCTTTACCCTCATCTTCAGTTAGGCCCCAATATCTATGCTGCCCACAGCAGGACAACCAGCCATCCCCACTAGAAGGGCCTCGTCAGGAACCTGCTATTCTGTTTGCAGATTTTGCCTTCTTCTAAGGCCAGGGTTCCCTGTCACTGGCCACTCAGTAAAGCCA…	AGTTTGGGAGAATGCTGGCTGTGGTGACTGTCAGCCCAATGTGTTGGGAAATGTAAGTTTGGCTCAAGCAAGCAGAGGAACACAGGATCTGACAAAGATGGCCAGCTCAGGGATGCAGGACCCAAGACCTCATCCACTTGGGCCACCTCCCCTAATCATGGGCACAACCAGGTAGGTAGAACACCCCACACTACCTTCCATGCCACAAATCCCACAGACTTCACTCCGTCCAACCTCTTTACCCTCATCTTCAGTTAGGCCCCAATATCTATGCTGCCCACAGCAGGACAACCAGCCATCCCCACTAGAAGGGCCTCGTCAGGAACCTGCTATTCTGTTTGCAGATTTTGCCTTCTTCTAAGGCCAGGGTTCCCTGTCACTGGCCACTCAGTAAAGCCA…
chr11	75208646	75208647	187	25.5	B6xCAST	TTTGTGACTATAGAAGAGTTTTGAGGATAGGGATGAAGAGGAATATGCCTCTTGCTCCTGACTCGTGCTGGGGAGTCGATGGATTTTTAGATTCCTTGACTGAGGGGGTAGTTCAGTTGCCTGGCAAACATAAGGTCCTGTGTTCCATATGCCTTTCATCCCAGCTCTTGGCAAGTAGAGGTAATAGGGTCAGAAGTTCAGATCATCCTTCACTACATAGCAAGTTCAAGGTCATCCTGGATACATACGTGGAGGGGAGGGGGATTGTAAATTCTTTGAAATTTGATGCTAAAGCATTCTGATCCCTCAACTGAGGAAGCAGGCTCAGAGAGTTAGAACGATTTTCCCGCTGTCACACAGCATTGAAAATAGTCGGCTTCAGGGCTAAGGGGGATGGTT…	TGGTTTGTGACTATAGAAGAGTTTTGAGGATAGGGATGAAGAGGAATATGCCTCTTGCTCCTGACTCGTGCTGGGGAGTCGATGGATTTTTAGATTCCTTGACTGAGGGGGTAGTTCAGTTGCCTGGCAAGCATAAGGTCCTGTGTTCCATATGCCTTTCATCCCAGCTCTTGGCAAGTAGAGGTAATAGGGTCAGAAGTTCAGATCATCCTTCACTACATAGCAAGTTCGAGGTCATCCTGGATACGTGGAGGGGAGGGGGATTGTAAATTCTTTGAAATTTGATGCTAAAGCATTCTGATCCCTCAACTGAGGAAACAGGCTCAGAGAGTTAGAACGATTTTCCCCGCTGTCACACAGCATTGAAAATAGTCAGCTTCAGGGCTAAGGGGGATGGTT…
chr11	83717299	83717300	323	25	B6xCAST	GGAAACTAACTTTGCAAGCTGTCCTTGACCTCCACATACACACTGTGAGATACCCACATCCATAAACACATGGCACACAACCACCTATAACCACAGCTCTAGTGAGCCTAACACCCTGTTCAGGTCTTGAAAAGTGCCAACACACATGTGCACATACACAGAAATGAAAATCAATCTTTTAAAATAATTTGGTTGACTGAGTCAAATGCAGCATCTCAAATTCAAGATAAAACAACCATCCCCAAAAGAGTGGGGGGGGGAGGGGAGGGGGAGGGAGAGCCTTTGTTGTAAAGAATGATTTGTTGTATATCTACTATCCATTCGAAAATGAATCTTCAGAGTTTGTGTTTCTAAGTTCCGGATATTTGCGCAATGTCATCTCACAGACTGTAGATGAGA…	TCCTTGACCTCCACATACACACTGTGAGATACCCACATCCATAAACACATGGCACACAACCACCTATAACTACAGCTCTAGTGAGCCTAACACCCCGTTCAGGTCTTGAAAAGTGCCAACACACATGTGCACATACACATACATATACACAGAAATAAAAATCAATCTTTTAAAATAATTTGGTTGACTGAGTCAAATGCAGCATCTCAAATTCAAGATAAAACAACCATCCCCAAAAGAGTGGGGGGGGGAGGGGGAGGGAGAGAGGGGGAGGGAGAGCCTTTGTTGTAAAGAATGATTTGTTGTATATCTACTATCCATTCGAAAATGAATCTTCAGAGTTTGTGTTTCTAAGTTCCGGATATTTGCGCAATGTCATCTCACAGACTGTAGATGAGA…
chr11	90286725	90286726	511	17.5	B6xCAST	AGATCTGAGGGCTAGAGAGATGGCTCAGTGGTTAAGAGCACTGACTGCTCTTCCAGAGGTCCTGAGTTCAAATCCCAGCAACCATATGGTAGCTCACAACCATCTGTAATAAGATTGGATGCCTTCTTCTGGAGTGTCTGAAAACAGCTACAGTGTACTTACATATAATAAATAAATAAATCTTAAAAAAAAAAAGAAAGAAAAGAAAAGGAGTTTGAGCCAGGTGCCAAGGGAGTTAGGTCATCCTACTGGTTATTGGGACTCCAGAAAGGAAAAAAAAAAAAAGATCTGAAGGAGTTTATAAGAGGCTTCAACCAGTCATTAAATTCATTCAACTAGGGGAGCCCTTCCTATGTGCTGCATGCTTTTCCAGGTGTCTGCCTGAAGGCAGAAAGCAAA…	GTTAAGAGCACTGACTGCTCTTCCAGAGGTCCTGAGTTCAAATCCCAGCAACCATATGGTAGCTCACAACCATCTGTAATGAGATCGGATGCCTTCTTCTGGAGTGTCTGAAGACAGCTACAGTGTACTTACATATAATAAATAAATAAATCTTAAAAAAAAAAAGAAAGAAAAGAAAAGGAGTTTGAGCCAGGTGCCAAGGGAGTTAGGTCATCCTACTGGTTATTGGGACTCCAGAAAGGAAAAAAAAAAAAAGATCTGAAGGAGTTTATAAGAGGCTTCAACCAGTCATTAAATTCATTCAACTAGGGGAGCCCTTCCTATGTGCTGCATGCTTTTCCGGGTGTCTGTGTGAAGGCAGAAAGCAAAACAGACAAGATGCTGTATCATGGGTATAGA…
chr11	113281066	113281067	261	24.5	B6xCAST	CCATCTTGTATTCTGAGACATCTCACTGATACCTGGAATGTACCAGTTCAGCCAGATTGGTTGACTAGTGAGCCCCGGGAATCTGACTATCTTCCCCCCCCCTCCCCCTCCTCCTCCAGGATGACAAGAAGATGCCACTCTGTGAGTTCTAAAAGCTGGAACTCTTGTCATCTTGCATGTCTGACCAACACCTTTCTTCCTGAACCTTTGCCCCAGCCGTTGCCCCCAATTTTCCTGATGAACTTAGGTGATTCTTTTAAGGCCAAAGTTCAGACAGATTCAGTCCATAAGTAACTGTGGAGAGCTAATAGATATTTTTGCTAAGCAAGTTCAAGCCAAGGTTTTCAGAGTCCCTGAGTAACTGCAGGGACAGCTTAGCTAGCTCCTCCTTGGCGTGTC…	CCATCTTGTATTCTGAGACATCTCACTGATACCTGGAATGTACCAGTTCAGCTAGATTGGTTGACTAGTGAGCCCCGGGAATCTGACTATCTTCCCCCCCCCTCCCCCTCCTCCTCCAGGATGACAAGAAGATGCCACTCTGTGAGTTCTAAAAGCTGGAACTCTGGTCATCTTGCGTGTCTGACCAACACCTCTCTTCCTGAACCTTTGCCCCAGCCGTTGCCCCCAATTTTCCTGATGAACTTAGGTGATTCTTTTAAGGCCAAAGTTCAGACAGATTCAGTCCATAAGTAACTGTGGAGAGCTAATAGATATTTTTGCTAAGCAAGTTCAAGCCAAGGTTTTCAGAGTCCCTGAGTAACTGCAGGGACAGCTTAGCTAGCTCCTCCTTGGCGTGTC…
chr11	116164122	116164123	642	61	B6xCAST	CAGCCTTCCAGCCTCTGAGAAGCCGGTGTGGCTCTCTGAGATGGCATCCGAACCCACGCAGGACCTCTCACAGACCCATGCCCTCCAGTTGACACCACCCAGAGCTGGACTGGTTGCACCCTTCCAGTTACTCTCTGATGGAGGCGAGGCAGGGGGTGAGCATGCTTGAAATGATTCTTCTAGCCAGCTTTACTTGCCCTGACCCCCCTTAACCTCACATGGTACGTCCCTGGACTCAGAGCTCAGTGAGGAATATTTTCTCTATAACTTCATTTATTCACTTGATGAAGTGTCGGGCAGTACAGTCAGCCCTGTGGCTTTCTCCAGTAAGGGCTGCTCTCTCCACCCCTTTCTCTAGGTTAGCGGATCAGCAAAGTCCTGCTTCATCACACTCAGCCT…	CAGCCTTCCAGCCTCTGAGAAGCCGGTGTGGCTCTCTGAGATGGCATCCGCACCCACGCAGGACCTCTCACGGACCCGTGCCCTCCAGTTGACACCACCCAGAGCTGGACTGGTTGCACCCTTCCAGTTACTCTCTGATGGAGGCGAGGCAGGGGGTGAGCATGCTTGAAATGATTCTTCTAGTCAGCTTTACTTGCCCTGACCCCCCTTAACCTCACATGGTACGTCCCTGGATTCAGGGCTCAGTGAGGAATATTTTCTCTATAACTTCATTTATTCACTTGATGAAGTGTCGGGCAGTACAGTCAGCCCTGTGGCTTTCTCCAGTAAGGGCTGCTCTCTCCACCCCTTTCTCTAGGTTAGCGGATCAGCAAAGTCCTGCTTCATCACACTCAGCCT…
chr11	119579924	119579925	174.5	26	B6xCAST	AGACTCCTTGCTCATCTGTGATTTATCATCAAAGGAAAAACTGGTTCCTCAAACCTCTTCAAGACTCAGCAAGCGCACGCGCGCGCGCGCGCGCACACACACACACACACACACACACACATACACACACACACACGCACCCCTCTGGGCATCTTTGTAAGTTTATCTGTTACTGGTAACTTCTTGTTTATAGACCTTGCAGTGGGCAGTCTGCAAGGGTAGCTGAGGATCAAGCTCCCTTCAGGAATGGAGCCGCTTAACATCAGGGCCTCAAGATGGGAGGGAGAACATAAGACAGGAACCGTACAGCATACGGAGAATCTGAACATGACGGGGCTTTAAAGGAAAGGCTGGCTTCCCTTTAGAAGCTTGTGAGGGGGAGGCAGATGTTGAGGGCAG…	CTCTGTCCCTTCTAGTCCTGAAGACTCCTTGCTCATCTGTGATTTATCATCAAAGGAAAAACTGGTTCCTCAAACCTCTTCAAGACTCAGCACGCGCACGCGCGCGCGCGCGCGCACACACACACACACACACACACACACCCCTCTGGGCATCTTTGTAAGTTTATCTGTTACTGGTAACTTCTTGTTTATAGACCTTGCAGTGGGCAGTCTGCAAGGGTAGCTGAGGATCAAGCTCCCTTCAGGAATGGAGCCGCTTAACATCAGGGCCTCAAGATGGGAGGGAGAACATAAGACAGGAACCGTACAGCATACGGAGAATCTGAACATGACGGGGCTTTAAAGGAAAGGATGGCTTCCCTTTAGAAGCTTGTGAGGGGCAGGCAAATCTTAAGGGCA…
chr12	11838318	11838319	118.5	17	B6xCAST	GTTTTGTTTTTAAGTTAAGAAAATTAAATCTGCTGAACATATAGCACAATGCTTTAAAGAGGAAACAACCTCACCATTAGCTTTTCTACAGAGGATAAGCTGAGAGTTGGGTGAGAATGTGACAACCCAGCAGCTGGCAAATCTCAGCCAACAGGGAAAATCTACTGCATTGCAGAGACTGCTACTGCGAGGAAAACAACAGGAAAATGCTTGCCAGGCTCTGCTGGCTGAGTGGAGAAGCTCAGCTACAGTACTGAGCTACATGGAGACAGGAAGCAGCATTCTCTGCTTCCAGCAGAAATCTGAAGGATCTAATAGGGTGGACAAGAAACAGCCCTCTTATCAGAAAGATTTCAGATAGAAATAGTCCTGTGGCTATAAATAAAGTAAAATTAGACT…	TTTGTTTTGTTTTAAGTCAAAGAAATTAAATCTGCTGAACATATAGCACAGTGCTTTAAAGAGGAAACAACCTCACCATTAGCTTTTCTACAGAGGATAAGCTGAGAGTTGGGTGAGAATGTGACAACCCAGCAGCTGGCAAATCTCAGCCAACAGGGAAAATCTACTGCATTGCAGAGACTGCTACTGCGTGGAAAACAACAGGAAAATGCTTGCCAGGCTCTGCTGGCCGAGTGGAGAAGCTCAGCTACAGTACTGAGCTACATGGAGACAGGAAGCAGCATTCTCTGCTGCCAGCAGAAATCTGAAGGATCTAATAGGGTAGACAAGAAACAGCCCTTTTATCAGAAAGATTTCAGATAGAAATAGTCTTGTGGCTATAAATAAAGTAAAATTAGA…
chr12	11876491	11876492	218	31	B6xCAST	GTGTAAAGTGGTCTCTGGTTCAGTGGCCATGGAGAAGAGGAATGAGCTAGCACTGAGTGTGAGTCACACTTATCACTATTTTGCACATGGAGAAAGACTGTCTCACATCTTTTTGTCACAATAGCTATACAGCATATTTGCTCAAATTCAAGTTTATCATATATTTAAAATATTTTGTTATGATATGAATTTGGAAATTATGCTCAGTTTTATGTTGGCAAGGAGAGTTTGTTCCACTGTTGTGCCCCGGAAGAATCATTTTCTATGTGTCACCTGCTCTAGCATCTAACTATTATCCTTGACTTCTTAGAAGAAGTCTTTCCAAGGCATACCTATGCAGCATCTTTTCCCTGAAGAAACTTCAGAAACACTTTCCATCTTCCTATCCAGCTCACAGAG…	TTGGTGTAAAGTGGTCTCTGGTTCAGTGGCCATGGAGAAGAGGAATGAGCTAGCACTGAGTGTGAGTCACACTTATCACTATTTTGCACATGGAGAAAGACTGTCTCACATCTCTTTGTCACAAGAGCTATACAGCATATTTGCTCAAATTCAAGTTTATCATATATTTAAAATATTTTGTTATGATATGAATTTGGAAATTATGCTCAGTTTTATGTTGGCAAGGAGAGTTTGTTCTACTGTTGTGCCCCGGAAGAATCATTTTCTATGTGCCACCTGCTCTAGCATCTAACTATTGATCCTTGACTTCTTAGAAGTCTTTCCAAGGCATACCTATGCAGCATCTTTTCCCTGAAGAAACTTCGGGAACACTTTCCATCTTCCTATCCAGCTCACAGA…
chr12	15078826	15078827	177	13	B6xCAST	ATATATTACAATCTATGATGCTTTTTTTTCCATGAAGTTTTCTAGTAAAATTTTAAGATATCATTACAAATGTTACCATTTGTAATCCTGAGTAAAATCATATCAAAAACGTGGGATTCTGATCTTCAGATACAATTATGAGGCACAGAAAGCAGACAGATACAAAGGAGGACACTTGATACAATTAGATTAACAAACATAATTATGATGTTAGAAGCAATTCCAAGCCTATACAGTTTTTCATGAGGTTGTTTTACAACAACCCTGAACAAGATTGCATACTAGTCTTTGTGGTGAGGATTATTGATGATGTATGTCATTTCACACTGGTTGTCAGACTGGTGGATTAAGCACAAGTGTCAATAGGTAAGAGAATGGGGCTAGATAAATCGATCTCTG…	AAATATATTACAATCTATGATGCTTTTTTTCCATGAAGTTTTCTAGTAAAATTTTAAGATATCATTACAAATGTTACCATTTGTAATCCTGAGTAAAATCATATCAAAAACGTGGGATTCTGATCTTCAGATACAATTATGAGGCACAGAAAGCAGACAGATACAAAGGAGGACACTTGATACAATTAGATTAACAAACACAATTATGATGTTAGAAGCAATTCCAAGACTATACAGTTTTTCATGAGGTTGTTTTACAACAACCCTGAACAAGATTGCACTCTAGTCTTTGTGGTGGGATTATTGATGATGTATGTCATTTCACACTGGTTGTCAGACTGGTGAATTAAGCACAAGTGTCAATAGGTAAGAGAATGGGGCTAGATAAATCGATCTCTG…
chr12	15135493	15135494	128	13	B6xCAST	CAAATTACAGAAAGGAGCTCCATTAATAGGGTGATGCTGTAATTAATCTTTAGGGTACAAAAATGACAAGAGAGGTCTAAATTACACCAAATCCCAAACAAAACTTTAATGAGACCGAAAATTGTTGAAAGACATCTGAGGAGAAAACGAGTTTGACTAAAGGCTTAGCATAGTGTTTGCAAAAATGACTGAGCAGATTTAAATGAAAGCACTAAGAGCCCGGATCCCAGAAGGAGGATGGGCACTGTTGCTTTAAAGTCTTGTACTTGTACTGAAGTAAGAGATATTTGACAAACTGTGTAGAAACAATCTGGTCTGTAAATGATACCTAGTGGGAACTGGCAAAACAGTTACAGGAATTTAACGTTTTATTGGGAGAAATAAAATACCACTGATTTG…	ATTACAGAAAGGAGCTCCATTAATAGGGTGATGCTGTAATTAATCTTGAGGGTACAAAAATGACAAGAGAGGTCTAAATTACACCAAATCCCAAACAAAACTTCAATGAGACTGAAAATTGTTGAAAGACATCTGAGGAGAAAACAACGAGTTCGACTAAAGGCTTAGCGTAGTGTTTGCAAAAATGACTGAGCAGATTTAAATGAAAGCACTAAGAGCCCGGATCCCAGAAGGAGGATGGGCACTGTTGCTTTCAAATCTTGTACTTGTACTGAAGTAAGAGATATTTGACAAACTGTGTAGAAACAATCTGGTCTGTAAATGATACCTAGTGGGAACTGGCAAAACAGTTATAGGAATTTAACGTTTTATTGGGAGAAATAAAATACCACTGATTTG…
chr12	31826105	31826106	211	19	B6xCAST	TTCTAGCCCCCCTGTTGAGCCATCTTATCAGATTCCCTATGTAGTATAAAAGGTAGTGGTGCTATTGGTGGTGGGAGGTGTGTGTGGAGAGGGAGACAGAGACAGACAGACAGACAGACAGACAGAGATTTTGTTCATCTTTGTTTGCCTGTCTTACTTTCTTTACCCATTCCAGATCTCAGTACTGGCCATCCATCCATTCTGCTTTACCTCATTTTGTTCTCACTGAGTAACCAACCCTCTGAAGGCAGGACAGTGACCCATTCAGAAGCTCAGATTCTGAATCCTTTTCTTCCACGTTAGAGCTGGGTTCCCCTTGACCTTGAGCAGCTGCCTGGACTCTCCTCCTCTCCCTCGGCTGTGCATCCACTCTTGCTCAGTCTCCTCTCCCTCGGCTGT…	CCCCTGTTGAGCCATCTTATCAGATTCCCTATGTAGTATAAAAGGTAGTGGTGCTATTGGTGGTGGGAGGTGTGTGTGGAGAGGGAGACAGAGACAGACAGACAGACAGACAGACAGACAGACAGAGATTTTGTTCATCTTTGTTTGCCTGTCTTACTTTCTTTACCCATTCTAGATCTCAGTACTGGCCATCCATCCATTCTGCTTTACCTCATTTTGTTCTCACTGAGTAACCAACCCTCTGAAGGCAGGACAGTGTCCCATTCAGAAGCTCAGATTCTGAAGCCTTTTCTTCCACGTTAGAGCTGGGTTCCCCTTGACCTTGAGCAGCTGCCTGGACTTTCCTCCTCTCCCTCGGCTGTGCGTCCACTCTTGCTCAGTCTCCTCTCCCTCGGCTGT…
chr12	35000529	35000530	215.5	38	B6xCAST	TTCTTAAGAAATCTGAAGAGAAAAGTAAAATAAGAAAAGCCAAATGCTAAACTTGACTATATGTACAACATCTGATGAAGTCTCTGTAACCATAGCTTTAGTGGATGAAGAGAAATCAAACAGATGATTTCCATGGAGAGAGTAGAACAAACAAATGGTGTTAACTCATAGAAGAAGAAATAACGAGGCAAAATAAACTGAGTGGGGAAAGAATCAAACTTAAGTAACAGCAGTGTGTTAAAACATACTATTCGTTCTCACCAAGGCAGGAAAGGGAAATCAACATACAATGCTAGTTAAGAAGGGAAAAAACAGATTCTTAAGAGCTTGTTTGGAAGTTCTGATGCACCCTTGACCAAATAATGATCCTTTTCCATGAGAGGATGTGGAAATAATTCT…	TTCTTAAGAAATCTGAAGAGAAAAGTAAAATAAGAAAAGCCAAATGCTAAACTTGACTATATGTACAACATCTGATGAAGTCTCTGTAACCATAGCTTTAGTGGATGAAGAGAAATCAAACAGATGATTGCCATGGAGAGAGTAGAACAAACAAATGGTGTTAACTCATAGAAGAAGAAATAACGAGGCAAAATAAACTGAGTGGGGAAAGAATCAAACTTAAGTAACAGCAGTGTGTTAAAACATACTATTCGTTCTCACCAAGGCAGGAAAGGGAAATCAACATACAATGCTAGTTAAGAAGGGAAAAAACAGATTCTTAAGAGCTTGTTTGGAAGTTCTGATGCACCCTTGACCAAATAATGATCCTTTTCCACGAGAGGATGTGGAAATAATTCT…
chr12	57211789	57211790	701.5	91	B6xCAST	TTTTGCATTAGCAGAGAAATATTTGGCTTTGTAGTAGTAGAGAAACACTTGGCTTAGAGTTGGTGTGGACCAGAATGCTGATAGCAGTGGCATAAGATCATGGTGTCAGAAAGTGAGCTTGTCCCAGTGGGTCCAGGCCTGTGACACAAAGTCAGTGGGCAGGCTGTGAGAAGAGGCTGCGGGCACAGGCATGTATCCTCGATGAACTGGATTGTAAAGAGAGCAGGCTGGACCGCAGAGACAGGTGCGCAGGTATGTGCTGTTGAGGCACCAGGCTCGCATACCCTGGCTGGCTGGTGGCATGGGACACCTGCACAGTCTGAAAAGCACAGATCGCTAGGAGGCAAAATAGGTCAGATGGCACTCAAGAGAGACTGGCTGTCTCTGCCTTCATTTCGA…	TTTTGCATTAGCAGAGAAATATTTGGCTTTGTAGTAGTAGAGAAACACTTGACTTAGAGTTGGTGTGGACCAGAGAGCTGACAGCAGTGGCATAAGATCATGGTGACAGAAAGTGAGCTTGTCCCAGTGGGTCCAGGCCTGTGACACAAAGTCAGTGGGCAGGCTGTGAGAAGAGGCTGCGGGCACAGGCATGTATCCTTGATGAACTGGATTGTAAAGAGAGCAGGCTGGACCGTGGAGACAGGTGCGCGAGTATGTGCTGTTGAGGCACCAGGCTCGAATACCCTGGCTGGCTGGTGGCATGGGACACCTGCACAGTCTGAAAAGCACAGATCGCTAGGAGGCAAAATAGGTCAGATGGCATTCAAGAGAGACTGGCTGTCTCTGCCTTCATTTCGA…
chr12	72585714	72585715	128.5	18	B6xCAST	GTACACGGTTGTTGTCTTCAGACGTACCAGAAGAGGGCATCAGATCTCATTACAGATGGTTGTGAGCCACCATTTGGTTTCTGGGAACTGAACTCAGGATCTCTGAAAGAGTAGTCAGTGCTCTTAACCTCTGAGCCATCTCTCCAGTCCCCCCTTCATATAATTTTTAAGAGTTATCTTTGATAGCTTCCATTTAGGCTGATACTTTTCTCATCAGTAGGGCCTGCAGCAGCAGTACAGCCCCCAGACATCAGCATGACTTCAGGATGCAGCGTAGACCACAAACATCCGTGTGGGTTTTGGTGGTTAACACAGGCACAGACATCAACACAGACTCCAGACATGGACACAGACATGACCCTTGACTGCAACAGTGGAGCCTAGTGAGAAGTTTGGGGA…	GTACACGGTTGTTGTCTTCAGACGCACCAGAAGAGGGCATCAGATCTCACTACAGATGGTTGTGAGCCACCATTTGGTTTCTGGGAACTGAACTCAGGATCTCTGAAAGAGTAGTCAGTGCTCTTAACCTCTGAGCCATCTCTCCAGTCCCCCCTTCATACAATTTTTAAGAGTTCTCTTTGATAGCTTCCATTTAGGCTGATACTTTTCTCATCAGTAGGGCCTGCAGCAGCAGTACAGCCCCCAGACATCAGCATGATTTTAGGATGCAGCATAGACCACAGACATCCGTGTGGGTTTTGGTGGTTAACACAGGCACAGACATCAACACAGACCCCAGACATGGACACAGACATGACCCTTGACTGCAACAGTGGAGCCTAGTGAGAAGTTTGGGGA…
chr12	78928984	78928985	347.5	18	B6xCAST	CTCTCACCCAGGCCAGCCCTCAACTCTCTCCCCAGCACCTTACCAAAGGCCTCTTTGAGCCATCTTGGCACTGGGACTTGGGACAGAAAGCTATGGTCAGGAGACAAATGTTTTGTCTCCTTCATCCCTAGTCTGTTCCAGTCTCCCTCCTTTTCCAGTGCTTGTTAGCTGGTCAGCTTCTAGATGAGAGATAATGGCAGACTAGGCCTGGGCGGCAGGGGCTGGGAAGCTGTGGGTTAGGGCTGGAAGCAGGTTTCAGCTCCTGGATGGTTTGAGTTCATGACTTCCTTCTCTGAGAAGGATGGCCTCAAACTCACAAACCTCTTGCCTCAGCAGGACATTGAAAGAGGACATAAACCCCTTGTTTCTTTACAGGGTGAAGATTAGGGCTTATGAGTC…	CTCTCACCCAGGCCAGCCCTCAACTCTCTCCCCAGCACCTTACCAAAGGCCTCTTTGAGCCATCTTGGCACTGGGACTTGGGACAGAAAGCTATGGTCAGGAGACAAATGTTTTGTCTCCTTCATCCCTAGTCTGTTCCAGTCTCCCTCCTTTTCCAGTGCTTGTTAGCTGGTCAGCTTCTAGATGAGAGATAATGGCAGACTAGGCCTGGGCGGCAGGGGCTGGGAAGCTGTGGGTTAGGGCTGGAAGCAGGTTTCAGCTCCTGGATGGTTTGAGTTCATGACTTCCTTCTCTGAGAAGGATGGCCTCAAACTCACAAACCTCTTGCCTCAGCAGGACATTGAAAGAGGACATAAACCCCTTGTTTCTTTACAGGGTGAAGATTAGGGCTTATGAGTC…
chr12	98393621	98393622	198.5	25	B6xCAST	AAGGCTACAAGACTTAGGTACTGGGGGTTAAGTATCTGCTTCCACAGTTTCTGCCCCTTCTCTCCTGTGATTGCTCTCAGGTAATGTGAGAAGCCATTTCACTCACAGGGATGTGGCTTGCCTGTCCAGGACAGCATACCCTGATCCTTCTACAGGAAGTACGGGTATCACTTCCCCAAAGGACCACCAACTAATTTTCAAGAGACAGACTACCTGAGCGAGTCCTTAGCCTCCACTTTTACAAATCTTTAAGAAGTCGATTATAGCAATTAGCCATACGCATGTTACAAACTGTAAATCTTTCACCAGCAGATAGTAGTTCGTTAAACATTAAACTGTTTCTCCTAATACCAGAAACTATCAGAAGCAATCAAGAAATTAGGAGACTATGTGGAACTT…	AAGGCTACAAGACTTAGGTACTGGGGGTTAAGTATCTGCTTCCACAGTTTCTGCCCCTTCTCTCCTGTGATTGCTCTCAGGTAATGTGAGAAGCCATTTCACTCACAGGGATGTGGCTTGCCTGTCCAGGACAGCATACCCTGATCCTTCTACAGGAAGTAGGGGTATCACTTCCCCAAAGGACCACCAACTAATTTTCAAGAGACAGACTACCTGAGCAAGTCCTTAGCCTCCACTTTTACAAATCTTTAAGAAGTCGATTATAGCAATTAGCCATACGCATGTTACAAACTGTAAATCTTTCACCAGCAGATAGTAGTTCGTTAAACATTAAACTGTTTCTCCTAATACCAGAAACTATCAGAAGCAATCAAGAAATTAGGAGACTATGTGGAACTT…
chr12	105048657	105048658	127	12	B6xCAST	AGCAGGTTGAACTTGAGCATGAGAGGAGAGAGAGAGAATGATAGAGGAGGAGAAGGAGACCACCAAGGACAGGACCCCAAAATAGGGTTATAAGGAGAAATGGGGGGTGGCGGTTCCTGAGCTGGAGAAGTTGAGCTCAAATTGGGGAAGAGGCAAGACAAGCTGTGTATCCGTGATCCTGAGGGAGCCTGCTGGCCAGCACGCACATTGCTGTTCTAATGGGCATCCCAGAGAGCCATTTGTCCCTTCTGCCCGAGATAAGGGAGTGGGCACCTTTGTTAGAAGGGGTTTCATAAGCTCCTGAGGAATGCCGGCTTTTGTCCAACTGCGGAGTTTGGGGAGTGGAGTTTCCTTTGTCCTCTCATCCGGATGTCTCTCTGCCTACCGTGAGTCAGCAGC…	AGGTTGAACTTGGGCATGAGAGGAGAGAGAGAGAATGATAGAGGAGGAGAAGGAGACCACCAAGGACAGGACCCCAAAATAGGGTTATAAGGAGAAATGGGGGGTGGGTTCCTGAGCTGGAGAAGTTGAGCTCAAACTGGAGAAGAGGCAAGACAAGTTGGGTACCCATGATCCTGAGGGAGCCTGCTGGCCAGCACGCACATTGCTGTTCTAATGGGCATCCCAGAGAGCCATTTGTCCCTTCTGCCCCAGATAAGGGAGTGGGCACCTTTGTTAGAAGGGGTTTCATAAGCTCCCGAGGAATGCCGGCTTTTGTCCAACTGCGGGAGTTTGGGGAGTGGAGTTTCCTTTGTCCTCTCATCCGGATGTCTCTCTGCCTACCGTGAGTTAGCAGCCTGA…
chr12	105476698	105476699	264.5	13	B6xCAST	ATCAATTGCTCATAAGCCATGTGTTCTCAGGAAAGGGACCGTGCCTCTCTGAGTCCCAGAATGGGACTTCTTCTGTGGGGCTGTTGTGAAACCACAATACAGGGCCCAGGTGCAGAGTAGCTCTTCTTAGGAGACCCTGCTTGCTCCGTCTGAGCTCCTGAGACAGTCAGGGAAGCCTCTGGAGGGTCATGAGTATGGACAGGGTTATGGGCAGTGGTGGGGCAGATGAGCGAGCAGCAAAGAACATGGAGATCCCTGGCTTAGCGGGTTCAGGGAGAGAAGACAGCAGAGTGCCCTATGCAGAAGCTAGGACCTGAGCTCGTCTGTCTAGGACCCAGGCCTACGATCTCCAGGCTCTGATGGGACCCCGTGACAGTCACTAATAGCTGGAGAGTCAGG…	ATCGATTGCTCATAAGCCATGTGTTCTCAGGAAAGGGACCGTGCCTCTCTGAGTCCCAGAATGGGACTTCTTCTGTGGGGCTGTTGTGAAACCACAATACAGGGCCCAGGTGCAGAGTAGCTCTTCTTAGGAAACCCTGCTTGCTCCGTCTGAGCTCCTGAGACAGTCAGGGAAGCCTCTGGAGGGTCATGAGTATGGACAGGGTTATGGGCAGTGGTGGGGCAGATGAGCGAGCAGCAAAGAACATGGAGATCCCTGGCTTAGCGGGTTCAGGAAGAGAAGACAGCAGAGTGCCCTATGCAGAAGCTAGGACCTGAGCTCGTCTGTCTAGGACCCAGGCCTACGATCTCCAGGCTCTGATGGGACCCCGTGACAGTCACTAATAGCTTGAGAATCAGG…
chr12	108395107	108395108	1526.5	251.5	B6xCAST	CTTGCAAGTCACTTTCTCAAACCCCTACCAGAGTCTGAACTCCAAGAACACACAGGCAATGGCCATCCACGTTAGATACTTGTAGGCCCGTGCCCACGTGAGTGTGCAGGAAGATACTCACACACCCATCTTAGCTGCAGGATTTTCAGGGCCCTGTGTGAAGTGGGCATGTGCAGAATGCCACAGGATTGCACAACAGTGATTCTGAACCATCTAACCAGCTAGGGCCCGGGGCCCAGCACACACACCGCCACAAGACCACACCCGTGCATATATCCCGAATCCTCACAGACGAATGTCCCCACAGGACAGACACCCATGAACACACACTCATGTGCCTATACACTGAGAATTCTCACACATGTTCAGAGGCAATGAGGCTTTTAAAATATTCCTTCA…	CTTGCAAGTCACTTTCTCAAACCCCTACCAGAGTCTGAACTCCAAGAACACACAGGCAATGGCCATCCACGTTAGATACTTGTAGGCCCGTGCCCACGTGAGTGTGCAGGAAGATACTCACACACCCATCTTAGCTGCAGGATTTTCAGGGCCCTGTGTGAAGTGGGCATGTGCAGAATGCCACAGGATTGCACAACAGTGATTCTGAACCATCTAACCAGCTAGGGCCCGGGGCCCAGCACACACATGGCCACAAAACCACACCCGTGCATATATCCCGAATCCTCACAGACGAATGTCCCCACAGGACAGACACCCATGAACACACACTTATATGCGTATACACTGAAAATTCTCACACATGTTCAGAGGCAATGAGGCTTTTAAAATATTCCTTCA…
chr12	108674683	108674684	871.5	115	B6xCAST	GAAACCCTGTCTCGAAAAACCAAAAAAAAAAAAAAAAAAAAAAAAAAAGAAAAGAAAAGAGAAGAAAAGTGGGTGGTGCCTATGACAACACTCAGGGTAATTCTTTTTCCTCCACACAAACAAAGCCCAGTGTTATGGGTATGAGAAGTACCACAGCAGCAGCTTTTAAATGTGGGAGCGTGGTCACAGAGAGCTCAAGGTGTCTGCTGTGATTGCTTTCCAGACAAGTAATGGAGCAGCAGCACCGCCAGGAGTCTCTGGAGAGGAGAATCTCGGCCACAGGTAGGGGAGACTCCCTCCTCCAGCCCTGTCCGAGGCCCTGACCCCCCAGTGCATCCTCATGGCAAACCATCTTACCTGCTTTTCCAACACCCTGTCCTCTCAGCTGCTGCAGCACCT…	AGAAACCCTGTCTCGAAAAACCAAAAAAAAAAAAAAAAAAAAAAAAAAAGAAAAGAAAAGAGAAGAAAGTGGGTGGTGCCTATGACAGCACTCAGGGTAATCCTTTTTCCTCCACACAAACAAAGCCCAGTGTTATGGGTATGAGAAGTACCACAGCAGCAGCTTTTAAATGTGGGAGCGTGGGCACAGAGAGCTCAAGGTGTCTGCTGTGATTGCTTTCCAGACAAGTAATGGAGCAGCAGCACCGCCAGGAGTCTCTGGAGAGGAGAATCTCGGCCACAGGTAGGGGAGACTCCCTCCTCCAGCCCTGTCCGAGGCCCTGACCCCCCAGTGCATCCTCATGGCAAACCACCTTACCTGCTTTTCCAACACCCTGTCCTCTCAGCTGCTGCAGCACCT…
chr12	108687088	108687089	117.5	21.5	B6xCAST	TGTGGCTTCTGTGTCTGAGACCTCCCTCTCCTCAGCATCCTCTCAGATCACGTGTGCAGGAGAGGGTGGGTGTGGAAACACCCCCTAGTTTCTGTCCTTTCCTGTTCACATCTGTTGCCTGCCCAGCCCTGCCACTGCTGCCTCTGGAGGGCGATGAGCTTCCTTACAGCCTGCATGATCCTGTGTATGAGGAGACATGGTGTTCTCTCCTTCCCAGAAGAGCTCTGGGAAACTAAAAACTGAGACTGTGACCCTTGTGTCACACCTGACCCCACCAGGGCCTTTGAGGGATGACTTGGGCTGGAACAGAGCAGCAAATCATAGCCTGCGCCTGCACCTACGCCTGCTGCCCACGTGCTGCCTCGCTTCTCACTGGTTCCCAGGCCAGCAGCAGTGATT…	TGTGGCTTCTGTGTCTGAGACCTCCCTCTCCTCAGCATCCTCTCAGATCACGTGTGCAGGAGAGGGTGGGTGTGGAAACACCCCCTAGTTTCTGTCCTTTCCTGTTCACATCTGTTGCCTGCCCAGCCCTGCCAATGCTGCCTCAGGAGGGCGATGAGCTTCCTTACAGCCTGCATGATCCTGTGTATGAGCAGACATGGTGTTCTCTCCTTCCCAGAAGAGCTCTGGGAAACTAAAAACTGAGACTGTGACCCTTGTGTCGCACCTGACCCCACCAGGGCCTTTGAGGGATGACTTGGGCTGGAACAGAGCAGCAAATCATAGCCTGCGTCTGCACCTATGCCTGCTGCCCACGTGCTGCCTCGCTTCTCACTGGTTCCCAGGCCAGCAGCAGTGATT…
chr12	112025106	112025107	205.5	38.5	B6xCAST	GTGAACAGCTAAGTGGTTTAGCATCGTTTCTGTACTGGAATTCTGCTCTTTCAGCGCTGTCCGCTGGGAAGCACAATATTGAAGGTGAAGTTGCTTGACATGGGTGAACCGAGAGCTCTGCTGGCCACCGCCCTGTCTCCGCCCAGCCTGAGTGACATCGAGCGCACCATTCTTCTGTTAAAGGAGGTGGGACACGTGCAATTACTTAGTAGTGGGGAAAGCTAAGGCTTTAGCTTTGTGGGGGAGCCCAACTTTCCTAGTCTGTAAAGTGGTTTAGCTGTTGCAAAGCTCAGCATGGGACTCCAGTCCCAGCCAGCCCTTCAGCTCGGCCTGGGCCCCTCCCCTGCGTCTCCATCCCTATGGCCCCATCCTGAGAAGCATCCAGCGCTTGCTTCAGTC…	TGTGAACAGCTAAGTGGTTTAGCATCGTTTCTGTACTGGAATTCTGCTCTTTCAGCGCTGTCCGCTGGGAAGCACAATATTGAAGGTGAAGTTGCTTGACATGGGTGAACCGAGAGCTCTGCTGGCCACCGCCCTGTCTCCGCCCAGCCTGAGTGACATTGAGCGCACCATTCTTCTGTTAAAGGAGGTGGGACACGGCAATTACTTAGTAGTGGGGAAAGCTAAGGCTTTAGCTTTGTGGGGGAGCCTAACTTTCCTAGTCTATAAAGTGGTTTAGCTGTTGCAAAGCTCAGCATGGGACTCCAGTCCCAGCCAGCCCTTCAGCTTGGCCTGGGCCCCTCCCCTGCGTCTCCATCCCTATGGCCCCATCCTGAGAAGCATCCAGCGCTTGCTTCAGTC…
chr12	113059482	113059483	152.5	22	B6xCAST	GCTGGAGAAGGAGCTGAAAGTTCTGCAGGAGCCTGGGTCTGCATTGGGTGGAGCTTGAGCATAGGAGACCTCAAAACCTGTCCCCACAGTGACACAGTTCCTCCAACAAGGCCACACTTCCTGATAGTGCCACTCCCTGTGGGCCGAGCATTCAAACACATGAGTTTATGAAGGCCACACCTTTTCAAACCACAAGGGGCATCCACTGCTGACAACCACTTACTGTGTGGTGTTGACTGCCTACCTGGGGTGAGCAACACAAGCAGATGGTGTTTTCTTCTTGTTTTAAATTACATTTTATTGTGGGAGGTGGCACGTGTGTGGCACAGAACAAGAATGAAGGTCAGAGGACAAATTGCTAGGATTACTTCTCCCCTCCCCACTGCGTGGGTCCCAAGG…	GCTGGAGAAGGAGCTGAAAGTTCTGCAGGAGCCTGGGTCTGCATTGGGTGGAGCTTGAGCATAGGAGACCTCAAAACCTGTCCCCACAGTGACACACTTCCTCCAACAAGGCCACACTTCCTGATAGTGCCACTCCCTGTGGGCCAAGCATTCAAACACATGAGTTTATGAAGGCCACACCTTTTCAAACCACAAGGGGCATCCACTGCTGACAACCACTCACTGTGTGGTGTTGACTGCCTACCTGGGGTGAGCAACACAAGCAGATGGTGTTTTCTTCTTGTTTTAAATTACATTTTAATGTGGGAGGTGGCACGTGTGTGCCACAGCACAAGAATGAAGGTCAGAGGACAAATTGCTAGGATTACTTCTCCCCTCCCCACTGCGTGGGTCCCAAGG…
chr12	117127630	117127631	107.5	16.5	B6xCAST	TTGTTGGTACTCAGTAGAGTGGGGTCAATAGTCCCTGGGGGCCTCAGTGGTGGACACTCTGGAGGCCCCAGTGCATCTTGAACACTGAGCTGCCTGCGACGTCATAGGTTCCACTTTCATAGGGCCACTCTTCACAGCAGGCTAGAGCAGCAGATGCTGAACAAGGTTTGTTCACACCCACACCATGAAAGGTGGGAATGGGAACAAATCTGGGGTCCAATACCAGGTCCTAGTTTGGATGGCCTCTGAAGGCTAACCTGTTGGCCCTTATTCTTCATTCATGGGGGTATGATCTCATGGCCTAGGACTTCAGCCATGGAGACAGCTTACATTATCATTTCAAAGCCCAGAGAAAGGGCATTGTTCCAGGAATAAGTATAGCCTATAATATCTTAGTAA…	TTGTTGGTACTCAGTAGAGTGGGGTCAATAGTCCCTGGGGGCCTCAGTGGTGGACACTCTGGAGGCCCCAGTGCATCTTGAACACTGAGCTGCCTGCGACGTCATAGGTTCCACTTTCATAGGGCCACTCTTCACAGCAGGCTAAAGCAGCAGATGCTGAACAAGGTTTGTTCACACCCACACCATGAAAGGTGGGAATGGGAACAAATCTGGGGTCCAATACCAGGTCCTAGTTTGGATGGCCTCTGAAGGCTAACCTGTTGGCCCTTATTCTTCATTCATGGGGGTATGATCTCATGGCCTAGGGCTTCAGCCATGGAGATAGCTTACATTATCATTTCAAAGCCCAGAGAAAGGGCATTGTTCCAGGAATAAGTATAGCCTATAATATCTTAGTAA…
chr13	4228582	4228583	123	8	B6xCAST	TTCTCCAAGTGCAAGTTTTCTGGGGGGAATTTTAACTTCTTGAGATCCACTGATTTTTTTATATTTTGATAGTTACTACAGAGGGACAAAGCAAATCTATAAAATATCATAGTCCATGGGAGGCCTGGAGTGGTAGCTCATTGCTTTTAGGATTTGTGTAATCAAGTAGACACTTCATCATGGAAAAAGGCTTTGAAAATTAAACCCACATAAAATTTATGGAGGAGGGACTGGTCAATGCCTATACCCATGAATAGAACATAAATAATAGTTGGTAGTTTTTGGGTCAGCCTAAACAGGCATGCCCAGGGAAGCAAGAACAGTGAATTTATTTTATTTTATGTGTGATTAAAATCCTATACATATTCTTGAACTTTTGACAACTCCTTTAGAGAAAAA…	CTCCAAGTGCAAGTTTTCTGGGGGGAATTTTAACTTCTTGAGATCCACTGATTTTTTTTATATTCTGATAGTTACTACAGAGGGACAAAGCAAATCTATAAAATATCATAGTCCATGGGAGGCCTGGAGTGGTAGCTCATTGCTTTTAGGATTTGTGTAATCAAGTAGACACTTCATCATGGCAAAAGGCTTTGAAAATTAAACCCACATAAAATTTATGGAGGAGGGACTGGTCCATGCCTATACCCATGAATAGAACATAAATAATAGTTGGTAGTTTTGGGGTCAGCCTAAACAGGCATGCCCAGGGAAGCAAGAACAGTGAATTTATTTTATTTTATGTGTGATTAAAATCCTATACATATTCTTGAACTTTTGACAACTCCTTTAGAGAAAAAA…
chr13	23969433	23969434	510.5	74	B6xCAST	TGTCAACTGTGGACCTGCTGGATTTGAGATGCTGGGTGTGAAAGTGGACACACATACCCACAGTGTGCTCATCTGAGAAGCTCAAAAGAATGGTTTGAGTCAGAGACAGAAGCGGGGGCTTTCAGGCATTCTCTTGCATTTAAAACTGGTTAGCATCATCAGCATGTGGAGAGCAGACATAGAAAGAGAAAATATCCCACATATGAGTCCAGCCAGGCCTTGGACTGGACGGACTTCATACCAGTCATAAGGCCAGCTTAACTCCATAGAGTTTTCTCTGCCCAAGTGTTGGAATTTCAGTTGCTGTTTTATCCTAGTGACTCCCAGAGTCATTAGCTTCTACTTAACGAGATTAAATACCACCTAATGATATCGTATCTAGATACACAGTCTCTCCTC…	TGTCAACTGTGGACCTGCTGGATTTGAGATGCTGGGTGTGAAAGTGGACACACATACCCACAGTGTGCTCATCTGAGAAGCTCAAAAGAATGGTTTGAGTCAGAGAAAGAAGCGGGGGCTTTCAGGCATTCTCTTGCATTTAAAACTGGTTAGCATCATCAGCATGTGGAGAGCAGACATAGAAAGAGAAAATATCCCACATATGAGTCCAGCCAGGCCTTGGACTGTACGGACTTCATACCAGTCATAAGGCCAGCTTAACTCCATAGAGTTTTCTCTGCCCAAGTGTTGGAATTTCAGTTGCTGTTTTATCCTAGTGACTCCCAGAGTCATTAGCTTCTACTTAACGAGATTAAATACCACCTAATGATATCGTATCTAGATACACAGTCTCTCCTC…
chr13	43967582	43967583	573	73	B6xCAST	CTTTAAACTAAATAGTATTACCTGAAGGATTTAGCAATAAAAAGACATACTGCTTGCAACTAAATCTGTAATAGTTCAGCCGGATAGAGTGGTTCACATCTGTAATCCAGACCCGTGGGAGGTTAAGGCAGATGGATTGCTGTGAGTTCAAAACCACATTCACTACATAGAGAGCTCCAGGACAACCCGGACCACAGAGGGAGACCCTGTGTGAAAAACATATATTAGATCTAATTTGAAATGATATGTATAATCAGAGAAAATAAGAAGATGCATTGGTAGAATATTAACAGATGGGGATTCTGGGTGAGGTCATTATGGGAATTTTCATTCTAGTTCAACTTTTCCCTGGGTCTGCAATTATTTAAAAATGAAAAAAAAAATGCCATTCATAATCCT…	TCTTTAAACTAAATAGTATTACCTGAAGGATTTAGCAATAAAAAGACATACTGCTTGCAACTAAATCTGTAATAGTTCAGCCGGATAGAGTGGTTCACATCTGTAATCCAGACCCGTGGGAGGTTAAGGCAGATGGATTGCTGTGAGTTCAAAACCACATTCACTACATAGAGAGCTCCAGGACAACCCGGACCACAGAGGGAGACCCTGTGTGAAAAACATATATTAGATCTAATTTGAAATGATATGTATAATCAGAGAAAATAAGAAGATGCATTGGTAGAATATTAACAGATGGGGATTCTGGGTGAGGTCATTATGGGAATTTTCATTCTAGTTCAACTTTTCCCTGGGTCTGCGATTATTTAAAAATGAAAAAAAAATGTCATTCATAATCCT…
chr13	56168019	56168020	130.5	6	B6xCAST	TGAGGACAGCTACAGTGTACTCATATAAATAAAAATAAATAAGTCTTTTTTAAAAAGGAAAGGAAAGAAAGGTATGTTCTCCTGCCCCTAGAGCTTTTGTAGGTATGGCTGCAGTATCACATGCGTGCCAGTAGGTGGCAGAGAGGAGGGAGGCTGTGTCTAAGCTCAGTGTTCTGATCTATGAACATCTGAAGCCTAACATTCCCTGAAGAAAGAGAGGGAGGGAGGGAGGGAGGGAGAGAGAGAGAGAGAGAGAGAGAGAGAGAGAGAGAGAGAGAGAGAGAGGGAGAGAGAGAGGGAGAGAGAGAGAATGAGAGAGAAAGGCACATACTTCTCTGAGTCTCTTCCCTGTCATTCAATAATGTCACCTTGTAATGGGGCTCTCAAAACGGACTACAG…	TGAGGACAGCTACAGTGTACTCATATAAATAAAAATAAATAAGTCTTTTTTAAAAAGGAAAGGAAAGAAAGGTATGTTCTCCTGCCCCTAGAGCTTTTGTAGGTATGGCTGCAGTATCACATGCGTGCCAGTAGGTGGCAGAGAGGAGGGAGGCTGTGTCTAAGCTCAGTGTTCTGATCTATGAACATCTGAAGCCTAACATTCCCTGAAGAAAGAGAGGGAGGGAGGGAGGGAGGGAGAGAGAGAGAGAGAGAGAGAGAGAGAGAGAGAGAGAGAGAGAGAGAGGGAGAGAGAGAGGGAGAGAGAGAGAATGAGAGAGAAAGGCACATACTTCTCTGAGTCTCTTCCCTGTCATTCAATAATGTCACCTTGTAATGGGGCTCTCAAAACGGACTACAG…
chr13	58192309	58192310	304.5	8	B6xCAST	TAGTGGTGCTGCCAGTGGTACCGGAGGCTGGTGAGCTCTGGGAAGTCTGCGGAGCCCACGGGTTGGGGAGCGGATCCCTATTTTCTGTTCGAGAAGGCTGAGTCCCTTCTGCTGAGGACGAACTGCTCACTAAGGACGCAAATGGATTACCACCAAACTGTAATAAAAAGAAAAAAAATCAATTATAGAATGATTTTTTCAGTACAGCCACATTCTGCACATAGCAGTACCCTTAGTCACAGACTGAGCCTGGGCACGAGTGCTCACCTGTTCTTGCGCAGCATTCAGCATAGGCTCCTGGATATCGGTGTACATGCGCCGTAAGGCATTATAGCCCCCAGGAATACTTTCTAGGTTGCTCAAGGCTCGGTCCTGGTTTCTCATCATTTCCTGCATCAT…	AGTGGTGCTGCCAGTGGTACCGGAGGCTGGTGAGCTCTGGGAAGTCTGCGGAGCCCACGGGTTGGGGAGCGGATCCCTATTTTCTGTTCGAGAAGGCTGAGTCCCTTCTGCTGAGGACGAACTGCTCACTAAGGACGCAAATGGATTACCACCAAACTGTAATAAAAAGAAAAAAAATCAATTACAGAATGATTTTTTTCAGTACAGCCACATTCTGCACATAGCAGTACCCTTAGTCACAGACTGAGCCTGGGCACGAGTGCTCACCTGTTCTTGAGCAGCATTCAGCATAGGCTCCTGGATATCGGTGTACATGCGCCGTAAGGCATTATAGCCCCCAGGAATACTTTCTAGGTTGCTCAAGGCTCGGTCCTGGTTTCTCATCATTTCCTGCATCAT…
chr13	72707726	72707727	90.5	17	B6xCAST	TGGCCAAGTAGGAGATGTTTATTTGGGAAGAGAGAGGATCAGCCAGAGTGGGAAGGAGATAAAGGAGAACAGGAGGAGAGGAGAGTATGATCAAAACACATGGTCTACATGTATGAAGACATCATTATGCAATTGATATATGCTTTTCAAAAGCTAAGTCTGAATAATATTTTGAAAAACCGTGTTTTTCCTCAGTTCCCAACTTAAAAGCTGCAGCAGTACATTCTTGCTCTCCACCCCTTATCCATTAACACTGAAGTCAGAGTATGTAACTAGAATGTAACTGTATGCCATGGTCTTCCTCTCTAGGTGGCTCAGAAGTGGCTCCAATGCTCCGTTCATGTTCCAGCCTTGGAAAGCTCAAGCCATGGATTTTCTTTGCATGTGGGAATGGGACTG…	TGGCCAAGTAGGAGATGTTTATTTGGGAAGAGAGAGGATCAGCCAGAGTGGGAAGGAGATAAAGGAGAACAGGAGGAGAGGAGAGTATGATCAAAACACATGATCTACATGTATGAAGACATCATCATGCAATTGATATATGCTTTTCAAAAGCTAAGTCTGAATAATATTTTGAAAAACCGTGTTTCTCCTCAGTTCCCAACTTAAAAGCTGCGGCAATACATTCTTGCTCTCCACCCCTTATCCATTAACACCGAAGTCAGAGTATGTAACTAGAATGTAACTGTATGCCATGGTCTTCCTCTCTAGGTGGCTCAGAAGTGGCTCCAATGCTCCGTTCATGTTCCAGCCTTGGAAAGCTCAAGCCATGGATTTTCTTTGCATGTGGGAATGGGACTG…
chr13	85530996	85530997	231	31.5	B6xCAST	ACATGTGTTTGTTATGGATAGCCCTGGGGTTAATTATATTTGATGTTAATTCTGTTCTCCTGTGAGTGGTTATGAACAAGGAGTCAGCACTCAGATTTCCTGTAAATCTGCTTCCCACCATAACTTGTAAAATAAAAGAGAGCTGATGATTGGACAGATAGAAAGGAAGGTGGAGCAGAAGGTCAGAGAGAGAAGAAGGAGAAAATGGAAGAGGGAGAGGACACAGAGGAGGAGGAAGAAGAAGAAAAGCAGAGTAGAAGGACATGGCCTGGAGAAACCACAAGTTCTAAGAGGTCTCATAAGATGTGGAAGATTGTAGAGTATCAGTAGATTTGTCCAATATAGCCTCACAGCATATATTCATATTAATTGAGTTGTGTTTTCATTGCTGGGCATATT…	ACATGTGTTTGTTATGGATAGCCCTGGGGTTAATTATATTTGATGTTAATTCTGTTCTCCTGTGAGTGGTTGCGAACAAGGAGTCAGCACTCAGATTTCCTGTAAACCTGCTTCCCACCTTAACTTGTAAAATAAAAGAGAGCTGATGATTGGACAGATAGAAAGGAAGGTGGAGCAGAAGGTCAGAGAGAGAAGGAGGAGAAAATGGAAGAGGGAGAGGACACAGTGGAGGAGGAAGAAGAAGAAAAGCAGAGTAGAAGCACATGGCCTGGAGAAACCACAAGTTCTAAGAGGTCTCATAAGATGTGGAAGATGGTAGAGTATCGGTAGGTTTGTCCAATATAGCCTCACAGCATATATTCATATTAATTGAATTGTGTTTTCATTGCTGGGCATATT…
chr13	94161843	94161844	231.5	15.5	B6xCAST	AGCTATTAGCCCAGAGGTTGGGCTATGGGCTGTTCTACTGTTATTCGAAAGAGTGAAAGTTAGAATTAGGCCATGGCTCTTGGGCAGTTTCTGTGTAGCACCCTGCACTTTATCAGCTCGGCTTTCTGGGTGTGACCAGTACTGCTCTTTTCAACCTTAGCATGTCTCATAACCTGCCTTTATGAGCCCTTTGCTCCAGGAGAGCCTGTGTCCCTTGGAAAAGGTGGTCAGAAGTAGTTATGAGCTTGACATAAGTTGAAAGTAGGGGGTGGGGTCCCACCAAATCATTCCCTTCACTGAGGGAGTAGTACAAGGTCACATGCCAGTTAGTCAGGAGCCTAGGACTGGACTCTCGTCTTCCTGGATTCCTGCTTAGTCCTCTCCTCCAATTATTTTGCC…	AGCTATTAGCCCAGAGGTTGGGCTATGGGCTGTTCTACTGTTATTCGAAAGAGTGAAAGTTAGAATTAGGCCATGGCTCTTGGGCAGTTTCTGTGTAGCACCCTGCACTTTATCAGCTCGGCTTTCTGGGTGTGACCAGTACTGCTCTTTTTAACCTTAGCATGTCTCATAACCTGCCTTTATGAGCCCTTTGCTCCAGGAGAGCCTGTGTCCCTTGGAAAAGGTGGTCAGAAGTAGTTATGAGCTTGACATAAGTTGAAAGTAGGGGGTGGGGTCCCACCAAATCATTCCCTTCACTGAGGGAGTAGTACAAGGTCACATGCCAGTTAGTCAGGAGCCTAGGACTGGACTCTCGTCTTCCTGGATTCCTGCTTAGTCCTCTCCTCCAATTATTTTGCC…
chr13	98039130	98039131	457	51.5	B6xCAST	AGAAACACTCAGGTATGGAGACCAGTCCACTGTTTCTCCACAAACTACACTCAACAAGAACAACACTCAAGCAAGAATCCACTCACTTCCAGTCACTGCGACACACATGGCATGCCCTGGTATCCATAATATATACTTATACCACCACCTACACTTTGCTATAGGCTGCAGCTACTTAACCTACACTTAGAACCAGGCATCAGGCAGGCCCTAGGCAGGACTATAGGAGATACCAAGCAAGGTGCCCCGCCTTCACTTCCCTCCACCCTCCTGCGCCATCACCAGAAAGGCAAACAGGGCTGAGTAGCTTTCATAATGCTGAAAAGCCAGTTCATGGCAGAGCTGAGTTCTGAGCTGTCTGCTTGCTGCCTGGCAGCCAGACGAGTCTGAGCATGTAAG…	ACTTACTAGAAACACTCAGGTATGGAGACCAGTCCACTGTTTCTCCACAAACTACATGAACAACACTCAAGCAAGAATCCACTCACTTCCAGTCACTGCGACACACATGGCATGCCCTGGTATCCATAATATATACTTATACCACCACCTACACTTTGCTATAGGCTGCAGCTACTTAACCTACACTTAGAACCAGGCATCAGGCAGGCCCTAGGCAGGACTATAGGAGATACCAAGCAAGGTGCCCCGCCTTCACTTCCCTCCACCCTCCTGCGCCATCACCAGAAAGGCAAACAGGGCTGAGTAGCTTTCATAGTGCTGAAAAGCCAGTTCATGGCAGAGCTGAGTTCTGAGCTGTCTGCTTGCTGCCTGGCAGCCAGACGAGTCTGAGCATGTAAG…
chr13	98550721	98550722	374.5	23.5	B6xCAST	TGCACACCTAATATTAACTTAAGGGTCATCTTGCAAATGCTCAAAGTGGAGGGTGGTAACACCAAAATGCCACCAGCTGAACCTCAATAAGTCAATTCTTAACAACATGGAGCACAGCCCATCATCTGCAGAAAGCTTCACCACCATGGCTGGGCTGGAGGGTCACAGCTGTACATGAGCTCCTATCATCTCTCCATGTTCCTGCTCTAACCACGCTGTAGTAATGCATTTTATGTGCCTCCATGGGTCAGTGGTGGCATAAAATAGTGTTTATTTGCTTCTACTTTGTGGTAGCAGAATAAAACCCATCGGGACCATGCTTGTCAGCCCCCGGCACAGCCGCCATGACATTTCCTGTATCACATTATCAAGTATCTCTGTGGAAAATGGACTTTTATT…	TGCACACCTAATATTAACTTAAGGGTCATCTTGCAAATGCTCAAAGTGGAGGGTGGTAACACCAAAATGTCACCAGCTGAACCTCAATAAGTCAATTCTTAACAACATGGAGCACAGCCCATCATCTGCAGAAAGCTTCACCACCATGGCTGGGCTGGAGGGTCACAGCTGTACGTGAGCTCCTATCATCTCTCCATGTTCCTGCTCTAACCACGCTGTAGTAATGCATTTTATGTGCCTCCATGGGTCAGTGGTGGCATAAAATAGTGTTTATTTGCTTCTACTTTGTGGTAGCAGAATAAAACCCATCGGGACCATGCTTGTCAGCCCCCGGCACAACCGCCATGACATTTCCTGTATCACATTATCAAGCATCTCTGTGGAAAATGGACTTTTATT…
chr13	98551906	98551907	304	35	B6xCAST	GTAGGCAGTGGGCACTCAGAATGCCCAGACAGTGCAATGGGCACTTGGGTAGCATAGGGAGATCCCTGAGTGGTAGAAGACAGGCCAGAGTTACGCCCCATGAGTATGAGACCAAAATGTCAACCTATAGGTCATGCCATTGCCATGAGGCACAGAGTGCAAAACATGACACAACCAATAAAGGAGATGCCAAGTGGGACCACTCACCTCCTCTGGGTCTGCCTCAGATTTTCCAATGTGTTCTCGCCAGTGCTTGGTAAGCCTCCTGCTATTTCTCCTCATTTTCTCTTCTTAAGCCAGATCAGTGGCTAATGCCATTAACTCCGTTTCACAGAAAGCAAAACCGAAAAGCAGGGCCTGTGTAAGAGGAGCAGGCAGCGACTCCCGAGGCTCTTTCAA…	GTAGGCAGTGGGCACTCAGAATGCCCAGGCAGTGCAATGGGCACTTGGGTAGCATAGGGAGATCCCTGAGTGGTAGAAGACAGGCCAGAGTTACGCTCCATGAGTATGAGACCAAAATGTCAATCTATAGGTTGGGCCATTGCCACGAGGCACAGAGTGCAAAACATGACACAACCAATAAAGGAGATGCCAAGTGGGACCACTCACCTCCTCCGGGTCTGCCTCAGATTTTCCAATGTGTTCTCGCCAGTGCTTGGTAAGCCTCCTGCTATTTCTCCTCATTTTCTCTTCTTAAGCCAGATCAGTGGCTAATGCCATTAACTCCGTTTCACAGAAAGCAAAACCGAAAAGCAGGGCCTGTGTAAGAGGAGCAGGCAGCGACTCCCGAGGCTCTTTCAA…
chr13	98586583	98586584	138.5	16	B6xCAST	GCGCTTCCACAAGCCCGGCCCCTCACATCTGCACACCAGCTTCTTGGGAACAGAACGGAGACATGTGCATTTTAACATATTCCAACAGCAGCGTCTTGGGGGAGTGGGGGTGGGGATGTACCTTTTACCATATATGGTCATCATGCAATTCTCTCCAAGAACTCAATGCAGATATTTATATAATAATATTACCATTCCTTACCCCCACCTCCAGGCTGGCAGAGGTTGAAGGAAACACTTTTGGGAGGTCTCTACCACAACTGTATGAATGGTGTTGATTGGTTCTGATTTTTTTTTTTTTGAGCATGCATCAGACTATCAGCTTGTGAGGTATGTCAGAGTATTTTTTTAAAATCTTTCTAAAAATATGAATGGATATAACAATTTGAAGTTATTACA…	CAGCGCTTCCACAAGCCCGGCCCCTCACATCTGCACACCAGCTTCTCGGGAACAGAACGGAGACATATGCATTTTAACATATTCCAATAGCAGCATCTTGGGGGAGTGGGGGTGGGGATGTACCTTTTACCATATATGGTCATCATGCAATTCTCTCCAAGAACTCAGTGCAGATATTTATATAATAATATTACCATTCCTTACCCCCACCTCCAGGCTGGCAGAGGTTGAAGGAAACACTTTTGGAGGTCTCTACCACAACTGTATGAATGGTGTTGATTGGTTCTGATTTTTTTTTTTTTGAGCATGGATCAGACTATCAGCTTGTGAGGTATGTCAGAGTATTTTTTAAAATCTTTCTAAAAATATGAATGGATATAACAATTTGAAGTTATTACA…
chr13	98623394	98623395	527.5	94	B6xCAST	CCCACTTTATTTCAGATCTGTTGCATGGCATGATTACTAAGGGGCACACCTTGGCATGGGACCACCAGGTACTCCCTCACTATATTATATTTCAGAACAGAACAGATTTATTGTATACTATTTCTTAAATCACATTTTAAAAAAAATCACCACCGAACTTCAAAGGTCTACTCTGGGGATACTGCCAAGCTGAAGGCAAATGCGACCTCTTGACGTTCTTGTTTTCGTGTGAAAGGCACAGCTAAGATAGTCACAAACACTGTCAGGTATTTCAGTTGAAGTGGCAGATTCATTGCACACAGTGTCTCCAGACACAAGTCAGAGTCACTCGGAGCTGCCTATTCAATCTTGGTATTTTTTATTTTTAAAACTAGCTTTTACCACACAGACCAGACTGGA…	GGTTACCCACTTTATTTCAGATCTGTTGCATGGCATGATTACTAAGGGGCACACCTTGGCATGGGACCACCAGGTACTCCCTTACTATATTATATTTCAGAACAGAACAGATTTCATTGTATACTATTTCTTAAATCACATTTTAAAAAAAATCACCATTGAACTTCAAAGGTCTACTCTGGGGATGCTGCCAAGGCAAACACGACCTCTTGACGTTCTTGTTTTCGTGTGAAAGGCAGAGCTAAGATAGTCACAAACACTGTCAGGTATTTCAGTTGAAGTGGCAGATTCATTGCGCACAGTGTCTCCAGACACAAGTCGGAGTCACTCGGAGCTGCCTATTCAATCTTGGTATTTTTTATTTTTAAAACTAGCTTTTACCACACAGACCAGACTGGA…
chr14	29202492	29202493	101	11	B6xCAST	TTACTGACTTCAAAAGACAAAGAGACTCTAAATTCTCATGCATTCTGAATATATATTTTCATATACATATACATACATATGCATGAAGATTAATGGCATTTAAAGCTGTAATCTCTGGAGTTCGGGTAATAGTTGCCACTTCCTTTTCAGGATCTGCTTATTTTTACCATAAACACATTCTCTACGTTTAACACATAAAAGTTATTTTATACACAACATGTTTTATAGGAAAAGGGAGAAATTGCCATTCAGTTCCATTCAGCAAAGAGTCATAGAGCGTCTCCCATGTGTCCGGCAAGTGTAAGTTATCATGGTGACTAAACCTTTATTTCTAGCTGATGCTCAGGTTGGAAACACCGTGGGAGGGGTTACATCTAGGTGCATAGGAACAGGAGCATG…	TTACTGACTTCAAAAGACAAAGAGACTCTAAATTCTCATGCATTCTGAATATATATTTTCATATACATATACATACATATGCATGAAGATTAATGGCATTTAAAGCTGTAATCTCTGGAGTTCGGATAACAGTTGCCACTTCCTTTTCAGGATCTGCTTATTTTTACCATAAACACATTCTCTACGTTTAACACATAAAAGTTATTTTATACACAACATGTTTTATAGGAAAAGGGAGAAATTGCCATTCAGTTCCATTCAGCAAAGAGTCATAGAGCGTCTCCCATGTGTCCGGCAAGTGTAAGTTATCATGGTGACTAAACCTTTATTTCTAGCTGATGCTCAGGTTGGAAACACCGTGGGAGGGGTTACATCTAGGTGCATAGGAACAGGAGCATG…
chr14	30532099	30532100	285.5	32	B6xCAST	CATTGGTTGAGTGCTCGCTTAGCATACAGGAAGCCCTGTGGTCAATCTCTGCACTACATAAACAAGGCACATGTGACACACTTGTGGTCCCAGAAGAGAGAAGGTGCAAGCAAGAAGTTAATAACCAGTGTTCAGGGTTCAAGGTTATATAGAGAGTTCAAGGCTAGCCTGGGCTACACAAATCTCTACACCAAAGAAAAGGGAAAAATAGCCGGTAAGTGGTGGCACACACCTTTAATGCCAGCACTCCCCAGGTGGAGGGTGGGCAGCCTCTGTGGGCTCTGCTCAGGGGCCATCCTATACACGGCTGGGCTGGGCATGAGTGGAGTTACTCACAGGGCTCTTAGGGGCAGGGTAGGGAGAGAGAGATCTTCATACTTTCCGGGCAAGACTTGACTA…	CATTGGTTGAGTGCTCACTTAGCATACAGGAAGCCCTGTGGTCAATCTCTGCACTACATAAACAAGGCACATGTGACACACTTGTGGTCCCAGAAGAGAGAAGGTGCAAACAAGAAGTTAATAACCAGTGTTCAGGGTTCAAGGTTATATAGAGAGTTCAAGGCTAGCCTGGGCTACACAAATCTCTACACCAAAGAAAAGGAAAAAATAGCCGGTAAGTGGTGGCACACACCTTTAATGCCAGCACTCCCCAGGTGGAGGGTGGGCAGCCTCTGTGGGCTCTGCTCAGGGGCCATCCTATACACGGCTGGGCTGGGCATGAGTGGAGTTACTCACAGGGCTCTTAGGGGCAGGGTAGGGAGAGAGAGATCTTCATACTTGCCAGGCAAGACTTGACTT…
chr14	34608083	34608084	144.5	21	B6xCAST	GCCTTACTGCCTGCCTTCCCACACATCCTGGCATGCAGCTGGAAGAGGCGAAAAGCAACCTGCGTGGGCGGGGAATCTTTGTGAGGGTCTGGCCACCCCGAGACCAACAAGATGCAGTGTCTTGCAGTCCCTGATGCATAGACTGATGGCGATCTGAACTTGGTACCGTGCCTCTCTAAAGGGACAGGGTGTGAAAGGCAGGGCATGGCACTGGACGGAGGACAACCACTAAATACAGTGGAACCGCTAATGCCTGTGGCTGCCCCTCCCTGGAGAGAGGGAAGGAATGGAGACCAGGGTTAGGCCCTGAAATCAGGCCTCAGAATGCGAAGCTCACAGCCCAACCCATCCTGCCCTCTGCACTTCCCACGTTGCAAGTCTGTGGTTCCCACTAGGAAC…	GCCTTACTACCTGCCTTCCCACACATCCTGGCATGCAGCTGGAAGAGGCGAAAAGCAACCTGCGTGGGCGGGGAATCTTTGTGAGGGTCTGGCCACCCTGAGACCAACGAGATGCAGTGTCTTGCAGTCCCCGATGCAGAGACTGATGGCGATCTGAACTTGGTACTGTGCCTCTCTTCAGGGACAGGGTGTGAAAGGCAGGGCATGGCACTGGACGGAGGACAACCACTAAATACAGTGGAACCGCTAATGCCTGTGGCTGCCCCTCCCTGGAGAGAGGGAAGGGATGGAGACCAGGGTTAGGCCCTGAAATCAGGCTTCAGAATGCGAAGCTCACAGCCCAACCCATCCTGCCCTCTGCACTTCCCACGTTGCAAGTCTGTGGTTCCCGCTAGGAAC…
chr14	58205447	58205448	124	11	B6xCAST	AAAGAGCTGGCTTTCAAAAGTATAAGTCCCACTTACACTTTCTTTACCCTGTGTGGGTGACTATAAAATAGCTGGGCTTACATTTGGGGACATGAAGAAGGGGACTTCCTATTCAGACAGAGGGTTAGCTTGGCTAAGGTTCTGGTATGTATGTGTGTGTGTGAGAGAGAGTGTGAGTTTATATGTGTAGGTTCACATAGGTCTCACTTTATCTCACTTTATAGCTTCAGTGGGAAACTCAAAGCCATCCTCCTGCGCCGGAGTCTCTTCAGGACTGACATTATAGGGATGAACAATCACGGCTGCCATCATTGCTATTCTTCTTGTATCTGCTTACAGCCTGAGGTGGTTCATTTAATGAAATGATTTTTTTCAGAGTGACAGTTTGAAAACTTTCTC…	AAAGAGCTGGCTTTCAAAAGTATAAGTCCCACTTACACTTTCTTTACCCTGTGTGGGTGACTATAAAATAGCTGGGCTTACATTTGGGGACATGAAGAAGGGGACTTCCTATTCAGACAGAGGGTTAGCTTGGCTAAGGTTCTGGTATGTATGTATGTGTGTGTGAGAGAGTGTGAGTTTATATGTGTAGGTTCACATAGGTCTCACTTTATCTCACTTTATAGCTTCAGTGGGAAACTCAAAGCCATCCTCCTGCGCCGGAGTCTCTTCAGGACTGGGATTATAGGGATGAACAATCACGGCTGCCATCATTGCTATTCTTCTTGTATCTGCTTACAGCCTGAGGTGGTTCATTTAATGAAATGATTTTTTTCAGAGTGACAGTTTGAAAACTTTCTC…
chr14	61068559	61068560	111.5	16.5	B6xCAST	GATTAATACTCATTTTGTCCAGGGTATGCTTTGCTTTCTAACACAGTACCTTTGCTTTTCTGCTCTATAAATCACTTTGAATGATTCCTGGATCTGTATTTTTAATGATGATTCTCAGTTTCATGTGAAAGACTGTTAAGCCTGTACAGACATAGATTGCAAACTTTGGGAAAACCCAGCTAGCATGTTAGTCGGCATTGTGCTTGCTGAACTCAAGGTGAGTTCACTGGTAGGACATGGTTAATGCTCGGGGCATTATCTTCTTCAAATGTCATATCCCCTGGAGGCCAGGTGTTCCCTGCAGAAGTGGTGGGGGCCCAGCATCTACTTGCTGGAGAAAATAGAAAGGGAGCTGAGATGTCTAAGGAATTCCAGATTGTGGACAAAAGAGCTTTGTGG…	GATTAATACTCATTTTGTCCAGGGTATGCTTTGCTTTCTAACACAGTACCTTTGCTTTTCTGCTCTATAAATCACTTTGAATGATTCCTGGATCTGTATTTTTAATGATGATTCTCAGTTTCATGTGAAAGACTGTTAAGCCTGTACAGACATAGATTGCAAACTTTGGGAAAACCCAGCTAGCATGTTAGTCGGCATTGTGCTTGCTGAACTCAAGGTGAGTTCACTGGTAGGACATGGTTAATGCTCAGGGCATTATCTTCTTCAAATGTCATATCCCCTGGAGGCCAGGTGTTCCTTGCAGAAGTGGTGGGGGCCCAGCATCTACTTGCTGGAGAAAATAGAAAGGGAGCTGAGATGTCTAAGGAATTCCAGATTGTGGACAAAAGAGCTTTGTGG…
chr14	72784465	72784466	277	45.5	B6xCAST	AGTCAAATATTTAGATTTTTTTCTTTAAATTAGTGTAATTAATTACGTGAGTATTTGAGCTGCTAACAAGGTACAGACATGTTCAAAGTAATTGCTGCCTATGTCCACTTCCTGGCCAATATTTTACCAGGCCCTGAGTTATATAGCCTAGAAATCAAGTTTGTCCTTTACTACAGAATCATGACAGGACCAGAAGAAAAGGTTCTTGTTGTTTAATCAGCAGGAGTGCTGGGGAAGCAAGAAAAAAATGCTATTGTGTGATAAGGGTCTGACTACAGACCACCAAGCAGGCACTTCGAGAATATGATCACATATACTTCTAGGGAGAGAGAGAGAGAGAGAGAGAGAGAGAGAGAGAGAGAGAGAGAGAGAGAGAGAAAGAGAGAGAGAGAGAGAGAG…	AAGTCAAATATTTAGATTTTTTCTTTAAATTAGTGTAATTAATTACGTGAGTATTTGAGCTGCTAACAAGGTACAGACATGTTCAAAGTAATTGCTCCCTATGTCCACTTCCTGGCCAATATTTTACCAGGCCCTGAGTTATATAGCCTAGAAATCAAGTTTGTCCTTTACTACCGAATCATGACAGGACCAGAAGAAAAGTTTCTTGTTGTTTAATCAGCAGGAGTACTGGGGAAGCAAGAAAAAAATGCTATTGTGTGATAAGGGTCTGACTACAGACCACCAAGCAGGCACTTCGAGAATATGATCACATATACTTCTAGGGAGAGAGAGAGAGAGAGAGAGAGAGAGAGAGAGAGAGAGAGAGAGAGAGAGAGAAAGAGAGAGAGAGAGAGAGAG…
chr14	86053904	86053905	91	10.5	B6xCAST	CTCAATTGAGAGCAGCTCAGGCTAGAAGAAGTAAAAATGCACTTTCAGGTCATCTATAATCCCAGCATAGAGGTTATAAGAAAGTTCAAATCAGTTACACAGAAATGCTTGCACTTCTGAGCATAGTGTATGAATTTCTAGTCTTACCACATTCTCATACCTGTTTCGCATGCATATCTTAAAAGAAATATCACATTTCAGGACCACGAAGAGAATTTAACCATTGAACAGGAACAAACATAATTTGCATAAATTTCCATCTTACTCTCGAACAACAGATTCTGAAATTAATTTATATGTGTAACATGGTACATTATATGTGACAAGCACTGTGAGCCCCCAAGGCAAGCTTCCTTAGACAAAAACACCTTCCTCTTTCAGATAGGATGTGAGCTGTGA…	CTCAATTGAGAGTAGCTCAGGCTAGAAGAAGTAAAAATGCACTTTCAGGTCATCTATAATCCCAGCATAGAGGTTATAAGAAAGTTCAAATCAGTTACACAGAAATGTTTGCACTTCTGAGCATAGTGTATGAATTTCTAGTCTTACCACATTCTCATACCTGTTTCGCATGCATATCTTAAAAGAAATATCACATTTCAGGACCACGAAGAGAATTTAACCATTGAACAGGAACAAACATAATTTGCATAAATTTCCATCTTACTCTCGAACAACAGATTCTGAAATTAATTTATATGTGTAACATGGTACATTATATGTGACAAGCACTGTGAGCCCCCAAGGCAAGCTTCCTTAGACAAAAACACCTTCCTCTTTCAGATAGGATGTGAGCTGTGA…
chr14	119872379	119872380	571	11	B6xCAST	TTTTTTCAAACAGAAAATCAAAACAGGCCAGAAAGCATCAGATTGATTCTTTTAAACTTACTGTGCATTTTGGCAAGGACTTCTGGAAGGTAGCCCCTACTACCTTCACACTATTCCTCTGGGACCTTGGGGATTATATCAAAAGGCTCACTGACACCTCACTGCTGAATGCACAGGGTATGGCCTTCCCTCTGGATGAGAGCAGACTCCATTCAGGAGCATCACAGTCGTCATGTCCCCAGGGTCCTGCACTGATAGAAATGGAGAGGTGGGGATGTAAAGTGTTCCCTGGAGACCGAATGCCCAGCTCCATGATGGGTGCTGCTGTAGGAAGGAGTGACAGGCCCAGGAAGCTAAGGATGTGTGAGAAGTCTTATGTCCCAAAACACATTAGTTCTA…	CAGTATTTTTTCAAACAGAAAATCAAAACAGGCCAGAAAGCATCAGATTGATTCTTTTAAACTTACTGTGCATTTTGGCAAAGACTTCTGGAAGGTAGCCCCTACTACCTTCACACTATTCCTCTGGGACCTTGGGGATTATATCAAAAGGCTCACTGACACCTCACTGCTGAATGCACAGGGTATGGCCTTCCGTCTGGATGAGAGCAGACTCCATTCAGAAGCATCACAATCGTCATGTCCCCAGGGTCCTGCACTGATAGAAATGGAGAGGTGGGGATGTAAAATGTTCCCTGGAGACCGAATGCCCGGCTCCATGATGGGTGCTGCTGTAGGAAGCAGTGACAGGCCCAGGAAGCTAAGGATGTGTGAGAAGTCTTATGTCCCAAAACTCATTAG…
chr14	119875082	119875083	192	22.5	B6xCAST	CAGGTTATCAGATTCCTTCCCAGTCATCTGGCTGATTGATCGGAGACTGAGGACTACGGACCACATAGCAACCATAGAAGAAAGTAGGGCTGCAAGAGGCAGACCACCCAATGAGAGAAAGATGATGGTTAAAATTCATGCCGGACAGCAGTGTAATATAGGAACATGGACAGGATGCAGCTTCCGTCCTCAGGATGAAGGGCAGCCCTGAAACACATGACTATATGTTTCTAGACATTTAGGAAAGCACAAGGAGGGATGCGAGCCATGATGCAGGATCAGAGGCTCAGGTAGGCTTGAGGGTCTGAAGACTGACTGGGGGAAGGGATTGGATTACACGGAGAGCTGTGCTGGACGCTGGCAAGAATGCACTGATGTGAACATAGCCGTCATTCTAGG…	CAGGTTATCAGATTCCTTCCCAGTCATCTGGCTGATGGATCGGAGACTGAGGACTATGGACCACATAGCAACTATAGAAGAAAGTAGGGCTGCAAGAGGCAGACCACCCAATGAGAGAAAGATGATGGTTAAAATTCATGCCGGACAACAGTGTAATATAGGAACATGGACAGGATGCAGCTTCCATCCTCAGGATGAAGGGCAGCCCTGAAACACATGACTACATGCTTCTAGACACTTAGGAAAGCACAAGGAGGGATGCGAGCCATGAGGCAGGATCAGAGGCTCAGGTAGGCTTGAGGGTCTGAAGACTGACTGGGGGAAGGAATTGGATTACATGGAGAGCTGTGCTGGACGCTGGCAAGAATGCACTGATGTGAACATAGCCGTCATTCTAGG…
chr14	120854832	120854833	453	22.5	B6xCAST	AGAAGGCAGATGGCTGTGGCTGTGGCTGTGACTGTAAACTACCGTGTTTCGTGTCAAATTGGCCCAGCAGTCATTTTTGCCTTTGTTTGGCTGACACCTGGTTCCACAGGAAGGAAATTGTAAAGAAGGTGTCACTTTTTCTTCTTGAACTTGCTATTGTGTACTGAGAGTCTCATTTTTTTTCTCATCTCAAAGACTCAAGCCTTTAGGGAACCTTAGGGATGAGGTTACAACAATGGAATGTCAGACAGATGTAAATATTCAGGATTCTGCATCTGTCTCACAGATTAAAGAATTCTTGGAAGCTTGGTTCCTGAGTCTTCAGAATCAATCATCTACCCACCGAAAAATCACTGGTTTTGCAGTGAACATGCCCTGACATTTTTCCAGTCATTGGTC…	GGCAAAGAGAAGGCAGATGGCTGTGGCTGTGACTGTAAACTACCGTGTTTCGTGTCAAATTGGCCCAGCAGTCATTTTTGCCTTTGTTTGGCTGACACCTGGTTCCACAGGAAGGAAATTGTAAAGAAGGCGTCACTTTTTCTTCTTGAACTTGCTATTGTGTACTGAGAGTCTCATTTTTTTCTTGTCTCAAAGACTCAAGCCTTTAGGGAACCTTAGGGATGAGGTTACAACAATGGAAAGTCAGACAGATGTAAATATTCAGGATTCTGCATCTGTCTCACAGATTAAAGAATTCTTGGAAGCTTGGTTCCTGAGTCTTCAGAATCAATCATCTACCCACCGAAAAATCACTGGTTTTGCAGTGAACATGCCCTGACATTTTTCCAGTCATTGGTC…
chr15	6025930	6025931	401	34	B6xCAST	TTTTACCTCACTCCAGTGTTAACATTGACTGTCTCCTTTATAGCTCTTGATATAATCACATAGGAGAAGCCCTTTATGAGTTTATTGACAGCAACTCAACAACAGATCATAAAAGCAGTCAGATTTCCACGGTTGCTCAGAAGATCTCCTTTATCCATTCTAGAGAGTTTACTGATAAAACTCTGCTCCCCTGGTTGCAGTCATAGAAGCTGCTGAACTCTGTAAAACAGAGGCAGTCATGGTCTTGGAGATAAGTGGAACTTCTGCCCTTTCATCTCCCTCCGGAATCCTTGTCCATGGTGTGATTTAATACATGCTTCCAGCTTGGGCTCTCATCAAGCAGACAGTATAACATTGTACACTTTGACCTTTGACTGATTCACTCGTCTAATAGCATCT…	TTTTACCTCACTCCAGTGTTAACATTGACTGTCTCCTTTATAGCTCTTGATATAATCACATAGGAGAAGCCCTTTATGAGTTTATTGACAGCAACTCAACAACAGATCATAAAAGCAGTCGGATTTCCACGGTTGCTCAGAAGATCTCCTTTATCCATTCCAGAGAGTTTACTGATAAAATTCTGCTCCCCTGGTTGCAGTCATAGAAGCTGCTGAACTCTGTAAAACAGAGGCAGTCATGGTCTTGGAGATAAGTGGAACTTCTGCCCTTTCAACTCCCTCCGGAATCCTTGTCCAGGGTGTGATTTAATACATGCTTCCAGCTTGGGCTCTCATCAAGCAGACAGTATAACATTTTACACTTTGACCTTTGACTGATTCACTCGTCTAATAGCATCT…
chr15	6646130	6646131	527.5	71.5	B6xCAST	TTGTTTCACACAGCCTTCCTAATTTTATCCTTTGTGTGACACACCAAAGAGCAGTGAATAAACAGCACACTTACCATGCTGAGGACACAGAACAAGAAGTCTTCTCTTGAGCAACATTGCTCAAATGTAACCTTCACTTGGTGCCAAAGGAAGGCTACTTTTCTGCCTTGTTTGCACACTGCCAAATTCTGATTTGTGGTTATTTGAGCGAATGTCTTTATATCATACTTTAACCAGTCATTCCTGTGCTGTACATGAATCTTTCAGAAGTGAGTGAGCATGTGTGTGGGGAGGGGGTCTGCTGTGTGTGTGTGTCTGCTTGCGTGCATGCGAATGTGCTCATGCTTGTGTGAATGCATGTGTGTGTGTGCGCGCGCACGCTCGTGTGTGCTTAACTGT…	TGTTTCACACAGCCTTCCTAATTTTATCCTTTGTGTGACGCACCAAAGAGCAGTGAATAAACAGCACACTTACCATGCTGAGGACACAGAACAAGAAGTCTTCTCTTGAGCAACATTGCTCAAATGTAACCTTCACTTGGTGCCAAAGGAAGGCTACTTTTCTGCCTTGTTTGCACACTACCAAATTCTGATTTGTGGTTATTTGAGCGAATGTCTTTATATCATACTTTAACCAGTCATTCCTGTGCTGTACATGAATCTTTCAGAAGTGAGTGAGCATGTGTGTGGGGAGGGGGTCTGCTGTGTGTGTGTGTCTGCTTGCGTGCATGCGAATGTGCTCATGCTTGTGTGAATGCATGTGTGTGTGTGTGCGCGCACGCTTGTGTGTGCTTAACTGTC…
chr15	30562575	30562576	278	31	B6xCAST	CTGAATCACGTTAGAATATGTCATCTGACTAGACATCTGTGTCTTGTTTTTGGATCTGAATTCAATGTTTCAGTGAAATTGTAGCTCATATGAGTTTAACATTAGCTCTATCTTCATTAGACTTCATTTTTCATACATTTATGTGTTCTAACTTACCTAGCAGGAAGAGTATGAGAAATTCAAGATCTGCTGATTCTTTGTTTGCACTGTGTGTGTATGTGAGAAACTGGGTTTGGTTTTTCATGCTCAATTGAATGCACAATAAACACTATCAGCCACACCAGAAAACCTTATGTATCGTGTTCATCGTTGGCTTGGGGAGGCTGGTGGGTAAATAGGAATAGGCACAAGCATCTCCCTGTTCCTTGAGTGTCTAAAAGTTTAAATGTAAGTTTGAAG…	TGAATCATGTTAGAATATGTCATCTGACTGGACATCTGTGTCTTGTTTTTGGATCTGAATTCAATGTTTCAGTGAAATTGTAGCTCATATGAGTTCAACATTAGCTCTATCTTCATTAGACTTCATTTTTCATACATTTATGTGTTCTAACTTACCTAGCAGGAAGAGTATGAGAAATTCAAGATCTGCTGATTCTTTGTTTGCAGTGTGTGTGTATGTGAGAAACTGGGTTTGGTTTTTCATGCTCAATTGAATGCACAATAAACACTATCAGCCACACCAGAAAACCTTATGTATCGTGTTCATCGTTGGCTTGGGGAGGCTGGTGGGTAAATAGGAATAGGCACAAGCATCTCCCTGTTCCTTGAGTGTCTAAAAGCTTAAATGTAAGTTTGAAGA…
chr15	37549722	37549723	677.5	74	B6xCAST	CACAAATCCTTCCCATTGGGAAGGCTGACATCCTAACAACGGGGAGGTAATTGGAGTTGCAAAGCATCTGTGTCCAATGCTGAGTCAGTTGCATCCCAGGATGATGGAATCCACGTGGGGGTGGTTCCCAGGGTTTGTTCGGGCAGCTCTGGTCTGGTGACCCTCATTCAGTATTTACCACACATCCGTTTTAGTCCGAGTGAAGGACTCAGCTGGACAATTGTACTTTCTTACTCAATTTTAAAACTCTTGTGTCCCTAAGTGGAAGGGAAAGGGCACTAGGGAGAGAAAACAAAGTGGCCAGCAAAAGTGTAAAAAGGAAGAAACAGCAAACCAGCTCTTCTCAAGGGATCTTAAATCCGGATTTGTGCCGGGCTAAGCACATTCCTGTGTTGATGT…	CACAAATCCTTCCCATTGGGAAGGCTGACATCCTAACAATGGGGAGGTAGTTGGAGTTGCAAAGCATCTGTGTCCAATGCTGGGTCAGTTGCATCCCAGGATGATGGAATCCATGTGGGGGTGGTTCCCAGGGCTTGTTCGGGCAGCTCTGGTCTGGTGACCCTCATTCAGTATTTACCACACATCCGTTTTAGTCCGAGTGAAGGACTCAGCTGGACAATTGTACTTTCTTACCCAATTTTAAAATTCTTGTGTCCCTAAGTGGAAGGGAAAGGGCACTAGGGAGAGAAAACAAAGTGGCCAGCAAAAGTGTAAAAAGGAAGAAACAGCAAACCAGCTCTTCTCAAGGGACCTTAAATCCGGATTTGTGCCGGGCTAAGCACATTCCTGTGTTGATGT…
chr15	41699723	41699724	241	42.5	B6xCAST	GACTTTTCTGTGCCTCTATAAGCCGTGGAAACTCCCAATTTGAACAGAAGGGGCTTTACAAATCTAGATACTTGAGGACGACATCAAGAAGTTGCTGTTAAGGGTACTACTACCTGTGATCCTGGCTGTGTAGTGGCCACTTCCATCTCTGTACACACACTAACTGAACTGAGGACTATTCCCATGATGGTGTTGGTTGGAGACATTGGCAACTTGAGAGACAGCACCAAACCCTGGAAGGGTGAGCAGGGTCACCACAAATGGATACTTTGCCTCCATTCCAAGACTGGTTTTGGATGCGAGTAACAGAAAATCACTATTAAACTTATTTAAACAAATCCAGCATTCAAAGTTAGCCTGCCTGTGGTTCACAGGTTAGGTCAGTTGAAATGAGTCTGA…	AAATGACTTTTCTGTGCCCCTATAAGCCGTGGAAACTCCCAATTTGAACAGAAGGGGCTTTACAAATCTAGATACTTGAGGACGACATCAAGAAGTTGCTGTTAAGGGTACTACTACCTGTGATCCTGGCTGTGTAGTGGCCACTTCCATCTCTGTACACACACTGAGCTGAGGACTATTCCCATGATGGTGTTGGTTGGAGACATTGTCAACTTGAGGGACAGCACCAAACCCTGGAAGGGTGAGCAGGGTCACCGCAAATGGATACTTTGCCTCCATTCCAAGACTGGTTTTGGATGCGAGTAACAGAAAATCACTATTAAACTTATTTCAACAAATCCAGCATTCAAAGTTAGCCTACCTGTGGTTCACAGGTTAGGTCAGTTGAAATGAGTCTGA…
chr15	41716923	41716924	312.5	57	B6xCAST	AAGTAAGTGGAGATAGACGAGATAAAGAAAAAACACACAAAGCAAACATTTAGTAAGCTCAGTGGTGAGTGCTATGAAGTAAAGATGTCTCAAGCCAGGTAAAGGAAGTTAGAAGGCTACGGCCAGGATATATCCCAGTTTTCTTTAACAGTGGTAAGAGTAAGCATGGAGTTGGAGATACAGGGAAGTTATCAGGTACAAGGGAAACAGAGTTCAGTGAAGAAGGGGAGCTGGTCACTGAGTAGATAAGTGTGGCTCTTAGAATGAATAACGGATGAAGAGTGAGCTTGAGTAGGTCATGGGGACCTGACTGTAGCATATTGGAAGCTGTTACCGTGGATTATATGACTATCATCTTTACTGTAAGTTCAATGAATGGTTACCATTGACCCTCAGGAA…	AAAGTAGGAAAGTAAGTGGAGATAGACGAGATAAAGAAAAAACACACAAAGCAAACGTTTAGTAAGCTCAGTGGTGAAGTAAAGACGTCTCAAGCCAGGTAAAGGAAGTTAGAAGGCTCCGGCCAGGATATATCCCAGTTTTCTTTAACAGTGGTAAGAGTAAGCATGGAGTTGGAGATACAGGGAAGTTATCAGGTACAAGGGAAACAGAGTTCAGTGAAGAAGGGGAGCTGGTCACTGAGTAGATAAGTGTGGCTCTTAGAATGAATAACGGATGAAGAGTGAGCTTGAGTAGGTCATGGGGACCTGACTGTAGCATATTGGAAGCTGTTACCGTGGATTATATGACTATCGTCTTTACTGTAAGTTCAATGAATGGTTACCATTGACCCTCAGGAA…
chr15	45783512	45783513	280.5	9	B6xCAST	CTGCTGATCTTGGTAATTATTCCATCGTACTGGCATTTCCAATAAAATGGGGGTCTCCCACTGCAACTAGACTTCACCAATTGCTTCCAATAGACTCTGTTCATGGTGCCAAGCCTCATTTCATTGTGTGACCCCTTCAGTCCTTGTCCATCAACTGCAACTGAGGCTGCACCTTCAACAATGGTTTCCAAAGCCAAGCCTCAGTTGGTCTTCATGACTCTTTCATGCCTTCAAAACTAGTACCACATGGGTGACTCTTTCACCTTACCAAGTATAGATGAAGCACAAGGCACAACTTTGGCTATCTCTGGAACTTCTTTGTATTCTCAGAAAACACTTACCAGATTTTACTTCAGTGATAACTGGTCTCATCTTAATCAATGCTAATTTCTTAGCTCC…	CTGATAATCTTGGTAATTATTCCATTGTACTGGCATTTCCAATAAAATGGGGGTCTCCCACTGCAACTAGACTTCACCAATTGCTTCCAATAGACTCTGTTCGTGGTGTCAAGCCTCATTTCATTGTGTGACCCCTTCAGTCCTTGTCCATCAACTGCAACTGAGGCTGCACCTTCAACAATGGTTTCCAAAGCCAAGCCTCAGTTGGTCTTCATGACTCTTTCATGCCTTCAAAACTAGTACCACATGGGTGACTCTTTCACATTACCAAGTATAGATGAAACACAAGGCACAACTTTGGCTATCTCTGGAACTTCTTTGTATTCTCAGAAAACACTTACCAGATTTTACTTCAGTGATAACTGGTCTCATCTTAATCATTGCTAATTTCTTAGCTCC…
chr15	63270644	63270645	193.5	29	B6xCAST	CTAGAACTCACTAACTGGGCTAGGTAACTGAGCAGCTGGCCCAGGGATCATCCTGTCTTCATCTTCTCTGCACTGGGATTAGGAGCACACTTCCATACTTCTTTCCGTATCTTCTAGAGATCCAACTCAGTTCTATTTGCTGGCAAGGCTAACAGTCTACTGCCTGACTTGACTCCCTAGCCCTTCTCTCTAACATTTCTAATCCTGAGCAATGAGGTTGTACTTAACAAATAGCTGCCTGGTTAAAAGTCCCCAGACAGAGGAAGAGAGTGCACTCCAGACAGAGCCTGTGGAGTAGGTCCTAGGACTAGTCTGGGCTGAAGCAAGGCCCTGAATCTATTTATCAGTGGTGGTGGTGTCCTTTGAAGTGGCTTCATTTGGCCTTGGCAGGAGCTGAGC…	CTAGAACTCACTAACTGGGCTAGGTAACTGAGCAGCTGGCCCAGGGATCATCCTGTCTTCATCTTCTCTGCACTGGGATTAGGAGCACACTTCCATACTTCTTTCCGTATCTTCTAGAGATCCAACTCAGTTCTATTTGCTGGCAAGGCTAACAGTCTACTGCCTGACTTGACTCCCTAGCCCTTCTCTCTAACATTTCTAATCCTGAGCAATGAGGTTGTACTTAACAAATAGCTGCCTGGTTAAAAGTCCCCAGACAGAGGAAGAGAGTGCACTCCAGACAGAGCCTGTGGAGTAGGTCCTAGGACTAGTCTGGGCTGAAGCAAGGCCCTGAATCTATTTATCAGTGGTGGTGGTGTCCTTTGAAGTGGCTTCATTTGGCCTTGGCAGGAGCTGAGC…
chr15	63614262	63614263	808	119	B6xCAST	TACAAGTCCACCTATATCTGTTGCACTTTCTCTGGGATTAAAAGCATGTGCCACCATGCGCAGACATTTGAAAATATTTTCACTTAAGGATGAATGTAAGTACTCACTAGACAACAAAAAGTCACCTGAAGCCTAAAAGGCTCCAAAGGACACAGTGCATCATCCGCACTGACTGGTTCAGTCCCACTAGGTTCTTAGTTTCCATGGAAATAAGCCTAGGGAGTCTTATGGCATACTTTTTCAAGGTTGTCTTTCTCCTGGAAAGGGGATTGTTTATCTTCTTAAACTTACTATTATTTCTGGAAAATGATATATTTATTCACTATACTCCTATGTGAGTACATTGTTTAGTGTGTATGTACGAGTGCCATCATACACATACCATGTCAGACATACAGA…	TACAAGTCCACCTATATCTGTTGCACTTTCTCTGGGATTAAAAGCATGTGCCACCATGCGCAGACATTTGAAAATATTTTCACTTAAGGATGAATGTAAGTACTCACTAGACAACAAAAAGTCACCTGAAGCCTAAAAGGCTCCAAAGGACACAGTGCATCATCCGCACTGACTGGTTCAGTCCCACTAGGTTCTTAGTTTCCATGGAAATAAGCCTAGGGAGTCTTATGGCATACTTTTTCAAGGTTGTCTTTCTCCTGGAAAGGGGATTGTTTATCTTCTTAAACTTACTATTATTTCTGGAAAATGATATATTTATTCACTATACTCCAATGTGAGTACATTGTTTAGTGTGTATGTACGAATGCCATCATACACATACCATGTCAGACATACAGA…
chr15	67024605	67024606	188	23.5	B6xCAST	AGAAAGAGAGAAGCACACACAGAGAAAGAAAAGAAGAAGAGACACACACACCAGAGTTTCTGAGTTATATAGGGAGGATCCTCTGGGGGAAGGGCAGCCTAGCCCCTGGGCTGGAAAGTTCAGGGTTGGGGGCAGAGTATCCCAGGTAGGGACTGAGGAATTCTGGAAGACTCTGGGAGGCCAGATCTGCTTTGGTGTGTCTGCTTTGGTGTGTAAAATAAAATATGTGACTCATTCTCTTGTGGGGGGTGGGGTGGTCTAAAACCAAACATTTGTATTCAGGCTGTGGCCCCAACAACATCCTCTCCTAGGGTCTCAGTGACATTTGACTATGTTCCTCTGGAGAATTTGGAAACTGTGAAAAGGACCTGGCTCAGATCCCCCACTAGATAAATAGTG…	AGAGAGAAGCACACACAGAGAAAGAAAAGGAGAAGAAGAGACACACACACCAGAATTTCTGAGTTATATAGGGAGGATCCTCTGGGGGAAGGGCAGCCTAGCCCCTGGGCTGGAAAGTTCAGGGTTGGGGGCAGAGTATCCCAGGTAGGGACTGAGGAATTCTGGAAGACTCTGGGAGGCCAGATCTGCTTTGGTGTGTCTACTTTGGTGTGTAAAATAAAATATGTGACTCATTCTCTTGTGGGGGGGTGGGGTGGTCTAAAACCAAACATTTGTATTCAGGCTGTGGCCCCAACAACATCCTCTCCTAGGGTCTCAGTGACATTTGACTATGTTCCTCTGGAGAATTTGGAAACTGTGAAAAGGACCTGGCTCAGATCCCCCACTAGATAAATAGTG…
chr15	68972571	68972572	189	11	B6xCAST	TTCCCTTTCAGTCCTGATTCTCCCACACATCTTAGCCAAAGGTACTTAACCAAAAGTACTTGTGTAAGTTTTAATCTCTTTTGGATTGTTTACACTTACGGTAAGCAATTTTCTTACTTTGAGCAATTTCACCTTCTTAACTAGCCACTGCTGACCACCTTTGCCCTATTTTTGCCCGTTCTGTAGAACTTTTTAGGCCATCCCCAAATCGTTTTCCTCTCTAGTGAGCTAGTGAGACCTCAGCAATATCGCACATCCACCTTTGTGGTTTGGCTTTCTTGGGCCAGCTGCTGTAGCTGCTGCACTTGGCTCCTGATCTAAAGCCACACCTTTGGACCCTGGGCCCTGTTGGTTTTGGAGTGTTTATCTTAGTCCCTGGCTCATAGAATTGTACTTAAC…	TTTTCCCTTTCAGTCCTGATTCTCCCACACATCTTAGCCAAAGGTACTTAACCAAAAGTACTTGTGTAAGTTTTAATCTCTTTTGGATTGTTTACACTTACGGTAAGCAATTTTCTTACTTTGAGCAATTTCACCTTCTTAACTAGCCACTGCTGACCACCTTTGCCCTATTTTTGCCTGTTCTGTAGAACTTTTTAGGCCTTCCCCCAAATTGTTTTCCTCTCTAGTGAACTAGTGAGACCTCAGCAATATTGCACATCCACCTTTGTGGTTTGGCTTTCTTGGGCCAGCTGCCGTAGCTGCACTTGGCTCCTGATCTAAAGCCACACCTTTGGACCCTGGGCCCTGTTGGTTTTGGAGTGTTTATCTTAGTCCCTGGCTCATAGAATTGTACTTAAC…
chr15	73505953	73505954	138	22	B6xCAST	TGACAGCCTCTATCTGTTTGTCTGGCTGCTTCTCCAGTCTTGCAGCTGATGAGATGCATGCATGCTGGAGGCATGGGGCTAGGACCACGGTCTGGGATGGGTCAGTTATTGTGTTAGAGGCTCGAGGACTTCAGCAACTCCACCAGGTGACCATGGGCATCAGCAACATGATGAGCACCTTGAGAGACCATGGGGTTACTCCATGGGTGGAGGGAAGAAGGTGTCAGGTGAGAGAGGCCACCCTGGTAGAGGCTGTGTCTGATCCTATGAAAGGCTAGGAGTAGCATATGGAAGAGGGACAGCAAGAATACAAAGTGACCTTGTACAACTTCAGAAGGCTGAGCTTTCCTCCTGGCCAGCAGGGTGGGCACTTACATCTCCTTTCCCATTTCCCCTCAG…	TGACAGCCTCTATCTGTTTGTCTGGCTGCTTCCCCAGTCTTGCAGCTGATGAGATGCATGCATGCTGGAGGCATGGGGCTAGGACCACGGTCTGGGATGGGTCAGTTATTGTGTTAGAGGCTCGAGGACTTCAGCAACTCCACCAGGTGACCATGGGCATCAGCAACATGATGAGCACCTTGAGAGACCATGGGGTTACTCCATGGGTGGAGGGAAGAAGGTGTCAGGTGAGAGAGGCCACCCTGGTAGAGGCTGTGTCTGATCCTATGAAAGGCTAGGAGTAGCATGTGGAAGAGGGACAGCAAGAATACAAAGTGACCTTGTACAACTTCAGAAGGCTGAGCTTTCCTCCTGGCCAGCAGGGTGGGCACTTACATCTCCTTTCCCATTTCCCCTCAG…
chr15	82881357	82881358	97	15	B6xCAST	TTTTACAATTCAGTTTAAGCATTAGCATTAAGGGAAAAAGGGGTGCTTAGAGAGAAAAGACACCTAAGAATATGGGTGTTGACTTCTCTAAGTAATAACCAAAAAAGAGAAACCTAAGCAGGTAATTCTTAATCAGTTTTATTCATGATGACATAAATAATTCTGAACACCTTCTTTTCTTCTATTAATTGAGCAAGTCTGAAGAAGAACCTGAGTCTTAGAAGATTAAAGAAGGAAGGTAAATTCTACCAGGAATTAGTGAAGAAAAACTGCTTACTAGGGATCGAAGACCCACTGCAAACATGGAATCCTCCAGCCACTTGGAAACTTGCCTTGTAAAATGGACCTGTTGTTACCACACCCAACTTTGAAAATACCAGATATGCACTCAGGTGGGAG…	TACAATTCAGTTTAAGCATTAGCATTAAGGGAAAAAGGGGTGCTTAGAGAGAAAAGACACCTAAGAATATGGGTGTTGACTTCTCTAAGTAATAACCAAAAAAGAGAAACCTAAGCAGGTAATTCTTAATCAGTTTTATTCATGATGACATAAATAATTCTGAACACCTTCTTTTCTTCTATTAATTGAGCAAGTCTGAAGAAGAACCTGAGTCTTAGAAGATTAAAGAAGGAAGGTAAATTCTACCAGGAATTAGTGAAGAAAAACTGCTTACTAGGGATCGAAGAACCAATGCAAACATGGAATCCTCCAGCCACTTGGAAACTTGCCTTGTAAAATGGACCTGTTGTTACCACACCCAAATACTTTGAAAATACCAGATATGCACTCAGGTGGGAG…
chr15	87562605	87562606	118	11	B6xCAST	GAATAATGCCTTCCACTGTGCTTGCAGACAAACGGTAATTTCCAAGAGACTTTTAAGTAGAACTAAAGGCAAATAAAATAAAAAACTAAGACTCCCTAGGTGCAGACTGGCAGGGAGACCAGAAGGTAGGCCGAGGCCCAGTCTGTGCTCAGCTCTGCTGTGGAGCCAGCACAGTAACGCTAAGCAAATACTCTCCCCTGGCAGAGTGCTATCCATATACAGGGAGCTTCCTGGAGAGGAAGCAGTATTGGACATGAGTCCCCTCAAGGCCAGCCTCCACCAAGCAGCATGCTTGCAGAGTTCCTTTGGTTCAAGTCATGTTTTCAGTTACAGGGATGGATTTCCTCCCGGACAGCACCCAACATCAGTTTTGGAACTTGAAAATAGTGATATCAAGAG…	GAATAATGCCTTCCACTGTGCTTGCAGACAAACGGTAATTTCCAAGAGACTTTTAAGTAGAACTAAAGGCAAATAAAATAAAAAACTAAGACTCCCTAGGTGCAGACTGGCAGGGAGACCAGAAGGTAGGCCGAGGCCCAGTCTGTGCTCAGCTCTGCTGTGGAGCCAGCACAGTAACGCTAAGCAAGTACTCTCCCCTGGCAGAGTGCTATCCATATACAGGGGGCTTCCTGGAGAGGAAGCAGTATTGGACATGGGTCCCCTCAAGGCCAGCCTCCACCAAGCAGCATGCTTGCAGAGTTCCTTTGGTTCAAGTCATGTTTTCAGTTACAGGGATGGATTTCCTCCCGGACAGCACCCAACATCAGTTTTGGAACTTGAAAATAGTGATATCAAGAG…
chr15	91975828	91975829	152	20.5	B6xCAST	AAGGATGAAAATGTAATTTGAAACCAGAAAGTAAGATATGAGTCAAATTTTGATTATCTTCAGCGTATAAACATTCTCCTTCTGTGATAGTAGAGATCTAGAGCAAAATATCCTTTACAGCGGTGGTGGTAAGGGAGCTTAGGATAGACTCCTGTGAACAAATCTGCTCACCGATGGATGCCTGCAAAAGGCATTCTGCCCTTCCCCCATCCCTAGGTCAAAATTGGGGTTTGACTTAAATATTAGTCAGCTTTAATCTTCCCTGCTACCAGGAAGGCTCTTTAAGAGCCAGACGGAGAGAAGTTCTCTGACCTACCTTGTCTGCTAGTAGATTATAAAATCATCTCTCCTGGTGAGCCCTGTCTATGGCTGCTGTACAGAGGCCAAGAAGAAGCTGGA…	AAGGAAGAAAATGTAATTTGAAACCAGAAAGTAAGATACGAGTCAAATTTTGATTATCTTCAGCGTATAAACCTTCTCCTTCTGTGATAGTAGAGATCTAGAGCAGGATATCCTTTACAGCGGTGGTGGTAGGGGAGCTTAGGATAGACTCCTGTGAACAAATCTGCTCACCGATGGATGCCTGCAAAAGGCATTCTGCCCGTCCCCCATCCCTAGGTCAAAATTGGGGTTTGACTTAAATATTAGTCAGCTTTAATCTCCCCTGCTACCAGGAAGGCTCTTTAAGAGCCAGACAGAGAGAAGTTTTCTGACCTACCTTGTCTGCTAGTAGATTATAACATCATCTCTCCTGGTGAGCCCTGTCTATGGCTGCTGTACAGAGGCCAAGAAGAAGCTGGA…
chr15	97054339	97054340	384.5	10.5	B6xCAST	GTTTATGGTCATGTGGAAGTGATTCTGTTTTCCATTTCTCCCGTGGCTCCCATCCTATCATGACACATAGTAGTGCCTTTCTGTTCTCGTCCCTCCTGGTTTACTGTCTTTAAATAAAGAGACAAAGAGGAACCTCTTTGGAGGATCTAAGGACACTTTCACGGAGGAGTCACATCAAAAATCCTGCGTGCTTATCAAACATTACGATTCGTGACAGTAACAAAACTATAGTTATGAAGCAGCAATGGAGTAATTTTACGGCTGGGTGTTCACCGAGGCATGAGGTTCGATCTTAAAGGGTCTGAGTATTAGGAAGGCTGATTTATCCTTTCACCACAACACACATAATGAGAACCAAAACATCAAGCAAGCGCCGGTCTGCCTCACTCCAGCTTTTCT…	TTTATGGTCATGTGGAAGTGATTCTGTTTTCCATTTCTCCCGTGGCTCCCATCCTATCATGACACATAGTAGTGCCTTTCTGTTCTCGTCCCTCCTGGTTTACTGTCTTTAAATAAAGAGACAAAGAGGAACCTCTTTGGAGGATCTAAGGACACTTTCACGGAGGAGTCACATCAAAAATCCTGCGTGCTTATCAAACATTACGATTTGTGACAGTAACAAAACTATAGTTATGAAGCAGCAATGGAGTAATTTTACGGCTGGGTGTTCACCGAGGCATGAGGTTCGATCTTAAAGGGTCTGAGTATTAGGAAGGCTGATTTATCCTTTCACCGCAACACACATAATGAGAACCAAAACATCAAGCAAGCGCCGGTCTGCCTCACTCCAGCTTTTCTG…
[truncated: 2,715 more rows]
