# Supplementary figures and images for: Characterization of sequence determinants of enhancer function using natural genetic variation
Source: eLife journal article supplement (doi:10.7554/elife.76500), 2022-08-31

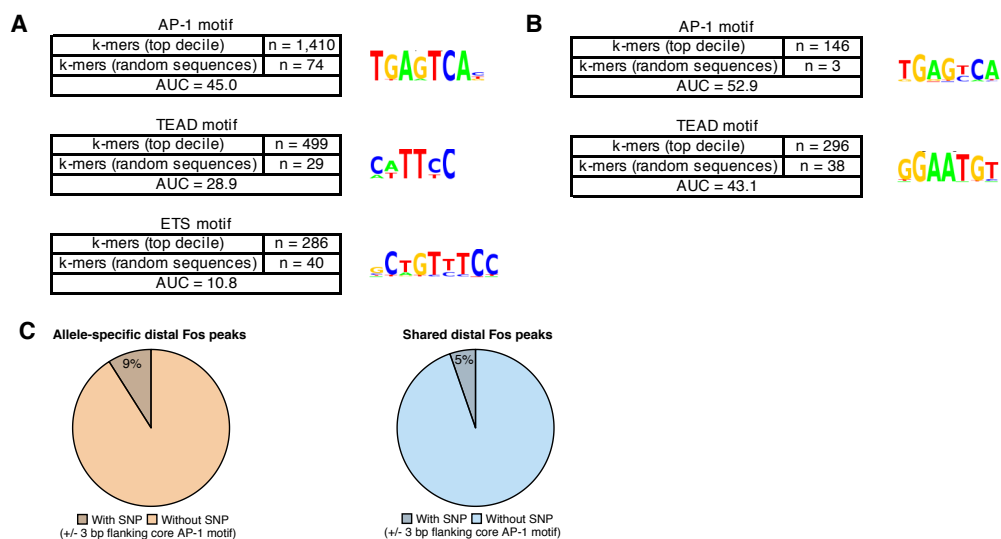

**Figure 3 -- figure supplement 1. Sequence determinants of AP-1 binding.**

Supplement: supp [file elife-76500-supp-v1.zip]

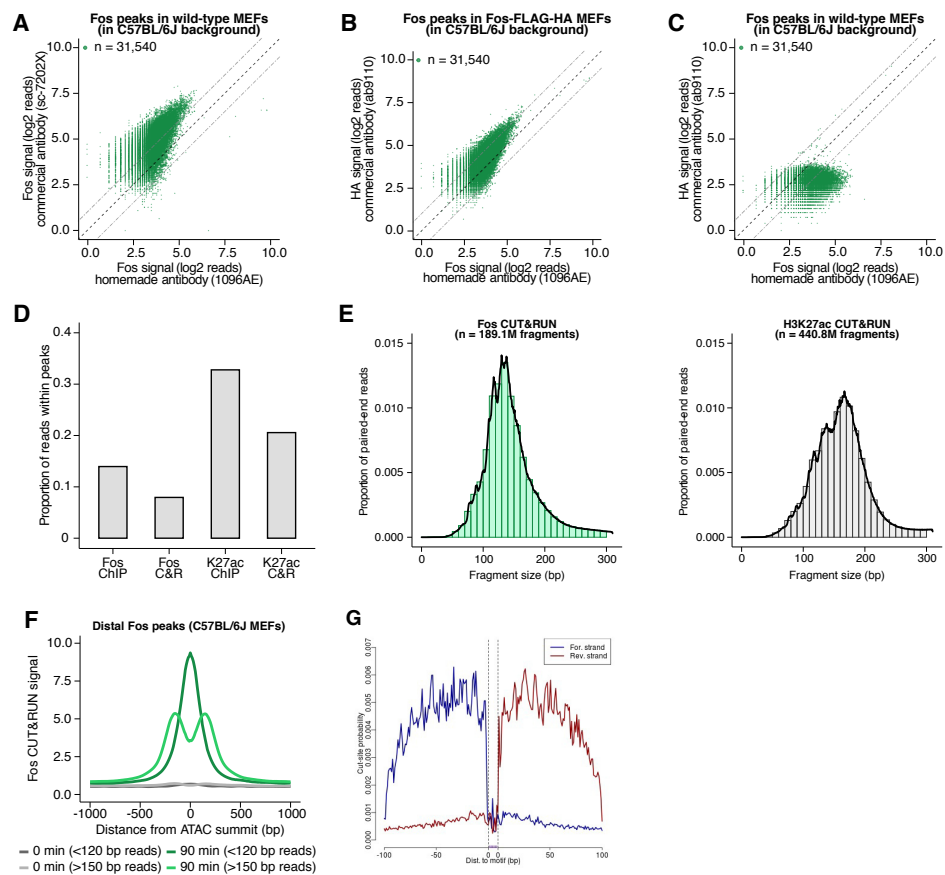

**Figure 3 -- figure supplement 2. Comparison of ChIP-seq and CUT&RUN datasets.**

Supplement: supp [file elife-76500-supp-v1.zip]
